# Supplementary material for: The Inhibitory Mechanism of 7H-Pyrrolo[2,3-d]pyrimidine Derivatives as Inhibitors of P21-Activated Kinase 4 through Molecular Dynamics Simulation
Source: MDPI journal article supplement (doi:10.3390/molecules28010413), 2023-01-03
Supplement: s1 [file s1]

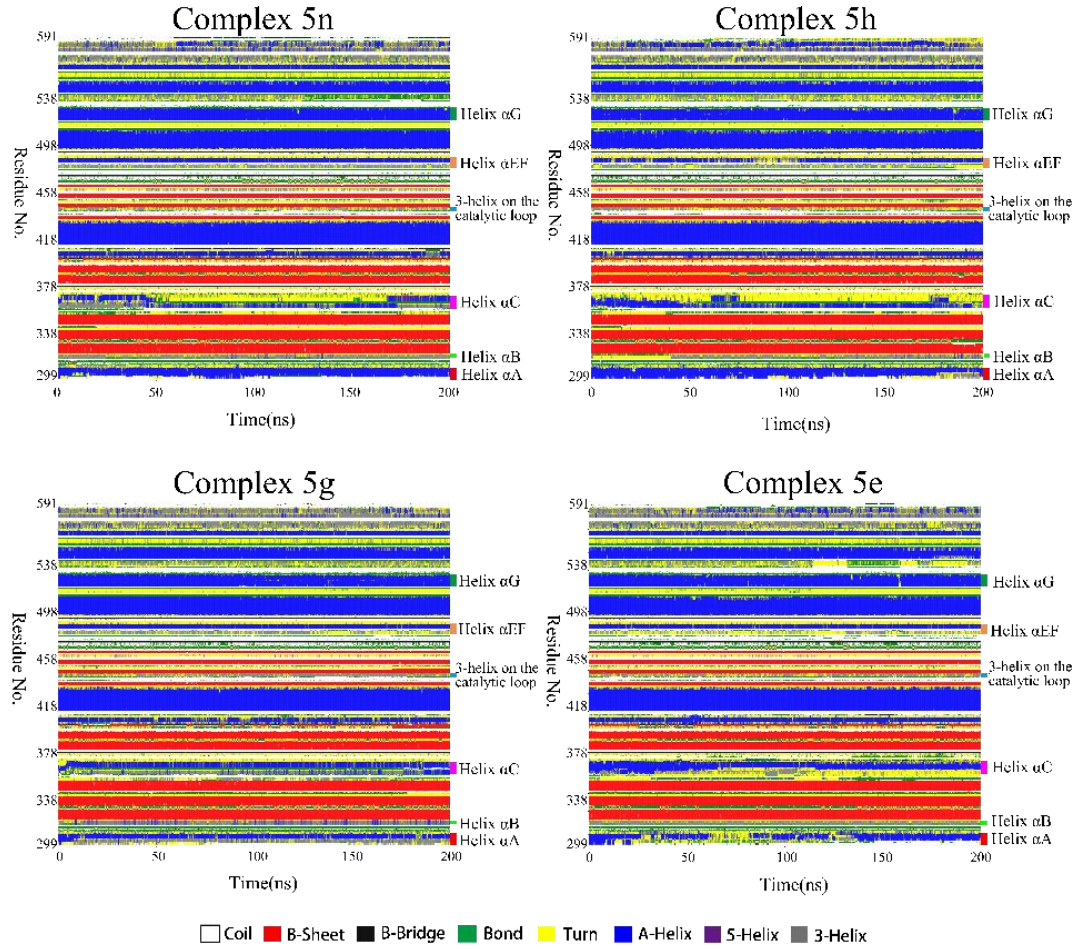

**Figure S1.** The changes in the secondary structure of proteins in the four complexes with simulation time.

**Table S1.** The hydrogen bond occupancy rates and the average numbers of hydrogen bonds in the four complexes during the simulation

| Complex | Bonding residue | Occurrence | Average number |
|---------|-----------------|------------|----------------|
| 5n      | Leu398          | 148.29%    | 2.309          |
|         | Glu396          | 55.83%     |                |
|         | Ile327          | 14.43%     |                |
|         | Asp444          | 6.35%      |                |
|         | Glu29           | 2.95%      |                |
|         | Gly401          | 1.12%      |                |

|    |        |         |       |
|----|--------|---------|-------|
| 5h | Leu398 | 152.54% | 2.092 |
|    | Glu396 | 52.31%  |       |
|    | Ile327 | 1.51%   |       |
|    | Gly401 | 0.93%   |       |
| 5g | Leu398 | 131.49% | 2.031 |
|    | Glu396 | 64.74%  |       |
|    | Ile327 | 2.52%   |       |
|    | Glu329 | 1.21%   |       |
| 5e | Leu398 | 142.04% | 2.143 |
|    | Glu396 | 60.96%  |       |
|    | Glu329 | 7.13%   |       |
|    | Ile327 | 0.65%   |       |

**Table S2. Relative binding free energies calculated by MM/PBSA for the four complexes (kJ·mol<sup>-1</sup>)**

| Energy term             | PAK4/5n | PAK4/5h | PAK4/5g | PAK4/5e |
|-------------------------|---------|---------|---------|---------|
| $\Delta G_{vdW}$        | 0       | 2.374   | 22.842  | 24.083  |
| $\Delta G_{elec}$       | 0       | 9.037   | 6.329   | 16.591  |
| $\Delta G_{PB}$         | 0       | 2.175   | -11.221 | -7.899  |
| $\Delta G_{SA}$         | 0       | 0.166   | 1.766   | 2.371   |
| $\Delta G_{polar}^a$    | 0       | 11.212  | -4.892  | 8.692   |
| $\Delta G_{nonpolar}^b$ | 0       | 2.54    | 24.608  | 26.454  |
| $\Delta G_{bind}^c$     | 0       | 13.752  | 19.803  | 35.162  |

**Table S3. The protonation states of the charged residues**

| Residues           | Lys        | Glu           | Asp           | Arg        |
|--------------------|------------|---------------|---------------|------------|
| Protonation states | protonated | nonprotonated | nonprotonated | protonated |
