# Supplementary material for: The Inhibitory Mechanism of 7H-Pyrrolo[2,3-d]pyrimidine Derivatives as Inhibitors of P21-Activated Kinase 4 through Molecular Dynamics Simulation
Source: Molecules. 2023 Jan 3;28(1):413. doi: 10.3390/molecules28010413 (PMC9823812; doi:10.3390/molecules28010413)
Supplement: Supplementary file 1 [file molecules-28-00413-s001.zip]

Archive with 5 entries (5 files):
- 5e .pdb
- 5g .pdb
- 5h.pdb
- 5n.pdb
- supporting  information.pdf
