# Supplementary material for: The Inhibitory Mechanism of 7H-Pyrrolo[2,3-d]pyrimidine Derivatives as Inhibitors of P21-Activated Kinase 4 through Molecular Dynamics Simulation
Source: Molecules. 2023 Jan 3;28(1):413. doi: 10.3390/molecules28010413 (PMC9823812; doi:10.3390/molecules28010413)
Supplement: Supplementary file 1 [file molecules-28-00413-s001.zip › 5e .pdb]

REMARK    GENERATED BY TRJCONV
TITLE     SERINE/THREONINE-PROTEIN KINASE PAK 4 in water t= 167260.00000 step= 83630000
REMARK    THIS IS A SIMULATION BOX
CRYST1   82.553   82.553   82.553  90.00  90.00  90.00 P 1           1
MODEL        1
ATOM      1  N   SER A 299     103.580  52.650  52.500  1.00  0.00           N
ATOM      2  H1  SER A 299     102.630  52.940  52.340  1.00  0.00           H
ATOM      3  H2  SER A 299     103.890  52.720  53.460  1.00  0.00           H
ATOM      4  H3  SER A 299     104.210  53.290  52.030  1.00  0.00           H
ATOM      5  CA  SER A 299     103.830  51.280  52.120  1.00  0.00           C
ATOM      6  HA  SER A 299     103.760  51.250  51.040  1.00  0.00           H
ATOM      7  CB  SER A 299     105.200  50.950  52.610  1.00  0.00           C
ATOM      8  HB1 SER A 299     105.900  51.700  52.250  1.00  0.00           H
ATOM      9  HB2 SER A 299     105.430  49.980  52.170  1.00  0.00           H
ATOM     10  OG  SER A 299     105.390  50.860  53.980  1.00  0.00           O
ATOM     11  HG  SER A 299     106.160  50.310  54.110  1.00  0.00           H
ATOM     12  C   SER A 299     102.760  50.300  52.740  1.00  0.00           C
ATOM     13  O   SER A 299     102.040  50.600  53.690  1.00  0.00           O
ATOM     14  N   SER A 300     102.710  49.110  52.130  1.00  0.00           N
ATOM     15  H   SER A 300     103.330  48.960  51.340  1.00  0.00           H
ATOM     16  CA  SER A 300     101.770  48.060  52.520  1.00  0.00           C
ATOM     17  HA  SER A 300     101.470  48.250  53.560  1.00  0.00           H
ATOM     18  CB  SER A 300     100.430  48.160  51.720  1.00  0.00           C
ATOM     19  HB1 SER A 300      99.720  47.390  52.010  1.00  0.00           H
ATOM     20  HB2 SER A 300     100.590  47.920  50.670  1.00  0.00           H
ATOM     21  OG  SER A 300      99.890  49.430  51.990  1.00  0.00           O
ATOM     22  HG  SER A 300     100.080  50.000  51.240  1.00  0.00           H
ATOM     23  C   SER A 300     102.420  46.630  52.450  1.00  0.00           C
ATOM     24  O   SER A 300     103.380  46.370  51.750  1.00  0.00           O
ATOM     25  N   HIS A 301     101.630  45.630  52.960  1.00  0.00           N
ATOM     26  H   HIS A 301     100.690  45.880  53.240  1.00  0.00           H
ATOM     27  CA  HIS A 301     101.830  44.210  52.620  1.00  0.00           C
ATOM     28  HA  HIS A 301     102.900  43.970  52.680  1.00  0.00           H
ATOM     29  CB  HIS A 301     100.970  43.350  53.530  1.00  0.00           C
ATOM     30  HB1 HIS A 301      99.900  43.550  53.510  1.00  0.00           H
ATOM     31  HB2 HIS A 301     101.360  43.460  54.540  1.00  0.00           H
ATOM     32  CG  HIS A 301     101.010  41.860  53.220  1.00  0.00           C
ATOM     33  ND1 HIS A 301     102.090  40.980  53.440  1.00  0.00           N
ATOM     34  CE1 HIS A 301     101.720  39.810  53.080  1.00  0.00           C
ATOM     35  HE1 HIS A 301     102.330  38.930  52.950  1.00  0.00           H
ATOM     36  NE2 HIS A 301     100.450  39.870  52.640  1.00  0.00           N
ATOM     37  HE2 HIS A 301      99.970  39.070  52.260  1.00  0.00           H
ATOM     38  CD2 HIS A 301      99.980  41.160  52.710  1.00  0.00           C
ATOM     39  HD2 HIS A 301      99.000  41.560  52.480  1.00  0.00           H
ATOM     40  C   HIS A 301     101.370  43.980  51.180  1.00  0.00           C
ATOM     41  O   HIS A 301     100.350  44.450  50.740  1.00  0.00           O
ATOM     42  N   GLU A 302     102.100  43.140  50.460  1.00  0.00           N
ATOM     43  H   GLU A 302     102.760  42.550  50.960  1.00  0.00           H
ATOM     44  CA  GLU A 302     101.880  42.790  49.090  1.00  0.00           C
ATOM     45  HA  GLU A 302     100.880  43.070  48.740  1.00  0.00           H
ATOM     46  CB  GLU A 302     102.960  43.400  48.210  1.00  0.00           C
ATOM     47  HB1 GLU A 302     103.070  42.740  47.340  1.00  0.00           H
ATOM     48  HB2 GLU A 302     103.920  43.390  48.730  1.00  0.00           H
ATOM     49  CG  GLU A 302     102.690  44.860  47.710  1.00  0.00           C
ATOM     50  HG1 GLU A 302     102.660  45.410  48.650  1.00  0.00           H
ATOM     51  HG2 GLU A 302     101.680  44.910  47.290  1.00  0.00           H
ATOM     52  CD  GLU A 302     103.790  45.230  46.660  1.00  0.00           C
ATOM     53  OE1 GLU A 302     103.680  44.780  45.460  1.00  0.00           O
ATOM     54  OE2 GLU A 302     104.800  45.830  47.080  1.00  0.00           O
ATOM     55  C   GLU A 302     102.310  41.270  49.040  1.00  0.00           C
ATOM     56  O   GLU A 302     103.230  40.760  49.710  1.00  0.00           O
ATOM     57  N   GLN A 303     101.420  40.520  48.370  1.00  0.00           N
ATOM     58  H   GLN A 303     100.840  41.010  47.700  1.00  0.00           H
ATOM     59  CA  GLN A 303     101.110  39.140  48.780  1.00  0.00           C
ATOM     60  HA  GLN A 303     101.090  39.060  49.870  1.00  0.00           H
ATOM     61  CB  GLN A 303      99.780  38.640  48.240  1.00  0.00           C
ATOM     62  HB1 GLN A 303      99.600  37.590  48.470  1.00  0.00           H
ATOM     63  HB2 GLN A 303      99.770  38.800  47.160  1.00  0.00           H
ATOM     64  CG  GLN A 303      98.600  39.440  48.810  1.00  0.00           C
ATOM     65  HG1 GLN A 303      97.860  39.580  48.010  1.00  0.00           H
ATOM     66  HG2 GLN A 303      98.970  40.410  49.130  1.00  0.00           H
ATOM     67  CD  GLN A 303      98.010  38.750  50.020  1.00  0.00           C
ATOM     68  OE1 GLN A 303      98.740  38.380  50.940  1.00  0.00           O
ATOM     69  NE2 GLN A 303      96.710  38.550  50.100  1.00  0.00           N
ATOM     70 1HE2 GLN A 303      96.020  39.010  49.510  1.00  0.00           H
ATOM     71 2HE2 GLN A 303      96.480  38.050  50.940  1.00  0.00           H
ATOM     72  C   GLN A 303     102.200  38.120  48.370  1.00  0.00           C
ATOM     73  O   GLN A 303     102.310  37.060  49.010  1.00  0.00           O
ATOM     74  N   PHE A 304     103.150  38.410  47.450  1.00  0.00           N
ATOM     75  H   PHE A 304     102.970  39.250  46.920  1.00  0.00           H
ATOM     76  CA  PHE A 304     104.440  37.760  47.340  1.00  0.00           C
ATOM     77  HA  PHE A 304     104.310  36.700  47.110  1.00  0.00           H
ATOM     78  CB  PHE A 304     105.310  38.330  46.240  1.00  0.00           C
ATOM     79  HB1 PHE A 304     104.760  38.540  45.320  1.00  0.00           H
ATOM     80  HB2 PHE A 304     106.000  37.510  46.070  1.00  0.00           H
ATOM     81  CG  PHE A 304     106.160  39.580  46.590  1.00  0.00           C
ATOM     82  CD1 PHE A 304     107.470  39.410  47.140  1.00  0.00           C
ATOM     83  HD1 PHE A 304     107.920  38.450  47.340  1.00  0.00           H
ATOM     84  CE1 PHE A 304     108.210  40.470  47.570  1.00  0.00           C
ATOM     85  HE1 PHE A 304     109.180  40.300  48.000  1.00  0.00           H
ATOM     86  CZ  PHE A 304     107.740  41.760  47.560  1.00  0.00           C
ATOM     87  HZ  PHE A 304     108.350  42.540  47.980  1.00  0.00           H
ATOM     88  CE2 PHE A 304     106.480  41.970  47.010  1.00  0.00           C
ATOM     89  HE2 PHE A 304     106.060  42.970  47.040  1.00  0.00           H
ATOM     90  CD2 PHE A 304     105.700  40.930  46.470  1.00  0.00           C
ATOM     91  HD2 PHE A 304     104.690  41.170  46.170  1.00  0.00           H
ATOM     92  C   PHE A 304     105.230  37.670  48.710  1.00  0.00           C
ATOM     93  O   PHE A 304     106.050  36.800  48.900  1.00  0.00           O
ATOM     94  N   ARG A 305     104.990  38.520  49.750  1.00  0.00           N
ATOM     95  H   ARG A 305     104.420  39.340  49.600  1.00  0.00           H
ATOM     96  CA  ARG A 305     105.710  38.430  51.060  1.00  0.00           C
ATOM     97  HA  ARG A 305     106.740  38.250  50.770  1.00  0.00           H
ATOM     98  CB  ARG A 305     105.640  39.790  51.850  1.00  0.00           C
ATOM     99  HB1 ARG A 305     105.990  39.680  52.870  1.00  0.00           H
ATOM    100  HB2 ARG A 305     104.640  40.220  51.740  1.00  0.00           H
ATOM    101  CG  ARG A 305     106.570  40.830  51.180  1.00  0.00           C
ATOM    102  HG1 ARG A 305     106.750  40.640  50.120  1.00  0.00           H
ATOM    103  HG2 ARG A 305     107.510  40.730  51.720  1.00  0.00           H
ATOM    104  CD  ARG A 305     106.160  42.340  51.280  1.00  0.00           C
ATOM    105  HD1 ARG A 305     105.350  42.680  50.640  1.00  0.00           H
ATOM    106  HD2 ARG A 305     106.990  42.890  50.830  1.00  0.00           H
ATOM    107  NE  ARG A 305     106.020  42.940  52.630  1.00  0.00           N
ATOM    108  HE  ARG A 305     105.610  42.390  53.370  1.00  0.00           H
ATOM    109  CZ  ARG A 305     106.150  44.240  52.890  1.00  0.00           C
ATOM    110  NH1 ARG A 305     106.030  44.600  54.140  1.00  0.00           N
ATOM    111 1HH1 ARG A 305     105.780  43.910  54.830  1.00  0.00           H
ATOM    112 2HH1 ARG A 305     105.860  45.580  54.340  1.00  0.00           H
ATOM    113  NH2 ARG A 305     106.350  45.230  52.040  1.00  0.00           N
ATOM    114 1HH2 ARG A 305     106.190  45.050  51.060  1.00  0.00           H
ATOM    115 2HH2 ARG A 305     106.650  46.160  52.320  1.00  0.00           H
ATOM    116  C   ARG A 305     105.260  37.290  52.000  1.00  0.00           C
ATOM    117  O   ARG A 305     106.000  36.930  52.890  1.00  0.00           O
ATOM    118  N   ALA A 306     104.170  36.600  51.670  1.00  0.00           N
ATOM    119  H   ALA A 306     103.570  36.800  50.880  1.00  0.00           H
ATOM    120  CA  ALA A 306     103.870  35.370  52.340  1.00  0.00           C
ATOM    121  HA  ALA A 306     103.750  35.630  53.400  1.00  0.00           H
ATOM    122  CB  ALA A 306     102.510  34.830  51.830  1.00  0.00           C
ATOM    123  HB1 ALA A 306     102.270  33.940  52.410  1.00  0.00           H
ATOM    124  HB2 ALA A 306     101.760  35.620  51.920  1.00  0.00           H
ATOM    125  HB3 ALA A 306     102.620  34.580  50.770  1.00  0.00           H
ATOM    126  C   ALA A 306     104.950  34.330  52.220  1.00  0.00           C
ATOM    127  O   ALA A 306     105.000  33.550  53.180  1.00  0.00           O
ATOM    128  N   ALA A 307     105.790  34.300  51.170  1.00  0.00           N
ATOM    129  H   ALA A 307     105.580  34.840  50.340  1.00  0.00           H
ATOM    130  CA  ALA A 307     106.980  33.420  51.160  1.00  0.00           C
ATOM    131  HA  ALA A 307     106.760  32.370  51.330  1.00  0.00           H
ATOM    132  CB  ALA A 307     107.660  33.750  49.770  1.00  0.00           C
ATOM    133  HB1 ALA A 307     108.080  34.750  49.780  1.00  0.00           H
ATOM    134  HB2 ALA A 307     108.540  33.130  49.590  1.00  0.00           H
ATOM    135  HB3 ALA A 307     106.950  33.680  48.950  1.00  0.00           H
ATOM    136  C   ALA A 307     108.090  33.750  52.290  1.00  0.00           C
ATOM    137  O   ALA A 307     109.010  32.870  52.380  1.00  0.00           O
ATOM    138  N   LEU A 308     108.020  34.900  52.920  1.00  0.00           N
ATOM    139  H   LEU A 308     107.140  35.360  52.720  1.00  0.00           H
ATOM    140  CA  LEU A 308     108.890  35.450  53.960  1.00  0.00           C
ATOM    141  HA  LEU A 308     109.750  34.790  54.040  1.00  0.00           H
ATOM    142  CB  LEU A 308     109.500  36.810  53.550  1.00  0.00           C
ATOM    143  HB1 LEU A 308     110.230  37.200  54.260  1.00  0.00           H
ATOM    144  HB2 LEU A 308     108.730  37.570  53.450  1.00  0.00           H
ATOM    145  CG  LEU A 308     110.340  36.680  52.220  1.00  0.00           C
ATOM    146  HG  LEU A 308     109.780  36.090  51.490  1.00  0.00           H
ATOM    147  CD1 LEU A 308     110.530  38.120  51.670  1.00  0.00           C
ATOM    148 1HD1 LEU A 308     109.610  38.690  51.540  1.00  0.00           H
ATOM    149 2HD1 LEU A 308     111.210  38.720  52.270  1.00  0.00           H
ATOM    150 3HD1 LEU A 308     111.100  38.110  50.740  1.00  0.00           H
ATOM    151  CD2 LEU A 308     111.650  35.880  52.410  1.00  0.00           C
ATOM    152 1HD2 LEU A 308     112.210  36.320  53.230  1.00  0.00           H
ATOM    153 2HD2 LEU A 308     111.430  34.850  52.660  1.00  0.00           H
ATOM    154 3HD2 LEU A 308     112.240  35.930  51.490  1.00  0.00           H
ATOM    155  C   LEU A 308     108.190  35.340  55.320  1.00  0.00           C
ATOM    156  O   LEU A 308     108.790  34.760  56.230  1.00  0.00           O
ATOM    157  N   GLN A 309     106.960  35.810  55.490  1.00  0.00           N
ATOM    158  H   GLN A 309     106.570  36.380  54.750  1.00  0.00           H
ATOM    159  CA  GLN A 309     106.140  35.670  56.740  1.00  0.00           C
ATOM    160  HA  GLN A 309     106.550  36.310  57.520  1.00  0.00           H
ATOM    161  CB  GLN A 309     104.740  36.180  56.350  1.00  0.00           C
ATOM    162  HB1 GLN A 309     103.930  36.020  57.060  1.00  0.00           H
ATOM    163  HB2 GLN A 309     104.380  35.650  55.470  1.00  0.00           H
ATOM    164  CG  GLN A 309     104.680  37.660  56.070  1.00  0.00           C
ATOM    165  HG1 GLN A 309     105.360  38.040  55.310  1.00  0.00           H
ATOM    166  HG2 GLN A 309     104.830  38.270  56.960  1.00  0.00           H
ATOM    167  CD  GLN A 309     103.320  38.050  55.560  1.00  0.00           C
ATOM    168  OE1 GLN A 309     102.650  37.330  54.780  1.00  0.00           O
ATOM    169  NE2 GLN A 309     102.770  39.160  55.860  1.00  0.00           N
ATOM    170 1HE2 GLN A 309     103.200  39.680  56.620  1.00  0.00           H
ATOM    171 2HE2 GLN A 309     101.820  39.360  55.610  1.00  0.00           H
ATOM    172  C   GLN A 309     106.020  34.260  57.290  1.00  0.00           C
ATOM    173  O   GLN A 309     105.940  33.980  58.430  1.00  0.00           O
ATOM    174  N   LEU A 310     106.180  33.270  56.390  1.00  0.00           N
ATOM    175  H   LEU A 310     106.170  33.530  55.410  1.00  0.00           H
ATOM    176  CA  LEU A 310     106.070  31.910  56.740  1.00  0.00           C
ATOM    177  HA  LEU A 310     105.360  31.780  57.550  1.00  0.00           H
ATOM    178  CB  LEU A 310     105.560  31.210  55.490  1.00  0.00           C
ATOM    179  HB1 LEU A 310     105.920  30.190  55.510  1.00  0.00           H
ATOM    180  HB2 LEU A 310     106.100  31.590  54.620  1.00  0.00           H
ATOM    181  CG  LEU A 310     104.030  31.360  55.160  1.00  0.00           C
ATOM    182  HG  LEU A 310     103.690  32.380  54.950  1.00  0.00           H
ATOM    183  CD1 LEU A 310     103.840  30.510  53.890  1.00  0.00           C
ATOM    184 1HD1 LEU A 310     102.790  30.620  53.630  1.00  0.00           H
ATOM    185 2HD1 LEU A 310     104.550  30.880  53.160  1.00  0.00           H
ATOM    186 3HD1 LEU A 310     104.010  29.470  54.160  1.00  0.00           H
ATOM    187  CD2 LEU A 310     103.330  30.830  56.430  1.00  0.00           C
ATOM    188 1HD2 LEU A 310     103.200  31.720  57.040  1.00  0.00           H
ATOM    189 2HD2 LEU A 310     102.340  30.450  56.190  1.00  0.00           H
ATOM    190 3HD2 LEU A 310     103.940  30.050  56.880  1.00  0.00           H
ATOM    191  C   LEU A 310     107.450  31.260  57.260  1.00  0.00           C
ATOM    192  O   LEU A 310     107.330  30.170  57.790  1.00  0.00           O
ATOM    193  N   VAL A 311     108.610  31.850  56.980  1.00  0.00           N
ATOM    194  H   VAL A 311     108.660  32.530  56.240  1.00  0.00           H
ATOM    195  CA  VAL A 311     109.910  31.240  57.380  1.00  0.00           C
ATOM    196  HA  VAL A 311     109.680  30.430  58.070  1.00  0.00           H
ATOM    197  CB  VAL A 311     110.450  30.580  56.110  1.00  0.00           C
ATOM    198  HB  VAL A 311     111.470  30.350  56.420  1.00  0.00           H
ATOM    199  CG1 VAL A 311     109.820  29.240  55.730  1.00  0.00           C
ATOM    200 1HG1 VAL A 311     110.420  28.850  54.900  1.00  0.00           H
ATOM    201 2HG1 VAL A 311     110.000  28.520  56.540  1.00  0.00           H
ATOM    202 3HG1 VAL A 311     108.760  29.350  55.510  1.00  0.00           H
ATOM    203  CG2 VAL A 311     110.570  31.530  54.860  1.00  0.00           C
ATOM    204 1HG2 VAL A 311     111.260  31.190  54.080  1.00  0.00           H
ATOM    205 2HG2 VAL A 311     109.620  31.850  54.440  1.00  0.00           H
ATOM    206 3HG2 VAL A 311     111.010  32.480  55.180  1.00  0.00           H
ATOM    207  C   VAL A 311     110.970  32.240  57.980  1.00  0.00           C
ATOM    208  O   VAL A 311     112.060  31.830  58.390  1.00  0.00           O
ATOM    209  N   VAL A 312     110.650  33.550  58.140  1.00  0.00           N
ATOM    210  H   VAL A 312     109.690  33.790  57.930  1.00  0.00           H
ATOM    211  CA  VAL A 312     111.420  34.420  59.060  1.00  0.00           C
ATOM    212  HA  VAL A 312     112.490  34.350  58.900  1.00  0.00           H
ATOM    213  CB  VAL A 312     111.140  35.930  58.900  1.00  0.00           C
ATOM    214  HB  VAL A 312     111.550  36.480  59.740  1.00  0.00           H
ATOM    215  CG1 VAL A 312     111.690  36.410  57.600  1.00  0.00           C
ATOM    216 1HG1 VAL A 312     111.220  35.740  56.880  1.00  0.00           H
ATOM    217 2HG1 VAL A 312     111.300  37.400  57.360  1.00  0.00           H
ATOM    218 3HG1 VAL A 312     112.770  36.370  57.480  1.00  0.00           H
ATOM    219  CG2 VAL A 312     109.660  36.330  59.030  1.00  0.00           C
ATOM    220 1HG2 VAL A 312     109.260  35.850  59.930  1.00  0.00           H
ATOM    221 2HG2 VAL A 312     109.570  37.390  59.240  1.00  0.00           H
ATOM    222 3HG2 VAL A 312     109.040  35.940  58.220  1.00  0.00           H
ATOM    223  C   VAL A 312     111.120  34.030  60.480  1.00  0.00           C
ATOM    224  O   VAL A 312     110.050  33.560  60.810  1.00  0.00           O
ATOM    225  N   ASP A 313     112.070  34.140  61.400  1.00  0.00           N
ATOM    226  H   ASP A 313     112.930  34.570  61.070  1.00  0.00           H
ATOM    227  CA  ASP A 313     112.040  34.120  62.850  1.00  0.00           C
ATOM    228  HA  ASP A 313     111.500  33.290  63.300  1.00  0.00           H
ATOM    229  CB  ASP A 313     113.560  34.160  63.320  1.00  0.00           C
ATOM    230  HB1 ASP A 313     113.790  34.070  64.380  1.00  0.00           H
ATOM    231  HB2 ASP A 313     113.990  35.130  63.040  1.00  0.00           H
ATOM    232  CG  ASP A 313     114.420  33.130  62.600  1.00  0.00           C
ATOM    233  OD1 ASP A 313     115.400  33.490  61.840  1.00  0.00           O
ATOM    234  OD2 ASP A 313     114.300  31.870  62.790  1.00  0.00           O
ATOM    235  C   ASP A 313     111.280  35.390  63.490  1.00  0.00           C
ATOM    236  O   ASP A 313     111.050  36.390  62.810  1.00  0.00           O
ATOM    237  N   PRO A 314     110.850  35.410  64.750  1.00  0.00           N
ATOM    238  CD  PRO A 314     111.080  34.430  65.790  1.00  0.00           C
ATOM    239  HD1 PRO A 314     112.130  34.240  66.040  1.00  0.00           H
ATOM    240  HD2 PRO A 314     110.700  33.460  65.470  1.00  0.00           H
ATOM    241  CG  PRO A 314     110.350  34.880  67.010  1.00  0.00           C
ATOM    242  HG1 PRO A 314     111.020  35.580  67.510  1.00  0.00           H
ATOM    243  HG2 PRO A 314     110.050  34.020  67.610  1.00  0.00           H
ATOM    244  CB  PRO A 314     109.200  35.620  66.370  1.00  0.00           C
ATOM    245  HB1 PRO A 314     108.760  36.300  67.100  1.00  0.00           H
ATOM    246  HB2 PRO A 314     108.460  34.940  65.960  1.00  0.00           H
ATOM    247  CA  PRO A 314     109.860  36.360  65.230  1.00  0.00           C
ATOM    248  HA  PRO A 314     109.060  36.470  64.500  1.00  0.00           H
ATOM    249  C   PRO A 314     110.420  37.680  65.640  1.00  0.00           C
ATOM    250  O   PRO A 314     111.390  37.840  66.480  1.00  0.00           O
ATOM    251  N   GLY A 315     109.850  38.790  65.090  1.00  0.00           N
ATOM    252  H   GLY A 315     109.130  38.730  64.380  1.00  0.00           H
ATOM    253  CA  GLY A 315     110.230  40.230  65.370  1.00  0.00           C
ATOM    254  HA1 GLY A 315     110.420  40.350  66.430  1.00  0.00           H
ATOM    255  HA2 GLY A 315     109.400  40.860  65.070  1.00  0.00           H
ATOM    256  C   GLY A 315     111.490  40.530  64.610  1.00  0.00           C
ATOM    257  O   GLY A 315     111.480  40.530  63.380  1.00  0.00           O
ATOM    258  N   ASP A 316     112.570  40.850  65.330  1.00  0.00           N
ATOM    259  H   ASP A 316     112.330  41.010  66.300  1.00  0.00           H
ATOM    260  CA  ASP A 316     113.840  41.450  64.910  1.00  0.00           C
ATOM    261  HA  ASP A 316     114.100  40.980  63.960  1.00  0.00           H
ATOM    262  CB  ASP A 316     113.710  42.970  64.550  1.00  0.00           C
ATOM    263  HB1 ASP A 316     112.930  43.040  63.790  1.00  0.00           H
ATOM    264  HB2 ASP A 316     114.470  43.290  63.850  1.00  0.00           H
ATOM    265  CG  ASP A 316     113.400  43.830  65.780  1.00  0.00           C
ATOM    266  OD1 ASP A 316     112.360  44.510  65.850  1.00  0.00           O
ATOM    267  OD2 ASP A 316     114.300  44.020  66.610  1.00  0.00           O
ATOM    268  C   ASP A 316     115.040  41.200  65.900  1.00  0.00           C
ATOM    269  O   ASP A 316     114.800  40.600  66.970  1.00  0.00           O
ATOM    270  N   PRO A 317     116.270  41.610  65.580  1.00  0.00           N
ATOM    271  CD  PRO A 317     116.700  41.700  64.160  1.00  0.00           C
ATOM    272  HD1 PRO A 317     116.610  42.720  63.790  1.00  0.00           H
ATOM    273  HD2 PRO A 317     116.160  40.930  63.610  1.00  0.00           H
ATOM    274  CG  PRO A 317     118.220  41.430  64.010  1.00  0.00           C
ATOM    275  HG1 PRO A 317     118.640  42.430  64.000  1.00  0.00           H
ATOM    276  HG2 PRO A 317     118.470  40.870  63.110  1.00  0.00           H
ATOM    277  CB  PRO A 317     118.510  40.690  65.300  1.00  0.00           C
ATOM    278  HB1 PRO A 317     119.470  40.840  65.800  1.00  0.00           H
ATOM    279  HB2 PRO A 317     118.250  39.640  65.170  1.00  0.00           H
ATOM    280  CA  PRO A 317     117.460  41.160  66.290  1.00  0.00           C
ATOM    281  HA  PRO A 317     117.190  40.320  66.930  1.00  0.00           H
ATOM    282  C   PRO A 317     118.030  42.340  67.130  1.00  0.00           C
ATOM    283  O   PRO A 317     118.900  42.130  67.930  1.00  0.00           O
ATOM    284  N   ARG A 318     117.430  43.560  67.110  1.00  0.00           N
ATOM    285  H   ARG A 318     116.640  43.700  66.500  1.00  0.00           H
ATOM    286  CA  ARG A 318     117.780  44.670  67.990  1.00  0.00           C
ATOM    287  HA  ARG A 318     118.810  44.950  67.780  1.00  0.00           H
ATOM    288  CB  ARG A 318     116.890  45.890  67.660  1.00  0.00           C
ATOM    289  HB1 ARG A 318     117.100  46.680  68.390  1.00  0.00           H
ATOM    290  HB2 ARG A 318     115.860  45.640  67.930  1.00  0.00           H
ATOM    291  CG  ARG A 318     116.990  46.360  66.210  1.00  0.00           C
ATOM    292  HG1 ARG A 318     116.740  45.520  65.570  1.00  0.00           H
ATOM    293  HG2 ARG A 318     117.990  46.760  66.030  1.00  0.00           H
ATOM    294  CD  ARG A 318     115.950  47.450  65.830  1.00  0.00           C
ATOM    295  HD1 ARG A 318     116.260  48.010  64.950  1.00  0.00           H
ATOM    296  HD2 ARG A 318     115.900  48.140  66.670  1.00  0.00           H
ATOM    297  NE  ARG A 318     114.620  46.850  65.580  1.00  0.00           N
ATOM    298  HE  ARG A 318     114.430  46.010  66.110  1.00  0.00           H
ATOM    299  CZ  ARG A 318     113.740  47.400  64.710  1.00  0.00           C
ATOM    300  NH1 ARG A 318     113.910  48.480  64.040  1.00  0.00           N
ATOM    301 1HH1 ARG A 318     114.640  49.170  63.950  1.00  0.00           H
ATOM    302 2HH1 ARG A 318     113.150  48.670  63.410  1.00  0.00           H
ATOM    303  NH2 ARG A 318     112.570  46.830  64.550  1.00  0.00           N
ATOM    304 1HH2 ARG A 318     112.390  46.050  65.160  1.00  0.00           H
ATOM    305 2HH2 ARG A 318     111.940  47.210  63.860  1.00  0.00           H
ATOM    306  C   ARG A 318     117.760  44.340  69.420  1.00  0.00           C
ATOM    307  O   ARG A 318     118.350  45.070  70.200  1.00  0.00           O
ATOM    308  N   SER A 319     117.160  43.230  69.890  1.00  0.00           N
ATOM    309  H   SER A 319     116.710  42.540  69.300  1.00  0.00           H
ATOM    310  CA  SER A 319     117.090  42.900  71.350  1.00  0.00           C
ATOM    311  HA  SER A 319     116.820  43.770  71.960  1.00  0.00           H
ATOM    312  CB  SER A 319     116.020  41.990  71.760  1.00  0.00           C
ATOM    313  HB1 SER A 319     114.990  42.320  71.580  1.00  0.00           H
ATOM    314  HB2 SER A 319     116.180  41.780  72.820  1.00  0.00           H
ATOM    315  OG  SER A 319     116.100  40.680  71.210  1.00  0.00           O
ATOM    316  HG  SER A 319     115.340  40.200  71.550  1.00  0.00           H
ATOM    317  C   SER A 319     118.400  42.290  71.820  1.00  0.00           C
ATOM    318  O   SER A 319     118.630  42.220  73.060  1.00  0.00           O
ATOM    319  N   TYR A 320     119.220  41.870  70.860  1.00  0.00           N
ATOM    320  H   TYR A 320     118.950  42.060  69.900  1.00  0.00           H
ATOM    321  CA  TYR A 320     120.500  41.150  71.050  1.00  0.00           C
ATOM    322  HA  TYR A 320     120.780  41.300  72.090  1.00  0.00           H
ATOM    323  CB  TYR A 320     120.230  39.610  71.080  1.00  0.00           C
ATOM    324  HB1 TYR A 320     119.370  39.310  71.680  1.00  0.00           H
ATOM    325  HB2 TYR A 320     121.130  39.180  71.520  1.00  0.00           H
ATOM    326  CG  TYR A 320     119.990  39.020  69.730  1.00  0.00           C
ATOM    327  CD1 TYR A 320     118.740  38.770  69.210  1.00  0.00           C
ATOM    328  HD1 TYR A 320     117.890  39.000  69.840  1.00  0.00           H
ATOM    329  CE1 TYR A 320     118.590  38.240  67.880  1.00  0.00           C
ATOM    330  HE1 TYR A 320     117.580  38.070  67.540  1.00  0.00           H
ATOM    331  CZ  TYR A 320     119.700  37.800  67.130  1.00  0.00           C
ATOM    332  OH  TYR A 320     119.500  37.080  66.010  1.00  0.00           O
ATOM    333  HH  TYR A 320     118.630  36.660  66.010  1.00  0.00           H
ATOM    334  CE2 TYR A 320     120.990  37.990  67.660  1.00  0.00           C
ATOM    335  HE2 TYR A 320     121.830  37.610  67.100  1.00  0.00           H
ATOM    336  CD2 TYR A 320     121.100  38.600  68.970  1.00  0.00           C
ATOM    337  HD2 TYR A 320     122.060  38.570  69.460  1.00  0.00           H
ATOM    338  C   TYR A 320     121.650  41.600  70.160  1.00  0.00           C
ATOM    339  O   TYR A 320     122.760  41.210  70.410  1.00  0.00           O
ATOM    340  N   LEU A 321     121.450  42.530  69.220  1.00  0.00           N
ATOM    341  H   LEU A 321     120.490  42.780  69.010  1.00  0.00           H
ATOM    342  CA  LEU A 321     122.480  43.160  68.390  1.00  0.00           C
ATOM    343  HA  LEU A 321     123.490  42.860  68.650  1.00  0.00           H
ATOM    344  CB  LEU A 321     122.200  42.920  66.870  1.00  0.00           C
ATOM    345  HB1 LEU A 321     122.970  43.490  66.360  1.00  0.00           H
ATOM    346  HB2 LEU A 321     121.200  43.240  66.540  1.00  0.00           H
ATOM    347  CG  LEU A 321     122.350  41.520  66.420  1.00  0.00           C
ATOM    348  HG  LEU A 321     121.490  41.030  66.870  1.00  0.00           H
ATOM    349  CD1 LEU A 321     122.310  41.380  64.900  1.00  0.00           C
ATOM    350 1HD1 LEU A 321     121.430  41.940  64.590  1.00  0.00           H
ATOM    351 2HD1 LEU A 321     123.250  41.860  64.610  1.00  0.00           H
ATOM    352 3HD1 LEU A 321     122.300  40.340  64.560  1.00  0.00           H
ATOM    353  CD2 LEU A 321     123.670  40.920  66.830  1.00  0.00           C
ATOM    354 1HD2 LEU A 321     124.470  41.650  66.740  1.00  0.00           H
ATOM    355 2HD2 LEU A 321     123.620  40.550  67.850  1.00  0.00           H
ATOM    356 3HD2 LEU A 321     123.910  40.080  66.170  1.00  0.00           H
ATOM    357  C   LEU A 321     122.370  44.630  68.550  1.00  0.00           C
ATOM    358  O   LEU A 321     121.260  45.110  68.720  1.00  0.00           O
ATOM    359  N   ASP A 322     123.510  45.410  68.470  1.00  0.00           N
ATOM    360  H   ASP A 322     124.380  44.930  68.320  1.00  0.00           H
ATOM    361  CA  ASP A 322     123.710  46.830  68.710  1.00  0.00           C
ATOM    362  HA  ASP A 322     122.800  47.370  68.450  1.00  0.00           H
ATOM    363  CB  ASP A 322     124.140  47.020  70.180  1.00  0.00           C
ATOM    364  HB1 ASP A 322     125.100  46.530  70.300  1.00  0.00           H
ATOM    365  HB2 ASP A 322     123.550  46.400  70.870  1.00  0.00           H
ATOM    366  CG  ASP A 322     124.130  48.400  70.770  1.00  0.00           C
ATOM    367  OD1 ASP A 322     123.540  49.350  70.160  1.00  0.00           O
ATOM    368  OD2 ASP A 322     124.650  48.790  71.880  1.00  0.00           O
ATOM    369  C   ASP A 322     124.890  47.420  67.800  1.00  0.00           C
ATOM    370  O   ASP A 322     125.470  46.710  67.000  1.00  0.00           O
ATOM    371  N   ASN A 323     125.250  48.730  67.960  1.00  0.00           N
ATOM    372  H   ASN A 323     124.670  49.310  68.550  1.00  0.00           H
ATOM    373  CA  ASN A 323     126.360  49.420  67.310  1.00  0.00           C
ATOM    374  HA  ASN A 323     126.280  50.490  67.510  1.00  0.00           H
ATOM    375  CB  ASN A 323     127.650  49.050  67.960  1.00  0.00           C
ATOM    376  HB1 ASN A 323     128.450  49.610  67.470  1.00  0.00           H
ATOM    377  HB2 ASN A 323     127.720  47.980  67.800  1.00  0.00           H
ATOM    378  CG  ASN A 323     127.790  49.370  69.440  1.00  0.00           C
ATOM    379  OD1 ASN A 323     128.040  48.440  70.210  1.00  0.00           O
ATOM    380  ND2 ASN A 323     127.610  50.570  69.870  1.00  0.00           N
ATOM    381 1HD2 ASN A 323     127.570  51.360  69.240  1.00  0.00           H
ATOM    382 2HD2 ASN A 323     127.520  50.690  70.860  1.00  0.00           H
ATOM    383  C   ASN A 323     126.260  49.230  65.710  1.00  0.00           C
ATOM    384  O   ASN A 323     127.260  48.920  65.050  1.00  0.00           O
ATOM    385  N   PHE A 324     125.090  49.370  65.150  1.00  0.00           N
ATOM    386  H   PHE A 324     124.360  49.740  65.750  1.00  0.00           H
ATOM    387  CA  PHE A 324     124.830  49.040  63.770  1.00  0.00           C
ATOM    388  HA  PHE A 324     125.150  48.010  63.610  1.00  0.00           H
ATOM    389  CB  PHE A 324     123.320  49.110  63.710  1.00  0.00           C
ATOM    390  HB1 PHE A 324     122.980  49.500  62.750  1.00  0.00           H
ATOM    391  HB2 PHE A 324     122.850  49.760  64.440  1.00  0.00           H
ATOM    392  CG  PHE A 324     122.670  47.730  63.800  1.00  0.00           C
ATOM    393  CD1 PHE A 324     122.570  46.900  62.680  1.00  0.00           C
ATOM    394  HD1 PHE A 324     122.980  47.280  61.760  1.00  0.00           H
ATOM    395  CE1 PHE A 324     121.880  45.680  62.740  1.00  0.00           C
ATOM    396  HE1 PHE A 324     121.740  45.080  61.850  1.00  0.00           H
ATOM    397  CZ  PHE A 324     121.290  45.290  63.960  1.00  0.00           C
ATOM    398  HZ  PHE A 324     120.880  44.300  64.050  1.00  0.00           H
ATOM    399  CE2 PHE A 324     121.380  46.070  65.110  1.00  0.00           C
ATOM    400  HE2 PHE A 324     121.090  45.730  66.090  1.00  0.00           H
ATOM    401  CD2 PHE A 324     121.990  47.300  65.000  1.00  0.00           C
ATOM    402  HD2 PHE A 324     122.070  47.970  65.840  1.00  0.00           H
ATOM    403  C   PHE A 324     125.500  50.080  62.890  1.00  0.00           C
ATOM    404  O   PHE A 324     125.310  51.290  63.050  1.00  0.00           O
ATOM    405  N   ILE A 325     126.370  49.670  61.930  1.00  0.00           N
ATOM    406  H   ILE A 325     126.770  48.750  62.040  1.00  0.00           H
ATOM    407  CA  ILE A 325     127.070  50.520  61.000  1.00  0.00           C
ATOM    408  HA  ILE A 325     126.390  51.350  60.770  1.00  0.00           H
ATOM    409  CB  ILE A 325     128.370  50.980  61.560  1.00  0.00           C
ATOM    410  HB  ILE A 325     128.220  51.490  62.510  1.00  0.00           H
ATOM    411  CG2 ILE A 325     129.480  49.950  61.650  1.00  0.00           C
ATOM    412 1HG2 ILE A 325     129.820  49.590  60.680  1.00  0.00           H
ATOM    413 2HG2 ILE A 325     130.240  50.340  62.330  1.00  0.00           H
ATOM    414 3HG2 ILE A 325     129.100  49.040  62.110  1.00  0.00           H
ATOM    415  CG1 ILE A 325     128.980  52.100  60.690  1.00  0.00           C
ATOM    416 1HG1 ILE A 325     128.140  52.660  60.270  1.00  0.00           H
ATOM    417 2HG1 ILE A 325     129.560  51.690  59.860  1.00  0.00           H
ATOM    418  CD  ILE A 325     129.900  53.060  61.500  1.00  0.00           C
ATOM    419  HD1 ILE A 325     130.100  53.910  60.850  1.00  0.00           H
ATOM    420  HD2 ILE A 325     129.280  53.490  62.290  1.00  0.00           H
ATOM    421  HD3 ILE A 325     130.870  52.600  61.710  1.00  0.00           H
ATOM    422  C   ILE A 325     127.230  49.890  59.620  1.00  0.00           C
ATOM    423  O   ILE A 325     127.650  48.740  59.460  1.00  0.00           O
ATOM    424  N   LYS A 326     126.970  50.720  58.550  1.00  0.00           N
ATOM    425  H   LYS A 326     126.650  51.670  58.680  1.00  0.00           H
ATOM    426  CA  LYS A 326     127.010  50.120  57.220  1.00  0.00           C
ATOM    427  HA  LYS A 326     126.610  49.110  57.210  1.00  0.00           H
ATOM    428  CB  LYS A 326     126.250  51.070  56.290  1.00  0.00           C
ATOM    429  HB1 LYS A 326     126.770  52.020  56.200  1.00  0.00           H
ATOM    430  HB2 LYS A 326     125.260  51.150  56.740  1.00  0.00           H
ATOM    431  CG  LYS A 326     126.120  50.600  54.850  1.00  0.00           C
ATOM    432  HG1 LYS A 326     125.700  49.600  54.780  1.00  0.00           H
ATOM    433  HG2 LYS A 326     127.150  50.590  54.490  1.00  0.00           H
ATOM    434  CD  LYS A 326     125.390  51.640  54.020  1.00  0.00           C
ATOM    435  HD1 LYS A 326     125.700  52.650  54.260  1.00  0.00           H
ATOM    436  HD2 LYS A 326     124.320  51.630  54.230  1.00  0.00           H
ATOM    437  CE  LYS A 326     125.630  51.300  52.430  1.00  0.00           C
ATOM    438  HE1 LYS A 326     124.970  50.520  52.070  1.00  0.00           H
ATOM    439  HE2 LYS A 326     126.670  51.050  52.210  1.00  0.00           H
ATOM    440  NZ  LYS A 326     125.440  52.560  51.680  1.00  0.00           N
ATOM    441  HZ1 LYS A 326     126.150  53.250  51.890  1.00  0.00           H
ATOM    442  HZ2 LYS A 326     125.420  52.600  50.670  1.00  0.00           H
ATOM    443  HZ3 LYS A 326     124.590  53.010  52.000  1.00  0.00           H
ATOM    444  C   LYS A 326     128.430  49.980  56.790  1.00  0.00           C
ATOM    445  O   LYS A 326     129.290  50.840  56.980  1.00  0.00           O
ATOM    446  N   ILE A 327     128.760  48.840  56.160  1.00  0.00           N
ATOM    447  H   ILE A 327     128.020  48.160  56.070  1.00  0.00           H
ATOM    448  CA  ILE A 327     130.140  48.420  55.600  1.00  0.00           C
ATOM    449  HA  ILE A 327     130.760  49.320  55.630  1.00  0.00           H
ATOM    450  CB  ILE A 327     130.830  47.400  56.500  1.00  0.00           C
ATOM    451  HB  ILE A 327     131.830  47.260  56.070  1.00  0.00           H
ATOM    452  CG2 ILE A 327     131.220  48.090  57.870  1.00  0.00           C
ATOM    453 1HG2 ILE A 327     131.560  47.450  58.690  1.00  0.00           H
ATOM    454 2HG2 ILE A 327     132.030  48.790  57.670  1.00  0.00           H
ATOM    455 3HG2 ILE A 327     130.370  48.610  58.310  1.00  0.00           H
ATOM    456  CG1 ILE A 327     130.140  46.050  56.650  1.00  0.00           C
ATOM    457 1HG1 ILE A 327     129.150  46.220  57.070  1.00  0.00           H
ATOM    458 2HG1 ILE A 327     130.700  45.480  57.390  1.00  0.00           H
ATOM    459  CD  ILE A 327     130.050  45.180  55.400  1.00  0.00           C
ATOM    460  HD1 ILE A 327     130.980  45.190  54.840  1.00  0.00           H
ATOM    461  HD2 ILE A 327     129.790  44.150  55.650  1.00  0.00           H
ATOM    462  HD3 ILE A 327     129.260  45.530  54.730  1.00  0.00           H
ATOM    463  C   ILE A 327     130.200  47.960  54.120  1.00  0.00           C
ATOM    464  O   ILE A 327     131.260  47.630  53.560  1.00  0.00           O
ATOM    465  N   GLY A 328     129.030  48.010  53.570  1.00  0.00           N
ATOM    466  H   GLY A 328     128.210  48.300  54.080  1.00  0.00           H
ATOM    467  CA  GLY A 328     128.850  47.710  52.170  1.00  0.00           C
ATOM    468  HA1 GLY A 328     129.330  46.760  51.950  1.00  0.00           H
ATOM    469  HA2 GLY A 328     129.430  48.480  51.660  1.00  0.00           H
ATOM    470  C   GLY A 328     127.380  47.830  51.620  1.00  0.00           C
ATOM    471  O   GLY A 328     126.450  48.000  52.410  1.00  0.00           O
ATOM    472  N   GLU A 329     127.240  47.740  50.250  1.00  0.00           N
ATOM    473  H   GLU A 329     128.030  47.430  49.700  1.00  0.00           H
ATOM    474  CA  GLU A 329     125.940  47.820  49.560  1.00  0.00           C
ATOM    475  HA  GLU A 329     125.240  47.490  50.320  1.00  0.00           H
ATOM    476  CB  GLU A 329     125.580  49.250  49.200  1.00  0.00           C
ATOM    477  HB1 GLU A 329     125.500  49.760  50.160  1.00  0.00           H
ATOM    478  HB2 GLU A 329     124.640  49.280  48.660  1.00  0.00           H
ATOM    479  CG  GLU A 329     126.630  49.880  48.190  1.00  0.00           C
ATOM    480  HG1 GLU A 329     126.640  49.380  47.220  1.00  0.00           H
ATOM    481  HG2 GLU A 329     127.640  49.640  48.530  1.00  0.00           H
ATOM    482  CD  GLU A 329     126.450  51.410  48.160  1.00  0.00           C
ATOM    483  OE1 GLU A 329     126.130  51.900  47.050  1.00  0.00           O
ATOM    484  OE2 GLU A 329     126.800  52.020  49.180  1.00  0.00           O
ATOM    485  C   GLU A 329     125.800  46.850  48.380  1.00  0.00           C
ATOM    486  O   GLU A 329     126.780  46.280  47.930  1.00  0.00           O
ATOM    487  N   GLY A 330     124.600  46.650  47.840  1.00  0.00           N
ATOM    488  H   GLY A 330     123.780  47.030  48.280  1.00  0.00           H
ATOM    489  CA  GLY A 330     124.450  45.790  46.670  1.00  0.00           C
ATOM    490  HA1 GLY A 330     124.510  44.770  47.040  1.00  0.00           H
ATOM    491  HA2 GLY A 330     125.250  45.960  45.950  1.00  0.00           H
ATOM    492  C   GLY A 330     123.100  45.960  45.960  1.00  0.00           C
ATOM    493  O   GLY A 330     122.320  46.870  46.130  1.00  0.00           O
ATOM    494  N   SER A 331     122.940  45.100  45.000  1.00  0.00           N
ATOM    495  H   SER A 331     123.530  44.290  45.060  1.00  0.00           H
ATOM    496  CA  SER A 331     121.810  44.970  44.060  1.00  0.00           C
ATOM    497  HA  SER A 331     121.670  45.900  43.510  1.00  0.00           H
ATOM    498  CB  SER A 331     122.070  43.960  42.900  1.00  0.00           C
ATOM    499  HB1 SER A 331     121.240  44.050  42.200  1.00  0.00           H
ATOM    500  HB2 SER A 331     122.130  42.920  43.230  1.00  0.00           H
ATOM    501  OG  SER A 331     123.310  44.020  42.250  1.00  0.00           O
ATOM    502  HG  SER A 331     123.470  44.960  42.140  1.00  0.00           H
ATOM    503  C   SER A 331     120.510  44.640  44.810  1.00  0.00           C
ATOM    504  O   SER A 331     119.470  44.630  44.160  1.00  0.00           O
ATOM    505  N   THR A 332     120.500  44.440  46.110  1.00  0.00           N
ATOM    506  H   THR A 332     121.330  44.160  46.610  1.00  0.00           H
ATOM    507  CA  THR A 332     119.320  44.090  46.940  1.00  0.00           C
ATOM    508  HA  THR A 332     118.420  44.120  46.330  1.00  0.00           H
ATOM    509  CB  THR A 332     119.450  42.690  47.600  1.00  0.00           C
ATOM    510  HB  THR A 332     118.920  42.580  48.540  1.00  0.00           H
ATOM    511  CG2 THR A 332     118.980  41.650  46.590  1.00  0.00           C
ATOM    512 1HG2 THR A 332     117.960  41.790  46.220  1.00  0.00           H
ATOM    513 2HG2 THR A 332     119.710  41.630  45.780  1.00  0.00           H
ATOM    514 3HG2 THR A 332     118.990  40.650  47.020  1.00  0.00           H
ATOM    515  OG1 THR A 332     120.780  42.350  47.840  1.00  0.00           O
ATOM    516  HG1 THR A 332     120.800  41.440  48.160  1.00  0.00           H
ATOM    517  C   THR A 332     119.110  45.110  48.090  1.00  0.00           C
ATOM    518  O   THR A 332     118.030  45.140  48.680  1.00  0.00           O
ATOM    519  N   GLY A 333     120.140  45.900  48.500  1.00  0.00           N
ATOM    520  H   GLY A 333     121.000  45.960  47.980  1.00  0.00           H
ATOM    521  CA  GLY A 333     120.020  46.670  49.750  1.00  0.00           C
ATOM    522  HA1 GLY A 333     119.520  46.070  50.510  1.00  0.00           H
ATOM    523  HA2 GLY A 333     119.530  47.640  49.630  1.00  0.00           H
ATOM    524  C   GLY A 333     121.440  47.070  50.230  1.00  0.00           C
ATOM    525  O   GLY A 333     122.300  47.480  49.410  1.00  0.00           O
ATOM    526  N   ILE A 334     121.690  46.960  51.550  1.00  0.00           N
ATOM    527  H   ILE A 334     120.990  46.440  52.050  1.00  0.00           H
ATOM    528  CA  ILE A 334     122.940  47.350  52.260  1.00  0.00           C
ATOM    529  HA  ILE A 334     123.710  47.430  51.500  1.00  0.00           H
ATOM    530  CB  ILE A 334     122.800  48.620  53.080  1.00  0.00           C
ATOM    531  HB  ILE A 334     123.770  48.880  53.510  1.00  0.00           H
ATOM    532  CG2 ILE A 334     122.380  49.800  52.180  1.00  0.00           C
ATOM    533 1HG2 ILE A 334     121.300  49.860  52.140  1.00  0.00           H
ATOM    534 2HG2 ILE A 334     122.660  50.760  52.620  1.00  0.00           H
ATOM    535 3HG2 ILE A 334     122.860  49.770  51.200  1.00  0.00           H
ATOM    536  CG1 ILE A 334     121.810  48.420  54.200  1.00  0.00           C
ATOM    537 1HG1 ILE A 334     121.940  47.490  54.750  1.00  0.00           H
ATOM    538 2HG1 ILE A 334     120.790  48.440  53.810  1.00  0.00           H
ATOM    539  CD  ILE A 334     121.990  49.460  55.240  1.00  0.00           C
ATOM    540  HD1 ILE A 334     121.700  49.040  56.200  1.00  0.00           H
ATOM    541  HD2 ILE A 334     123.050  49.720  55.330  1.00  0.00           H
ATOM    542  HD3 ILE A 334     121.540  50.400  54.920  1.00  0.00           H
ATOM    543  C   ILE A 334     123.360  46.190  53.120  1.00  0.00           C
ATOM    544  O   ILE A 334     122.590  45.260  53.410  1.00  0.00           O
ATOM    545  N   VAL A 335     124.660  46.160  53.520  1.00  0.00           N
ATOM    546  H   VAL A 335     125.280  46.840  53.120  1.00  0.00           H
ATOM    547  CA  VAL A 335     125.210  45.190  54.430  1.00  0.00           C
ATOM    548  HA  VAL A 335     124.320  44.690  54.830  1.00  0.00           H
ATOM    549  CB  VAL A 335     126.070  44.150  53.690  1.00  0.00           C
ATOM    550  HB  VAL A 335     127.020  44.630  53.450  1.00  0.00           H
ATOM    551  CG1 VAL A 335     126.270  42.910  54.610  1.00  0.00           C
ATOM    552 1HG1 VAL A 335     126.870  43.200  55.470  1.00  0.00           H
ATOM    553 2HG1 VAL A 335     125.280  42.590  54.940  1.00  0.00           H
ATOM    554 3HG1 VAL A 335     126.770  42.080  54.110  1.00  0.00           H
ATOM    555  CG2 VAL A 335     125.490  43.740  52.330  1.00  0.00           C
ATOM    556 1HG2 VAL A 335     124.510  43.280  52.470  1.00  0.00           H
ATOM    557 2HG2 VAL A 335     125.250  44.540  51.630  1.00  0.00           H
ATOM    558 3HG2 VAL A 335     126.110  43.020  51.790  1.00  0.00           H
ATOM    559  C   VAL A 335     126.070  45.940  55.480  1.00  0.00           C
ATOM    560  O   VAL A 335     126.770  46.930  55.220  1.00  0.00           O
ATOM    561  N   CYS A 336     125.970  45.470  56.740  1.00  0.00           N
ATOM    562  H   CYS A 336     125.340  44.690  56.900  1.00  0.00           H
ATOM    563  CA  CYS A 336     126.440  46.230  57.970  1.00  0.00           C
ATOM    564  HA  CYS A 336     127.160  46.980  57.640  1.00  0.00           H
ATOM    565  CB  CYS A 336     125.180  46.820  58.690  1.00  0.00           C
ATOM    566  HB1 CYS A 336     125.480  47.470  59.520  1.00  0.00           H
ATOM    567  HB2 CYS A 336     124.570  45.970  59.000  1.00  0.00           H
ATOM    568  SG  CYS A 336     124.120  47.680  57.390  1.00  0.00           S
ATOM    569  HG  CYS A 336     124.280  46.750  56.440  1.00  0.00           H
ATOM    570  C   CYS A 336     127.280  45.260  58.800  1.00  0.00           C
ATOM    571  O   CYS A 336     127.220  44.060  58.630  1.00  0.00           O
ATOM    572  N   ILE A 337     127.840  45.800  59.870  1.00  0.00           N
ATOM    573  H   ILE A 337     127.880  46.810  59.860  1.00  0.00           H
ATOM    574  CA  ILE A 337     128.280  45.000  61.110  1.00  0.00           C
ATOM    575  HA  ILE A 337     127.800  44.030  60.980  1.00  0.00           H
ATOM    576  CB  ILE A 337     129.780  44.890  61.270  1.00  0.00           C
ATOM    577  HB  ILE A 337     130.080  44.320  62.150  1.00  0.00           H
ATOM    578  CG2 ILE A 337     130.350  43.940  60.170  1.00  0.00           C
ATOM    579 1HG2 ILE A 337     129.790  43.010  60.200  1.00  0.00           H
ATOM    580 2HG2 ILE A 337     130.270  44.270  59.140  1.00  0.00           H
ATOM    581 3HG2 ILE A 337     131.400  43.670  60.250  1.00  0.00           H
ATOM    582  CG1 ILE A 337     130.550  46.220  61.070  1.00  0.00           C
ATOM    583 1HG1 ILE A 337     129.950  46.870  60.440  1.00  0.00           H
ATOM    584 2HG1 ILE A 337     131.570  46.120  60.710  1.00  0.00           H
ATOM    585  CD  ILE A 337     130.680  46.840  62.490  1.00  0.00           C
ATOM    586  HD1 ILE A 337     129.830  46.610  63.130  1.00  0.00           H
ATOM    587  HD2 ILE A 337     131.470  46.380  63.100  1.00  0.00           H
ATOM    588  HD3 ILE A 337     130.980  47.870  62.310  1.00  0.00           H
ATOM    589  C   ILE A 337     127.470  45.550  62.350  1.00  0.00           C
ATOM    590  O   ILE A 337     126.980  46.660  62.390  1.00  0.00           O
ATOM    591  N   ALA A 338     127.480  44.720  63.410  1.00  0.00           N
ATOM    592  H   ALA A 338     128.060  43.900  63.330  1.00  0.00           H
ATOM    593  CA  ALA A 338     126.830  45.020  64.620  1.00  0.00           C
ATOM    594  HA  ALA A 338     127.090  46.080  64.710  1.00  0.00           H
ATOM    595  CB  ALA A 338     125.350  44.710  64.560  1.00  0.00           C
ATOM    596  HB1 ALA A 338     124.910  44.650  65.560  1.00  0.00           H
ATOM    597  HB2 ALA A 338     124.860  45.500  63.990  1.00  0.00           H
ATOM    598  HB3 ALA A 338     125.240  43.680  64.210  1.00  0.00           H
ATOM    599  C   ALA A 338     127.580  44.270  65.740  1.00  0.00           C
ATOM    600  O   ALA A 338     127.910  43.080  65.700  1.00  0.00           O
ATOM    601  N   THR A 339     127.660  44.950  66.870  1.00  0.00           N
ATOM    602  H   THR A 339     127.230  45.860  66.860  1.00  0.00           H
ATOM    603  CA  THR A 339     128.300  44.300  68.010  1.00  0.00           C
ATOM    604  HA  THR A 339     128.990  43.530  67.670  1.00  0.00           H
ATOM    605  CB  THR A 339     129.120  45.340  68.800  1.00  0.00           C
ATOM    606  HB  THR A 339     128.510  46.180  69.160  1.00  0.00           H
ATOM    607  CG2 THR A 339     129.830  44.790  70.060  1.00  0.00           C
ATOM    608 1HG2 THR A 339     130.520  45.490  70.550  1.00  0.00           H
ATOM    609 2HG2 THR A 339     129.120  44.550  70.850  1.00  0.00           H
ATOM    610 3HG2 THR A 339     130.320  43.860  69.800  1.00  0.00           H
ATOM    611  OG1 THR A 339     130.090  45.960  68.040  1.00  0.00           O
ATOM    612  HG1 THR A 339     129.830  46.360  67.210  1.00  0.00           H
ATOM    613  C   THR A 339     127.180  43.580  68.870  1.00  0.00           C
ATOM    614  O   THR A 339     126.110  44.170  69.130  1.00  0.00           O
ATOM    615  N   VAL A 340     127.520  42.400  69.430  1.00  0.00           N
ATOM    616  H   VAL A 340     128.480  42.120  69.320  1.00  0.00           H
ATOM    617  CA  VAL A 340     126.550  41.510  70.130  1.00  0.00           C
ATOM    618  HA  VAL A 340     125.570  41.590  69.660  1.00  0.00           H
ATOM    619  CB  VAL A 340     126.900  39.980  70.120  1.00  0.00           C
ATOM    620  HB  VAL A 340     127.900  39.860  70.530  1.00  0.00           H
ATOM    621  CG1 VAL A 340     125.760  39.170  70.740  1.00  0.00           C
ATOM    622 1HG1 VAL A 340     125.630  39.520  71.760  1.00  0.00           H
ATOM    623 2HG1 VAL A 340     124.800  39.290  70.240  1.00  0.00           H
ATOM    624 3HG1 VAL A 340     126.130  38.140  70.680  1.00  0.00           H
ATOM    625  CG2 VAL A 340     127.080  39.440  68.680  1.00  0.00           C
ATOM    626 1HG2 VAL A 340     127.650  40.160  68.090  1.00  0.00           H
ATOM    627 2HG2 VAL A 340     127.640  38.510  68.600  1.00  0.00           H
ATOM    628 3HG2 VAL A 340     126.070  39.440  68.270  1.00  0.00           H
ATOM    629  C   VAL A 340     126.310  41.900  71.620  1.00  0.00           C
ATOM    630  O   VAL A 340     127.210  42.220  72.360  1.00  0.00           O
ATOM    631  N   ARG A 341     125.060  41.980  72.000  1.00  0.00           N
ATOM    632  H   ARG A 341     124.320  41.700  71.380  1.00  0.00           H
ATOM    633  CA  ARG A 341     124.610  42.660  73.260  1.00  0.00           C
ATOM    634  HA  ARG A 341     125.070  43.630  73.460  1.00  0.00           H
ATOM    635  CB  ARG A 341     123.050  42.980  73.230  1.00  0.00           C
ATOM    636  HB1 ARG A 341     122.710  43.280  74.220  1.00  0.00           H
ATOM    637  HB2 ARG A 341     122.510  42.150  72.780  1.00  0.00           H
ATOM    638  CG  ARG A 341     122.770  44.220  72.420  1.00  0.00           C
ATOM    639  HG1 ARG A 341     123.110  44.200  71.390  1.00  0.00           H
ATOM    640  HG2 ARG A 341     123.360  44.940  72.990  1.00  0.00           H
ATOM    641  CD  ARG A 341     121.320  44.770  72.590  1.00  0.00           C
ATOM    642  HD1 ARG A 341     121.110  45.250  73.540  1.00  0.00           H
ATOM    643  HD2 ARG A 341     120.600  43.950  72.550  1.00  0.00           H
ATOM    644  NE  ARG A 341     120.860  45.670  71.520  1.00  0.00           N
ATOM    645  HE  ARG A 341     120.800  45.300  70.580  1.00  0.00           H
ATOM    646  CZ  ARG A 341     120.810  46.980  71.530  1.00  0.00           C
ATOM    647  NH1 ARG A 341     120.990  47.700  72.610  1.00  0.00           N
ATOM    648 1HH1 ARG A 341     121.190  47.250  73.490  1.00  0.00           H
ATOM    649 2HH1 ARG A 341     120.970  48.710  72.550  1.00  0.00           H
ATOM    650  NH2 ARG A 341     120.540  47.540  70.450  1.00  0.00           N
ATOM    651 1HH2 ARG A 341     120.270  46.960  69.670  1.00  0.00           H
ATOM    652 2HH2 ARG A 341     120.720  48.520  70.310  1.00  0.00           H
ATOM    653  C   ARG A 341     125.000  41.780  74.500  1.00  0.00           C
ATOM    654  O   ARG A 341     124.910  40.540  74.410  1.00  0.00           O
ATOM    655  N   SER A 342     125.500  42.510  75.540  1.00  0.00           N
ATOM    656  H   SER A 342     125.580  43.510  75.460  1.00  0.00           H
ATOM    657  CA  SER A 342     126.320  41.910  76.600  1.00  0.00           C
ATOM    658  HA  SER A 342     126.480  42.760  77.270  1.00  0.00           H
ATOM    659  CB  SER A 342     125.550  40.860  77.460  1.00  0.00           C
ATOM    660  HB1 SER A 342     126.180  40.490  78.280  1.00  0.00           H
ATOM    661  HB2 SER A 342     125.300  39.920  76.970  1.00  0.00           H
ATOM    662  OG  SER A 342     124.410  41.350  78.020  1.00  0.00           O
ATOM    663  HG  SER A 342     123.730  40.960  77.460  1.00  0.00           H
ATOM    664  C   SER A 342     127.780  41.420  76.190  1.00  0.00           C
ATOM    665  O   SER A 342     128.480  40.840  76.980  1.00  0.00           O
ATOM    666  N   SER A 343     128.230  41.620  74.930  1.00  0.00           N
ATOM    667  H   SER A 343     127.620  42.100  74.290  1.00  0.00           H
ATOM    668  CA  SER A 343     129.500  41.210  74.340  1.00  0.00           C
ATOM    669  HA  SER A 343     130.090  40.690  75.090  1.00  0.00           H
ATOM    670  CB  SER A 343     129.260  40.020  73.430  1.00  0.00           C
ATOM    671  HB1 SER A 343     128.740  40.370  72.530  1.00  0.00           H
ATOM    672  HB2 SER A 343     128.720  39.410  74.140  1.00  0.00           H
ATOM    673  OG  SER A 343     130.350  39.240  73.040  1.00  0.00           O
ATOM    674  HG  SER A 343     130.110  38.440  72.560  1.00  0.00           H
ATOM    675  C   SER A 343     130.310  42.320  73.610  1.00  0.00           C
ATOM    676  O   SER A 343     129.920  43.520  73.540  1.00  0.00           O
ATOM    677  N   GLY A 344     131.520  41.940  73.160  1.00  0.00           N
ATOM    678  H   GLY A 344     131.820  41.010  73.390  1.00  0.00           H
ATOM    679  CA  GLY A 344     132.410  42.730  72.350  1.00  0.00           C
ATOM    680  HA1 GLY A 344     133.320  42.850  72.930  1.00  0.00           H
ATOM    681  HA2 GLY A 344     132.060  43.760  72.240  1.00  0.00           H
ATOM    682  C   GLY A 344     132.590  42.120  70.950  1.00  0.00           C
ATOM    683  O   GLY A 344     133.230  42.760  70.120  1.00  0.00           O
ATOM    684  N   LYS A 345     132.040  40.940  70.660  1.00  0.00           N
ATOM    685  H   LYS A 345     131.390  40.610  71.360  1.00  0.00           H
ATOM    686  CA  LYS A 345     132.040  40.240  69.370  1.00  0.00           C
ATOM    687  HA  LYS A 345     133.100  40.200  69.110  1.00  0.00           H
ATOM    688  CB  LYS A 345     131.580  38.750  69.590  1.00  0.00           C
ATOM    689  HB1 LYS A 345     131.170  38.270  68.690  1.00  0.00           H
ATOM    690  HB2 LYS A 345     130.700  38.870  70.230  1.00  0.00           H
ATOM    691  CG  LYS A 345     132.710  37.920  70.190  1.00  0.00           C
ATOM    692  HG1 LYS A 345     132.990  38.340  71.150  1.00  0.00           H
ATOM    693  HG2 LYS A 345     133.620  37.920  69.580  1.00  0.00           H
ATOM    694  CD  LYS A 345     132.380  36.410  70.520  1.00  0.00           C
ATOM    695  HD1 LYS A 345     131.980  35.920  69.630  1.00  0.00           H
ATOM    696  HD2 LYS A 345     131.640  36.410  71.320  1.00  0.00           H
ATOM    697  CE  LYS A 345     133.630  35.740  71.050  1.00  0.00           C
ATOM    698  HE1 LYS A 345     134.100  36.210  71.910  1.00  0.00           H
ATOM    699  HE2 LYS A 345     134.370  35.900  70.270  1.00  0.00           H
ATOM    700  NZ  LYS A 345     133.350  34.410  71.480  1.00  0.00           N
ATOM    701  HZ1 LYS A 345     134.170  34.000  71.900  1.00  0.00           H
ATOM    702  HZ2 LYS A 345     132.590  34.280  72.130  1.00  0.00           H
ATOM    703  HZ3 LYS A 345     133.110  33.810  70.700  1.00  0.00           H
ATOM    704  C   LYS A 345     131.180  40.970  68.310  1.00  0.00           C
ATOM    705  O   LYS A 345     130.150  41.540  68.610  1.00  0.00           O
ATOM    706  N   LEU A 346     131.620  40.820  67.070  1.00  0.00           N
ATOM    707  H   LEU A 346     132.300  40.100  66.900  1.00  0.00           H
ATOM    708  CA  LEU A 346     130.810  41.240  65.860  1.00  0.00           C
ATOM    709  HA  LEU A 346     130.110  42.010  66.200  1.00  0.00           H
ATOM    710  CB  LEU A 346     131.700  41.890  64.820  1.00  0.00           C
ATOM    711  HB1 LEU A 346     131.160  41.790  63.880  1.00  0.00           H
ATOM    712  HB2 LEU A 346     132.650  41.360  64.770  1.00  0.00           H
ATOM    713  CG  LEU A 346     131.990  43.330  65.000  1.00  0.00           C
ATOM    714  HG  LEU A 346     131.010  43.770  64.800  1.00  0.00           H
ATOM    715  CD1 LEU A 346     132.670  43.750  66.300  1.00  0.00           C
ATOM    716 1HD1 LEU A 346     133.600  43.220  66.530  1.00  0.00           H
ATOM    717 2HD1 LEU A 346     132.940  44.800  66.230  1.00  0.00           H
ATOM    718 3HD1 LEU A 346     132.000  43.680  67.150  1.00  0.00           H
ATOM    719  CD2 LEU A 346     132.840  43.780  63.840  1.00  0.00           C
ATOM    720 1HD2 LEU A 346     132.990  44.860  63.750  1.00  0.00           H
ATOM    721 2HD2 LEU A 346     133.790  43.290  64.020  1.00  0.00           H
ATOM    722 3HD2 LEU A 346     132.520  43.320  62.900  1.00  0.00           H
ATOM    723  C   LEU A 346     129.960  40.110  65.280  1.00  0.00           C
ATOM    724  O   LEU A 346     130.300  38.920  65.380  1.00  0.00           O
ATOM    725  N   VAL A 347     128.940  40.510  64.500  1.00  0.00           N
ATOM    726  H   VAL A 347     128.730  41.490  64.560  1.00  0.00           H
ATOM    727  CA  VAL A 347     128.240  39.820  63.310  1.00  0.00           C
ATOM    728  HA  VAL A 347     128.930  39.000  63.110  1.00  0.00           H
ATOM    729  CB  VAL A 347     126.800  39.370  63.620  1.00  0.00           C
ATOM    730  HB  VAL A 347     126.380  38.990  62.690  1.00  0.00           H
ATOM    731  CG1 VAL A 347     126.780  38.140  64.580  1.00  0.00           C
ATOM    732 1HG1 VAL A 347     127.380  37.350  64.140  1.00  0.00           H
ATOM    733 2HG1 VAL A 347     127.330  38.440  65.460  1.00  0.00           H
ATOM    734 3HG1 VAL A 347     125.740  37.800  64.680  1.00  0.00           H
ATOM    735  CG2 VAL A 347     125.950  40.580  64.110  1.00  0.00           C
ATOM    736 1HG2 VAL A 347     125.970  41.450  63.450  1.00  0.00           H
ATOM    737 2HG2 VAL A 347     124.920  40.230  64.190  1.00  0.00           H
ATOM    738 3HG2 VAL A 347     126.270  40.820  65.130  1.00  0.00           H
ATOM    739  C   VAL A 347     128.190  40.730  62.060  1.00  0.00           C
ATOM    740  O   VAL A 347     128.280  41.950  62.170  1.00  0.00           O
ATOM    741  N   ALA A 348     128.000  40.230  60.840  1.00  0.00           N
ATOM    742  H   ALA A 348     127.860  39.240  60.760  1.00  0.00           H
ATOM    743  CA  ALA A 348     127.610  40.910  59.610  1.00  0.00           C
ATOM    744  HA  ALA A 348     127.800  41.980  59.660  1.00  0.00           H
ATOM    745  CB  ALA A 348     128.330  40.270  58.420  1.00  0.00           C
ATOM    746  HB1 ALA A 348     129.390  40.150  58.640  1.00  0.00           H
ATOM    747  HB2 ALA A 348     127.880  39.310  58.190  1.00  0.00           H
ATOM    748  HB3 ALA A 348     128.390  40.960  57.580  1.00  0.00           H
ATOM    749  C   ALA A 348     126.090  40.760  59.470  1.00  0.00           C
ATOM    750  O   ALA A 348     125.530  39.790  59.880  1.00  0.00           O
ATOM    751  N   VAL A 349     125.410  41.790  59.010  1.00  0.00           N
ATOM    752  H   VAL A 349     125.970  42.590  58.730  1.00  0.00           H
ATOM    753  CA  VAL A 349     124.030  41.790  58.930  1.00  0.00           C
ATOM    754  HA  VAL A 349     123.650  40.760  58.930  1.00  0.00           H
ATOM    755  CB  VAL A 349     123.520  42.630  60.110  1.00  0.00           C
ATOM    756  HB  VAL A 349     123.880  43.670  60.100  1.00  0.00           H
ATOM    757  CG1 VAL A 349     121.940  42.700  59.980  1.00  0.00           C
ATOM    758 1HG1 VAL A 349     121.560  43.070  60.930  1.00  0.00           H
ATOM    759 2HG1 VAL A 349     121.650  43.320  59.130  1.00  0.00           H
ATOM    760 3HG1 VAL A 349     121.520  41.750  59.650  1.00  0.00           H
ATOM    761  CG2 VAL A 349     123.760  42.020  61.510  1.00  0.00           C
ATOM    762 1HG2 VAL A 349     124.720  41.500  61.560  1.00  0.00           H
ATOM    763 2HG2 VAL A 349     123.820  42.840  62.230  1.00  0.00           H
ATOM    764 3HG2 VAL A 349     123.130  41.210  61.880  1.00  0.00           H
ATOM    765  C   VAL A 349     123.660  42.490  57.600  1.00  0.00           C
ATOM    766  O   VAL A 349     124.000  43.630  57.310  1.00  0.00           O
ATOM    767  N   LYS A 350     122.930  41.770  56.840  1.00  0.00           N
ATOM    768  H   LYS A 350     122.570  40.900  57.190  1.00  0.00           H
ATOM    769  CA  LYS A 350     122.290  42.240  55.550  1.00  0.00           C
ATOM    770  HA  LYS A 350     122.920  43.030  55.120  1.00  0.00           H
ATOM    771  CB  LYS A 350     122.220  41.010  54.540  1.00  0.00           C
ATOM    772  HB1 LYS A 350     121.610  41.340  53.700  1.00  0.00           H
ATOM    773  HB2 LYS A 350     121.790  40.180  55.100  1.00  0.00           H
ATOM    774  CG  LYS A 350     123.530  40.600  53.950  1.00  0.00           C
ATOM    775  HG1 LYS A 350     124.280  40.430  54.730  1.00  0.00           H
ATOM    776  HG2 LYS A 350     123.820  41.440  53.320  1.00  0.00           H
ATOM    777  CD  LYS A 350     123.380  39.460  53.030  1.00  0.00           C
ATOM    778  HD1 LYS A 350     122.960  38.690  53.690  1.00  0.00           H
ATOM    779  HD2 LYS A 350     124.360  39.090  52.750  1.00  0.00           H
ATOM    780  CE  LYS A 350     122.650  39.720  51.730  1.00  0.00           C
ATOM    781  HE1 LYS A 350     123.220  40.580  51.370  1.00  0.00           H
ATOM    782  HE2 LYS A 350     121.600  39.950  51.900  1.00  0.00           H
ATOM    783  NZ  LYS A 350     122.610  38.600  50.790  1.00  0.00           N
ATOM    784  HZ1 LYS A 350     122.450  38.890  49.830  1.00  0.00           H
ATOM    785  HZ2 LYS A 350     123.480  38.080  50.720  1.00  0.00           H
ATOM    786  HZ3 LYS A 350     121.900  37.910  50.990  1.00  0.00           H
ATOM    787  C   LYS A 350     120.930  42.880  55.830  1.00  0.00           C
ATOM    788  O   LYS A 350     120.170  42.520  56.710  1.00  0.00           O
ATOM    789  N   LYS A 351     120.530  43.870  54.990  1.00  0.00           N
ATOM    790  H   LYS A 351     121.250  44.250  54.390  1.00  0.00           H
ATOM    791  CA  LYS A 351     119.220  44.520  55.040  1.00  0.00           C
ATOM    792  HA  LYS A 351     118.490  43.780  55.380  1.00  0.00           H
ATOM    793  CB  LYS A 351     119.070  45.790  56.020  1.00  0.00           C
ATOM    794  HB1 LYS A 351     118.010  46.040  56.010  1.00  0.00           H
ATOM    795  HB2 LYS A 351     119.570  46.700  55.690  1.00  0.00           H
ATOM    796  CG  LYS A 351     119.460  45.490  57.510  1.00  0.00           C
ATOM    797  HG1 LYS A 351     120.500  45.230  57.720  1.00  0.00           H
ATOM    798  HG2 LYS A 351     118.810  44.670  57.810  1.00  0.00           H
ATOM    799  CD  LYS A 351     119.070  46.710  58.340  1.00  0.00           C
ATOM    800  HD1 LYS A 351     118.000  46.910  58.330  1.00  0.00           H
ATOM    801  HD2 LYS A 351     119.720  47.540  58.060  1.00  0.00           H
ATOM    802  CE  LYS A 351     119.520  46.560  59.760  1.00  0.00           C
ATOM    803  HE1 LYS A 351     120.610  46.440  59.750  1.00  0.00           H
ATOM    804  HE2 LYS A 351     118.950  45.790  60.270  1.00  0.00           H
ATOM    805  NZ  LYS A 351     119.340  47.780  60.490  1.00  0.00           N
ATOM    806  HZ1 LYS A 351     119.910  48.560  60.170  1.00  0.00           H
ATOM    807  HZ2 LYS A 351     118.360  48.020  60.490  1.00  0.00           H
ATOM    808  HZ3 LYS A 351     119.580  47.670  61.470  1.00  0.00           H
ATOM    809  C   LYS A 351     118.840  44.830  53.580  1.00  0.00           C
ATOM    810  O   LYS A 351     119.320  45.730  52.920  1.00  0.00           O
ATOM    811  N   MET A 352     117.920  44.020  53.050  1.00  0.00           N
ATOM    812  H   MET A 352     117.500  43.320  53.650  1.00  0.00           H
ATOM    813  CA  MET A 352     117.470  44.050  51.700  1.00  0.00           C
ATOM    814  HA  MET A 352     118.140  44.690  51.130  1.00  0.00           H
ATOM    815  CB  MET A 352     117.610  42.640  51.130  1.00  0.00           C
ATOM    816  HB1 MET A 352     117.290  42.610  50.080  1.00  0.00           H
ATOM    817  HB2 MET A 352     116.930  41.970  51.650  1.00  0.00           H
ATOM    818  CG  MET A 352     118.930  42.020  51.040  1.00  0.00           C
ATOM    819  HG1 MET A 352     119.430  42.170  52.000  1.00  0.00           H
ATOM    820  HG2 MET A 352     119.610  42.590  50.410  1.00  0.00           H
ATOM    821  SD  MET A 352     119.110  40.370  50.470  1.00  0.00           S
ATOM    822  CE  MET A 352     118.600  39.520  51.960  1.00  0.00           C
ATOM    823  HE1 MET A 352     118.440  38.470  51.700  1.00  0.00           H
ATOM    824  HE2 MET A 352     119.450  39.500  52.630  1.00  0.00           H
ATOM    825  HE3 MET A 352     117.720  39.970  52.420  1.00  0.00           H
ATOM    826  C   MET A 352     116.070  44.670  51.590  1.00  0.00           C
ATOM    827  O   MET A 352     115.210  44.460  52.410  1.00  0.00           O
ATOM    828  N   ASP A 353     115.770  45.330  50.450  1.00  0.00           N
ATOM    829  H   ASP A 353     116.530  45.550  49.830  1.00  0.00           H
ATOM    830  CA  ASP A 353     114.480  45.890  50.110  1.00  0.00           C
ATOM    831  HA  ASP A 353     114.160  46.380  51.030  1.00  0.00           H
ATOM    832  CB  ASP A 353     114.740  46.990  49.040  1.00  0.00           C
ATOM    833  HB1 ASP A 353     115.240  46.590  48.160  1.00  0.00           H
ATOM    834  HB2 ASP A 353     115.420  47.730  49.470  1.00  0.00           H
ATOM    835  CG  ASP A 353     113.480  47.640  48.400  1.00  0.00           C
ATOM    836  OD1 ASP A 353     113.340  47.690  47.170  1.00  0.00           O
ATOM    837  OD2 ASP A 353     112.620  48.170  49.160  1.00  0.00           O
ATOM    838  C   ASP A 353     113.350  44.900  49.620  1.00  0.00           C
ATOM    839  O   ASP A 353     113.530  43.860  48.910  1.00  0.00           O
ATOM    840  N   LEU A 354     112.130  45.410  49.740  1.00  0.00           N
ATOM    841  H   LEU A 354     112.050  46.310  50.190  1.00  0.00           H
ATOM    842  CA  LEU A 354     110.870  44.830  49.320  1.00  0.00           C
ATOM    843  HA  LEU A 354     111.000  43.970  48.660  1.00  0.00           H
ATOM    844  CB  LEU A 354     110.110  44.280  50.550  1.00  0.00           C
ATOM    845  HB1 LEU A 354     109.220  43.730  50.240  1.00  0.00           H
ATOM    846  HB2 LEU A 354     109.820  45.000  51.310  1.00  0.00           H
ATOM    847  CG  LEU A 354     111.050  43.320  51.340  1.00  0.00           C
ATOM    848  HG  LEU A 354     112.080  43.660  51.490  1.00  0.00           H
ATOM    849  CD1 LEU A 354     110.470  42.970  52.720  1.00  0.00           C
ATOM    850 1HD1 LEU A 354     109.550  42.400  52.560  1.00  0.00           H
ATOM    851 2HD1 LEU A 354     111.200  42.660  53.470  1.00  0.00           H
ATOM    852 3HD1 LEU A 354     110.100  43.900  53.150  1.00  0.00           H
ATOM    853  CD2 LEU A 354     111.190  42.000  50.700  1.00  0.00           C
ATOM    854 1HD2 LEU A 354     111.830  42.010  49.820  1.00  0.00           H
ATOM    855 2HD2 LEU A 354     111.640  41.280  51.380  1.00  0.00           H
ATOM    856 3HD2 LEU A 354     110.230  41.550  50.420  1.00  0.00           H
ATOM    857  C   LEU A 354     109.890  45.760  48.580  1.00  0.00           C
ATOM    858  O   LEU A 354     108.830  45.270  48.230  1.00  0.00           O
ATOM    859  N   ARG A 355     110.290  46.990  48.190  1.00  0.00           N
ATOM    860  H   ARG A 355     111.240  47.260  48.410  1.00  0.00           H
ATOM    861  CA  ARG A 355     109.380  48.030  47.670  1.00  0.00           C
ATOM    862  HA  ARG A 355     108.340  47.710  47.590  1.00  0.00           H
ATOM    863  CB  ARG A 355     109.330  49.270  48.490  1.00  0.00           C
ATOM    864  HB1 ARG A 355     108.390  49.770  48.240  1.00  0.00           H
ATOM    865  HB2 ARG A 355     110.200  49.860  48.190  1.00  0.00           H
ATOM    866  CG  ARG A 355     109.340  49.120  50.040  1.00  0.00           C
ATOM    867  HG1 ARG A 355     110.290  48.720  50.400  1.00  0.00           H
ATOM    868  HG2 ARG A 355     108.540  48.420  50.270  1.00  0.00           H
ATOM    869  CD  ARG A 355     109.030  50.480  50.670  1.00  0.00           C
ATOM    870  HD1 ARG A 355     109.150  50.480  51.750  1.00  0.00           H
ATOM    871  HD2 ARG A 355     107.970  50.710  50.540  1.00  0.00           H
ATOM    872  NE  ARG A 355     109.780  51.540  50.100  1.00  0.00           N
ATOM    873  HE  ARG A 355     110.720  51.670  50.440  1.00  0.00           H
ATOM    874  CZ  ARG A 355     109.450  52.450  49.240  1.00  0.00           C
ATOM    875  NH1 ARG A 355     110.350  53.280  48.890  1.00  0.00           N
ATOM    876 1HH1 ARG A 355     111.260  53.170  49.320  1.00  0.00           H
ATOM    877 2HH1 ARG A 355     109.990  54.170  48.590  1.00  0.00           H
ATOM    878  NH2 ARG A 355     108.280  52.740  48.800  1.00  0.00           N
ATOM    879 1HH2 ARG A 355     107.550  52.190  49.220  1.00  0.00           H
ATOM    880 2HH2 ARG A 355     108.030  53.470  48.150  1.00  0.00           H
ATOM    881  C   ARG A 355     109.690  48.340  46.180  1.00  0.00           C
ATOM    882  O   ARG A 355     108.770  48.770  45.420  1.00  0.00           O
ATOM    883  N   LYS A 356     110.990  48.320  45.860  1.00  0.00           N
ATOM    884  H   LYS A 356     111.710  48.030  46.510  1.00  0.00           H
ATOM    885  CA  LYS A 356     111.480  48.780  44.590  1.00  0.00           C
ATOM    886  HA  LYS A 356     110.680  48.860  43.850  1.00  0.00           H
ATOM    887  CB  LYS A 356     111.990  50.230  44.730  1.00  0.00           C
ATOM    888  HB1 LYS A 356     112.740  50.480  43.980  1.00  0.00           H
ATOM    889  HB2 LYS A 356     112.580  50.300  45.640  1.00  0.00           H
ATOM    890  CG  LYS A 356     110.910  51.330  44.810  1.00  0.00           C
ATOM    891  HG1 LYS A 356     110.100  51.000  45.460  1.00  0.00           H
ATOM    892  HG2 LYS A 356     110.410  51.490  43.850  1.00  0.00           H
ATOM    893  CD  LYS A 356     111.400  52.740  45.250  1.00  0.00           C
ATOM    894  HD1 LYS A 356     111.410  52.860  46.340  1.00  0.00           H
ATOM    895  HD2 LYS A 356     110.650  53.410  44.840  1.00  0.00           H
ATOM    896  CE  LYS A 356     112.840  52.990  44.670  1.00  0.00           C
ATOM    897  HE1 LYS A 356     112.710  52.740  43.620  1.00  0.00           H
ATOM    898  HE2 LYS A 356     113.660  52.350  44.980  1.00  0.00           H
ATOM    899  NZ  LYS A 356     113.220  54.440  44.640  1.00  0.00           N
ATOM    900  HZ1 LYS A 356     114.060  54.590  44.100  1.00  0.00           H
ATOM    901  HZ2 LYS A 356     112.510  55.040  44.240  1.00  0.00           H
ATOM    902  HZ3 LYS A 356     113.260  54.850  45.560  1.00  0.00           H
ATOM    903  C   LYS A 356     112.490  47.860  43.890  1.00  0.00           C
ATOM    904  O   LYS A 356     112.730  48.080  42.690  1.00  0.00           O
ATOM    905  N   GLN A 357     113.040  46.790  44.470  1.00  0.00           N
ATOM    906  H   GLN A 357     113.080  46.870  45.480  1.00  0.00           H
ATOM    907  CA  GLN A 357     114.140  45.990  43.890  1.00  0.00           C
ATOM    908  HA  GLN A 357     114.590  46.500  43.040  1.00  0.00           H
ATOM    909  CB  GLN A 357     115.420  45.910  44.750  1.00  0.00           C
ATOM    910  HB1 GLN A 357     115.780  46.900  45.000  1.00  0.00           H
ATOM    911  HB2 GLN A 357     116.230  45.450  44.170  1.00  0.00           H
ATOM    912  CG  GLN A 357     115.220  45.010  46.000  1.00  0.00           C
ATOM    913  HG1 GLN A 357     114.220  45.230  46.380  1.00  0.00           H
ATOM    914  HG2 GLN A 357     116.030  45.270  46.690  1.00  0.00           H
ATOM    915  CD  GLN A 357     115.480  43.490  45.890  1.00  0.00           C
ATOM    916  OE1 GLN A 357     115.880  42.970  44.860  1.00  0.00           O
ATOM    917  NE2 GLN A 357     115.220  42.740  46.970  1.00  0.00           N
ATOM    918 1HE2 GLN A 357     114.760  43.250  47.720  1.00  0.00           H
ATOM    919 2HE2 GLN A 357     115.410  41.750  46.960  1.00  0.00           H
ATOM    920  C   GLN A 357     113.700  44.570  43.470  1.00  0.00           C
ATOM    921  O   GLN A 357     112.760  44.000  44.050  1.00  0.00           O
ATOM    922  N   GLN A 358     114.310  43.970  42.440  1.00  0.00           N
ATOM    923  H   GLN A 358     115.120  44.420  42.050  1.00  0.00           H
ATOM    924  CA  GLN A 358     113.810  42.950  41.540  1.00  0.00           C
ATOM    925  HA  GLN A 358     112.750  42.810  41.740  1.00  0.00           H
ATOM    926  CB  GLN A 358     113.880  43.540  40.090  1.00  0.00           C
ATOM    927  HB1 GLN A 358     113.540  42.810  39.350  1.00  0.00           H
ATOM    928  HB2 GLN A 358     114.970  43.610  40.030  1.00  0.00           H
ATOM    929  CG  GLN A 358     113.270  44.900  39.760  1.00  0.00           C
ATOM    930  HG1 GLN A 358     113.420  45.190  38.720  1.00  0.00           H
ATOM    931  HG2 GLN A 358     113.770  45.670  40.340  1.00  0.00           H
ATOM    932  CD  GLN A 358     111.780  45.050  40.000  1.00  0.00           C
ATOM    933  OE1 GLN A 358     111.020  44.070  39.960  1.00  0.00           O
ATOM    934  NE2 GLN A 358     111.330  46.290  40.090  1.00  0.00           N
ATOM    935 1HE2 GLN A 358     111.940  47.080  39.910  1.00  0.00           H
ATOM    936 2HE2 GLN A 358     110.340  46.450  40.240  1.00  0.00           H
ATOM    937  C   GLN A 358     114.580  41.560  41.680  1.00  0.00           C
ATOM    938  O   GLN A 358     114.650  40.780  40.740  1.00  0.00           O
ATOM    939  N   ARG A 359     114.920  41.220  42.860  1.00  0.00           N
ATOM    940  H   ARG A 359     114.840  42.060  43.400  1.00  0.00           H
ATOM    941  CA  ARG A 359     114.970  39.930  43.490  1.00  0.00           C
ATOM    942  HA  ARG A 359     114.810  39.160  42.730  1.00  0.00           H
ATOM    943  CB  ARG A 359     116.420  39.660  43.940  1.00  0.00           C
ATOM    944  HB1 ARG A 359     116.470  38.640  44.310  1.00  0.00           H
ATOM    945  HB2 ARG A 359     116.600  40.350  44.770  1.00  0.00           H
ATOM    946  CG  ARG A 359     117.450  39.690  42.740  1.00  0.00           C
ATOM    947  HG1 ARG A 359     117.490  40.680  42.280  1.00  0.00           H
ATOM    948  HG2 ARG A 359     117.220  39.030  41.900  1.00  0.00           H
ATOM    949  CD  ARG A 359     118.870  39.330  43.310  1.00  0.00           C
ATOM    950  HD1 ARG A 359     118.840  38.360  43.790  1.00  0.00           H
ATOM    951  HD2 ARG A 359     119.100  40.010  44.130  1.00  0.00           H
ATOM    952  NE  ARG A 359     119.930  39.260  42.280  1.00  0.00           N
ATOM    953  HE  ARG A 359     119.790  39.780  41.430  1.00  0.00           H
ATOM    954  CZ  ARG A 359     121.150  38.780  42.410  1.00  0.00           C
ATOM    955  NH1 ARG A 359     122.070  38.920  41.480  1.00  0.00           N
ATOM    956 1HH1 ARG A 359     121.820  39.410  40.640  1.00  0.00           H
ATOM    957 2HH1 ARG A 359     122.990  38.510  41.610  1.00  0.00           H
ATOM    958  NH2 ARG A 359     121.470  38.160  43.460  1.00  0.00           N
ATOM    959 1HH2 ARG A 359     120.890  37.720  44.170  1.00  0.00           H
ATOM    960 2HH2 ARG A 359     122.420  37.810  43.420  1.00  0.00           H
ATOM    961  C   ARG A 359     113.900  39.740  44.640  1.00  0.00           C
ATOM    962  O   ARG A 359     113.940  38.790  45.270  1.00  0.00           O
ATOM    963  N   ARG A 360     113.000  40.730  44.960  1.00  0.00           N
ATOM    964  H   ARG A 360     112.830  41.450  44.270  1.00  0.00           H
ATOM    965  CA  ARG A 360     112.020  40.680  46.110  1.00  0.00           C
ATOM    966  HA  ARG A 360     112.630  40.530  47.000  1.00  0.00           H
ATOM    967  CB  ARG A 360     111.290  41.980  46.270  1.00  0.00           C
ATOM    968  HB1 ARG A 360     112.060  42.750  46.280  1.00  0.00           H
ATOM    969  HB2 ARG A 360     110.870  42.060  47.270  1.00  0.00           H
ATOM    970  CG  ARG A 360     110.280  42.240  45.090  1.00  0.00           C
ATOM    971  HG1 ARG A 360     109.510  41.470  45.140  1.00  0.00           H
ATOM    972  HG2 ARG A 360     110.800  42.310  44.130  1.00  0.00           H
ATOM    973  CD  ARG A 360     109.610  43.580  45.290  1.00  0.00           C
ATOM    974  HD1 ARG A 360     110.270  44.340  44.890  1.00  0.00           H
ATOM    975  HD2 ARG A 360     109.500  43.830  46.350  1.00  0.00           H
ATOM    976  NE  ARG A 360     108.430  43.710  44.520  1.00  0.00           N
ATOM    977  HE  ARG A 360     108.370  43.370  43.570  1.00  0.00           H
ATOM    978  CZ  ARG A 360     107.290  44.260  44.910  1.00  0.00           C
ATOM    979  NH1 ARG A 360     107.230  45.050  45.880  1.00  0.00           N
ATOM    980 1HH1 ARG A 360     108.030  45.250  46.470  1.00  0.00           H
ATOM    981 2HH1 ARG A 360     106.350  45.470  46.140  1.00  0.00           H
ATOM    982  NH2 ARG A 360     106.130  44.030  44.270  1.00  0.00           N
ATOM    983 1HH2 ARG A 360     106.120  43.350  43.530  1.00  0.00           H
ATOM    984 2HH2 ARG A 360     105.240  44.410  44.580  1.00  0.00           H
ATOM    985  C   ARG A 360     111.160  39.410  46.190  1.00  0.00           C
ATOM    986  O   ARG A 360     111.070  38.980  47.350  1.00  0.00           O
ATOM    987  N   GLU A 361     110.780  38.800  45.080  1.00  0.00           N
ATOM    988  H   GLU A 361     111.050  39.320  44.260  1.00  0.00           H
ATOM    989  CA  GLU A 361     110.060  37.540  44.940  1.00  0.00           C
ATOM    990  HA  GLU A 361     109.400  37.380  45.790  1.00  0.00           H
ATOM    991  CB  GLU A 361     109.180  37.610  43.660  1.00  0.00           C
ATOM    992  HB1 GLU A 361     108.680  36.640  43.660  1.00  0.00           H
ATOM    993  HB2 GLU A 361     109.820  37.650  42.780  1.00  0.00           H
ATOM    994  CG  GLU A 361     108.110  38.650  43.720  1.00  0.00           C
ATOM    995  HG1 GLU A 361     108.520  39.650  43.870  1.00  0.00           H
ATOM    996  HG2 GLU A 361     107.540  38.420  44.630  1.00  0.00           H
ATOM    997  CD  GLU A 361     107.180  38.650  42.480  1.00  0.00           C
ATOM    998  OE1 GLU A 361     106.880  37.580  41.850  1.00  0.00           O
ATOM    999  OE2 GLU A 361     106.590  39.740  42.170  1.00  0.00           O
ATOM   1000  C   GLU A 361     111.060  36.340  44.850  1.00  0.00           C
ATOM   1001  O   GLU A 361     110.700  35.230  44.420  1.00  0.00           O
ATOM   1002  N   LEU A 362     112.320  36.510  45.440  1.00  0.00           N
ATOM   1003  H   LEU A 362     112.470  37.450  45.780  1.00  0.00           H
ATOM   1004  CA  LEU A 362     113.300  35.500  45.450  1.00  0.00           C
ATOM   1005  HA  LEU A 362     112.820  34.530  45.290  1.00  0.00           H
ATOM   1006  CB  LEU A 362     114.220  35.550  44.180  1.00  0.00           C
ATOM   1007  HB1 LEU A 362     115.030  34.870  44.410  1.00  0.00           H
ATOM   1008  HB2 LEU A 362     114.760  36.500  44.120  1.00  0.00           H
ATOM   1009  CG  LEU A 362     113.690  35.130  42.760  1.00  0.00           C
ATOM   1010  HG  LEU A 362     112.790  35.690  42.500  1.00  0.00           H
ATOM   1011  CD1 LEU A 362     114.780  35.530  41.740  1.00  0.00           C
ATOM   1012 1HD1 LEU A 362     114.290  35.330  40.790  1.00  0.00           H
ATOM   1013 2HD1 LEU A 362     115.060  36.580  41.850  1.00  0.00           H
ATOM   1014 3HD1 LEU A 362     115.640  34.880  41.920  1.00  0.00           H
ATOM   1015  CD2 LEU A 362     113.320  33.700  42.540  1.00  0.00           C
ATOM   1016 1HD2 LEU A 362     112.800  33.560  41.600  1.00  0.00           H
ATOM   1017 2HD2 LEU A 362     114.280  33.190  42.420  1.00  0.00           H
ATOM   1018 3HD2 LEU A 362     112.720  33.320  43.370  1.00  0.00           H
ATOM   1019  C   LEU A 362     114.090  35.340  46.720  1.00  0.00           C
ATOM   1020  O   LEU A 362     114.730  34.280  46.900  1.00  0.00           O
ATOM   1021  N   LEU A 363     114.130  36.310  47.590  1.00  0.00           N
ATOM   1022  H   LEU A 363     113.360  36.970  47.520  1.00  0.00           H
ATOM   1023  CA  LEU A 363     115.040  36.250  48.750  1.00  0.00           C
ATOM   1024  HA  LEU A 363     116.020  35.940  48.390  1.00  0.00           H
ATOM   1025  CB  LEU A 363     115.080  37.610  49.500  1.00  0.00           C
ATOM   1026  HB1 LEU A 363     115.860  37.620  50.260  1.00  0.00           H
ATOM   1027  HB2 LEU A 363     114.210  37.690  50.150  1.00  0.00           H
ATOM   1028  CG  LEU A 363     115.180  38.920  48.690  1.00  0.00           C
ATOM   1029  HG  LEU A 363     114.350  38.880  47.980  1.00  0.00           H
ATOM   1030  CD1 LEU A 363     114.850  40.210  49.520  1.00  0.00           C
ATOM   1031 1HD1 LEU A 363     114.870  41.090  48.870  1.00  0.00           H
ATOM   1032 2HD1 LEU A 363     113.850  40.140  49.940  1.00  0.00           H
ATOM   1033 3HD1 LEU A 363     115.670  40.310  50.230  1.00  0.00           H
ATOM   1034  CD2 LEU A 363     116.480  39.040  47.930  1.00  0.00           C
ATOM   1035 1HD2 LEU A 363     117.280  38.910  48.660  1.00  0.00           H
ATOM   1036 2HD2 LEU A 363     116.570  38.270  47.160  1.00  0.00           H
ATOM   1037 3HD2 LEU A 363     116.530  40.030  47.490  1.00  0.00           H
ATOM   1038  C   LEU A 363     114.790  35.150  49.760  1.00  0.00           C
ATOM   1039  O   LEU A 363     115.670  34.860  50.580  1.00  0.00           O
ATOM   1040  N   PHE A 364     113.580  34.500  49.750  1.00  0.00           N
ATOM   1041  H   PHE A 364     112.870  34.710  49.060  1.00  0.00           H
ATOM   1042  CA  PHE A 364     113.270  33.470  50.690  1.00  0.00           C
ATOM   1043  HA  PHE A 364     113.240  33.810  51.720  1.00  0.00           H
ATOM   1044  CB  PHE A 364     111.880  32.970  50.350  1.00  0.00           C
ATOM   1045  HB1 PHE A 364     111.130  33.750  50.510  1.00  0.00           H
ATOM   1046  HB2 PHE A 364     111.730  32.230  51.140  1.00  0.00           H
ATOM   1047  CG  PHE A 364     111.700  32.290  49.000  1.00  0.00           C
ATOM   1048  CD1 PHE A 364     111.540  33.040  47.770  1.00  0.00           C
ATOM   1049  HD1 PHE A 364     111.650  34.120  47.780  1.00  0.00           H
ATOM   1050  CE1 PHE A 364     111.540  32.350  46.610  1.00  0.00           C
ATOM   1051  HE1 PHE A 364     111.510  32.940  45.700  1.00  0.00           H
ATOM   1052  CZ  PHE A 364     111.450  30.960  46.570  1.00  0.00           C
ATOM   1053  HZ  PHE A 364     111.310  30.490  45.610  1.00  0.00           H
ATOM   1054  CE2 PHE A 364     111.340  30.210  47.730  1.00  0.00           C
ATOM   1055  HE2 PHE A 364     111.070  29.170  47.730  1.00  0.00           H
ATOM   1056  CD2 PHE A 364     111.470  30.900  49.000  1.00  0.00           C
ATOM   1057  HD2 PHE A 364     111.380  30.260  49.870  1.00  0.00           H
ATOM   1058  C   PHE A 364     114.250  32.280  50.690  1.00  0.00           C
ATOM   1059  O   PHE A 364     114.410  31.540  51.650  1.00  0.00           O
ATOM   1060  N   ASN A 365     114.850  31.970  49.530  1.00  0.00           N
ATOM   1061  H   ASN A 365     114.640  32.580  48.750  1.00  0.00           H
ATOM   1062  CA  ASN A 365     115.860  30.920  49.390  1.00  0.00           C
ATOM   1063  HA  ASN A 365     115.340  29.990  49.650  1.00  0.00           H
ATOM   1064  CB  ASN A 365     116.330  30.950  47.930  1.00  0.00           C
ATOM   1065  HB1 ASN A 365     117.190  30.290  47.830  1.00  0.00           H
ATOM   1066  HB2 ASN A 365     116.690  31.950  47.690  1.00  0.00           H
ATOM   1067  CG  ASN A 365     115.220  30.500  46.980  1.00  0.00           C
ATOM   1068  OD1 ASN A 365     114.930  29.290  46.980  1.00  0.00           O
ATOM   1069  ND2 ASN A 365     114.600  31.390  46.180  1.00  0.00           N
ATOM   1070 1HD2 ASN A 365     114.730  32.350  46.440  1.00  0.00           H
ATOM   1071 2HD2 ASN A 365     113.830  31.060  45.620  1.00  0.00           H
ATOM   1072  C   ASN A 365     117.040  31.180  50.360  1.00  0.00           C
ATOM   1073  O   ASN A 365     117.630  30.250  50.900  1.00  0.00           O
ATOM   1074  N   GLU A 366     117.520  32.440  50.590  1.00  0.00           N
ATOM   1075  H   GLU A 366     117.070  33.280  50.260  1.00  0.00           H
ATOM   1076  CA  GLU A 366     118.520  32.790  51.610  1.00  0.00           C
ATOM   1077  HA  GLU A 366     119.440  32.220  51.430  1.00  0.00           H
ATOM   1078  CB  GLU A 366     118.960  34.290  51.530  1.00  0.00           C
ATOM   1079  HB1 GLU A 366     118.170  34.880  51.990  1.00  0.00           H
ATOM   1080  HB2 GLU A 366     119.110  34.510  50.480  1.00  0.00           H
ATOM   1081  CG  GLU A 366     120.350  34.600  52.220  1.00  0.00           C
ATOM   1082  HG1 GLU A 366     121.040  33.810  51.930  1.00  0.00           H
ATOM   1083  HG2 GLU A 366     120.300  34.710  53.300  1.00  0.00           H
ATOM   1084  CD  GLU A 366     120.720  35.940  51.560  1.00  0.00           C
ATOM   1085  OE1 GLU A 366     120.610  37.020  52.220  1.00  0.00           O
ATOM   1086  OE2 GLU A 366     121.190  35.880  50.370  1.00  0.00           O
ATOM   1087  C   GLU A 366     118.070  32.360  52.990  1.00  0.00           C
ATOM   1088  O   GLU A 366     118.910  32.000  53.800  1.00  0.00           O
ATOM   1089  N   VAL A 367     116.830  32.510  53.340  1.00  0.00           N
ATOM   1090  H   VAL A 367     116.180  32.750  52.610  1.00  0.00           H
ATOM   1091  CA  VAL A 367     116.210  32.400  54.730  1.00  0.00           C
ATOM   1092  HA  VAL A 367     116.810  33.100  55.310  1.00  0.00           H
ATOM   1093  CB  VAL A 367     114.760  32.850  54.780  1.00  0.00           C
ATOM   1094  HB  VAL A 367     114.190  32.290  54.030  1.00  0.00           H
ATOM   1095  CG1 VAL A 367     114.140  32.700  56.180  1.00  0.00           C
ATOM   1096 1HG1 VAL A 367     114.090  31.620  56.340  1.00  0.00           H
ATOM   1097 2HG1 VAL A 367     114.720  33.120  56.990  1.00  0.00           H
ATOM   1098 3HG1 VAL A 367     113.110  33.070  56.130  1.00  0.00           H
ATOM   1099  CG2 VAL A 367     114.680  34.290  54.210  1.00  0.00           C
ATOM   1100 1HG2 VAL A 367     115.170  34.930  54.950  1.00  0.00           H
ATOM   1101 2HG2 VAL A 367     115.210  34.360  53.270  1.00  0.00           H
ATOM   1102 3HG2 VAL A 367     113.690  34.690  53.990  1.00  0.00           H
ATOM   1103  C   VAL A 367     116.430  30.980  55.250  1.00  0.00           C
ATOM   1104  O   VAL A 367     116.710  30.780  56.410  1.00  0.00           O
ATOM   1105  N   VAL A 368     116.300  30.030  54.380  1.00  0.00           N
ATOM   1106  H   VAL A 368     116.130  30.390  53.450  1.00  0.00           H
ATOM   1107  CA  VAL A 368     116.150  28.590  54.570  1.00  0.00           C
ATOM   1108  HA  VAL A 368     116.150  28.480  55.660  1.00  0.00           H
ATOM   1109  CB  VAL A 368     114.780  28.030  54.250  1.00  0.00           C
ATOM   1110  HB  VAL A 368     114.740  26.990  54.580  1.00  0.00           H
ATOM   1111  CG1 VAL A 368     113.650  28.660  55.060  1.00  0.00           C
ATOM   1112 1HG1 VAL A 368     113.930  28.740  56.110  1.00  0.00           H
ATOM   1113 2HG1 VAL A 368     113.410  29.660  54.710  1.00  0.00           H
ATOM   1114 3HG1 VAL A 368     112.810  27.970  54.940  1.00  0.00           H
ATOM   1115  CG2 VAL A 368     114.370  28.040  52.770  1.00  0.00           C
ATOM   1116 1HG2 VAL A 368     113.360  27.640  52.640  1.00  0.00           H
ATOM   1117 2HG2 VAL A 368     114.410  29.050  52.370  1.00  0.00           H
ATOM   1118 3HG2 VAL A 368     115.110  27.430  52.250  1.00  0.00           H
ATOM   1119  C   VAL A 368     117.270  27.700  54.050  1.00  0.00           C
ATOM   1120  O   VAL A 368     117.840  26.860  54.810  1.00  0.00           O
ATOM   1121  N   ILE A 369     117.750  27.910  52.800  1.00  0.00           N
ATOM   1122  H   ILE A 369     117.330  28.680  52.300  1.00  0.00           H
ATOM   1123  CA  ILE A 369     118.800  27.050  52.220  1.00  0.00           C
ATOM   1124  HA  ILE A 369     118.480  26.050  52.510  1.00  0.00           H
ATOM   1125  CB  ILE A 369     118.940  27.190  50.660  1.00  0.00           C
ATOM   1126  HB  ILE A 369     119.230  28.220  50.450  1.00  0.00           H
ATOM   1127  CG2 ILE A 369     119.960  26.130  50.170  1.00  0.00           C
ATOM   1128 1HG2 ILE A 369     120.940  26.190  50.640  1.00  0.00           H
ATOM   1129 2HG2 ILE A 369     119.460  25.200  50.450  1.00  0.00           H
ATOM   1130 3HG2 ILE A 369     120.110  26.170  49.090  1.00  0.00           H
ATOM   1131  CG1 ILE A 369     117.600  26.850  49.970  1.00  0.00           C
ATOM   1132 1HG1 ILE A 369     116.820  27.530  50.320  1.00  0.00           H
ATOM   1133 2HG1 ILE A 369     117.220  25.880  50.280  1.00  0.00           H
ATOM   1134  CD  ILE A 369     117.530  26.920  48.420  1.00  0.00           C
ATOM   1135  HD1 ILE A 369     118.080  26.080  48.010  1.00  0.00           H
ATOM   1136  HD2 ILE A 369     116.470  26.880  48.140  1.00  0.00           H
ATOM   1137  HD3 ILE A 369     117.980  27.860  48.090  1.00  0.00           H
ATOM   1138  C   ILE A 369     120.130  27.410  52.950  1.00  0.00           C
ATOM   1139  O   ILE A 369     120.890  26.530  53.410  1.00  0.00           O
ATOM   1140  N   MET A 370     120.450  28.720  52.960  1.00  0.00           N
ATOM   1141  H   MET A 370     119.760  29.320  52.530  1.00  0.00           H
ATOM   1142  CA  MET A 370     121.730  29.260  53.420  1.00  0.00           C
ATOM   1143  HA  MET A 370     122.560  28.650  53.060  1.00  0.00           H
ATOM   1144  CB  MET A 370     122.060  30.620  52.890  1.00  0.00           C
ATOM   1145  HB1 MET A 370     121.270  31.320  53.190  1.00  0.00           H
ATOM   1146  HB2 MET A 370     121.940  30.570  51.810  1.00  0.00           H
ATOM   1147  CG  MET A 370     123.430  31.220  53.170  1.00  0.00           C
ATOM   1148  HG1 MET A 370     124.110  30.490  52.720  1.00  0.00           H
ATOM   1149  HG2 MET A 370     123.590  31.290  54.240  1.00  0.00           H
ATOM   1150  SD  MET A 370     123.840  32.830  52.550  1.00  0.00           S
ATOM   1151  CE  MET A 370     125.610  32.870  53.000  1.00  0.00           C
ATOM   1152  HE1 MET A 370     126.020  33.760  52.530  1.00  0.00           H
ATOM   1153  HE2 MET A 370     125.620  32.980  54.080  1.00  0.00           H
ATOM   1154  HE3 MET A 370     125.950  31.930  52.560  1.00  0.00           H
ATOM   1155  C   MET A 370     121.960  29.200  54.900  1.00  0.00           C
ATOM   1156  O   MET A 370     123.120  29.160  55.410  1.00  0.00           O
ATOM   1157  N   ARG A 371     120.950  29.060  55.740  1.00  0.00           N
ATOM   1158  H   ARG A 371     120.040  28.800  55.380  1.00  0.00           H
ATOM   1159  CA  ARG A 371     121.020  28.900  57.110  1.00  0.00           C
ATOM   1160  HA  ARG A 371     121.580  29.710  57.580  1.00  0.00           H
ATOM   1161  CB  ARG A 371     119.500  28.930  57.680  1.00  0.00           C
ATOM   1162  HB1 ARG A 371     119.080  27.950  57.460  1.00  0.00           H
ATOM   1163  HB2 ARG A 371     118.870  29.690  57.200  1.00  0.00           H
ATOM   1164  CG  ARG A 371     119.540  29.100  59.200  1.00  0.00           C
ATOM   1165  HG1 ARG A 371     119.930  30.100  59.390  1.00  0.00           H
ATOM   1166  HG2 ARG A 371     120.280  28.450  59.680  1.00  0.00           H
ATOM   1167  CD  ARG A 371     118.150  29.030  59.820  1.00  0.00           C
ATOM   1168  HD1 ARG A 371     118.310  29.240  60.870  1.00  0.00           H
ATOM   1169  HD2 ARG A 371     117.750  28.040  59.600  1.00  0.00           H
ATOM   1170  NE  ARG A 371     117.190  29.970  59.150  1.00  0.00           N
ATOM   1171  HE  ARG A 371     117.380  30.290  58.210  1.00  0.00           H
ATOM   1172  CZ  ARG A 371     116.390  30.860  59.670  1.00  0.00           C
ATOM   1173  NH1 ARG A 371     116.190  30.890  60.920  1.00  0.00           N
ATOM   1174 1HH1 ARG A 371     116.280  30.040  61.470  1.00  0.00           H
ATOM   1175 2HH1 ARG A 371     115.760  31.600  61.490  1.00  0.00           H
ATOM   1176  NH2 ARG A 371     115.790  31.710  58.960  1.00  0.00           N
ATOM   1177 1HH2 ARG A 371     115.890  31.690  57.960  1.00  0.00           H
ATOM   1178 2HH2 ARG A 371     115.260  32.380  59.510  1.00  0.00           H
ATOM   1179  C   ARG A 371     121.760  27.610  57.520  1.00  0.00           C
ATOM   1180  O   ARG A 371     121.270  26.490  57.430  1.00  0.00           O
ATOM   1181  N   ASP A 372     122.900  27.790  58.180  1.00  0.00           N
ATOM   1182  H   ASP A 372     123.190  28.750  58.230  1.00  0.00           H
ATOM   1183  CA  ASP A 372     123.710  26.800  58.880  1.00  0.00           C
ATOM   1184  HA  ASP A 372     124.620  27.360  59.080  1.00  0.00           H
ATOM   1185  CB  ASP A 372     123.020  26.410  60.180  1.00  0.00           C
ATOM   1186  HB1 ASP A 372     122.120  25.830  59.940  1.00  0.00           H
ATOM   1187  HB2 ASP A 372     122.640  27.310  60.680  1.00  0.00           H
ATOM   1188  CG  ASP A 372     123.910  25.660  61.150  1.00  0.00           C
ATOM   1189  OD1 ASP A 372     123.540  24.690  61.820  1.00  0.00           O
ATOM   1190  OD2 ASP A 372     125.060  26.080  61.470  1.00  0.00           O
ATOM   1191  C   ASP A 372     124.070  25.600  57.970  1.00  0.00           C
ATOM   1192  O   ASP A 372     123.780  24.450  58.290  1.00  0.00           O
ATOM   1193  N   TYR A 373     124.420  25.850  56.720  1.00  0.00           N
ATOM   1194  H   TYR A 373     124.550  26.830  56.490  1.00  0.00           H
ATOM   1195  CA  TYR A 373     124.590  24.870  55.650  1.00  0.00           C
ATOM   1196  HA  TYR A 373     123.770  24.160  55.650  1.00  0.00           H
ATOM   1197  CB  TYR A 373     124.630  25.640  54.350  1.00  0.00           C
ATOM   1198  HB1 TYR A 373     125.360  26.450  54.350  1.00  0.00           H
ATOM   1199  HB2 TYR A 373     123.750  26.270  54.240  1.00  0.00           H
ATOM   1200  CG  TYR A 373     124.630  24.740  53.150  1.00  0.00           C
ATOM   1201  CD1 TYR A 373     125.830  24.160  52.750  1.00  0.00           C
ATOM   1202  HD1 TYR A 373     126.730  24.450  53.270  1.00  0.00           H
ATOM   1203  CE1 TYR A 373     125.860  23.200  51.710  1.00  0.00           C
ATOM   1204  HE1 TYR A 373     126.780  22.740  51.390  1.00  0.00           H
ATOM   1205  CZ  TYR A 373     124.710  22.820  51.070  1.00  0.00           C
ATOM   1206  OH  TYR A 373     124.770  21.920  50.080  1.00  0.00           O
ATOM   1207  HH  TYR A 373     123.930  21.580  49.780  1.00  0.00           H
ATOM   1208  CE2 TYR A 373     123.490  23.410  51.490  1.00  0.00           C
ATOM   1209  HE2 TYR A 373     122.530  23.050  51.160  1.00  0.00           H
ATOM   1210  CD2 TYR A 373     123.430  24.310  52.490  1.00  0.00           C
ATOM   1211  HD2 TYR A 373     122.440  24.590  52.840  1.00  0.00           H
ATOM   1212  C   TYR A 373     125.830  24.120  55.970  1.00  0.00           C
ATOM   1213  O   TYR A 373     126.760  24.770  56.430  1.00  0.00           O
ATOM   1214  N   GLN A 374     125.860  22.780  55.760  1.00  0.00           N
ATOM   1215  H   GLN A 374     125.030  22.280  55.500  1.00  0.00           H
ATOM   1216  CA  GLN A 374     127.030  21.990  56.280  1.00  0.00           C
ATOM   1217  HA  GLN A 374     127.530  22.450  57.130  1.00  0.00           H
ATOM   1218  CB  GLN A 374     126.540  20.680  56.920  1.00  0.00           C
ATOM   1219  HB1 GLN A 374     127.290  20.020  57.350  1.00  0.00           H
ATOM   1220  HB2 GLN A 374     126.070  19.980  56.230  1.00  0.00           H
ATOM   1221  CG  GLN A 374     125.610  21.060  58.130  1.00  0.00           C
ATOM   1222  HG1 GLN A 374     124.780  21.680  57.810  1.00  0.00           H
ATOM   1223  HG2 GLN A 374     126.280  21.520  58.850  1.00  0.00           H
ATOM   1224  CD  GLN A 374     125.160  19.730  58.730  1.00  0.00           C
ATOM   1225  OE1 GLN A 374     124.590  18.920  57.980  1.00  0.00           O
ATOM   1226  NE2 GLN A 374     125.160  19.550  60.060  1.00  0.00           N
ATOM   1227 1HE2 GLN A 374     125.460  20.270  60.700  1.00  0.00           H
ATOM   1228 2HE2 GLN A 374     124.650  18.740  60.380  1.00  0.00           H
ATOM   1229  C   GLN A 374     128.110  21.730  55.240  1.00  0.00           C
ATOM   1230  O   GLN A 374     128.230  20.680  54.590  1.00  0.00           O
ATOM   1231  N   HIS A 375     128.940  22.780  55.050  1.00  0.00           N
ATOM   1232  H   HIS A 375     128.710  23.590  55.620  1.00  0.00           H
ATOM   1233  CA  HIS A 375     130.140  22.790  54.160  1.00  0.00           C
ATOM   1234  HA  HIS A 375     130.600  21.810  54.300  1.00  0.00           H
ATOM   1235  CB  HIS A 375     129.680  22.860  52.770  1.00  0.00           C
ATOM   1236  HB1 HIS A 375     129.570  23.930  52.580  1.00  0.00           H
ATOM   1237  HB2 HIS A 375     128.710  22.420  52.570  1.00  0.00           H
ATOM   1238  CG  HIS A 375     130.670  22.440  51.680  1.00  0.00           C
ATOM   1239  ND1 HIS A 375     131.830  23.120  51.270  1.00  0.00           N
ATOM   1240  CE1 HIS A 375     132.310  22.520  50.210  1.00  0.00           C
ATOM   1241  HE1 HIS A 375     133.330  22.680  49.890  1.00  0.00           H
ATOM   1242  NE2 HIS A 375     131.660  21.360  50.050  1.00  0.00           N
ATOM   1243  HE2 HIS A 375     131.910  20.530  49.520  1.00  0.00           H
ATOM   1244  CD2 HIS A 375     130.640  21.250  50.980  1.00  0.00           C
ATOM   1245  HD2 HIS A 375     130.010  20.380  51.120  1.00  0.00           H
ATOM   1246  C   HIS A 375     131.180  23.860  54.480  1.00  0.00           C
ATOM   1247  O   HIS A 375     130.770  24.870  55.070  1.00  0.00           O
ATOM   1248  N   GLU A 376     132.400  23.520  54.340  1.00  0.00           N
ATOM   1249  H   GLU A 376     132.550  22.590  53.990  1.00  0.00           H
ATOM   1250  CA  GLU A 376     133.600  24.370  54.540  1.00  0.00           C
ATOM   1251  HA  GLU A 376     133.550  24.700  55.580  1.00  0.00           H
ATOM   1252  CB  GLU A 376     134.830  23.440  54.220  1.00  0.00           C
ATOM   1253  HB1 GLU A 376     134.980  23.120  53.190  1.00  0.00           H
ATOM   1254  HB2 GLU A 376     134.830  22.630  54.940  1.00  0.00           H
ATOM   1255  CG  GLU A 376     136.050  24.340  54.500  1.00  0.00           C
ATOM   1256  HG1 GLU A 376     135.930  24.950  55.400  1.00  0.00           H
ATOM   1257  HG2 GLU A 376     136.240  24.990  53.650  1.00  0.00           H
ATOM   1258  CD  GLU A 376     137.310  23.400  54.710  1.00  0.00           C
ATOM   1259  OE1 GLU A 376     137.640  23.080  55.840  1.00  0.00           O
ATOM   1260  OE2 GLU A 376     137.840  23.000  53.610  1.00  0.00           O
ATOM   1261  C   GLU A 376     133.610  25.580  53.570  1.00  0.00           C
ATOM   1262  O   GLU A 376     134.360  26.550  53.800  1.00  0.00           O
ATOM   1263  N   ASN A 377     132.930  25.550  52.440  1.00  0.00           N
ATOM   1264  H   ASN A 377     132.520  24.670  52.180  1.00  0.00           H
ATOM   1265  CA  ASN A 377     133.140  26.580  51.430  1.00  0.00           C
ATOM   1266  HA  ASN A 377     133.850  27.360  51.700  1.00  0.00           H
ATOM   1267  CB  ASN A 377     133.680  25.860  50.180  1.00  0.00           C
ATOM   1268  HB1 ASN A 377     133.700  26.580  49.370  1.00  0.00           H
ATOM   1269  HB2 ASN A 377     133.010  25.010  50.020  1.00  0.00           H
ATOM   1270  CG  ASN A 377     135.100  25.260  50.430  1.00  0.00           C
ATOM   1271  OD1 ASN A 377     135.310  24.100  50.430  1.00  0.00           O
ATOM   1272  ND2 ASN A 377     136.090  26.170  50.680  1.00  0.00           N
ATOM   1273 1HD2 ASN A 377     135.770  27.130  50.620  1.00  0.00           H
ATOM   1274 2HD2 ASN A 377     136.980  25.880  51.050  1.00  0.00           H
ATOM   1275  C   ASN A 377     131.900  27.450  51.160  1.00  0.00           C
ATOM   1276  O   ASN A 377     131.800  28.000  50.070  1.00  0.00           O
ATOM   1277  N   VAL A 378     131.050  27.530  52.190  1.00  0.00           N
ATOM   1278  H   VAL A 378     131.260  26.970  53.010  1.00  0.00           H
ATOM   1279  CA  VAL A 378     129.820  28.390  52.240  1.00  0.00           C
ATOM   1280  HA  VAL A 378     129.930  29.080  51.400  1.00  0.00           H
ATOM   1281  CB  VAL A 378     128.550  27.480  52.190  1.00  0.00           C
ATOM   1282  HB  VAL A 378     128.740  26.640  52.860  1.00  0.00           H
ATOM   1283  CG1 VAL A 378     127.160  28.150  52.520  1.00  0.00           C
ATOM   1284 1HG1 VAL A 378     127.160  28.490  53.560  1.00  0.00           H
ATOM   1285 2HG1 VAL A 378     126.810  28.860  51.770  1.00  0.00           H
ATOM   1286 3HG1 VAL A 378     126.430  27.340  52.410  1.00  0.00           H
ATOM   1287  CG2 VAL A 378     128.480  26.840  50.810  1.00  0.00           C
ATOM   1288 1HG2 VAL A 378     129.440  26.390  50.560  1.00  0.00           H
ATOM   1289 2HG2 VAL A 378     127.830  25.970  50.800  1.00  0.00           H
ATOM   1290 3HG2 VAL A 378     128.230  27.690  50.170  1.00  0.00           H
ATOM   1291  C   VAL A 378     129.880  29.250  53.450  1.00  0.00           C
ATOM   1292  O   VAL A 378     130.480  28.830  54.450  1.00  0.00           O
ATOM   1293  N   VAL A 379     129.290  30.410  53.420  1.00  0.00           N
ATOM   1294  H   VAL A 379     128.710  30.580  52.600  1.00  0.00           H
ATOM   1295  CA  VAL A 379     129.320  31.430  54.580  1.00  0.00           C
ATOM   1296  HA  VAL A 379     130.310  31.440  55.030  1.00  0.00           H
ATOM   1297  CB  VAL A 379     129.110  32.810  54.030  1.00  0.00           C
ATOM   1298  HB  VAL A 379     128.130  32.800  53.550  1.00  0.00           H
ATOM   1299  CG1 VAL A 379     128.900  33.870  55.090  1.00  0.00           C
ATOM   1300 1HG1 VAL A 379     128.120  33.470  55.730  1.00  0.00           H
ATOM   1301 2HG1 VAL A 379     129.770  33.930  55.740  1.00  0.00           H
ATOM   1302 3HG1 VAL A 379     128.590  34.820  54.660  1.00  0.00           H
ATOM   1303  CG2 VAL A 379     130.250  33.240  53.090  1.00  0.00           C
ATOM   1304 1HG2 VAL A 379     130.410  32.450  52.350  1.00  0.00           H
ATOM   1305 2HG2 VAL A 379     129.940  34.150  52.570  1.00  0.00           H
ATOM   1306 3HG2 VAL A 379     131.080  33.490  53.750  1.00  0.00           H
ATOM   1307  C   VAL A 379     128.290  31.120  55.640  1.00  0.00           C
ATOM   1308  O   VAL A 379     127.150  30.810  55.370  1.00  0.00           O
ATOM   1309  N   GLU A 380     128.670  31.170  56.880  1.00  0.00           N
ATOM   1310  H   GLU A 380     129.530  31.660  57.020  1.00  0.00           H
ATOM   1311  CA  GLU A 380     127.760  30.790  57.970  1.00  0.00           C
ATOM   1312  HA  GLU A 380     127.170  29.900  57.750  1.00  0.00           H
ATOM   1313  CB  GLU A 380     128.620  30.530  59.240  1.00  0.00           C
ATOM   1314  HB1 GLU A 380     128.660  31.500  59.740  1.00  0.00           H
ATOM   1315  HB2 GLU A 380     129.600  30.240  58.870  1.00  0.00           H
ATOM   1316  CG  GLU A 380     127.960  29.500  60.160  1.00  0.00           C
ATOM   1317  HG1 GLU A 380     127.790  28.600  59.570  1.00  0.00           H
ATOM   1318  HG2 GLU A 380     126.990  29.920  60.420  1.00  0.00           H
ATOM   1319  CD  GLU A 380     128.780  29.100  61.380  1.00  0.00           C
ATOM   1320  OE1 GLU A 380     129.210  27.930  61.530  1.00  0.00           O
ATOM   1321  OE2 GLU A 380     129.160  30.020  62.120  1.00  0.00           O
ATOM   1322  C   GLU A 380     126.700  31.890  58.180  1.00  0.00           C
ATOM   1323  O   GLU A 380     126.990  33.060  58.230  1.00  0.00           O
ATOM   1324  N   MET A 381     125.440  31.460  58.220  1.00  0.00           N
ATOM   1325  H   MET A 381     125.230  30.480  58.170  1.00  0.00           H
ATOM   1326  CA  MET A 381     124.260  32.280  58.400  1.00  0.00           C
ATOM   1327  HA  MET A 381     124.500  33.300  58.700  1.00  0.00           H
ATOM   1328  CB  MET A 381     123.520  32.230  57.020  1.00  0.00           C
ATOM   1329  HB1 MET A 381     123.190  31.250  56.660  1.00  0.00           H
ATOM   1330  HB2 MET A 381     124.250  32.690  56.360  1.00  0.00           H
ATOM   1331  CG  MET A 381     122.300  33.080  56.800  1.00  0.00           C
ATOM   1332  HG1 MET A 381     122.110  33.020  55.730  1.00  0.00           H
ATOM   1333  HG2 MET A 381     122.650  34.090  57.020  1.00  0.00           H
ATOM   1334  SD  MET A 381     120.820  32.710  57.800  1.00  0.00           S
ATOM   1335  CE  MET A 381     119.480  32.880  56.610  1.00  0.00           C
ATOM   1336  HE1 MET A 381     118.720  33.530  57.040  1.00  0.00           H
ATOM   1337  HE2 MET A 381     119.940  33.300  55.720  1.00  0.00           H
ATOM   1338  HE3 MET A 381     119.150  31.860  56.410  1.00  0.00           H
ATOM   1339  C   MET A 381     123.340  31.750  59.540  1.00  0.00           C
ATOM   1340  O   MET A 381     123.210  30.500  59.700  1.00  0.00           O
ATOM   1341  N   TYR A 382     122.710  32.670  60.300  1.00  0.00           N
ATOM   1342  H   TYR A 382     122.990  33.620  60.110  1.00  0.00           H
ATOM   1343  CA  TYR A 382     122.130  32.420  61.610  1.00  0.00           C
ATOM   1344  HA  TYR A 382     122.390  31.390  61.880  1.00  0.00           H
ATOM   1345  CB  TYR A 382     122.860  33.210  62.690  1.00  0.00           C
ATOM   1346  HB1 TYR A 382     122.480  32.840  63.640  1.00  0.00           H
ATOM   1347  HB2 TYR A 382     122.540  34.240  62.540  1.00  0.00           H
ATOM   1348  CG  TYR A 382     124.350  33.100  62.690  1.00  0.00           C
ATOM   1349  CD1 TYR A 382     124.880  31.790  62.610  1.00  0.00           C
ATOM   1350  HD1 TYR A 382     124.200  30.960  62.640  1.00  0.00           H
ATOM   1351  CE1 TYR A 382     126.270  31.630  62.570  1.00  0.00           C
ATOM   1352  HE1 TYR A 382     126.660  30.630  62.670  1.00  0.00           H
ATOM   1353  CZ  TYR A 382     127.150  32.670  62.510  1.00  0.00           C
ATOM   1354  OH  TYR A 382     128.460  32.530  62.610  1.00  0.00           O
ATOM   1355  HH  TYR A 382     128.790  31.640  62.470  1.00  0.00           H
ATOM   1356  CE2 TYR A 382     126.590  34.000  62.560  1.00  0.00           C
ATOM   1357  HE2 TYR A 382     127.280  34.820  62.590  1.00  0.00           H
ATOM   1358  CD2 TYR A 382     125.200  34.210  62.570  1.00  0.00           C
ATOM   1359  HD2 TYR A 382     124.890  35.230  62.750  1.00  0.00           H
ATOM   1360  C   TYR A 382     120.580  32.530  61.560  1.00  0.00           C
ATOM   1361  O   TYR A 382     119.920  31.560  61.630  1.00  0.00           O
ATOM   1362  N   ASN A 383     120.060  33.740  61.470  1.00  0.00           N
ATOM   1363  H   ASN A 383     120.770  34.450  61.340  1.00  0.00           H
ATOM   1364  CA  ASN A 383     118.670  34.130  61.580  1.00  0.00           C
ATOM   1365  HA  ASN A 383     117.940  33.330  61.450  1.00  0.00           H
ATOM   1366  CB  ASN A 383     118.300  34.680  63.000  1.00  0.00           C
ATOM   1367  HB1 ASN A 383     117.290  35.070  62.980  1.00  0.00           H
ATOM   1368  HB2 ASN A 383     119.000  35.440  63.350  1.00  0.00           H
ATOM   1369  CG  ASN A 383     118.520  33.580  64.050  1.00  0.00           C
ATOM   1370  OD1 ASN A 383     119.580  33.530  64.720  1.00  0.00           O
ATOM   1371  ND2 ASN A 383     117.640  32.610  64.200  1.00  0.00           N
ATOM   1372 1HD2 ASN A 383     116.820  32.680  63.620  1.00  0.00           H
ATOM   1373 2HD2 ASN A 383     117.720  32.010  65.010  1.00  0.00           H
ATOM   1374  C   ASN A 383     118.260  35.160  60.440  1.00  0.00           C
ATOM   1375  O   ASN A 383     119.060  35.840  59.840  1.00  0.00           O
ATOM   1376  N   SER A 384     116.960  35.390  60.300  1.00  0.00           N
ATOM   1377  H   SER A 384     116.280  35.040  60.960  1.00  0.00           H
ATOM   1378  CA  SER A 384     116.360  36.310  59.320  1.00  0.00           C
ATOM   1379  HA  SER A 384     117.010  37.190  59.300  1.00  0.00           H
ATOM   1380  CB  SER A 384     116.190  35.550  58.030  1.00  0.00           C
ATOM   1381  HB1 SER A 384     115.480  34.740  58.210  1.00  0.00           H
ATOM   1382  HB2 SER A 384     117.170  35.250  57.670  1.00  0.00           H
ATOM   1383  OG  SER A 384     115.520  36.440  57.110  1.00  0.00           O
ATOM   1384  HG  SER A 384     115.910  37.300  56.980  1.00  0.00           H
ATOM   1385  C   SER A 384     115.010  36.770  59.850  1.00  0.00           C
ATOM   1386  O   SER A 384     114.260  36.070  60.480  1.00  0.00           O
ATOM   1387  N   TYR A 385     114.690  38.000  59.560  1.00  0.00           N
ATOM   1388  H   TYR A 385     115.290  38.410  58.860  1.00  0.00           H
ATOM   1389  CA  TYR A 385     113.530  38.740  60.000  1.00  0.00           C
ATOM   1390  HA  TYR A 385     112.850  38.020  60.450  1.00  0.00           H
ATOM   1391  CB  TYR A 385     114.000  39.680  61.140  1.00  0.00           C
ATOM   1392  HB1 TYR A 385     113.120  40.170  61.540  1.00  0.00           H
ATOM   1393  HB2 TYR A 385     114.720  40.380  60.720  1.00  0.00           H
ATOM   1394  CG  TYR A 385     114.660  38.940  62.260  1.00  0.00           C
ATOM   1395  CD1 TYR A 385     116.070  38.740  62.180  1.00  0.00           C
ATOM   1396  HD1 TYR A 385     116.580  38.990  61.260  1.00  0.00           H
ATOM   1397  CE1 TYR A 385     116.780  38.000  63.150  1.00  0.00           C
ATOM   1398  HE1 TYR A 385     117.860  37.920  63.120  1.00  0.00           H
ATOM   1399  CZ  TYR A 385     116.040  37.440  64.220  1.00  0.00           C
ATOM   1400  OH  TYR A 385     116.690  36.670  65.150  1.00  0.00           O
ATOM   1401  HH  TYR A 385     116.060  36.390  65.820  1.00  0.00           H
ATOM   1402  CE2 TYR A 385     114.630  37.510  64.270  1.00  0.00           C
ATOM   1403  HE2 TYR A 385     114.160  36.940  65.050  1.00  0.00           H
ATOM   1404  CD2 TYR A 385     113.960  38.250  63.280  1.00  0.00           C
ATOM   1405  HD2 TYR A 385     112.890  38.270  63.350  1.00  0.00           H
ATOM   1406  C   TYR A 385     112.830  39.560  58.970  1.00  0.00           C
ATOM   1407  O   TYR A 385     113.460  40.020  58.010  1.00  0.00           O
ATOM   1408  N   LEU A 386     111.550  39.860  59.130  1.00  0.00           N
ATOM   1409  H   LEU A 386     111.030  39.320  59.810  1.00  0.00           H
ATOM   1410  CA  LEU A 386     110.720  40.650  58.170  1.00  0.00           C
ATOM   1411  HA  LEU A 386     111.370  40.980  57.360  1.00  0.00           H
ATOM   1412  CB  LEU A 386     109.640  39.860  57.460  1.00  0.00           C
ATOM   1413  HB1 LEU A 386     109.070  39.430  58.280  1.00  0.00           H
ATOM   1414  HB2 LEU A 386     110.160  39.090  56.900  1.00  0.00           H
ATOM   1415  CG  LEU A 386     108.750  40.710  56.600  1.00  0.00           C
ATOM   1416  HG  LEU A 386     108.360  41.500  57.240  1.00  0.00           H
ATOM   1417  CD1 LEU A 386     109.480  41.300  55.400  1.00  0.00           C
ATOM   1418 1HD1 LEU A 386     108.760  41.780  54.740  1.00  0.00           H
ATOM   1419 2HD1 LEU A 386     110.230  42.020  55.740  1.00  0.00           H
ATOM   1420 3HD1 LEU A 386     110.020  40.480  54.940  1.00  0.00           H
ATOM   1421  CD2 LEU A 386     107.670  39.820  56.110  1.00  0.00           C
ATOM   1422 1HD2 LEU A 386     106.840  40.470  55.820  1.00  0.00           H
ATOM   1423 2HD2 LEU A 386     108.080  39.250  55.280  1.00  0.00           H
ATOM   1424 3HD2 LEU A 386     107.290  39.080  56.820  1.00  0.00           H
ATOM   1425  C   LEU A 386     110.290  41.880  59.000  1.00  0.00           C
ATOM   1426  O   LEU A 386     109.620  41.830  60.060  1.00  0.00           O
ATOM   1427  N   VAL A 387     110.900  42.990  58.560  1.00  0.00           N
ATOM   1428  H   VAL A 387     111.550  42.840  57.810  1.00  0.00           H
ATOM   1429  CA  VAL A 387     111.090  44.170  59.440  1.00  0.00           C
ATOM   1430  HA  VAL A 387     110.460  44.130  60.320  1.00  0.00           H
ATOM   1431  CB  VAL A 387     112.540  44.440  59.930  1.00  0.00           C
ATOM   1432  HB  VAL A 387     113.090  44.610  59.010  1.00  0.00           H
ATOM   1433  CG1 VAL A 387     112.500  45.510  61.010  1.00  0.00           C
ATOM   1434 1HG1 VAL A 387     113.430  45.360  61.550  1.00  0.00           H
ATOM   1435 2HG1 VAL A 387     112.390  46.560  60.710  1.00  0.00           H
ATOM   1436 3HG1 VAL A 387     111.770  45.280  61.790  1.00  0.00           H
ATOM   1437  CG2 VAL A 387     113.220  43.240  60.590  1.00  0.00           C
ATOM   1438 1HG2 VAL A 387     112.550  42.680  61.240  1.00  0.00           H
ATOM   1439 2HG2 VAL A 387     113.480  42.600  59.750  1.00  0.00           H
ATOM   1440 3HG2 VAL A 387     114.130  43.400  61.170  1.00  0.00           H
ATOM   1441  C   VAL A 387     110.510  45.430  58.820  1.00  0.00           C
ATOM   1442  O   VAL A 387     111.210  46.340  58.490  1.00  0.00           O
ATOM   1443  N   GLY A 388     109.200  45.550  58.750  1.00  0.00           N
ATOM   1444  H   GLY A 388     108.640  44.830  59.180  1.00  0.00           H
ATOM   1445  CA  GLY A 388     108.500  46.480  57.920  1.00  0.00           C
ATOM   1446  HA1 GLY A 388     108.800  47.520  58.080  1.00  0.00           H
ATOM   1447  HA2 GLY A 388     107.460  46.330  58.190  1.00  0.00           H
ATOM   1448  C   GLY A 388     108.780  46.090  56.500  1.00  0.00           C
ATOM   1449  O   GLY A 388     108.520  44.930  56.150  1.00  0.00           O
ATOM   1450  N   ASP A 389     109.150  47.010  55.650  1.00  0.00           N
ATOM   1451  H   ASP A 389     109.060  48.010  55.810  1.00  0.00           H
ATOM   1452  CA  ASP A 389     109.560  46.760  54.240  1.00  0.00           C
ATOM   1453  HA  ASP A 389     108.910  46.080  53.690  1.00  0.00           H
ATOM   1454  CB  ASP A 389     109.270  48.100  53.430  1.00  0.00           C
ATOM   1455  HB1 ASP A 389     109.480  47.950  52.370  1.00  0.00           H
ATOM   1456  HB2 ASP A 389     109.860  48.960  53.740  1.00  0.00           H
ATOM   1457  CG  ASP A 389     107.830  48.430  53.400  1.00  0.00           C
ATOM   1458  OD1 ASP A 389     107.390  49.250  54.260  1.00  0.00           O
ATOM   1459  OD2 ASP A 389     107.130  47.720  52.600  1.00  0.00           O
ATOM   1460  C   ASP A 389     111.040  46.260  53.970  1.00  0.00           C
ATOM   1461  O   ASP A 389     111.560  46.230  52.880  1.00  0.00           O
ATOM   1462  N   GLU A 390     111.780  45.840  55.030  1.00  0.00           N
ATOM   1463  H   GLU A 390     111.240  45.580  55.850  1.00  0.00           H
ATOM   1464  CA  GLU A 390     113.140  45.340  55.000  1.00  0.00           C
ATOM   1465  HA  GLU A 390     113.600  45.440  54.020  1.00  0.00           H
ATOM   1466  CB  GLU A 390     113.940  46.210  55.980  1.00  0.00           C
ATOM   1467  HB1 GLU A 390     114.970  45.840  56.020  1.00  0.00           H
ATOM   1468  HB2 GLU A 390     113.580  46.050  56.990  1.00  0.00           H
ATOM   1469  CG  GLU A 390     114.000  47.750  55.640  1.00  0.00           C
ATOM   1470  HG1 GLU A 390     112.990  48.170  55.580  1.00  0.00           H
ATOM   1471  HG2 GLU A 390     114.360  47.840  54.610  1.00  0.00           H
ATOM   1472  CD  GLU A 390     114.960  48.480  56.550  1.00  0.00           C
ATOM   1473  OE1 GLU A 390     115.460  49.580  56.190  1.00  0.00           O
ATOM   1474  OE2 GLU A 390     115.100  48.060  57.710  1.00  0.00           O
ATOM   1475  C   GLU A 390     113.200  43.830  55.300  1.00  0.00           C
ATOM   1476  O   GLU A 390     112.640  43.430  56.280  1.00  0.00           O
ATOM   1477  N   LEU A 391     113.940  43.000  54.510  1.00  0.00           N
ATOM   1478  H   LEU A 391     114.080  43.360  53.570  1.00  0.00           H
ATOM   1479  CA  LEU A 391     114.370  41.550  54.880  1.00  0.00           C
ATOM   1480  HA  LEU A 391     113.730  41.130  55.650  1.00  0.00           H
ATOM   1481  CB  LEU A 391     114.380  40.740  53.630  1.00  0.00           C
ATOM   1482  HB1 LEU A 391     114.990  40.990  52.760  1.00  0.00           H
ATOM   1483  HB2 LEU A 391     113.340  40.750  53.280  1.00  0.00           H
ATOM   1484  CG  LEU A 391     114.630  39.230  53.990  1.00  0.00           C
ATOM   1485  HG  LEU A 391     115.640  39.240  54.410  1.00  0.00           H
ATOM   1486  CD1 LEU A 391     113.520  38.620  54.870  1.00  0.00           C
ATOM   1487 1HD1 LEU A 391     113.640  37.550  55.070  1.00  0.00           H
ATOM   1488 2HD1 LEU A 391     113.550  38.950  55.910  1.00  0.00           H
ATOM   1489 3HD1 LEU A 391     112.540  38.650  54.410  1.00  0.00           H
ATOM   1490  CD2 LEU A 391     114.680  38.470  52.750  1.00  0.00           C
ATOM   1491 1HD2 LEU A 391     115.510  38.830  52.150  1.00  0.00           H
ATOM   1492 2HD2 LEU A 391     114.800  37.410  52.950  1.00  0.00           H
ATOM   1493 3HD2 LEU A 391     113.750  38.720  52.230  1.00  0.00           H
ATOM   1494  C   LEU A 391     115.830  41.670  55.430  1.00  0.00           C
ATOM   1495  O   LEU A 391     116.850  41.850  54.680  1.00  0.00           O
ATOM   1496  N   TRP A 392     115.900  41.380  56.710  1.00  0.00           N
ATOM   1497  H   TRP A 392     115.020  41.310  57.190  1.00  0.00           H
ATOM   1498  CA  TRP A 392     117.130  41.290  57.430  1.00  0.00           C
ATOM   1499  HA  TRP A 392     117.810  41.900  56.850  1.00  0.00           H
ATOM   1500  CB  TRP A 392     116.950  41.840  58.830  1.00  0.00           C
ATOM   1501  HB1 TRP A 392     117.910  41.710  59.330  1.00  0.00           H
ATOM   1502  HB2 TRP A 392     116.180  41.220  59.280  1.00  0.00           H
ATOM   1503  CG  TRP A 392     116.710  43.270  59.150  1.00  0.00           C
ATOM   1504  CD1 TRP A 392     115.990  44.090  58.360  1.00  0.00           C
ATOM   1505  HD1 TRP A 392     115.560  43.830  57.400  1.00  0.00           H
ATOM   1506  NE1 TRP A 392     115.840  45.260  58.940  1.00  0.00           N
ATOM   1507  HE1 TRP A 392     115.330  46.040  58.540  1.00  0.00           H
ATOM   1508  CE2 TRP A 392     116.350  45.280  60.190  1.00  0.00           C
ATOM   1509  CZ2 TRP A 392     116.250  46.190  61.230  1.00  0.00           C
ATOM   1510  HZ2 TRP A 392     115.590  47.030  61.090  1.00  0.00           H
ATOM   1511  CH2 TRP A 392     117.070  46.040  62.390  1.00  0.00           C
ATOM   1512  HH2 TRP A 392     117.080  46.750  63.200  1.00  0.00           H
ATOM   1513  CZ3 TRP A 392     117.820  44.890  62.510  1.00  0.00           C
ATOM   1514  HZ3 TRP A 392     118.310  44.630  63.430  1.00  0.00           H
ATOM   1515  CE3 TRP A 392     117.820  43.890  61.540  1.00  0.00           C
ATOM   1516  HE3 TRP A 392     118.310  42.930  61.630  1.00  0.00           H
ATOM   1517  CD2 TRP A 392     117.000  44.030  60.400  1.00  0.00           C
ATOM   1518  C   TRP A 392     117.700  39.890  57.470  1.00  0.00           C
ATOM   1519  O   TRP A 392     116.930  38.910  57.580  1.00  0.00           O
ATOM   1520  N   VAL A 393     119.070  39.680  57.500  1.00  0.00           N
ATOM   1521  H   VAL A 393     119.720  40.430  57.300  1.00  0.00           H
ATOM   1522  CA  VAL A 393     119.630  38.320  57.670  1.00  0.00           C
ATOM   1523  HA  VAL A 393     118.970  37.720  58.290  1.00  0.00           H
ATOM   1524  CB  VAL A 393     119.770  37.630  56.270  1.00  0.00           C
ATOM   1525  HB  VAL A 393     120.590  38.100  55.730  1.00  0.00           H
ATOM   1526  CG1 VAL A 393     120.150  36.200  56.460  1.00  0.00           C
ATOM   1527 1HG1 VAL A 393     121.190  35.990  56.710  1.00  0.00           H
ATOM   1528 2HG1 VAL A 393     119.540  35.790  57.260  1.00  0.00           H
ATOM   1529 3HG1 VAL A 393     120.010  35.640  55.540  1.00  0.00           H
ATOM   1530  CG2 VAL A 393     118.530  37.760  55.300  1.00  0.00           C
ATOM   1531 1HG2 VAL A 393     117.660  37.280  55.760  1.00  0.00           H
ATOM   1532 2HG2 VAL A 393     118.270  38.820  55.220  1.00  0.00           H
ATOM   1533 3HG2 VAL A 393     118.760  37.450  54.280  1.00  0.00           H
ATOM   1534  C   VAL A 393     120.980  38.400  58.280  1.00  0.00           C
ATOM   1535  O   VAL A 393     121.770  39.340  57.900  1.00  0.00           O
ATOM   1536  N   VAL A 394     121.230  37.540  59.230  1.00  0.00           N
ATOM   1537  H   VAL A 394     120.580  36.770  59.300  1.00  0.00           H
ATOM   1538  CA  VAL A 394     122.350  37.640  60.140  1.00  0.00           C
ATOM   1539  HA  VAL A 394     122.770  38.640  60.020  1.00  0.00           H
ATOM   1540  CB  VAL A 394     121.930  37.360  61.620  1.00  0.00           C
ATOM   1541  HB  VAL A 394     121.580  36.330  61.660  1.00  0.00           H
ATOM   1542  CG1 VAL A 394     123.030  37.720  62.640  1.00  0.00           C
ATOM   1543 1HG1 VAL A 394     124.000  37.340  62.320  1.00  0.00           H
ATOM   1544 2HG1 VAL A 394     123.110  38.800  62.760  1.00  0.00           H
ATOM   1545 3HG1 VAL A 394     122.940  37.240  63.620  1.00  0.00           H
ATOM   1546  CG2 VAL A 394     120.740  38.330  62.010  1.00  0.00           C
ATOM   1547 1HG2 VAL A 394     120.980  39.350  61.720  1.00  0.00           H
ATOM   1548 2HG2 VAL A 394     119.840  37.880  61.590  1.00  0.00           H
ATOM   1549 3HG2 VAL A 394     120.710  38.440  63.090  1.00  0.00           H
ATOM   1550  C   VAL A 394     123.410  36.640  59.710  1.00  0.00           C
ATOM   1551  O   VAL A 394     123.050  35.470  59.580  1.00  0.00           O
ATOM   1552  N   MET A 395     124.700  36.960  59.660  1.00  0.00           N
ATOM   1553  H   MET A 395     125.010  37.910  59.780  1.00  0.00           H
ATOM   1554  CA  MET A 395     125.800  36.110  59.210  1.00  0.00           C
ATOM   1555  HA  MET A 395     125.620  35.030  59.200  1.00  0.00           H
ATOM   1556  CB  MET A 395     126.100  36.530  57.760  1.00  0.00           C
ATOM   1557  HB1 MET A 395     127.080  36.220  57.410  1.00  0.00           H
ATOM   1558  HB2 MET A 395     126.010  37.610  57.740  1.00  0.00           H
ATOM   1559  CG  MET A 395     125.130  35.890  56.830  1.00  0.00           C
ATOM   1560  HG1 MET A 395     124.100  35.990  57.180  1.00  0.00           H
ATOM   1561  HG2 MET A 395     125.300  34.820  56.700  1.00  0.00           H
ATOM   1562  SD  MET A 395     125.380  36.550  55.160  1.00  0.00           S
ATOM   1563  CE  MET A 395     124.030  35.710  54.290  1.00  0.00           C
ATOM   1564  HE1 MET A 395     124.380  34.670  54.280  1.00  0.00           H
ATOM   1565  HE2 MET A 395     123.080  35.850  54.800  1.00  0.00           H
ATOM   1566  HE3 MET A 395     123.920  36.160  53.310  1.00  0.00           H
ATOM   1567  C   MET A 395     127.160  36.300  59.930  1.00  0.00           C
ATOM   1568  O   MET A 395     127.460  37.370  60.610  1.00  0.00           O
ATOM   1569  N   GLU A 396     128.060  35.360  59.750  1.00  0.00           N
ATOM   1570  H   GLU A 396     127.770  34.580  59.180  1.00  0.00           H
ATOM   1571  CA  GLU A 396     129.470  35.500  60.210  1.00  0.00           C
ATOM   1572  HA  GLU A 396     129.420  35.770  61.260  1.00  0.00           H
ATOM   1573  CB  GLU A 396     130.150  34.150  60.010  1.00  0.00           C
ATOM   1574  HB1 GLU A 396     130.060  33.920  58.950  1.00  0.00           H
ATOM   1575  HB2 GLU A 396     129.530  33.450  60.570  1.00  0.00           H
ATOM   1576  CG  GLU A 396     131.580  34.120  60.530  1.00  0.00           C
ATOM   1577  HG1 GLU A 396     131.530  34.740  61.430  1.00  0.00           H
ATOM   1578  HG2 GLU A 396     132.160  34.680  59.800  1.00  0.00           H
ATOM   1579  CD  GLU A 396     132.030  32.710  60.980  1.00  0.00           C
ATOM   1580  OE1 GLU A 396     132.120  31.800  60.130  1.00  0.00           O
ATOM   1581  OE2 GLU A 396     132.360  32.630  62.180  1.00  0.00           O
ATOM   1582  C   GLU A 396     130.170  36.650  59.450  1.00  0.00           C
ATOM   1583  O   GLU A 396     130.280  36.720  58.210  1.00  0.00           O
ATOM   1584  N   PHE A 397     130.640  37.610  60.190  1.00  0.00           N
ATOM   1585  H   PHE A 397     130.620  37.570  61.190  1.00  0.00           H
ATOM   1586  CA  PHE A 397     131.610  38.610  59.700  1.00  0.00           C
ATOM   1587  HA  PHE A 397     131.200  38.890  58.730  1.00  0.00           H
ATOM   1588  CB  PHE A 397     131.630  39.820  60.660  1.00  0.00           C
ATOM   1589  HB1 PHE A 397     131.110  39.540  61.570  1.00  0.00           H
ATOM   1590  HB2 PHE A 397     130.960  40.460  60.100  1.00  0.00           H
ATOM   1591  CG  PHE A 397     132.940  40.490  60.940  1.00  0.00           C
ATOM   1592  CD1 PHE A 397     133.690  39.940  62.020  1.00  0.00           C
ATOM   1593  HD1 PHE A 397     133.290  39.080  62.540  1.00  0.00           H
ATOM   1594  CE1 PHE A 397     134.880  40.530  62.340  1.00  0.00           C
ATOM   1595  HE1 PHE A 397     135.460  40.200  63.190  1.00  0.00           H
ATOM   1596  CZ  PHE A 397     135.360  41.650  61.650  1.00  0.00           C
ATOM   1597  HZ  PHE A 397     136.340  42.000  61.940  1.00  0.00           H
ATOM   1598  CE2 PHE A 397     134.600  42.300  60.700  1.00  0.00           C
ATOM   1599  HE2 PHE A 397     134.880  43.260  60.280  1.00  0.00           H
ATOM   1600  CD2 PHE A 397     133.400  41.650  60.280  1.00  0.00           C
ATOM   1601  HD2 PHE A 397     132.770  42.180  59.580  1.00  0.00           H
ATOM   1602  C   PHE A 397     133.010  38.010  59.560  1.00  0.00           C
ATOM   1603  O   PHE A 397     133.490  37.250  60.390  1.00  0.00           O
ATOM   1604  N   LEU A 398     133.700  38.260  58.410  1.00  0.00           N
ATOM   1605  H   LEU A 398     133.190  38.760  57.690  1.00  0.00           H
ATOM   1606  CA  LEU A 398     135.000  37.720  57.960  1.00  0.00           C
ATOM   1607  HA  LEU A 398     135.470  37.030  58.660  1.00  0.00           H
ATOM   1608  CB  LEU A 398     134.670  36.950  56.750  1.00  0.00           C
ATOM   1609  HB1 LEU A 398     135.640  36.590  56.420  1.00  0.00           H
ATOM   1610  HB2 LEU A 398     134.330  37.700  56.030  1.00  0.00           H
ATOM   1611  CG  LEU A 398     133.760  35.770  56.810  1.00  0.00           C
ATOM   1612  HG  LEU A 398     132.760  36.150  57.000  1.00  0.00           H
ATOM   1613  CD1 LEU A 398     133.950  35.000  55.540  1.00  0.00           C
ATOM   1614 1HD1 LEU A 398     133.160  34.250  55.470  1.00  0.00           H
ATOM   1615 2HD1 LEU A 398     133.850  35.760  54.770  1.00  0.00           H
ATOM   1616 3HD1 LEU A 398     134.980  34.650  55.460  1.00  0.00           H
ATOM   1617  CD2 LEU A 398     134.150  34.810  57.950  1.00  0.00           C
ATOM   1618 1HD2 LEU A 398     133.410  34.010  57.920  1.00  0.00           H
ATOM   1619 2HD2 LEU A 398     135.190  34.520  57.880  1.00  0.00           H
ATOM   1620 3HD2 LEU A 398     133.960  35.290  58.910  1.00  0.00           H
ATOM   1621  C   LEU A 398     136.060  38.800  57.600  1.00  0.00           C
ATOM   1622  O   LEU A 398     135.760  39.830  56.950  1.00  0.00           O
ATOM   1623  N   GLU A 399     137.340  38.540  57.970  1.00  0.00           N
ATOM   1624  H   GLU A 399     137.500  37.700  58.510  1.00  0.00           H
ATOM   1625  CA  GLU A 399     138.410  39.510  57.790  1.00  0.00           C
ATOM   1626  HA  GLU A 399     137.980  40.490  57.990  1.00  0.00           H
ATOM   1627  CB  GLU A 399     139.530  39.270  58.900  1.00  0.00           C
ATOM   1628  HB1 GLU A 399     140.150  38.420  58.650  1.00  0.00           H
ATOM   1629  HB2 GLU A 399     139.060  39.220  59.880  1.00  0.00           H
ATOM   1630  CG  GLU A 399     140.620  40.340  59.200  1.00  0.00           C
ATOM   1631  HG1 GLU A 399     140.200  41.340  59.350  1.00  0.00           H
ATOM   1632  HG2 GLU A 399     141.340  40.480  58.400  1.00  0.00           H
ATOM   1633  CD  GLU A 399     141.490  40.060  60.410  1.00  0.00           C
ATOM   1634  OE1 GLU A 399     140.930  40.220  61.500  1.00  0.00           O
ATOM   1635  OE2 GLU A 399     142.690  39.700  60.290  1.00  0.00           O
ATOM   1636  C   GLU A 399     139.020  39.630  56.370  1.00  0.00           C
ATOM   1637  O   GLU A 399     139.860  40.560  56.150  1.00  0.00           O
ATOM   1638  N   GLY A 400     138.630  38.730  55.470  1.00  0.00           N
ATOM   1639  H   GLY A 400     137.990  37.980  55.710  1.00  0.00           H
ATOM   1640  CA  GLY A 400     138.900  39.070  54.030  1.00  0.00           C
ATOM   1641  HA1 GLY A 400     139.260  38.110  53.650  1.00  0.00           H
ATOM   1642  HA2 GLY A 400     139.760  39.730  53.980  1.00  0.00           H
ATOM   1643  C   GLY A 400     137.750  39.560  53.170  1.00  0.00           C
ATOM   1644  O   GLY A 400     138.080  39.910  51.980  1.00  0.00           O
ATOM   1645  N   GLY A 401     136.580  39.730  53.640  1.00  0.00           N
ATOM   1646  H   GLY A 401     136.330  39.550  54.610  1.00  0.00           H
ATOM   1647  CA  GLY A 401     135.660  40.430  52.750  1.00  0.00           C
ATOM   1648  HA1 GLY A 401     136.080  41.370  52.390  1.00  0.00           H
ATOM   1649  HA2 GLY A 401     134.730  40.650  53.290  1.00  0.00           H
ATOM   1650  C   GLY A 401     135.340  39.610  51.530  1.00  0.00           C
ATOM   1651  O   GLY A 401     135.260  38.400  51.560  1.00  0.00           O
ATOM   1652  N   ALA A 402     135.120  40.320  50.400  1.00  0.00           N
ATOM   1653  H   ALA A 402     135.320  41.310  50.420  1.00  0.00           H
ATOM   1654  CA  ALA A 402     134.850  39.720  49.060  1.00  0.00           C
ATOM   1655  HA  ALA A 402     134.570  38.670  49.080  1.00  0.00           H
ATOM   1656  CB  ALA A 402     133.610  40.440  48.410  1.00  0.00           C
ATOM   1657  HB1 ALA A 402     133.750  41.520  48.450  1.00  0.00           H
ATOM   1658  HB2 ALA A 402     133.380  40.130  47.390  1.00  0.00           H
ATOM   1659  HB3 ALA A 402     132.730  40.310  49.030  1.00  0.00           H
ATOM   1660  C   ALA A 402     136.050  39.670  48.110  1.00  0.00           C
ATOM   1661  O   ALA A 402     136.760  40.690  47.990  1.00  0.00           O
ATOM   1662  N   LEU A 403     136.300  38.570  47.400  1.00  0.00           N
ATOM   1663  H   LEU A 403     135.720  37.740  47.470  1.00  0.00           H
ATOM   1664  CA  LEU A 403     137.400  38.350  46.530  1.00  0.00           C
ATOM   1665  HA  LEU A 403     138.320  38.190  47.100  1.00  0.00           H
ATOM   1666  CB  LEU A 403     137.100  37.140  45.590  1.00  0.00           C
ATOM   1667  HB1 LEU A 403     136.220  37.430  45.020  1.00  0.00           H
ATOM   1668  HB2 LEU A 403     136.860  36.320  46.270  1.00  0.00           H
ATOM   1669  CG  LEU A 403     138.210  36.670  44.680  1.00  0.00           C
ATOM   1670  HG  LEU A 403     138.510  37.390  43.930  1.00  0.00           H
ATOM   1671  CD1 LEU A 403     139.490  36.230  45.490  1.00  0.00           C
ATOM   1672 1HD1 LEU A 403     139.920  37.040  46.080  1.00  0.00           H
ATOM   1673 2HD1 LEU A 403     139.290  35.390  46.150  1.00  0.00           H
ATOM   1674 3HD1 LEU A 403     140.270  35.830  44.830  1.00  0.00           H
ATOM   1675  CD2 LEU A 403     137.670  35.530  43.780  1.00  0.00           C
ATOM   1676 1HD2 LEU A 403     136.870  35.830  43.100  1.00  0.00           H
ATOM   1677 2HD2 LEU A 403     138.480  35.190  43.120  1.00  0.00           H
ATOM   1678 3HD2 LEU A 403     137.270  34.720  44.400  1.00  0.00           H
ATOM   1679  C   LEU A 403     137.590  39.580  45.540  1.00  0.00           C
ATOM   1680  O   LEU A 403     138.710  39.870  45.200  1.00  0.00           O
ATOM   1681  N   THR A 404     136.520  40.370  45.220  1.00  0.00           N
ATOM   1682  H   THR A 404     135.670  39.980  45.580  1.00  0.00           H
ATOM   1683  CA  THR A 404     136.490  41.560  44.340  1.00  0.00           C
ATOM   1684  HA  THR A 404     136.650  41.310  43.290  1.00  0.00           H
ATOM   1685  CB  THR A 404     135.050  42.140  44.480  1.00  0.00           C
ATOM   1686  HB  THR A 404     134.750  41.980  45.510  1.00  0.00           H
ATOM   1687  CG2 THR A 404     135.000  43.640  44.120  1.00  0.00           C
ATOM   1688 1HG2 THR A 404     134.110  44.070  44.570  1.00  0.00           H
ATOM   1689 2HG2 THR A 404     135.740  44.280  44.600  1.00  0.00           H
ATOM   1690 3HG2 THR A 404     134.920  43.740  43.040  1.00  0.00           H
ATOM   1691  OG1 THR A 404     134.140  41.500  43.590  1.00  0.00           O
ATOM   1692  HG1 THR A 404     133.350  42.020  43.460  1.00  0.00           H
ATOM   1693  C   THR A 404     137.510  42.570  44.920  1.00  0.00           C
ATOM   1694  O   THR A 404     138.130  43.180  44.080  1.00  0.00           O
ATOM   1695  N   ASP A 405     137.680  42.750  46.200  1.00  0.00           N
ATOM   1696  H   ASP A 405     137.140  42.190  46.850  1.00  0.00           H
ATOM   1697  CA  ASP A 405     138.610  43.720  46.690  1.00  0.00           C
ATOM   1698  HA  ASP A 405     138.370  44.710  46.290  1.00  0.00           H
ATOM   1699  CB  ASP A 405     138.520  43.780  48.200  1.00  0.00           C
ATOM   1700  HB1 ASP A 405     139.190  43.000  48.560  1.00  0.00           H
ATOM   1701  HB2 ASP A 405     137.460  43.670  48.410  1.00  0.00           H
ATOM   1702  CG  ASP A 405     138.820  45.110  48.860  1.00  0.00           C
ATOM   1703  OD1 ASP A 405     138.980  46.190  48.190  1.00  0.00           O
ATOM   1704  OD2 ASP A 405     138.810  45.160  50.090  1.00  0.00           O
ATOM   1705  C   ASP A 405     140.060  43.360  46.460  1.00  0.00           C
ATOM   1706  O   ASP A 405     140.870  44.260  46.360  1.00  0.00           O
ATOM   1707  N   ILE A 406     140.340  42.050  46.260  1.00  0.00           N
ATOM   1708  H   ILE A 406     139.550  41.420  46.360  1.00  0.00           H
ATOM   1709  CA  ILE A 406     141.560  41.490  45.610  1.00  0.00           C
ATOM   1710  HA  ILE A 406     142.340  42.080  46.080  1.00  0.00           H
ATOM   1711  CB  ILE A 406     141.940  40.060  45.860  1.00  0.00           C
ATOM   1712  HB  ILE A 406     141.110  39.450  45.510  1.00  0.00           H
ATOM   1713  CG2 ILE A 406     143.130  39.650  45.060  1.00  0.00           C
ATOM   1714 1HG2 ILE A 406     144.060  40.180  45.280  1.00  0.00           H
ATOM   1715 2HG2 ILE A 406     143.390  38.680  45.470  1.00  0.00           H
ATOM   1716 3HG2 ILE A 406     142.960  39.650  43.980  1.00  0.00           H
ATOM   1717  CG1 ILE A 406     142.210  39.910  47.400  1.00  0.00           C
ATOM   1718 1HG1 ILE A 406     142.180  38.870  47.700  1.00  0.00           H
ATOM   1719 2HG1 ILE A 406     141.330  40.280  47.900  1.00  0.00           H
ATOM   1720  CD  ILE A 406     143.400  40.690  48.010  1.00  0.00           C
ATOM   1721  HD1 ILE A 406     143.430  40.560  49.090  1.00  0.00           H
ATOM   1722  HD2 ILE A 406     144.320  40.330  47.550  1.00  0.00           H
ATOM   1723  HD3 ILE A 406     143.260  41.760  47.830  1.00  0.00           H
ATOM   1724  C   ILE A 406     141.570  41.760  44.120  1.00  0.00           C
ATOM   1725  O   ILE A 406     142.390  42.490  43.610  1.00  0.00           O
ATOM   1726  N   VAL A 407     140.530  41.210  43.360  1.00  0.00           N
ATOM   1727  H   VAL A 407     139.730  40.770  43.800  1.00  0.00           H
ATOM   1728  CA  VAL A 407     140.840  40.850  41.920  1.00  0.00           C
ATOM   1729  HA  VAL A 407     141.900  40.610  41.870  1.00  0.00           H
ATOM   1730  CB  VAL A 407     140.000  39.620  41.480  1.00  0.00           C
ATOM   1731  HB  VAL A 407     140.150  39.430  40.420  1.00  0.00           H
ATOM   1732  CG1 VAL A 407     140.550  38.300  42.130  1.00  0.00           C
ATOM   1733 1HG1 VAL A 407     140.900  38.390  43.160  1.00  0.00           H
ATOM   1734 2HG1 VAL A 407     139.810  37.500  42.060  1.00  0.00           H
ATOM   1735 3HG1 VAL A 407     141.460  38.050  41.590  1.00  0.00           H
ATOM   1736  CG2 VAL A 407     138.440  39.770  41.590  1.00  0.00           C
ATOM   1737 1HG2 VAL A 407     138.110  40.490  40.840  1.00  0.00           H
ATOM   1738 2HG2 VAL A 407     137.920  38.830  41.430  1.00  0.00           H
ATOM   1739 3HG2 VAL A 407     138.220  40.090  42.600  1.00  0.00           H
ATOM   1740  C   VAL A 407     140.630  42.050  40.930  1.00  0.00           C
ATOM   1741  O   VAL A 407     141.220  42.070  39.870  1.00  0.00           O
ATOM   1742  N   THR A 408     139.870  43.070  41.360  1.00  0.00           N
ATOM   1743  H   THR A 408     139.460  42.930  42.270  1.00  0.00           H
ATOM   1744  CA  THR A 408     139.730  44.340  40.690  1.00  0.00           C
ATOM   1745  HA  THR A 408     139.660  44.370  39.600  1.00  0.00           H
ATOM   1746  CB  THR A 408     138.490  45.090  41.100  1.00  0.00           C
ATOM   1747  HB  THR A 408     138.590  46.070  40.630  1.00  0.00           H
ATOM   1748  CG2 THR A 408     137.290  44.320  40.700  1.00  0.00           C
ATOM   1749 1HG2 THR A 408     137.260  44.150  39.620  1.00  0.00           H
ATOM   1750 2HG2 THR A 408     137.160  43.360  41.210  1.00  0.00           H
ATOM   1751 3HG2 THR A 408     136.390  44.900  40.910  1.00  0.00           H
ATOM   1752  OG1 THR A 408     138.540  45.380  42.490  1.00  0.00           O
ATOM   1753  HG1 THR A 408     138.370  44.570  42.990  1.00  0.00           H
ATOM   1754  C   THR A 408     140.950  45.250  40.960  1.00  0.00           C
ATOM   1755  O   THR A 408     141.120  46.230  40.190  1.00  0.00           O
ATOM   1756  N   HIS A 409     141.900  45.000  41.920  1.00  0.00           N
ATOM   1757  H   HIS A 409     141.680  44.250  42.560  1.00  0.00           H
ATOM   1758  CA  HIS A 409     142.990  45.920  42.280  1.00  0.00           C
ATOM   1759  HA  HIS A 409     142.850  46.850  41.730  1.00  0.00           H
ATOM   1760  CB  HIS A 409     142.870  46.250  43.780  1.00  0.00           C
ATOM   1761  HB1 HIS A 409     141.900  45.940  44.160  1.00  0.00           H
ATOM   1762  HB2 HIS A 409     142.910  47.330  43.850  1.00  0.00           H
ATOM   1763  CG  HIS A 409     143.920  45.630  44.690  1.00  0.00           C
ATOM   1764  ND1 HIS A 409     143.600  44.690  45.640  1.00  0.00           N
ATOM   1765  HD1 HIS A 409     142.670  44.340  45.820  1.00  0.00           H
ATOM   1766  CE1 HIS A 409     144.680  44.670  46.440  1.00  0.00           C
ATOM   1767  HE1 HIS A 409     144.780  44.050  47.330  1.00  0.00           H
ATOM   1768  NE2 HIS A 409     145.710  45.400  45.980  1.00  0.00           N
ATOM   1769  CD2 HIS A 409     145.240  46.020  44.850  1.00  0.00           C
ATOM   1770  HD2 HIS A 409     145.740  46.780  44.260  1.00  0.00           H
ATOM   1771  C   HIS A 409     144.320  45.410  41.880  1.00  0.00           C
ATOM   1772  O   HIS A 409     145.160  46.300  41.820  1.00  0.00           O
ATOM   1773  N   THR A 410     144.530  44.090  41.750  1.00  0.00           N
ATOM   1774  H   THR A 410     143.730  43.490  41.830  1.00  0.00           H
ATOM   1775  CA  THR A 410     145.820  43.470  41.480  1.00  0.00           C
ATOM   1776  HA  THR A 410     146.450  44.170  40.930  1.00  0.00           H
ATOM   1777  CB  THR A 410     146.580  43.220  42.840  1.00  0.00           C
ATOM   1778  HB  THR A 410     146.420  44.030  43.540  1.00  0.00           H
ATOM   1779  CG2 THR A 410     146.170  41.840  43.450  1.00  0.00           C
ATOM   1780 1HG2 THR A 410     145.110  41.830  43.690  1.00  0.00           H
ATOM   1781 2HG2 THR A 410     146.190  41.060  42.700  1.00  0.00           H
ATOM   1782 3HG2 THR A 410     146.850  41.600  44.270  1.00  0.00           H
ATOM   1783  OG1 THR A 410     147.890  43.030  42.460  1.00  0.00           O
ATOM   1784  HG1 THR A 410     148.270  43.890  42.290  1.00  0.00           H
ATOM   1785  C   THR A 410     145.520  42.230  40.640  1.00  0.00           C
ATOM   1786  O   THR A 410     144.330  41.860  40.500  1.00  0.00           O
ATOM   1787  N   ARG A 411     146.530  41.560  40.130  1.00  0.00           N
ATOM   1788  H   ARG A 411     147.430  42.000  40.280  1.00  0.00           H
ATOM   1789  CA  ARG A 411     146.400  40.320  39.410  1.00  0.00           C
ATOM   1790  HA  ARG A 411     145.340  40.170  39.240  1.00  0.00           H
ATOM   1791  CB  ARG A 411     147.070  40.410  37.990  1.00  0.00           C
ATOM   1792  HB1 ARG A 411     148.160  40.340  38.030  1.00  0.00           H
ATOM   1793  HB2 ARG A 411     146.810  41.350  37.480  1.00  0.00           H
ATOM   1794  CG  ARG A 411     146.700  39.240  37.170  1.00  0.00           C
ATOM   1795  HG1 ARG A 411     145.670  38.920  37.330  1.00  0.00           H
ATOM   1796  HG2 ARG A 411     147.380  38.400  37.350  1.00  0.00           H
ATOM   1797  CD  ARG A 411     146.740  39.490  35.650  1.00  0.00           C
ATOM   1798  HD1 ARG A 411     146.080  40.340  35.470  1.00  0.00           H
ATOM   1799  HD2 ARG A 411     146.300  38.670  35.080  1.00  0.00           H
ATOM   1800  NE  ARG A 411     148.040  39.950  35.230  1.00  0.00           N
ATOM   1801  HE  ARG A 411     148.130  40.930  35.010  1.00  0.00           H
ATOM   1802  CZ  ARG A 411     149.240  39.320  35.270  1.00  0.00           C
ATOM   1803  NH1 ARG A 411     149.350  38.040  35.310  1.00  0.00           N
ATOM   1804 1HH1 ARG A 411     148.500  37.510  35.410  1.00  0.00           H
ATOM   1805 2HH1 ARG A 411     150.240  37.560  35.300  1.00  0.00           H
ATOM   1806  NH2 ARG A 411     150.340  40.000  35.230  1.00  0.00           N
ATOM   1807 1HH2 ARG A 411     150.390  41.000  35.380  1.00  0.00           H
ATOM   1808 2HH2 ARG A 411     151.210  39.540  35.450  1.00  0.00           H
ATOM   1809  C   ARG A 411     146.990  39.270  40.280  1.00  0.00           C
ATOM   1810  O   ARG A 411     148.190  39.160  40.550  1.00  0.00           O
ATOM   1811  N   MET A 412     146.210  38.290  40.680  1.00  0.00           N
ATOM   1812  H   MET A 412     145.240  38.430  40.410  1.00  0.00           H
ATOM   1813  CA  MET A 412     146.490  37.150  41.560  1.00  0.00           C
ATOM   1814  HA  MET A 412     147.230  37.520  42.270  1.00  0.00           H
ATOM   1815  CB  MET A 412     145.230  36.800  42.330  1.00  0.00           C
ATOM   1816  HB1 MET A 412     144.660  36.370  41.510  1.00  0.00           H
ATOM   1817  HB2 MET A 412     144.790  37.740  42.670  1.00  0.00           H
ATOM   1818  CG  MET A 412     145.340  35.830  43.520  1.00  0.00           C
ATOM   1819  HG1 MET A 412     146.090  36.300  44.160  1.00  0.00           H
ATOM   1820  HG2 MET A 412     145.620  34.830  43.180  1.00  0.00           H
ATOM   1821  SD  MET A 412     143.920  35.690  44.600  1.00  0.00           S
ATOM   1822  CE  MET A 412     142.870  34.560  43.730  1.00  0.00           C
ATOM   1823  HE1 MET A 412     141.890  34.390  44.180  1.00  0.00           H
ATOM   1824  HE2 MET A 412     142.610  35.000  42.760  1.00  0.00           H
ATOM   1825  HE3 MET A 412     143.330  33.570  43.650  1.00  0.00           H
ATOM   1826  C   MET A 412     147.030  35.910  40.780  1.00  0.00           C
ATOM   1827  O   MET A 412     146.840  35.790  39.550  1.00  0.00           O
ATOM   1828  N   ASN A 413     147.950  35.210  41.420  1.00  0.00           N
ATOM   1829  H   ASN A 413     148.180  35.470  42.360  1.00  0.00           H
ATOM   1830  CA  ASN A 413     148.690  34.030  40.850  1.00  0.00           C
ATOM   1831  HA  ASN A 413     149.080  34.310  39.870  1.00  0.00           H
ATOM   1832  CB  ASN A 413     149.810  33.570  41.780  1.00  0.00           C
ATOM   1833  HB1 ASN A 413     149.560  33.350  42.810  1.00  0.00           H
ATOM   1834  HB2 ASN A 413     150.620  34.300  41.750  1.00  0.00           H
ATOM   1835  CG  ASN A 413     150.460  32.380  41.190  1.00  0.00           C
ATOM   1836  OD1 ASN A 413     151.090  32.430  40.160  1.00  0.00           O
ATOM   1837  ND2 ASN A 413     150.190  31.150  41.590  1.00  0.00           N
ATOM   1838 1HD2 ASN A 413     149.830  31.050  42.530  1.00  0.00           H
ATOM   1839 2HD2 ASN A 413     150.650  30.440  41.050  1.00  0.00           H
ATOM   1840  C   ASN A 413     147.790  32.840  40.490  1.00  0.00           C
ATOM   1841  O   ASN A 413     146.810  32.500  41.200  1.00  0.00           O
ATOM   1842  N   GLU A 414     147.990  32.120  39.390  1.00  0.00           N
ATOM   1843  H   GLU A 414     148.730  32.440  38.780  1.00  0.00           H
ATOM   1844  CA  GLU A 414     147.170  31.010  38.860  1.00  0.00           C
ATOM   1845  HA  GLU A 414     146.250  31.580  38.750  1.00  0.00           H
ATOM   1846  CB  GLU A 414     147.660  30.800  37.430  1.00  0.00           C
ATOM   1847  HB1 GLU A 414     148.240  31.670  37.130  1.00  0.00           H
ATOM   1848  HB2 GLU A 414     146.830  30.630  36.750  1.00  0.00           H
ATOM   1849  CG  GLU A 414     148.610  29.520  37.400  1.00  0.00           C
ATOM   1850  HG1 GLU A 414     148.090  28.580  37.590  1.00  0.00           H
ATOM   1851  HG2 GLU A 414     149.360  29.720  38.160  1.00  0.00           H
ATOM   1852  CD  GLU A 414     149.190  29.350  36.000  1.00  0.00           C
ATOM   1853  OE1 GLU A 414     149.990  30.190  35.530  1.00  0.00           O
ATOM   1854  OE2 GLU A 414     148.870  28.290  35.440  1.00  0.00           O
ATOM   1855  C   GLU A 414     146.910  29.790  39.750  1.00  0.00           C
ATOM   1856  O   GLU A 414     145.780  29.170  39.690  1.00  0.00           O
ATOM   1857  N   GLU A 415     147.900  29.460  40.620  1.00  0.00           N
ATOM   1858  H   GLU A 415     148.820  29.860  40.480  1.00  0.00           H
ATOM   1859  CA  GLU A 415     147.850  28.300  41.510  1.00  0.00           C
ATOM   1860  HA  GLU A 415     147.420  27.460  40.960  1.00  0.00           H
ATOM   1861  CB  GLU A 415     149.230  27.860  42.000  1.00  0.00           C
ATOM   1862  HB1 GLU A 415     149.080  27.300  42.920  1.00  0.00           H
ATOM   1863  HB2 GLU A 415     149.810  28.690  42.400  1.00  0.00           H
ATOM   1864  CG  GLU A 415     149.970  26.980  41.080  1.00  0.00           C
ATOM   1865  HG1 GLU A 415     149.350  26.180  40.660  1.00  0.00           H
ATOM   1866  HG2 GLU A 415     150.810  26.460  41.530  1.00  0.00           H
ATOM   1867  CD  GLU A 415     150.530  27.760  39.860  1.00  0.00           C
ATOM   1868  OE1 GLU A 415     150.420  27.240  38.760  1.00  0.00           O
ATOM   1869  OE2 GLU A 415     151.010  28.850  40.110  1.00  0.00           O
ATOM   1870  C   GLU A 415     146.830  28.590  42.650  1.00  0.00           C
ATOM   1871  O   GLU A 415     146.160  27.670  43.100  1.00  0.00           O
ATOM   1872  N   GLN A 416     146.570  29.880  42.860  1.00  0.00           N
ATOM   1873  H   GLN A 416     147.110  30.570  42.360  1.00  0.00           H
ATOM   1874  CA  GLN A 416     145.480  30.360  43.710  1.00  0.00           C
ATOM   1875  HA  GLN A 416     145.310  29.710  44.560  1.00  0.00           H
ATOM   1876  CB  GLN A 416     146.020  31.570  44.430  1.00  0.00           C
ATOM   1877  HB1 GLN A 416     145.250  32.070  45.000  1.00  0.00           H
ATOM   1878  HB2 GLN A 416     146.480  32.190  43.670  1.00  0.00           H
ATOM   1879  CG  GLN A 416     147.010  31.150  45.510  1.00  0.00           C
ATOM   1880  HG1 GLN A 416     146.600  30.300  46.050  1.00  0.00           H
ATOM   1881  HG2 GLN A 416     147.050  31.880  46.330  1.00  0.00           H
ATOM   1882  CD  GLN A 416     148.430  30.700  45.140  1.00  0.00           C
ATOM   1883  OE1 GLN A 416     149.000  31.240  44.230  1.00  0.00           O
ATOM   1884  NE2 GLN A 416     149.000  29.660  45.750  1.00  0.00           N
ATOM   1885 1HE2 GLN A 416     148.590  29.170  46.530  1.00  0.00           H
ATOM   1886 2HE2 GLN A 416     149.870  29.300  45.370  1.00  0.00           H
ATOM   1887  C   GLN A 416     144.170  30.690  43.050  1.00  0.00           C
ATOM   1888  O   GLN A 416     143.130  30.570  43.650  1.00  0.00           O
ATOM   1889  N   ILE A 417     144.130  30.930  41.730  1.00  0.00           N
ATOM   1890  H   ILE A 417     145.000  31.160  41.270  1.00  0.00           H
ATOM   1891  CA  ILE A 417     142.860  31.050  41.010  1.00  0.00           C
ATOM   1892  HA  ILE A 417     142.190  31.790  41.440  1.00  0.00           H
ATOM   1893  CB  ILE A 417     143.100  31.460  39.570  1.00  0.00           C
ATOM   1894  HB  ILE A 417     143.690  30.730  39.010  1.00  0.00           H
ATOM   1895  CG2 ILE A 417     141.710  31.370  38.820  1.00  0.00           C
ATOM   1896 1HG2 ILE A 417     141.070  32.000  39.440  1.00  0.00           H
ATOM   1897 2HG2 ILE A 417     141.730  31.900  37.870  1.00  0.00           H
ATOM   1898 3HG2 ILE A 417     141.350  30.360  38.690  1.00  0.00           H
ATOM   1899  CG1 ILE A 417     143.580  32.890  39.480  1.00  0.00           C
ATOM   1900 1HG1 ILE A 417     144.510  33.090  40.010  1.00  0.00           H
ATOM   1901 2HG1 ILE A 417     142.890  33.550  40.010  1.00  0.00           H
ATOM   1902  CD  ILE A 417     143.800  33.450  38.050  1.00  0.00           C
ATOM   1903  HD1 ILE A 417     144.410  32.860  37.360  1.00  0.00           H
ATOM   1904  HD2 ILE A 417     142.910  33.640  37.450  1.00  0.00           H
ATOM   1905  HD3 ILE A 417     144.310  34.410  38.100  1.00  0.00           H
ATOM   1906  C   ILE A 417     142.160  29.630  41.120  1.00  0.00           C
ATOM   1907  O   ILE A 417     140.960  29.420  41.350  1.00  0.00           O
ATOM   1908  N   ALA A 418     143.020  28.610  40.910  1.00  0.00           N
ATOM   1909  H   ALA A 418     144.010  28.770  40.760  1.00  0.00           H
ATOM   1910  CA  ALA A 418     142.660  27.230  41.080  1.00  0.00           C
ATOM   1911  HA  ALA A 418     141.860  27.090  40.350  1.00  0.00           H
ATOM   1912  CB  ALA A 418     143.820  26.350  40.610  1.00  0.00           C
ATOM   1913  HB1 ALA A 418     144.160  26.740  39.650  1.00  0.00           H
ATOM   1914  HB2 ALA A 418     144.620  26.430  41.340  1.00  0.00           H
ATOM   1915  HB3 ALA A 418     143.440  25.340  40.450  1.00  0.00           H
ATOM   1916  C   ALA A 418     142.240  26.840  42.470  1.00  0.00           C
ATOM   1917  O   ALA A 418     141.310  26.100  42.600  1.00  0.00           O
ATOM   1918  N   ALA A 419     142.890  27.420  43.470  1.00  0.00           N
ATOM   1919  H   ALA A 419     143.520  28.160  43.200  1.00  0.00           H
ATOM   1920  CA  ALA A 419     142.580  27.230  44.930  1.00  0.00           C
ATOM   1921  HA  ALA A 419     142.570  26.150  45.080  1.00  0.00           H
ATOM   1922  CB  ALA A 419     143.700  27.720  45.810  1.00  0.00           C
ATOM   1923  HB1 ALA A 419     143.610  27.310  46.810  1.00  0.00           H
ATOM   1924  HB2 ALA A 419     144.650  27.510  45.330  1.00  0.00           H
ATOM   1925  HB3 ALA A 419     143.690  28.810  45.830  1.00  0.00           H
ATOM   1926  C   ALA A 419     141.190  27.840  45.300  1.00  0.00           C
ATOM   1927  O   ALA A 419     140.370  27.200  45.970  1.00  0.00           O
ATOM   1928  N   VAL A 420     140.830  29.010  44.720  1.00  0.00           N
ATOM   1929  H   VAL A 420     141.510  29.480  44.140  1.00  0.00           H
ATOM   1930  CA  VAL A 420     139.460  29.560  44.770  1.00  0.00           C
ATOM   1931  HA  VAL A 420     139.090  29.520  45.790  1.00  0.00           H
ATOM   1932  CB  VAL A 420     139.380  30.960  44.210  1.00  0.00           C
ATOM   1933  HB  VAL A 420     139.810  30.950  43.210  1.00  0.00           H
ATOM   1934  CG1 VAL A 420     137.930  31.550  44.090  1.00  0.00           C
ATOM   1935 1HG1 VAL A 420     138.030  32.590  43.780  1.00  0.00           H
ATOM   1936 2HG1 VAL A 420     137.350  31.010  43.350  1.00  0.00           H
ATOM   1937 3HG1 VAL A 420     137.430  31.500  45.060  1.00  0.00           H
ATOM   1938  CG2 VAL A 420     140.180  31.940  44.980  1.00  0.00           C
ATOM   1939 1HG2 VAL A 420     141.220  31.640  45.120  1.00  0.00           H
ATOM   1940 2HG2 VAL A 420     140.100  32.930  44.530  1.00  0.00           H
ATOM   1941 3HG2 VAL A 420     139.620  32.020  45.920  1.00  0.00           H
ATOM   1942  C   VAL A 420     138.520  28.660  43.940  1.00  0.00           C
ATOM   1943  O   VAL A 420     137.440  28.310  44.430  1.00  0.00           O
ATOM   1944  N   CYS A 421     138.910  28.120  42.790  1.00  0.00           N
ATOM   1945  H   CYS A 421     139.780  28.480  42.430  1.00  0.00           H
ATOM   1946  CA  CYS A 421     138.040  27.320  41.960  1.00  0.00           C
ATOM   1947  HA  CYS A 421     137.050  27.760  41.850  1.00  0.00           H
ATOM   1948  CB  CYS A 421     138.640  27.250  40.630  1.00  0.00           C
ATOM   1949  HB1 CYS A 421     138.200  26.420  40.070  1.00  0.00           H
ATOM   1950  HB2 CYS A 421     139.710  27.090  40.710  1.00  0.00           H
ATOM   1951  SG  CYS A 421     138.420  28.830  39.720  1.00  0.00           S
ATOM   1952  HG  CYS A 421     139.000  29.570  40.670  1.00  0.00           H
ATOM   1953  C   CYS A 421     137.780  25.960  42.610  1.00  0.00           C
ATOM   1954  O   CYS A 421     136.670  25.410  42.540  1.00  0.00           O
ATOM   1955  N   LEU A 422     138.720  25.420  43.330  1.00  0.00           N
ATOM   1956  H   LEU A 422     139.620  25.850  43.460  1.00  0.00           H
ATOM   1957  CA  LEU A 422     138.560  24.170  44.040  1.00  0.00           C
ATOM   1958  HA  LEU A 422     138.300  23.430  43.280  1.00  0.00           H
ATOM   1959  CB  LEU A 422     139.920  23.690  44.570  1.00  0.00           C
ATOM   1960  HB1 LEU A 422     140.190  24.180  45.510  1.00  0.00           H
ATOM   1961  HB2 LEU A 422     140.700  23.960  43.850  1.00  0.00           H
ATOM   1962  CG  LEU A 422     140.130  22.200  44.960  1.00  0.00           C
ATOM   1963  HG  LEU A 422     139.660  21.500  44.280  1.00  0.00           H
ATOM   1964  CD1 LEU A 422     141.690  21.890  44.880  1.00  0.00           C
ATOM   1965 1HD1 LEU A 422     142.290  22.650  45.380  1.00  0.00           H
ATOM   1966 2HD1 LEU A 422     141.940  20.890  45.230  1.00  0.00           H
ATOM   1967 3HD1 LEU A 422     142.040  22.010  43.860  1.00  0.00           H
ATOM   1968  CD2 LEU A 422     139.670  21.820  46.340  1.00  0.00           C
ATOM   1969 1HD2 LEU A 422     140.280  22.190  47.170  1.00  0.00           H
ATOM   1970 2HD2 LEU A 422     138.640  22.150  46.520  1.00  0.00           H
ATOM   1971 3HD2 LEU A 422     139.670  20.740  46.370  1.00  0.00           H
ATOM   1972  C   LEU A 422     137.510  24.210  45.150  1.00  0.00           C
ATOM   1973  O   LEU A 422     136.570  23.390  45.110  1.00  0.00           O
ATOM   1974  N   ALA A 423     137.570  25.240  45.980  1.00  0.00           N
ATOM   1975  H   ALA A 423     138.310  25.920  45.850  1.00  0.00           H
ATOM   1976  CA  ALA A 423     136.540  25.570  47.020  1.00  0.00           C
ATOM   1977  HA  ALA A 423     136.450  24.730  47.720  1.00  0.00           H
ATOM   1978  CB  ALA A 423     137.020  26.820  47.730  1.00  0.00           C
ATOM   1979  HB1 ALA A 423     137.950  26.680  48.270  1.00  0.00           H
ATOM   1980  HB2 ALA A 423     137.200  27.600  46.990  1.00  0.00           H
ATOM   1981  HB3 ALA A 423     136.260  27.210  48.420  1.00  0.00           H
ATOM   1982  C   ALA A 423     135.150  25.700  46.400  1.00  0.00           C
ATOM   1983  O   ALA A 423     134.240  25.080  46.870  1.00  0.00           O
ATOM   1984  N   VAL A 424     134.990  26.460  45.320  1.00  0.00           N
ATOM   1985  H   VAL A 424     135.760  27.060  45.060  1.00  0.00           H
ATOM   1986  CA  VAL A 424     133.640  26.670  44.670  1.00  0.00           C
ATOM   1987  HA  VAL A 424     132.970  26.900  45.490  1.00  0.00           H
ATOM   1988  CB  VAL A 424     133.760  27.890  43.720  1.00  0.00           C
ATOM   1989  HB  VAL A 424     134.550  27.590  43.030  1.00  0.00           H
ATOM   1990  CG1 VAL A 424     132.400  28.120  42.950  1.00  0.00           C
ATOM   1991 1HG1 VAL A 424     132.270  27.330  42.210  1.00  0.00           H
ATOM   1992 2HG1 VAL A 424     131.520  28.230  43.580  1.00  0.00           H
ATOM   1993 3HG1 VAL A 424     132.330  29.070  42.430  1.00  0.00           H
ATOM   1994  CG2 VAL A 424     134.020  29.100  44.630  1.00  0.00           C
ATOM   1995 1HG2 VAL A 424     133.480  29.100  45.580  1.00  0.00           H
ATOM   1996 2HG2 VAL A 424     135.110  29.120  44.650  1.00  0.00           H
ATOM   1997 3HG2 VAL A 424     133.700  30.030  44.150  1.00  0.00           H
ATOM   1998  C   VAL A 424     133.110  25.430  43.970  1.00  0.00           C
ATOM   1999  O   VAL A 424     131.990  25.060  44.230  1.00  0.00           O
ATOM   2000  N   LEU A 425     133.950  24.670  43.320  1.00  0.00           N
ATOM   2001  H   LEU A 425     134.900  24.960  43.160  1.00  0.00           H
ATOM   2002  CA  LEU A 425     133.570  23.410  42.710  1.00  0.00           C
ATOM   2003  HA  LEU A 425     132.660  23.470  42.100  1.00  0.00           H
ATOM   2004  CB  LEU A 425     134.720  22.970  41.830  1.00  0.00           C
ATOM   2005  HB1 LEU A 425     134.670  21.900  41.680  1.00  0.00           H
ATOM   2006  HB2 LEU A 425     135.660  23.170  42.340  1.00  0.00           H
ATOM   2007  CG  LEU A 425     134.800  23.690  40.510  1.00  0.00           C
ATOM   2008  HG  LEU A 425     135.070  24.740  40.680  1.00  0.00           H
ATOM   2009  CD1 LEU A 425     136.010  23.130  39.770  1.00  0.00           C
ATOM   2010 1HD1 LEU A 425     136.920  23.080  40.370  1.00  0.00           H
ATOM   2011 2HD1 LEU A 425     135.750  22.100  39.530  1.00  0.00           H
ATOM   2012 3HD1 LEU A 425     136.200  23.740  38.890  1.00  0.00           H
ATOM   2013  CD2 LEU A 425     133.520  23.730  39.640  1.00  0.00           C
ATOM   2014 1HD2 LEU A 425     133.850  24.290  38.760  1.00  0.00           H
ATOM   2015 2HD2 LEU A 425     133.300  22.720  39.300  1.00  0.00           H
ATOM   2016 3HD2 LEU A 425     132.780  24.250  40.250  1.00  0.00           H
ATOM   2017  C   LEU A 425     133.180  22.320  43.740  1.00  0.00           C
ATOM   2018  O   LEU A 425     132.290  21.500  43.440  1.00  0.00           O
ATOM   2019  N   GLN A 426     133.750  22.330  44.980  1.00  0.00           N
ATOM   2020  H   GLN A 426     134.410  23.080  45.180  1.00  0.00           H
ATOM   2021  CA  GLN A 426     133.340  21.550  46.140  1.00  0.00           C
ATOM   2022  HA  GLN A 426     133.160  20.500  45.960  1.00  0.00           H
ATOM   2023  CB  GLN A 426     134.320  21.710  47.270  1.00  0.00           C
ATOM   2024  HB1 GLN A 426     133.800  21.490  48.190  1.00  0.00           H
ATOM   2025  HB2 GLN A 426     134.770  22.700  47.360  1.00  0.00           H
ATOM   2026  CG  GLN A 426     135.580  20.850  47.100  1.00  0.00           C
ATOM   2027  HG1 GLN A 426     136.370  21.370  47.650  1.00  0.00           H
ATOM   2028  HG2 GLN A 426     135.950  20.860  46.070  1.00  0.00           H
ATOM   2029  CD  GLN A 426     135.300  19.410  47.540  1.00  0.00           C
ATOM   2030  OE1 GLN A 426     134.340  18.830  47.090  1.00  0.00           O
ATOM   2031  NE2 GLN A 426     136.190  18.840  48.320  1.00  0.00           N
ATOM   2032 1HE2 GLN A 426     136.990  19.380  48.610  1.00  0.00           H
ATOM   2033 2HE2 GLN A 426     135.890  17.950  48.660  1.00  0.00           H
ATOM   2034  C   GLN A 426     131.940  22.050  46.640  1.00  0.00           C
ATOM   2035  O   GLN A 426     131.010  21.240  46.930  1.00  0.00           O
ATOM   2036  N   ALA A 427     131.720  23.360  46.800  1.00  0.00           N
ATOM   2037  H   ALA A 427     132.440  24.020  46.540  1.00  0.00           H
ATOM   2038  CA  ALA A 427     130.440  23.920  47.290  1.00  0.00           C
ATOM   2039  HA  ALA A 427     130.160  23.360  48.180  1.00  0.00           H
ATOM   2040  CB  ALA A 427     130.670  25.410  47.600  1.00  0.00           C
ATOM   2041  HB1 ALA A 427     129.820  25.880  48.100  1.00  0.00           H
ATOM   2042  HB2 ALA A 427     131.430  25.430  48.370  1.00  0.00           H
ATOM   2043  HB3 ALA A 427     131.040  25.940  46.730  1.00  0.00           H
ATOM   2044  C   ALA A 427     129.350  23.610  46.260  1.00  0.00           C
ATOM   2045  O   ALA A 427     128.360  22.930  46.600  1.00  0.00           O
ATOM   2046  N   LEU A 428     129.540  23.950  44.930  1.00  0.00           N
ATOM   2047  H   LEU A 428     130.390  24.460  44.750  1.00  0.00           H
ATOM   2048  CA  LEU A 428     128.630  23.520  43.880  1.00  0.00           C
ATOM   2049  HA  LEU A 428     127.650  23.930  44.140  1.00  0.00           H
ATOM   2050  CB  LEU A 428     129.020  24.070  42.480  1.00  0.00           C
ATOM   2051  HB1 LEU A 428     128.350  23.620  41.750  1.00  0.00           H
ATOM   2052  HB2 LEU A 428     129.970  23.650  42.170  1.00  0.00           H
ATOM   2053  CG  LEU A 428     129.080  25.510  42.150  1.00  0.00           C
ATOM   2054  HG  LEU A 428     129.780  25.990  42.840  1.00  0.00           H
ATOM   2055  CD1 LEU A 428     129.820  25.800  40.790  1.00  0.00           C
ATOM   2056 1HD1 LEU A 428     129.120  25.440  40.040  1.00  0.00           H
ATOM   2057 2HD1 LEU A 428     130.210  26.820  40.840  1.00  0.00           H
ATOM   2058 3HD1 LEU A 428     130.720  25.200  40.730  1.00  0.00           H
ATOM   2059  CD2 LEU A 428     127.780  26.330  42.250  1.00  0.00           C
ATOM   2060 1HD2 LEU A 428     127.350  25.940  43.170  1.00  0.00           H
ATOM   2061 2HD2 LEU A 428     128.140  27.360  42.180  1.00  0.00           H
ATOM   2062 3HD2 LEU A 428     127.160  25.930  41.450  1.00  0.00           H
ATOM   2063  C   LEU A 428     128.490  21.990  43.910  1.00  0.00           C
ATOM   2064  O   LEU A 428     127.330  21.540  43.760  1.00  0.00           O
ATOM   2065  N   SER A 429     129.550  21.190  44.250  1.00  0.00           N
ATOM   2066  H   SER A 429     130.510  21.440  44.440  1.00  0.00           H
ATOM   2067  CA  SER A 429     129.300  19.720  44.210  1.00  0.00           C
ATOM   2068  HA  SER A 429     128.940  19.540  43.190  1.00  0.00           H
ATOM   2069  CB  SER A 429     130.500  18.820  44.460  1.00  0.00           C
ATOM   2070  HB1 SER A 429     130.150  17.790  44.450  1.00  0.00           H
ATOM   2071  HB2 SER A 429     131.070  18.980  45.370  1.00  0.00           H
ATOM   2072  OG  SER A 429     131.410  18.930  43.340  1.00  0.00           O
ATOM   2073  HG  SER A 429     131.730  19.830  43.400  1.00  0.00           H
ATOM   2074  C   SER A 429     128.160  19.220  45.090  1.00  0.00           C
ATOM   2075  O   SER A 429     127.350  18.370  44.750  1.00  0.00           O
ATOM   2076  N   VAL A 430     127.960  19.830  46.320  1.00  0.00           N
ATOM   2077  H   VAL A 430     128.720  20.460  46.550  1.00  0.00           H
ATOM   2078  CA  VAL A 430     126.890  19.540  47.290  1.00  0.00           C
ATOM   2079  HA  VAL A 430     126.620  18.490  47.260  1.00  0.00           H
ATOM   2080  CB  VAL A 430     127.260  19.760  48.770  1.00  0.00           C
ATOM   2081  HB  VAL A 430     126.380  19.510  49.360  1.00  0.00           H
ATOM   2082  CG1 VAL A 430     128.220  18.580  49.080  1.00  0.00           C
ATOM   2083 1HG1 VAL A 430     129.060  18.540  48.390  1.00  0.00           H
ATOM   2084 2HG1 VAL A 430     128.650  18.670  50.080  1.00  0.00           H
ATOM   2085 3HG1 VAL A 430     127.690  17.630  49.070  1.00  0.00           H
ATOM   2086  CG2 VAL A 430     127.840  21.160  49.060  1.00  0.00           C
ATOM   2087 1HG2 VAL A 430     128.810  21.360  48.620  1.00  0.00           H
ATOM   2088 2HG2 VAL A 430     127.100  21.870  48.690  1.00  0.00           H
ATOM   2089 3HG2 VAL A 430     128.030  21.360  50.110  1.00  0.00           H
ATOM   2090  C   VAL A 430     125.570  20.180  46.930  1.00  0.00           C
ATOM   2091  O   VAL A 430     124.440  19.650  47.290  1.00  0.00           O
ATOM   2092  N   LEU A 431     125.610  21.340  46.270  1.00  0.00           N
ATOM   2093  H   LEU A 431     126.550  21.660  46.080  1.00  0.00           H
ATOM   2094  CA  LEU A 431     124.430  22.160  45.830  1.00  0.00           C
ATOM   2095  HA  LEU A 431     123.650  22.060  46.590  1.00  0.00           H
ATOM   2096  CB  LEU A 431     124.760  23.640  45.560  1.00  0.00           C
ATOM   2097  HB1 LEU A 431     123.910  24.240  45.230  1.00  0.00           H
ATOM   2098  HB2 LEU A 431     125.520  23.610  44.780  1.00  0.00           H
ATOM   2099  CG  LEU A 431     125.200  24.390  46.840  1.00  0.00           C
ATOM   2100  HG  LEU A 431     126.010  23.850  47.320  1.00  0.00           H
ATOM   2101  CD1 LEU A 431     125.800  25.670  46.440  1.00  0.00           C
ATOM   2102 1HD1 LEU A 431     126.570  25.340  45.740  1.00  0.00           H
ATOM   2103 2HD1 LEU A 431     124.950  26.220  46.050  1.00  0.00           H
ATOM   2104 3HD1 LEU A 431     126.220  26.150  47.320  1.00  0.00           H
ATOM   2105  CD2 LEU A 431     124.060  24.640  47.860  1.00  0.00           C
ATOM   2106 1HD2 LEU A 431     123.580  23.680  48.010  1.00  0.00           H
ATOM   2107 2HD2 LEU A 431     124.360  25.060  48.820  1.00  0.00           H
ATOM   2108 3HD2 LEU A 431     123.270  25.300  47.500  1.00  0.00           H
ATOM   2109  C   LEU A 431     123.740  21.480  44.660  1.00  0.00           C
ATOM   2110  O   LEU A 431     122.500  21.250  44.750  1.00  0.00           O
ATOM   2111  N   HIS A 432     124.510  20.930  43.670  1.00  0.00           N
ATOM   2112  H   HIS A 432     125.480  21.230  43.700  1.00  0.00           H
ATOM   2113  CA  HIS A 432     124.030  20.220  42.480  1.00  0.00           C
ATOM   2114  HA  HIS A 432     123.340  20.920  42.020  1.00  0.00           H
ATOM   2115  CB  HIS A 432     125.250  20.090  41.560  1.00  0.00           C
ATOM   2116  HB1 HIS A 432     124.770  19.500  40.780  1.00  0.00           H
ATOM   2117  HB2 HIS A 432     126.030  19.510  42.040  1.00  0.00           H
ATOM   2118  CG  HIS A 432     125.680  21.420  40.930  1.00  0.00           C
ATOM   2119  ND1 HIS A 432     126.350  21.570  39.760  1.00  0.00           N
ATOM   2120  CE1 HIS A 432     126.480  22.890  39.520  1.00  0.00           C
ATOM   2121  HE1 HIS A 432     127.060  23.340  38.720  1.00  0.00           H
ATOM   2122  NE2 HIS A 432     125.830  23.610  40.420  1.00  0.00           N
ATOM   2123  HE2 HIS A 432     125.560  24.570  40.230  1.00  0.00           H
ATOM   2124  CD2 HIS A 432     125.440  22.710  41.400  1.00  0.00           C
ATOM   2125  HD2 HIS A 432     124.950  22.910  42.340  1.00  0.00           H
ATOM   2126  C   HIS A 432     123.280  18.890  42.870  1.00  0.00           C
ATOM   2127  O   HIS A 432     122.340  18.580  42.150  1.00  0.00           O
ATOM   2128  N   ALA A 433     123.730  18.240  43.950  1.00  0.00           N
ATOM   2129  H   ALA A 433     124.640  18.450  44.340  1.00  0.00           H
ATOM   2130  CA  ALA A 433     123.080  16.990  44.490  1.00  0.00           C
ATOM   2131  HA  ALA A 433     122.830  16.400  43.610  1.00  0.00           H
ATOM   2132  CB  ALA A 433     124.080  16.180  45.280  1.00  0.00           C
ATOM   2133  HB1 ALA A 433     124.680  16.810  45.940  1.00  0.00           H
ATOM   2134  HB2 ALA A 433     123.550  15.430  45.880  1.00  0.00           H
ATOM   2135  HB3 ALA A 433     124.750  15.620  44.630  1.00  0.00           H
ATOM   2136  C   ALA A 433     121.770  17.330  45.240  1.00  0.00           C
ATOM   2137  O   ALA A 433     120.840  16.540  45.110  1.00  0.00           O
ATOM   2138  N   GLN A 434     121.600  18.520  45.860  1.00  0.00           N
ATOM   2139  H   GLN A 434     122.440  19.000  46.140  1.00  0.00           H
ATOM   2140  CA  GLN A 434     120.380  19.100  46.370  1.00  0.00           C
ATOM   2141  HA  GLN A 434     119.850  18.260  46.830  1.00  0.00           H
ATOM   2142  CB  GLN A 434     120.660  20.160  47.470  1.00  0.00           C
ATOM   2143  HB1 GLN A 434     119.750  20.730  47.700  1.00  0.00           H
ATOM   2144  HB2 GLN A 434     121.530  20.760  47.220  1.00  0.00           H
ATOM   2145  CG  GLN A 434     120.940  19.400  48.720  1.00  0.00           C
ATOM   2146  HG1 GLN A 434     121.790  18.740  48.530  1.00  0.00           H
ATOM   2147  HG2 GLN A 434     120.090  18.810  49.020  1.00  0.00           H
ATOM   2148  CD  GLN A 434     121.380  20.280  49.910  1.00  0.00           C
ATOM   2149  OE1 GLN A 434     122.520  20.560  50.150  1.00  0.00           O
ATOM   2150  NE2 GLN A 434     120.400  20.840  50.600  1.00  0.00           N
ATOM   2151 1HE2 GLN A 434     119.500  20.390  50.480  1.00  0.00           H
ATOM   2152 2HE2 GLN A 434     120.520  21.400  51.430  1.00  0.00           H
ATOM   2153  C   GLN A 434     119.470  19.710  45.210  1.00  0.00           C
ATOM   2154  O   GLN A 434     118.420  20.330  45.380  1.00  0.00           O
ATOM   2155  N   GLY A 435     119.930  19.540  43.970  1.00  0.00           N
ATOM   2156  H   GLY A 435     120.820  19.060  43.910  1.00  0.00           H
ATOM   2157  CA  GLY A 435     119.390  20.120  42.690  1.00  0.00           C
ATOM   2158  HA1 GLY A 435     118.360  19.850  42.470  1.00  0.00           H
ATOM   2159  HA2 GLY A 435     120.050  19.820  41.880  1.00  0.00           H
ATOM   2160  C   GLY A 435     119.370  21.600  42.690  1.00  0.00           C
ATOM   2161  O   GLY A 435     118.450  22.170  42.130  1.00  0.00           O
ATOM   2162  N   VAL A 436     120.190  22.290  43.520  1.00  0.00           N
ATOM   2163  H   VAL A 436     120.990  21.790  43.870  1.00  0.00           H
ATOM   2164  CA  VAL A 436     120.190  23.740  43.600  1.00  0.00           C
ATOM   2165  HA  VAL A 436     119.180  24.170  43.600  1.00  0.00           H
ATOM   2166  CB  VAL A 436     120.740  24.090  45.010  1.00  0.00           C
ATOM   2167  HB  VAL A 436     121.720  23.670  45.220  1.00  0.00           H
ATOM   2168  CG1 VAL A 436     120.810  25.600  45.110  1.00  0.00           C
ATOM   2169 1HG1 VAL A 436     121.560  26.040  44.450  1.00  0.00           H
ATOM   2170 2HG1 VAL A 436     119.830  26.050  44.930  1.00  0.00           H
ATOM   2171 3HG1 VAL A 436     121.100  25.850  46.130  1.00  0.00           H
ATOM   2172  CG2 VAL A 436     119.820  23.620  46.160  1.00  0.00           C
ATOM   2173 1HG2 VAL A 436     118.840  24.080  46.070  1.00  0.00           H
ATOM   2174 2HG2 VAL A 436     119.700  22.540  46.110  1.00  0.00           H
ATOM   2175 3HG2 VAL A 436     120.120  23.900  47.170  1.00  0.00           H
ATOM   2176  C   VAL A 436     121.090  24.360  42.510  1.00  0.00           C
ATOM   2177  O   VAL A 436     122.220  23.930  42.290  1.00  0.00           O
ATOM   2178  N   ILE A 437     120.530  25.390  41.860  1.00  0.00           N
ATOM   2179  H   ILE A 437     119.570  25.640  42.060  1.00  0.00           H
ATOM   2180  CA  ILE A 437     121.140  26.230  40.830  1.00  0.00           C
ATOM   2181  HA  ILE A 437     122.120  25.830  40.570  1.00  0.00           H
ATOM   2182  CB  ILE A 437     120.230  26.350  39.570  1.00  0.00           C
ATOM   2183  HB  ILE A 437     119.440  27.030  39.910  1.00  0.00           H
ATOM   2184  CG2 ILE A 437     121.060  26.990  38.460  1.00  0.00           C
ATOM   2185 1HG2 ILE A 437     121.880  26.350  38.150  1.00  0.00           H
ATOM   2186 2HG2 ILE A 437     120.390  27.280  37.650  1.00  0.00           H
ATOM   2187 3HG2 ILE A 437     121.470  27.980  38.680  1.00  0.00           H
ATOM   2188  CG1 ILE A 437     119.630  25.060  39.100  1.00  0.00           C
ATOM   2189 1HG1 ILE A 437     119.250  24.480  39.940  1.00  0.00           H
ATOM   2190 2HG1 ILE A 437     120.370  24.450  38.580  1.00  0.00           H
ATOM   2191  CD  ILE A 437     118.520  25.170  38.060  1.00  0.00           C
ATOM   2192  HD1 ILE A 437     118.360  24.180  37.640  1.00  0.00           H
ATOM   2193  HD2 ILE A 437     117.610  25.660  38.430  1.00  0.00           H
ATOM   2194  HD3 ILE A 437     118.760  25.840  37.240  1.00  0.00           H
ATOM   2195  C   ILE A 437     121.360  27.640  41.470  1.00  0.00           C
ATOM   2196  O   ILE A 437     120.400  28.270  41.970  1.00  0.00           O
ATOM   2197  N   HIS A 438     122.540  28.210  41.460  1.00  0.00           N
ATOM   2198  H   HIS A 438     123.360  27.740  41.090  1.00  0.00           H
ATOM   2199  CA  HIS A 438     122.930  29.370  42.390  1.00  0.00           C
ATOM   2200  HA  HIS A 438     122.260  29.410  43.250  1.00  0.00           H
ATOM   2201  CB  HIS A 438     124.350  29.200  42.890  1.00  0.00           C
ATOM   2202  HB1 HIS A 438     125.070  29.170  42.080  1.00  0.00           H
ATOM   2203  HB2 HIS A 438     124.350  28.290  43.500  1.00  0.00           H
ATOM   2204  CG  HIS A 438     124.780  30.350  43.780  1.00  0.00           C
ATOM   2205  ND1 HIS A 438     125.350  31.530  43.220  1.00  0.00           N
ATOM   2206  CE1 HIS A 438     125.720  32.330  44.210  1.00  0.00           C
ATOM   2207  HE1 HIS A 438     126.190  33.300  44.180  1.00  0.00           H
ATOM   2208  NE2 HIS A 438     125.290  31.780  45.420  1.00  0.00           N
ATOM   2209  HE2 HIS A 438     125.300  32.290  46.290  1.00  0.00           H
ATOM   2210  CD2 HIS A 438     124.760  30.530  45.120  1.00  0.00           C
ATOM   2211  HD2 HIS A 438     124.250  29.870  45.810  1.00  0.00           H
ATOM   2212  C   HIS A 438     122.720  30.660  41.640  1.00  0.00           C
ATOM   2213  O   HIS A 438     122.240  31.570  42.270  1.00  0.00           O
ATOM   2214  N   ARG A 439     123.100  30.690  40.370  1.00  0.00           N
ATOM   2215  H   ARG A 439     123.410  29.770  40.060  1.00  0.00           H
ATOM   2216  CA  ARG A 439     122.810  31.700  39.380  1.00  0.00           C
ATOM   2217  HA  ARG A 439     123.200  31.310  38.440  1.00  0.00           H
ATOM   2218  CB  ARG A 439     121.350  32.050  39.070  1.00  0.00           C
ATOM   2219  HB1 ARG A 439     121.330  32.880  38.360  1.00  0.00           H
ATOM   2220  HB2 ARG A 439     120.850  32.370  39.980  1.00  0.00           H
ATOM   2221  CG  ARG A 439     120.500  30.850  38.510  1.00  0.00           C
ATOM   2222  HG1 ARG A 439     120.360  30.120  39.300  1.00  0.00           H
ATOM   2223  HG2 ARG A 439     121.030  30.360  37.700  1.00  0.00           H
ATOM   2224  CD  ARG A 439     119.170  31.390  37.880  1.00  0.00           C
ATOM   2225  HD1 ARG A 439     118.710  30.610  37.280  1.00  0.00           H
ATOM   2226  HD2 ARG A 439     119.380  32.280  37.300  1.00  0.00           H
ATOM   2227  NE  ARG A 439     118.290  31.860  38.940  1.00  0.00           N
ATOM   2228  HE  ARG A 439     118.640  31.740  39.880  1.00  0.00           H
ATOM   2229  CZ  ARG A 439     116.960  31.990  38.800  1.00  0.00           C
ATOM   2230  NH1 ARG A 439     116.110  31.960  39.830  1.00  0.00           N
ATOM   2231 1HH1 ARG A 439     116.490  31.960  40.770  1.00  0.00           H
ATOM   2232 2HH1 ARG A 439     115.160  32.250  39.640  1.00  0.00           H
ATOM   2233  NH2 ARG A 439     116.490  32.410  37.660  1.00  0.00           N
ATOM   2234 1HH2 ARG A 439     117.180  32.700  36.980  1.00  0.00           H
ATOM   2235 2HH2 ARG A 439     115.490  32.450  37.520  1.00  0.00           H
ATOM   2236  C   ARG A 439     123.720  33.000  39.560  1.00  0.00           C
ATOM   2237  O   ARG A 439     124.110  33.560  38.530  1.00  0.00           O
ATOM   2238  N   ASP A 440     124.180  33.340  40.730  1.00  0.00           N
ATOM   2239  H   ASP A 440     123.960  32.680  41.470  1.00  0.00           H
ATOM   2240  CA  ASP A 440     124.820  34.670  41.070  1.00  0.00           C
ATOM   2241  HA  ASP A 440     124.680  35.320  40.210  1.00  0.00           H
ATOM   2242  CB  ASP A 440     124.000  35.290  42.200  1.00  0.00           C
ATOM   2243  HB1 ASP A 440     124.020  34.770  43.160  1.00  0.00           H
ATOM   2244  HB2 ASP A 440     122.960  35.290  41.870  1.00  0.00           H
ATOM   2245  CG  ASP A 440     124.280  36.730  42.530  1.00  0.00           C
ATOM   2246  OD1 ASP A 440     123.860  37.190  43.620  1.00  0.00           O
ATOM   2247  OD2 ASP A 440     124.610  37.590  41.660  1.00  0.00           O
ATOM   2248  C   ASP A 440     126.390  34.620  41.330  1.00  0.00           C
ATOM   2249  O   ASP A 440     126.890  35.470  42.010  1.00  0.00           O
ATOM   2250  N   ILE A 441     127.130  33.620  40.810  1.00  0.00           N
ATOM   2251  H   ILE A 441     126.670  32.890  40.280  1.00  0.00           H
ATOM   2252  CA  ILE A 441     128.550  33.350  40.940  1.00  0.00           C
ATOM   2253  HA  ILE A 441     128.680  33.440  42.020  1.00  0.00           H
ATOM   2254  CB  ILE A 441     128.960  32.000  40.320  1.00  0.00           C
ATOM   2255  HB  ILE A 441     128.500  31.960  39.330  1.00  0.00           H
ATOM   2256  CG2 ILE A 441     130.420  31.630  40.110  1.00  0.00           C
ATOM   2257 1HG2 ILE A 441     130.890  31.600  41.090  1.00  0.00           H
ATOM   2258 2HG2 ILE A 441     130.580  30.760  39.480  1.00  0.00           H
ATOM   2259 3HG2 ILE A 441     130.850  32.420  39.490  1.00  0.00           H
ATOM   2260  CG1 ILE A 441     128.210  30.800  41.010  1.00  0.00           C
ATOM   2261 1HG1 ILE A 441     128.330  29.900  40.400  1.00  0.00           H
ATOM   2262 2HG1 ILE A 441     127.160  31.070  41.120  1.00  0.00           H
ATOM   2263  CD  ILE A 441     128.780  30.410  42.440  1.00  0.00           C
ATOM   2264  HD1 ILE A 441     129.090  31.310  42.980  1.00  0.00           H
ATOM   2265  HD2 ILE A 441     127.960  29.840  42.870  1.00  0.00           H
ATOM   2266  HD3 ILE A 441     129.660  29.770  42.390  1.00  0.00           H
ATOM   2267  C   ILE A 441     129.310  34.540  40.280  1.00  0.00           C
ATOM   2268  O   ILE A 441     129.340  34.580  39.040  1.00  0.00           O
ATOM   2269  N   LYS A 442     129.990  35.320  41.080  1.00  0.00           N
ATOM   2270  H   LYS A 442     129.910  35.170  42.070  1.00  0.00           H
ATOM   2271  CA  LYS A 442     130.920  36.420  40.750  1.00  0.00           C
ATOM   2272  HA  LYS A 442     131.560  36.000  39.970  1.00  0.00           H
ATOM   2273  CB  LYS A 442     130.200  37.630  40.060  1.00  0.00           C
ATOM   2274  HB1 LYS A 442     129.580  37.170  39.290  1.00  0.00           H
ATOM   2275  HB2 LYS A 442     130.860  38.370  39.610  1.00  0.00           H
ATOM   2276  CG  LYS A 442     129.210  38.190  41.080  1.00  0.00           C
ATOM   2277  HG1 LYS A 442     129.770  38.770  41.810  1.00  0.00           H
ATOM   2278  HG2 LYS A 442     128.580  37.430  41.550  1.00  0.00           H
ATOM   2279  CD  LYS A 442     128.220  39.140  40.440  1.00  0.00           C
ATOM   2280  HD1 LYS A 442     127.680  38.670  39.620  1.00  0.00           H
ATOM   2281  HD2 LYS A 442     128.730  40.010  40.020  1.00  0.00           H
ATOM   2282  CE  LYS A 442     127.120  39.670  41.260  1.00  0.00           C
ATOM   2283  HE1 LYS A 442     127.440  40.300  42.100  1.00  0.00           H
ATOM   2284  HE2 LYS A 442     126.550  38.850  41.680  1.00  0.00           H
ATOM   2285  NZ  LYS A 442     126.220  40.510  40.470  1.00  0.00           N
ATOM   2286  HZ1 LYS A 442     126.780  41.310  40.230  1.00  0.00           H
ATOM   2287  HZ2 LYS A 442     125.960  40.040  39.610  1.00  0.00           H
ATOM   2288  HZ3 LYS A 442     125.480  40.870  41.060  1.00  0.00           H
ATOM   2289  C   LYS A 442     131.820  36.850  41.920  1.00  0.00           C
ATOM   2290  O   LYS A 442     131.520  36.370  42.970  1.00  0.00           O
ATOM   2291  N   SER A 443     132.900  37.550  41.820  1.00  0.00           N
ATOM   2292  H   SER A 443     133.190  37.790  40.880  1.00  0.00           H
ATOM   2293  CA  SER A 443     133.810  37.910  42.920  1.00  0.00           C
ATOM   2294  HA  SER A 443     134.130  36.980  43.390  1.00  0.00           H
ATOM   2295  CB  SER A 443     134.940  38.760  42.380  1.00  0.00           C
ATOM   2296  HB1 SER A 443     135.730  38.850  43.120  1.00  0.00           H
ATOM   2297  HB2 SER A 443     134.460  39.670  42.020  1.00  0.00           H
ATOM   2298  OG  SER A 443     135.460  38.140  41.270  1.00  0.00           O
ATOM   2299  HG  SER A 443     134.850  38.350  40.550  1.00  0.00           H
ATOM   2300  C   SER A 443     133.100  38.690  44.050  1.00  0.00           C
ATOM   2301  O   SER A 443     133.500  38.620  45.240  1.00  0.00           O
ATOM   2302  N   ASP A 444     131.910  39.230  43.790  1.00  0.00           N
ATOM   2303  H   ASP A 444     131.710  39.280  42.800  1.00  0.00           H
ATOM   2304  CA  ASP A 444     131.020  39.910  44.790  1.00  0.00           C
ATOM   2305  HA  ASP A 444     131.680  40.440  45.480  1.00  0.00           H
ATOM   2306  CB  ASP A 444     130.130  40.920  44.160  1.00  0.00           C
ATOM   2307  HB1 ASP A 444     129.520  41.380  44.940  1.00  0.00           H
ATOM   2308  HB2 ASP A 444     129.620  40.360  43.380  1.00  0.00           H
ATOM   2309  CG  ASP A 444     130.930  42.030  43.480  1.00  0.00           C
ATOM   2310  OD1 ASP A 444     130.700  42.280  42.280  1.00  0.00           O
ATOM   2311  OD2 ASP A 444     131.850  42.650  44.110  1.00  0.00           O
ATOM   2312  C   ASP A 444     130.270  38.950  45.710  1.00  0.00           C
ATOM   2313  O   ASP A 444     130.010  39.220  46.880  1.00  0.00           O
ATOM   2314  N   SER A 445     130.210  37.680  45.240  1.00  0.00           N
ATOM   2315  H   SER A 445     130.680  37.410  44.390  1.00  0.00           H
ATOM   2316  CA  SER A 445     129.480  36.590  45.970  1.00  0.00           C
ATOM   2317  HA  SER A 445     128.800  37.010  46.720  1.00  0.00           H
ATOM   2318  CB  SER A 445     128.510  35.890  44.980  1.00  0.00           C
ATOM   2319  HB1 SER A 445     127.850  35.200  45.500  1.00  0.00           H
ATOM   2320  HB2 SER A 445     129.130  35.390  44.230  1.00  0.00           H
ATOM   2321  OG  SER A 445     127.680  36.780  44.350  1.00  0.00           O
ATOM   2322  HG  SER A 445     127.300  36.230  43.660  1.00  0.00           H
ATOM   2323  C   SER A 445     130.440  35.640  46.650  1.00  0.00           C
ATOM   2324  O   SER A 445     130.030  34.700  47.330  1.00  0.00           O
ATOM   2325  N   ILE A 446     131.780  35.720  46.290  1.00  0.00           N
ATOM   2326  H   ILE A 446     132.110  36.480  45.720  1.00  0.00           H
ATOM   2327  CA  ILE A 446     132.830  34.920  46.970  1.00  0.00           C
ATOM   2328  HA  ILE A 446     132.310  34.100  47.470  1.00  0.00           H
ATOM   2329  CB  ILE A 446     133.730  34.250  45.970  1.00  0.00           C
ATOM   2330  HB  ILE A 446     134.420  34.980  45.540  1.00  0.00           H
ATOM   2331  CG2 ILE A 446     134.620  33.200  46.660  1.00  0.00           C
ATOM   2332 1HG2 ILE A 446     135.440  33.710  47.170  1.00  0.00           H
ATOM   2333 2HG2 ILE A 446     134.030  32.620  47.370  1.00  0.00           H
ATOM   2334 3HG2 ILE A 446     135.090  32.540  45.940  1.00  0.00           H
ATOM   2335  CG1 ILE A 446     133.140  33.660  44.640  1.00  0.00           C
ATOM   2336 1HG1 ILE A 446     133.870  33.240  43.960  1.00  0.00           H
ATOM   2337 2HG1 ILE A 446     132.780  34.520  44.080  1.00  0.00           H
ATOM   2338  CD  ILE A 446     132.050  32.580  44.970  1.00  0.00           C
ATOM   2339  HD1 ILE A 446     131.620  32.470  43.970  1.00  0.00           H
ATOM   2340  HD2 ILE A 446     132.460  31.720  45.500  1.00  0.00           H
ATOM   2341  HD3 ILE A 446     131.390  33.050  45.680  1.00  0.00           H
ATOM   2342  C   ILE A 446     133.550  35.700  48.100  1.00  0.00           C
ATOM   2343  O   ILE A 446     134.340  36.600  47.900  1.00  0.00           O
ATOM   2344  N   LEU A 447     133.330  35.250  49.350  1.00  0.00           N
ATOM   2345  H   LEU A 447     132.820  34.400  49.520  1.00  0.00           H
ATOM   2346  CA  LEU A 447     133.950  35.860  50.520  1.00  0.00           C
ATOM   2347  HA  LEU A 447     134.450  36.780  50.230  1.00  0.00           H
ATOM   2348  CB  LEU A 447     132.970  36.110  51.710  1.00  0.00           C
ATOM   2349  HB1 LEU A 447     133.540  36.670  52.450  1.00  0.00           H
ATOM   2350  HB2 LEU A 447     132.680  35.150  52.150  1.00  0.00           H
ATOM   2351  CG  LEU A 447     131.670  36.850  51.320  1.00  0.00           C
ATOM   2352  HG  LEU A 447     130.920  36.190  50.870  1.00  0.00           H
ATOM   2353  CD1 LEU A 447     131.080  37.410  52.600  1.00  0.00           C
ATOM   2354 1HD1 LEU A 447     130.050  37.770  52.500  1.00  0.00           H
ATOM   2355 2HD1 LEU A 447     131.030  36.680  53.400  1.00  0.00           H
ATOM   2356 3HD1 LEU A 447     131.630  38.270  52.990  1.00  0.00           H
ATOM   2357  CD2 LEU A 447     131.950  38.080  50.480  1.00  0.00           C
ATOM   2358 1HD2 LEU A 447     131.040  38.680  50.510  1.00  0.00           H
ATOM   2359 2HD2 LEU A 447     132.700  38.710  50.960  1.00  0.00           H
ATOM   2360 3HD2 LEU A 447     132.220  37.720  49.480  1.00  0.00           H
ATOM   2361  C   LEU A 447     135.150  35.040  50.980  1.00  0.00           C
ATOM   2362  O   LEU A 447     135.310  33.930  50.570  1.00  0.00           O
ATOM   2363  N   LEU A 448     136.030  35.680  51.780  1.00  0.00           N
ATOM   2364  H   LEU A 448     135.910  36.660  52.010  1.00  0.00           H
ATOM   2365  CA  LEU A 448     137.310  35.170  52.190  1.00  0.00           C
ATOM   2366  HA  LEU A 448     137.310  34.100  51.960  1.00  0.00           H
ATOM   2367  CB  LEU A 448     138.410  35.850  51.410  1.00  0.00           C
ATOM   2368  HB1 LEU A 448     139.400  35.490  51.690  1.00  0.00           H
ATOM   2369  HB2 LEU A 448     138.410  36.860  51.800  1.00  0.00           H
ATOM   2370  CG  LEU A 448     138.500  35.920  49.950  1.00  0.00           C
ATOM   2371  HG  LEU A 448     137.620  36.430  49.570  1.00  0.00           H
ATOM   2372  CD1 LEU A 448     139.640  36.850  49.580  1.00  0.00           C
ATOM   2373 1HD1 LEU A 448     140.560  36.380  49.920  1.00  0.00           H
ATOM   2374 2HD1 LEU A 448     139.570  37.070  48.520  1.00  0.00           H
ATOM   2375 3HD1 LEU A 448     139.410  37.860  49.940  1.00  0.00           H
ATOM   2376  CD2 LEU A 448     138.690  34.530  49.330  1.00  0.00           C
ATOM   2377 1HD2 LEU A 448     137.810  33.910  49.540  1.00  0.00           H
ATOM   2378 2HD2 LEU A 448     138.770  34.660  48.250  1.00  0.00           H
ATOM   2379 3HD2 LEU A 448     139.590  34.060  49.710  1.00  0.00           H
ATOM   2380  C   LEU A 448     137.480  35.270  53.690  1.00  0.00           C
ATOM   2381  O   LEU A 448     137.330  36.360  54.290  1.00  0.00           O
ATOM   2382  N   THR A 449     138.090  34.300  54.330  1.00  0.00           N
ATOM   2383  H   THR A 449     138.270  33.400  53.910  1.00  0.00           H
ATOM   2384  CA  THR A 449     138.490  34.460  55.770  1.00  0.00           C
ATOM   2385  HA  THR A 449     137.700  35.080  56.180  1.00  0.00           H
ATOM   2386  CB  THR A 449     138.520  33.080  56.430  1.00  0.00           C
ATOM   2387  HB  THR A 449     138.740  33.130  57.490  1.00  0.00           H
ATOM   2388  CG2 THR A 449     137.110  32.420  56.350  1.00  0.00           C
ATOM   2389 1HG2 THR A 449     136.420  33.200  56.670  1.00  0.00           H
ATOM   2390 2HG2 THR A 449     136.790  32.120  55.350  1.00  0.00           H
ATOM   2391 3HG2 THR A 449     136.840  31.620  57.040  1.00  0.00           H
ATOM   2392  OG1 THR A 449     139.470  32.290  55.750  1.00  0.00           O
ATOM   2393  HG1 THR A 449     139.830  31.820  56.510  1.00  0.00           H
ATOM   2394  C   THR A 449     139.840  35.180  56.060  1.00  0.00           C
ATOM   2395  O   THR A 449     140.680  35.450  55.180  1.00  0.00           O
ATOM   2396  N   HIS A 450     140.080  35.470  57.310  1.00  0.00           N
ATOM   2397  H   HIS A 450     139.290  35.290  57.910  1.00  0.00           H
ATOM   2398  CA  HIS A 450     141.230  35.960  57.950  1.00  0.00           C
ATOM   2399  HA  HIS A 450     141.600  36.910  57.570  1.00  0.00           H
ATOM   2400  CB  HIS A 450     140.830  36.120  59.500  1.00  0.00           C
ATOM   2401  HB1 HIS A 450     139.860  36.610  59.580  1.00  0.00           H
ATOM   2402  HB2 HIS A 450     141.470  36.850  59.990  1.00  0.00           H
ATOM   2403  CG  HIS A 450     140.790  34.830  60.250  1.00  0.00           C
ATOM   2404  ND1 HIS A 450     139.750  33.870  60.190  1.00  0.00           N
ATOM   2405  CE1 HIS A 450     140.180  32.900  61.040  1.00  0.00           C
ATOM   2406  HE1 HIS A 450     139.670  31.960  61.140  1.00  0.00           H
ATOM   2407  NE2 HIS A 450     141.420  33.130  61.440  1.00  0.00           N
ATOM   2408  HE2 HIS A 450     142.030  32.530  61.970  1.00  0.00           H
ATOM   2409  CD2 HIS A 450     141.830  34.400  61.010  1.00  0.00           C
ATOM   2410  HD2 HIS A 450     142.720  35.000  61.060  1.00  0.00           H
ATOM   2411  C   HIS A 450     142.400  34.920  57.880  1.00  0.00           C
ATOM   2412  O   HIS A 450     143.510  35.260  58.180  1.00  0.00           O
ATOM   2413  N   ASP A 451     142.170  33.650  57.500  1.00  0.00           N
ATOM   2414  H   ASP A 451     141.260  33.450  57.120  1.00  0.00           H
ATOM   2415  CA  ASP A 451     143.170  32.570  57.290  1.00  0.00           C
ATOM   2416  HA  ASP A 451     144.190  32.930  57.430  1.00  0.00           H
ATOM   2417  CB  ASP A 451     143.000  31.450  58.350  1.00  0.00           C
ATOM   2418  HB1 ASP A 451     143.430  31.780  59.300  1.00  0.00           H
ATOM   2419  HB2 ASP A 451     143.740  30.670  58.150  1.00  0.00           H
ATOM   2420  CG  ASP A 451     141.570  30.940  58.680  1.00  0.00           C
ATOM   2421  OD1 ASP A 451     140.640  31.170  57.860  1.00  0.00           O
ATOM   2422  OD2 ASP A 451     141.480  30.250  59.700  1.00  0.00           O
ATOM   2423  C   ASP A 451     143.160  32.000  55.850  1.00  0.00           C
ATOM   2424  O   ASP A 451     143.730  30.990  55.480  1.00  0.00           O
ATOM   2425  N   GLY A 452     142.500  32.700  54.980  1.00  0.00           N
ATOM   2426  H   GLY A 452     141.930  33.450  55.340  1.00  0.00           H
ATOM   2427  CA  GLY A 452     142.530  32.540  53.490  1.00  0.00           C
ATOM   2428  HA1 GLY A 452     143.550  32.340  53.180  1.00  0.00           H
ATOM   2429  HA2 GLY A 452     142.250  33.480  53.010  1.00  0.00           H
ATOM   2430  C   GLY A 452     141.640  31.440  52.880  1.00  0.00           C
ATOM   2431  O   GLY A 452     141.660  31.110  51.700  1.00  0.00           O
ATOM   2432  N   ARG A 453     140.830  30.710  53.710  1.00  0.00           N
ATOM   2433  H   ARG A 453     140.770  31.020  54.670  1.00  0.00           H
ATOM   2434  CA  ARG A 453     139.700  29.900  53.200  1.00  0.00           C
ATOM   2435  HA  ARG A 453     140.120  29.120  52.560  1.00  0.00           H
ATOM   2436  CB  ARG A 453     138.880  29.190  54.390  1.00  0.00           C
ATOM   2437  HB1 ARG A 453     137.950  28.770  54.030  1.00  0.00           H
ATOM   2438  HB2 ARG A 453     138.490  29.970  55.040  1.00  0.00           H
ATOM   2439  CG  ARG A 453     139.770  28.280  55.200  1.00  0.00           C
ATOM   2440  HG1 ARG A 453     140.730  28.710  55.490  1.00  0.00           H
ATOM   2441  HG2 ARG A 453     139.910  27.410  54.560  1.00  0.00           H
ATOM   2442  CD  ARG A 453     139.130  27.790  56.550  1.00  0.00           C
ATOM   2443  HD1 ARG A 453     139.800  27.030  56.930  1.00  0.00           H
ATOM   2444  HD2 ARG A 453     138.120  27.450  56.340  1.00  0.00           H
ATOM   2445  NE  ARG A 453     139.060  29.040  57.450  1.00  0.00           N
ATOM   2446  HE  ARG A 453     139.940  29.490  57.660  1.00  0.00           H
ATOM   2447  CZ  ARG A 453     138.080  29.290  58.270  1.00  0.00           C
ATOM   2448  NH1 ARG A 453     136.920  28.660  58.200  1.00  0.00           N
ATOM   2449 1HH1 ARG A 453     136.720  27.770  57.770  1.00  0.00           H
ATOM   2450 2HH1 ARG A 453     136.170  28.990  58.790  1.00  0.00           H
ATOM   2451  NH2 ARG A 453     138.240  30.290  59.080  1.00  0.00           N
ATOM   2452 1HH2 ARG A 453     138.980  30.920  58.840  1.00  0.00           H
ATOM   2453 2HH2 ARG A 453     137.510  30.500  59.740  1.00  0.00           H
ATOM   2454  C   ARG A 453     138.780  30.800  52.360  1.00  0.00           C
ATOM   2455  O   ARG A 453     138.690  31.980  52.600  1.00  0.00           O
ATOM   2456  N   VAL A 454     137.960  30.170  51.530  1.00  0.00           N
ATOM   2457  H   VAL A 454     138.030  29.160  51.530  1.00  0.00           H
ATOM   2458  CA  VAL A 454     137.180  30.710  50.390  1.00  0.00           C
ATOM   2459  HA  VAL A 454     137.150  31.800  50.400  1.00  0.00           H
ATOM   2460  CB  VAL A 454     137.760  30.250  49.010  1.00  0.00           C
ATOM   2461  HB  VAL A 454     137.840  29.170  48.950  1.00  0.00           H
ATOM   2462  CG1 VAL A 454     137.030  30.680  47.790  1.00  0.00           C
ATOM   2463 1HG1 VAL A 454     136.900  31.760  47.820  1.00  0.00           H
ATOM   2464 2HG1 VAL A 454     137.550  30.360  46.880  1.00  0.00           H
ATOM   2465 3HG1 VAL A 454     136.020  30.280  47.740  1.00  0.00           H
ATOM   2466  CG2 VAL A 454     139.210  30.760  48.820  1.00  0.00           C
ATOM   2467 1HG2 VAL A 454     139.930  30.210  49.430  1.00  0.00           H
ATOM   2468 2HG2 VAL A 454     139.680  30.490  47.870  1.00  0.00           H
ATOM   2469 3HG2 VAL A 454     139.350  31.810  49.080  1.00  0.00           H
ATOM   2470  C   VAL A 454     135.730  30.220  50.550  1.00  0.00           C
ATOM   2471  O   VAL A 454     135.520  28.950  50.630  1.00  0.00           O
ATOM   2472  N   LYS A 455     134.740  31.190  50.640  1.00  0.00           N
ATOM   2473  H   LYS A 455     134.990  32.160  50.550  1.00  0.00           H
ATOM   2474  CA  LYS A 455     133.380  30.820  50.910  1.00  0.00           C
ATOM   2475  HA  LYS A 455     133.210  29.760  50.740  1.00  0.00           H
ATOM   2476  CB  LYS A 455     133.120  31.040  52.380  1.00  0.00           C
ATOM   2477  HB1 LYS A 455     132.110  30.670  52.580  1.00  0.00           H
ATOM   2478  HB2 LYS A 455     133.210  32.100  52.630  1.00  0.00           H
ATOM   2479  CG  LYS A 455     134.030  30.250  53.340  1.00  0.00           C
ATOM   2480  HG1 LYS A 455     135.060  30.580  53.200  1.00  0.00           H
ATOM   2481  HG2 LYS A 455     133.960  29.160  53.330  1.00  0.00           H
ATOM   2482  CD  LYS A 455     133.630  30.630  54.770  1.00  0.00           C
ATOM   2483  HD1 LYS A 455     132.610  30.320  55.000  1.00  0.00           H
ATOM   2484  HD2 LYS A 455     133.630  31.720  54.810  1.00  0.00           H
ATOM   2485  CE  LYS A 455     134.560  29.880  55.760  1.00  0.00           C
ATOM   2486  HE1 LYS A 455     134.580  30.370  56.740  1.00  0.00           H
ATOM   2487  HE2 LYS A 455     135.610  29.900  55.480  1.00  0.00           H
ATOM   2488  NZ  LYS A 455     134.230  28.420  55.720  1.00  0.00           N
ATOM   2489  HZ1 LYS A 455     133.320  28.260  56.140  1.00  0.00           H
ATOM   2490  HZ2 LYS A 455     134.260  27.990  54.810  1.00  0.00           H
ATOM   2491  HZ3 LYS A 455     134.810  27.840  56.320  1.00  0.00           H
ATOM   2492  C   LYS A 455     132.320  31.570  50.050  1.00  0.00           C
ATOM   2493  O   LYS A 455     132.340  32.820  49.990  1.00  0.00           O
ATOM   2494  N   LEU A 456     131.390  30.790  49.470  1.00  0.00           N
ATOM   2495  H   LEU A 456     131.470  29.810  49.730  1.00  0.00           H
ATOM   2496  CA  LEU A 456     130.300  31.110  48.570  1.00  0.00           C
ATOM   2497  HA  LEU A 456     130.630  31.880  47.880  1.00  0.00           H
ATOM   2498  CB  LEU A 456     130.010  29.760  47.800  1.00  0.00           C
ATOM   2499  HB1 LEU A 456     129.960  28.890  48.440  1.00  0.00           H
ATOM   2500  HB2 LEU A 456     130.760  29.570  47.030  1.00  0.00           H
ATOM   2501  CG  LEU A 456     128.680  29.770  47.010  1.00  0.00           C
ATOM   2502  HG  LEU A 456     127.880  30.080  47.680  1.00  0.00           H
ATOM   2503  CD1 LEU A 456     128.720  30.740  45.850  1.00  0.00           C
ATOM   2504 1HD1 LEU A 456     129.400  30.380  45.080  1.00  0.00           H
ATOM   2505 2HD1 LEU A 456     127.690  30.900  45.530  1.00  0.00           H
ATOM   2506 3HD1 LEU A 456     129.020  31.760  46.060  1.00  0.00           H
ATOM   2507  CD2 LEU A 456     128.270  28.340  46.580  1.00  0.00           C
ATOM   2508 1HD2 LEU A 456     128.200  27.710  47.460  1.00  0.00           H
ATOM   2509 2HD2 LEU A 456     127.270  28.410  46.150  1.00  0.00           H
ATOM   2510 3HD2 LEU A 456     128.980  27.830  45.940  1.00  0.00           H
ATOM   2511  C   LEU A 456     129.080  31.650  49.350  1.00  0.00           C
ATOM   2512  O   LEU A 456     128.700  31.000  50.270  1.00  0.00           O
ATOM   2513  N   SER A 457     128.570  32.770  48.920  1.00  0.00           N
ATOM   2514  H   SER A 457     128.990  33.240  48.130  1.00  0.00           H
ATOM   2515  CA  SER A 457     127.580  33.480  49.780  1.00  0.00           C
ATOM   2516  HA  SER A 457     127.170  32.860  50.580  1.00  0.00           H
ATOM   2517  CB  SER A 457     128.300  34.730  50.350  1.00  0.00           C
ATOM   2518  HB1 SER A 457     128.170  35.500  49.590  1.00  0.00           H
ATOM   2519  HB2 SER A 457     129.290  34.420  50.680  1.00  0.00           H
ATOM   2520  OG  SER A 457     127.590  35.190  51.480  1.00  0.00           O
ATOM   2521  HG  SER A 457     127.720  36.130  51.630  1.00  0.00           H
ATOM   2522  C   SER A 457     126.320  33.830  48.930  1.00  0.00           C
ATOM   2523  O   SER A 457     126.210  33.480  47.740  1.00  0.00           O
ATOM   2524  N   ASP A 458     125.370  34.480  49.590  1.00  0.00           N
ATOM   2525  H   ASP A 458     125.690  34.850  50.480  1.00  0.00           H
ATOM   2526  CA  ASP A 458     124.100  35.080  49.000  1.00  0.00           C
ATOM   2527  HA  ASP A 458     123.450  35.270  49.860  1.00  0.00           H
ATOM   2528  CB  ASP A 458     124.460  36.450  48.320  1.00  0.00           C
ATOM   2529  HB1 ASP A 458     123.480  36.880  48.080  1.00  0.00           H
ATOM   2530  HB2 ASP A 458     124.920  36.290  47.350  1.00  0.00           H
ATOM   2531  CG  ASP A 458     125.430  37.420  49.120  1.00  0.00           C
ATOM   2532  OD1 ASP A 458     126.330  38.010  48.560  1.00  0.00           O
ATOM   2533  OD2 ASP A 458     125.250  37.680  50.360  1.00  0.00           O
ATOM   2534  C   ASP A 458     123.240  34.230  48.080  1.00  0.00           C
ATOM   2535  O   ASP A 458     123.430  34.070  46.870  1.00  0.00           O
ATOM   2536  N   PHE A 459     122.110  33.630  48.630  1.00  0.00           N
ATOM   2537  H   PHE A 459     121.890  33.850  49.590  1.00  0.00           H
ATOM   2538  CA  PHE A 459     121.290  32.670  47.920  1.00  0.00           C
ATOM   2539  HA  PHE A 459     121.820  32.420  47.000  1.00  0.00           H
ATOM   2540  CB  PHE A 459     121.170  31.370  48.780  1.00  0.00           C
ATOM   2541  HB1 PHE A 459     120.280  30.840  48.440  1.00  0.00           H
ATOM   2542  HB2 PHE A 459     121.220  31.680  49.820  1.00  0.00           H
ATOM   2543  CG  PHE A 459     122.440  30.460  48.750  1.00  0.00           C
ATOM   2544  CD1 PHE A 459     123.570  30.900  49.480  1.00  0.00           C
ATOM   2545  HD1 PHE A 459     123.580  31.890  49.920  1.00  0.00           H
ATOM   2546  CE1 PHE A 459     124.800  30.200  49.390  1.00  0.00           C
ATOM   2547  HE1 PHE A 459     125.730  30.630  49.730  1.00  0.00           H
ATOM   2548  CZ  PHE A 459     124.780  28.930  48.750  1.00  0.00           C
ATOM   2549  HZ  PHE A 459     125.660  28.310  48.670  1.00  0.00           H
ATOM   2550  CE2 PHE A 459     123.640  28.440  48.130  1.00  0.00           C
ATOM   2551  HE2 PHE A 459     123.630  27.430  47.760  1.00  0.00           H
ATOM   2552  CD2 PHE A 459     122.450  29.180  48.210  1.00  0.00           C
ATOM   2553  HD2 PHE A 459     121.510  28.800  47.820  1.00  0.00           H
ATOM   2554  C   PHE A 459     119.910  33.180  47.440  1.00  0.00           C
ATOM   2555  O   PHE A 459     119.150  32.450  46.830  1.00  0.00           O
ATOM   2556  N   GLY A 460     119.650  34.480  47.570  1.00  0.00           N
ATOM   2557  H   GLY A 460     120.410  35.020  47.960  1.00  0.00           H
ATOM   2558  CA  GLY A 460     118.410  35.170  47.110  1.00  0.00           C
ATOM   2559  HA1 GLY A 460     118.400  36.190  47.480  1.00  0.00           H
ATOM   2560  HA2 GLY A 460     117.520  34.730  47.560  1.00  0.00           H
ATOM   2561  C   GLY A 460     118.190  35.140  45.590  1.00  0.00           C
ATOM   2562  O   GLY A 460     117.290  35.860  45.140  1.00  0.00           O
ATOM   2563  N   PHE A 461     118.950  34.400  44.750  1.00  0.00           N
ATOM   2564  H   PHE A 461     119.870  34.130  45.080  1.00  0.00           H
ATOM   2565  CA  PHE A 461     118.630  34.320  43.330  1.00  0.00           C
ATOM   2566  HA  PHE A 461     117.730  34.860  43.010  1.00  0.00           H
ATOM   2567  CB  PHE A 461     119.610  35.260  42.530  1.00  0.00           C
ATOM   2568  HB1 PHE A 461     120.570  34.750  42.520  1.00  0.00           H
ATOM   2569  HB2 PHE A 461     119.720  36.190  43.100  1.00  0.00           H
ATOM   2570  CG  PHE A 461     119.130  35.650  41.200  1.00  0.00           C
ATOM   2571  CD1 PHE A 461     119.930  35.370  40.060  1.00  0.00           C
ATOM   2572  HD1 PHE A 461     120.830  34.770  40.100  1.00  0.00           H
ATOM   2573  CE1 PHE A 461     119.490  35.730  38.790  1.00  0.00           C
ATOM   2574  HE1 PHE A 461     120.010  35.480  37.870  1.00  0.00           H
ATOM   2575  CZ  PHE A 461     118.210  36.340  38.620  1.00  0.00           C
ATOM   2576  HZ  PHE A 461     117.790  36.570  37.650  1.00  0.00           H
ATOM   2577  CE2 PHE A 461     117.450  36.620  39.780  1.00  0.00           C
ATOM   2578  HE2 PHE A 461     116.460  37.040  39.700  1.00  0.00           H
ATOM   2579  CD2 PHE A 461     117.940  36.400  41.040  1.00  0.00           C
ATOM   2580  HD2 PHE A 461     117.380  36.680  41.930  1.00  0.00           H
ATOM   2581  C   PHE A 461     118.650  32.850  42.800  1.00  0.00           C
ATOM   2582  O   PHE A 461     118.610  32.540  41.600  1.00  0.00           O
ATOM   2583  N   CYS A 462     118.750  31.950  43.750  1.00  0.00           N
ATOM   2584  H   CYS A 462     118.890  32.220  44.710  1.00  0.00           H
ATOM   2585  CA  CYS A 462     118.710  30.510  43.430  1.00  0.00           C
ATOM   2586  HA  CYS A 462     119.560  30.280  42.780  1.00  0.00           H
ATOM   2587  CB  CYS A 462     118.960  29.710  44.700  1.00  0.00           C
ATOM   2588  HB1 CYS A 462     118.990  28.680  44.350  1.00  0.00           H
ATOM   2589  HB2 CYS A 462     118.160  29.970  45.380  1.00  0.00           H
ATOM   2590  SG  CYS A 462     120.570  30.080  45.470  1.00  0.00           S
ATOM   2591  HG  CYS A 462     120.190  31.320  45.810  1.00  0.00           H
ATOM   2592  C   CYS A 462     117.410  30.060  42.730  1.00  0.00           C
ATOM   2593  O   CYS A 462     116.340  30.750  42.720  1.00  0.00           O
ATOM   2594  N   ALA A 463     117.440  28.820  42.260  1.00  0.00           N
ATOM   2595  H   ALA A 463     118.310  28.310  42.210  1.00  0.00           H
ATOM   2596  CA  ALA A 463     116.350  27.960  41.770  1.00  0.00           C
ATOM   2597  HA  ALA A 463     115.400  28.160  42.260  1.00  0.00           H
ATOM   2598  CB  ALA A 463     116.120  28.160  40.290  1.00  0.00           C
ATOM   2599  HB1 ALA A 463     115.130  27.810  40.010  1.00  0.00           H
ATOM   2600  HB2 ALA A 463     116.070  29.210  40.010  1.00  0.00           H
ATOM   2601  HB3 ALA A 463     116.830  27.560  39.730  1.00  0.00           H
ATOM   2602  C   ALA A 463     116.690  26.490  42.120  1.00  0.00           C
ATOM   2603  O   ALA A 463     117.810  26.170  42.470  1.00  0.00           O
ATOM   2604  N   GLN A 464     115.670  25.650  42.140  1.00  0.00           N
ATOM   2605  H   GLN A 464     114.760  25.950  41.800  1.00  0.00           H
ATOM   2606  CA  GLN A 464     115.830  24.290  42.530  1.00  0.00           C
ATOM   2607  HA  GLN A 464     116.870  24.050  42.310  1.00  0.00           H
ATOM   2608  CB  GLN A 464     115.340  24.160  44.000  1.00  0.00           C
ATOM   2609  HB1 GLN A 464     114.250  24.120  44.050  1.00  0.00           H
ATOM   2610  HB2 GLN A 464     115.680  25.090  44.470  1.00  0.00           H
ATOM   2611  CG  GLN A 464     116.090  22.970  44.600  1.00  0.00           C
ATOM   2612  HG1 GLN A 464     117.150  23.200  44.460  1.00  0.00           H
ATOM   2613  HG2 GLN A 464     115.960  22.060  44.020  1.00  0.00           H
ATOM   2614  CD  GLN A 464     115.870  22.750  46.110  1.00  0.00           C
ATOM   2615  OE1 GLN A 464     114.910  23.300  46.660  1.00  0.00           O
ATOM   2616  NE2 GLN A 464     116.600  21.850  46.770  1.00  0.00           N
ATOM   2617 1HE2 GLN A 464     117.260  21.380  46.180  1.00  0.00           H
ATOM   2618 2HE2 GLN A 464     116.410  21.420  47.670  1.00  0.00           H
ATOM   2619  C   GLN A 464     115.170  23.340  41.560  1.00  0.00           C
ATOM   2620  O   GLN A 464     114.040  23.520  41.120  1.00  0.00           O
ATOM   2621  N   VAL A 465     115.890  22.250  41.170  1.00  0.00           N
ATOM   2622  H   VAL A 465     116.790  22.070  41.600  1.00  0.00           H
ATOM   2623  CA  VAL A 465     115.320  21.110  40.450  1.00  0.00           C
ATOM   2624  HA  VAL A 465     114.260  21.360  40.350  1.00  0.00           H
ATOM   2625  CB  VAL A 465     116.020  20.810  39.120  1.00  0.00           C
ATOM   2626  HB  VAL A 465     115.540  19.930  38.680  1.00  0.00           H
ATOM   2627  CG1 VAL A 465     115.790  21.960  38.040  1.00  0.00           C
ATOM   2628 1HG1 VAL A 465     116.170  22.930  38.360  1.00  0.00           H
ATOM   2629 2HG1 VAL A 465     116.440  21.830  37.170  1.00  0.00           H
ATOM   2630 3HG1 VAL A 465     114.750  22.110  37.740  1.00  0.00           H
ATOM   2631  CG2 VAL A 465     117.580  20.540  39.210  1.00  0.00           C
ATOM   2632 1HG2 VAL A 465     117.730  19.670  39.850  1.00  0.00           H
ATOM   2633 2HG2 VAL A 465     117.910  20.160  38.240  1.00  0.00           H
ATOM   2634 3HG2 VAL A 465     118.120  21.430  39.530  1.00  0.00           H
ATOM   2635  C   VAL A 465     115.220  19.840  41.360  1.00  0.00           C
ATOM   2636  O   VAL A 465     115.990  19.630  42.320  1.00  0.00           O
ATOM   2637  N   SER A 466     114.300  18.940  41.020  1.00  0.00           N
ATOM   2638  H   SER A 466     113.720  19.110  40.210  1.00  0.00           H
ATOM   2639  CA  SER A 466     114.050  17.630  41.680  1.00  0.00           C
ATOM   2640  HA  SER A 466     114.910  17.310  42.280  1.00  0.00           H
ATOM   2641  CB  SER A 466     112.760  17.760  42.560  1.00  0.00           C
ATOM   2642  HB1 SER A 466     112.910  18.600  43.240  1.00  0.00           H
ATOM   2643  HB2 SER A 466     112.740  16.910  43.240  1.00  0.00           H
ATOM   2644  OG  SER A 466     111.620  17.940  41.740  1.00  0.00           O
ATOM   2645  HG  SER A 466     111.120  18.650  42.150  1.00  0.00           H
ATOM   2646  C   SER A 466     113.830  16.560  40.650  1.00  0.00           C
ATOM   2647  O   SER A 466     113.630  16.850  39.420  1.00  0.00           O
ATOM   2648  N   LYS A 467     113.580  15.310  41.120  1.00  0.00           N
ATOM   2649  H   LYS A 467     113.750  15.190  42.110  1.00  0.00           H
ATOM   2650  CA  LYS A 467     113.120  14.260  40.270  1.00  0.00           C
ATOM   2651  HA  LYS A 467     113.800  14.240  39.420  1.00  0.00           H
ATOM   2652  CB  LYS A 467     113.150  12.870  40.920  1.00  0.00           C
ATOM   2653  HB1 LYS A 467     112.580  12.270  40.210  1.00  0.00           H
ATOM   2654  HB2 LYS A 467     112.740  12.870  41.930  1.00  0.00           H
ATOM   2655  CG  LYS A 467     114.550  12.320  41.000  1.00  0.00           C
ATOM   2656  HG1 LYS A 467     115.100  12.970  41.670  1.00  0.00           H
ATOM   2657  HG2 LYS A 467     114.960  12.270  39.980  1.00  0.00           H
ATOM   2658  CD  LYS A 467     114.610  10.910  41.630  1.00  0.00           C
ATOM   2659  HD1 LYS A 467     114.070  10.240  40.950  1.00  0.00           H
ATOM   2660  HD2 LYS A 467     114.060  10.910  42.570  1.00  0.00           H
ATOM   2661  CE  LYS A 467     116.010  10.310  41.910  1.00  0.00           C
ATOM   2662  HE1 LYS A 467     116.690  10.220  41.060  1.00  0.00           H
ATOM   2663  HE2 LYS A 467     115.900   9.350  42.410  1.00  0.00           H
ATOM   2664  NZ  LYS A 467     116.830  11.070  42.890  1.00  0.00           N
ATOM   2665  HZ1 LYS A 467     116.340  11.450  43.680  1.00  0.00           H
ATOM   2666  HZ2 LYS A 467     117.580  10.510  43.250  1.00  0.00           H
ATOM   2667  HZ3 LYS A 467     117.170  11.850  42.350  1.00  0.00           H
ATOM   2668  C   LYS A 467     111.610  14.420  39.660  1.00  0.00           C
ATOM   2669  O   LYS A 467     111.160  13.540  38.900  1.00  0.00           O
ATOM   2670  N   GLU A 468     110.950  15.550  39.930  1.00  0.00           N
ATOM   2671  H   GLU A 468     111.370  16.200  40.580  1.00  0.00           H
ATOM   2672  CA  GLU A 468     109.600  15.780  39.440  1.00  0.00           C
ATOM   2673  HA  GLU A 468     109.220  14.960  38.820  1.00  0.00           H
ATOM   2674  CB  GLU A 468     108.670  15.770  40.620  1.00  0.00           C
ATOM   2675  HB1 GLU A 468     107.650  16.070  40.360  1.00  0.00           H
ATOM   2676  HB2 GLU A 468     108.940  16.500  41.390  1.00  0.00           H
ATOM   2677  CG  GLU A 468     108.600  14.400  41.280  1.00  0.00           C
ATOM   2678  HG1 GLU A 468     109.550  14.020  41.640  1.00  0.00           H
ATOM   2679  HG2 GLU A 468     108.240  13.650  40.570  1.00  0.00           H
ATOM   2680  CD  GLU A 468     107.660  14.440  42.410  1.00  0.00           C
ATOM   2681  OE1 GLU A 468     106.580  13.900  42.240  1.00  0.00           O
ATOM   2682  OE2 GLU A 468     107.980  15.040  43.490  1.00  0.00           O
ATOM   2683  C   GLU A 468     109.440  17.060  38.590  1.00  0.00           C
ATOM   2684  O   GLU A 468     108.720  17.110  37.570  1.00  0.00           O
ATOM   2685  N   VAL A 469     110.220  18.070  38.990  1.00  0.00           N
ATOM   2686  H   VAL A 469     110.690  18.080  39.890  1.00  0.00           H
ATOM   2687  CA  VAL A 469     110.510  19.370  38.300  1.00  0.00           C
ATOM   2688  HA  VAL A 469     110.000  19.450  37.340  1.00  0.00           H
ATOM   2689  CB  VAL A 469     110.100  20.550  39.210  1.00  0.00           C
ATOM   2690  HB  VAL A 469     110.730  20.810  40.070  1.00  0.00           H
ATOM   2691  CG1 VAL A 469     110.110  21.870  38.370  1.00  0.00           C
ATOM   2692 1HG1 VAL A 469     111.150  22.150  38.210  1.00  0.00           H
ATOM   2693 2HG1 VAL A 469     109.510  21.660  37.480  1.00  0.00           H
ATOM   2694 3HG1 VAL A 469     109.710  22.660  39.000  1.00  0.00           H
ATOM   2695  CG2 VAL A 469     108.700  20.470  39.960  1.00  0.00           C
ATOM   2696 1HG2 VAL A 469     108.670  19.640  40.660  1.00  0.00           H
ATOM   2697 2HG2 VAL A 469     108.440  21.410  40.440  1.00  0.00           H
ATOM   2698 3HG2 VAL A 469     107.900  20.280  39.230  1.00  0.00           H
ATOM   2699  C   VAL A 469     111.980  19.450  38.010  1.00  0.00           C
ATOM   2700  O   VAL A 469     112.770  20.040  38.750  1.00  0.00           O
ATOM   2701  N   PRO A 470     112.390  18.750  36.960  1.00  0.00           N
ATOM   2702  CD  PRO A 470     111.600  17.990  36.020  1.00  0.00           C
ATOM   2703  HD1 PRO A 470     110.860  18.610  35.520  1.00  0.00           H
ATOM   2704  HD2 PRO A 470     111.190  17.130  36.550  1.00  0.00           H
ATOM   2705  CG  PRO A 470     112.580  17.390  35.040  1.00  0.00           C
ATOM   2706  HG1 PRO A 470     112.690  18.080  34.200  1.00  0.00           H
ATOM   2707  HG2 PRO A 470     112.270  16.460  34.550  1.00  0.00           H
ATOM   2708  CB  PRO A 470     113.790  17.180  35.920  1.00  0.00           C
ATOM   2709  HB1 PRO A 470     114.720  17.100  35.350  1.00  0.00           H
ATOM   2710  HB2 PRO A 470     113.710  16.270  36.520  1.00  0.00           H
ATOM   2711  CA  PRO A 470     113.830  18.580  36.650  1.00  0.00           C
ATOM   2712  HA  PRO A 470     114.270  18.520  37.650  1.00  0.00           H
ATOM   2713  C   PRO A 470     114.600  19.670  35.880  1.00  0.00           C
ATOM   2714  O   PRO A 470     115.830  19.560  35.770  1.00  0.00           O
ATOM   2715  N   ARG A 471     113.900  20.650  35.330  1.00  0.00           N
ATOM   2716  H   ARG A 471     112.910  20.810  35.430  1.00  0.00           H
ATOM   2717  CA  ARG A 471     114.570  21.920  34.730  1.00  0.00           C
ATOM   2718  HA  ARG A 471     115.610  22.050  35.030  1.00  0.00           H
ATOM   2719  CB  ARG A 471     114.530  21.870  33.160  1.00  0.00           C
ATOM   2720  HB1 ARG A 471     115.160  22.690  32.820  1.00  0.00           H
ATOM   2721  HB2 ARG A 471     113.520  22.070  32.800  1.00  0.00           H
ATOM   2722  CG  ARG A 471     115.050  20.600  32.470  1.00  0.00           C
ATOM   2723  HG1 ARG A 471     115.010  20.810  31.400  1.00  0.00           H
ATOM   2724  HG2 ARG A 471     114.410  19.830  32.900  1.00  0.00           H
ATOM   2725  CD  ARG A 471     116.490  20.240  32.770  1.00  0.00           C
ATOM   2726  HD1 ARG A 471     116.670  19.160  32.700  1.00  0.00           H
ATOM   2727  HD2 ARG A 471     116.730  20.610  33.760  1.00  0.00           H
ATOM   2728  NE  ARG A 471     117.430  20.910  31.760  1.00  0.00           N
ATOM   2729  HE  ARG A 471     117.010  21.310  30.930  1.00  0.00           H
ATOM   2730  CZ  ARG A 471     118.740  20.940  31.840  1.00  0.00           C
ATOM   2731  NH1 ARG A 471     119.430  20.270  32.680  1.00  0.00           N
ATOM   2732 1HH1 ARG A 471     119.000  19.770  33.440  1.00  0.00           H
ATOM   2733 2HH1 ARG A 471     120.410  20.450  32.830  1.00  0.00           H
ATOM   2734  NH2 ARG A 471     119.390  21.670  30.940  1.00  0.00           N
ATOM   2735 1HH2 ARG A 471     118.880  21.860  30.090  1.00  0.00           H
ATOM   2736 2HH2 ARG A 471     120.390  21.800  30.970  1.00  0.00           H
ATOM   2737  C   ARG A 471     113.870  23.220  35.150  1.00  0.00           C
ATOM   2738  O   ARG A 471     112.730  23.030  35.500  1.00  0.00           O
ATOM   2739  N   ARG A 472     114.460  24.400  35.010  1.00  0.00           N
ATOM   2740  H   ARG A 472     115.460  24.360  34.860  1.00  0.00           H
ATOM   2741  CA  ARG A 472     113.730  25.630  35.280  1.00  0.00           C
ATOM   2742  HA  ARG A 472     112.680  25.360  35.330  1.00  0.00           H
ATOM   2743  CB  ARG A 472     114.270  26.290  36.470  1.00  0.00           C
ATOM   2744  HB1 ARG A 472     113.800  27.270  36.530  1.00  0.00           H
ATOM   2745  HB2 ARG A 472     115.340  26.460  36.330  1.00  0.00           H
ATOM   2746  CG  ARG A 472     114.040  25.550  37.800  1.00  0.00           C
ATOM   2747  HG1 ARG A 472     114.590  26.010  38.620  1.00  0.00           H
ATOM   2748  HG2 ARG A 472     114.360  24.510  37.760  1.00  0.00           H
ATOM   2749  CD  ARG A 472     112.480  25.670  38.110  1.00  0.00           C
ATOM   2750  HD1 ARG A 472     111.920  25.130  37.350  1.00  0.00           H
ATOM   2751  HD2 ARG A 472     112.180  26.710  38.240  1.00  0.00           H
ATOM   2752  NE  ARG A 472     112.110  24.900  39.310  1.00  0.00           N
ATOM   2753  HE  ARG A 472     112.840  24.360  39.740  1.00  0.00           H
ATOM   2754  CZ  ARG A 472     111.080  25.090  40.110  1.00  0.00           C
ATOM   2755  NH1 ARG A 472     110.160  25.990  39.960  1.00  0.00           N
ATOM   2756 1HH1 ARG A 472     110.000  26.530  39.120  1.00  0.00           H
ATOM   2757 2HH1 ARG A 472     109.520  25.970  40.750  1.00  0.00           H
ATOM   2758  NH2 ARG A 472     111.140  24.360  41.190  1.00  0.00           N
ATOM   2759 1HH2 ARG A 472     111.970  23.830  41.420  1.00  0.00           H
ATOM   2760 2HH2 ARG A 472     110.430  24.440  41.910  1.00  0.00           H
ATOM   2761  C   ARG A 472     113.770  26.520  34.020  1.00  0.00           C
ATOM   2762  O   ARG A 472     114.620  26.340  33.160  1.00  0.00           O
ATOM   2763  N   LYS A 473     112.850  27.480  33.860  1.00  0.00           N
ATOM   2764  H   LYS A 473     112.210  27.770  34.580  1.00  0.00           H
ATOM   2765  CA  LYS A 473     112.810  28.440  32.670  1.00  0.00           C
ATOM   2766  HA  LYS A 473     113.770  28.400  32.150  1.00  0.00           H
ATOM   2767  CB  LYS A 473     111.790  27.900  31.580  1.00  0.00           C
ATOM   2768  HB1 LYS A 473     110.790  27.900  32.020  1.00  0.00           H
ATOM   2769  HB2 LYS A 473     112.060  26.890  31.270  1.00  0.00           H
ATOM   2770  CG  LYS A 473     111.880  28.740  30.320  1.00  0.00           C
ATOM   2771  HG1 LYS A 473     112.860  28.650  29.840  1.00  0.00           H
ATOM   2772  HG2 LYS A 473     111.560  29.760  30.530  1.00  0.00           H
ATOM   2773  CD  LYS A 473     110.780  28.210  29.410  1.00  0.00           C
ATOM   2774  HD1 LYS A 473     109.780  28.430  29.810  1.00  0.00           H
ATOM   2775  HD2 LYS A 473     110.870  27.140  29.210  1.00  0.00           H
ATOM   2776  CE  LYS A 473     111.020  28.790  27.960  1.00  0.00           C
ATOM   2777  HE1 LYS A 473     110.320  28.370  27.230  1.00  0.00           H
ATOM   2778  HE2 LYS A 473     112.010  28.460  27.640  1.00  0.00           H
ATOM   2779  NZ  LYS A 473     110.880  30.310  27.860  1.00  0.00           N
ATOM   2780  HZ1 LYS A 473     110.930  30.590  26.890  1.00  0.00           H
ATOM   2781  HZ2 LYS A 473     109.960  30.650  28.090  1.00  0.00           H
ATOM   2782  HZ3 LYS A 473     111.510  30.840  28.450  1.00  0.00           H
ATOM   2783  C   LYS A 473     112.430  29.840  33.250  1.00  0.00           C
ATOM   2784  O   LYS A 473     111.460  29.880  34.050  1.00  0.00           O
ATOM   2785  N   SER A 474     113.120  30.930  32.790  1.00  0.00           N
ATOM   2786  H   SER A 474     113.870  30.770  32.130  1.00  0.00           H
ATOM   2787  CA  SER A 474     113.030  32.230  33.470  1.00  0.00           C
ATOM   2788  HA  SER A 474     112.070  32.260  33.990  1.00  0.00           H
ATOM   2789  CB  SER A 474     114.120  32.410  34.500  1.00  0.00           C
ATOM   2790  HB1 SER A 474     113.900  33.280  35.120  1.00  0.00           H
ATOM   2791  HB2 SER A 474     115.060  32.620  33.990  1.00  0.00           H
ATOM   2792  OG  SER A 474     114.200  31.310  35.390  1.00  0.00           O
ATOM   2793  HG  SER A 474     113.350  31.110  35.780  1.00  0.00           H
ATOM   2794  C   SER A 474     113.100  33.480  32.550  1.00  0.00           C
ATOM   2795  O   SER A 474     113.710  33.530  31.440  1.00  0.00           O
ATOM   2796  N   LEU A 475     112.610  34.640  33.000  1.00  0.00           N
ATOM   2797  H   LEU A 475     112.240  34.600  33.940  1.00  0.00           H
ATOM   2798  CA  LEU A 475     112.770  35.950  32.300  1.00  0.00           C
ATOM   2799  HA  LEU A 475     113.580  35.880  31.570  1.00  0.00           H
ATOM   2800  CB  LEU A 475     111.430  36.350  31.670  1.00  0.00           C
ATOM   2801  HB1 LEU A 475     111.550  37.360  31.300  1.00  0.00           H
ATOM   2802  HB2 LEU A 475     110.650  36.440  32.430  1.00  0.00           H
ATOM   2803  CG  LEU A 475     110.950  35.420  30.550  1.00  0.00           C
ATOM   2804  HG  LEU A 475     110.960  34.380  30.890  1.00  0.00           H
ATOM   2805  CD1 LEU A 475     109.430  35.730  30.380  1.00  0.00           C
ATOM   2806 1HD1 LEU A 475     109.350  36.770  30.050  1.00  0.00           H
ATOM   2807 2HD1 LEU A 475     109.060  34.980  29.680  1.00  0.00           H
ATOM   2808 3HD1 LEU A 475     108.890  35.730  31.320  1.00  0.00           H
ATOM   2809  CD2 LEU A 475     111.640  35.600  29.190  1.00  0.00           C
ATOM   2810 1HD2 LEU A 475     112.680  35.300  29.250  1.00  0.00           H
ATOM   2811 2HD2 LEU A 475     111.130  34.920  28.500  1.00  0.00           H
ATOM   2812 3HD2 LEU A 475     111.520  36.630  28.850  1.00  0.00           H
ATOM   2813  C   LEU A 475     113.450  37.010  33.220  1.00  0.00           C
ATOM   2814  O   LEU A 475     113.470  38.210  32.780  1.00  0.00           O
ATOM   2815  N   VAL A 476     114.140  36.580  34.280  1.00  0.00           N
ATOM   2816  H   VAL A 476     114.130  35.590  34.490  1.00  0.00           H
ATOM   2817  CA  VAL A 476     115.170  37.450  35.000  1.00  0.00           C
ATOM   2818  HA  VAL A 476     115.120  38.430  34.530  1.00  0.00           H
ATOM   2819  CB  VAL A 476     114.640  37.620  36.420  1.00  0.00           C
ATOM   2820  HB  VAL A 476     115.160  38.450  36.910  1.00  0.00           H
ATOM   2821  CG1 VAL A 476     113.190  38.060  36.430  1.00  0.00           C
ATOM   2822 1HG1 VAL A 476     112.660  38.060  37.390  1.00  0.00           H
ATOM   2823 2HG1 VAL A 476     113.140  39.070  36.030  1.00  0.00           H
ATOM   2824 3HG1 VAL A 476     112.560  37.440  35.790  1.00  0.00           H
ATOM   2825  CG2 VAL A 476     114.640  36.310  37.140  1.00  0.00           C
ATOM   2826 1HG2 VAL A 476     114.010  35.580  36.630  1.00  0.00           H
ATOM   2827 2HG2 VAL A 476     115.670  35.960  37.230  1.00  0.00           H
ATOM   2828 3HG2 VAL A 476     114.190  36.430  38.130  1.00  0.00           H
ATOM   2829  C   VAL A 476     116.600  36.920  34.940  1.00  0.00           C
ATOM   2830  O   VAL A 476     116.800  35.730  34.650  1.00  0.00           O
ATOM   2831  N   GLY A 477     117.590  37.810  35.170  1.00  0.00           N
ATOM   2832  H   GLY A 477     117.290  38.760  35.310  1.00  0.00           H
ATOM   2833  CA  GLY A 477     119.010  37.450  35.140  1.00  0.00           C
ATOM   2834  HA1 GLY A 477     119.260  36.530  34.600  1.00  0.00           H
ATOM   2835  HA2 GLY A 477     119.450  37.380  36.130  1.00  0.00           H
ATOM   2836  C   GLY A 477     119.710  38.560  34.390  1.00  0.00           C
ATOM   2837  O   GLY A 477     119.110  39.300  33.600  1.00  0.00           O
ATOM   2838  N   THR A 478     121.010  38.680  34.540  1.00  0.00           N
ATOM   2839  H   THR A 478     121.320  37.950  35.160  1.00  0.00           H
ATOM   2840  CA  THR A 478     121.860  39.700  33.960  1.00  0.00           C
ATOM   2841  HA  THR A 478     121.270  40.460  33.460  1.00  0.00           H
ATOM   2842  CB  THR A 478     122.710  40.310  34.980  1.00  0.00           C
ATOM   2843  HB  THR A 478     123.410  39.620  35.460  1.00  0.00           H
ATOM   2844  CG2 THR A 478     123.400  41.500  34.440  1.00  0.00           C
ATOM   2845 1HG2 THR A 478     123.860  42.050  35.270  1.00  0.00           H
ATOM   2846 2HG2 THR A 478     124.190  41.170  33.780  1.00  0.00           H
ATOM   2847 3HG2 THR A 478     122.650  42.150  33.980  1.00  0.00           H
ATOM   2848  OG1 THR A 478     121.890  40.810  35.980  1.00  0.00           O
ATOM   2849  HG1 THR A 478     122.420  41.230  36.670  1.00  0.00           H
ATOM   2850  C   THR A 478     122.730  39.060  32.880  1.00  0.00           C
ATOM   2851  O   THR A 478     123.490  38.120  33.190  1.00  0.00           O
ATOM   2852  N   PRO A 479     122.730  39.580  31.680  1.00  0.00           N
ATOM   2853  CD  PRO A 479     121.920  40.680  31.200  1.00  0.00           C
ATOM   2854  HD1 PRO A 479     121.830  41.540  31.860  1.00  0.00           H
ATOM   2855  HD2 PRO A 479     120.880  40.380  31.080  1.00  0.00           H
ATOM   2856  CG  PRO A 479     122.570  41.140  29.890  1.00  0.00           C
ATOM   2857  HG1 PRO A 479     123.370  41.830  30.180  1.00  0.00           H
ATOM   2858  HG2 PRO A 479     121.900  41.670  29.210  1.00  0.00           H
ATOM   2859  CB  PRO A 479     123.160  39.870  29.240  1.00  0.00           C
ATOM   2860  HB1 PRO A 479     124.070  40.040  28.680  1.00  0.00           H
ATOM   2861  HB2 PRO A 479     122.450  39.310  28.630  1.00  0.00           H
ATOM   2862  CA  PRO A 479     123.390  39.010  30.480  1.00  0.00           C
ATOM   2863  HA  PRO A 479     122.970  38.030  30.290  1.00  0.00           H
ATOM   2864  C   PRO A 479     124.850  38.660  30.690  1.00  0.00           C
ATOM   2865  O   PRO A 479     125.250  37.580  30.250  1.00  0.00           O
ATOM   2866  N   TYR A 480     125.600  39.570  31.310  1.00  0.00           N
ATOM   2867  H   TYR A 480     125.170  40.430  31.620  1.00  0.00           H
ATOM   2868  CA  TYR A 480     127.110  39.390  31.410  1.00  0.00           C
ATOM   2869  HA  TYR A 480     127.550  39.410  30.410  1.00  0.00           H
ATOM   2870  CB  TYR A 480     127.630  40.570  32.250  1.00  0.00           C
ATOM   2871  HB1 TYR A 480     128.720  40.620  32.300  1.00  0.00           H
ATOM   2872  HB2 TYR A 480     127.340  40.320  33.270  1.00  0.00           H
ATOM   2873  CG  TYR A 480     127.000  41.930  31.910  1.00  0.00           C
ATOM   2874  CD1 TYR A 480     126.210  42.660  32.910  1.00  0.00           C
ATOM   2875  HD1 TYR A 480     126.030  42.320  33.920  1.00  0.00           H
ATOM   2876  CE1 TYR A 480     125.450  43.720  32.500  1.00  0.00           C
ATOM   2877  HE1 TYR A 480     124.880  44.230  33.260  1.00  0.00           H
ATOM   2878  CZ  TYR A 480     125.570  44.260  31.260  1.00  0.00           C
ATOM   2879  OH  TYR A 480     124.910  45.430  31.030  1.00  0.00           O
ATOM   2880  HH  TYR A 480     125.110  45.910  30.220  1.00  0.00           H
ATOM   2881  CE2 TYR A 480     126.490  43.690  30.380  1.00  0.00           C
ATOM   2882  HE2 TYR A 480     126.740  44.240  29.490  1.00  0.00           H
ATOM   2883  CD2 TYR A 480     127.130  42.500  30.670  1.00  0.00           C
ATOM   2884  HD2 TYR A 480     127.890  42.150  29.980  1.00  0.00           H
ATOM   2885  C   TYR A 480     127.570  38.030  32.090  1.00  0.00           C
ATOM   2886  O   TYR A 480     128.710  37.560  31.940  1.00  0.00           O
ATOM   2887  N   TRP A 481     126.620  37.420  32.810  1.00  0.00           N
ATOM   2888  H   TRP A 481     125.710  37.850  32.830  1.00  0.00           H
ATOM   2889  CA  TRP A 481     126.850  36.150  33.540  1.00  0.00           C
ATOM   2890  HA  TRP A 481     127.830  35.720  33.350  1.00  0.00           H
ATOM   2891  CB  TRP A 481     126.670  36.390  35.040  1.00  0.00           C
ATOM   2892  HB1 TRP A 481     126.650  35.410  35.520  1.00  0.00           H
ATOM   2893  HB2 TRP A 481     125.710  36.840  35.280  1.00  0.00           H
ATOM   2894  CG  TRP A 481     127.700  37.310  35.620  1.00  0.00           C
ATOM   2895  CD1 TRP A 481     129.010  37.020  35.740  1.00  0.00           C
ATOM   2896  HD1 TRP A 481     129.470  36.100  35.410  1.00  0.00           H
ATOM   2897  NE1 TRP A 481     129.660  38.170  36.120  1.00  0.00           N
ATOM   2898  HE1 TRP A 481     130.660  38.110  36.240  1.00  0.00           H
ATOM   2899  CE2 TRP A 481     128.830  39.170  36.370  1.00  0.00           C
ATOM   2900  CZ2 TRP A 481     129.000  40.510  36.850  1.00  0.00           C
ATOM   2901  HZ2 TRP A 481     129.970  40.850  37.180  1.00  0.00           H
ATOM   2902  CH2 TRP A 481     127.870  41.350  36.970  1.00  0.00           C
ATOM   2903  HH2 TRP A 481     127.950  42.340  37.390  1.00  0.00           H
ATOM   2904  CZ3 TRP A 481     126.550  40.790  36.790  1.00  0.00           C
ATOM   2905  HZ3 TRP A 481     125.650  41.340  37.030  1.00  0.00           H
ATOM   2906  CE3 TRP A 481     126.410  39.440  36.300  1.00  0.00           C
ATOM   2907  HE3 TRP A 481     125.410  39.080  36.140  1.00  0.00           H
ATOM   2908  CD2 TRP A 481     127.530  38.650  36.020  1.00  0.00           C
ATOM   2909  C   TRP A 481     125.970  34.970  33.170  1.00  0.00           C
ATOM   2910  O   TRP A 481     126.410  33.820  33.310  1.00  0.00           O
ATOM   2911  N   MET A 482     124.720  35.180  32.700  1.00  0.00           N
ATOM   2912  H   MET A 482     124.450  36.140  32.530  1.00  0.00           H
ATOM   2913  CA  MET A 482     123.790  34.130  32.110  1.00  0.00           C
ATOM   2914  HA  MET A 482     123.500  33.410  32.870  1.00  0.00           H
ATOM   2915  CB  MET A 482     122.700  34.810  31.380  1.00  0.00           C
ATOM   2916  HB1 MET A 482     122.260  34.180  30.610  1.00  0.00           H
ATOM   2917  HB2 MET A 482     123.110  35.660  30.830  1.00  0.00           H
ATOM   2918  CG  MET A 482     121.560  35.230  32.310  1.00  0.00           C
ATOM   2919  HG1 MET A 482     122.020  35.430  33.270  1.00  0.00           H
ATOM   2920  HG2 MET A 482     120.790  34.480  32.460  1.00  0.00           H
ATOM   2921  SD  MET A 482     120.560  36.660  31.910  1.00  0.00           S
ATOM   2922  CE  MET A 482     119.500  35.950  30.570  1.00  0.00           C
ATOM   2923  HE1 MET A 482     120.010  35.590  29.690  1.00  0.00           H
ATOM   2924  HE2 MET A 482     118.960  35.090  30.950  1.00  0.00           H
ATOM   2925  HE3 MET A 482     118.730  36.700  30.350  1.00  0.00           H
ATOM   2926  C   MET A 482     124.530  33.270  31.080  1.00  0.00           C
ATOM   2927  O   MET A 482     125.240  33.740  30.190  1.00  0.00           O
ATOM   2928  N   ALA A 483     124.180  31.960  31.130  1.00  0.00           N
ATOM   2929  H   ALA A 483     123.740  31.560  31.950  1.00  0.00           H
ATOM   2930  CA  ALA A 483     124.510  30.980  30.130  1.00  0.00           C
ATOM   2931  HA  ALA A 483     125.600  31.000  30.020  1.00  0.00           H
ATOM   2932  CB  ALA A 483     124.160  29.660  30.810  1.00  0.00           C
ATOM   2933  HB1 ALA A 483     124.690  29.670  31.760  1.00  0.00           H
ATOM   2934  HB2 ALA A 483     123.070  29.590  30.870  1.00  0.00           H
ATOM   2935  HB3 ALA A 483     124.530  28.840  30.210  1.00  0.00           H
ATOM   2936  C   ALA A 483     123.810  31.130  28.730  1.00  0.00           C
ATOM   2937  O   ALA A 483     122.700  31.670  28.780  1.00  0.00           O
ATOM   2938  N   PRO A 484     124.450  30.660  27.690  1.00  0.00           N
ATOM   2939  CD  PRO A 484     125.710  29.850  27.690  1.00  0.00           C
ATOM   2940  HD1 PRO A 484     125.550  28.950  28.280  1.00  0.00           H
ATOM   2941  HD2 PRO A 484     126.470  30.510  28.110  1.00  0.00           H
ATOM   2942  CG  PRO A 484     126.020  29.510  26.210  1.00  0.00           C
ATOM   2943  HG1 PRO A 484     126.350  28.470  26.280  1.00  0.00           H
ATOM   2944  HG2 PRO A 484     126.750  30.190  25.770  1.00  0.00           H
ATOM   2945  CB  PRO A 484     124.730  29.620  25.520  1.00  0.00           C
ATOM   2946  HB1 PRO A 484     124.270  28.630  25.440  1.00  0.00           H
ATOM   2947  HB2 PRO A 484     124.900  30.060  24.530  1.00  0.00           H
ATOM   2948  CA  PRO A 484     123.860  30.540  26.340  1.00  0.00           C
ATOM   2949  HA  PRO A 484     123.950  31.580  26.030  1.00  0.00           H
ATOM   2950  C   PRO A 484     122.400  30.150  26.300  1.00  0.00           C
ATOM   2951  O   PRO A 484     121.660  30.850  25.580  1.00  0.00           O
ATOM   2952  N   GLU A 485     122.050  29.190  27.050  1.00  0.00           N
ATOM   2953  H   GLU A 485     122.770  28.790  27.630  1.00  0.00           H
ATOM   2954  CA  GLU A 485     120.730  28.640  27.190  1.00  0.00           C
ATOM   2955  HA  GLU A 485     120.280  28.410  26.220  1.00  0.00           H
ATOM   2956  CB  GLU A 485     120.660  27.350  27.980  1.00  0.00           C
ATOM   2957  HB1 GLU A 485     121.130  26.520  27.440  1.00  0.00           H
ATOM   2958  HB2 GLU A 485     119.590  27.140  28.050  1.00  0.00           H
ATOM   2959  CG  GLU A 485     121.390  27.300  29.380  1.00  0.00           C
ATOM   2960  HG1 GLU A 485     120.800  26.770  30.130  1.00  0.00           H
ATOM   2961  HG2 GLU A 485     121.350  28.290  29.830  1.00  0.00           H
ATOM   2962  CD  GLU A 485     122.810  26.750  29.230  1.00  0.00           C
ATOM   2963  OE1 GLU A 485     123.620  27.250  28.390  1.00  0.00           O
ATOM   2964  OE2 GLU A 485     123.080  25.760  29.930  1.00  0.00           O
ATOM   2965  C   GLU A 485     119.710  29.720  27.710  1.00  0.00           C
ATOM   2966  O   GLU A 485     118.720  30.020  26.980  1.00  0.00           O
ATOM   2967  N   LEU A 486     119.930  30.330  28.880  1.00  0.00           N
ATOM   2968  H   LEU A 486     120.700  29.900  29.360  1.00  0.00           H
ATOM   2969  CA  LEU A 486     119.130  31.430  29.450  1.00  0.00           C
ATOM   2970  HA  LEU A 486     118.070  31.170  29.570  1.00  0.00           H
ATOM   2971  CB  LEU A 486     119.850  31.780  30.770  1.00  0.00           C
ATOM   2972  HB1 LEU A 486     119.510  32.810  30.910  1.00  0.00           H
ATOM   2973  HB2 LEU A 486     120.900  32.000  30.550  1.00  0.00           H
ATOM   2974  CG  LEU A 486     119.810  30.990  32.030  1.00  0.00           C
ATOM   2975  HG  LEU A 486     119.790  29.920  31.860  1.00  0.00           H
ATOM   2976  CD1 LEU A 486     121.020  31.280  32.970  1.00  0.00           C
ATOM   2977 1HD1 LEU A 486     121.060  30.470  33.710  1.00  0.00           H
ATOM   2978 2HD1 LEU A 486     121.920  31.070  32.400  1.00  0.00           H
ATOM   2979 3HD1 LEU A 486     121.130  32.290  33.370  1.00  0.00           H
ATOM   2980  CD2 LEU A 486     118.580  31.350  32.810  1.00  0.00           C
ATOM   2981 1HD2 LEU A 486     118.670  30.800  33.750  1.00  0.00           H
ATOM   2982 2HD2 LEU A 486     118.420  32.410  33.000  1.00  0.00           H
ATOM   2983 3HD2 LEU A 486     117.720  30.960  32.270  1.00  0.00           H
ATOM   2984  C   LEU A 486     119.140  32.660  28.500  1.00  0.00           C
ATOM   2985  O   LEU A 486     118.190  33.380  28.450  1.00  0.00           O
ATOM   2986  N   ILE A 487     120.240  32.900  27.710  1.00  0.00           N
ATOM   2987  H   ILE A 487     121.010  32.300  27.940  1.00  0.00           H
ATOM   2988  CA  ILE A 487     120.360  34.060  26.820  1.00  0.00           C
ATOM   2989  HA  ILE A 487     120.060  34.930  27.400  1.00  0.00           H
ATOM   2990  CB  ILE A 487     121.810  34.170  26.310  1.00  0.00           C
ATOM   2991  HB  ILE A 487     122.200  33.190  26.040  1.00  0.00           H
ATOM   2992  CG2 ILE A 487     121.890  35.030  25.090  1.00  0.00           C
ATOM   2993 1HG2 ILE A 487     121.420  36.000  25.250  1.00  0.00           H
ATOM   2994 2HG2 ILE A 487     122.960  35.170  24.920  1.00  0.00           H
ATOM   2995 3HG2 ILE A 487     121.460  34.560  24.200  1.00  0.00           H
ATOM   2996  CG1 ILE A 487     122.870  34.600  27.330  1.00  0.00           C
ATOM   2997 1HG1 ILE A 487     123.870  34.320  26.990  1.00  0.00           H
ATOM   2998 2HG1 ILE A 487     122.700  33.900  28.150  1.00  0.00           H
ATOM   2999  CD  ILE A 487     122.690  35.990  27.890  1.00  0.00           C
ATOM   3000  HD1 ILE A 487     122.830  36.810  27.180  1.00  0.00           H
ATOM   3001  HD2 ILE A 487     121.740  36.150  28.410  1.00  0.00           H
ATOM   3002  HD3 ILE A 487     123.550  36.020  28.560  1.00  0.00           H
ATOM   3003  C   ILE A 487     119.370  33.850  25.670  1.00  0.00           C
ATOM   3004  O   ILE A 487     118.640  34.770  25.360  1.00  0.00           O
ATOM   3005  N   SER A 488     119.180  32.640  25.190  1.00  0.00           N
ATOM   3006  H   SER A 488     119.790  31.930  25.550  1.00  0.00           H
ATOM   3007  CA  SER A 488     118.140  32.310  24.200  1.00  0.00           C
ATOM   3008  HA  SER A 488     117.700  33.220  23.800  1.00  0.00           H
ATOM   3009  CB  SER A 488     118.770  31.370  23.080  1.00  0.00           C
ATOM   3010  HB1 SER A 488     117.900  31.020  22.520  1.00  0.00           H
ATOM   3011  HB2 SER A 488     119.360  30.560  23.500  1.00  0.00           H
ATOM   3012  OG  SER A 488     119.620  32.100  22.240  1.00  0.00           O
ATOM   3013  HG  SER A 488     119.960  31.480  21.600  1.00  0.00           H
ATOM   3014  C   SER A 488     116.880  31.690  24.880  1.00  0.00           C
ATOM   3015  O   SER A 488     116.090  31.120  24.180  1.00  0.00           O
ATOM   3016  N   ARG A 489     116.510  32.120  26.110  1.00  0.00           N
ATOM   3017  H   ARG A 489     117.170  32.630  26.670  1.00  0.00           H
ATOM   3018  CA  ARG A 489     115.170  31.890  26.760  1.00  0.00           C
ATOM   3019  HA  ARG A 489     115.350  32.350  27.730  1.00  0.00           H
ATOM   3020  CB  ARG A 489     113.990  32.700  26.060  1.00  0.00           C
ATOM   3021  HB1 ARG A 489     113.110  32.550  26.690  1.00  0.00           H
ATOM   3022  HB2 ARG A 489     113.790  32.330  25.060  1.00  0.00           H
ATOM   3023  CG  ARG A 489     114.220  34.290  26.170  1.00  0.00           C
ATOM   3024  HG1 ARG A 489     115.150  34.570  25.670  1.00  0.00           H
ATOM   3025  HG2 ARG A 489     114.120  34.590  27.210  1.00  0.00           H
ATOM   3026  CD  ARG A 489     113.160  35.030  25.350  1.00  0.00           C
ATOM   3027  HD1 ARG A 489     112.140  34.660  25.240  1.00  0.00           H
ATOM   3028  HD2 ARG A 489     113.490  35.020  24.310  1.00  0.00           H
ATOM   3029  NE  ARG A 489     113.080  36.430  25.870  1.00  0.00           N
ATOM   3030  HE  ARG A 489     113.240  36.520  26.870  1.00  0.00           H
ATOM   3031  CZ  ARG A 489     112.720  37.540  25.290  1.00  0.00           C
ATOM   3032  NH1 ARG A 489     112.610  38.690  25.970  1.00  0.00           N
ATOM   3033 1HH1 ARG A 489     113.140  38.770  26.820  1.00  0.00           H
ATOM   3034 2HH1 ARG A 489     112.550  39.550  25.440  1.00  0.00           H
ATOM   3035  NH2 ARG A 489     112.370  37.640  24.030  1.00  0.00           N
ATOM   3036 1HH2 ARG A 489     112.760  36.970  23.380  1.00  0.00           H
ATOM   3037 2HH2 ARG A 489     112.120  38.530  23.640  1.00  0.00           H
ATOM   3038  C   ARG A 489     114.880  30.450  27.200  1.00  0.00           C
ATOM   3039  O   ARG A 489     113.840  30.300  27.790  1.00  0.00           O
ATOM   3040  N   LEU A 490     115.770  29.480  26.790  1.00  0.00           N
ATOM   3041  H   LEU A 490     116.600  29.820  26.330  1.00  0.00           H
ATOM   3042  CA  LEU A 490     115.510  28.070  26.850  1.00  0.00           C
ATOM   3043  HA  LEU A 490     114.530  27.770  26.460  1.00  0.00           H
ATOM   3044  CB  LEU A 490     116.590  27.240  26.110  1.00  0.00           C
ATOM   3045  HB1 LEU A 490     116.720  26.220  26.480  1.00  0.00           H
ATOM   3046  HB2 LEU A 490     117.590  27.630  26.290  1.00  0.00           H
ATOM   3047  CG  LEU A 490     116.370  27.070  24.610  1.00  0.00           C
ATOM   3048  HG  LEU A 490     116.230  28.090  24.250  1.00  0.00           H
ATOM   3049  CD1 LEU A 490     117.560  26.390  23.950  1.00  0.00           C
ATOM   3050 1HD1 LEU A 490     117.650  25.330  24.200  1.00  0.00           H
ATOM   3051 2HD1 LEU A 490     117.470  26.490  22.860  1.00  0.00           H
ATOM   3052 3HD1 LEU A 490     118.440  26.840  24.400  1.00  0.00           H
ATOM   3053  CD2 LEU A 490     115.040  26.280  24.300  1.00  0.00           C
ATOM   3054 1HD2 LEU A 490     114.980  25.350  24.870  1.00  0.00           H
ATOM   3055 2HD2 LEU A 490     114.180  26.870  24.620  1.00  0.00           H
ATOM   3056 3HD2 LEU A 490     114.990  26.100  23.220  1.00  0.00           H
ATOM   3057  C   LEU A 490     115.450  27.660  28.350  1.00  0.00           C
ATOM   3058  O   LEU A 490     116.030  28.330  29.180  1.00  0.00           O
ATOM   3059  N   PRO A 491     114.810  26.460  28.740  1.00  0.00           N
ATOM   3060  CD  PRO A 491     113.830  25.690  28.000  1.00  0.00           C
ATOM   3061  HD1 PRO A 491     114.380  25.040  27.320  1.00  0.00           H
ATOM   3062  HD2 PRO A 491     113.280  26.440  27.430  1.00  0.00           H
ATOM   3063  CG  PRO A 491     112.950  24.880  29.000  1.00  0.00           C
ATOM   3064  HG1 PRO A 491     112.660  23.930  28.550  1.00  0.00           H
ATOM   3065  HG2 PRO A 491     112.160  25.460  29.450  1.00  0.00           H
ATOM   3066  CB  PRO A 491     113.970  24.630  30.090  1.00  0.00           C
ATOM   3067  HB1 PRO A 491     114.430  23.700  29.770  1.00  0.00           H
ATOM   3068  HB2 PRO A 491     113.500  24.550  31.080  1.00  0.00           H
ATOM   3069  CA  PRO A 491     114.960  25.840  30.090  1.00  0.00           C
ATOM   3070  HA  PRO A 491     114.630  26.580  30.820  1.00  0.00           H
ATOM   3071  C   PRO A 491     116.350  25.290  30.400  1.00  0.00           C
ATOM   3072  O   PRO A 491     117.080  24.760  29.550  1.00  0.00           O
ATOM   3073  N   TYR A 492     116.730  25.350  31.670  1.00  0.00           N
ATOM   3074  H   TYR A 492     116.040  25.710  32.320  1.00  0.00           H
ATOM   3075  CA  TYR A 492     118.050  25.070  32.150  1.00  0.00           C
ATOM   3076  HA  TYR A 492     118.530  24.450  31.390  1.00  0.00           H
ATOM   3077  CB  TYR A 492     118.860  26.420  32.200  1.00  0.00           C
ATOM   3078  HB1 TYR A 492     118.800  26.860  31.200  1.00  0.00           H
ATOM   3079  HB2 TYR A 492     119.900  26.190  32.450  1.00  0.00           H
ATOM   3080  CG  TYR A 492     118.340  27.390  33.270  1.00  0.00           C
ATOM   3081  CD1 TYR A 492     118.890  27.410  34.590  1.00  0.00           C
ATOM   3082  HD1 TYR A 492     119.800  26.890  34.840  1.00  0.00           H
ATOM   3083  CE1 TYR A 492     118.220  28.100  35.590  1.00  0.00           C
ATOM   3084  HE1 TYR A 492     118.570  28.120  36.610  1.00  0.00           H
ATOM   3085  CZ  TYR A 492     117.000  28.780  35.210  1.00  0.00           C
ATOM   3086  OH  TYR A 492     116.380  29.500  36.190  1.00  0.00           O
ATOM   3087  HH  TYR A 492     115.570  29.990  36.000  1.00  0.00           H
ATOM   3088  CE2 TYR A 492     116.630  28.940  33.880  1.00  0.00           C
ATOM   3089  HE2 TYR A 492     115.800  29.590  33.680  1.00  0.00           H
ATOM   3090  CD2 TYR A 492     117.240  28.180  32.860  1.00  0.00           C
ATOM   3091  HD2 TYR A 492     116.930  28.170  31.830  1.00  0.00           H
ATOM   3092  C   TYR A 492     118.050  24.340  33.500  1.00  0.00           C
ATOM   3093  O   TYR A 492     117.050  24.290  34.210  1.00  0.00           O
ATOM   3094  N   GLY A 493     119.170  23.710  33.780  1.00  0.00           N
ATOM   3095  H   GLY A 493     119.980  23.930  33.220  1.00  0.00           H
ATOM   3096  CA  GLY A 493     119.460  23.090  35.070  1.00  0.00           C
ATOM   3097  HA1 GLY A 493     119.300  22.010  35.060  1.00  0.00           H
ATOM   3098  HA2 GLY A 493     118.620  23.330  35.720  1.00  0.00           H
ATOM   3099  C   GLY A 493     120.870  23.440  35.600  1.00  0.00           C
ATOM   3100  O   GLY A 493     121.330  24.560  35.280  1.00  0.00           O
ATOM   3101  N   PRO A 494     121.430  22.740  36.590  1.00  0.00           N
ATOM   3102  CD  PRO A 494     120.840  21.540  37.180  1.00  0.00           C
ATOM   3103  HD1 PRO A 494     121.000  20.630  36.610  1.00  0.00           H
ATOM   3104  HD2 PRO A 494     119.790  21.660  37.460  1.00  0.00           H
ATOM   3105  CG  PRO A 494     121.640  21.280  38.460  1.00  0.00           C
ATOM   3106  HG1 PRO A 494     121.830  20.200  38.430  1.00  0.00           H
ATOM   3107  HG2 PRO A 494     121.160  21.590  39.390  1.00  0.00           H
ATOM   3108  CB  PRO A 494     122.940  22.020  38.310  1.00  0.00           C
ATOM   3109  HB1 PRO A 494     123.730  21.370  37.930  1.00  0.00           H
ATOM   3110  HB2 PRO A 494     123.370  22.360  39.250  1.00  0.00           H
ATOM   3111  CA  PRO A 494     122.620  23.160  37.310  1.00  0.00           C
ATOM   3112  HA  PRO A 494     122.430  24.110  37.820  1.00  0.00           H
ATOM   3113  C   PRO A 494     123.840  23.460  36.400  1.00  0.00           C
ATOM   3114  O   PRO A 494     124.840  23.940  36.910  1.00  0.00           O
ATOM   3115  N   GLU A 495     123.830  23.140  35.140  1.00  0.00           N
ATOM   3116  H   GLU A 495     123.070  22.630  34.730  1.00  0.00           H
ATOM   3117  CA  GLU A 495     124.860  23.470  34.150  1.00  0.00           C
ATOM   3118  HA  GLU A 495     125.850  23.060  34.360  1.00  0.00           H
ATOM   3119  CB  GLU A 495     124.420  23.050  32.780  1.00  0.00           C
ATOM   3120  HB1 GLU A 495     125.210  23.410  32.130  1.00  0.00           H
ATOM   3121  HB2 GLU A 495     123.550  23.620  32.460  1.00  0.00           H
ATOM   3122  CG  GLU A 495     124.200  21.570  32.560  1.00  0.00           C
ATOM   3123  HG1 GLU A 495     124.700  20.960  33.310  1.00  0.00           H
ATOM   3124  HG2 GLU A 495     124.760  21.290  31.670  1.00  0.00           H
ATOM   3125  CD  GLU A 495     122.660  21.330  32.540  1.00  0.00           C
ATOM   3126  OE1 GLU A 495     122.030  21.710  31.550  1.00  0.00           O
ATOM   3127  OE2 GLU A 495     122.160  20.580  33.440  1.00  0.00           O
ATOM   3128  C   GLU A 495     125.150  24.960  34.070  1.00  0.00           C
ATOM   3129  O   GLU A 495     126.200  25.300  33.600  1.00  0.00           O
ATOM   3130  N   VAL A 496     124.240  25.870  34.500  1.00  0.00           N
ATOM   3131  H   VAL A 496     123.550  25.530  35.170  1.00  0.00           H
ATOM   3132  CA  VAL A 496     124.470  27.320  34.290  1.00  0.00           C
ATOM   3133  HA  VAL A 496     124.880  27.600  33.320  1.00  0.00           H
ATOM   3134  CB  VAL A 496     123.200  28.100  34.160  1.00  0.00           C
ATOM   3135  HB  VAL A 496     123.490  29.130  33.990  1.00  0.00           H
ATOM   3136  CG1 VAL A 496     122.300  27.520  32.990  1.00  0.00           C
ATOM   3137 1HG1 VAL A 496     122.900  27.470  32.080  1.00  0.00           H
ATOM   3138 2HG1 VAL A 496     121.880  26.550  33.250  1.00  0.00           H
ATOM   3139 3HG1 VAL A 496     121.560  28.290  32.780  1.00  0.00           H
ATOM   3140  CG2 VAL A 496     122.400  28.030  35.490  1.00  0.00           C
ATOM   3141 1HG2 VAL A 496     122.030  27.030  35.700  1.00  0.00           H
ATOM   3142 2HG2 VAL A 496     122.990  28.260  36.370  1.00  0.00           H
ATOM   3143 3HG2 VAL A 496     121.590  28.760  35.520  1.00  0.00           H
ATOM   3144  C   VAL A 496     125.430  27.790  35.360  1.00  0.00           C
ATOM   3145  O   VAL A 496     126.190  28.720  35.150  1.00  0.00           O
ATOM   3146  N   ASP A 497     125.510  27.150  36.590  1.00  0.00           N
ATOM   3147  H   ASP A 497     124.760  26.570  36.920  1.00  0.00           H
ATOM   3148  CA  ASP A 497     126.630  27.480  37.560  1.00  0.00           C
ATOM   3149  HA  ASP A 497     126.530  28.550  37.760  1.00  0.00           H
ATOM   3150  CB  ASP A 497     126.490  26.920  38.960  1.00  0.00           C
ATOM   3151  HB1 ASP A 497     127.190  27.460  39.600  1.00  0.00           H
ATOM   3152  HB2 ASP A 497     126.660  25.840  38.940  1.00  0.00           H
ATOM   3153  CG  ASP A 497     125.030  27.200  39.510  1.00  0.00           C
ATOM   3154  OD1 ASP A 497     124.520  28.320  39.390  1.00  0.00           O
ATOM   3155  OD2 ASP A 497     124.520  26.330  40.180  1.00  0.00           O
ATOM   3156  C   ASP A 497     128.030  27.330  36.950  1.00  0.00           C
ATOM   3157  O   ASP A 497     128.840  28.220  37.150  1.00  0.00           O
ATOM   3158  N   ILE A 498     128.270  26.340  36.140  1.00  0.00           N
ATOM   3159  H   ILE A 498     127.540  25.660  36.010  1.00  0.00           H
ATOM   3160  CA  ILE A 498     129.650  26.110  35.570  1.00  0.00           C
ATOM   3161  HA  ILE A 498     130.340  26.070  36.420  1.00  0.00           H
ATOM   3162  CB  ILE A 498     129.550  24.770  34.810  1.00  0.00           C
ATOM   3163  HB  ILE A 498     128.890  24.970  33.960  1.00  0.00           H
ATOM   3164  CG2 ILE A 498     130.870  24.510  34.110  1.00  0.00           C
ATOM   3165 1HG2 ILE A 498     131.710  24.590  34.810  1.00  0.00           H
ATOM   3166 2HG2 ILE A 498     131.000  23.530  33.650  1.00  0.00           H
ATOM   3167 3HG2 ILE A 498     131.040  25.240  33.320  1.00  0.00           H
ATOM   3168  CG1 ILE A 498     129.060  23.530  35.590  1.00  0.00           C
ATOM   3169 1HG1 ILE A 498     128.900  22.700  34.910  1.00  0.00           H
ATOM   3170 2HG1 ILE A 498     128.040  23.790  35.870  1.00  0.00           H
ATOM   3171  CD  ILE A 498     129.950  23.090  36.820  1.00  0.00           C
ATOM   3172  HD1 ILE A 498     129.950  23.820  37.630  1.00  0.00           H
ATOM   3173  HD2 ILE A 498     129.640  22.150  37.280  1.00  0.00           H
ATOM   3174  HD3 ILE A 498     130.980  23.100  36.460  1.00  0.00           H
ATOM   3175  C   ILE A 498     130.130  27.220  34.610  1.00  0.00           C
ATOM   3176  O   ILE A 498     131.330  27.610  34.560  1.00  0.00           O
ATOM   3177  N   TRP A 499     129.130  27.810  33.910  1.00  0.00           N
ATOM   3178  H   TRP A 499     128.240  27.360  34.100  1.00  0.00           H
ATOM   3179  CA  TRP A 499     129.230  28.990  33.010  1.00  0.00           C
ATOM   3180  HA  TRP A 499     130.020  28.670  32.340  1.00  0.00           H
ATOM   3181  CB  TRP A 499     127.980  29.100  32.060  1.00  0.00           C
ATOM   3182  HB1 TRP A 499     127.150  29.340  32.720  1.00  0.00           H
ATOM   3183  HB2 TRP A 499     127.790  28.090  31.680  1.00  0.00           H
ATOM   3184  CG  TRP A 499     128.120  30.120  30.940  1.00  0.00           C
ATOM   3185  CD1 TRP A 499     127.830  31.420  31.060  1.00  0.00           C
ATOM   3186  HD1 TRP A 499     127.460  31.820  32.000  1.00  0.00           H
ATOM   3187  NE1 TRP A 499     128.080  32.150  29.950  1.00  0.00           N
ATOM   3188  HE1 TRP A 499     127.900  33.150  29.920  1.00  0.00           H
ATOM   3189  CE2 TRP A 499     128.620  31.320  29.000  1.00  0.00           C
ATOM   3190  CZ2 TRP A 499     129.090  31.650  27.700  1.00  0.00           C
ATOM   3191  HZ2 TRP A 499     129.080  32.690  27.390  1.00  0.00           H
ATOM   3192  CH2 TRP A 499     129.610  30.580  26.970  1.00  0.00           C
ATOM   3193  HH2 TRP A 499     129.880  30.710  25.940  1.00  0.00           H
ATOM   3194  CZ3 TRP A 499     129.680  29.260  27.490  1.00  0.00           C
ATOM   3195  HZ3 TRP A 499     130.070  28.470  26.860  1.00  0.00           H
ATOM   3196  CE3 TRP A 499     129.180  29.000  28.770  1.00  0.00           C
ATOM   3197  HE3 TRP A 499     129.210  27.980  29.100  1.00  0.00           H
ATOM   3198  CD2 TRP A 499     128.640  30.030  29.540  1.00  0.00           C
ATOM   3199  C   TRP A 499     129.540  30.310  33.710  1.00  0.00           C
ATOM   3200  O   TRP A 499     130.480  31.060  33.360  1.00  0.00           O
ATOM   3201  N   SER A 500     128.890  30.530  34.860  1.00  0.00           N
ATOM   3202  H   SER A 500     128.190  29.850  35.110  1.00  0.00           H
ATOM   3203  CA  SER A 500     129.040  31.720  35.710  1.00  0.00           C
ATOM   3204  HA  SER A 500     128.810  32.610  35.120  1.00  0.00           H
ATOM   3205  CB  SER A 500     128.060  31.710  36.800  1.00  0.00           C
ATOM   3206  HB1 SER A 500     128.040  32.690  37.270  1.00  0.00           H
ATOM   3207  HB2 SER A 500     128.260  30.880  37.470  1.00  0.00           H
ATOM   3208  OG  SER A 500     126.840  31.680  36.280  1.00  0.00           O
ATOM   3209  HG  SER A 500     126.290  31.810  37.060  1.00  0.00           H
ATOM   3210  C   SER A 500     130.460  31.710  36.230  1.00  0.00           C
ATOM   3211  O   SER A 500     131.050  32.790  36.360  1.00  0.00           O
ATOM   3212  N   LEU A 501     131.030  30.550  36.630  1.00  0.00           N
ATOM   3213  H   LEU A 501     130.440  29.730  36.610  1.00  0.00           H
ATOM   3214  CA  LEU A 501     132.370  30.340  37.080  1.00  0.00           C
ATOM   3215  HA  LEU A 501     132.640  31.150  37.760  1.00  0.00           H
ATOM   3216  CB  LEU A 501     132.440  28.910  37.720  1.00  0.00           C
ATOM   3217  HB1 LEU A 501     132.390  28.270  36.840  1.00  0.00           H
ATOM   3218  HB2 LEU A 501     131.560  28.740  38.340  1.00  0.00           H
ATOM   3219  CG  LEU A 501     133.740  28.630  38.540  1.00  0.00           C
ATOM   3220  HG  LEU A 501     134.570  28.570  37.840  1.00  0.00           H
ATOM   3221  CD1 LEU A 501     134.010  29.700  39.540  1.00  0.00           C
ATOM   3222 1HD1 LEU A 501     133.100  30.050  40.030  1.00  0.00           H
ATOM   3223 2HD1 LEU A 501     134.630  29.290  40.340  1.00  0.00           H
ATOM   3224 3HD1 LEU A 501     134.540  30.510  39.040  1.00  0.00           H
ATOM   3225  CD2 LEU A 501     133.620  27.320  39.240  1.00  0.00           C
ATOM   3226 1HD2 LEU A 501     134.460  27.060  39.890  1.00  0.00           H
ATOM   3227 2HD2 LEU A 501     132.700  27.330  39.830  1.00  0.00           H
ATOM   3228 3HD2 LEU A 501     133.500  26.520  38.500  1.00  0.00           H
ATOM   3229  C   LEU A 501     133.350  30.520  35.900  1.00  0.00           C
ATOM   3230  O   LEU A 501     134.350  31.180  36.130  1.00  0.00           O
ATOM   3231  N   GLY A 502     133.100  30.020  34.740  1.00  0.00           N
ATOM   3232  H   GLY A 502     132.310  29.410  34.640  1.00  0.00           H
ATOM   3233  CA  GLY A 502     133.870  30.250  33.540  1.00  0.00           C
ATOM   3234  HA1 GLY A 502     133.380  29.880  32.640  1.00  0.00           H
ATOM   3235  HA2 GLY A 502     134.870  29.820  33.610  1.00  0.00           H
ATOM   3236  C   GLY A 502     134.010  31.690  33.240  1.00  0.00           C
ATOM   3237  O   GLY A 502     135.130  32.200  33.110  1.00  0.00           O
ATOM   3238  N   ILE A 503     132.950  32.500  33.390  1.00  0.00           N
ATOM   3239  H   ILE A 503     132.060  32.100  33.650  1.00  0.00           H
ATOM   3240  CA  ILE A 503     132.940  33.950  33.300  1.00  0.00           C
ATOM   3241  HA  ILE A 503     133.330  34.210  32.320  1.00  0.00           H
ATOM   3242  CB  ILE A 503     131.500  34.490  33.440  1.00  0.00           C
ATOM   3243  HB  ILE A 503     131.060  34.150  34.380  1.00  0.00           H
ATOM   3244  CG2 ILE A 503     131.480  36.030  33.460  1.00  0.00           C
ATOM   3245 1HG2 ILE A 503     131.850  36.280  34.460  1.00  0.00           H
ATOM   3246 2HG2 ILE A 503     132.160  36.400  32.690  1.00  0.00           H
ATOM   3247 3HG2 ILE A 503     130.470  36.390  33.300  1.00  0.00           H
ATOM   3248  CG1 ILE A 503     130.620  34.050  32.240  1.00  0.00           C
ATOM   3249 1HG1 ILE A 503     129.600  34.290  32.550  1.00  0.00           H
ATOM   3250 2HG1 ILE A 503     130.660  32.980  32.010  1.00  0.00           H
ATOM   3251  CD  ILE A 503     130.950  34.650  30.870  1.00  0.00           C
ATOM   3252  HD1 ILE A 503     132.010  34.520  30.620  1.00  0.00           H
ATOM   3253  HD2 ILE A 503     130.310  34.260  30.080  1.00  0.00           H
ATOM   3254  HD3 ILE A 503     130.810  35.730  30.930  1.00  0.00           H
ATOM   3255  C   ILE A 503     133.830  34.530  34.430  1.00  0.00           C
ATOM   3256  O   ILE A 503     134.660  35.380  34.260  1.00  0.00           O
ATOM   3257  N   MET A 504     133.840  33.990  35.620  1.00  0.00           N
ATOM   3258  H   MET A 504     133.320  33.120  35.690  1.00  0.00           H
ATOM   3259  CA  MET A 504     134.570  34.450  36.840  1.00  0.00           C
ATOM   3260  HA  MET A 504     134.580  35.540  36.930  1.00  0.00           H
ATOM   3261  CB  MET A 504     134.100  33.710  38.100  1.00  0.00           C
ATOM   3262  HB1 MET A 504     134.640  32.790  38.290  1.00  0.00           H
ATOM   3263  HB2 MET A 504     133.030  33.510  38.060  1.00  0.00           H
ATOM   3264  CG  MET A 504     134.250  34.600  39.320  1.00  0.00           C
ATOM   3265  HG1 MET A 504     133.880  35.610  39.220  1.00  0.00           H
ATOM   3266  HG2 MET A 504     135.320  34.610  39.530  1.00  0.00           H
ATOM   3267  SD  MET A 504     133.490  33.710  40.760  1.00  0.00           S
ATOM   3268  CE  MET A 504     134.950  32.630  41.170  1.00  0.00           C
ATOM   3269  HE1 MET A 504     134.700  32.000  42.030  1.00  0.00           H
ATOM   3270  HE2 MET A 504     135.320  31.940  40.420  1.00  0.00           H
ATOM   3271  HE3 MET A 504     135.680  33.330  41.570  1.00  0.00           H
ATOM   3272  C   MET A 504     136.080  34.180  36.680  1.00  0.00           C
ATOM   3273  O   MET A 504     136.850  34.900  37.280  1.00  0.00           O
ATOM   3274  N   VAL A 505     136.460  33.230  35.810  1.00  0.00           N
ATOM   3275  H   VAL A 505     135.740  32.690  35.350  1.00  0.00           H
ATOM   3276  CA  VAL A 505     137.910  33.020  35.700  1.00  0.00           C
ATOM   3277  HA  VAL A 505     138.380  33.210  36.670  1.00  0.00           H
ATOM   3278  CB  VAL A 505     138.160  31.560  35.220  1.00  0.00           C
ATOM   3279  HB  VAL A 505     137.630  31.320  34.300  1.00  0.00           H
ATOM   3280  CG1 VAL A 505     139.630  31.260  34.870  1.00  0.00           C
ATOM   3281 1HG1 VAL A 505     140.330  31.420  35.690  1.00  0.00           H
ATOM   3282 2HG1 VAL A 505     139.840  30.250  34.520  1.00  0.00           H
ATOM   3283 3HG1 VAL A 505     139.930  32.000  34.130  1.00  0.00           H
ATOM   3284  CG2 VAL A 505     137.870  30.630  36.420  1.00  0.00           C
ATOM   3285 1HG2 VAL A 505     137.920  29.590  36.090  1.00  0.00           H
ATOM   3286 2HG2 VAL A 505     138.630  30.730  37.200  1.00  0.00           H
ATOM   3287 3HG2 VAL A 505     136.890  30.880  36.820  1.00  0.00           H
ATOM   3288  C   VAL A 505     138.530  34.090  34.810  1.00  0.00           C
ATOM   3289  O   VAL A 505     139.730  34.420  35.050  1.00  0.00           O
ATOM   3290  N   ILE A 506     137.800  34.760  33.930  1.00  0.00           N
ATOM   3291  H   ILE A 506     136.820  34.510  33.970  1.00  0.00           H
ATOM   3292  CA  ILE A 506     138.260  35.940  33.210  1.00  0.00           C
ATOM   3293  HA  ILE A 506     139.290  35.800  32.900  1.00  0.00           H
ATOM   3294  CB  ILE A 506     137.370  36.100  31.940  1.00  0.00           C
ATOM   3295  HB  ILE A 506     136.370  36.300  32.310  1.00  0.00           H
ATOM   3296  CG2 ILE A 506     137.740  37.310  31.090  1.00  0.00           C
ATOM   3297 1HG2 ILE A 506     136.810  37.670  30.650  1.00  0.00           H
ATOM   3298 2HG2 ILE A 506     138.320  38.010  31.690  1.00  0.00           H
ATOM   3299 3HG2 ILE A 506     138.360  37.060  30.230  1.00  0.00           H
ATOM   3300  CG1 ILE A 506     137.300  34.820  31.160  1.00  0.00           C
ATOM   3301 1HG1 ILE A 506     136.960  34.040  31.840  1.00  0.00           H
ATOM   3302 2HG1 ILE A 506     138.280  34.550  30.770  1.00  0.00           H
ATOM   3303  CD  ILE A 506     136.280  34.950  30.060  1.00  0.00           C
ATOM   3304  HD1 ILE A 506     135.240  35.130  30.340  1.00  0.00           H
ATOM   3305  HD2 ILE A 506     136.670  35.720  29.390  1.00  0.00           H
ATOM   3306  HD3 ILE A 506     136.330  33.990  29.560  1.00  0.00           H
ATOM   3307  C   ILE A 506     138.240  37.160  34.170  1.00  0.00           C
ATOM   3308  O   ILE A 506     139.200  37.950  34.090  1.00  0.00           O
ATOM   3309  N   GLU A 507     137.280  37.230  35.120  1.00  0.00           N
ATOM   3310  H   GLU A 507     136.540  36.550  35.110  1.00  0.00           H
ATOM   3311  CA  GLU A 507     137.440  38.240  36.180  1.00  0.00           C
ATOM   3312  HA  GLU A 507     137.500  39.230  35.720  1.00  0.00           H
ATOM   3313  CB  GLU A 507     136.130  38.210  37.020  1.00  0.00           C
ATOM   3314  HB1 GLU A 507     136.060  37.270  37.570  1.00  0.00           H
ATOM   3315  HB2 GLU A 507     135.350  38.270  36.260  1.00  0.00           H
ATOM   3316  CG  GLU A 507     135.980  39.360  38.030  1.00  0.00           C
ATOM   3317  HG1 GLU A 507     136.210  40.320  37.550  1.00  0.00           H
ATOM   3318  HG2 GLU A 507     136.660  39.150  38.860  1.00  0.00           H
ATOM   3319  CD  GLU A 507     134.530  39.460  38.520  1.00  0.00           C
ATOM   3320  OE1 GLU A 507     133.990  38.560  39.190  1.00  0.00           O
ATOM   3321  OE2 GLU A 507     133.950  40.570  38.360  1.00  0.00           O
ATOM   3322  C   GLU A 507     138.610  38.060  37.130  1.00  0.00           C
ATOM   3323  O   GLU A 507     139.150  39.090  37.480  1.00  0.00           O
ATOM   3324  N   MET A 508     139.160  36.860  37.260  1.00  0.00           N
ATOM   3325  H   MET A 508     138.690  36.040  36.900  1.00  0.00           H
ATOM   3326  CA  MET A 508     140.400  36.480  37.930  1.00  0.00           C
ATOM   3327  HA  MET A 508     140.370  37.210  38.740  1.00  0.00           H
ATOM   3328  CB  MET A 508     140.280  35.150  38.640  1.00  0.00           C
ATOM   3329  HB1 MET A 508     141.240  34.920  39.100  1.00  0.00           H
ATOM   3330  HB2 MET A 508     139.960  34.380  37.930  1.00  0.00           H
ATOM   3331  CG  MET A 508     139.370  35.170  39.840  1.00  0.00           C
ATOM   3332  HG1 MET A 508     138.420  35.580  39.480  1.00  0.00           H
ATOM   3333  HG2 MET A 508     139.760  35.830  40.600  1.00  0.00           H
ATOM   3334  SD  MET A 508     138.940  33.700  40.730  1.00  0.00           S
ATOM   3335  CE  MET A 508     138.160  32.690  39.550  1.00  0.00           C
ATOM   3336  HE1 MET A 508     137.340  33.350  39.280  1.00  0.00           H
ATOM   3337  HE2 MET A 508     138.830  32.580  38.700  1.00  0.00           H
ATOM   3338  HE3 MET A 508     137.860  31.740  39.980  1.00  0.00           H
ATOM   3339  C   MET A 508     141.680  36.650  37.170  1.00  0.00           C
ATOM   3340  O   MET A 508     142.700  36.740  37.890  1.00  0.00           O
ATOM   3341  N   VAL A 509     141.620  36.900  35.840  1.00  0.00           N
ATOM   3342  H   VAL A 509     140.760  36.660  35.360  1.00  0.00           H
ATOM   3343  CA  VAL A 509     142.800  37.390  35.030  1.00  0.00           C
ATOM   3344  HA  VAL A 509     143.720  37.260  35.610  1.00  0.00           H
ATOM   3345  CB  VAL A 509     142.990  36.540  33.690  1.00  0.00           C
ATOM   3346  HB  VAL A 509     142.140  36.640  33.010  1.00  0.00           H
ATOM   3347  CG1 VAL A 509     144.170  36.920  32.830  1.00  0.00           C
ATOM   3348 1HG1 VAL A 509     144.980  36.980  33.550  1.00  0.00           H
ATOM   3349 2HG1 VAL A 509     144.450  36.170  32.090  1.00  0.00           H
ATOM   3350 3HG1 VAL A 509     143.920  37.840  32.290  1.00  0.00           H
ATOM   3351  CG2 VAL A 509     143.090  35.070  33.960  1.00  0.00           C
ATOM   3352 1HG2 VAL A 509     143.910  34.980  34.670  1.00  0.00           H
ATOM   3353 2HG2 VAL A 509     142.220  34.740  34.530  1.00  0.00           H
ATOM   3354 3HG2 VAL A 509     143.080  34.500  33.030  1.00  0.00           H
ATOM   3355  C   VAL A 509     142.710  38.830  34.610  1.00  0.00           C
ATOM   3356  O   VAL A 509     143.690  39.520  34.530  1.00  0.00           O
ATOM   3357  N   ASP A 510     141.540  39.400  34.240  1.00  0.00           N
ATOM   3358  H   ASP A 510     140.710  38.850  34.440  1.00  0.00           H
ATOM   3359  CA  ASP A 510     141.330  40.710  33.640  1.00  0.00           C
ATOM   3360  HA  ASP A 510     142.300  41.060  33.300  1.00  0.00           H
ATOM   3361  CB  ASP A 510     140.330  40.550  32.490  1.00  0.00           C
ATOM   3362  HB1 ASP A 510     139.340  40.660  32.930  1.00  0.00           H
ATOM   3363  HB2 ASP A 510     140.430  39.610  31.940  1.00  0.00           H
ATOM   3364  CG  ASP A 510     140.560  41.580  31.440  1.00  0.00           C
ATOM   3365  OD1 ASP A 510     139.540  42.070  30.880  1.00  0.00           O
ATOM   3366  OD2 ASP A 510     141.720  41.830  31.020  1.00  0.00           O
ATOM   3367  C   ASP A 510     140.780  41.920  34.540  1.00  0.00           C
ATOM   3368  O   ASP A 510     140.820  43.100  34.140  1.00  0.00           O
ATOM   3369  N   GLY A 511     140.210  41.620  35.710  1.00  0.00           N
ATOM   3370  H   GLY A 511     140.210  40.650  36.000  1.00  0.00           H
ATOM   3371  CA  GLY A 511     139.500  42.510  36.700  1.00  0.00           C
ATOM   3372  HA1 GLY A 511     139.920  43.500  36.560  1.00  0.00           H
ATOM   3373  HA2 GLY A 511     139.600  42.100  37.700  1.00  0.00           H
ATOM   3374  C   GLY A 511     137.980  42.690  36.370  1.00  0.00           C
ATOM   3375  O   GLY A 511     137.300  43.380  37.110  1.00  0.00           O
ATOM   3376  N   GLU A 512     137.430  42.110  35.240  1.00  0.00           N
ATOM   3377  H   GLU A 512     138.060  41.630  34.610  1.00  0.00           H
ATOM   3378  CA  GLU A 512     135.990  42.220  34.830  1.00  0.00           C
ATOM   3379  HA  GLU A 512     135.370  42.240  35.730  1.00  0.00           H
ATOM   3380  CB  GLU A 512     135.640  43.570  34.130  1.00  0.00           C
ATOM   3381  HB1 GLU A 512     135.860  44.400  34.800  1.00  0.00           H
ATOM   3382  HB2 GLU A 512     134.570  43.560  33.930  1.00  0.00           H
ATOM   3383  CG  GLU A 512     136.410  43.670  32.810  1.00  0.00           C
ATOM   3384  HG1 GLU A 512     136.150  42.920  32.070  1.00  0.00           H
ATOM   3385  HG2 GLU A 512     137.450  43.480  33.060  1.00  0.00           H
ATOM   3386  CD  GLU A 512     136.310  44.980  32.090  1.00  0.00           C
ATOM   3387  OE1 GLU A 512     136.030  44.970  30.860  1.00  0.00           O
ATOM   3388  OE2 GLU A 512     136.520  46.060  32.650  1.00  0.00           O
ATOM   3389  C   GLU A 512     135.590  41.000  33.930  1.00  0.00           C
ATOM   3390  O   GLU A 512     136.470  40.330  33.430  1.00  0.00           O
ATOM   3391  N   PRO A 513     134.290  40.710  33.790  1.00  0.00           N
ATOM   3392  CD  PRO A 513     133.140  41.170  34.580  1.00  0.00           C
ATOM   3393  HD1 PRO A 513     133.090  42.250  34.670  1.00  0.00           H
ATOM   3394  HD2 PRO A 513     133.340  40.660  35.520  1.00  0.00           H
ATOM   3395  CG  PRO A 513     131.860  40.640  33.940  1.00  0.00           C
ATOM   3396  HG1 PRO A 513     131.560  41.280  33.120  1.00  0.00           H
ATOM   3397  HG2 PRO A 513     131.020  40.410  34.610  1.00  0.00           H
ATOM   3398  CB  PRO A 513     132.390  39.370  33.340  1.00  0.00           C
ATOM   3399  HB1 PRO A 513     131.740  39.180  32.480  1.00  0.00           H
ATOM   3400  HB2 PRO A 513     132.360  38.550  34.060  1.00  0.00           H
ATOM   3401  CA  PRO A 513     133.760  39.740  32.830  1.00  0.00           C
ATOM   3402  HA  PRO A 513     134.380  38.840  32.870  1.00  0.00           H
ATOM   3403  C   PRO A 513     133.650  40.410  31.420  1.00  0.00           C
ATOM   3404  O   PRO A 513     133.530  41.620  31.350  1.00  0.00           O
ATOM   3405  N   PRO A 514     133.440  39.620  30.330  1.00  0.00           N
ATOM   3406  CD  PRO A 514     133.460  38.180  30.310  1.00  0.00           C
ATOM   3407  HD1 PRO A 514     132.490  37.700  30.490  1.00  0.00           H
ATOM   3408  HD2 PRO A 514     134.120  37.800  31.090  1.00  0.00           H
ATOM   3409  CG  PRO A 514     133.910  37.760  28.910  1.00  0.00           C
ATOM   3410  HG1 PRO A 514     133.450  36.820  28.600  1.00  0.00           H
ATOM   3411  HG2 PRO A 514     134.990  37.580  28.960  1.00  0.00           H
ATOM   3412  CB  PRO A 514     133.520  38.990  28.010  1.00  0.00           C
ATOM   3413  HB1 PRO A 514     132.550  38.750  27.570  1.00  0.00           H
ATOM   3414  HB2 PRO A 514     134.370  39.140  27.350  1.00  0.00           H
ATOM   3415  CA  PRO A 514     133.350  40.150  28.970  1.00  0.00           C
ATOM   3416  HA  PRO A 514     134.080  40.930  28.780  1.00  0.00           H
ATOM   3417  C   PRO A 514     132.060  40.890  28.740  1.00  0.00           C
ATOM   3418  O   PRO A 514     131.030  40.510  29.330  1.00  0.00           O
ATOM   3419  N   TYR A 515     132.010  41.880  27.840  1.00  0.00           N
ATOM   3420  H   TYR A 515     132.940  42.060  27.490  1.00  0.00           H
ATOM   3421  CA  TYR A 515     130.940  42.770  27.450  1.00  0.00           C
ATOM   3422  HA  TYR A 515     131.310  43.500  26.730  1.00  0.00           H
ATOM   3423  CB  TYR A 515     129.830  41.990  26.690  1.00  0.00           C
ATOM   3424  HB1 TYR A 515     129.060  42.630  26.260  1.00  0.00           H
ATOM   3425  HB2 TYR A 515     129.310  41.440  27.480  1.00  0.00           H
ATOM   3426  CG  TYR A 515     130.300  40.930  25.640  1.00  0.00           C
ATOM   3427  CD1 TYR A 515     130.880  41.300  24.440  1.00  0.00           C
ATOM   3428  HD1 TYR A 515     131.070  42.350  24.260  1.00  0.00           H
ATOM   3429  CE1 TYR A 515     131.220  40.360  23.460  1.00  0.00           C
ATOM   3430  HE1 TYR A 515     131.640  40.770  22.550  1.00  0.00           H
ATOM   3431  CZ  TYR A 515     130.990  38.980  23.630  1.00  0.00           C
ATOM   3432  OH  TYR A 515     131.470  38.070  22.720  1.00  0.00           O
ATOM   3433  HH  TYR A 515     131.630  37.190  23.060  1.00  0.00           H
ATOM   3434  CE2 TYR A 515     130.610  38.610  24.980  1.00  0.00           C
ATOM   3435  HE2 TYR A 515     130.650  37.560  25.250  1.00  0.00           H
ATOM   3436  CD2 TYR A 515     130.250  39.570  25.960  1.00  0.00           C
ATOM   3437  HD2 TYR A 515     130.020  39.190  26.950  1.00  0.00           H
ATOM   3438  C   TYR A 515     130.430  43.760  28.500  1.00  0.00           C
ATOM   3439  O   TYR A 515     129.440  44.460  28.240  1.00  0.00           O
ATOM   3440  N   PHE A 516     131.050  43.800  29.690  1.00  0.00           N
ATOM   3441  H   PHE A 516     131.770  43.090  29.780  1.00  0.00           H
ATOM   3442  CA  PHE A 516     130.490  44.370  30.920  1.00  0.00           C
ATOM   3443  HA  PHE A 516     129.540  43.850  31.080  1.00  0.00           H
ATOM   3444  CB  PHE A 516     131.550  44.180  32.000  1.00  0.00           C
ATOM   3445  HB1 PHE A 516     132.410  44.700  31.570  1.00  0.00           H
ATOM   3446  HB2 PHE A 516     131.760  43.110  32.000  1.00  0.00           H
ATOM   3447  CG  PHE A 516     131.180  44.650  33.390  1.00  0.00           C
ATOM   3448  CD1 PHE A 516     131.890  45.720  34.040  1.00  0.00           C
ATOM   3449  HD1 PHE A 516     132.710  46.230  33.570  1.00  0.00           H
ATOM   3450  CE1 PHE A 516     131.460  46.140  35.310  1.00  0.00           C
ATOM   3451  HE1 PHE A 516     131.790  47.040  35.810  1.00  0.00           H
ATOM   3452  CZ  PHE A 516     130.450  45.400  35.960  1.00  0.00           C
ATOM   3453  HZ  PHE A 516     130.080  45.670  36.930  1.00  0.00           H
ATOM   3454  CE2 PHE A 516     129.750  44.360  35.330  1.00  0.00           C
ATOM   3455  HE2 PHE A 516     129.070  43.730  35.880  1.00  0.00           H
ATOM   3456  CD2 PHE A 516     130.130  43.970  34.040  1.00  0.00           C
ATOM   3457  HD2 PHE A 516     129.710  43.080  33.610  1.00  0.00           H
ATOM   3458  C   PHE A 516     130.160  45.880  30.940  1.00  0.00           C
ATOM   3459  O   PHE A 516     129.180  46.270  31.530  1.00  0.00           O
ATOM   3460  N   ASN A 517     130.880  46.700  30.130  1.00  0.00           N
ATOM   3461  H   ASN A 517     131.680  46.300  29.670  1.00  0.00           H
ATOM   3462  CA  ASN A 517     130.610  48.160  29.880  1.00  0.00           C
ATOM   3463  HA  ASN A 517     130.420  48.540  30.880  1.00  0.00           H
ATOM   3464  CB  ASN A 517     131.940  48.750  29.410  1.00  0.00           C
ATOM   3465  HB1 ASN A 517     131.850  49.830  29.500  1.00  0.00           H
ATOM   3466  HB2 ASN A 517     132.120  48.570  28.350  1.00  0.00           H
ATOM   3467  CG  ASN A 517     133.110  48.390  30.290  1.00  0.00           C
ATOM   3468  OD1 ASN A 517     133.140  48.590  31.500  1.00  0.00           O
ATOM   3469  ND2 ASN A 517     134.030  47.620  29.700  1.00  0.00           N
ATOM   3470 1HD2 ASN A 517     133.960  47.280  28.750  1.00  0.00           H
ATOM   3471 2HD2 ASN A 517     134.710  47.190  30.310  1.00  0.00           H
ATOM   3472  C   ASN A 517     129.460  48.510  28.900  1.00  0.00           C
ATOM   3473  O   ASN A 517     129.220  49.710  28.670  1.00  0.00           O
ATOM   3474  N   GLU A 518     128.830  47.510  28.340  1.00  0.00           N
ATOM   3475  H   GLU A 518     129.200  46.580  28.460  1.00  0.00           H
ATOM   3476  CA  GLU A 518     127.680  47.740  27.420  1.00  0.00           C
ATOM   3477  HA  GLU A 518     127.750  48.770  27.060  1.00  0.00           H
ATOM   3478  CB  GLU A 518     127.730  46.700  26.310  1.00  0.00           C
ATOM   3479  HB1 GLU A 518     126.910  46.870  25.620  1.00  0.00           H
ATOM   3480  HB2 GLU A 518     127.550  45.730  26.770  1.00  0.00           H
ATOM   3481  CG  GLU A 518     129.030  46.710  25.480  1.00  0.00           C
ATOM   3482  HG1 GLU A 518     128.950  45.820  24.860  1.00  0.00           H
ATOM   3483  HG2 GLU A 518     129.910  46.620  26.120  1.00  0.00           H
ATOM   3484  CD  GLU A 518     129.220  47.990  24.650  1.00  0.00           C
ATOM   3485  OE1 GLU A 518     129.080  49.170  25.200  1.00  0.00           O
ATOM   3486  OE2 GLU A 518     129.560  47.920  23.450  1.00  0.00           O
ATOM   3487  C   GLU A 518     126.280  47.390  27.980  1.00  0.00           C
ATOM   3488  O   GLU A 518     126.100  46.650  28.910  1.00  0.00           O
ATOM   3489  N   PRO A 519     125.190  48.090  27.560  1.00  0.00           N
ATOM   3490  CD  PRO A 519     125.200  49.220  26.640  1.00  0.00           C
ATOM   3491  HD1 PRO A 519     125.390  49.060  25.580  1.00  0.00           H
ATOM   3492  HD2 PRO A 519     125.950  49.920  27.020  1.00  0.00           H
ATOM   3493  CG  PRO A 519     123.870  49.910  26.820  1.00  0.00           C
ATOM   3494  HG1 PRO A 519     123.420  50.040  25.830  1.00  0.00           H
ATOM   3495  HG2 PRO A 519     124.020  50.890  27.270  1.00  0.00           H
ATOM   3496  CB  PRO A 519     122.930  48.980  27.610  1.00  0.00           C
ATOM   3497  HB1 PRO A 519     122.210  48.660  26.860  1.00  0.00           H
ATOM   3498  HB2 PRO A 519     122.350  49.460  28.390  1.00  0.00           H
ATOM   3499  CA  PRO A 519     123.830  47.910  28.180  1.00  0.00           C
ATOM   3500  HA  PRO A 519     123.830  48.140  29.250  1.00  0.00           H
ATOM   3501  C   PRO A 519     123.240  46.470  28.060  1.00  0.00           C
ATOM   3502  O   PRO A 519     123.500  45.850  27.080  1.00  0.00           O
ATOM   3503  N   PRO A 520     122.440  45.920  28.980  1.00  0.00           N
ATOM   3504  CD  PRO A 520     121.900  46.690  30.080  1.00  0.00           C
ATOM   3505  HD1 PRO A 520     121.050  47.310  29.800  1.00  0.00           H
ATOM   3506  HD2 PRO A 520     122.690  47.190  30.650  1.00  0.00           H
ATOM   3507  CG  PRO A 520     121.260  45.620  31.060  1.00  0.00           C
ATOM   3508  HG1 PRO A 520     120.420  46.070  31.590  1.00  0.00           H
ATOM   3509  HG2 PRO A 520     121.970  45.280  31.820  1.00  0.00           H
ATOM   3510  CB  PRO A 520     120.930  44.500  30.070  1.00  0.00           C
ATOM   3511  HB1 PRO A 520     119.990  44.810  29.590  1.00  0.00           H
ATOM   3512  HB2 PRO A 520     120.780  43.500  30.470  1.00  0.00           H
ATOM   3513  CA  PRO A 520     121.990  44.550  28.980  1.00  0.00           C
ATOM   3514  HA  PRO A 520     122.880  43.980  29.220  1.00  0.00           H
ATOM   3515  C   PRO A 520     121.450  43.970  27.650  1.00  0.00           C
ATOM   3516  O   PRO A 520     121.990  42.960  27.280  1.00  0.00           O
ATOM   3517  N   LEU A 521     120.510  44.540  26.920  1.00  0.00           N
ATOM   3518  H   LEU A 521     120.200  45.440  27.250  1.00  0.00           H
ATOM   3519  CA  LEU A 521     120.020  44.170  25.580  1.00  0.00           C
ATOM   3520  HA  LEU A 521     119.620  43.160  25.700  1.00  0.00           H
ATOM   3521  CB  LEU A 521     118.830  45.140  25.140  1.00  0.00           C
ATOM   3522  HB1 LEU A 521     119.010  45.270  24.080  1.00  0.00           H
ATOM   3523  HB2 LEU A 521     118.970  46.100  25.630  1.00  0.00           H
ATOM   3524  CG  LEU A 521     117.360  44.510  25.290  1.00  0.00           C
ATOM   3525  HG  LEU A 521     117.130  44.260  26.330  1.00  0.00           H
ATOM   3526  CD1 LEU A 521     116.360  45.520  24.760  1.00  0.00           C
ATOM   3527 1HD1 LEU A 521     115.340  45.250  25.020  1.00  0.00           H
ATOM   3528 2HD1 LEU A 521     116.640  46.400  25.340  1.00  0.00           H
ATOM   3529 3HD1 LEU A 521     116.460  45.690  23.690  1.00  0.00           H
ATOM   3530  CD2 LEU A 521     117.340  43.260  24.520  1.00  0.00           C
ATOM   3531 1HD2 LEU A 521     117.910  42.490  25.050  1.00  0.00           H
ATOM   3532 2HD2 LEU A 521     116.310  42.940  24.350  1.00  0.00           H
ATOM   3533 3HD2 LEU A 521     117.730  43.410  23.520  1.00  0.00           H
ATOM   3534  C   LEU A 521     121.150  44.210  24.530  1.00  0.00           C
ATOM   3535  O   LEU A 521     121.220  43.290  23.720  1.00  0.00           O
ATOM   3536  N   LYS A 522     122.130  45.160  24.580  1.00  0.00           N
ATOM   3537  H   LYS A 522     122.060  45.890  25.280  1.00  0.00           H
ATOM   3538  CA  LYS A 522     123.300  45.260  23.660  1.00  0.00           C
ATOM   3539  HA  LYS A 522     123.050  45.180  22.600  1.00  0.00           H
ATOM   3540  CB  LYS A 522     124.060  46.550  23.890  1.00  0.00           C
ATOM   3541  HB1 LYS A 522     124.550  46.500  24.870  1.00  0.00           H
ATOM   3542  HB2 LYS A 522     123.430  47.440  23.800  1.00  0.00           H
ATOM   3543  CG  LYS A 522     125.090  46.660  22.750  1.00  0.00           C
ATOM   3544  HG1 LYS A 522     124.510  46.560  21.830  1.00  0.00           H
ATOM   3545  HG2 LYS A 522     125.850  45.900  22.930  1.00  0.00           H
ATOM   3546  CD  LYS A 522     125.630  48.070  22.770  1.00  0.00           C
ATOM   3547  HD1 LYS A 522     126.150  48.220  23.720  1.00  0.00           H
ATOM   3548  HD2 LYS A 522     124.870  48.840  22.680  1.00  0.00           H
ATOM   3549  CE  LYS A 522     126.560  48.280  21.600  1.00  0.00           C
ATOM   3550  HE1 LYS A 522     125.960  48.470  20.710  1.00  0.00           H
ATOM   3551  HE2 LYS A 522     127.020  47.320  21.400  1.00  0.00           H
ATOM   3552  NZ  LYS A 522     127.600  49.330  21.890  1.00  0.00           N
ATOM   3553  HZ1 LYS A 522     127.040  50.110  22.180  1.00  0.00           H
ATOM   3554  HZ2 LYS A 522     128.200  49.010  22.640  1.00  0.00           H
ATOM   3555  HZ3 LYS A 522     127.980  49.640  21.010  1.00  0.00           H
ATOM   3556  C   LYS A 522     124.210  44.080  23.990  1.00  0.00           C
ATOM   3557  O   LYS A 522     124.480  43.320  23.060  1.00  0.00           O
ATOM   3558  N   ALA A 523     124.690  43.900  25.260  1.00  0.00           N
ATOM   3559  H   ALA A 523     124.300  44.510  25.950  1.00  0.00           H
ATOM   3560  CA  ALA A 523     125.510  42.770  25.600  1.00  0.00           C
ATOM   3561  HA  ALA A 523     126.440  42.760  25.040  1.00  0.00           H
ATOM   3562  CB  ALA A 523     125.980  42.910  27.100  1.00  0.00           C
ATOM   3563  HB1 ALA A 523     125.200  42.620  27.800  1.00  0.00           H
ATOM   3564  HB2 ALA A 523     126.800  42.200  27.180  1.00  0.00           H
ATOM   3565  HB3 ALA A 523     126.270  43.930  27.330  1.00  0.00           H
ATOM   3566  C   ALA A 523     124.810  41.380  25.350  1.00  0.00           C
ATOM   3567  O   ALA A 523     125.470  40.440  24.900  1.00  0.00           O
ATOM   3568  N   MET A 524     123.530  41.270  25.610  1.00  0.00           N
ATOM   3569  H   MET A 524     122.980  42.050  25.950  1.00  0.00           H
ATOM   3570  CA  MET A 524     122.780  40.040  25.410  1.00  0.00           C
ATOM   3571  HA  MET A 524     123.310  39.210  25.860  1.00  0.00           H
ATOM   3572  CB  MET A 524     121.360  40.190  26.000  1.00  0.00           C
ATOM   3573  HB1 MET A 524     120.740  40.810  25.350  1.00  0.00           H
ATOM   3574  HB2 MET A 524     121.360  40.620  27.010  1.00  0.00           H
ATOM   3575  CG  MET A 524     120.670  38.840  26.130  1.00  0.00           C
ATOM   3576  HG1 MET A 524     121.260  38.110  26.690  1.00  0.00           H
ATOM   3577  HG2 MET A 524     120.590  38.420  25.120  1.00  0.00           H
ATOM   3578  SD  MET A 524     119.020  38.950  26.780  1.00  0.00           S
ATOM   3579  CE  MET A 524     119.320  39.060  28.540  1.00  0.00           C
ATOM   3580  HE1 MET A 524     118.480  39.490  29.090  1.00  0.00           H
ATOM   3581  HE2 MET A 524     119.600  38.150  29.070  1.00  0.00           H
ATOM   3582  HE3 MET A 524     120.100  39.820  28.640  1.00  0.00           H
ATOM   3583  C   MET A 524     122.750  39.670  23.880  1.00  0.00           C
ATOM   3584  O   MET A 524     122.960  38.450  23.600  1.00  0.00           O
ATOM   3585  N   LYS A 525     122.610  40.650  22.960  1.00  0.00           N
ATOM   3586  H   LYS A 525     122.390  41.600  23.250  1.00  0.00           H
ATOM   3587  CA  LYS A 525     122.660  40.530  21.520  1.00  0.00           C
ATOM   3588  HA  LYS A 525     121.950  39.760  21.230  1.00  0.00           H
ATOM   3589  CB  LYS A 525     122.120  41.840  20.810  1.00  0.00           C
ATOM   3590  HB1 LYS A 525     122.440  41.850  19.770  1.00  0.00           H
ATOM   3591  HB2 LYS A 525     122.590  42.690  21.300  1.00  0.00           H
ATOM   3592  CG  LYS A 525     120.590  41.940  20.790  1.00  0.00           C
ATOM   3593  HG1 LYS A 525     120.260  41.960  21.830  1.00  0.00           H
ATOM   3594  HG2 LYS A 525     120.170  41.070  20.280  1.00  0.00           H
ATOM   3595  CD  LYS A 525     120.100  43.190  20.010  1.00  0.00           C
ATOM   3596  HD1 LYS A 525     119.060  42.920  19.820  1.00  0.00           H
ATOM   3597  HD2 LYS A 525     120.690  43.200  19.090  1.00  0.00           H
ATOM   3598  CE  LYS A 525     120.240  44.380  20.950  1.00  0.00           C
ATOM   3599  HE1 LYS A 525     121.210  44.400  21.450  1.00  0.00           H
ATOM   3600  HE2 LYS A 525     119.580  44.230  21.800  1.00  0.00           H
ATOM   3601  NZ  LYS A 525     119.850  45.610  20.270  1.00  0.00           N
ATOM   3602  HZ1 LYS A 525     118.940  45.560  19.830  1.00  0.00           H
ATOM   3603  HZ2 LYS A 525     119.890  46.430  20.860  1.00  0.00           H
ATOM   3604  HZ3 LYS A 525     120.470  45.720  19.490  1.00  0.00           H
ATOM   3605  C   LYS A 525     124.040  40.110  21.080  1.00  0.00           C
ATOM   3606  O   LYS A 525     124.100  39.380  20.090  1.00  0.00           O
ATOM   3607  N   MET A 526     125.120  40.610  21.650  1.00  0.00           N
ATOM   3608  H   MET A 526     125.000  41.370  22.300  1.00  0.00           H
ATOM   3609  CA  MET A 526     126.530  40.170  21.430  1.00  0.00           C
ATOM   3610  HA  MET A 526     126.760  40.350  20.380  1.00  0.00           H
ATOM   3611  CB  MET A 526     127.510  40.990  22.220  1.00  0.00           C
ATOM   3612  HB1 MET A 526     128.540  40.670  22.090  1.00  0.00           H
ATOM   3613  HB2 MET A 526     127.290  41.050  23.290  1.00  0.00           H
ATOM   3614  CG  MET A 526     127.480  42.440  21.720  1.00  0.00           C
ATOM   3615  HG1 MET A 526     126.440  42.740  21.680  1.00  0.00           H
ATOM   3616  HG2 MET A 526     128.000  42.450  20.760  1.00  0.00           H
ATOM   3617  SD  MET A 526     128.350  43.510  22.850  1.00  0.00           S
ATOM   3618  CE  MET A 526     128.450  44.940  21.690  1.00  0.00           C
ATOM   3619  HE1 MET A 526     127.420  45.170  21.390  1.00  0.00           H
ATOM   3620  HE2 MET A 526     129.030  45.610  22.320  1.00  0.00           H
ATOM   3621  HE3 MET A 526     129.090  44.640  20.860  1.00  0.00           H
ATOM   3622  C   MET A 526     126.690  38.700  21.830  1.00  0.00           C
ATOM   3623  O   MET A 526     127.010  37.810  21.040  1.00  0.00           O
ATOM   3624  N   ILE A 527     126.450  38.320  23.080  1.00  0.00           N
ATOM   3625  H   ILE A 527     126.170  39.100  23.670  1.00  0.00           H
ATOM   3626  CA  ILE A 527     126.600  37.010  23.740  1.00  0.00           C
ATOM   3627  HA  ILE A 527     127.620  36.630  23.700  1.00  0.00           H
ATOM   3628  CB  ILE A 527     126.150  37.090  25.190  1.00  0.00           C
ATOM   3629  HB  ILE A 527     125.150  37.530  25.240  1.00  0.00           H
ATOM   3630  CG2 ILE A 527     126.070  35.770  25.920  1.00  0.00           C
ATOM   3631 1HG2 ILE A 527     127.070  35.330  25.940  1.00  0.00           H
ATOM   3632 2HG2 ILE A 527     125.800  35.960  26.960  1.00  0.00           H
ATOM   3633 3HG2 ILE A 527     125.280  35.200  25.440  1.00  0.00           H
ATOM   3634  CG1 ILE A 527     127.170  38.000  25.920  1.00  0.00           C
ATOM   3635 1HG1 ILE A 527     127.440  38.860  25.310  1.00  0.00           H
ATOM   3636 2HG1 ILE A 527     128.060  37.370  26.000  1.00  0.00           H
ATOM   3637  CD  ILE A 527     127.010  38.610  27.270  1.00  0.00           C
ATOM   3638  HD1 ILE A 527     125.980  38.890  27.470  1.00  0.00           H
ATOM   3639  HD2 ILE A 527     127.170  37.820  28.010  1.00  0.00           H
ATOM   3640  HD3 ILE A 527     127.540  39.550  27.370  1.00  0.00           H
ATOM   3641  C   ILE A 527     125.870  35.920  22.970  1.00  0.00           C
ATOM   3642  O   ILE A 527     126.300  34.710  22.790  1.00  0.00           O
ATOM   3643  N   ARG A 528     124.640  36.330  22.510  1.00  0.00           N
ATOM   3644  H   ARG A 528     124.350  37.290  22.630  1.00  0.00           H
ATOM   3645  CA  ARG A 528     123.880  35.510  21.610  1.00  0.00           C
ATOM   3646  HA  ARG A 528     123.910  34.530  22.070  1.00  0.00           H
ATOM   3647  CB  ARG A 528     122.390  35.850  21.610  1.00  0.00           C
ATOM   3648  HB1 ARG A 528     122.310  36.800  21.080  1.00  0.00           H
ATOM   3649  HB2 ARG A 528     122.140  36.040  22.660  1.00  0.00           H
ATOM   3650  CG  ARG A 528     121.530  34.700  21.180  1.00  0.00           C
ATOM   3651  HG1 ARG A 528     121.640  33.850  21.860  1.00  0.00           H
ATOM   3652  HG2 ARG A 528     121.830  34.420  20.180  1.00  0.00           H
ATOM   3653  CD  ARG A 528     120.040  35.080  21.040  1.00  0.00           C
ATOM   3654  HD1 ARG A 528     119.490  34.190  20.720  1.00  0.00           H
ATOM   3655  HD2 ARG A 528     120.000  35.760  20.190  1.00  0.00           H
ATOM   3656  NE  ARG A 528     119.430  35.600  22.270  1.00  0.00           N
ATOM   3657  HE  ARG A 528     119.100  34.850  22.860  1.00  0.00           H
ATOM   3658  CZ  ARG A 528     119.250  36.800  22.640  1.00  0.00           C
ATOM   3659  NH1 ARG A 528     119.600  37.920  22.000  1.00  0.00           N
ATOM   3660 1HH1 ARG A 528     120.040  37.810  21.100  1.00  0.00           H
ATOM   3661 2HH1 ARG A 528     119.400  38.800  22.470  1.00  0.00           H
ATOM   3662  NH2 ARG A 528     118.690  37.030  23.780  1.00  0.00           N
ATOM   3663 1HH2 ARG A 528     118.560  36.350  24.510  1.00  0.00           H
ATOM   3664 2HH2 ARG A 528     118.490  38.020  23.840  1.00  0.00           H
ATOM   3665  C   ARG A 528     124.390  35.370  20.160  1.00  0.00           C
ATOM   3666  O   ARG A 528     124.180  34.260  19.640  1.00  0.00           O
ATOM   3667  N   ASP A 529     124.960  36.410  19.530  1.00  0.00           N
ATOM   3668  H   ASP A 529     125.090  37.260  20.060  1.00  0.00           H
ATOM   3669  CA  ASP A 529     125.530  36.290  18.120  1.00  0.00           C
ATOM   3670  HA  ASP A 529     125.020  35.400  17.750  1.00  0.00           H
ATOM   3671  CB  ASP A 529     125.180  37.450  17.260  1.00  0.00           C
ATOM   3672  HB1 ASP A 529     125.590  37.320  16.260  1.00  0.00           H
ATOM   3673  HB2 ASP A 529     125.610  38.360  17.670  1.00  0.00           H
ATOM   3674  CG  ASP A 529     123.630  37.680  17.150  1.00  0.00           C
ATOM   3675  OD1 ASP A 529     122.870  36.670  17.300  1.00  0.00           O
ATOM   3676  OD2 ASP A 529     123.140  38.810  16.940  1.00  0.00           O
ATOM   3677  C   ASP A 529     126.970  35.910  17.940  1.00  0.00           C
ATOM   3678  O   ASP A 529     127.420  35.550  16.840  1.00  0.00           O
ATOM   3679  N   ASN A 530     127.780  36.030  19.000  1.00  0.00           N
ATOM   3680  H   ASN A 530     127.380  36.340  19.870  1.00  0.00           H
ATOM   3681  CA  ASN A 530     129.260  35.950  18.880  1.00  0.00           C
ATOM   3682  HA  ASN A 530     129.550  36.220  17.870  1.00  0.00           H
ATOM   3683  CB  ASN A 530     129.940  37.010  19.900  1.00  0.00           C
ATOM   3684  HB1 ASN A 530     131.010  36.850  20.040  1.00  0.00           H
ATOM   3685  HB2 ASN A 530     129.520  36.930  20.900  1.00  0.00           H
ATOM   3686  CG  ASN A 530     129.800  38.460  19.470  1.00  0.00           C
ATOM   3687  OD1 ASN A 530     129.320  38.850  18.430  1.00  0.00           O
ATOM   3688  ND2 ASN A 530     130.400  39.310  20.220  1.00  0.00           N
ATOM   3689 1HD2 ASN A 530     131.000  39.060  20.990  1.00  0.00           H
ATOM   3690 2HD2 ASN A 530     130.300  40.240  19.840  1.00  0.00           H
ATOM   3691  C   ASN A 530     129.750  34.550  19.370  1.00  0.00           C
ATOM   3692  O   ASN A 530     129.020  33.740  19.930  1.00  0.00           O
ATOM   3693  N   LEU A 531     131.010  34.270  19.060  1.00  0.00           N
ATOM   3694  H   LEU A 531     131.650  34.910  18.620  1.00  0.00           H
ATOM   3695  CA  LEU A 531     131.730  33.080  19.550  1.00  0.00           C
ATOM   3696  HA  LEU A 531     131.170  32.200  19.210  1.00  0.00           H
ATOM   3697  CB  LEU A 531     133.160  32.890  18.980  1.00  0.00           C
ATOM   3698  HB1 LEU A 531     133.750  32.110  19.470  1.00  0.00           H
ATOM   3699  HB2 LEU A 531     133.640  33.830  19.220  1.00  0.00           H
ATOM   3700  CG  LEU A 531     133.150  32.800  17.420  1.00  0.00           C
ATOM   3701  HG  LEU A 531     132.560  33.680  17.160  1.00  0.00           H
ATOM   3702  CD1 LEU A 531     134.530  32.700  16.730  1.00  0.00           C
ATOM   3703 1HD1 LEU A 531     134.310  32.650  15.660  1.00  0.00           H
ATOM   3704 2HD1 LEU A 531     135.140  33.590  16.910  1.00  0.00           H
ATOM   3705 3HD1 LEU A 531     135.100  31.830  17.040  1.00  0.00           H
ATOM   3706  CD2 LEU A 531     132.300  31.650  16.890  1.00  0.00           C
ATOM   3707 1HD2 LEU A 531     132.730  30.680  17.120  1.00  0.00           H
ATOM   3708 2HD2 LEU A 531     131.230  31.690  17.080  1.00  0.00           H
ATOM   3709 3HD2 LEU A 531     132.420  31.720  15.800  1.00  0.00           H
ATOM   3710  C   LEU A 531     131.770  32.980  21.120  1.00  0.00           C
ATOM   3711  O   LEU A 531     131.920  34.030  21.760  1.00  0.00           O
ATOM   3712  N   PRO A 532     131.880  31.830  21.720  1.00  0.00           N
ATOM   3713  CD  PRO A 532     131.220  30.680  21.180  1.00  0.00           C
ATOM   3714  HD1 PRO A 532     131.970  30.150  20.590  1.00  0.00           H
ATOM   3715  HD2 PRO A 532     130.380  30.970  20.540  1.00  0.00           H
ATOM   3716  CG  PRO A 532     130.830  29.850  22.380  1.00  0.00           C
ATOM   3717  HG1 PRO A 532     130.810  28.780  22.180  1.00  0.00           H
ATOM   3718  HG2 PRO A 532     129.800  30.080  22.650  1.00  0.00           H
ATOM   3719  CB  PRO A 532     131.850  30.170  23.460  1.00  0.00           C
ATOM   3720  HB1 PRO A 532     132.730  29.580  23.220  1.00  0.00           H
ATOM   3721  HB2 PRO A 532     131.480  30.030  24.480  1.00  0.00           H
ATOM   3722  CA  PRO A 532     132.110  31.680  23.140  1.00  0.00           C
ATOM   3723  HA  PRO A 532     131.350  32.240  23.690  1.00  0.00           H
ATOM   3724  C   PRO A 532     133.530  32.140  23.540  1.00  0.00           C
ATOM   3725  O   PRO A 532     134.440  32.130  22.700  1.00  0.00           O
ATOM   3726  N   PRO A 533     133.770  32.540  24.870  1.00  0.00           N
ATOM   3727  CD  PRO A 533     132.780  32.860  25.850  1.00  0.00           C
ATOM   3728  HD1 PRO A 533     132.580  31.970  26.440  1.00  0.00           H
ATOM   3729  HD2 PRO A 533     131.800  33.040  25.420  1.00  0.00           H
ATOM   3730  CG  PRO A 533     133.210  34.100  26.610  1.00  0.00           C
ATOM   3731  HG1 PRO A 533     133.050  34.000  27.680  1.00  0.00           H
ATOM   3732  HG2 PRO A 533     132.750  35.010  26.230  1.00  0.00           H
ATOM   3733  CB  PRO A 533     134.720  34.200  26.350  1.00  0.00           C
ATOM   3734  HB1 PRO A 533     135.330  33.820  27.170  1.00  0.00           H
ATOM   3735  HB2 PRO A 533     135.020  35.230  26.170  1.00  0.00           H
ATOM   3736  CA  PRO A 533     135.000  33.280  25.150  1.00  0.00           C
ATOM   3737  HA  PRO A 533     135.330  33.810  24.260  1.00  0.00           H
ATOM   3738  C   PRO A 533     136.150  32.340  25.430  1.00  0.00           C
ATOM   3739  O   PRO A 533     136.050  31.360  26.150  1.00  0.00           O
ATOM   3740  N   ARG A 534     137.290  32.660  24.810  1.00  0.00           N
ATOM   3741  H   ARG A 534     137.330  33.560  24.350  1.00  0.00           H
ATOM   3742  CA  ARG A 534     138.590  31.860  24.850  1.00  0.00           C
ATOM   3743  HA  ARG A 534     138.540  31.310  25.790  1.00  0.00           H
ATOM   3744  CB  ARG A 534     138.710  30.890  23.670  1.00  0.00           C
ATOM   3745  HB1 ARG A 534     139.680  30.390  23.700  1.00  0.00           H
ATOM   3746  HB2 ARG A 534     138.700  31.590  22.830  1.00  0.00           H
ATOM   3747  CG  ARG A 534     137.620  29.780  23.620  1.00  0.00           C
ATOM   3748  HG1 ARG A 534     137.800  29.190  22.720  1.00  0.00           H
ATOM   3749  HG2 ARG A 534     136.650  30.260  23.500  1.00  0.00           H
ATOM   3750  CD  ARG A 534     137.760  28.770  24.850  1.00  0.00           C
ATOM   3751  HD1 ARG A 534     137.610  29.310  25.780  1.00  0.00           H
ATOM   3752  HD2 ARG A 534     138.750  28.330  24.780  1.00  0.00           H
ATOM   3753  NE  ARG A 534     136.800  27.700  24.880  1.00  0.00           N
ATOM   3754  HE  ARG A 534     137.120  26.850  24.440  1.00  0.00           H
ATOM   3755  CZ  ARG A 534     135.570  27.760  25.260  1.00  0.00           C
ATOM   3756  NH1 ARG A 534     134.710  26.770  24.990  1.00  0.00           N
ATOM   3757 1HH1 ARG A 534     135.120  25.900  24.670  1.00  0.00           H
ATOM   3758 2HH1 ARG A 534     133.830  26.830  25.480  1.00  0.00           H
ATOM   3759  NH2 ARG A 534     135.100  28.750  25.910  1.00  0.00           N
ATOM   3760 1HH2 ARG A 534     135.650  29.590  26.030  1.00  0.00           H
ATOM   3761 2HH2 ARG A 534     134.110  28.750  26.110  1.00  0.00           H
ATOM   3762  C   ARG A 534     139.810  32.730  24.880  1.00  0.00           C
ATOM   3763  O   ARG A 534     139.750  33.950  24.590  1.00  0.00           O
ATOM   3764  N   LEU A 535     140.970  32.140  25.310  1.00  0.00           N
ATOM   3765  H   LEU A 535     140.900  31.160  25.520  1.00  0.00           H
ATOM   3766  CA  LEU A 535     142.170  32.900  25.530  1.00  0.00           C
ATOM   3767  HA  LEU A 535     141.910  33.960  25.530  1.00  0.00           H
ATOM   3768  CB  LEU A 535     142.760  32.490  26.920  1.00  0.00           C
ATOM   3769  HB1 LEU A 535     143.650  33.110  27.080  1.00  0.00           H
ATOM   3770  HB2 LEU A 535     142.890  31.410  26.970  1.00  0.00           H
ATOM   3771  CG  LEU A 535     141.780  32.830  28.090  1.00  0.00           C
ATOM   3772  HG  LEU A 535     140.720  32.800  27.840  1.00  0.00           H
ATOM   3773  CD1 LEU A 535     142.150  31.970  29.290  1.00  0.00           C
ATOM   3774 1HD1 LEU A 535     143.230  31.790  29.310  1.00  0.00           H
ATOM   3775 2HD1 LEU A 535     141.910  32.400  30.270  1.00  0.00           H
ATOM   3776 3HD1 LEU A 535     141.700  30.990  29.190  1.00  0.00           H
ATOM   3777  CD2 LEU A 535     141.980  34.270  28.560  1.00  0.00           C
ATOM   3778 1HD2 LEU A 535     141.340  34.540  29.410  1.00  0.00           H
ATOM   3779 2HD2 LEU A 535     142.950  34.380  29.050  1.00  0.00           H
ATOM   3780 3HD2 LEU A 535     141.910  34.960  27.720  1.00  0.00           H
ATOM   3781  C   LEU A 535     143.220  32.790  24.390  1.00  0.00           C
ATOM   3782  O   LEU A 535     143.280  31.780  23.750  1.00  0.00           O
ATOM   3783  N   LYS A 536     144.160  33.790  24.220  1.00  0.00           N
ATOM   3784  H   LYS A 536     144.060  34.600  24.820  1.00  0.00           H
ATOM   3785  CA  LYS A 536     145.220  33.730  23.250  1.00  0.00           C
ATOM   3786  HA  LYS A 536     145.440  32.740  22.860  1.00  0.00           H
ATOM   3787  CB  LYS A 536     144.750  34.600  22.050  1.00  0.00           C
ATOM   3788  HB1 LYS A 536     144.100  34.020  21.400  1.00  0.00           H
ATOM   3789  HB2 LYS A 536     145.590  34.840  21.410  1.00  0.00           H
ATOM   3790  CG  LYS A 536     144.100  35.970  22.350  1.00  0.00           C
ATOM   3791  HG1 LYS A 536     144.680  36.630  23.000  1.00  0.00           H
ATOM   3792  HG2 LYS A 536     143.040  35.970  22.630  1.00  0.00           H
ATOM   3793  CD  LYS A 536     144.000  36.720  21.020  1.00  0.00           C
ATOM   3794  HD1 LYS A 536     143.650  36.090  20.210  1.00  0.00           H
ATOM   3795  HD2 LYS A 536     144.960  37.130  20.690  1.00  0.00           H
ATOM   3796  CE  LYS A 536     143.250  38.070  21.140  1.00  0.00           C
ATOM   3797  HE1 LYS A 536     143.480  38.400  22.160  1.00  0.00           H
ATOM   3798  HE2 LYS A 536     142.170  37.910  21.100  1.00  0.00           H
ATOM   3799  NZ  LYS A 536     143.650  39.060  20.140  1.00  0.00           N
ATOM   3800  HZ1 LYS A 536     143.110  39.910  20.130  1.00  0.00           H
ATOM   3801  HZ2 LYS A 536     144.600  39.310  20.380  1.00  0.00           H
ATOM   3802  HZ3 LYS A 536     143.610  38.640  19.220  1.00  0.00           H
ATOM   3803  C   LYS A 536     146.580  34.370  23.690  1.00  0.00           C
ATOM   3804  O   LYS A 536     147.560  34.000  23.130  1.00  0.00           O
ATOM   3805  N   ASN A 537     146.550  35.350  24.590  1.00  0.00           N
ATOM   3806  H   ASN A 537     145.660  35.610  25.000  1.00  0.00           H
ATOM   3807  CA  ASN A 537     147.770  36.130  24.820  1.00  0.00           C
ATOM   3808  HA  ASN A 537     148.270  36.440  23.900  1.00  0.00           H
ATOM   3809  CB  ASN A 537     147.370  37.450  25.520  1.00  0.00           C
ATOM   3810  HB1 ASN A 537     148.300  37.950  25.800  1.00  0.00           H
ATOM   3811  HB2 ASN A 537     146.800  37.190  26.420  1.00  0.00           H
ATOM   3812  CG  ASN A 537     146.460  38.340  24.740  1.00  0.00           C
ATOM   3813  OD1 ASN A 537     146.500  38.440  23.560  1.00  0.00           O
ATOM   3814  ND2 ASN A 537     145.450  38.860  25.310  1.00  0.00           N
ATOM   3815 1HD2 ASN A 537     145.390  38.740  26.310  1.00  0.00           H
ATOM   3816 2HD2 ASN A 537     144.760  39.390  24.800  1.00  0.00           H
ATOM   3817  C   ASN A 537     148.790  35.410  25.730  1.00  0.00           C
ATOM   3818  O   ASN A 537     148.820  35.410  26.970  1.00  0.00           O
ATOM   3819  N   LEU A 538     149.620  34.600  25.100  1.00  0.00           N
ATOM   3820  H   LEU A 538     149.610  34.640  24.090  1.00  0.00           H
ATOM   3821  CA  LEU A 538     150.380  33.490  25.730  1.00  0.00           C
ATOM   3822  HA  LEU A 538     149.640  32.910  26.280  1.00  0.00           H
ATOM   3823  CB  LEU A 538     151.070  32.750  24.630  1.00  0.00           C
ATOM   3824  HB1 LEU A 538     151.820  32.030  24.960  1.00  0.00           H
ATOM   3825  HB2 LEU A 538     151.670  33.490  24.090  1.00  0.00           H
ATOM   3826  CG  LEU A 538     150.220  32.130  23.490  1.00  0.00           C
ATOM   3827  HG  LEU A 538     149.660  32.890  22.950  1.00  0.00           H
ATOM   3828  CD1 LEU A 538     151.150  31.670  22.400  1.00  0.00           C
ATOM   3829 1HD1 LEU A 538     151.990  31.090  22.800  1.00  0.00           H
ATOM   3830 2HD1 LEU A 538     150.650  30.950  21.760  1.00  0.00           H
ATOM   3831 3HD1 LEU A 538     151.470  32.520  21.810  1.00  0.00           H
ATOM   3832  CD2 LEU A 538     149.300  31.050  23.990  1.00  0.00           C
ATOM   3833 1HD2 LEU A 538     149.840  30.460  24.730  1.00  0.00           H
ATOM   3834 2HD2 LEU A 538     148.460  31.580  24.450  1.00  0.00           H
ATOM   3835 3HD2 LEU A 538     148.890  30.520  23.130  1.00  0.00           H
ATOM   3836  C   LEU A 538     151.410  33.970  26.710  1.00  0.00           C
ATOM   3837  O   LEU A 538     151.750  33.270  27.630  1.00  0.00           O
ATOM   3838  N   HIS A 539     151.760  35.260  26.640  1.00  0.00           N
ATOM   3839  H   HIS A 539     151.390  35.800  25.870  1.00  0.00           H
ATOM   3840  CA  HIS A 539     152.590  35.920  27.740  1.00  0.00           C
ATOM   3841  HA  HIS A 539     153.400  35.230  27.980  1.00  0.00           H
ATOM   3842  CB  HIS A 539     153.210  37.200  27.200  1.00  0.00           C
ATOM   3843  HB1 HIS A 539     153.420  37.130  26.130  1.00  0.00           H
ATOM   3844  HB2 HIS A 539     154.150  37.410  27.710  1.00  0.00           H
ATOM   3845  CG  HIS A 539     152.370  38.440  27.430  1.00  0.00           C
ATOM   3846  ND1 HIS A 539     151.300  38.840  26.660  1.00  0.00           N
ATOM   3847  CE1 HIS A 539     150.790  39.920  27.290  1.00  0.00           C
ATOM   3848  HE1 HIS A 539     150.090  40.630  26.860  1.00  0.00           H
ATOM   3849  NE2 HIS A 539     151.540  40.200  28.390  1.00  0.00           N
ATOM   3850  HE2 HIS A 539     151.490  41.060  28.930  1.00  0.00           H
ATOM   3851  CD2 HIS A 539     152.410  39.210  28.580  1.00  0.00           C
ATOM   3852  HD2 HIS A 539     153.150  39.010  29.340  1.00  0.00           H
ATOM   3853  C   HIS A 539     151.820  36.010  29.080  1.00  0.00           C
ATOM   3854  O   HIS A 539     152.520  36.070  30.070  1.00  0.00           O
ATOM   3855  N   LYS A 540     150.480  36.030  29.050  1.00  0.00           N
ATOM   3856  H   LYS A 540     150.030  36.070  28.150  1.00  0.00           H
ATOM   3857  CA  LYS A 540     149.620  36.330  30.230  1.00  0.00           C
ATOM   3858  HA  LYS A 540     150.210  36.680  31.080  1.00  0.00           H
ATOM   3859  CB  LYS A 540     148.440  37.190  29.800  1.00  0.00           C
ATOM   3860  HB1 LYS A 540     147.580  36.650  29.400  1.00  0.00           H
ATOM   3861  HB2 LYS A 540     148.760  37.980  29.110  1.00  0.00           H
ATOM   3862  CG  LYS A 540     147.820  37.970  30.930  1.00  0.00           C
ATOM   3863  HG1 LYS A 540     147.400  37.280  31.660  1.00  0.00           H
ATOM   3864  HG2 LYS A 540     146.970  38.520  30.540  1.00  0.00           H
ATOM   3865  CD  LYS A 540     148.680  38.990  31.660  1.00  0.00           C
ATOM   3866  HD1 LYS A 540     149.670  38.560  31.830  1.00  0.00           H
ATOM   3867  HD2 LYS A 540     148.210  39.310  32.580  1.00  0.00           H
ATOM   3868  CE  LYS A 540     148.820  40.240  30.720  1.00  0.00           C
ATOM   3869  HE1 LYS A 540     147.830  40.500  30.350  1.00  0.00           H
ATOM   3870  HE2 LYS A 540     149.500  40.000  29.910  1.00  0.00           H
ATOM   3871  NZ  LYS A 540     149.360  41.320  31.580  1.00  0.00           N
ATOM   3872  HZ1 LYS A 540     148.760  41.540  32.370  1.00  0.00           H
ATOM   3873  HZ2 LYS A 540     150.300  41.060  31.850  1.00  0.00           H
ATOM   3874  HZ3 LYS A 540     149.490  42.170  31.060  1.00  0.00           H
ATOM   3875  C   LYS A 540     149.060  35.010  30.750  1.00  0.00           C
ATOM   3876  O   LYS A 540     148.870  34.890  31.970  1.00  0.00           O
ATOM   3877  N   VAL A 541     148.760  34.010  29.950  1.00  0.00           N
ATOM   3878  H   VAL A 541     149.300  34.080  29.100  1.00  0.00           H
ATOM   3879  CA  VAL A 541     147.960  32.760  30.310  1.00  0.00           C
ATOM   3880  HA  VAL A 541     147.750  32.890  31.370  1.00  0.00           H
ATOM   3881  CB  VAL A 541     146.620  32.680  29.690  1.00  0.00           C
ATOM   3882  HB  VAL A 541     146.090  31.780  30.010  1.00  0.00           H
ATOM   3883  CG1 VAL A 541     145.630  33.750  30.080  1.00  0.00           C
ATOM   3884 1HG1 VAL A 541     145.670  33.940  31.150  1.00  0.00           H
ATOM   3885 2HG1 VAL A 541     145.850  34.670  29.530  1.00  0.00           H
ATOM   3886 3HG1 VAL A 541     144.620  33.390  29.870  1.00  0.00           H
ATOM   3887  CG2 VAL A 541     146.720  32.620  28.170  1.00  0.00           C
ATOM   3888 1HG2 VAL A 541     147.340  31.780  27.850  1.00  0.00           H
ATOM   3889 2HG2 VAL A 541     145.770  32.390  27.700  1.00  0.00           H
ATOM   3890 3HG2 VAL A 541     147.090  33.550  27.750  1.00  0.00           H
ATOM   3891  C   VAL A 541     148.780  31.470  30.110  1.00  0.00           C
ATOM   3892  O   VAL A 541     149.660  31.520  29.270  1.00  0.00           O
ATOM   3893  N   SER A 542     148.570  30.490  30.940  1.00  0.00           N
ATOM   3894  H   SER A 542     147.970  30.680  31.730  1.00  0.00           H
ATOM   3895  CA  SER A 542     149.070  29.190  30.780  1.00  0.00           C
ATOM   3896  HA  SER A 542     150.090  29.140  30.410  1.00  0.00           H
ATOM   3897  CB  SER A 542     149.270  28.610  32.240  1.00  0.00           C
ATOM   3898  HB1 SER A 542     149.860  29.310  32.830  1.00  0.00           H
ATOM   3899  HB2 SER A 542     149.910  27.730  32.140  1.00  0.00           H
ATOM   3900  OG  SER A 542     148.100  28.230  32.910  1.00  0.00           O
ATOM   3901  HG  SER A 542     148.190  28.260  33.870  1.00  0.00           H
ATOM   3902  C   SER A 542     148.120  28.330  29.950  1.00  0.00           C
ATOM   3903  O   SER A 542     146.870  28.460  30.130  1.00  0.00           O
ATOM   3904  N   PRO A 543     148.690  27.400  29.220  1.00  0.00           N
ATOM   3905  CD  PRO A 543     150.070  27.240  28.890  1.00  0.00           C
ATOM   3906  HD1 PRO A 543     150.610  26.820  29.740  1.00  0.00           H
ATOM   3907  HD2 PRO A 543     150.470  28.230  28.660  1.00  0.00           H
ATOM   3908  CG  PRO A 543     150.080  26.310  27.730  1.00  0.00           C
ATOM   3909  HG1 PRO A 543     151.000  25.730  27.700  1.00  0.00           H
ATOM   3910  HG2 PRO A 543     149.930  26.800  26.760  1.00  0.00           H
ATOM   3911  CB  PRO A 543     148.920  25.430  28.050  1.00  0.00           C
ATOM   3912  HB1 PRO A 543     149.130  24.730  28.860  1.00  0.00           H
ATOM   3913  HB2 PRO A 543     148.580  24.840  27.200  1.00  0.00           H
ATOM   3914  CA  PRO A 543     147.860  26.390  28.600  1.00  0.00           C
ATOM   3915  HA  PRO A 543     147.180  26.860  27.890  1.00  0.00           H
ATOM   3916  C   PRO A 543     146.910  25.630  29.540  1.00  0.00           C
ATOM   3917  O   PRO A 543     145.850  25.200  29.040  1.00  0.00           O
ATOM   3918  N   SER A 544     147.200  25.460  30.810  1.00  0.00           N
ATOM   3919  H   SER A 544     148.100  25.780  31.130  1.00  0.00           H
ATOM   3920  CA  SER A 544     146.300  24.680  31.700  1.00  0.00           C
ATOM   3921  HA  SER A 544     145.950  23.810  31.140  1.00  0.00           H
ATOM   3922  CB  SER A 544     147.150  24.080  32.930  1.00  0.00           C
ATOM   3923  HB1 SER A 544     147.670  23.160  32.660  1.00  0.00           H
ATOM   3924  HB2 SER A 544     146.500  23.760  33.740  1.00  0.00           H
ATOM   3925  OG  SER A 544     148.160  24.960  33.620  1.00  0.00           O
ATOM   3926  HG  SER A 544     148.960  25.070  33.090  1.00  0.00           H
ATOM   3927  C   SER A 544     145.040  25.540  32.080  1.00  0.00           C
ATOM   3928  O   SER A 544     143.970  25.010  32.190  1.00  0.00           O
ATOM   3929  N   LEU A 545     145.220  26.850  32.280  1.00  0.00           N
ATOM   3930  H   LEU A 545     146.190  27.150  32.280  1.00  0.00           H
ATOM   3931  CA  LEU A 545     144.050  27.750  32.420  1.00  0.00           C
ATOM   3932  HA  LEU A 545     143.380  27.250  33.120  1.00  0.00           H
ATOM   3933  CB  LEU A 545     144.550  29.090  32.920  1.00  0.00           C
ATOM   3934  HB1 LEU A 545     145.120  29.640  32.160  1.00  0.00           H
ATOM   3935  HB2 LEU A 545     145.330  29.000  33.680  1.00  0.00           H
ATOM   3936  CG  LEU A 545     143.440  29.870  33.640  1.00  0.00           C
ATOM   3937  HG  LEU A 545     142.780  29.220  34.220  1.00  0.00           H
ATOM   3938  CD1 LEU A 545     143.940  30.920  34.540  1.00  0.00           C
ATOM   3939 1HD1 LEU A 545     143.090  31.180  35.170  1.00  0.00           H
ATOM   3940 2HD1 LEU A 545     144.750  30.580  35.190  1.00  0.00           H
ATOM   3941 3HD1 LEU A 545     144.290  31.780  33.980  1.00  0.00           H
ATOM   3942  CD2 LEU A 545     142.540  30.500  32.670  1.00  0.00           C
ATOM   3943 1HD2 LEU A 545     143.060  30.710  31.730  1.00  0.00           H
ATOM   3944 2HD2 LEU A 545     141.700  29.830  32.480  1.00  0.00           H
ATOM   3945 3HD2 LEU A 545     142.120  31.450  33.000  1.00  0.00           H
ATOM   3946  C   LEU A 545     143.280  27.830  31.120  1.00  0.00           C
ATOM   3947  O   LEU A 545     142.060  27.740  30.990  1.00  0.00           O
ATOM   3948  N   LYS A 546     143.970  28.030  29.960  1.00  0.00           N
ATOM   3949  H   LYS A 546     144.960  28.210  30.080  1.00  0.00           H
ATOM   3950  CA  LYS A 546     143.380  28.210  28.600  1.00  0.00           C
ATOM   3951  HA  LYS A 546     142.680  29.050  28.660  1.00  0.00           H
ATOM   3952  CB  LYS A 546     144.530  28.500  27.660  1.00  0.00           C
ATOM   3953  HB1 LYS A 546     145.320  27.760  27.770  1.00  0.00           H
ATOM   3954  HB2 LYS A 546     145.010  29.460  27.850  1.00  0.00           H
ATOM   3955  CG  LYS A 546     144.230  28.510  26.110  1.00  0.00           C
ATOM   3956  HG1 LYS A 546     143.520  29.290  25.870  1.00  0.00           H
ATOM   3957  HG2 LYS A 546     143.800  27.590  25.690  1.00  0.00           H
ATOM   3958  CD  LYS A 546     145.480  28.740  25.270  1.00  0.00           C
ATOM   3959  HD1 LYS A 546     146.340  28.140  25.550  1.00  0.00           H
ATOM   3960  HD2 LYS A 546     145.710  29.800  25.410  1.00  0.00           H
ATOM   3961  CE  LYS A 546     145.010  28.620  23.810  1.00  0.00           C
ATOM   3962  HE1 LYS A 546     145.740  29.060  23.140  1.00  0.00           H
ATOM   3963  HE2 LYS A 546     144.090  29.170  23.630  1.00  0.00           H
ATOM   3964  NZ  LYS A 546     144.630  27.250  23.380  1.00  0.00           N
ATOM   3965  HZ1 LYS A 546     143.840  26.850  23.870  1.00  0.00           H
ATOM   3966  HZ2 LYS A 546     144.430  27.300  22.390  1.00  0.00           H
ATOM   3967  HZ3 LYS A 546     145.410  26.620  23.470  1.00  0.00           H
ATOM   3968  C   LYS A 546     142.480  27.040  28.240  1.00  0.00           C
ATOM   3969  O   LYS A 546     141.370  27.200  27.650  1.00  0.00           O
ATOM   3970  N   GLY A 547     142.780  25.810  28.620  1.00  0.00           N
ATOM   3971  H   GLY A 547     143.720  25.720  28.970  1.00  0.00           H
ATOM   3972  CA  GLY A 547     142.000  24.580  28.500  1.00  0.00           C
ATOM   3973  HA1 GLY A 547     142.610  23.680  28.470  1.00  0.00           H
ATOM   3974  HA2 GLY A 547     141.530  24.590  27.520  1.00  0.00           H
ATOM   3975  C   GLY A 547     141.000  24.340  29.620  1.00  0.00           C
ATOM   3976  O   GLY A 547     139.880  23.790  29.340  1.00  0.00           O
ATOM   3977  N   PHE A 548     141.320  24.780  30.830  1.00  0.00           N
ATOM   3978  H   PHE A 548     142.200  25.260  30.950  1.00  0.00           H
ATOM   3979  CA  PHE A 548     140.380  24.860  31.920  1.00  0.00           C
ATOM   3980  HA  PHE A 548     139.930  23.870  31.990  1.00  0.00           H
ATOM   3981  CB  PHE A 548     141.040  25.370  33.230  1.00  0.00           C
ATOM   3982  HB1 PHE A 548     141.450  26.380  33.100  1.00  0.00           H
ATOM   3983  HB2 PHE A 548     141.840  24.710  33.570  1.00  0.00           H
ATOM   3984  CG  PHE A 548     140.090  25.450  34.410  1.00  0.00           C
ATOM   3985  CD1 PHE A 548     139.480  24.310  34.870  1.00  0.00           C
ATOM   3986  HD1 PHE A 548     139.710  23.360  34.420  1.00  0.00           H
ATOM   3987  CE1 PHE A 548     138.660  24.340  36.040  1.00  0.00           C
ATOM   3988  HE1 PHE A 548     138.130  23.450  36.350  1.00  0.00           H
ATOM   3989  CZ  PHE A 548     138.580  25.550  36.750  1.00  0.00           C
ATOM   3990  HZ  PHE A 548     138.020  25.620  37.670  1.00  0.00           H
ATOM   3991  CE2 PHE A 548     139.160  26.730  36.250  1.00  0.00           C
ATOM   3992  HE2 PHE A 548     139.010  27.660  36.770  1.00  0.00           H
ATOM   3993  CD2 PHE A 548     139.950  26.660  35.090  1.00  0.00           C
ATOM   3994  HD2 PHE A 548     140.370  27.590  34.730  1.00  0.00           H
ATOM   3995  C   PHE A 548     139.140  25.800  31.590  1.00  0.00           C
ATOM   3996  O   PHE A 548     137.980  25.360  31.770  1.00  0.00           O
ATOM   3997  N   LEU A 549     139.380  26.920  31.010  1.00  0.00           N
ATOM   3998  H   LEU A 549     140.310  27.260  30.810  1.00  0.00           H
ATOM   3999  CA  LEU A 549     138.300  27.770  30.400  1.00  0.00           C
ATOM   4000  HA  LEU A 549     137.690  28.110  31.240  1.00  0.00           H
ATOM   4001  CB  LEU A 549     138.890  29.080  29.870  1.00  0.00           C
ATOM   4002  HB1 LEU A 549     139.270  29.040  28.850  1.00  0.00           H
ATOM   4003  HB2 LEU A 549     139.720  29.380  30.510  1.00  0.00           H
ATOM   4004  CG  LEU A 549     137.860  30.240  29.910  1.00  0.00           C
ATOM   4005  HG  LEU A 549     136.880  29.890  29.580  1.00  0.00           H
ATOM   4006  CD1 LEU A 549     137.680  30.820  31.330  1.00  0.00           C
ATOM   4007 1HD1 LEU A 549     137.120  31.740  31.250  1.00  0.00           H
ATOM   4008 2HD1 LEU A 549     137.110  30.130  31.950  1.00  0.00           H
ATOM   4009 3HD1 LEU A 549     138.560  31.220  31.840  1.00  0.00           H
ATOM   4010  CD2 LEU A 549     138.330  31.300  28.900  1.00  0.00           C
ATOM   4011 1HD2 LEU A 549     139.310  31.630  29.260  1.00  0.00           H
ATOM   4012 2HD2 LEU A 549     138.420  30.840  27.920  1.00  0.00           H
ATOM   4013 3HD2 LEU A 549     137.700  32.170  28.750  1.00  0.00           H
ATOM   4014  C   LEU A 549     137.530  26.960  29.330  1.00  0.00           C
ATOM   4015  O   LEU A 549     136.300  27.000  29.250  1.00  0.00           O
ATOM   4016  N   ASP A 550     138.200  26.120  28.480  1.00  0.00           N
ATOM   4017  H   ASP A 550     139.210  26.050  28.480  1.00  0.00           H
ATOM   4018  CA  ASP A 550     137.550  25.260  27.430  1.00  0.00           C
ATOM   4019  HA  ASP A 550     136.790  25.910  26.990  1.00  0.00           H
ATOM   4020  CB  ASP A 550     138.590  24.880  26.330  1.00  0.00           C
ATOM   4021  HB1 ASP A 550     139.260  24.190  26.850  1.00  0.00           H
ATOM   4022  HB2 ASP A 550     139.070  25.820  26.050  1.00  0.00           H
ATOM   4023  CG  ASP A 550     137.910  24.300  25.070  1.00  0.00           C
ATOM   4024  OD1 ASP A 550     138.500  23.340  24.570  1.00  0.00           O
ATOM   4025  OD2 ASP A 550     136.930  24.870  24.570  1.00  0.00           O
ATOM   4026  C   ASP A 550     136.880  24.050  27.990  1.00  0.00           C
ATOM   4027  O   ASP A 550     136.210  23.380  27.240  1.00  0.00           O
ATOM   4028  N   ARG A 551     136.810  23.920  29.370  1.00  0.00           N
ATOM   4029  H   ARG A 551     137.330  24.520  29.990  1.00  0.00           H
ATOM   4030  CA  ARG A 551     135.870  23.000  30.060  1.00  0.00           C
ATOM   4031  HA  ARG A 551     135.400  22.400  29.280  1.00  0.00           H
ATOM   4032  CB  ARG A 551     136.580  22.020  31.010  1.00  0.00           C
ATOM   4033  HB1 ARG A 551     135.840  21.420  31.530  1.00  0.00           H
ATOM   4034  HB2 ARG A 551     137.010  22.610  31.820  1.00  0.00           H
ATOM   4035  CG  ARG A 551     137.720  21.150  30.480  1.00  0.00           C
ATOM   4036  HG1 ARG A 551     137.910  20.480  31.310  1.00  0.00           H
ATOM   4037  HG2 ARG A 551     138.540  21.790  30.160  1.00  0.00           H
ATOM   4038  CD  ARG A 551     137.170  20.310  29.230  1.00  0.00           C
ATOM   4039  HD1 ARG A 551     136.980  21.040  28.430  1.00  0.00           H
ATOM   4040  HD2 ARG A 551     136.160  19.910  29.360  1.00  0.00           H
ATOM   4041  NE  ARG A 551     138.140  19.270  28.750  1.00  0.00           N
ATOM   4042  HE  ARG A 551     139.120  19.430  28.930  1.00  0.00           H
ATOM   4043  CZ  ARG A 551     137.800  18.270  27.990  1.00  0.00           C
ATOM   4044  NH1 ARG A 551     136.610  18.130  27.520  1.00  0.00           N
ATOM   4045 1HH1 ARG A 551     135.920  18.860  27.610  1.00  0.00           H
ATOM   4046 2HH1 ARG A 551     136.310  17.320  26.990  1.00  0.00           H
ATOM   4047  NH2 ARG A 551     138.720  17.390  27.780  1.00  0.00           N
ATOM   4048 1HH2 ARG A 551     139.650  17.550  28.160  1.00  0.00           H
ATOM   4049 2HH2 ARG A 551     138.580  16.720  27.040  1.00  0.00           H
ATOM   4050  C   ARG A 551     134.810  23.670  30.840  1.00  0.00           C
ATOM   4051  O   ARG A 551     133.750  23.050  31.030  1.00  0.00           O
ATOM   4052  N   LEU A 552     135.020  24.990  31.180  1.00  0.00           N
ATOM   4053  H   LEU A 552     135.900  25.430  30.940  1.00  0.00           H
ATOM   4054  CA  LEU A 552     134.040  25.760  31.930  1.00  0.00           C
ATOM   4055  HA  LEU A 552     133.580  25.040  32.600  1.00  0.00           H
ATOM   4056  CB  LEU A 552     134.770  26.850  32.900  1.00  0.00           C
ATOM   4057  HB1 LEU A 552     134.030  27.600  33.190  1.00  0.00           H
ATOM   4058  HB2 LEU A 552     135.390  27.430  32.220  1.00  0.00           H
ATOM   4059  CG  LEU A 552     135.580  26.500  34.140  1.00  0.00           C
ATOM   4060  HG  LEU A 552     136.370  25.840  33.780  1.00  0.00           H
ATOM   4061  CD1 LEU A 552     136.330  27.770  34.620  1.00  0.00           C
ATOM   4062 1HD1 LEU A 552     136.890  27.440  35.500  1.00  0.00           H
ATOM   4063 2HD1 LEU A 552     137.030  28.120  33.870  1.00  0.00           H
ATOM   4064 3HD1 LEU A 552     135.700  28.540  35.070  1.00  0.00           H
ATOM   4065  CD2 LEU A 552     134.780  25.880  35.300  1.00  0.00           C
ATOM   4066 1HD2 LEU A 552     134.110  26.640  35.690  1.00  0.00           H
ATOM   4067 2HD2 LEU A 552     134.150  25.060  34.950  1.00  0.00           H
ATOM   4068 3HD2 LEU A 552     135.490  25.650  36.090  1.00  0.00           H
ATOM   4069  C   LEU A 552     133.000  26.380  30.970  1.00  0.00           C
ATOM   4070  O   LEU A 552     131.760  26.270  31.160  1.00  0.00           O
ATOM   4071  N   LEU A 553     133.530  27.090  29.980  1.00  0.00           N
ATOM   4072  H   LEU A 553     134.530  27.100  29.870  1.00  0.00           H
ATOM   4073  CA  LEU A 553     132.740  27.900  29.030  1.00  0.00           C
ATOM   4074  HA  LEU A 553     131.800  28.250  29.450  1.00  0.00           H
ATOM   4075  CB  LEU A 553     133.460  29.250  28.570  1.00  0.00           C
ATOM   4076  HB1 LEU A 553     132.910  29.710  27.750  1.00  0.00           H
ATOM   4077  HB2 LEU A 553     134.450  28.900  28.280  1.00  0.00           H
ATOM   4078  CG  LEU A 553     133.600  30.360  29.640  1.00  0.00           C
ATOM   4079  HG  LEU A 553     134.200  30.000  30.480  1.00  0.00           H
ATOM   4080  CD1 LEU A 553     134.370  31.550  29.060  1.00  0.00           C
ATOM   4081 1HD1 LEU A 553     134.390  32.510  29.570  1.00  0.00           H
ATOM   4082 2HD1 LEU A 553     135.320  31.090  28.790  1.00  0.00           H
ATOM   4083 3HD1 LEU A 553     133.830  31.680  28.120  1.00  0.00           H
ATOM   4084  CD2 LEU A 553     132.220  30.960  30.070  1.00  0.00           C
ATOM   4085 1HD2 LEU A 553     132.340  31.770  30.790  1.00  0.00           H
ATOM   4086 2HD2 LEU A 553     131.600  31.350  29.270  1.00  0.00           H
ATOM   4087 3HD2 LEU A 553     131.730  30.120  30.570  1.00  0.00           H
ATOM   4088  C   LEU A 553     132.370  27.010  27.810  1.00  0.00           C
ATOM   4089  O   LEU A 553     132.560  27.510  26.670  1.00  0.00           O
ATOM   4090  N   VAL A 554     131.990  25.760  28.020  1.00  0.00           N
ATOM   4091  H   VAL A 554     131.860  25.460  28.970  1.00  0.00           H
ATOM   4092  CA  VAL A 554     131.450  24.950  26.930  1.00  0.00           C
ATOM   4093  HA  VAL A 554     132.040  25.140  26.030  1.00  0.00           H
ATOM   4094  CB  VAL A 554     131.640  23.470  27.220  1.00  0.00           C
ATOM   4095  HB  VAL A 554     131.110  23.340  28.160  1.00  0.00           H
ATOM   4096  CG1 VAL A 554     131.020  22.610  26.190  1.00  0.00           C
ATOM   4097 1HG1 VAL A 554     131.240  22.820  25.150  1.00  0.00           H
ATOM   4098 2HG1 VAL A 554     131.220  21.570  26.440  1.00  0.00           H
ATOM   4099 3HG1 VAL A 554     129.940  22.730  26.270  1.00  0.00           H
ATOM   4100  CG2 VAL A 554     133.170  23.160  27.390  1.00  0.00           C
ATOM   4101 1HG2 VAL A 554     133.700  23.360  26.450  1.00  0.00           H
ATOM   4102 2HG2 VAL A 554     133.510  23.680  28.280  1.00  0.00           H
ATOM   4103 3HG2 VAL A 554     133.200  22.110  27.680  1.00  0.00           H
ATOM   4104  C   VAL A 554     130.030  25.440  26.630  1.00  0.00           C
ATOM   4105  O   VAL A 554     129.100  25.620  27.490  1.00  0.00           O
ATOM   4106  N   ARG A 555     129.760  25.850  25.380  1.00  0.00           N
ATOM   4107  H   ARG A 555     130.460  25.780  24.650  1.00  0.00           H
ATOM   4108  CA  ARG A 555     128.500  26.560  24.960  1.00  0.00           C
ATOM   4109  HA  ARG A 555     128.440  27.370  25.690  1.00  0.00           H
ATOM   4110  CB  ARG A 555     128.560  27.080  23.550  1.00  0.00           C
ATOM   4111  HB1 ARG A 555     128.600  26.250  22.850  1.00  0.00           H
ATOM   4112  HB2 ARG A 555     129.520  27.610  23.580  1.00  0.00           H
ATOM   4113  CG  ARG A 555     127.320  28.050  23.300  1.00  0.00           C
ATOM   4114  HG1 ARG A 555     127.490  28.830  24.040  1.00  0.00           H
ATOM   4115  HG2 ARG A 555     126.400  27.550  23.610  1.00  0.00           H
ATOM   4116  CD  ARG A 555     127.060  28.580  21.850  1.00  0.00           C
ATOM   4117  HD1 ARG A 555     126.990  27.720  21.190  1.00  0.00           H
ATOM   4118  HD2 ARG A 555     127.930  29.140  21.500  1.00  0.00           H
ATOM   4119  NE  ARG A 555     125.900  29.440  21.700  1.00  0.00           N
ATOM   4120  HE  ARG A 555     125.860  30.290  22.230  1.00  0.00           H
ATOM   4121  CZ  ARG A 555     124.820  29.230  20.960  1.00  0.00           C
ATOM   4122  NH1 ARG A 555     124.620  28.210  20.230  1.00  0.00           N
ATOM   4123 1HH1 ARG A 555     125.430  27.630  20.020  1.00  0.00           H
ATOM   4124 2HH1 ARG A 555     123.760  28.240  19.700  1.00  0.00           H
ATOM   4125  NH2 ARG A 555     123.960  30.200  20.960  1.00  0.00           N
ATOM   4126 1HH2 ARG A 555     124.210  31.020  21.500  1.00  0.00           H
ATOM   4127 2HH2 ARG A 555     123.160  30.150  20.350  1.00  0.00           H
ATOM   4128  C   ARG A 555     127.300  25.550  25.250  1.00  0.00           C
ATOM   4129  O   ARG A 555     126.250  25.930  25.840  1.00  0.00           O
ATOM   4130  N   ASP A 556     127.470  24.250  24.900  1.00  0.00           N
ATOM   4131  H   ASP A 556     128.310  24.000  24.400  1.00  0.00           H
ATOM   4132  CA  ASP A 556     126.420  23.290  24.930  1.00  0.00           C
ATOM   4133  HA  ASP A 556     125.470  23.770  24.710  1.00  0.00           H
ATOM   4134  CB  ASP A 556     126.680  22.270  23.800  1.00  0.00           C
ATOM   4135  HB1 ASP A 556     127.670  21.820  23.830  1.00  0.00           H
ATOM   4136  HB2 ASP A 556     126.620  22.800  22.850  1.00  0.00           H
ATOM   4137  CG  ASP A 556     125.580  21.220  23.770  1.00  0.00           C
ATOM   4138  OD1 ASP A 556     125.770  20.130  24.430  1.00  0.00           O
ATOM   4139  OD2 ASP A 556     124.500  21.430  23.170  1.00  0.00           O
ATOM   4140  C   ASP A 556     126.320  22.690  26.300  1.00  0.00           C
ATOM   4141  O   ASP A 556     127.340  22.200  26.750  1.00  0.00           O
ATOM   4142  N   PRO A 557     125.170  22.510  26.930  1.00  0.00           N
ATOM   4143  CD  PRO A 557     123.840  22.720  26.370  1.00  0.00           C
ATOM   4144  HD1 PRO A 557     123.450  21.790  25.960  1.00  0.00           H
ATOM   4145  HD2 PRO A 557     123.800  23.510  25.620  1.00  0.00           H
ATOM   4146  CG  PRO A 557     122.980  23.160  27.550  1.00  0.00           C
ATOM   4147  HG1 PRO A 557     121.940  22.890  27.360  1.00  0.00           H
ATOM   4148  HG2 PRO A 557     123.180  24.220  27.680  1.00  0.00           H
ATOM   4149  CB  PRO A 557     123.590  22.360  28.700  1.00  0.00           C
ATOM   4150  HB1 PRO A 557     122.950  21.480  28.750  1.00  0.00           H
ATOM   4151  HB2 PRO A 557     123.680  22.890  29.650  1.00  0.00           H
ATOM   4152  CA  PRO A 557     125.010  21.970  28.290  1.00  0.00           C
ATOM   4153  HA  PRO A 557     125.720  22.550  28.880  1.00  0.00           H
ATOM   4154  C   PRO A 557     125.300  20.500  28.440  1.00  0.00           C
ATOM   4155  O   PRO A 557     125.680  20.100  29.500  1.00  0.00           O
ATOM   4156  N   ALA A 558     125.200  19.690  27.380  1.00  0.00           N
ATOM   4157  H   ALA A 558     124.930  20.090  26.490  1.00  0.00           H
ATOM   4158  CA  ALA A 558     125.390  18.220  27.370  1.00  0.00           C
ATOM   4159  HA  ALA A 558     125.200  17.890  28.390  1.00  0.00           H
ATOM   4160  CB  ALA A 558     124.400  17.520  26.510  1.00  0.00           C
ATOM   4161  HB1 ALA A 558     124.660  17.640  25.460  1.00  0.00           H
ATOM   4162  HB2 ALA A 558     124.480  16.450  26.710  1.00  0.00           H
ATOM   4163  HB3 ALA A 558     123.380  17.850  26.740  1.00  0.00           H
ATOM   4164  C   ALA A 558     126.890  17.970  27.200  1.00  0.00           C
ATOM   4165  O   ALA A 558     127.460  17.020  27.910  1.00  0.00           O
ATOM   4166  N   GLN A 559     127.600  18.760  26.360  1.00  0.00           N
ATOM   4167  H   GLN A 559     127.160  19.490  25.810  1.00  0.00           H
ATOM   4168  CA  GLN A 559     129.060  18.770  26.290  1.00  0.00           C
ATOM   4169  HA  GLN A 559     129.410  17.740  26.170  1.00  0.00           H
ATOM   4170  CB  GLN A 559     129.560  19.510  25.060  1.00  0.00           C
ATOM   4171  HB1 GLN A 559     129.400  20.590  25.060  1.00  0.00           H
ATOM   4172  HB2 GLN A 559     128.970  19.080  24.250  1.00  0.00           H
ATOM   4173  CG  GLN A 559     130.990  19.430  24.650  1.00  0.00           C
ATOM   4174  HG1 GLN A 559     131.220  18.380  24.440  1.00  0.00           H
ATOM   4175  HG2 GLN A 559     131.720  19.720  25.410  1.00  0.00           H
ATOM   4176  CD  GLN A 559     131.320  20.190  23.370  1.00  0.00           C
ATOM   4177  OE1 GLN A 559     130.780  21.250  23.040  1.00  0.00           O
ATOM   4178  NE2 GLN A 559     132.230  19.600  22.610  1.00  0.00           N
ATOM   4179 1HE2 GLN A 559     132.710  18.760  22.890  1.00  0.00           H
ATOM   4180 2HE2 GLN A 559     132.560  20.120  21.810  1.00  0.00           H
ATOM   4181  C   GLN A 559     129.750  19.380  27.560  1.00  0.00           C
ATOM   4182  O   GLN A 559     130.870  18.940  27.870  1.00  0.00           O
ATOM   4183  N   ARG A 560     129.110  20.320  28.200  1.00  0.00           N
ATOM   4184  H   ARG A 560     128.260  20.530  27.710  1.00  0.00           H
ATOM   4185  CA  ARG A 560     129.620  21.110  29.320  1.00  0.00           C
ATOM   4186  HA  ARG A 560     130.500  21.560  28.870  1.00  0.00           H
ATOM   4187  CB  ARG A 560     128.680  22.230  29.690  1.00  0.00           C
ATOM   4188  HB1 ARG A 560     127.720  21.830  30.050  1.00  0.00           H
ATOM   4189  HB2 ARG A 560     128.360  22.750  28.790  1.00  0.00           H
ATOM   4190  CG  ARG A 560     129.350  23.220  30.690  1.00  0.00           C
ATOM   4191  HG1 ARG A 560     130.300  23.690  30.430  1.00  0.00           H
ATOM   4192  HG2 ARG A 560     129.590  22.570  31.530  1.00  0.00           H
ATOM   4193  CD  ARG A 560     128.440  24.310  31.130  1.00  0.00           C
ATOM   4194  HD1 ARG A 560     129.070  25.060  31.610  1.00  0.00           H
ATOM   4195  HD2 ARG A 560     127.730  23.830  31.810  1.00  0.00           H
ATOM   4196  NE  ARG A 560     127.900  25.020  29.970  1.00  0.00           N
ATOM   4197  HE  ARG A 560     128.550  25.020  29.190  1.00  0.00           H
ATOM   4198  CZ  ARG A 560     126.660  25.520  29.820  1.00  0.00           C
ATOM   4199  NH1 ARG A 560     125.750  25.600  30.790  1.00  0.00           N
ATOM   4200 1HH1 ARG A 560     126.010  25.450  31.760  1.00  0.00           H
ATOM   4201 2HH1 ARG A 560     124.830  25.790  30.430  1.00  0.00           H
ATOM   4202  NH2 ARG A 560     126.140  25.980  28.660  1.00  0.00           N
ATOM   4203 1HH2 ARG A 560     126.610  25.850  27.780  1.00  0.00           H
ATOM   4204 2HH2 ARG A 560     125.170  26.280  28.630  1.00  0.00           H
ATOM   4205  C   ARG A 560     130.110  20.320  30.550  1.00  0.00           C
ATOM   4206  O   ARG A 560     129.340  19.520  30.990  1.00  0.00           O
ATOM   4207  N   ALA A 561     131.340  20.520  31.090  1.00  0.00           N
ATOM   4208  H   ALA A 561     131.930  21.210  30.660  1.00  0.00           H
ATOM   4209  CA  ALA A 561     131.900  19.610  32.100  1.00  0.00           C
ATOM   4210  HA  ALA A 561     131.900  18.560  31.800  1.00  0.00           H
ATOM   4211  CB  ALA A 561     133.340  20.020  32.320  1.00  0.00           C
ATOM   4212  HB1 ALA A 561     133.350  21.060  32.650  1.00  0.00           H
ATOM   4213  HB2 ALA A 561     133.880  19.410  33.050  1.00  0.00           H
ATOM   4214  HB3 ALA A 561     133.890  19.990  31.380  1.00  0.00           H
ATOM   4215  C   ALA A 561     131.130  19.630  33.490  1.00  0.00           C
ATOM   4216  O   ALA A 561     130.420  20.590  33.790  1.00  0.00           O
ATOM   4217  N   THR A 562     131.280  18.640  34.390  1.00  0.00           N
ATOM   4218  H   THR A 562     131.970  17.950  34.150  1.00  0.00           H
ATOM   4219  CA  THR A 562     130.670  18.640  35.730  1.00  0.00           C
ATOM   4220  HA  THR A 562     129.820  19.330  35.680  1.00  0.00           H
ATOM   4221  CB  THR A 562     130.120  17.200  35.970  1.00  0.00           C
ATOM   4222  HB  THR A 562     129.680  17.170  36.960  1.00  0.00           H
ATOM   4223  CG2 THR A 562     129.160  16.680  34.900  1.00  0.00           C
ATOM   4224 1HG2 THR A 562     128.710  15.800  35.360  1.00  0.00           H
ATOM   4225 2HG2 THR A 562     128.430  17.490  34.810  1.00  0.00           H
ATOM   4226 3HG2 THR A 562     129.620  16.450  33.940  1.00  0.00           H
ATOM   4227  OG1 THR A 562     131.160  16.210  35.990  1.00  0.00           O
ATOM   4228  HG1 THR A 562     131.510  16.150  35.100  1.00  0.00           H
ATOM   4229  C   THR A 562     131.620  19.040  36.810  1.00  0.00           C
ATOM   4230  O   THR A 562     132.870  18.990  36.610  1.00  0.00           O
ATOM   4231  N   ALA A 563     131.090  19.460  37.980  1.00  0.00           N
ATOM   4232  H   ALA A 563     130.090  19.480  38.130  1.00  0.00           H
ATOM   4233  CA  ALA A 563     131.970  19.840  39.040  1.00  0.00           C
ATOM   4234  HA  ALA A 563     132.470  20.760  38.720  1.00  0.00           H
ATOM   4235  CB  ALA A 563     131.160  20.130  40.280  1.00  0.00           C
ATOM   4236  HB1 ALA A 563     130.500  20.960  40.060  1.00  0.00           H
ATOM   4237  HB2 ALA A 563     130.540  19.270  40.550  1.00  0.00           H
ATOM   4238  HB3 ALA A 563     131.920  20.230  41.060  1.00  0.00           H
ATOM   4239  C   ALA A 563     133.040  18.750  39.260  1.00  0.00           C
ATOM   4240  O   ALA A 563     134.230  19.090  39.470  1.00  0.00           O
ATOM   4241  N   ALA A 564     132.590  17.510  39.300  1.00  0.00           N
ATOM   4242  H   ALA A 564     131.600  17.400  39.170  1.00  0.00           H
ATOM   4243  CA  ALA A 564     133.350  16.290  39.620  1.00  0.00           C
ATOM   4244  HA  ALA A 564     133.770  16.280  40.630  1.00  0.00           H
ATOM   4245  CB  ALA A 564     132.380  15.020  39.490  1.00  0.00           C
ATOM   4246  HB1 ALA A 564     132.890  14.230  40.040  1.00  0.00           H
ATOM   4247  HB2 ALA A 564     131.360  15.180  39.850  1.00  0.00           H
ATOM   4248  HB3 ALA A 564     132.300  14.780  38.430  1.00  0.00           H
ATOM   4249  C   ALA A 564     134.590  16.030  38.670  1.00  0.00           C
ATOM   4250  O   ALA A 564     135.590  15.460  39.110  1.00  0.00           O
ATOM   4251  N   GLU A 565     134.660  16.610  37.450  1.00  0.00           N
ATOM   4252  H   GLU A 565     133.880  17.180  37.150  1.00  0.00           H
ATOM   4253  CA  GLU A 565     135.680  16.390  36.480  1.00  0.00           C
ATOM   4254  HA  GLU A 565     136.370  15.640  36.860  1.00  0.00           H
ATOM   4255  CB  GLU A 565     135.120  15.900  35.110  1.00  0.00           C
ATOM   4256  HB1 GLU A 565     134.360  15.150  35.310  1.00  0.00           H
ATOM   4257  HB2 GLU A 565     135.970  15.540  34.530  1.00  0.00           H
ATOM   4258  CG  GLU A 565     134.430  17.030  34.320  1.00  0.00           C
ATOM   4259  HG1 GLU A 565     135.190  17.700  33.910  1.00  0.00           H
ATOM   4260  HG2 GLU A 565     133.890  17.550  35.110  1.00  0.00           H
ATOM   4261  CD  GLU A 565     133.550  16.400  33.210  1.00  0.00           C
ATOM   4262  OE1 GLU A 565     132.400  15.980  33.500  1.00  0.00           O
ATOM   4263  OE2 GLU A 565     134.060  16.340  32.060  1.00  0.00           O
ATOM   4264  C   GLU A 565     136.600  17.590  36.400  1.00  0.00           C
ATOM   4265  O   GLU A 565     137.810  17.530  36.170  1.00  0.00           O
ATOM   4266  N   LEU A 566     135.960  18.770  36.680  1.00  0.00           N
ATOM   4267  H   LEU A 566     134.990  18.710  36.940  1.00  0.00           H
ATOM   4268  CA  LEU A 566     136.610  20.060  36.940  1.00  0.00           C
ATOM   4269  HA  LEU A 566     137.250  20.230  36.080  1.00  0.00           H
ATOM   4270  CB  LEU A 566     135.540  21.110  36.980  1.00  0.00           C
ATOM   4271  HB1 LEU A 566     136.060  21.990  37.380  1.00  0.00           H
ATOM   4272  HB2 LEU A 566     134.790  20.880  37.730  1.00  0.00           H
ATOM   4273  CG  LEU A 566     134.780  21.490  35.720  1.00  0.00           C
ATOM   4274  HG  LEU A 566     134.310  20.680  35.150  1.00  0.00           H
ATOM   4275  CD1 LEU A 566     133.580  22.390  36.170  1.00  0.00           C
ATOM   4276 1HD1 LEU A 566     133.960  23.350  36.510  1.00  0.00           H
ATOM   4277 2HD1 LEU A 566     133.020  22.580  35.250  1.00  0.00           H
ATOM   4278 3HD1 LEU A 566     132.920  21.840  36.830  1.00  0.00           H
ATOM   4279  CD2 LEU A 566     135.620  22.350  34.840  1.00  0.00           C
ATOM   4280 1HD2 LEU A 566     135.970  23.250  35.360  1.00  0.00           H
ATOM   4281 2HD2 LEU A 566     136.500  21.840  34.460  1.00  0.00           H
ATOM   4282 3HD2 LEU A 566     135.060  22.670  33.960  1.00  0.00           H
ATOM   4283  C   LEU A 566     137.570  20.010  38.150  1.00  0.00           C
ATOM   4284  O   LEU A 566     138.710  20.430  38.050  1.00  0.00           O
ATOM   4285  N   LEU A 567     137.220  19.300  39.250  1.00  0.00           N
ATOM   4286  H   LEU A 567     136.240  19.060  39.300  1.00  0.00           H
ATOM   4287  CA  LEU A 567     138.120  19.010  40.390  1.00  0.00           C
ATOM   4288  HA  LEU A 567     138.700  19.890  40.640  1.00  0.00           H
ATOM   4289  CB  LEU A 567     137.380  18.400  41.610  1.00  0.00           C
ATOM   4290  HB1 LEU A 567     138.070  18.100  42.400  1.00  0.00           H
ATOM   4291  HB2 LEU A 567     136.800  17.570  41.210  1.00  0.00           H
ATOM   4292  CG  LEU A 567     136.420  19.450  42.180  1.00  0.00           C
ATOM   4293  HG  LEU A 567     135.980  20.020  41.360  1.00  0.00           H
ATOM   4294  CD1 LEU A 567     135.240  18.800  42.790  1.00  0.00           C
ATOM   4295 1HD1 LEU A 567     134.480  18.620  42.020  1.00  0.00           H
ATOM   4296 2HD1 LEU A 567     135.500  17.930  43.400  1.00  0.00           H
ATOM   4297 3HD1 LEU A 567     134.780  19.550  43.430  1.00  0.00           H
ATOM   4298  CD2 LEU A 567     137.260  20.250  43.110  1.00  0.00           C
ATOM   4299 1HD2 LEU A 567     136.660  20.980  43.660  1.00  0.00           H
ATOM   4300 2HD2 LEU A 567     137.660  19.620  43.900  1.00  0.00           H
ATOM   4301 3HD2 LEU A 567     138.000  20.850  42.580  1.00  0.00           H
ATOM   4302  C   LEU A 567     139.330  18.210  39.960  1.00  0.00           C
ATOM   4303  O   LEU A 567     140.380  18.250  40.620  1.00  0.00           O
ATOM   4304  N   LYS A 568     139.260  17.430  38.850  1.00  0.00           N
ATOM   4305  H   LYS A 568     138.450  17.460  38.250  1.00  0.00           H
ATOM   4306  CA  LYS A 568     140.410  16.540  38.460  1.00  0.00           C
ATOM   4307  HA  LYS A 568     141.130  16.700  39.260  1.00  0.00           H
ATOM   4308  CB  LYS A 568     139.940  15.110  38.120  1.00  0.00           C
ATOM   4309  HB1 LYS A 568     140.830  14.500  37.980  1.00  0.00           H
ATOM   4310  HB2 LYS A 568     139.350  15.070  37.200  1.00  0.00           H
ATOM   4311  CG  LYS A 568     139.060  14.520  39.300  1.00  0.00           C
ATOM   4312  HG1 LYS A 568     138.690  13.520  39.070  1.00  0.00           H
ATOM   4313  HG2 LYS A 568     138.170  15.130  39.440  1.00  0.00           H
ATOM   4314  CD  LYS A 568     139.800  14.240  40.590  1.00  0.00           C
ATOM   4315  HD1 LYS A 568     140.110  15.200  41.000  1.00  0.00           H
ATOM   4316  HD2 LYS A 568     140.640  13.610  40.310  1.00  0.00           H
ATOM   4317  CE  LYS A 568     139.140  13.370  41.710  1.00  0.00           C
ATOM   4318  HE1 LYS A 568     138.720  12.430  41.360  1.00  0.00           H
ATOM   4319  HE2 LYS A 568     138.230  13.840  42.090  1.00  0.00           H
ATOM   4320  NZ  LYS A 568     139.980  13.300  42.900  1.00  0.00           N
ATOM   4321  HZ1 LYS A 568     140.670  12.560  42.860  1.00  0.00           H
ATOM   4322  HZ2 LYS A 568     140.440  14.160  43.150  1.00  0.00           H
ATOM   4323  HZ3 LYS A 568     139.520  13.110  43.780  1.00  0.00           H
ATOM   4324  C   LYS A 568     141.150  17.070  37.210  1.00  0.00           C
ATOM   4325  O   LYS A 568     142.130  16.530  36.810  1.00  0.00           O
ATOM   4326  N   HIS A 569     140.830  18.220  36.620  1.00  0.00           N
ATOM   4327  H   HIS A 569     140.110  18.720  37.120  1.00  0.00           H
ATOM   4328  CA  HIS A 569     141.380  18.880  35.470  1.00  0.00           C
ATOM   4329  HA  HIS A 569     141.360  18.220  34.600  1.00  0.00           H
ATOM   4330  CB  HIS A 569     140.420  20.070  34.990  1.00  0.00           C
ATOM   4331  HB1 HIS A 569     140.260  20.830  35.760  1.00  0.00           H
ATOM   4332  HB2 HIS A 569     139.440  19.680  34.710  1.00  0.00           H
ATOM   4333  CG  HIS A 569     140.970  20.810  33.800  1.00  0.00           C
ATOM   4334  ND1 HIS A 569     141.870  21.870  33.840  1.00  0.00           N
ATOM   4335  CE1 HIS A 569     142.200  22.030  32.550  1.00  0.00           C
ATOM   4336  HE1 HIS A 569     142.840  22.830  32.210  1.00  0.00           H
ATOM   4337  NE2 HIS A 569     141.560  21.200  31.700  1.00  0.00           N
ATOM   4338  HE2 HIS A 569     141.790  20.970  30.750  1.00  0.00           H
ATOM   4339  CD2 HIS A 569     140.740  20.480  32.520  1.00  0.00           C
ATOM   4340  HD2 HIS A 569     140.160  19.620  32.220  1.00  0.00           H
ATOM   4341  C   HIS A 569     142.880  19.290  35.740  1.00  0.00           C
ATOM   4342  O   HIS A 569     143.180  19.750  36.820  1.00  0.00           O
ATOM   4343  N   PRO A 570     143.830  19.280  34.770  1.00  0.00           N
ATOM   4344  CD  PRO A 570     143.700  18.690  33.440  1.00  0.00           C
ATOM   4345  HD1 PRO A 570     143.020  19.190  32.760  1.00  0.00           H
ATOM   4346  HD2 PRO A 570     143.400  17.650  33.490  1.00  0.00           H
ATOM   4347  CG  PRO A 570     145.080  18.720  32.830  1.00  0.00           C
ATOM   4348  HG1 PRO A 570     144.920  19.090  31.820  1.00  0.00           H
ATOM   4349  HG2 PRO A 570     145.530  17.740  32.690  1.00  0.00           H
ATOM   4350  CB  PRO A 570     145.840  19.730  33.670  1.00  0.00           C
ATOM   4351  HB1 PRO A 570     145.810  20.720  33.200  1.00  0.00           H
ATOM   4352  HB2 PRO A 570     146.890  19.480  33.820  1.00  0.00           H
ATOM   4353  CA  PRO A 570     145.180  19.790  35.060  1.00  0.00           C
ATOM   4354  HA  PRO A 570     145.660  19.010  35.650  1.00  0.00           H
ATOM   4355  C   PRO A 570     145.390  21.130  35.740  1.00  0.00           C
ATOM   4356  O   PRO A 570     146.400  21.290  36.380  1.00  0.00           O
ATOM   4357  N   PHE A 571     144.450  22.070  35.730  1.00  0.00           N
ATOM   4358  H   PHE A 571     143.690  22.050  35.070  1.00  0.00           H
ATOM   4359  CA  PHE A 571     144.480  23.340  36.520  1.00  0.00           C
ATOM   4360  HA  PHE A 571     145.510  23.700  36.540  1.00  0.00           H
ATOM   4361  CB  PHE A 571     143.510  24.420  35.860  1.00  0.00           C
ATOM   4362  HB1 PHE A 571     142.490  24.080  35.990  1.00  0.00           H
ATOM   4363  HB2 PHE A 571     143.640  24.420  34.780  1.00  0.00           H
ATOM   4364  CG  PHE A 571     143.760  25.870  36.330  1.00  0.00           C
ATOM   4365  CD1 PHE A 571     144.960  26.540  35.980  1.00  0.00           C
ATOM   4366  HD1 PHE A 571     145.720  26.100  35.360  1.00  0.00           H
ATOM   4367  CE1 PHE A 571     145.240  27.870  36.370  1.00  0.00           C
ATOM   4368  HE1 PHE A 571     146.190  28.330  36.160  1.00  0.00           H
ATOM   4369  CZ  PHE A 571     144.260  28.580  37.100  1.00  0.00           C
ATOM   4370  HZ  PHE A 571     144.430  29.630  37.320  1.00  0.00           H
ATOM   4371  CE2 PHE A 571     143.020  27.940  37.490  1.00  0.00           C
ATOM   4372  HE2 PHE A 571     142.260  28.590  37.890  1.00  0.00           H
ATOM   4373  CD2 PHE A 571     142.810  26.560  37.130  1.00  0.00           C
ATOM   4374  HD2 PHE A 571     141.930  26.090  37.550  1.00  0.00           H
ATOM   4375  C   PHE A 571     144.130  23.150  37.970  1.00  0.00           C
ATOM   4376  O   PHE A 571     144.660  23.920  38.750  1.00  0.00           O
ATOM   4377  N   LEU A 572     143.260  22.250  38.290  1.00  0.00           N
ATOM   4378  H   LEU A 572     142.820  21.650  37.620  1.00  0.00           H
ATOM   4379  CA  LEU A 572     142.980  21.830  39.700  1.00  0.00           C
ATOM   4380  HA  LEU A 572     142.970  22.720  40.330  1.00  0.00           H
ATOM   4381  CB  LEU A 572     141.600  21.280  39.660  1.00  0.00           C
ATOM   4382  HB1 LEU A 572     141.440  20.670  40.550  1.00  0.00           H
ATOM   4383  HB2 LEU A 572     141.360  20.640  38.810  1.00  0.00           H
ATOM   4384  CG  LEU A 572     140.390  22.330  39.790  1.00  0.00           C
ATOM   4385  HG  LEU A 572     139.440  21.790  39.710  1.00  0.00           H
ATOM   4386  CD1 LEU A 572     140.310  23.090  41.170  1.00  0.00           C
ATOM   4387 1HD1 LEU A 572     140.400  22.370  41.990  1.00  0.00           H
ATOM   4388 2HD1 LEU A 572     141.080  23.860  41.210  1.00  0.00           H
ATOM   4389 3HD1 LEU A 572     139.360  23.600  41.250  1.00  0.00           H
ATOM   4390  CD2 LEU A 572     140.320  23.350  38.680  1.00  0.00           C
ATOM   4391 1HD2 LEU A 572     139.470  24.010  38.830  1.00  0.00           H
ATOM   4392 2HD2 LEU A 572     141.180  24.010  38.750  1.00  0.00           H
ATOM   4393 3HD2 LEU A 572     140.270  22.690  37.810  1.00  0.00           H
ATOM   4394  C   LEU A 572     143.980  20.830  40.280  1.00  0.00           C
ATOM   4395  O   LEU A 572     144.290  20.800  41.500  1.00  0.00           O
ATOM   4396  N   ALA A 573     144.640  19.980  39.430  1.00  0.00           N
ATOM   4397  H   ALA A 573     144.250  20.090  38.500  1.00  0.00           H
ATOM   4398  CA  ALA A 573     145.640  18.930  39.730  1.00  0.00           C
ATOM   4399  HA  ALA A 573     145.230  18.190  40.430  1.00  0.00           H
ATOM   4400  CB  ALA A 573     145.960  18.170  38.510  1.00  0.00           C
ATOM   4401  HB1 ALA A 573     146.430  18.770  37.740  1.00  0.00           H
ATOM   4402  HB2 ALA A 573     146.560  17.280  38.720  1.00  0.00           H
ATOM   4403  HB3 ALA A 573     145.020  17.810  38.080  1.00  0.00           H
ATOM   4404  C   ALA A 573     146.890  19.560  40.320  1.00  0.00           C
ATOM   4405  O   ALA A 573     147.650  18.830  40.950  1.00  0.00           O
ATOM   4406  N   LYS A 574     147.100  20.920  40.130  1.00  0.00           N
ATOM   4407  H   LYS A 574     146.360  21.390  39.630  1.00  0.00           H
ATOM   4408  CA  LYS A 574     148.160  21.710  40.780  1.00  0.00           C
ATOM   4409  HA  LYS A 574     148.800  21.030  41.320  1.00  0.00           H
ATOM   4410  CB  LYS A 574     149.070  22.270  39.680  1.00  0.00           C
ATOM   4411  HB1 LYS A 574     149.230  21.420  39.010  1.00  0.00           H
ATOM   4412  HB2 LYS A 574     149.980  22.590  40.200  1.00  0.00           H
ATOM   4413  CG  LYS A 574     148.490  23.350  38.790  1.00  0.00           C
ATOM   4414  HG1 LYS A 574     148.320  24.280  39.330  1.00  0.00           H
ATOM   4415  HG2 LYS A 574     147.560  22.920  38.410  1.00  0.00           H
ATOM   4416  CD  LYS A 574     149.390  23.620  37.610  1.00  0.00           C
ATOM   4417  HD1 LYS A 574     149.570  22.670  37.090  1.00  0.00           H
ATOM   4418  HD2 LYS A 574     150.370  24.040  37.850  1.00  0.00           H
ATOM   4419  CE  LYS A 574     148.800  24.590  36.600  1.00  0.00           C
ATOM   4420  HE1 LYS A 574     147.790  24.200  36.440  1.00  0.00           H
ATOM   4421  HE2 LYS A 574     149.230  24.540  35.600  1.00  0.00           H
ATOM   4422  NZ  LYS A 574     148.740  26.000  36.900  1.00  0.00           N
ATOM   4423  HZ1 LYS A 574     149.560  26.360  37.370  1.00  0.00           H
ATOM   4424  HZ2 LYS A 574     148.600  26.540  36.060  1.00  0.00           H
ATOM   4425  HZ3 LYS A 574     147.970  26.130  37.550  1.00  0.00           H
ATOM   4426  C   LYS A 574     147.700  22.860  41.770  1.00  0.00           C
ATOM   4427  O   LYS A 574     148.530  23.700  42.100  1.00  0.00           O
ATOM   4428  N   ALA A 575     146.440  22.980  42.170  1.00  0.00           N
ATOM   4429  H   ALA A 575     145.780  22.240  41.990  1.00  0.00           H
ATOM   4430  CA  ALA A 575     146.040  24.080  43.010  1.00  0.00           C
ATOM   4431  HA  ALA A 575     146.230  24.980  42.430  1.00  0.00           H
ATOM   4432  CB  ALA A 575     144.590  23.900  43.120  1.00  0.00           C
ATOM   4433  HB1 ALA A 575     144.080  24.740  43.580  1.00  0.00           H
ATOM   4434  HB2 ALA A 575     144.130  23.830  42.140  1.00  0.00           H
ATOM   4435  HB3 ALA A 575     144.390  23.080  43.810  1.00  0.00           H
ATOM   4436  C   ALA A 575     146.640  24.140  44.430  1.00  0.00           C
ATOM   4437  O   ALA A 575     146.910  23.050  44.990  1.00  0.00           O
ATOM   4438  N   GLY A 576     146.870  25.330  44.970  1.00  0.00           N
ATOM   4439  H   GLY A 576     146.590  26.110  44.390  1.00  0.00           H
ATOM   4440  CA  GLY A 576     147.460  25.530  46.330  1.00  0.00           C
ATOM   4441  HA1 GLY A 576     147.880  26.530  46.390  1.00  0.00           H
ATOM   4442  HA2 GLY A 576     148.280  24.840  46.500  1.00  0.00           H
ATOM   4443  C   GLY A 576     146.380  25.330  47.450  1.00  0.00           C
ATOM   4444  O   GLY A 576     145.200  25.280  47.100  1.00  0.00           O
ATOM   4445  N   PRO A 577     146.780  25.410  48.680  1.00  0.00           N
ATOM   4446  CD  PRO A 577     148.210  25.380  49.080  1.00  0.00           C
ATOM   4447  HD1 PRO A 577     148.800  26.240  48.760  1.00  0.00           H
ATOM   4448  HD2 PRO A 577     148.680  24.500  48.630  1.00  0.00           H
ATOM   4449  CG  PRO A 577     148.130  25.280  50.580  1.00  0.00           C
ATOM   4450  HG1 PRO A 577     148.190  26.220  51.130  1.00  0.00           H
ATOM   4451  HG2 PRO A 577     148.950  24.640  50.900  1.00  0.00           H
ATOM   4452  CB  PRO A 577     146.740  24.670  50.790  1.00  0.00           C
ATOM   4453  HB1 PRO A 577     146.540  24.810  51.850  1.00  0.00           H
ATOM   4454  HB2 PRO A 577     146.860  23.610  50.560  1.00  0.00           H
ATOM   4455  CA  PRO A 577     145.860  25.460  49.800  1.00  0.00           C
ATOM   4456  HA  PRO A 577     145.000  24.840  49.570  1.00  0.00           H
ATOM   4457  C   PRO A 577     145.490  26.900  50.250  1.00  0.00           C
ATOM   4458  O   PRO A 577     146.280  27.770  49.940  1.00  0.00           O
ATOM   4459  N   PRO A 578     144.430  27.130  51.040  1.00  0.00           N
ATOM   4460  CD  PRO A 578     143.630  26.070  51.620  1.00  0.00           C
ATOM   4461  HD1 PRO A 578     144.220  25.350  52.200  1.00  0.00           H
ATOM   4462  HD2 PRO A 578     142.950  25.560  50.930  1.00  0.00           H
ATOM   4463  CG  PRO A 578     142.830  26.790  52.680  1.00  0.00           C
ATOM   4464  HG1 PRO A 578     143.290  26.790  53.670  1.00  0.00           H
ATOM   4465  HG2 PRO A 578     141.890  26.280  52.880  1.00  0.00           H
ATOM   4466  CB  PRO A 578     142.700  28.270  52.280  1.00  0.00           C
ATOM   4467  HB1 PRO A 578     142.710  28.950  53.120  1.00  0.00           H
ATOM   4468  HB2 PRO A 578     141.820  28.390  51.650  1.00  0.00           H
ATOM   4469  CA  PRO A 578     143.990  28.490  51.400  1.00  0.00           C
ATOM   4470  HA  PRO A 578     143.620  28.930  50.480  1.00  0.00           H
ATOM   4471  C   PRO A 578     145.100  29.340  52.120  1.00  0.00           C
ATOM   4472  O   PRO A 578     145.200  30.560  51.800  1.00  0.00           O
ATOM   4473  N   ALA A 579     145.980  28.750  52.950  1.00  0.00           N
ATOM   4474  H   ALA A 579     145.880  27.800  53.280  1.00  0.00           H
ATOM   4475  CA  ALA A 579     147.090  29.460  53.560  1.00  0.00           C
ATOM   4476  HA  ALA A 579     146.660  30.150  54.280  1.00  0.00           H
ATOM   4477  CB  ALA A 579     148.030  28.340  54.170  1.00  0.00           C
ATOM   4478  HB1 ALA A 579     149.050  28.650  54.410  1.00  0.00           H
ATOM   4479  HB2 ALA A 579     147.550  28.000  55.080  1.00  0.00           H
ATOM   4480  HB3 ALA A 579     148.090  27.500  53.470  1.00  0.00           H
ATOM   4481  C   ALA A 579     148.010  30.310  52.600  1.00  0.00           C
ATOM   4482  O   ALA A 579     148.580  31.310  53.010  1.00  0.00           O
ATOM   4483  N   SER A 580     148.080  29.880  51.360  1.00  0.00           N
ATOM   4484  H   SER A 580     147.640  29.000  51.160  1.00  0.00           H
ATOM   4485  CA  SER A 580     148.820  30.430  50.240  1.00  0.00           C
ATOM   4486  HA  SER A 580     149.760  30.810  50.650  1.00  0.00           H
ATOM   4487  CB  SER A 580     149.260  29.340  49.270  1.00  0.00           C
ATOM   4488  HB1 SER A 580     149.720  28.570  49.880  1.00  0.00           H
ATOM   4489  HB2 SER A 580     149.980  29.790  48.590  1.00  0.00           H
ATOM   4490  OG  SER A 580     148.220  28.830  48.440  1.00  0.00           O
ATOM   4491  HG  SER A 580     147.570  28.380  48.990  1.00  0.00           H
ATOM   4492  C   SER A 580     148.080  31.510  49.520  1.00  0.00           C
ATOM   4493  O   SER A 580     148.750  32.190  48.730  1.00  0.00           O
ATOM   4494  N   ILE A 581     146.750  31.690  49.710  1.00  0.00           N
ATOM   4495  H   ILE A 581     146.210  31.040  50.270  1.00  0.00           H
ATOM   4496  CA  ILE A 581     146.050  32.940  49.310  1.00  0.00           C
ATOM   4497  HA  ILE A 581     146.430  33.160  48.310  1.00  0.00           H
ATOM   4498  CB  ILE A 581     144.520  32.800  49.270  1.00  0.00           C
ATOM   4499  HB  ILE A 581     144.180  32.640  50.290  1.00  0.00           H
ATOM   4500  CG2 ILE A 581     143.770  34.140  48.880  1.00  0.00           C
ATOM   4501 1HG2 ILE A 581     144.180  34.950  49.480  1.00  0.00           H
ATOM   4502 2HG2 ILE A 581     143.930  34.380  47.840  1.00  0.00           H
ATOM   4503 3HG2 ILE A 581     142.720  34.060  49.170  1.00  0.00           H
ATOM   4504  CG1 ILE A 581     143.880  31.720  48.440  1.00  0.00           C
ATOM   4505 1HG1 ILE A 581     144.240  30.810  48.900  1.00  0.00           H
ATOM   4506 2HG1 ILE A 581     144.330  31.730  47.450  1.00  0.00           H
ATOM   4507  CD  ILE A 581     142.370  31.680  48.260  1.00  0.00           C
ATOM   4508  HD1 ILE A 581     142.020  30.740  47.830  1.00  0.00           H
ATOM   4509  HD2 ILE A 581     141.900  31.890  49.220  1.00  0.00           H
ATOM   4510  HD3 ILE A 581     142.020  32.500  47.630  1.00  0.00           H
ATOM   4511  C   ILE A 581     146.390  34.120  50.260  1.00  0.00           C
ATOM   4512  O   ILE A 581     146.540  35.280  49.800  1.00  0.00           O
ATOM   4513  N   VAL A 582     146.620  33.930  51.580  1.00  0.00           N
ATOM   4514  H   VAL A 582     146.430  33.000  51.920  1.00  0.00           H
ATOM   4515  CA  VAL A 582     146.860  34.940  52.620  1.00  0.00           C
ATOM   4516  HA  VAL A 582     145.890  35.410  52.810  1.00  0.00           H
ATOM   4517  CB  VAL A 582     147.230  34.180  53.930  1.00  0.00           C
ATOM   4518  HB  VAL A 582     148.190  33.660  53.960  1.00  0.00           H
ATOM   4519  CG1 VAL A 582     147.460  35.080  55.150  1.00  0.00           C
ATOM   4520 1HG1 VAL A 582     146.460  35.480  55.340  1.00  0.00           H
ATOM   4521 2HG1 VAL A 582     147.900  34.550  55.990  1.00  0.00           H
ATOM   4522 3HG1 VAL A 582     148.070  35.910  54.790  1.00  0.00           H
ATOM   4523  CG2 VAL A 582     146.240  33.100  54.360  1.00  0.00           C
ATOM   4524 1HG2 VAL A 582     146.190  32.220  53.720  1.00  0.00           H
ATOM   4525 2HG2 VAL A 582     146.500  32.800  55.370  1.00  0.00           H
ATOM   4526 3HG2 VAL A 582     145.230  33.500  54.490  1.00  0.00           H
ATOM   4527  C   VAL A 582     147.930  35.970  52.210  1.00  0.00           C
ATOM   4528  O   VAL A 582     147.580  37.150  52.310  1.00  0.00           O
ATOM   4529  N   PRO A 583     149.140  35.590  51.750  1.00  0.00           N
ATOM   4530  CD  PRO A 583     149.700  34.290  51.790  1.00  0.00           C
ATOM   4531  HD1 PRO A 583     149.010  33.510  51.460  1.00  0.00           H
ATOM   4532  HD2 PRO A 583     149.990  34.000  52.800  1.00  0.00           H
ATOM   4533  CG  PRO A 583     150.950  34.440  50.950  1.00  0.00           C
ATOM   4534  HG1 PRO A 583     150.840  34.340  49.870  1.00  0.00           H
ATOM   4535  HG2 PRO A 583     151.660  33.720  51.370  1.00  0.00           H
ATOM   4536  CB  PRO A 583     151.480  35.830  51.260  1.00  0.00           C
ATOM   4537  HB1 PRO A 583     152.060  36.300  50.470  1.00  0.00           H
ATOM   4538  HB2 PRO A 583     152.000  35.830  52.210  1.00  0.00           H
ATOM   4539  CA  PRO A 583     150.130  36.570  51.470  1.00  0.00           C
ATOM   4540  HA  PRO A 583     150.270  37.310  52.260  1.00  0.00           H
ATOM   4541  C   PRO A 583     149.790  37.290  50.140  1.00  0.00           C
ATOM   4542  O   PRO A 583     150.080  38.460  49.950  1.00  0.00           O
ATOM   4543  N   LEU A 584     149.050  36.680  49.200  1.00  0.00           N
ATOM   4544  H   LEU A 584     148.620  35.800  49.440  1.00  0.00           H
ATOM   4545  CA  LEU A 584     148.540  37.350  47.990  1.00  0.00           C
ATOM   4546  HA  LEU A 584     149.370  37.930  47.590  1.00  0.00           H
ATOM   4547  CB  LEU A 584     148.110  36.370  46.800  1.00  0.00           C
ATOM   4548  HB1 LEU A 584     147.730  36.960  45.960  1.00  0.00           H
ATOM   4549  HB2 LEU A 584     147.300  35.710  47.080  1.00  0.00           H
ATOM   4550  CG  LEU A 584     149.190  35.440  46.360  1.00  0.00           C
ATOM   4551  HG  LEU A 584     149.300  34.660  47.110  1.00  0.00           H
ATOM   4552  CD1 LEU A 584     148.630  34.710  45.110  1.00  0.00           C
ATOM   4553 1HD1 LEU A 584     147.640  34.280  45.280  1.00  0.00           H
ATOM   4554 2HD1 LEU A 584     148.730  35.330  44.220  1.00  0.00           H
ATOM   4555 3HD1 LEU A 584     149.190  33.780  45.020  1.00  0.00           H
ATOM   4556  CD2 LEU A 584     150.530  36.060  46.010  1.00  0.00           C
ATOM   4557 1HD2 LEU A 584     150.350  36.870  45.300  1.00  0.00           H
ATOM   4558 2HD2 LEU A 584     150.940  36.570  46.880  1.00  0.00           H
ATOM   4559 3HD2 LEU A 584     151.190  35.260  45.650  1.00  0.00           H
ATOM   4560  C   LEU A 584     147.440  38.440  48.320  1.00  0.00           C
ATOM   4561  O   LEU A 584     147.260  39.280  47.460  1.00  0.00           O
ATOM   4562  N   MET A 585     146.970  38.490  49.620  1.00  0.00           N
ATOM   4563  H   MET A 585     147.220  37.740  50.250  1.00  0.00           H
ATOM   4564  CA  MET A 585     146.030  39.550  50.060  1.00  0.00           C
ATOM   4565  HA  MET A 585     145.470  39.940  49.220  1.00  0.00           H
ATOM   4566  CB  MET A 585     145.070  38.950  51.070  1.00  0.00           C
ATOM   4567  HB1 MET A 585     144.340  39.720  51.320  1.00  0.00           H
ATOM   4568  HB2 MET A 585     145.590  38.740  52.000  1.00  0.00           H
ATOM   4569  CG  MET A 585     144.280  37.770  50.570  1.00  0.00           C
ATOM   4570  HG1 MET A 585     144.960  36.970  50.280  1.00  0.00           H
ATOM   4571  HG2 MET A 585     143.750  38.130  49.680  1.00  0.00           H
ATOM   4572  SD  MET A 585     143.210  36.900  51.660  1.00  0.00           S
ATOM   4573  CE  MET A 585     142.070  38.250  52.140  1.00  0.00           C
ATOM   4574  HE1 MET A 585     141.260  37.860  52.760  1.00  0.00           H
ATOM   4575  HE2 MET A 585     142.530  39.130  52.590  1.00  0.00           H
ATOM   4576  HE3 MET A 585     141.610  38.520  51.180  1.00  0.00           H
ATOM   4577  C   MET A 585     146.940  40.680  50.650  1.00  0.00           C
ATOM   4578  O   MET A 585     146.520  41.640  51.300  1.00  0.00           O
ATOM   4579  N   ARG A 586     148.280  40.560  50.590  1.00  0.00           N
ATOM   4580  H   ARG A 586     148.610  39.680  50.230  1.00  0.00           H
ATOM   4581  CA  ARG A 586     149.320  41.560  50.940  1.00  0.00           C
ATOM   4582  HA  ARG A 586     148.880  42.460  51.380  1.00  0.00           H
ATOM   4583  CB  ARG A 586     150.320  41.120  52.080  1.00  0.00           C
ATOM   4584  HB1 ARG A 586     150.970  40.310  51.760  1.00  0.00           H
ATOM   4585  HB2 ARG A 586     149.840  40.830  53.010  1.00  0.00           H
ATOM   4586  CG  ARG A 586     151.260  42.260  52.390  1.00  0.00           C
ATOM   4587  HG1 ARG A 586     150.680  43.170  52.530  1.00  0.00           H
ATOM   4588  HG2 ARG A 586     151.840  42.530  51.500  1.00  0.00           H
ATOM   4589  CD  ARG A 586     152.190  42.120  53.590  1.00  0.00           C
ATOM   4590  HD1 ARG A 586     152.830  43.000  53.650  1.00  0.00           H
ATOM   4591  HD2 ARG A 586     152.800  41.230  53.460  1.00  0.00           H
ATOM   4592  NE  ARG A 586     151.460  42.020  54.840  1.00  0.00           N
ATOM   4593  HE  ARG A 586     150.720  42.700  54.970  1.00  0.00           H
ATOM   4594  CZ  ARG A 586     151.810  41.310  55.880  1.00  0.00           C
ATOM   4595  NH1 ARG A 586     152.660  40.310  55.750  1.00  0.00           N
ATOM   4596 1HH1 ARG A 586     152.960  40.120  54.800  1.00  0.00           H
ATOM   4597 2HH1 ARG A 586     152.950  39.720  56.510  1.00  0.00           H
ATOM   4598  NH2 ARG A 586     151.370  41.480  57.080  1.00  0.00           N
ATOM   4599 1HH2 ARG A 586     150.600  42.120  57.190  1.00  0.00           H
ATOM   4600 2HH2 ARG A 586     151.560  40.790  57.800  1.00  0.00           H
ATOM   4601  C   ARG A 586     150.040  42.050  49.650  1.00  0.00           C
ATOM   4602  O   ARG A 586     150.300  43.210  49.500  1.00  0.00           O
ATOM   4603  N   GLN A 587     150.440  41.050  48.810  1.00  0.00           N
ATOM   4604  H   GLN A 587     150.270  40.090  49.090  1.00  0.00           H
ATOM   4605  CA  GLN A 587     151.310  41.240  47.610  1.00  0.00           C
ATOM   4606  HA  GLN A 587     151.980  42.080  47.780  1.00  0.00           H
ATOM   4607  CB  GLN A 587     151.990  39.920  47.180  1.00  0.00           C
ATOM   4608  HB1 GLN A 587     152.610  40.010  46.290  1.00  0.00           H
ATOM   4609  HB2 GLN A 587     151.200  39.190  47.000  1.00  0.00           H
ATOM   4610  CG  GLN A 587     152.980  39.450  48.280  1.00  0.00           C
ATOM   4611  HG1 GLN A 587     152.480  39.260  49.230  1.00  0.00           H
ATOM   4612  HG2 GLN A 587     153.640  40.290  48.490  1.00  0.00           H
ATOM   4613  CD  GLN A 587     153.770  38.200  47.800  1.00  0.00           C
ATOM   4614  OE1 GLN A 587     153.450  37.110  48.260  1.00  0.00           O
ATOM   4615  NE2 GLN A 587     154.750  38.280  46.960  1.00  0.00           N
ATOM   4616 1HE2 GLN A 587     155.070  39.160  46.590  1.00  0.00           H
ATOM   4617 2HE2 GLN A 587     155.090  37.430  46.520  1.00  0.00           H
ATOM   4618  C   GLN A 587     150.490  41.810  46.420  1.00  0.00           C
ATOM   4619  O   GLN A 587     149.250  41.700  46.390  1.00  0.00           O
ATOM   4620  N   ASN A 588     151.240  42.490  45.500  1.00  0.00           N
ATOM   4621  H   ASN A 588     152.240  42.380  45.570  1.00  0.00           H
ATOM   4622  CA  ASN A 588     150.740  43.070  44.290  1.00  0.00           C
ATOM   4623  HA  ASN A 588     149.650  43.060  44.290  1.00  0.00           H
ATOM   4624  CB  ASN A 588     151.120  44.510  44.400  1.00  0.00           C
ATOM   4625  HB1 ASN A 588     152.210  44.570  44.500  1.00  0.00           H
ATOM   4626  HB2 ASN A 588     150.880  44.950  45.370  1.00  0.00           H
ATOM   4627  CG  ASN A 588     150.770  45.330  43.230  1.00  0.00           C
ATOM   4628  OD1 ASN A 588     149.730  45.140  42.600  1.00  0.00           O
ATOM   4629  ND2 ASN A 588     151.670  46.210  42.830  1.00  0.00           N
ATOM   4630 1HD2 ASN A 588     152.490  46.440  43.380  1.00  0.00           H
ATOM   4631 2HD2 ASN A 588     151.550  46.720  41.980  1.00  0.00           H
ATOM   4632  C   ASN A 588     151.400  42.330  43.020  1.00  0.00           C
ATOM   4633  O   ASN A 588     152.500  41.790  43.130  1.00  0.00           O
ATOM   4634  N   ARG A 589     150.720  42.310  41.870  1.00  0.00           N
ATOM   4635  H   ARG A 589     149.780  42.690  41.900  1.00  0.00           H
ATOM   4636  CA  ARG A 589     151.270  42.240  40.490  1.00  0.00           C
ATOM   4637  HA  ARG A 589     152.290  42.620  40.590  1.00  0.00           H
ATOM   4638  CB  ARG A 589     151.200  40.800  40.010  1.00  0.00           C
ATOM   4639  HB1 ARG A 589     150.170  40.590  39.730  1.00  0.00           H
ATOM   4640  HB2 ARG A 589     151.630  40.150  40.780  1.00  0.00           H
ATOM   4641  CG  ARG A 589     152.180  40.510  38.820  1.00  0.00           C
ATOM   4642  HG1 ARG A 589     152.140  41.320  38.090  1.00  0.00           H
ATOM   4643  HG2 ARG A 589     151.860  39.560  38.390  1.00  0.00           H
ATOM   4644  CD  ARG A 589     153.680  40.420  39.300  1.00  0.00           C
ATOM   4645  HD1 ARG A 589     153.780  39.470  39.830  1.00  0.00           H
ATOM   4646  HD2 ARG A 589     153.860  41.260  39.980  1.00  0.00           H
ATOM   4647  NE  ARG A 589     154.570  40.600  38.200  1.00  0.00           N
ATOM   4648  HE  ARG A 589     154.860  41.560  38.010  1.00  0.00           H
ATOM   4649  CZ  ARG A 589     155.170  39.640  37.610  1.00  0.00           C
ATOM   4650  NH1 ARG A 589     156.050  39.850  36.750  1.00  0.00           N
ATOM   4651 1HH1 ARG A 589     156.300  40.800  36.510  1.00  0.00           H
ATOM   4652 2HH1 ARG A 589     156.450  39.080  36.220  1.00  0.00           H
ATOM   4653  NH2 ARG A 589     154.740  38.400  37.740  1.00  0.00           N
ATOM   4654 1HH2 ARG A 589     153.920  38.120  38.270  1.00  0.00           H
ATOM   4655 2HH2 ARG A 589     155.170  37.680  37.170  1.00  0.00           H
ATOM   4656  C   ARG A 589     150.500  43.180  39.590  1.00  0.00           C
ATOM   4657  O   ARG A 589     149.290  43.390  39.660  1.00  0.00           O
ATOM   4658  N   THR A 590     151.310  43.660  38.640  1.00  0.00           N
ATOM   4659  H   THR A 590     152.280  43.470  38.850  1.00  0.00           H
ATOM   4660  CA  THR A 590     150.910  44.510  37.460  1.00  0.00           C
ATOM   4661  HA  THR A 590     150.530  45.470  37.830  1.00  0.00           H
ATOM   4662  CB  THR A 590     152.090  44.940  36.450  1.00  0.00           C
ATOM   4663  HB  THR A 590     151.790  45.430  35.520  1.00  0.00           H
ATOM   4664  CG2 THR A 590     153.050  45.960  37.080  1.00  0.00           C
ATOM   4665 1HG2 THR A 590     154.010  45.940  36.560  1.00  0.00           H
ATOM   4666 2HG2 THR A 590     152.690  46.980  36.930  1.00  0.00           H
ATOM   4667 3HG2 THR A 590     153.200  45.760  38.140  1.00  0.00           H
ATOM   4668  OG1 THR A 590     152.780  43.760  36.010  1.00  0.00           O
ATOM   4669  HG1 THR A 590     153.490  43.600  36.630  1.00  0.00           H
ATOM   4670  C   THR A 590     149.820  43.750  36.680  1.00  0.00           C
ATOM   4671  O   THR A 590     149.740  42.520  36.540  1.00  0.00           O
ATOM   4672  N   ARG A 591     148.950  44.490  35.930  1.00  0.00           N
ATOM   4673  H   ARG A 591     149.040  45.500  35.880  1.00  0.00           H
ATOM   4674  CA  ARG A 591     147.760  43.940  35.280  1.00  0.00           C
ATOM   4675  HA  ARG A 591     147.450  43.040  35.810  1.00  0.00           H
ATOM   4676  CB  ARG A 591     146.650  44.950  35.250  1.00  0.00           C
ATOM   4677  HB1 ARG A 591     146.980  45.930  34.880  1.00  0.00           H
ATOM   4678  HB2 ARG A 591     146.410  45.070  36.300  1.00  0.00           H
ATOM   4679  CG  ARG A 591     145.460  44.580  34.360  1.00  0.00           C
ATOM   4680  HG1 ARG A 591     145.840  44.470  33.350  1.00  0.00           H
ATOM   4681  HG2 ARG A 591     144.750  45.400  34.480  1.00  0.00           H
ATOM   4682  CD  ARG A 591     144.790  43.270  34.800  1.00  0.00           C
ATOM   4683  HD1 ARG A 591     145.580  42.530  34.910  1.00  0.00           H
ATOM   4684  HD2 ARG A 591     144.100  42.950  34.020  1.00  0.00           H
ATOM   4685  NE  ARG A 591     143.930  43.530  36.010  1.00  0.00           N
ATOM   4686  HE  ARG A 591     143.850  44.480  36.340  1.00  0.00           H
ATOM   4687  CZ  ARG A 591     143.400  42.660  36.840  1.00  0.00           C
ATOM   4688  NH1 ARG A 591     143.460  41.320  36.660  1.00  0.00           N
ATOM   4689 1HH1 ARG A 591     143.930  40.980  35.830  1.00  0.00           H
ATOM   4690 2HH1 ARG A 591     142.950  40.760  37.320  1.00  0.00           H
ATOM   4691  NH2 ARG A 591     142.940  43.070  38.000  1.00  0.00           N
ATOM   4692 1HH2 ARG A 591     143.000  44.050  38.220  1.00  0.00           H
ATOM   4693 2HH2 ARG A 591     142.580  42.350  38.620  1.00  0.00           H
ATOM   4694  C   ARG A 591     148.240  43.340  33.930  1.00  0.00           C
ATOM   4695  OC1 ARG A 591     148.810  44.020  33.050  1.00  0.00           O
ATOM   4696  OC2 ARG A 591     147.800  42.190  33.730  1.00  0.00           O
ATOM   4697  N    5e B 592     130.310  44.430  50.470  1.00  0.00            
ATOM   4698  HN   5e B 592     130.290  44.060  49.520  1.00  0.00            
ATOM   4699  C    5e B 592     130.530  42.100  52.090  1.00  0.00            
ATOM   4700  HC   5e B 592     130.600  41.010  51.990  1.00  0.00            
ATOM   4701  C1   5e B 592     131.690  42.580  51.200  1.00  0.00            
ATOM   4702  HC1  5e B 592     132.660  42.300  51.630  1.00  0.00            
ATOM   4703  HC2  5e B 592     131.620  42.170  50.190  1.00  0.00            
ATOM   4704  C2   5e B 592     129.220  42.530  51.420  1.00  0.00            
ATOM   4705  H8   5e B 592     129.080  42.040  50.450  1.00  0.00            
ATOM   4706  H11  5e B 592     128.380  42.180  52.040  1.00  0.00            
ATOM   4707  C3   5e B 592     131.580  44.120  51.100  1.00  0.00            
ATOM   4708  H9   5e B 592     132.370  44.540  50.460  1.00  0.00            
ATOM   4709  H12  5e B 592     131.580  44.590  52.090  1.00  0.00            
ATOM   4710  C4   5e B 592     129.180  44.060  51.220  1.00  0.00            
ATOM   4711  H10  5e B 592     129.190  44.490  52.230  1.00  0.00            
ATOM   4712  H13  5e B 592     128.290  44.280  50.620  1.00  0.00            
ATOM   4713  N1   5e B 592     130.650  42.510  53.480  1.00  0.00            
ATOM   4714  H    5e B 592     131.220  43.340  53.650  1.00  0.00            
ATOM   4715  C5   5e B 592     131.000  41.700  54.540  1.00  0.00            
ATOM   4716  N2   5e B 592     132.210  42.000  55.030  1.00  0.00            
ATOM   4717  C6   5e B 592     132.670  41.190  55.940  1.00  0.00            
ATOM   4718  N3   5e B 592     132.250  39.970  56.260  1.00  0.00            
ATOM   4719  C7   5e B 592     131.100  39.630  55.660  1.00  0.00            
ATOM   4720  N4   5e B 592     130.300  38.480  55.790  1.00  0.00            
ATOM   4721  C8   5e B 592     130.420  40.500  54.870  1.00  0.00            
ATOM   4722  C9   5e B 592     129.150  38.560  55.010  1.00  0.00            
ATOM   4723  H1   5e B 592     128.410  37.780  54.910  1.00  0.00            
ATOM   4724  H14  5e B 592     130.540  37.710  56.400  1.00  0.00            
ATOM   4725  C10  5e B 592     129.180  39.880  54.420  1.00  0.00            
ATOM   4726  H2   5e B 592     128.340  40.290  53.890  1.00  0.00            
ATOM   4727  N5   5e B 592     133.760  41.650  56.540  1.00  0.00            
ATOM   4728  H15  5e B 592     134.380  40.850  56.640  1.00  0.00            
ATOM   4729  C11  5e B 592     134.250  42.890  56.780  1.00  0.00            
ATOM   4730  C12  5e B 592     135.660  42.910  57.060  1.00  0.00            
ATOM   4731  H3   5e B 592     136.330  42.080  56.840  1.00  0.00            
ATOM   4732  C13  5e B 592     136.240  44.110  57.480  1.00  0.00            
ATOM   4733  H4   5e B 592     137.310  44.060  57.690  1.00  0.00            
ATOM   4734  C14  5e B 592     135.470  45.330  57.660  1.00  0.00            
ATOM   4735  H5   5e B 592     135.920  46.260  58.010  1.00  0.00            
ATOM   4736  C15  5e B 592     134.110  45.230  57.440  1.00  0.00            
ATOM   4737  H6   5e B 592     133.490  46.080  57.690  1.00  0.00            
ATOM   4738  C16  5e B 592     133.510  44.030  57.000  1.00  0.00            
ATOM   4739  H7   5e B 592     132.450  44.070  56.770  1.00  0.00            
TER
ENDMDL
