# Supplementary material for: The Inhibitory Mechanism of 7H-Pyrrolo[2,3-d]pyrimidine Derivatives as Inhibitors of P21-Activated Kinase 4 through Molecular Dynamics Simulation
Source: Molecules. 2023 Jan 3;28(1):413. doi: 10.3390/molecules28010413 (PMC9823812; doi:10.3390/molecules28010413)
Supplement: Supplementary file 1 [file molecules-28-00413-s001.zip › 5g .pdb]

REMARK    GENERATED BY TRJCONV
TITLE     SERINE/THREONINE-PROTEIN KINASE PAK 4 in water t= 165240.00000 step= 82620000
REMARK    THIS IS A SIMULATION BOX
CRYST1   82.436   82.436   82.436  90.00  90.00  90.00 P 1           1
MODEL        1
ATOM      1  N   SER A 299      48.160  -5.000  53.140  1.00  0.00           N
ATOM      2  H1  SER A 299      47.300  -5.450  53.420  1.00  0.00           H
ATOM      3  H2  SER A 299      48.330  -4.060  53.460  1.00  0.00           H
ATOM      4  H3  SER A 299      48.080  -4.880  52.140  1.00  0.00           H
ATOM      5  CA  SER A 299      49.320  -5.770  53.490  1.00  0.00           C
ATOM      6  HA  SER A 299      49.210  -6.000  54.550  1.00  0.00           H
ATOM      7  CB  SER A 299      49.250  -7.050  52.640  1.00  0.00           C
ATOM      8  HB1 SER A 299      48.390  -7.630  52.980  1.00  0.00           H
ATOM      9  HB2 SER A 299      50.150  -7.660  52.640  1.00  0.00           H
ATOM     10  OG  SER A 299      49.170  -6.740  51.250  1.00  0.00           O
ATOM     11  HG  SER A 299      48.980  -7.540  50.750  1.00  0.00           H
ATOM     12  C   SER A 299      50.640  -5.030  53.100  1.00  0.00           C
ATOM     13  O   SER A 299      50.600  -4.060  52.270  1.00  0.00           O
ATOM     14  N   SER A 300      51.750  -5.290  53.730  1.00  0.00           N
ATOM     15  H   SER A 300      51.780  -5.980  54.470  1.00  0.00           H
ATOM     16  CA  SER A 300      52.960  -4.520  53.630  1.00  0.00           C
ATOM     17  HA  SER A 300      52.740  -3.740  52.900  1.00  0.00           H
ATOM     18  CB  SER A 300      53.160  -3.770  55.030  1.00  0.00           C
ATOM     19  HB1 SER A 300      54.150  -3.330  55.130  1.00  0.00           H
ATOM     20  HB2 SER A 300      53.220  -4.510  55.830  1.00  0.00           H
ATOM     21  OG  SER A 300      52.160  -2.800  55.320  1.00  0.00           O
ATOM     22  HG  SER A 300      51.420  -3.300  55.670  1.00  0.00           H
ATOM     23  C   SER A 300      54.170  -5.280  53.300  1.00  0.00           C
ATOM     24  O   SER A 300      55.180  -4.770  52.830  1.00  0.00           O
ATOM     25  N   HIS A 301      54.170  -6.610  53.620  1.00  0.00           N
ATOM     26  H   HIS A 301      53.290  -7.040  53.850  1.00  0.00           H
ATOM     27  CA  HIS A 301      55.220  -7.540  53.440  1.00  0.00           C
ATOM     28  HA  HIS A 301      56.060  -7.310  54.100  1.00  0.00           H
ATOM     29  CB  HIS A 301      54.830  -8.960  53.780  1.00  0.00           C
ATOM     30  HB1 HIS A 301      54.410  -8.950  54.780  1.00  0.00           H
ATOM     31  HB2 HIS A 301      55.780  -9.480  53.840  1.00  0.00           H
ATOM     32  CG  HIS A 301      53.850  -9.620  52.820  1.00  0.00           C
ATOM     33  ND1 HIS A 301      52.590  -9.080  52.390  1.00  0.00           N
ATOM     34  CE1 HIS A 301      52.200  -9.850  51.330  1.00  0.00           C
ATOM     35  HE1 HIS A 301      51.490  -9.580  50.560  1.00  0.00           H
ATOM     36  NE2 HIS A 301      53.030 -10.890  51.200  1.00  0.00           N
ATOM     37  HE2 HIS A 301      52.880 -11.580  50.480  1.00  0.00           H
ATOM     38  CD2 HIS A 301      54.090 -10.740  52.080  1.00  0.00           C
ATOM     39  HD2 HIS A 301      54.940 -11.410  52.150  1.00  0.00           H
ATOM     40  C   HIS A 301      55.840  -7.540  51.990  1.00  0.00           C
ATOM     41  O   HIS A 301      57.020  -7.750  51.770  1.00  0.00           O
ATOM     42  N   GLU A 302      55.090  -7.250  50.900  1.00  0.00           N
ATOM     43  H   GLU A 302      54.100  -7.150  51.040  1.00  0.00           H
ATOM     44  CA  GLU A 302      55.690  -7.020  49.600  1.00  0.00           C
ATOM     45  HA  GLU A 302      56.030  -7.930  49.120  1.00  0.00           H
ATOM     46  CB  GLU A 302      54.640  -6.420  48.680  1.00  0.00           C
ATOM     47  HB1 GLU A 302      54.490  -5.370  48.930  1.00  0.00           H
ATOM     48  HB2 GLU A 302      53.670  -6.900  48.810  1.00  0.00           H
ATOM     49  CG  GLU A 302      54.850  -6.420  47.200  1.00  0.00           C
ATOM     50  HG1 GLU A 302      55.740  -5.850  46.910  1.00  0.00           H
ATOM     51  HG2 GLU A 302      53.990  -5.910  46.770  1.00  0.00           H
ATOM     52  CD  GLU A 302      54.940  -7.850  46.640  1.00  0.00           C
ATOM     53  OE1 GLU A 302      56.040  -8.350  46.460  1.00  0.00           O
ATOM     54  OE2 GLU A 302      53.960  -8.590  46.460  1.00  0.00           O
ATOM     55  C   GLU A 302      56.920  -5.950  49.670  1.00  0.00           C
ATOM     56  O   GLU A 302      57.850  -6.210  48.910  1.00  0.00           O
ATOM     57  N   GLN A 303      56.930  -4.980  50.610  1.00  0.00           N
ATOM     58  H   GLN A 303      56.150  -4.770  51.210  1.00  0.00           H
ATOM     59  CA  GLN A 303      58.080  -4.070  50.630  1.00  0.00           C
ATOM     60  HA  GLN A 303      58.330  -3.710  49.630  1.00  0.00           H
ATOM     61  CB  GLN A 303      57.660  -2.880  51.510  1.00  0.00           C
ATOM     62  HB1 GLN A 303      58.540  -2.280  51.740  1.00  0.00           H
ATOM     63  HB2 GLN A 303      57.190  -3.220  52.440  1.00  0.00           H
ATOM     64  CG  GLN A 303      56.560  -1.990  50.870  1.00  0.00           C
ATOM     65  HG1 GLN A 303      55.980  -2.310  50.000  1.00  0.00           H
ATOM     66  HG2 GLN A 303      56.970  -1.100  50.390  1.00  0.00           H
ATOM     67  CD  GLN A 303      55.510  -1.550  51.890  1.00  0.00           C
ATOM     68  OE1 GLN A 303      54.310  -1.870  51.670  1.00  0.00           O
ATOM     69  NE2 GLN A 303      55.870  -0.760  52.930  1.00  0.00           N
ATOM     70 1HE2 GLN A 303      56.810  -0.470  53.120  1.00  0.00           H
ATOM     71 2HE2 GLN A 303      55.140  -0.530  53.590  1.00  0.00           H
ATOM     72  C   GLN A 303      59.320  -4.770  51.270  1.00  0.00           C
ATOM     73  O   GLN A 303      60.420  -4.190  51.200  1.00  0.00           O
ATOM     74  N   PHE A 304      59.140  -5.870  52.030  1.00  0.00           N
ATOM     75  H   PHE A 304      58.270  -6.360  51.830  1.00  0.00           H
ATOM     76  CA  PHE A 304      60.070  -6.490  53.010  1.00  0.00           C
ATOM     77  HA  PHE A 304      60.930  -5.900  53.330  1.00  0.00           H
ATOM     78  CB  PHE A 304      59.150  -6.660  54.220  1.00  0.00           C
ATOM     79  HB1 PHE A 304      59.710  -7.200  54.990  1.00  0.00           H
ATOM     80  HB2 PHE A 304      58.360  -7.380  54.020  1.00  0.00           H
ATOM     81  CG  PHE A 304      58.540  -5.460  54.920  1.00  0.00           C
ATOM     82  CD1 PHE A 304      57.510  -5.650  55.860  1.00  0.00           C
ATOM     83  HD1 PHE A 304      57.280  -6.660  56.140  1.00  0.00           H
ATOM     84  CE1 PHE A 304      56.820  -4.560  56.460  1.00  0.00           C
ATOM     85  HE1 PHE A 304      55.910  -4.650  57.040  1.00  0.00           H
ATOM     86  CZ  PHE A 304      57.120  -3.240  56.120  1.00  0.00           C
ATOM     87  HZ  PHE A 304      56.650  -2.380  56.570  1.00  0.00           H
ATOM     88  CE2 PHE A 304      58.200  -3.050  55.200  1.00  0.00           C
ATOM     89  HE2 PHE A 304      58.520  -2.050  54.940  1.00  0.00           H
ATOM     90  CD2 PHE A 304      58.900  -4.090  54.570  1.00  0.00           C
ATOM     91  HD2 PHE A 304      59.700  -3.840  53.890  1.00  0.00           H
ATOM     92  C   PHE A 304      60.700  -7.770  52.610  1.00  0.00           C
ATOM     93  O   PHE A 304      61.390  -8.300  53.480  1.00  0.00           O
ATOM     94  N   ARG A 305      60.370  -8.330  51.490  1.00  0.00           N
ATOM     95  H   ARG A 305      59.640  -7.880  50.960  1.00  0.00           H
ATOM     96  CA  ARG A 305      60.760  -9.700  51.090  1.00  0.00           C
ATOM     97  HA  ARG A 305      60.460 -10.410  51.860  1.00  0.00           H
ATOM     98  CB  ARG A 305      60.040 -10.180  49.790  1.00  0.00           C
ATOM     99  HB1 ARG A 305      60.330 -11.190  49.510  1.00  0.00           H
ATOM    100  HB2 ARG A 305      60.480  -9.570  49.000  1.00  0.00           H
ATOM    101  CG  ARG A 305      58.560 -10.230  49.650  1.00  0.00           C
ATOM    102  HG1 ARG A 305      58.210  -9.200  49.580  1.00  0.00           H
ATOM    103  HG2 ARG A 305      58.050 -10.710  50.480  1.00  0.00           H
ATOM    104  CD  ARG A 305      58.000 -10.770  48.330  1.00  0.00           C
ATOM    105  HD1 ARG A 305      58.140 -11.850  48.280  1.00  0.00           H
ATOM    106  HD2 ARG A 305      58.580 -10.330  47.530  1.00  0.00           H
ATOM    107  NE  ARG A 305      56.630 -10.490  48.060  1.00  0.00           N
ATOM    108  HE  ARG A 305      56.450  -9.610  47.600  1.00  0.00           H
ATOM    109  CZ  ARG A 305      55.580 -11.140  48.490  1.00  0.00           C
ATOM    110  NH1 ARG A 305      54.360 -10.860  48.090  1.00  0.00           N
ATOM    111 1HH1 ARG A 305      54.310 -10.230  47.300  1.00  0.00           H
ATOM    112 2HH1 ARG A 305      53.590 -11.480  48.300  1.00  0.00           H
ATOM    113  NH2 ARG A 305      55.660 -12.180  49.370  1.00  0.00           N
ATOM    114 1HH2 ARG A 305      56.590 -12.560  49.350  1.00  0.00           H
ATOM    115 2HH2 ARG A 305      54.780 -12.660  49.520  1.00  0.00           H
ATOM    116  C   ARG A 305      62.290  -9.810  50.930  1.00  0.00           C
ATOM    117  O   ARG A 305      62.770 -10.840  51.360  1.00  0.00           O
ATOM    118  N   ALA A 306      63.080  -8.780  50.610  1.00  0.00           N
ATOM    119  H   ALA A 306      62.730  -7.890  50.300  1.00  0.00           H
ATOM    120  CA  ALA A 306      64.520  -8.850  50.710  1.00  0.00           C
ATOM    121  HA  ALA A 306      64.910  -9.780  50.300  1.00  0.00           H
ATOM    122  CB  ALA A 306      65.080  -7.780  49.770  1.00  0.00           C
ATOM    123  HB1 ALA A 306      64.830  -6.780  50.130  1.00  0.00           H
ATOM    124  HB2 ALA A 306      66.160  -7.740  49.640  1.00  0.00           H
ATOM    125  HB3 ALA A 306      64.550  -7.930  48.820  1.00  0.00           H
ATOM    126  C   ALA A 306      65.040  -8.610  52.130  1.00  0.00           C
ATOM    127  O   ALA A 306      66.100  -9.190  52.460  1.00  0.00           O
ATOM    128  N   ALA A 307      64.360  -7.830  53.020  1.00  0.00           N
ATOM    129  H   ALA A 307      63.770  -7.080  52.690  1.00  0.00           H
ATOM    130  CA  ALA A 307      64.740  -7.780  54.480  1.00  0.00           C
ATOM    131  HA  ALA A 307      65.780  -7.460  54.540  1.00  0.00           H
ATOM    132  CB  ALA A 307      63.900  -6.610  55.140  1.00  0.00           C
ATOM    133  HB1 ALA A 307      62.820  -6.670  55.040  1.00  0.00           H
ATOM    134  HB2 ALA A 307      64.130  -6.470  56.200  1.00  0.00           H
ATOM    135  HB3 ALA A 307      64.180  -5.680  54.640  1.00  0.00           H
ATOM    136  C   ALA A 307      64.480  -9.150  55.220  1.00  0.00           C
ATOM    137  O   ALA A 307      65.350  -9.590  55.980  1.00  0.00           O
ATOM    138  N   LEU A 308      63.350  -9.830  54.920  1.00  0.00           N
ATOM    139  H   LEU A 308      62.680  -9.390  54.310  1.00  0.00           H
ATOM    140  CA  LEU A 308      63.050 -11.130  55.450  1.00  0.00           C
ATOM    141  HA  LEU A 308      63.010 -11.140  56.540  1.00  0.00           H
ATOM    142  CB  LEU A 308      61.620 -11.410  54.950  1.00  0.00           C
ATOM    143  HB1 LEU A 308      61.400 -12.470  55.040  1.00  0.00           H
ATOM    144  HB2 LEU A 308      61.550 -11.170  53.890  1.00  0.00           H
ATOM    145  CG  LEU A 308      60.480 -10.710  55.780  1.00  0.00           C
ATOM    146  HG  LEU A 308      60.690  -9.650  55.920  1.00  0.00           H
ATOM    147  CD1 LEU A 308      59.300 -10.680  54.900  1.00  0.00           C
ATOM    148 1HD1 LEU A 308      58.380 -10.380  55.390  1.00  0.00           H
ATOM    149 2HD1 LEU A 308      59.470 -10.140  53.970  1.00  0.00           H
ATOM    150 3HD1 LEU A 308      59.180 -11.740  54.680  1.00  0.00           H
ATOM    151  CD2 LEU A 308      60.250 -11.290  57.150  1.00  0.00           C
ATOM    152 1HD2 LEU A 308      61.220 -11.360  57.650  1.00  0.00           H
ATOM    153 2HD2 LEU A 308      59.630 -10.550  57.660  1.00  0.00           H
ATOM    154 3HD2 LEU A 308      59.710 -12.240  57.240  1.00  0.00           H
ATOM    155  C   LEU A 308      64.090 -12.140  54.980  1.00  0.00           C
ATOM    156  O   LEU A 308      64.610 -12.920  55.790  1.00  0.00           O
ATOM    157  N   GLN A 309      64.560 -12.020  53.730  1.00  0.00           N
ATOM    158  H   GLN A 309      64.140 -11.310  53.160  1.00  0.00           H
ATOM    159  CA  GLN A 309      65.600 -12.820  53.100  1.00  0.00           C
ATOM    160  HA  GLN A 309      65.360 -13.830  53.430  1.00  0.00           H
ATOM    161  CB  GLN A 309      65.520 -12.700  51.630  1.00  0.00           C
ATOM    162  HB1 GLN A 309      66.400 -13.190  51.220  1.00  0.00           H
ATOM    163  HB2 GLN A 309      65.610 -11.680  51.260  1.00  0.00           H
ATOM    164  CG  GLN A 309      64.300 -13.380  50.940  1.00  0.00           C
ATOM    165  HG1 GLN A 309      63.380 -13.160  51.480  1.00  0.00           H
ATOM    166  HG2 GLN A 309      64.610 -14.420  51.010  1.00  0.00           H
ATOM    167  CD  GLN A 309      64.150 -13.100  49.500  1.00  0.00           C
ATOM    168  OE1 GLN A 309      64.550 -12.090  48.970  1.00  0.00           O
ATOM    169  NE2 GLN A 309      63.610 -14.030  48.660  1.00  0.00           N
ATOM    170 1HE2 GLN A 309      63.150 -14.860  49.020  1.00  0.00           H
ATOM    171 2HE2 GLN A 309      63.430 -13.850  47.680  1.00  0.00           H
ATOM    172  C   GLN A 309      67.080 -12.620  53.600  1.00  0.00           C
ATOM    173  O   GLN A 309      67.920 -13.400  53.220  1.00  0.00           O
ATOM    174  N   LEU A 310      67.310 -11.630  54.510  1.00  0.00           N
ATOM    175  H   LEU A 310      66.590 -10.990  54.820  1.00  0.00           H
ATOM    176  CA  LEU A 310      68.570 -11.460  55.250  1.00  0.00           C
ATOM    177  HA  LEU A 310      69.420 -11.460  54.570  1.00  0.00           H
ATOM    178  CB  LEU A 310      68.450 -10.170  56.010  1.00  0.00           C
ATOM    179  HB1 LEU A 310      69.340 -10.060  56.630  1.00  0.00           H
ATOM    180  HB2 LEU A 310      67.590 -10.230  56.680  1.00  0.00           H
ATOM    181  CG  LEU A 310      68.360  -8.860  55.120  1.00  0.00           C
ATOM    182  HG  LEU A 310      67.520  -8.910  54.440  1.00  0.00           H
ATOM    183  CD1 LEU A 310      68.370  -7.610  56.060  1.00  0.00           C
ATOM    184 1HD1 LEU A 310      68.370  -6.690  55.480  1.00  0.00           H
ATOM    185 2HD1 LEU A 310      67.380  -7.520  56.500  1.00  0.00           H
ATOM    186 3HD1 LEU A 310      69.010  -7.570  56.950  1.00  0.00           H
ATOM    187  CD2 LEU A 310      69.560  -8.640  54.320  1.00  0.00           C
ATOM    188 1HD2 LEU A 310      70.390  -8.410  54.990  1.00  0.00           H
ATOM    189 2HD2 LEU A 310      69.790  -9.510  53.700  1.00  0.00           H
ATOM    190 3HD2 LEU A 310      69.410  -7.750  53.710  1.00  0.00           H
ATOM    191  C   LEU A 310      68.900 -12.690  56.180  1.00  0.00           C
ATOM    192  O   LEU A 310      70.070 -13.190  56.150  1.00  0.00           O
ATOM    193  N   VAL A 311      67.850 -13.100  56.930  1.00  0.00           N
ATOM    194  H   VAL A 311      67.010 -12.550  56.890  1.00  0.00           H
ATOM    195  CA  VAL A 311      67.970 -13.890  58.130  1.00  0.00           C
ATOM    196  HA  VAL A 311      69.040 -13.920  58.330  1.00  0.00           H
ATOM    197  CB  VAL A 311      67.280 -13.300  59.360  1.00  0.00           C
ATOM    198  HB  VAL A 311      67.410 -13.930  60.240  1.00  0.00           H
ATOM    199  CG1 VAL A 311      67.970 -11.960  59.740  1.00  0.00           C
ATOM    200 1HG1 VAL A 311      69.010 -12.270  59.850  1.00  0.00           H
ATOM    201 2HG1 VAL A 311      67.730 -11.100  59.120  1.00  0.00           H
ATOM    202 3HG1 VAL A 311      67.610 -11.670  60.730  1.00  0.00           H
ATOM    203  CG2 VAL A 311      65.780 -12.980  59.100  1.00  0.00           C
ATOM    204 1HG2 VAL A 311      65.280 -13.930  59.240  1.00  0.00           H
ATOM    205 2HG2 VAL A 311      65.360 -12.220  59.760  1.00  0.00           H
ATOM    206 3HG2 VAL A 311      65.570 -12.550  58.110  1.00  0.00           H
ATOM    207  C   VAL A 311      67.460 -15.340  57.970  1.00  0.00           C
ATOM    208  O   VAL A 311      67.650 -16.260  58.870  1.00  0.00           O
ATOM    209  N   VAL A 312      66.730 -15.600  56.890  1.00  0.00           N
ATOM    210  H   VAL A 312      66.460 -14.940  56.170  1.00  0.00           H
ATOM    211  CA  VAL A 312      66.170 -16.960  56.550  1.00  0.00           C
ATOM    212  HA  VAL A 312      66.160 -17.550  57.470  1.00  0.00           H
ATOM    213  CB  VAL A 312      64.700 -16.790  56.080  1.00  0.00           C
ATOM    214  HB  VAL A 312      64.360 -17.820  56.040  1.00  0.00           H
ATOM    215  CG1 VAL A 312      63.760 -16.060  57.110  1.00  0.00           C
ATOM    216 1HG1 VAL A 312      63.890 -14.990  56.940  1.00  0.00           H
ATOM    217 2HG1 VAL A 312      62.730 -16.310  56.830  1.00  0.00           H
ATOM    218 3HG1 VAL A 312      64.100 -16.540  58.030  1.00  0.00           H
ATOM    219  CG2 VAL A 312      64.570 -16.260  54.670  1.00  0.00           C
ATOM    220 1HG2 VAL A 312      64.440 -15.180  54.780  1.00  0.00           H
ATOM    221 2HG2 VAL A 312      65.320 -16.490  53.910  1.00  0.00           H
ATOM    222 3HG2 VAL A 312      63.630 -16.680  54.300  1.00  0.00           H
ATOM    223  C   VAL A 312      67.020 -17.740  55.640  1.00  0.00           C
ATOM    224  O   VAL A 312      67.770 -17.140  54.840  1.00  0.00           O
ATOM    225  N   ASP A 313      66.940 -19.070  55.600  1.00  0.00           N
ATOM    226  H   ASP A 313      66.270 -19.490  56.230  1.00  0.00           H
ATOM    227  CA  ASP A 313      67.830 -19.970  54.890  1.00  0.00           C
ATOM    228  HA  ASP A 313      68.770 -19.430  54.770  1.00  0.00           H
ATOM    229  CB  ASP A 313      68.050 -21.260  55.740  1.00  0.00           C
ATOM    230  HB1 ASP A 313      68.710 -21.960  55.220  1.00  0.00           H
ATOM    231  HB2 ASP A 313      67.130 -21.830  55.870  1.00  0.00           H
ATOM    232  CG  ASP A 313      68.530 -21.060  57.180  1.00  0.00           C
ATOM    233  OD1 ASP A 313      67.800 -21.330  58.120  1.00  0.00           O
ATOM    234  OD2 ASP A 313      69.700 -20.780  57.360  1.00  0.00           O
ATOM    235  C   ASP A 313      67.320 -20.240  53.470  1.00  0.00           C
ATOM    236  O   ASP A 313      66.170 -20.000  53.190  1.00  0.00           O
ATOM    237  N   PRO A 314      68.200 -20.620  52.510  1.00  0.00           N
ATOM    238  CD  PRO A 314      69.640 -20.790  52.660  1.00  0.00           C
ATOM    239  HD1 PRO A 314      69.870 -21.640  53.300  1.00  0.00           H
ATOM    240  HD2 PRO A 314      70.080 -19.850  52.980  1.00  0.00           H
ATOM    241  CG  PRO A 314      70.190 -21.150  51.290  1.00  0.00           C
ATOM    242  HG1 PRO A 314      70.240 -22.230  51.190  1.00  0.00           H
ATOM    243  HG2 PRO A 314      71.200 -20.770  51.120  1.00  0.00           H
ATOM    244  CB  PRO A 314      69.190 -20.540  50.290  1.00  0.00           C
ATOM    245  HB1 PRO A 314      69.190 -21.140  49.380  1.00  0.00           H
ATOM    246  HB2 PRO A 314      69.390 -19.470  50.230  1.00  0.00           H
ATOM    247  CA  PRO A 314      67.860 -20.790  51.070  1.00  0.00           C
ATOM    248  HA  PRO A 314      67.180 -19.980  50.790  1.00  0.00           H
ATOM    249  C   PRO A 314      67.240 -22.100  50.730  1.00  0.00           C
ATOM    250  O   PRO A 314      67.700 -23.240  50.980  1.00  0.00           O
ATOM    251  N   GLY A 315      66.030 -22.060  50.100  1.00  0.00           N
ATOM    252  H   GLY A 315      65.710 -21.120  49.910  1.00  0.00           H
ATOM    253  CA  GLY A 315      65.160 -23.130  49.720  1.00  0.00           C
ATOM    254  HA1 GLY A 315      65.620 -24.100  49.850  1.00  0.00           H
ATOM    255  HA2 GLY A 315      64.920 -23.160  48.660  1.00  0.00           H
ATOM    256  C   GLY A 315      63.810 -23.020  50.530  1.00  0.00           C
ATOM    257  O   GLY A 315      63.320 -22.000  50.780  1.00  0.00           O
ATOM    258  N   ASP A 316      63.080 -24.180  50.560  1.00  0.00           N
ATOM    259  H   ASP A 316      63.550 -25.020  50.260  1.00  0.00           H
ATOM    260  CA  ASP A 316      61.890 -24.310  51.370  1.00  0.00           C
ATOM    261  HA  ASP A 316      61.780 -23.460  52.040  1.00  0.00           H
ATOM    262  CB  ASP A 316      60.700 -24.330  50.440  1.00  0.00           C
ATOM    263  HB1 ASP A 316      60.390 -23.350  50.060  1.00  0.00           H
ATOM    264  HB2 ASP A 316      59.860 -24.680  51.050  1.00  0.00           H
ATOM    265  CG  ASP A 316      60.780 -25.320  49.250  1.00  0.00           C
ATOM    266  OD1 ASP A 316      60.530 -26.550  49.450  1.00  0.00           O
ATOM    267  OD2 ASP A 316      60.840 -24.820  48.140  1.00  0.00           O
ATOM    268  C   ASP A 316      61.880 -25.600  52.280  1.00  0.00           C
ATOM    269  O   ASP A 316      62.850 -26.360  52.110  1.00  0.00           O
ATOM    270  N   PRO A 317      60.910 -25.800  53.200  1.00  0.00           N
ATOM    271  CD  PRO A 317      59.840 -24.900  53.550  1.00  0.00           C
ATOM    272  HD1 PRO A 317      58.990 -25.030  52.880  1.00  0.00           H
ATOM    273  HD2 PRO A 317      59.980 -23.840  53.340  1.00  0.00           H
ATOM    274  CG  PRO A 317      59.490 -25.210  55.000  1.00  0.00           C
ATOM    275  HG1 PRO A 317      58.430 -25.120  55.250  1.00  0.00           H
ATOM    276  HG2 PRO A 317      60.000 -24.640  55.770  1.00  0.00           H
ATOM    277  CB  PRO A 317      59.790 -26.780  55.000  1.00  0.00           C
ATOM    278  HB1 PRO A 317      59.020 -27.230  54.380  1.00  0.00           H
ATOM    279  HB2 PRO A 317      59.850 -27.180  56.010  1.00  0.00           H
ATOM    280  CA  PRO A 317      61.070 -26.880  54.150  1.00  0.00           C
ATOM    281  HA  PRO A 317      61.940 -26.770  54.790  1.00  0.00           H
ATOM    282  C   PRO A 317      61.360 -28.240  53.570  1.00  0.00           C
ATOM    283  O   PRO A 317      62.210 -28.970  54.130  1.00  0.00           O
ATOM    284  N   ARG A 318      60.730 -28.640  52.480  1.00  0.00           N
ATOM    285  H   ARG A 318      59.920 -28.090  52.210  1.00  0.00           H
ATOM    286  CA  ARG A 318      60.980 -30.000  51.780  1.00  0.00           C
ATOM    287  HA  ARG A 318      61.000 -30.730  52.590  1.00  0.00           H
ATOM    288  CB  ARG A 318      59.900 -30.340  50.710  1.00  0.00           C
ATOM    289  HB1 ARG A 318      60.110 -29.880  49.750  1.00  0.00           H
ATOM    290  HB2 ARG A 318      59.020 -29.760  50.970  1.00  0.00           H
ATOM    291  CG  ARG A 318      59.680 -31.860  50.470  1.00  0.00           C
ATOM    292  HG1 ARG A 318      59.490 -32.460  51.360  1.00  0.00           H
ATOM    293  HG2 ARG A 318      60.540 -32.350  50.020  1.00  0.00           H
ATOM    294  CD  ARG A 318      58.530 -32.020  49.510  1.00  0.00           C
ATOM    295  HD1 ARG A 318      57.570 -31.720  49.930  1.00  0.00           H
ATOM    296  HD2 ARG A 318      58.350 -33.080  49.310  1.00  0.00           H
ATOM    297  NE  ARG A 318      58.710 -31.330  48.220  1.00  0.00           N
ATOM    298  HE  ARG A 318      58.280 -30.420  48.140  1.00  0.00           H
ATOM    299  CZ  ARG A 318      59.170 -31.940  47.100  1.00  0.00           C
ATOM    300  NH1 ARG A 318      59.650 -33.140  47.180  1.00  0.00           N
ATOM    301 1HH1 ARG A 318      59.540 -33.700  48.010  1.00  0.00           H
ATOM    302 2HH1 ARG A 318      60.230 -33.500  46.440  1.00  0.00           H
ATOM    303  NH2 ARG A 318      59.240 -31.310  46.020  1.00  0.00           N
ATOM    304 1HH2 ARG A 318      58.920 -30.360  45.940  1.00  0.00           H
ATOM    305 2HH2 ARG A 318      59.610 -31.820  45.230  1.00  0.00           H
ATOM    306  C   ARG A 318      62.450 -30.140  51.220  1.00  0.00           C
ATOM    307  O   ARG A 318      62.790 -31.260  50.820  1.00  0.00           O
ATOM    308  N   SER A 319      63.250 -29.100  51.110  1.00  0.00           N
ATOM    309  H   SER A 319      62.870 -28.220  51.420  1.00  0.00           H
ATOM    310  CA  SER A 319      64.670 -29.180  50.800  1.00  0.00           C
ATOM    311  HA  SER A 319      64.870 -29.910  50.020  1.00  0.00           H
ATOM    312  CB  SER A 319      65.130 -27.850  50.330  1.00  0.00           C
ATOM    313  HB1 SER A 319      66.210 -27.890  50.180  1.00  0.00           H
ATOM    314  HB2 SER A 319      64.810 -27.100  51.050  1.00  0.00           H
ATOM    315  OG  SER A 319      64.520 -27.710  49.110  1.00  0.00           O
ATOM    316  HG  SER A 319      63.620 -28.030  49.030  1.00  0.00           H
ATOM    317  C   SER A 319      65.500 -29.690  52.010  1.00  0.00           C
ATOM    318  O   SER A 319      66.630 -30.140  51.840  1.00  0.00           O
ATOM    319  N   TYR A 320      64.940 -29.660  53.250  1.00  0.00           N
ATOM    320  H   TYR A 320      63.970 -29.420  53.320  1.00  0.00           H
ATOM    321  CA  TYR A 320      65.640 -30.070  54.530  1.00  0.00           C
ATOM    322  HA  TYR A 320      66.590 -30.540  54.290  1.00  0.00           H
ATOM    323  CB  TYR A 320      65.950 -28.750  55.300  1.00  0.00           C
ATOM    324  HB1 TYR A 320      66.390 -28.920  56.280  1.00  0.00           H
ATOM    325  HB2 TYR A 320      65.010 -28.270  55.570  1.00  0.00           H
ATOM    326  CG  TYR A 320      66.780 -27.800  54.490  1.00  0.00           C
ATOM    327  CD1 TYR A 320      68.130 -28.050  54.290  1.00  0.00           C
ATOM    328  HD1 TYR A 320      68.640 -28.800  54.880  1.00  0.00           H
ATOM    329  CE1 TYR A 320      68.890 -27.220  53.390  1.00  0.00           C
ATOM    330  HE1 TYR A 320      69.950 -27.340  53.230  1.00  0.00           H
ATOM    331  CZ  TYR A 320      68.260 -26.210  52.660  1.00  0.00           C
ATOM    332  OH  TYR A 320      68.970 -25.420  51.800  1.00  0.00           O
ATOM    333  HH  TYR A 320      68.430 -24.690  51.500  1.00  0.00           H
ATOM    334  CE2 TYR A 320      66.920 -25.960  52.810  1.00  0.00           C
ATOM    335  HE2 TYR A 320      66.470 -25.160  52.240  1.00  0.00           H
ATOM    336  CD2 TYR A 320      66.180 -26.750  53.730  1.00  0.00           C
ATOM    337  HD2 TYR A 320      65.160 -26.460  53.890  1.00  0.00           H
ATOM    338  C   TYR A 320      64.860 -30.950  55.440  1.00  0.00           C
ATOM    339  O   TYR A 320      65.410 -31.410  56.460  1.00  0.00           O
ATOM    340  N   LEU A 321      63.630 -31.210  55.140  1.00  0.00           N
ATOM    341  H   LEU A 321      63.210 -30.810  54.320  1.00  0.00           H
ATOM    342  CA  LEU A 321      62.630 -31.940  55.960  1.00  0.00           C
ATOM    343  HA  LEU A 321      63.200 -32.580  56.630  1.00  0.00           H
ATOM    344  CB  LEU A 321      61.700 -31.030  56.810  1.00  0.00           C
ATOM    345  HB1 LEU A 321      61.070 -31.650  57.450  1.00  0.00           H
ATOM    346  HB2 LEU A 321      61.030 -30.450  56.190  1.00  0.00           H
ATOM    347  CG  LEU A 321      62.350 -30.070  57.870  1.00  0.00           C
ATOM    348  HG  LEU A 321      63.030 -29.310  57.480  1.00  0.00           H
ATOM    349  CD1 LEU A 321      61.190 -29.350  58.400  1.00  0.00           C
ATOM    350 1HD1 LEU A 321      60.840 -28.700  57.600  1.00  0.00           H
ATOM    351 2HD1 LEU A 321      60.430 -29.980  58.860  1.00  0.00           H
ATOM    352 3HD1 LEU A 321      61.520 -28.680  59.190  1.00  0.00           H
ATOM    353  CD2 LEU A 321      63.060 -30.850  59.040  1.00  0.00           C
ATOM    354 1HD2 LEU A 321      63.740 -31.560  58.570  1.00  0.00           H
ATOM    355 2HD2 LEU A 321      63.680 -30.200  59.660  1.00  0.00           H
ATOM    356 3HD2 LEU A 321      62.260 -31.380  59.550  1.00  0.00           H
ATOM    357  C   LEU A 321      61.800 -32.900  55.120  1.00  0.00           C
ATOM    358  O   LEU A 321      61.720 -32.800  53.890  1.00  0.00           O
ATOM    359  N   ASP A 322      61.160 -33.810  55.820  1.00  0.00           N
ATOM    360  H   ASP A 322      61.320 -33.770  56.820  1.00  0.00           H
ATOM    361  CA  ASP A 322      60.330 -34.820  55.170  1.00  0.00           C
ATOM    362  HA  ASP A 322      59.710 -34.500  54.330  1.00  0.00           H
ATOM    363  CB  ASP A 322      61.350 -35.900  54.590  1.00  0.00           C
ATOM    364  HB1 ASP A 322      61.660 -36.510  55.440  1.00  0.00           H
ATOM    365  HB2 ASP A 322      62.100 -35.390  53.980  1.00  0.00           H
ATOM    366  CG  ASP A 322      60.680 -36.870  53.620  1.00  0.00           C
ATOM    367  OD1 ASP A 322      61.320 -37.860  53.270  1.00  0.00           O
ATOM    368  OD2 ASP A 322      59.580 -36.560  53.100  1.00  0.00           O
ATOM    369  C   ASP A 322      59.420 -35.450  56.250  1.00  0.00           C
ATOM    370  O   ASP A 322      59.630 -35.220  57.470  1.00  0.00           O
ATOM    371  N   ASN A 323      58.400 -36.250  55.820  1.00  0.00           N
ATOM    372  H   ASN A 323      58.270 -36.380  54.820  1.00  0.00           H
ATOM    373  CA  ASN A 323      57.530 -37.050  56.640  1.00  0.00           C
ATOM    374  HA  ASN A 323      56.750 -37.490  56.020  1.00  0.00           H
ATOM    375  CB  ASN A 323      58.370 -38.260  57.330  1.00  0.00           C
ATOM    376  HB1 ASN A 323      57.680 -38.960  57.790  1.00  0.00           H
ATOM    377  HB2 ASN A 323      58.850 -37.870  58.230  1.00  0.00           H
ATOM    378  CG  ASN A 323      59.180 -39.020  56.330  1.00  0.00           C
ATOM    379  OD1 ASN A 323      58.570 -39.550  55.380  1.00  0.00           O
ATOM    380  ND2 ASN A 323      60.510 -39.020  56.360  1.00  0.00           N
ATOM    381 1HD2 ASN A 323      60.990 -38.320  56.910  1.00  0.00           H
ATOM    382 2HD2 ASN A 323      61.070 -39.630  55.780  1.00  0.00           H
ATOM    383  C   ASN A 323      56.790 -36.200  57.710  1.00  0.00           C
ATOM    384  O   ASN A 323      56.630 -36.670  58.840  1.00  0.00           O
ATOM    385  N   PHE A 324      56.460 -34.950  57.400  1.00  0.00           N
ATOM    386  H   PHE A 324      56.640 -34.620  56.460  1.00  0.00           H
ATOM    387  CA  PHE A 324      55.710 -34.080  58.240  1.00  0.00           C
ATOM    388  HA  PHE A 324      56.180 -33.770  59.180  1.00  0.00           H
ATOM    389  CB  PHE A 324      55.410 -32.820  57.430  1.00  0.00           C
ATOM    390  HB1 PHE A 324      54.890 -32.070  58.030  1.00  0.00           H
ATOM    391  HB2 PHE A 324      54.680 -32.980  56.640  1.00  0.00           H
ATOM    392  CG  PHE A 324      56.480 -32.070  56.680  1.00  0.00           C
ATOM    393  CD1 PHE A 324      57.370 -31.230  57.330  1.00  0.00           C
ATOM    394  HD1 PHE A 324      57.250 -30.850  58.330  1.00  0.00           H
ATOM    395  CE1 PHE A 324      58.300 -30.440  56.490  1.00  0.00           C
ATOM    396  HE1 PHE A 324      58.860 -29.590  56.880  1.00  0.00           H
ATOM    397  CZ  PHE A 324      58.480 -30.770  55.120  1.00  0.00           C
ATOM    398  HZ  PHE A 324      59.220 -30.260  54.510  1.00  0.00           H
ATOM    399  CE2 PHE A 324      57.620 -31.710  54.530  1.00  0.00           C
ATOM    400  HE2 PHE A 324      57.730 -31.910  53.470  1.00  0.00           H
ATOM    401  CD2 PHE A 324      56.600 -32.310  55.310  1.00  0.00           C
ATOM    402  HD2 PHE A 324      55.890 -32.920  54.780  1.00  0.00           H
ATOM    403  C   PHE A 324      54.430 -34.610  58.770  1.00  0.00           C
ATOM    404  O   PHE A 324      53.620 -35.030  57.930  1.00  0.00           O
ATOM    405  N   ILE A 325      54.110 -34.410  60.030  1.00  0.00           N
ATOM    406  H   ILE A 325      54.770 -34.060  60.710  1.00  0.00           H
ATOM    407  CA  ILE A 325      52.790 -34.720  60.580  1.00  0.00           C
ATOM    408  HA  ILE A 325      52.060 -35.040  59.830  1.00  0.00           H
ATOM    409  CB  ILE A 325      52.890 -35.930  61.460  1.00  0.00           C
ATOM    410  HB  ILE A 325      53.680 -35.700  62.180  1.00  0.00           H
ATOM    411  CG2 ILE A 325      51.450 -36.150  62.060  1.00  0.00           C
ATOM    412 1HG2 ILE A 325      51.400 -36.940  62.810  1.00  0.00           H
ATOM    413 2HG2 ILE A 325      51.180 -35.230  62.580  1.00  0.00           H
ATOM    414 3HG2 ILE A 325      50.740 -36.450  61.290  1.00  0.00           H
ATOM    415  CG1 ILE A 325      53.400 -37.130  60.600  1.00  0.00           C
ATOM    416 1HG1 ILE A 325      54.380 -37.000  60.160  1.00  0.00           H
ATOM    417 2HG1 ILE A 325      52.630 -37.410  59.880  1.00  0.00           H
ATOM    418  CD  ILE A 325      53.490 -38.430  61.430  1.00  0.00           C
ATOM    419  HD1 ILE A 325      52.540 -38.620  61.920  1.00  0.00           H
ATOM    420  HD2 ILE A 325      53.780 -39.350  60.930  1.00  0.00           H
ATOM    421  HD3 ILE A 325      54.210 -38.210  62.220  1.00  0.00           H
ATOM    422  C   ILE A 325      52.320 -33.440  61.370  1.00  0.00           C
ATOM    423  O   ILE A 325      53.030 -33.020  62.220  1.00  0.00           O
ATOM    424  N   LYS A 326      51.190 -32.790  61.020  1.00  0.00           N
ATOM    425  H   LYS A 326      50.710 -33.090  60.180  1.00  0.00           H
ATOM    426  CA  LYS A 326      50.740 -31.510  61.630  1.00  0.00           C
ATOM    427  HA  LYS A 326      51.520 -30.750  61.690  1.00  0.00           H
ATOM    428  CB  LYS A 326      49.640 -30.860  60.770  1.00  0.00           C
ATOM    429  HB1 LYS A 326      48.730 -31.450  60.750  1.00  0.00           H
ATOM    430  HB2 LYS A 326      50.080 -30.670  59.780  1.00  0.00           H
ATOM    431  CG  LYS A 326      49.220 -29.580  61.500  1.00  0.00           C
ATOM    432  HG1 LYS A 326      50.000 -28.830  61.650  1.00  0.00           H
ATOM    433  HG2 LYS A 326      48.870 -29.820  62.500  1.00  0.00           H
ATOM    434  CD  LYS A 326      48.150 -28.690  60.860  1.00  0.00           C
ATOM    435  HD1 LYS A 326      48.510 -28.100  60.020  1.00  0.00           H
ATOM    436  HD2 LYS A 326      47.730 -28.020  61.610  1.00  0.00           H
ATOM    437  CE  LYS A 326      47.030 -29.490  60.290  1.00  0.00           C
ATOM    438  HE1 LYS A 326      46.690 -30.280  60.960  1.00  0.00           H
ATOM    439  HE2 LYS A 326      47.370 -29.980  59.380  1.00  0.00           H
ATOM    440  NZ  LYS A 326      45.870 -28.590  59.950  1.00  0.00           N
ATOM    441  HZ1 LYS A 326      46.280 -27.840  59.410  1.00  0.00           H
ATOM    442  HZ2 LYS A 326      45.190 -29.080  59.400  1.00  0.00           H
ATOM    443  HZ3 LYS A 326      45.500 -28.200  60.800  1.00  0.00           H
ATOM    444  C   LYS A 326      50.190 -31.890  63.060  1.00  0.00           C
ATOM    445  O   LYS A 326      49.370 -32.800  63.170  1.00  0.00           O
ATOM    446  N   ILE A 327      50.760 -31.310  64.150  1.00  0.00           N
ATOM    447  H   ILE A 327      51.500 -30.670  63.930  1.00  0.00           H
ATOM    448  CA  ILE A 327      50.460 -31.690  65.570  1.00  0.00           C
ATOM    449  HA  ILE A 327      49.880 -32.610  65.520  1.00  0.00           H
ATOM    450  CB  ILE A 327      51.850 -31.920  66.310  1.00  0.00           C
ATOM    451  HB  ILE A 327      52.490 -32.420  65.580  1.00  0.00           H
ATOM    452  CG2 ILE A 327      52.560 -30.620  66.440  1.00  0.00           C
ATOM    453 1HG2 ILE A 327      51.890 -29.970  66.990  1.00  0.00           H
ATOM    454 2HG2 ILE A 327      53.520 -30.670  66.950  1.00  0.00           H
ATOM    455 3HG2 ILE A 327      52.730 -30.160  65.460  1.00  0.00           H
ATOM    456  CG1 ILE A 327      51.710 -32.710  67.590  1.00  0.00           C
ATOM    457 1HG1 ILE A 327      51.180 -32.200  68.380  1.00  0.00           H
ATOM    458 2HG1 ILE A 327      52.710 -32.970  67.940  1.00  0.00           H
ATOM    459  CD  ILE A 327      51.100 -34.070  67.250  1.00  0.00           C
ATOM    460  HD1 ILE A 327      51.490 -34.770  68.000  1.00  0.00           H
ATOM    461  HD2 ILE A 327      50.010 -33.990  67.220  1.00  0.00           H
ATOM    462  HD3 ILE A 327      51.380 -34.450  66.270  1.00  0.00           H
ATOM    463  C   ILE A 327      49.470 -30.700  66.260  1.00  0.00           C
ATOM    464  O   ILE A 327      48.840 -31.060  67.300  1.00  0.00           O
ATOM    465  N   GLY A 328      49.380 -29.500  65.740  1.00  0.00           N
ATOM    466  H   GLY A 328      49.990 -29.170  65.000  1.00  0.00           H
ATOM    467  CA  GLY A 328      48.520 -28.600  66.410  1.00  0.00           C
ATOM    468  HA1 GLY A 328      48.870 -28.500  67.440  1.00  0.00           H
ATOM    469  HA2 GLY A 328      47.540 -29.080  66.440  1.00  0.00           H
ATOM    470  C   GLY A 328      48.390 -27.240  65.710  1.00  0.00           C
ATOM    471  O   GLY A 328      49.100 -26.940  64.790  1.00  0.00           O
ATOM    472  N   GLU A 329      47.500 -26.370  66.160  1.00  0.00           N
ATOM    473  H   GLU A 329      46.920 -26.600  66.960  1.00  0.00           H
ATOM    474  CA  GLU A 329      47.270 -25.010  65.710  1.00  0.00           C
ATOM    475  HA  GLU A 329      48.140 -24.830  65.080  1.00  0.00           H
ATOM    476  CB  GLU A 329      46.020 -24.960  64.830  1.00  0.00           C
ATOM    477  HB1 GLU A 329      45.220 -25.230  65.510  1.00  0.00           H
ATOM    478  HB2 GLU A 329      46.030 -25.640  63.980  1.00  0.00           H
ATOM    479  CG  GLU A 329      45.840 -23.550  64.180  1.00  0.00           C
ATOM    480  HG1 GLU A 329      46.650 -23.370  63.460  1.00  0.00           H
ATOM    481  HG2 GLU A 329      45.880 -22.770  64.940  1.00  0.00           H
ATOM    482  CD  GLU A 329      44.500 -23.490  63.350  1.00  0.00           C
ATOM    483  OE1 GLU A 329      44.540 -22.790  62.330  1.00  0.00           O
ATOM    484  OE2 GLU A 329      43.460 -24.070  63.590  1.00  0.00           O
ATOM    485  C   GLU A 329      47.270 -24.020  66.880  1.00  0.00           C
ATOM    486  O   GLU A 329      46.550 -24.230  67.840  1.00  0.00           O
ATOM    487  N   GLY A 330      48.100 -22.960  66.780  1.00  0.00           N
ATOM    488  H   GLY A 330      48.560 -22.740  65.910  1.00  0.00           H
ATOM    489  CA  GLY A 330      48.410 -22.090  67.960  1.00  0.00           C
ATOM    490  HA1 GLY A 330      49.400 -22.260  68.370  1.00  0.00           H
ATOM    491  HA2 GLY A 330      47.760 -22.310  68.810  1.00  0.00           H
ATOM    492  C   GLY A 330      48.360 -20.570  67.590  1.00  0.00           C
ATOM    493  O   GLY A 330      48.040 -20.150  66.450  1.00  0.00           O
ATOM    494  N   SER A 331      48.880 -19.780  68.520  1.00  0.00           N
ATOM    495  H   SER A 331      49.240 -20.160  69.380  1.00  0.00           H
ATOM    496  CA  SER A 331      48.840 -18.330  68.470  1.00  0.00           C
ATOM    497  HA  SER A 331      47.840 -17.980  68.710  1.00  0.00           H
ATOM    498  CB  SER A 331      49.890 -17.700  69.470  1.00  0.00           C
ATOM    499  HB1 SER A 331      49.770 -16.620  69.540  1.00  0.00           H
ATOM    500  HB2 SER A 331      50.910 -17.950  69.180  1.00  0.00           H
ATOM    501  OG  SER A 331      49.510 -18.060  70.730  1.00  0.00           O
ATOM    502  HG  SER A 331      50.160 -17.690  71.330  1.00  0.00           H
ATOM    503  C   SER A 331      49.250 -17.640  67.140  1.00  0.00           C
ATOM    504  O   SER A 331      48.900 -16.510  66.820  1.00  0.00           O
ATOM    505  N   THR A 332      50.240 -18.190  66.430  1.00  0.00           N
ATOM    506  H   THR A 332      50.700 -18.970  66.880  1.00  0.00           H
ATOM    507  CA  THR A 332      50.680 -17.610  65.100  1.00  0.00           C
ATOM    508  HA  THR A 332      50.120 -16.690  64.950  1.00  0.00           H
ATOM    509  CB  THR A 332      52.250 -17.320  64.930  1.00  0.00           C
ATOM    510  HB  THR A 332      52.450 -17.200  63.870  1.00  0.00           H
ATOM    511  CG2 THR A 332      52.670 -16.050  65.620  1.00  0.00           C
ATOM    512 1HG2 THR A 332      52.090 -15.170  65.330  1.00  0.00           H
ATOM    513 2HG2 THR A 332      52.390 -16.110  66.670  1.00  0.00           H
ATOM    514 3HG2 THR A 332      53.720 -15.750  65.520  1.00  0.00           H
ATOM    515  OG1 THR A 332      53.030 -18.330  65.460  1.00  0.00           O
ATOM    516  HG1 THR A 332      53.930 -18.010  65.370  1.00  0.00           H
ATOM    517  C   THR A 332      50.300 -18.430  63.850  1.00  0.00           C
ATOM    518  O   THR A 332      50.160 -17.860  62.760  1.00  0.00           O
ATOM    519  N   GLY A 333      50.170 -19.780  63.970  1.00  0.00           N
ATOM    520  H   GLY A 333      50.290 -20.200  64.880  1.00  0.00           H
ATOM    521  CA  GLY A 333      49.880 -20.700  62.830  1.00  0.00           C
ATOM    522  HA1 GLY A 333      50.440 -20.430  61.940  1.00  0.00           H
ATOM    523  HA2 GLY A 333      48.830 -20.580  62.600  1.00  0.00           H
ATOM    524  C   GLY A 333      49.970 -22.190  63.220  1.00  0.00           C
ATOM    525  O   GLY A 333      50.110 -22.520  64.370  1.00  0.00           O
ATOM    526  N   ILE A 334      49.950 -23.040  62.240  1.00  0.00           N
ATOM    527  H   ILE A 334      50.010 -22.700  61.290  1.00  0.00           H
ATOM    528  CA  ILE A 334      50.010 -24.480  62.310  1.00  0.00           C
ATOM    529  HA  ILE A 334      49.390 -24.730  63.170  1.00  0.00           H
ATOM    530  CB  ILE A 334      49.440 -25.240  61.060  1.00  0.00           C
ATOM    531  HB  ILE A 334      49.620 -26.280  61.340  1.00  0.00           H
ATOM    532  CG2 ILE A 334      47.950 -24.910  60.780  1.00  0.00           C
ATOM    533 1HG2 ILE A 334      47.450 -25.250  61.680  1.00  0.00           H
ATOM    534 2HG2 ILE A 334      47.690 -23.850  60.680  1.00  0.00           H
ATOM    535 3HG2 ILE A 334      47.680 -25.480  59.890  1.00  0.00           H
ATOM    536  CG1 ILE A 334      50.240 -24.880  59.850  1.00  0.00           C
ATOM    537 1HG1 ILE A 334      51.210 -24.440  60.080  1.00  0.00           H
ATOM    538 2HG1 ILE A 334      49.650 -24.120  59.340  1.00  0.00           H
ATOM    539  CD  ILE A 334      50.510 -26.070  58.890  1.00  0.00           C
ATOM    540  HD1 ILE A 334      51.150 -25.780  58.060  1.00  0.00           H
ATOM    541  HD2 ILE A 334      51.000 -26.890  59.410  1.00  0.00           H
ATOM    542  HD3 ILE A 334      49.520 -26.350  58.510  1.00  0.00           H
ATOM    543  C   ILE A 334      51.480 -24.920  62.720  1.00  0.00           C
ATOM    544  O   ILE A 334      52.450 -24.280  62.380  1.00  0.00           O
ATOM    545  N   VAL A 335      51.500 -25.990  63.490  1.00  0.00           N
ATOM    546  H   VAL A 335      50.670 -26.450  63.820  1.00  0.00           H
ATOM    547  CA  VAL A 335      52.770 -26.570  63.870  1.00  0.00           C
ATOM    548  HA  VAL A 335      53.560 -26.160  63.240  1.00  0.00           H
ATOM    549  CB  VAL A 335      53.020 -26.140  65.360  1.00  0.00           C
ATOM    550  HB  VAL A 335      53.160 -25.070  65.460  1.00  0.00           H
ATOM    551  CG1 VAL A 335      51.950 -26.390  66.370  1.00  0.00           C
ATOM    552 1HG1 VAL A 335      50.930 -26.140  66.050  1.00  0.00           H
ATOM    553 2HG1 VAL A 335      51.840 -27.440  66.630  1.00  0.00           H
ATOM    554 3HG1 VAL A 335      52.220 -25.890  67.300  1.00  0.00           H
ATOM    555  CG2 VAL A 335      54.270 -26.810  65.900  1.00  0.00           C
ATOM    556 1HG2 VAL A 335      54.970 -26.880  65.070  1.00  0.00           H
ATOM    557 2HG2 VAL A 335      54.710 -26.210  66.700  1.00  0.00           H
ATOM    558 3HG2 VAL A 335      54.060 -27.840  66.190  1.00  0.00           H
ATOM    559  C   VAL A 335      52.780 -28.040  63.580  1.00  0.00           C
ATOM    560  O   VAL A 335      51.730 -28.710  63.790  1.00  0.00           O
ATOM    561  N   CYS A 336      53.940 -28.580  63.180  1.00  0.00           N
ATOM    562  H   CYS A 336      54.600 -27.860  62.920  1.00  0.00           H
ATOM    563  CA  CYS A 336      54.080 -30.030  62.850  1.00  0.00           C
ATOM    564  HA  CYS A 336      53.150 -30.570  63.010  1.00  0.00           H
ATOM    565  CB  CYS A 336      54.370 -30.130  61.300  1.00  0.00           C
ATOM    566  HB1 CYS A 336      54.510 -31.180  61.050  1.00  0.00           H
ATOM    567  HB2 CYS A 336      55.320 -29.650  61.060  1.00  0.00           H
ATOM    568  SG  CYS A 336      53.130 -29.350  60.250  1.00  0.00           S
ATOM    569  HG  CYS A 336      53.790 -29.150  59.100  1.00  0.00           H
ATOM    570  C   CYS A 336      55.300 -30.690  63.540  1.00  0.00           C
ATOM    571  O   CYS A 336      56.220 -29.950  63.770  1.00  0.00           O
ATOM    572  N   ILE A 337      55.340 -32.040  63.690  1.00  0.00           N
ATOM    573  H   ILE A 337      54.530 -32.520  63.320  1.00  0.00           H
ATOM    574  CA  ILE A 337      56.580 -32.760  63.920  1.00  0.00           C
ATOM    575  HA  ILE A 337      57.440 -32.130  64.170  1.00  0.00           H
ATOM    576  CB  ILE A 337      56.300 -33.830  64.980  1.00  0.00           C
ATOM    577  HB  ILE A 337      55.510 -34.460  64.560  1.00  0.00           H
ATOM    578  CG2 ILE A 337      57.540 -34.730  65.160  1.00  0.00           C
ATOM    579 1HG2 ILE A 337      58.400 -34.080  65.310  1.00  0.00           H
ATOM    580 2HG2 ILE A 337      57.420 -35.440  65.980  1.00  0.00           H
ATOM    581 3HG2 ILE A 337      57.670 -35.300  64.240  1.00  0.00           H
ATOM    582  CG1 ILE A 337      55.720 -33.290  66.280  1.00  0.00           C
ATOM    583 1HG1 ILE A 337      55.480 -34.110  66.950  1.00  0.00           H
ATOM    584 2HG1 ILE A 337      54.720 -32.890  66.110  1.00  0.00           H
ATOM    585  CD  ILE A 337      56.470 -32.250  67.030  1.00  0.00           C
ATOM    586  HD1 ILE A 337      57.050 -32.690  67.840  1.00  0.00           H
ATOM    587  HD2 ILE A 337      57.190 -31.780  66.360  1.00  0.00           H
ATOM    588  HD3 ILE A 337      55.920 -31.420  67.470  1.00  0.00           H
ATOM    589  C   ILE A 337      56.990 -33.360  62.560  1.00  0.00           C
ATOM    590  O   ILE A 337      56.160 -33.970  61.930  1.00  0.00           O
ATOM    591  N   ALA A 338      58.270 -33.280  62.140  1.00  0.00           N
ATOM    592  H   ALA A 338      58.820 -32.670  62.730  1.00  0.00           H
ATOM    593  CA  ALA A 338      58.780 -33.700  60.860  1.00  0.00           C
ATOM    594  HA  ALA A 338      58.150 -34.510  60.490  1.00  0.00           H
ATOM    595  CB  ALA A 338      58.640 -32.480  59.950  1.00  0.00           C
ATOM    596  HB1 ALA A 338      58.560 -32.860  58.930  1.00  0.00           H
ATOM    597  HB2 ALA A 338      57.790 -31.850  60.230  1.00  0.00           H
ATOM    598  HB3 ALA A 338      59.560 -31.900  60.030  1.00  0.00           H
ATOM    599  C   ALA A 338      60.160 -34.290  61.090  1.00  0.00           C
ATOM    600  O   ALA A 338      60.890 -33.950  62.060  1.00  0.00           O
ATOM    601  N   THR A 339      60.500 -35.160  60.190  1.00  0.00           N
ATOM    602  H   THR A 339      59.880 -35.070  59.390  1.00  0.00           H
ATOM    603  CA  THR A 339      61.900 -35.720  60.190  1.00  0.00           C
ATOM    604  HA  THR A 339      62.110 -35.750  61.260  1.00  0.00           H
ATOM    605  CB  THR A 339      62.150 -37.080  59.570  1.00  0.00           C
ATOM    606  HB  THR A 339      63.220 -37.210  59.460  1.00  0.00           H
ATOM    607  CG2 THR A 339      61.400 -38.230  60.220  1.00  0.00           C
ATOM    608 1HG2 THR A 339      60.330 -38.050  60.250  1.00  0.00           H
ATOM    609 2HG2 THR A 339      61.710 -39.210  59.870  1.00  0.00           H
ATOM    610 3HG2 THR A 339      61.720 -38.340  61.260  1.00  0.00           H
ATOM    611  OG1 THR A 339      61.700 -37.060  58.230  1.00  0.00           O
ATOM    612  HG1 THR A 339      61.180 -36.260  58.180  1.00  0.00           H
ATOM    613  C   THR A 339      62.820 -34.620  59.560  1.00  0.00           C
ATOM    614  O   THR A 339      62.340 -33.940  58.630  1.00  0.00           O
ATOM    615  N   VAL A 340      64.070 -34.650  59.930  1.00  0.00           N
ATOM    616  H   VAL A 340      64.330 -35.250  60.690  1.00  0.00           H
ATOM    617  CA  VAL A 340      65.200 -34.200  59.170  1.00  0.00           C
ATOM    618  HA  VAL A 340      64.980 -33.220  58.750  1.00  0.00           H
ATOM    619  CB  VAL A 340      66.530 -34.120  60.000  1.00  0.00           C
ATOM    620  HB  VAL A 340      66.820 -35.160  60.180  1.00  0.00           H
ATOM    621  CG1 VAL A 340      67.660 -33.460  59.260  1.00  0.00           C
ATOM    622 1HG1 VAL A 340      67.880 -33.880  58.280  1.00  0.00           H
ATOM    623 2HG1 VAL A 340      67.240 -32.460  59.170  1.00  0.00           H
ATOM    624 3HG1 VAL A 340      68.620 -33.430  59.770  1.00  0.00           H
ATOM    625  CG2 VAL A 340      66.370 -33.390  61.400  1.00  0.00           C
ATOM    626 1HG2 VAL A 340      66.070 -32.350  61.270  1.00  0.00           H
ATOM    627 2HG2 VAL A 340      65.620 -33.900  62.000  1.00  0.00           H
ATOM    628 3HG2 VAL A 340      67.360 -33.230  61.840  1.00  0.00           H
ATOM    629  C   VAL A 340      65.390 -35.140  57.930  1.00  0.00           C
ATOM    630  O   VAL A 340      65.270 -36.330  58.120  1.00  0.00           O
ATOM    631  N   ARG A 341      65.470 -34.540  56.710  1.00  0.00           N
ATOM    632  H   ARG A 341      65.530 -33.540  56.640  1.00  0.00           H
ATOM    633  CA  ARG A 341      65.620 -35.310  55.450  1.00  0.00           C
ATOM    634  HA  ARG A 341      64.720 -35.890  55.270  1.00  0.00           H
ATOM    635  CB  ARG A 341      65.690 -34.370  54.160  1.00  0.00           C
ATOM    636  HB1 ARG A 341      66.600 -33.770  54.210  1.00  0.00           H
ATOM    637  HB2 ARG A 341      64.820 -33.720  54.160  1.00  0.00           H
ATOM    638  CG  ARG A 341      65.850 -35.080  52.760  1.00  0.00           C
ATOM    639  HG1 ARG A 341      65.250 -35.990  52.780  1.00  0.00           H
ATOM    640  HG2 ARG A 341      66.900 -35.310  52.580  1.00  0.00           H
ATOM    641  CD  ARG A 341      65.330 -34.120  51.680  1.00  0.00           C
ATOM    642  HD1 ARG A 341      65.610 -34.440  50.680  1.00  0.00           H
ATOM    643  HD2 ARG A 341      65.780 -33.140  51.810  1.00  0.00           H
ATOM    644  NE  ARG A 341      63.830 -34.020  51.700  1.00  0.00           N
ATOM    645  HE  ARG A 341      63.480 -33.170  52.120  1.00  0.00           H
ATOM    646  CZ  ARG A 341      62.960 -34.940  51.410  1.00  0.00           C
ATOM    647  NH1 ARG A 341      63.340 -36.060  50.810  1.00  0.00           N
ATOM    648 1HH1 ARG A 341      64.300 -36.160  50.500  1.00  0.00           H
ATOM    649 2HH1 ARG A 341      62.690 -36.830  50.790  1.00  0.00           H
ATOM    650  NH2 ARG A 341      61.750 -34.750  51.660  1.00  0.00           N
ATOM    651 1HH2 ARG A 341      61.580 -33.980  52.290  1.00  0.00           H
ATOM    652 2HH2 ARG A 341      61.020 -35.310  51.240  1.00  0.00           H
ATOM    653  C   ARG A 341      66.760 -36.280  55.500  1.00  0.00           C
ATOM    654  O   ARG A 341      67.870 -35.980  56.010  1.00  0.00           O
ATOM    655  N   SER A 342      66.450 -37.510  55.070  1.00  0.00           N
ATOM    656  H   SER A 342      65.550 -37.600  54.610  1.00  0.00           H
ATOM    657  CA  SER A 342      67.360 -38.700  54.950  1.00  0.00           C
ATOM    658  HA  SER A 342      66.800 -39.510  54.490  1.00  0.00           H
ATOM    659  CB  SER A 342      68.520 -38.340  53.940  1.00  0.00           C
ATOM    660  HB1 SER A 342      69.260 -39.140  53.940  1.00  0.00           H
ATOM    661  HB2 SER A 342      69.140 -37.550  54.360  1.00  0.00           H
ATOM    662  OG  SER A 342      68.180 -38.030  52.590  1.00  0.00           O
ATOM    663  HG  SER A 342      68.840 -37.370  52.330  1.00  0.00           H
ATOM    664  C   SER A 342      67.860 -39.280  56.240  1.00  0.00           C
ATOM    665  O   SER A 342      68.710 -40.220  56.270  1.00  0.00           O
ATOM    666  N   SER A 343      67.280 -38.740  57.360  1.00  0.00           N
ATOM    667  H   SER A 343      66.550 -38.050  57.300  1.00  0.00           H
ATOM    668  CA  SER A 343      67.560 -39.030  58.790  1.00  0.00           C
ATOM    669  HA  SER A 343      68.340 -39.800  58.800  1.00  0.00           H
ATOM    670  CB  SER A 343      68.090 -37.750  59.500  1.00  0.00           C
ATOM    671  HB1 SER A 343      67.270 -37.030  59.620  1.00  0.00           H
ATOM    672  HB2 SER A 343      68.910 -37.410  58.870  1.00  0.00           H
ATOM    673  OG  SER A 343      68.610 -38.060  60.760  1.00  0.00           O
ATOM    674  HG  SER A 343      69.440 -37.600  60.920  1.00  0.00           H
ATOM    675  C   SER A 343      66.400 -39.690  59.530  1.00  0.00           C
ATOM    676  O   SER A 343      65.250 -39.380  59.280  1.00  0.00           O
ATOM    677  N   GLY A 344      66.680 -40.430  60.590  1.00  0.00           N
ATOM    678  H   GLY A 344      67.660 -40.660  60.660  1.00  0.00           H
ATOM    679  CA  GLY A 344      65.740 -40.770  61.690  1.00  0.00           C
ATOM    680  HA1 GLY A 344      66.200 -41.570  62.270  1.00  0.00           H
ATOM    681  HA2 GLY A 344      64.830 -41.140  61.220  1.00  0.00           H
ATOM    682  C   GLY A 344      65.300 -39.650  62.610  1.00  0.00           C
ATOM    683  O   GLY A 344      64.250 -39.770  63.230  1.00  0.00           O
ATOM    684  N   LYS A 345      66.110 -38.580  62.880  1.00  0.00           N
ATOM    685  H   LYS A 345      66.990 -38.370  62.440  1.00  0.00           H
ATOM    686  CA  LYS A 345      65.720 -37.610  63.840  1.00  0.00           C
ATOM    687  HA  LYS A 345      65.410 -38.230  64.680  1.00  0.00           H
ATOM    688  CB  LYS A 345      66.950 -36.660  64.080  1.00  0.00           C
ATOM    689  HB1 LYS A 345      67.140 -36.120  63.150  1.00  0.00           H
ATOM    690  HB2 LYS A 345      67.790 -37.280  64.380  1.00  0.00           H
ATOM    691  CG  LYS A 345      66.630 -35.710  65.220  1.00  0.00           C
ATOM    692  HG1 LYS A 345      66.410 -36.250  66.140  1.00  0.00           H
ATOM    693  HG2 LYS A 345      65.740 -35.150  64.920  1.00  0.00           H
ATOM    694  CD  LYS A 345      67.830 -34.790  65.430  1.00  0.00           C
ATOM    695  HD1 LYS A 345      68.050 -34.260  64.500  1.00  0.00           H
ATOM    696  HD2 LYS A 345      68.700 -35.320  65.810  1.00  0.00           H
ATOM    697  CE  LYS A 345      67.600 -33.740  66.510  1.00  0.00           C
ATOM    698  HE1 LYS A 345      68.560 -33.230  66.570  1.00  0.00           H
ATOM    699  HE2 LYS A 345      67.510 -34.280  67.450  1.00  0.00           H
ATOM    700  NZ  LYS A 345      66.480 -32.860  66.350  1.00  0.00           N
ATOM    701  HZ1 LYS A 345      66.540 -32.290  65.520  1.00  0.00           H
ATOM    702  HZ2 LYS A 345      65.640 -33.440  66.350  1.00  0.00           H
ATOM    703  HZ3 LYS A 345      66.470 -32.340  67.220  1.00  0.00           H
ATOM    704  C   LYS A 345      64.510 -36.830  63.460  1.00  0.00           C
ATOM    705  O   LYS A 345      64.450 -36.530  62.270  1.00  0.00           O
ATOM    706  N   LEU A 346      63.720 -36.380  64.470  1.00  0.00           N
ATOM    707  H   LEU A 346      64.020 -36.670  65.390  1.00  0.00           H
ATOM    708  CA  LEU A 346      62.600 -35.430  64.390  1.00  0.00           C
ATOM    709  HA  LEU A 346      62.240 -35.340  63.370  1.00  0.00           H
ATOM    710  CB  LEU A 346      61.440 -35.850  65.260  1.00  0.00           C
ATOM    711  HB1 LEU A 346      60.680 -35.070  65.160  1.00  0.00           H
ATOM    712  HB2 LEU A 346      61.730 -35.840  66.310  1.00  0.00           H
ATOM    713  CG  LEU A 346      60.720 -37.200  64.980  1.00  0.00           C
ATOM    714  HG  LEU A 346      61.560 -37.890  65.010  1.00  0.00           H
ATOM    715  CD1 LEU A 346      59.680 -37.570  66.050  1.00  0.00           C
ATOM    716 1HD1 LEU A 346      59.770 -38.630  66.290  1.00  0.00           H
ATOM    717 2HD1 LEU A 346      59.860 -37.000  66.960  1.00  0.00           H
ATOM    718 3HD1 LEU A 346      58.690 -37.350  65.660  1.00  0.00           H
ATOM    719  CD2 LEU A 346      60.210 -37.200  63.540  1.00  0.00           C
ATOM    720 1HD2 LEU A 346      59.630 -36.280  63.410  1.00  0.00           H
ATOM    721 2HD2 LEU A 346      61.070 -37.100  62.880  1.00  0.00           H
ATOM    722 3HD2 LEU A 346      59.580 -38.070  63.390  1.00  0.00           H
ATOM    723  C   LEU A 346      62.970 -33.980  64.820  1.00  0.00           C
ATOM    724  O   LEU A 346      63.950 -33.680  65.510  1.00  0.00           O
ATOM    725  N   VAL A 347      62.170 -33.040  64.270  1.00  0.00           N
ATOM    726  H   VAL A 347      61.520 -33.230  63.510  1.00  0.00           H
ATOM    727  CA  VAL A 347      62.120 -31.700  64.830  1.00  0.00           C
ATOM    728  HA  VAL A 347      62.440 -31.690  65.870  1.00  0.00           H
ATOM    729  CB  VAL A 347      62.970 -30.770  64.000  1.00  0.00           C
ATOM    730  HB  VAL A 347      62.940 -29.810  64.520  1.00  0.00           H
ATOM    731  CG1 VAL A 347      64.510 -31.090  64.030  1.00  0.00           C
ATOM    732 1HG1 VAL A 347      65.060 -30.510  63.290  1.00  0.00           H
ATOM    733 2HG1 VAL A 347      64.950 -30.960  65.010  1.00  0.00           H
ATOM    734 3HG1 VAL A 347      64.770 -32.120  63.770  1.00  0.00           H
ATOM    735  CG2 VAL A 347      62.550 -30.730  62.510  1.00  0.00           C
ATOM    736 1HG2 VAL A 347      62.630 -31.710  62.040  1.00  0.00           H
ATOM    737 2HG2 VAL A 347      61.540 -30.330  62.450  1.00  0.00           H
ATOM    738 3HG2 VAL A 347      63.230 -30.060  61.990  1.00  0.00           H
ATOM    739  C   VAL A 347      60.700 -31.160  64.820  1.00  0.00           C
ATOM    740  O   VAL A 347      59.790 -31.830  64.300  1.00  0.00           O
ATOM    741  N   ALA A 348      60.400 -30.030  65.440  1.00  0.00           N
ATOM    742  H   ALA A 348      61.120 -29.520  65.940  1.00  0.00           H
ATOM    743  CA  ALA A 348      59.160 -29.350  65.190  1.00  0.00           C
ATOM    744  HA  ALA A 348      58.320 -30.030  65.070  1.00  0.00           H
ATOM    745  CB  ALA A 348      58.770 -28.730  66.560  1.00  0.00           C
ATOM    746  HB1 ALA A 348      59.660 -28.370  67.080  1.00  0.00           H
ATOM    747  HB2 ALA A 348      57.990 -27.970  66.420  1.00  0.00           H
ATOM    748  HB3 ALA A 348      58.310 -29.420  67.260  1.00  0.00           H
ATOM    749  C   ALA A 348      59.250 -28.240  64.080  1.00  0.00           C
ATOM    750  O   ALA A 348      60.410 -27.800  63.910  1.00  0.00           O
ATOM    751  N   VAL A 349      58.290 -27.900  63.310  1.00  0.00           N
ATOM    752  H   VAL A 349      57.460 -28.460  63.390  1.00  0.00           H
ATOM    753  CA  VAL A 349      58.360 -26.840  62.300  1.00  0.00           C
ATOM    754  HA  VAL A 349      59.010 -26.070  62.720  1.00  0.00           H
ATOM    755  CB  VAL A 349      58.840 -27.460  60.920  1.00  0.00           C
ATOM    756  HB  VAL A 349      59.710 -28.080  61.160  1.00  0.00           H
ATOM    757  CG1 VAL A 349      57.820 -28.340  60.250  1.00  0.00           C
ATOM    758 1HG1 VAL A 349      57.580 -29.160  60.920  1.00  0.00           H
ATOM    759 2HG1 VAL A 349      56.910 -27.780  60.040  1.00  0.00           H
ATOM    760 3HG1 VAL A 349      58.190 -28.730  59.300  1.00  0.00           H
ATOM    761  CG2 VAL A 349      59.290 -26.300  59.990  1.00  0.00           C
ATOM    762 1HG2 VAL A 349      58.480 -25.650  59.650  1.00  0.00           H
ATOM    763 2HG2 VAL A 349      60.020 -25.660  60.500  1.00  0.00           H
ATOM    764 3HG2 VAL A 349      59.880 -26.650  59.150  1.00  0.00           H
ATOM    765  C   VAL A 349      56.950 -26.200  62.210  1.00  0.00           C
ATOM    766  O   VAL A 349      55.990 -26.920  62.320  1.00  0.00           O
ATOM    767  N   LYS A 350      56.930 -24.900  62.110  1.00  0.00           N
ATOM    768  H   LYS A 350      57.750 -24.330  61.930  1.00  0.00           H
ATOM    769  CA  LYS A 350      55.700 -24.090  62.260  1.00  0.00           C
ATOM    770  HA  LYS A 350      54.980 -24.730  61.740  1.00  0.00           H
ATOM    771  CB  LYS A 350      55.380 -23.750  63.730  1.00  0.00           C
ATOM    772  HB1 LYS A 350      55.180 -24.640  64.320  1.00  0.00           H
ATOM    773  HB2 LYS A 350      54.400 -23.270  63.690  1.00  0.00           H
ATOM    774  CG  LYS A 350      56.290 -22.760  64.450  1.00  0.00           C
ATOM    775  HG1 LYS A 350      56.350 -21.960  63.710  1.00  0.00           H
ATOM    776  HG2 LYS A 350      57.300 -23.180  64.430  1.00  0.00           H
ATOM    777  CD  LYS A 350      55.910 -22.190  65.790  1.00  0.00           C
ATOM    778  HD1 LYS A 350      55.760 -23.050  66.450  1.00  0.00           H
ATOM    779  HD2 LYS A 350      55.000 -21.600  65.900  1.00  0.00           H
ATOM    780  CE  LYS A 350      57.140 -21.440  66.310  1.00  0.00           C
ATOM    781  HE1 LYS A 350      57.550 -20.710  65.610  1.00  0.00           H
ATOM    782  HE2 LYS A 350      57.960 -22.160  66.330  1.00  0.00           H
ATOM    783  NZ  LYS A 350      56.970 -20.910  67.710  1.00  0.00           N
ATOM    784  HZ1 LYS A 350      56.960 -21.600  68.450  1.00  0.00           H
ATOM    785  HZ2 LYS A 350      57.670 -20.220  67.930  1.00  0.00           H
ATOM    786  HZ3 LYS A 350      56.150 -20.320  67.710  1.00  0.00           H
ATOM    787  C   LYS A 350      55.730 -22.800  61.430  1.00  0.00           C
ATOM    788  O   LYS A 350      56.840 -22.360  61.060  1.00  0.00           O
ATOM    789  N   LYS A 351      54.560 -22.260  61.070  1.00  0.00           N
ATOM    790  H   LYS A 351      53.680 -22.610  61.420  1.00  0.00           H
ATOM    791  CA  LYS A 351      54.460 -21.190  60.070  1.00  0.00           C
ATOM    792  HA  LYS A 351      55.450 -20.820  59.780  1.00  0.00           H
ATOM    793  CB  LYS A 351      53.930 -21.750  58.680  1.00  0.00           C
ATOM    794  HB1 LYS A 351      54.250 -22.790  58.560  1.00  0.00           H
ATOM    795  HB2 LYS A 351      54.260 -21.070  57.900  1.00  0.00           H
ATOM    796  CG  LYS A 351      52.420 -21.770  58.540  1.00  0.00           C
ATOM    797  HG1 LYS A 351      52.050 -20.750  58.520  1.00  0.00           H
ATOM    798  HG2 LYS A 351      52.000 -22.300  59.400  1.00  0.00           H
ATOM    799  CD  LYS A 351      52.110 -22.570  57.270  1.00  0.00           C
ATOM    800  HD1 LYS A 351      52.390 -23.600  57.510  1.00  0.00           H
ATOM    801  HD2 LYS A 351      52.770 -22.260  56.450  1.00  0.00           H
ATOM    802  CE  LYS A 351      50.620 -22.260  56.900  1.00  0.00           C
ATOM    803  HE1 LYS A 351      50.460 -21.210  57.130  1.00  0.00           H
ATOM    804  HE2 LYS A 351      49.990 -22.990  57.400  1.00  0.00           H
ATOM    805  NZ  LYS A 351      50.460 -22.320  55.420  1.00  0.00           N
ATOM    806  HZ1 LYS A 351      50.470 -23.260  55.050  1.00  0.00           H
ATOM    807  HZ2 LYS A 351      49.620 -21.860  55.120  1.00  0.00           H
ATOM    808  HZ3 LYS A 351      51.210 -21.850  54.940  1.00  0.00           H
ATOM    809  C   LYS A 351      53.660 -19.940  60.550  1.00  0.00           C
ATOM    810  O   LYS A 351      52.910 -20.060  61.480  1.00  0.00           O
ATOM    811  N   MET A 352      53.590 -18.880  59.730  1.00  0.00           N
ATOM    812  H   MET A 352      54.250 -18.960  58.970  1.00  0.00           H
ATOM    813  CA  MET A 352      52.880 -17.630  60.080  1.00  0.00           C
ATOM    814  HA  MET A 352      51.980 -17.970  60.580  1.00  0.00           H
ATOM    815  CB  MET A 352      53.830 -16.840  61.020  1.00  0.00           C
ATOM    816  HB1 MET A 352      54.830 -16.760  60.600  1.00  0.00           H
ATOM    817  HB2 MET A 352      53.930 -17.380  61.960  1.00  0.00           H
ATOM    818  CG  MET A 352      53.170 -15.520  61.340  1.00  0.00           C
ATOM    819  HG1 MET A 352      52.170 -15.830  61.650  1.00  0.00           H
ATOM    820  HG2 MET A 352      53.190 -14.950  60.410  1.00  0.00           H
ATOM    821  SD  MET A 352      54.010 -14.580  62.630  1.00  0.00           S
ATOM    822  CE  MET A 352      55.470 -13.990  61.770  1.00  0.00           C
ATOM    823  HE1 MET A 352      56.120 -14.780  61.380  1.00  0.00           H
ATOM    824  HE2 MET A 352      55.260 -13.190  61.060  1.00  0.00           H
ATOM    825  HE3 MET A 352      56.180 -13.510  62.440  1.00  0.00           H
ATOM    826  C   MET A 352      52.580 -16.890  58.740  1.00  0.00           C
ATOM    827  O   MET A 352      53.480 -16.810  57.910  1.00  0.00           O
ATOM    828  N   ASP A 353      51.410 -16.260  58.590  1.00  0.00           N
ATOM    829  H   ASP A 353      50.750 -16.280  59.350  1.00  0.00           H
ATOM    830  CA  ASP A 353      51.050 -15.480  57.410  1.00  0.00           C
ATOM    831  HA  ASP A 353      51.540 -15.880  56.520  1.00  0.00           H
ATOM    832  CB  ASP A 353      49.540 -15.510  57.350  1.00  0.00           C
ATOM    833  HB1 ASP A 353      49.130 -15.070  58.250  1.00  0.00           H
ATOM    834  HB2 ASP A 353      49.260 -16.560  57.260  1.00  0.00           H
ATOM    835  CG  ASP A 353      48.880 -14.810  56.160  1.00  0.00           C
ATOM    836  OD1 ASP A 353      49.560 -13.970  55.520  1.00  0.00           O
ATOM    837  OD2 ASP A 353      47.740 -15.090  55.690  1.00  0.00           O
ATOM    838  C   ASP A 353      51.660 -14.060  57.590  1.00  0.00           C
ATOM    839  O   ASP A 353      51.620 -13.510  58.700  1.00  0.00           O
ATOM    840  N   LEU A 354      52.350 -13.630  56.580  1.00  0.00           N
ATOM    841  H   LEU A 354      52.520 -14.260  55.810  1.00  0.00           H
ATOM    842  CA  LEU A 354      52.900 -12.320  56.620  1.00  0.00           C
ATOM    843  HA  LEU A 354      53.160 -12.140  57.660  1.00  0.00           H
ATOM    844  CB  LEU A 354      54.120 -12.270  55.680  1.00  0.00           C
ATOM    845  HB1 LEU A 354      54.430 -11.220  55.640  1.00  0.00           H
ATOM    846  HB2 LEU A 354      53.890 -12.340  54.620  1.00  0.00           H
ATOM    847  CG  LEU A 354      55.310 -13.150  56.130  1.00  0.00           C
ATOM    848  HG  LEU A 354      55.090 -14.210  56.060  1.00  0.00           H
ATOM    849  CD1 LEU A 354      56.630 -12.870  55.240  1.00  0.00           C
ATOM    850 1HD1 LEU A 354      56.540 -13.250  54.220  1.00  0.00           H
ATOM    851 2HD1 LEU A 354      56.810 -11.800  55.250  1.00  0.00           H
ATOM    852 3HD1 LEU A 354      57.490 -13.400  55.670  1.00  0.00           H
ATOM    853  CD2 LEU A 354      55.690 -12.930  57.600  1.00  0.00           C
ATOM    854 1HD2 LEU A 354      56.110 -11.940  57.770  1.00  0.00           H
ATOM    855 2HD2 LEU A 354      54.820 -13.100  58.240  1.00  0.00           H
ATOM    856 3HD2 LEU A 354      56.410 -13.690  57.900  1.00  0.00           H
ATOM    857  C   LEU A 354      51.930 -11.180  56.280  1.00  0.00           C
ATOM    858  O   LEU A 354      52.350 -10.040  56.470  1.00  0.00           O
ATOM    859  N   ARG A 355      50.730 -11.480  55.680  1.00  0.00           N
ATOM    860  H   ARG A 355      50.470 -12.460  55.670  1.00  0.00           H
ATOM    861  CA  ARG A 355      49.850 -10.420  55.150  1.00  0.00           C
ATOM    862  HA  ARG A 355      50.530  -9.710  54.670  1.00  0.00           H
ATOM    863  CB  ARG A 355      48.780 -11.020  54.140  1.00  0.00           C
ATOM    864  HB1 ARG A 355      48.120 -10.250  53.740  1.00  0.00           H
ATOM    865  HB2 ARG A 355      48.210 -11.780  54.680  1.00  0.00           H
ATOM    866  CG  ARG A 355      49.520 -11.650  53.000  1.00  0.00           C
ATOM    867  HG1 ARG A 355      50.250 -12.350  53.410  1.00  0.00           H
ATOM    868  HG2 ARG A 355      49.940 -10.910  52.320  1.00  0.00           H
ATOM    869  CD  ARG A 355      48.510 -12.450  52.120  1.00  0.00           C
ATOM    870  HD1 ARG A 355      49.150 -12.860  51.330  1.00  0.00           H
ATOM    871  HD2 ARG A 355      47.750 -11.770  51.730  1.00  0.00           H
ATOM    872  NE  ARG A 355      47.970 -13.620  52.830  1.00  0.00           N
ATOM    873  HE  ARG A 355      48.090 -13.680  53.830  1.00  0.00           H
ATOM    874  CZ  ARG A 355      47.320 -14.610  52.190  1.00  0.00           C
ATOM    875  NH1 ARG A 355      46.940 -15.620  52.910  1.00  0.00           N
ATOM    876 1HH1 ARG A 355      47.200 -15.620  53.890  1.00  0.00           H
ATOM    877 2HH1 ARG A 355      46.610 -16.460  52.460  1.00  0.00           H
ATOM    878  NH2 ARG A 355      47.170 -14.630  50.910  1.00  0.00           N
ATOM    879 1HH2 ARG A 355      47.690 -14.010  50.300  1.00  0.00           H
ATOM    880 2HH2 ARG A 355      46.600 -15.320  50.440  1.00  0.00           H
ATOM    881  C   ARG A 355      49.150  -9.590  56.240  1.00  0.00           C
ATOM    882  O   ARG A 355      48.980  -8.410  56.100  1.00  0.00           O
ATOM    883  N   LYS A 356      48.770 -10.200  57.310  1.00  0.00           N
ATOM    884  H   LYS A 356      49.060 -11.160  57.450  1.00  0.00           H
ATOM    885  CA  LYS A 356      47.820  -9.780  58.280  1.00  0.00           C
ATOM    886  HA  LYS A 356      46.900  -9.500  57.770  1.00  0.00           H
ATOM    887  CB  LYS A 356      47.510 -10.940  59.240  1.00  0.00           C
ATOM    888  HB1 LYS A 356      46.780 -10.580  59.960  1.00  0.00           H
ATOM    889  HB2 LYS A 356      48.450 -11.160  59.750  1.00  0.00           H
ATOM    890  CG  LYS A 356      47.030 -12.170  58.490  1.00  0.00           C
ATOM    891  HG1 LYS A 356      47.860 -12.840  58.310  1.00  0.00           H
ATOM    892  HG2 LYS A 356      46.500 -11.940  57.570  1.00  0.00           H
ATOM    893  CD  LYS A 356      45.980 -12.990  59.260  1.00  0.00           C
ATOM    894  HD1 LYS A 356      45.100 -12.420  59.580  1.00  0.00           H
ATOM    895  HD2 LYS A 356      46.470 -13.440  60.120  1.00  0.00           H
ATOM    896  CE  LYS A 356      45.530 -14.120  58.310  1.00  0.00           C
ATOM    897  HE1 LYS A 356      46.420 -14.590  57.890  1.00  0.00           H
ATOM    898  HE2 LYS A 356      44.990 -13.760  57.430  1.00  0.00           H
ATOM    899  NZ  LYS A 356      44.630 -15.100  58.940  1.00  0.00           N
ATOM    900  HZ1 LYS A 356      44.270 -15.780  58.280  1.00  0.00           H
ATOM    901  HZ2 LYS A 356      45.150 -15.650  59.610  1.00  0.00           H
ATOM    902  HZ3 LYS A 356      43.890 -14.600  59.410  1.00  0.00           H
ATOM    903  C   LYS A 356      48.270  -8.610  59.120  1.00  0.00           C
ATOM    904  O   LYS A 356      47.420  -7.730  59.370  1.00  0.00           O
ATOM    905  N   GLN A 357      49.560  -8.580  59.450  1.00  0.00           N
ATOM    906  H   GLN A 357      50.080  -9.420  59.240  1.00  0.00           H
ATOM    907  CA  GLN A 357      50.210  -7.490  60.210  1.00  0.00           C
ATOM    908  HA  GLN A 357      49.440  -6.880  60.680  1.00  0.00           H
ATOM    909  CB  GLN A 357      50.880  -8.220  61.420  1.00  0.00           C
ATOM    910  HB1 GLN A 357      51.520  -7.470  61.880  1.00  0.00           H
ATOM    911  HB2 GLN A 357      51.690  -8.890  61.110  1.00  0.00           H
ATOM    912  CG  GLN A 357      49.870  -8.880  62.430  1.00  0.00           C
ATOM    913  HG1 GLN A 357      50.450  -9.240  63.280  1.00  0.00           H
ATOM    914  HG2 GLN A 357      49.480  -9.770  61.940  1.00  0.00           H
ATOM    915  CD  GLN A 357      48.780  -7.970  63.030  1.00  0.00           C
ATOM    916  OE1 GLN A 357      49.150  -6.920  63.590  1.00  0.00           O
ATOM    917  NE2 GLN A 357      47.510  -8.330  62.940  1.00  0.00           N
ATOM    918 1HE2 GLN A 357      47.230  -9.200  62.510  1.00  0.00           H
ATOM    919 2HE2 GLN A 357      46.910  -7.890  63.620  1.00  0.00           H
ATOM    920  C   GLN A 357      51.190  -6.580  59.420  1.00  0.00           C
ATOM    921  O   GLN A 357      51.660  -6.920  58.330  1.00  0.00           O
ATOM    922  N   GLN A 358      51.340  -5.320  60.000  1.00  0.00           N
ATOM    923  H   GLN A 358      50.860  -5.050  60.850  1.00  0.00           H
ATOM    924  CA  GLN A 358      51.960  -4.270  59.170  1.00  0.00           C
ATOM    925  HA  GLN A 358      52.330  -4.710  58.250  1.00  0.00           H
ATOM    926  CB  GLN A 358      50.870  -3.200  58.880  1.00  0.00           C
ATOM    927  HB1 GLN A 358      51.330  -2.650  58.060  1.00  0.00           H
ATOM    928  HB2 GLN A 358      50.820  -2.510  59.730  1.00  0.00           H
ATOM    929  CG  GLN A 358      49.390  -3.640  58.580  1.00  0.00           C
ATOM    930  HG1 GLN A 358      48.860  -2.690  58.470  1.00  0.00           H
ATOM    931  HG2 GLN A 358      48.940  -4.020  59.490  1.00  0.00           H
ATOM    932  CD  GLN A 358      49.300  -4.630  57.430  1.00  0.00           C
ATOM    933  OE1 GLN A 358      50.090  -4.520  56.500  1.00  0.00           O
ATOM    934  NE2 GLN A 358      48.480  -5.650  57.440  1.00  0.00           N
ATOM    935 1HE2 GLN A 358      47.950  -5.790  58.290  1.00  0.00           H
ATOM    936 2HE2 GLN A 358      48.420  -6.370  56.730  1.00  0.00           H
ATOM    937  C   GLN A 358      53.160  -3.700  59.890  1.00  0.00           C
ATOM    938  O   GLN A 358      54.090  -3.160  59.320  1.00  0.00           O
ATOM    939  N   ARG A 359      53.280  -3.640  61.220  1.00  0.00           N
ATOM    940  H   ARG A 359      52.520  -4.020  61.770  1.00  0.00           H
ATOM    941  CA  ARG A 359      54.440  -3.130  61.970  1.00  0.00           C
ATOM    942  HA  ARG A 359      54.820  -2.220  61.520  1.00  0.00           H
ATOM    943  CB  ARG A 359      54.020  -2.830  63.430  1.00  0.00           C
ATOM    944  HB1 ARG A 359      53.050  -2.330  63.380  1.00  0.00           H
ATOM    945  HB2 ARG A 359      54.760  -2.210  63.940  1.00  0.00           H
ATOM    946  CG  ARG A 359      53.710  -4.020  64.280  1.00  0.00           C
ATOM    947  HG1 ARG A 359      54.610  -4.630  64.310  1.00  0.00           H
ATOM    948  HG2 ARG A 359      52.890  -4.540  63.790  1.00  0.00           H
ATOM    949  CD  ARG A 359      53.340  -3.590  65.660  1.00  0.00           C
ATOM    950  HD1 ARG A 359      54.140  -2.950  66.050  1.00  0.00           H
ATOM    951  HD2 ARG A 359      53.190  -4.480  66.270  1.00  0.00           H
ATOM    952  NE  ARG A 359      51.990  -3.050  65.640  1.00  0.00           N
ATOM    953  HE  ARG A 359      51.240  -3.710  65.480  1.00  0.00           H
ATOM    954  CZ  ARG A 359      51.610  -1.720  65.660  1.00  0.00           C
ATOM    955  NH1 ARG A 359      50.360  -1.380  65.550  1.00  0.00           N
ATOM    956 1HH1 ARG A 359      49.660  -2.100  65.490  1.00  0.00           H
ATOM    957 2HH1 ARG A 359      49.980  -0.440  65.590  1.00  0.00           H
ATOM    958  NH2 ARG A 359      52.520  -0.770  65.670  1.00  0.00           N
ATOM    959 1HH2 ARG A 359      53.500  -1.010  65.750  1.00  0.00           H
ATOM    960 2HH2 ARG A 359      52.250   0.170  65.390  1.00  0.00           H
ATOM    961  C   ARG A 359      55.570  -4.160  61.980  1.00  0.00           C
ATOM    962  O   ARG A 359      55.170  -5.340  62.100  1.00  0.00           O
ATOM    963  N   ARG A 360      56.810  -3.750  61.980  1.00  0.00           N
ATOM    964  H   ARG A 360      56.950  -2.760  62.130  1.00  0.00           H
ATOM    965  CA  ARG A 360      57.880  -4.710  61.930  1.00  0.00           C
ATOM    966  HA  ARG A 360      57.670  -5.360  61.080  1.00  0.00           H
ATOM    967  CB  ARG A 360      59.210  -4.080  61.560  1.00  0.00           C
ATOM    968  HB1 ARG A 360      59.940  -4.870  61.390  1.00  0.00           H
ATOM    969  HB2 ARG A 360      59.600  -3.530  62.420  1.00  0.00           H
ATOM    970  CG  ARG A 360      59.190  -3.350  60.270  1.00  0.00           C
ATOM    971  HG1 ARG A 360      58.390  -2.600  60.240  1.00  0.00           H
ATOM    972  HG2 ARG A 360      59.080  -4.080  59.470  1.00  0.00           H
ATOM    973  CD  ARG A 360      60.490  -2.630  59.970  1.00  0.00           C
ATOM    974  HD1 ARG A 360      61.320  -3.330  60.090  1.00  0.00           H
ATOM    975  HD2 ARG A 360      60.570  -1.790  60.660  1.00  0.00           H
ATOM    976  NE  ARG A 360      60.520  -2.010  58.600  1.00  0.00           N
ATOM    977  HE  ARG A 360      59.880  -1.270  58.360  1.00  0.00           H
ATOM    978  CZ  ARG A 360      61.190  -2.420  57.530  1.00  0.00           C
ATOM    979  NH1 ARG A 360      62.110  -3.350  57.640  1.00  0.00           N
ATOM    980 1HH1 ARG A 360      62.350  -3.720  58.550  1.00  0.00           H
ATOM    981 2HH1 ARG A 360      62.830  -3.310  56.930  1.00  0.00           H
ATOM    982  NH2 ARG A 360      60.900  -1.940  56.380  1.00  0.00           N
ATOM    983 1HH2 ARG A 360      60.360  -1.110  56.210  1.00  0.00           H
ATOM    984 2HH2 ARG A 360      61.500  -2.170  55.600  1.00  0.00           H
ATOM    985  C   ARG A 360      57.980  -5.650  63.090  1.00  0.00           C
ATOM    986  O   ARG A 360      58.330  -6.830  62.910  1.00  0.00           O
ATOM    987  N   GLU A 361      57.620  -5.180  64.260  1.00  0.00           N
ATOM    988  H   GLU A 361      57.400  -4.190  64.240  1.00  0.00           H
ATOM    989  CA  GLU A 361      57.610  -5.940  65.540  1.00  0.00           C
ATOM    990  HA  GLU A 361      58.480  -6.600  65.500  1.00  0.00           H
ATOM    991  CB  GLU A 361      57.790  -4.940  66.760  1.00  0.00           C
ATOM    992  HB1 GLU A 361      58.620  -4.250  66.610  1.00  0.00           H
ATOM    993  HB2 GLU A 361      58.060  -5.580  67.600  1.00  0.00           H
ATOM    994  CG  GLU A 361      56.470  -4.290  67.120  1.00  0.00           C
ATOM    995  HG1 GLU A 361      55.640  -4.900  66.760  1.00  0.00           H
ATOM    996  HG2 GLU A 361      56.530  -3.380  66.510  1.00  0.00           H
ATOM    997  CD  GLU A 361      56.390  -4.060  68.640  1.00  0.00           C
ATOM    998  OE1 GLU A 361      55.640  -4.850  69.280  1.00  0.00           O
ATOM    999  OE2 GLU A 361      56.870  -3.040  69.150  1.00  0.00           O
ATOM   1000  C   GLU A 361      56.510  -6.970  65.740  1.00  0.00           C
ATOM   1001  O   GLU A 361      56.360  -7.590  66.770  1.00  0.00           O
ATOM   1002  N   LEU A 362      55.690  -7.230  64.730  1.00  0.00           N
ATOM   1003  H   LEU A 362      55.730  -6.660  63.890  1.00  0.00           H
ATOM   1004  CA  LEU A 362      54.730  -8.310  64.660  1.00  0.00           C
ATOM   1005  HA  LEU A 362      55.060  -9.130  65.310  1.00  0.00           H
ATOM   1006  CB  LEU A 362      53.290  -7.860  65.150  1.00  0.00           C
ATOM   1007  HB1 LEU A 362      52.570  -8.580  64.760  1.00  0.00           H
ATOM   1008  HB2 LEU A 362      53.030  -6.960  64.590  1.00  0.00           H
ATOM   1009  CG  LEU A 362      53.130  -7.630  66.650  1.00  0.00           C
ATOM   1010  HG  LEU A 362      53.810  -6.860  67.010  1.00  0.00           H
ATOM   1011  CD1 LEU A 362      51.650  -7.210  67.040  1.00  0.00           C
ATOM   1012 1HD1 LEU A 362      50.920  -7.960  66.740  1.00  0.00           H
ATOM   1013 2HD1 LEU A 362      51.690  -6.950  68.100  1.00  0.00           H
ATOM   1014 3HD1 LEU A 362      51.370  -6.370  66.400  1.00  0.00           H
ATOM   1015  CD2 LEU A 362      53.300  -8.830  67.580  1.00  0.00           C
ATOM   1016 1HD2 LEU A 362      54.330  -9.190  67.550  1.00  0.00           H
ATOM   1017 2HD2 LEU A 362      53.220  -8.590  68.640  1.00  0.00           H
ATOM   1018 3HD2 LEU A 362      52.620  -9.590  67.210  1.00  0.00           H
ATOM   1019  C   LEU A 362      54.650  -8.850  63.230  1.00  0.00           C
ATOM   1020  O   LEU A 362      53.590  -9.190  62.690  1.00  0.00           O
ATOM   1021  N   LEU A 363      55.860  -8.950  62.680  1.00  0.00           N
ATOM   1022  H   LEU A 363      56.620  -8.620  63.250  1.00  0.00           H
ATOM   1023  CA  LEU A 363      56.270  -9.670  61.480  1.00  0.00           C
ATOM   1024  HA  LEU A 363      55.510 -10.390  61.190  1.00  0.00           H
ATOM   1025  CB  LEU A 363      56.430  -8.740  60.240  1.00  0.00           C
ATOM   1026  HB1 LEU A 363      57.020  -9.250  59.480  1.00  0.00           H
ATOM   1027  HB2 LEU A 363      57.010  -7.850  60.490  1.00  0.00           H
ATOM   1028  CG  LEU A 363      55.080  -8.210  59.630  1.00  0.00           C
ATOM   1029  HG  LEU A 363      54.300  -8.010  60.370  1.00  0.00           H
ATOM   1030  CD1 LEU A 363      55.370  -6.950  58.800  1.00  0.00           C
ATOM   1031 1HD1 LEU A 363      56.060  -7.210  57.990  1.00  0.00           H
ATOM   1032 2HD1 LEU A 363      54.450  -6.560  58.360  1.00  0.00           H
ATOM   1033 3HD1 LEU A 363      55.870  -6.210  59.410  1.00  0.00           H
ATOM   1034  CD2 LEU A 363      54.590  -9.240  58.600  1.00  0.00           C
ATOM   1035 1HD2 LEU A 363      53.630  -8.930  58.180  1.00  0.00           H
ATOM   1036 2HD2 LEU A 363      55.280  -9.310  57.760  1.00  0.00           H
ATOM   1037 3HD2 LEU A 363      54.410 -10.220  59.030  1.00  0.00           H
ATOM   1038  C   LEU A 363      57.690 -10.350  61.550  1.00  0.00           C
ATOM   1039  O   LEU A 363      57.960 -11.420  61.030  1.00  0.00           O
ATOM   1040  N   PHE A 364      58.580  -9.620  62.180  1.00  0.00           N
ATOM   1041  H   PHE A 364      58.260  -8.710  62.470  1.00  0.00           H
ATOM   1042  CA  PHE A 364      60.010  -9.970  62.380  1.00  0.00           C
ATOM   1043  HA  PHE A 364      60.090 -10.930  61.870  1.00  0.00           H
ATOM   1044  CB  PHE A 364      60.950  -8.870  61.970  1.00  0.00           C
ATOM   1045  HB1 PHE A 364      61.960  -9.090  62.330  1.00  0.00           H
ATOM   1046  HB2 PHE A 364      60.660  -7.960  62.500  1.00  0.00           H
ATOM   1047  CG  PHE A 364      61.040  -8.480  60.520  1.00  0.00           C
ATOM   1048  CD1 PHE A 364      60.100  -7.580  59.990  1.00  0.00           C
ATOM   1049  HD1 PHE A 364      59.290  -7.210  60.590  1.00  0.00           H
ATOM   1050  CE1 PHE A 364      60.210  -7.140  58.650  1.00  0.00           C
ATOM   1051  HE1 PHE A 364      59.460  -6.450  58.310  1.00  0.00           H
ATOM   1052  CZ  PHE A 364      61.320  -7.480  57.800  1.00  0.00           C
ATOM   1053  HZ  PHE A 364      61.430  -7.060  56.810  1.00  0.00           H
ATOM   1054  CE2 PHE A 364      62.230  -8.440  58.280  1.00  0.00           C
ATOM   1055  HE2 PHE A 364      63.010  -8.840  57.650  1.00  0.00           H
ATOM   1056  CD2 PHE A 364      62.160  -8.850  59.690  1.00  0.00           C
ATOM   1057  HD2 PHE A 364      62.910  -9.480  60.150  1.00  0.00           H
ATOM   1058  C   PHE A 364      60.180 -10.200  63.870  1.00  0.00           C
ATOM   1059  O   PHE A 364      60.320  -9.280  64.660  1.00  0.00           O
ATOM   1060  N   ASN A 365      60.090 -11.430  64.320  1.00  0.00           N
ATOM   1061  H   ASN A 365      59.760 -12.110  63.660  1.00  0.00           H
ATOM   1062  CA  ASN A 365      60.100 -11.960  65.660  1.00  0.00           C
ATOM   1063  HA  ASN A 365      60.440 -11.200  66.360  1.00  0.00           H
ATOM   1064  CB  ASN A 365      58.620 -12.220  66.030  1.00  0.00           C
ATOM   1065  HB1 ASN A 365      58.410 -12.700  66.980  1.00  0.00           H
ATOM   1066  HB2 ASN A 365      58.120 -12.870  65.310  1.00  0.00           H
ATOM   1067  CG  ASN A 365      57.760 -11.060  65.850  1.00  0.00           C
ATOM   1068  OD1 ASN A 365      56.930 -10.940  64.950  1.00  0.00           O
ATOM   1069  ND2 ASN A 365      57.640 -10.310  66.880  1.00  0.00           N
ATOM   1070 1HD2 ASN A 365      58.310 -10.480  67.610  1.00  0.00           H
ATOM   1071 2HD2 ASN A 365      56.980  -9.550  66.940  1.00  0.00           H
ATOM   1072  C   ASN A 365      61.180 -13.050  65.770  1.00  0.00           C
ATOM   1073  O   ASN A 365      62.360 -12.830  66.020  1.00  0.00           O
ATOM   1074  N   GLU A 366      60.840 -14.320  65.690  1.00  0.00           N
ATOM   1075  H   GLU A 366      59.950 -14.640  65.320  1.00  0.00           H
ATOM   1076  CA  GLU A 366      61.750 -15.450  66.160  1.00  0.00           C
ATOM   1077  HA  GLU A 366      61.900 -15.270  67.220  1.00  0.00           H
ATOM   1078  CB  GLU A 366      60.990 -16.710  66.110  1.00  0.00           C
ATOM   1079  HB1 GLU A 366      61.620 -17.510  66.510  1.00  0.00           H
ATOM   1080  HB2 GLU A 366      60.770 -16.920  65.060  1.00  0.00           H
ATOM   1081  CG  GLU A 366      59.710 -16.780  66.950  1.00  0.00           C
ATOM   1082  HG1 GLU A 366      58.970 -16.050  66.620  1.00  0.00           H
ATOM   1083  HG2 GLU A 366      59.930 -16.700  68.010  1.00  0.00           H
ATOM   1084  CD  GLU A 366      59.020 -18.170  66.750  1.00  0.00           C
ATOM   1085  OE1 GLU A 366      59.400 -19.200  67.370  1.00  0.00           O
ATOM   1086  OE2 GLU A 366      58.070 -18.240  65.920  1.00  0.00           O
ATOM   1087  C   GLU A 366      63.100 -15.500  65.320  1.00  0.00           C
ATOM   1088  O   GLU A 366      64.150 -15.790  65.850  1.00  0.00           O
ATOM   1089  N   VAL A 367      63.020 -14.990  64.080  1.00  0.00           N
ATOM   1090  H   VAL A 367      62.120 -14.620  63.800  1.00  0.00           H
ATOM   1091  CA  VAL A 367      64.120 -15.130  63.110  1.00  0.00           C
ATOM   1092  HA  VAL A 367      64.560 -16.090  63.370  1.00  0.00           H
ATOM   1093  CB  VAL A 367      63.650 -15.160  61.670  1.00  0.00           C
ATOM   1094  HB  VAL A 367      64.540 -15.280  61.050  1.00  0.00           H
ATOM   1095  CG1 VAL A 367      62.740 -16.410  61.420  1.00  0.00           C
ATOM   1096 1HG1 VAL A 367      63.270 -17.350  61.590  1.00  0.00           H
ATOM   1097 2HG1 VAL A 367      61.900 -16.490  62.110  1.00  0.00           H
ATOM   1098 3HG1 VAL A 367      62.400 -16.470  60.390  1.00  0.00           H
ATOM   1099  CG2 VAL A 367      62.980 -13.880  61.290  1.00  0.00           C
ATOM   1100 1HG2 VAL A 367      62.110 -13.740  61.930  1.00  0.00           H
ATOM   1101 2HG2 VAL A 367      63.700 -13.060  61.340  1.00  0.00           H
ATOM   1102 3HG2 VAL A 367      62.810 -13.900  60.210  1.00  0.00           H
ATOM   1103  C   VAL A 367      65.210 -14.070  63.320  1.00  0.00           C
ATOM   1104  O   VAL A 367      66.350 -14.190  62.850  1.00  0.00           O
ATOM   1105  N   VAL A 368      64.860 -12.960  64.080  1.00  0.00           N
ATOM   1106  H   VAL A 368      63.930 -12.850  64.460  1.00  0.00           H
ATOM   1107  CA  VAL A 368      65.750 -11.880  64.580  1.00  0.00           C
ATOM   1108  HA  VAL A 368      66.740 -12.060  64.170  1.00  0.00           H
ATOM   1109  CB  VAL A 368      65.480 -10.470  64.050  1.00  0.00           C
ATOM   1110  HB  VAL A 368      66.230  -9.830  64.500  1.00  0.00           H
ATOM   1111  CG1 VAL A 368      65.650 -10.510  62.520  1.00  0.00           C
ATOM   1112 1HG1 VAL A 368      65.470  -9.530  62.070  1.00  0.00           H
ATOM   1113 2HG1 VAL A 368      66.710 -10.720  62.400  1.00  0.00           H
ATOM   1114 3HG1 VAL A 368      65.010 -11.240  62.020  1.00  0.00           H
ATOM   1115  CG2 VAL A 368      64.030 -10.020  64.350  1.00  0.00           C
ATOM   1116 1HG2 VAL A 368      63.900  -9.110  63.770  1.00  0.00           H
ATOM   1117 2HG2 VAL A 368      63.300 -10.740  63.980  1.00  0.00           H
ATOM   1118 3HG2 VAL A 368      63.900  -9.830  65.420  1.00  0.00           H
ATOM   1119  C   VAL A 368      66.050 -11.840  66.100  1.00  0.00           C
ATOM   1120  O   VAL A 368      67.120 -11.380  66.530  1.00  0.00           O
ATOM   1121  N   ILE A 369      65.370 -12.630  66.840  1.00  0.00           N
ATOM   1122  H   ILE A 369      64.540 -12.960  66.370  1.00  0.00           H
ATOM   1123  CA  ILE A 369      65.420 -12.670  68.350  1.00  0.00           C
ATOM   1124  HA  ILE A 369      66.240 -12.040  68.710  1.00  0.00           H
ATOM   1125  CB  ILE A 369      64.090 -12.130  68.920  1.00  0.00           C
ATOM   1126  HB  ILE A 369      63.280 -12.690  68.460  1.00  0.00           H
ATOM   1127  CG2 ILE A 369      63.820 -12.280  70.470  1.00  0.00           C
ATOM   1128 1HG2 ILE A 369      62.930 -11.760  70.810  1.00  0.00           H
ATOM   1129 2HG2 ILE A 369      63.750 -13.350  70.640  1.00  0.00           H
ATOM   1130 3HG2 ILE A 369      64.690 -11.890  71.010  1.00  0.00           H
ATOM   1131  CG1 ILE A 369      63.960 -10.590  68.500  1.00  0.00           C
ATOM   1132 1HG1 ILE A 369      63.010 -10.270  68.930  1.00  0.00           H
ATOM   1133 2HG1 ILE A 369      63.940 -10.600  67.410  1.00  0.00           H
ATOM   1134  CD  ILE A 369      65.060  -9.630  68.970  1.00  0.00           C
ATOM   1135  HD1 ILE A 369      66.050  -9.830  68.550  1.00  0.00           H
ATOM   1136  HD2 ILE A 369      64.960  -8.570  68.750  1.00  0.00           H
ATOM   1137  HD3 ILE A 369      65.120  -9.690  70.060  1.00  0.00           H
ATOM   1138  C   ILE A 369      65.780 -14.110  68.860  1.00  0.00           C
ATOM   1139  O   ILE A 369      66.310 -14.170  69.930  1.00  0.00           O
ATOM   1140  N   MET A 370      65.450 -15.240  68.210  1.00  0.00           N
ATOM   1141  H   MET A 370      64.740 -15.120  67.500  1.00  0.00           H
ATOM   1142  CA  MET A 370      65.640 -16.580  68.760  1.00  0.00           C
ATOM   1143  HA  MET A 370      66.140 -16.590  69.730  1.00  0.00           H
ATOM   1144  CB  MET A 370      64.260 -17.230  68.890  1.00  0.00           C
ATOM   1145  HB1 MET A 370      64.450 -18.280  69.150  1.00  0.00           H
ATOM   1146  HB2 MET A 370      63.760 -17.180  67.930  1.00  0.00           H
ATOM   1147  CG  MET A 370      63.300 -16.650  69.970  1.00  0.00           C
ATOM   1148  HG1 MET A 370      62.440 -17.320  69.940  1.00  0.00           H
ATOM   1149  HG2 MET A 370      63.110 -15.640  69.620  1.00  0.00           H
ATOM   1150  SD  MET A 370      64.080 -16.620  71.650  1.00  0.00           S
ATOM   1151  CE  MET A 370      64.250 -18.360  72.000  1.00  0.00           C
ATOM   1152  HE1 MET A 370      64.970 -18.870  71.350  1.00  0.00           H
ATOM   1153  HE2 MET A 370      64.610 -18.570  73.000  1.00  0.00           H
ATOM   1154  HE3 MET A 370      63.300 -18.870  71.830  1.00  0.00           H
ATOM   1155  C   MET A 370      66.470 -17.550  67.970  1.00  0.00           C
ATOM   1156  O   MET A 370      67.040 -18.480  68.480  1.00  0.00           O
ATOM   1157  N   ARG A 371      66.600 -17.210  66.700  1.00  0.00           N
ATOM   1158  H   ARG A 371      66.030 -16.500  66.280  1.00  0.00           H
ATOM   1159  CA  ARG A 371      67.600 -17.750  65.850  1.00  0.00           C
ATOM   1160  HA  ARG A 371      67.400 -18.820  65.810  1.00  0.00           H
ATOM   1161  CB  ARG A 371      67.480 -17.120  64.440  1.00  0.00           C
ATOM   1162  HB1 ARG A 371      68.010 -16.160  64.410  1.00  0.00           H
ATOM   1163  HB2 ARG A 371      66.480 -16.890  64.080  1.00  0.00           H
ATOM   1164  CG  ARG A 371      68.060 -17.960  63.290  1.00  0.00           C
ATOM   1165  HG1 ARG A 371      67.260 -18.560  62.860  1.00  0.00           H
ATOM   1166  HG2 ARG A 371      68.950 -18.490  63.620  1.00  0.00           H
ATOM   1167  CD  ARG A 371      68.580 -17.140  62.110  1.00  0.00           C
ATOM   1168  HD1 ARG A 371      67.930 -16.280  61.950  1.00  0.00           H
ATOM   1169  HD2 ARG A 371      68.470 -17.740  61.210  1.00  0.00           H
ATOM   1170  NE  ARG A 371      70.000 -16.590  62.270  1.00  0.00           N
ATOM   1171  HE  ARG A 371      70.510 -16.560  63.140  1.00  0.00           H
ATOM   1172  CZ  ARG A 371      70.730 -16.170  61.260  1.00  0.00           C
ATOM   1173  NH1 ARG A 371      70.370 -16.190  60.030  1.00  0.00           N
ATOM   1174 1HH1 ARG A 371      69.410 -16.400  59.770  1.00  0.00           H
ATOM   1175 2HH1 ARG A 371      70.990 -15.790  59.340  1.00  0.00           H
ATOM   1176  NH2 ARG A 371      71.890 -15.660  61.480  1.00  0.00           N
ATOM   1177 1HH2 ARG A 371      72.310 -15.800  62.390  1.00  0.00           H
ATOM   1178 2HH2 ARG A 371      72.310 -15.150  60.710  1.00  0.00           H
ATOM   1179  C   ARG A 371      68.990 -17.520  66.490  1.00  0.00           C
ATOM   1180  O   ARG A 371      69.190 -16.480  67.130  1.00  0.00           O
ATOM   1181  N   ASP A 372      69.930 -18.540  66.360  1.00  0.00           N
ATOM   1182  H   ASP A 372      69.670 -19.390  65.870  1.00  0.00           H
ATOM   1183  CA  ASP A 372      71.270 -18.610  66.940  1.00  0.00           C
ATOM   1184  HA  ASP A 372      71.620 -19.580  66.580  1.00  0.00           H
ATOM   1185  CB  ASP A 372      72.210 -17.580  66.340  1.00  0.00           C
ATOM   1186  HB1 ASP A 372      73.210 -17.860  66.670  1.00  0.00           H
ATOM   1187  HB2 ASP A 372      72.030 -16.570  66.730  1.00  0.00           H
ATOM   1188  CG  ASP A 372      72.070 -17.430  64.900  1.00  0.00           C
ATOM   1189  OD1 ASP A 372      71.740 -16.350  64.480  1.00  0.00           O
ATOM   1190  OD2 ASP A 372      72.330 -18.370  64.080  1.00  0.00           O
ATOM   1191  C   ASP A 372      71.320 -18.660  68.490  1.00  0.00           C
ATOM   1192  O   ASP A 372      72.270 -19.270  69.060  1.00  0.00           O
ATOM   1193  N   TYR A 373      70.250 -18.140  69.170  1.00  0.00           N
ATOM   1194  H   TYR A 373      69.570 -17.660  68.610  1.00  0.00           H
ATOM   1195  CA  TYR A 373      70.110 -18.230  70.670  1.00  0.00           C
ATOM   1196  HA  TYR A 373      71.040 -17.780  71.010  1.00  0.00           H
ATOM   1197  CB  TYR A 373      68.860 -17.510  71.170  1.00  0.00           C
ATOM   1198  HB1 TYR A 373      67.990 -18.160  71.050  1.00  0.00           H
ATOM   1199  HB2 TYR A 373      68.770 -16.590  70.580  1.00  0.00           H
ATOM   1200  CG  TYR A 373      69.000 -17.260  72.690  1.00  0.00           C
ATOM   1201  CD1 TYR A 373      68.400 -18.150  73.560  1.00  0.00           C
ATOM   1202  HD1 TYR A 373      67.810 -19.000  73.260  1.00  0.00           H
ATOM   1203  CE1 TYR A 373      68.600 -17.980  74.930  1.00  0.00           C
ATOM   1204  HE1 TYR A 373      68.220 -18.670  75.670  1.00  0.00           H
ATOM   1205  CZ  TYR A 373      69.380 -16.940  75.450  1.00  0.00           C
ATOM   1206  OH  TYR A 373      69.670 -16.800  76.780  1.00  0.00           O
ATOM   1207  HH  TYR A 373      70.250 -16.040  76.910  1.00  0.00           H
ATOM   1208  CE2 TYR A 373      69.950 -16.090  74.530  1.00  0.00           C
ATOM   1209  HE2 TYR A 373      70.500 -15.250  74.920  1.00  0.00           H
ATOM   1210  CD2 TYR A 373      69.860 -16.220  73.150  1.00  0.00           C
ATOM   1211  HD2 TYR A 373      70.350 -15.490  72.530  1.00  0.00           H
ATOM   1212  C   TYR A 373      70.020 -19.700  71.090  1.00  0.00           C
ATOM   1213  O   TYR A 373      69.320 -20.510  70.510  1.00  0.00           O
ATOM   1214  N   GLN A 374      70.900 -20.090  72.080  1.00  0.00           N
ATOM   1215  H   GLN A 374      71.640 -19.450  72.330  1.00  0.00           H
ATOM   1216  CA  GLN A 374      70.740 -21.420  72.760  1.00  0.00           C
ATOM   1217  HA  GLN A 374      69.770 -21.910  72.680  1.00  0.00           H
ATOM   1218  CB  GLN A 374      71.780 -22.410  72.180  1.00  0.00           C
ATOM   1219  HB1 GLN A 374      71.700 -23.310  72.790  1.00  0.00           H
ATOM   1220  HB2 GLN A 374      72.760 -21.930  72.160  1.00  0.00           H
ATOM   1221  CG  GLN A 374      71.400 -22.840  70.700  1.00  0.00           C
ATOM   1222  HG1 GLN A 374      71.510 -22.000  70.010  1.00  0.00           H
ATOM   1223  HG2 GLN A 374      70.360 -23.180  70.650  1.00  0.00           H
ATOM   1224  CD  GLN A 374      72.280 -23.900  70.040  1.00  0.00           C
ATOM   1225  OE1 GLN A 374      73.250 -24.370  70.710  1.00  0.00           O
ATOM   1226  NE2 GLN A 374      71.930 -24.470  68.860  1.00  0.00           N
ATOM   1227 1HE2 GLN A 374      71.280 -24.100  68.180  1.00  0.00           H
ATOM   1228 2HE2 GLN A 374      72.420 -25.300  68.580  1.00  0.00           H
ATOM   1229  C   GLN A 374      70.950 -21.290  74.270  1.00  0.00           C
ATOM   1230  O   GLN A 374      71.750 -20.430  74.670  1.00  0.00           O
ATOM   1231  N   HIS A 375      70.270 -22.050  75.100  1.00  0.00           N
ATOM   1232  H   HIS A 375      69.600 -22.700  74.700  1.00  0.00           H
ATOM   1233  CA  HIS A 375      70.250 -22.070  76.560  1.00  0.00           C
ATOM   1234  HA  HIS A 375      71.270 -22.050  76.940  1.00  0.00           H
ATOM   1235  CB  HIS A 375      69.480 -20.860  77.160  1.00  0.00           C
ATOM   1236  HB1 HIS A 375      68.480 -21.020  76.770  1.00  0.00           H
ATOM   1237  HB2 HIS A 375      69.850 -19.920  76.760  1.00  0.00           H
ATOM   1238  CG  HIS A 375      69.390 -20.850  78.650  1.00  0.00           C
ATOM   1239  ND1 HIS A 375      68.320 -21.350  79.450  1.00  0.00           N
ATOM   1240  CE1 HIS A 375      68.610 -21.080  80.710  1.00  0.00           C
ATOM   1241  HE1 HIS A 375      67.870 -21.180  81.480  1.00  0.00           H
ATOM   1242  NE2 HIS A 375      69.670 -20.250  80.750  1.00  0.00           N
ATOM   1243  HE2 HIS A 375      70.170 -19.980  81.590  1.00  0.00           H
ATOM   1244  CD2 HIS A 375      70.240 -20.210  79.520  1.00  0.00           C
ATOM   1245  HD2 HIS A 375      71.140 -19.700  79.210  1.00  0.00           H
ATOM   1246  C   HIS A 375      69.610 -23.420  76.960  1.00  0.00           C
ATOM   1247  O   HIS A 375      68.680 -23.890  76.300  1.00  0.00           O
ATOM   1248  N   GLU A 376      70.100 -24.050  78.020  1.00  0.00           N
ATOM   1249  H   GLU A 376      70.880 -23.590  78.470  1.00  0.00           H
ATOM   1250  CA  GLU A 376      69.560 -25.310  78.510  1.00  0.00           C
ATOM   1251  HA  GLU A 376      69.480 -26.060  77.730  1.00  0.00           H
ATOM   1252  CB  GLU A 376      70.520 -25.900  79.610  1.00  0.00           C
ATOM   1253  HB1 GLU A 376      71.510 -25.880  79.140  1.00  0.00           H
ATOM   1254  HB2 GLU A 376      70.210 -26.930  79.760  1.00  0.00           H
ATOM   1255  CG  GLU A 376      70.360 -25.080  80.840  1.00  0.00           C
ATOM   1256  HG1 GLU A 376      69.370 -25.240  81.250  1.00  0.00           H
ATOM   1257  HG2 GLU A 376      70.620 -24.080  80.510  1.00  0.00           H
ATOM   1258  CD  GLU A 376      71.450 -25.500  81.900  1.00  0.00           C
ATOM   1259  OE1 GLU A 376      72.030 -26.660  81.870  1.00  0.00           O
ATOM   1260  OE2 GLU A 376      71.760 -24.620  82.750  1.00  0.00           O
ATOM   1261  C   GLU A 376      68.070 -25.230  79.010  1.00  0.00           C
ATOM   1262  O   GLU A 376      67.520 -26.270  79.330  1.00  0.00           O
ATOM   1263  N   ASN A 377      67.440 -24.110  79.170  1.00  0.00           N
ATOM   1264  H   ASN A 377      67.850 -23.260  78.800  1.00  0.00           H
ATOM   1265  CA  ASN A 377      66.000 -23.970  79.590  1.00  0.00           C
ATOM   1266  HA  ASN A 377      65.580 -24.970  79.610  1.00  0.00           H
ATOM   1267  CB  ASN A 377      65.880 -23.410  81.070  1.00  0.00           C
ATOM   1268  HB1 ASN A 377      64.850 -23.190  81.370  1.00  0.00           H
ATOM   1269  HB2 ASN A 377      66.370 -22.440  81.190  1.00  0.00           H
ATOM   1270  CG  ASN A 377      66.530 -24.310  82.100  1.00  0.00           C
ATOM   1271  OD1 ASN A 377      67.540 -23.990  82.720  1.00  0.00           O
ATOM   1272  ND2 ASN A 377      66.000 -25.500  82.240  1.00  0.00           N
ATOM   1273 1HD2 ASN A 377      65.070 -25.700  81.900  1.00  0.00           H
ATOM   1274 2HD2 ASN A 377      66.550 -26.130  82.800  1.00  0.00           H
ATOM   1275  C   ASN A 377      65.120 -23.260  78.560  1.00  0.00           C
ATOM   1276  O   ASN A 377      64.020 -22.780  78.870  1.00  0.00           O
ATOM   1277  N   VAL A 378      65.590 -23.160  77.310  1.00  0.00           N
ATOM   1278  H   VAL A 378      66.520 -23.470  77.080  1.00  0.00           H
ATOM   1279  CA  VAL A 378      64.790 -22.620  76.200  1.00  0.00           C
ATOM   1280  HA  VAL A 378      63.730 -22.610  76.440  1.00  0.00           H
ATOM   1281  CB  VAL A 378      65.260 -21.160  75.910  1.00  0.00           C
ATOM   1282  HB  VAL A 378      66.310 -21.210  75.600  1.00  0.00           H
ATOM   1283  CG1 VAL A 378      64.450 -20.600  74.770  1.00  0.00           C
ATOM   1284 1HG1 VAL A 378      64.680 -19.550  74.550  1.00  0.00           H
ATOM   1285 2HG1 VAL A 378      64.620 -21.200  73.870  1.00  0.00           H
ATOM   1286 3HG1 VAL A 378      63.440 -20.640  75.160  1.00  0.00           H
ATOM   1287  CG2 VAL A 378      65.090 -20.170  77.010  1.00  0.00           C
ATOM   1288 1HG2 VAL A 378      64.080 -19.990  77.360  1.00  0.00           H
ATOM   1289 2HG2 VAL A 378      65.740 -20.400  77.850  1.00  0.00           H
ATOM   1290 3HG2 VAL A 378      65.440 -19.190  76.650  1.00  0.00           H
ATOM   1291  C   VAL A 378      64.960 -23.560  75.030  1.00  0.00           C
ATOM   1292  O   VAL A 378      66.030 -24.150  74.800  1.00  0.00           O
ATOM   1293  N   VAL A 379      63.960 -23.580  74.130  1.00  0.00           N
ATOM   1294  H   VAL A 379      63.200 -22.940  74.320  1.00  0.00           H
ATOM   1295  CA  VAL A 379      63.990 -24.180  72.860  1.00  0.00           C
ATOM   1296  HA  VAL A 379      64.540 -25.120  72.880  1.00  0.00           H
ATOM   1297  CB  VAL A 379      62.560 -24.430  72.410  1.00  0.00           C
ATOM   1298  HB  VAL A 379      61.900 -23.570  72.310  1.00  0.00           H
ATOM   1299  CG1 VAL A 379      62.570 -25.140  71.070  1.00  0.00           C
ATOM   1300 1HG1 VAL A 379      62.720 -24.360  70.330  1.00  0.00           H
ATOM   1301 2HG1 VAL A 379      63.380 -25.870  71.020  1.00  0.00           H
ATOM   1302 3HG1 VAL A 379      61.580 -25.540  70.860  1.00  0.00           H
ATOM   1303  CG2 VAL A 379      61.860 -25.540  73.310  1.00  0.00           C
ATOM   1304 1HG2 VAL A 379      60.900 -25.800  72.860  1.00  0.00           H
ATOM   1305 2HG2 VAL A 379      62.410 -26.470  73.440  1.00  0.00           H
ATOM   1306 3HG2 VAL A 379      61.720 -25.080  74.290  1.00  0.00           H
ATOM   1307  C   VAL A 379      64.880 -23.470  71.830  1.00  0.00           C
ATOM   1308  O   VAL A 379      64.650 -22.320  71.490  1.00  0.00           O
ATOM   1309  N   GLU A 380      65.880 -24.220  71.350  1.00  0.00           N
ATOM   1310  H   GLU A 380      66.010 -25.150  71.720  1.00  0.00           H
ATOM   1311  CA  GLU A 380      66.590 -23.850  70.090  1.00  0.00           C
ATOM   1312  HA  GLU A 380      66.820 -22.800  70.240  1.00  0.00           H
ATOM   1313  CB  GLU A 380      67.890 -24.700  70.000  1.00  0.00           C
ATOM   1314  HB1 GLU A 380      68.450 -24.340  70.860  1.00  0.00           H
ATOM   1315  HB2 GLU A 380      68.510 -24.490  69.120  1.00  0.00           H
ATOM   1316  CG  GLU A 380      67.780 -26.180  69.990  1.00  0.00           C
ATOM   1317  HG1 GLU A 380      68.470 -26.670  69.320  1.00  0.00           H
ATOM   1318  HG2 GLU A 380      66.750 -26.300  69.660  1.00  0.00           H
ATOM   1319  CD  GLU A 380      67.930 -26.810  71.410  1.00  0.00           C
ATOM   1320  OE1 GLU A 380      69.010 -27.330  71.730  1.00  0.00           O
ATOM   1321  OE2 GLU A 380      67.000 -26.700  72.280  1.00  0.00           O
ATOM   1322  C   GLU A 380      65.740 -23.940  68.800  1.00  0.00           C
ATOM   1323  O   GLU A 380      64.870 -24.800  68.600  1.00  0.00           O
ATOM   1324  N   MET A 381      66.040 -22.960  67.910  1.00  0.00           N
ATOM   1325  H   MET A 381      66.750 -22.280  68.160  1.00  0.00           H
ATOM   1326  CA  MET A 381      65.440 -22.650  66.640  1.00  0.00           C
ATOM   1327  HA  MET A 381      64.660 -23.370  66.400  1.00  0.00           H
ATOM   1328  CB  MET A 381      64.690 -21.290  66.870  1.00  0.00           C
ATOM   1329  HB1 MET A 381      65.480 -20.540  66.940  1.00  0.00           H
ATOM   1330  HB2 MET A 381      64.040 -21.290  67.750  1.00  0.00           H
ATOM   1331  CG  MET A 381      63.700 -21.040  65.690  1.00  0.00           C
ATOM   1332  HG1 MET A 381      62.750 -21.550  65.810  1.00  0.00           H
ATOM   1333  HG2 MET A 381      64.120 -21.380  64.750  1.00  0.00           H
ATOM   1334  SD  MET A 381      63.260 -19.300  65.400  1.00  0.00           S
ATOM   1335  CE  MET A 381      64.260 -19.020  63.930  1.00  0.00           C
ATOM   1336  HE1 MET A 381      64.010 -19.800  63.210  1.00  0.00           H
ATOM   1337  HE2 MET A 381      63.980 -18.070  63.470  1.00  0.00           H
ATOM   1338  HE3 MET A 381      65.320 -19.080  64.130  1.00  0.00           H
ATOM   1339  C   MET A 381      66.490 -22.540  65.490  1.00  0.00           C
ATOM   1340  O   MET A 381      67.030 -21.500  65.140  1.00  0.00           O
ATOM   1341  N   TYR A 382      66.760 -23.740  65.010  1.00  0.00           N
ATOM   1342  H   TYR A 382      66.500 -24.520  65.580  1.00  0.00           H
ATOM   1343  CA  TYR A 382      67.920 -23.910  64.030  1.00  0.00           C
ATOM   1344  HA  TYR A 382      68.840 -23.660  64.560  1.00  0.00           H
ATOM   1345  CB  TYR A 382      67.950 -25.490  63.780  1.00  0.00           C
ATOM   1346  HB1 TYR A 382      68.770 -25.640  63.080  1.00  0.00           H
ATOM   1347  HB2 TYR A 382      67.030 -25.820  63.290  1.00  0.00           H
ATOM   1348  CG  TYR A 382      68.060 -26.400  65.000  1.00  0.00           C
ATOM   1349  CD1 TYR A 382      67.130 -27.450  65.230  1.00  0.00           C
ATOM   1350  HD1 TYR A 382      66.280 -27.480  64.560  1.00  0.00           H
ATOM   1351  CE1 TYR A 382      67.260 -28.260  66.360  1.00  0.00           C
ATOM   1352  HE1 TYR A 382      66.540 -29.040  66.580  1.00  0.00           H
ATOM   1353  CZ  TYR A 382      68.450 -28.060  67.230  1.00  0.00           C
ATOM   1354  OH  TYR A 382      68.640 -28.950  68.240  1.00  0.00           O
ATOM   1355  HH  TYR A 382      68.040 -29.700  68.150  1.00  0.00           H
ATOM   1356  CE2 TYR A 382      69.420 -27.050  66.990  1.00  0.00           C
ATOM   1357  HE2 TYR A 382      70.320 -26.880  67.570  1.00  0.00           H
ATOM   1358  CD2 TYR A 382      69.240 -26.270  65.830  1.00  0.00           C
ATOM   1359  HD2 TYR A 382      69.940 -25.460  65.670  1.00  0.00           H
ATOM   1360  C   TYR A 382      67.830 -23.210  62.710  1.00  0.00           C
ATOM   1361  O   TYR A 382      68.870 -22.870  62.190  1.00  0.00           O
ATOM   1362  N   ASN A 383      66.630 -23.150  62.080  1.00  0.00           N
ATOM   1363  H   ASN A 383      65.810 -23.320  62.640  1.00  0.00           H
ATOM   1364  CA  ASN A 383      66.440 -22.720  60.670  1.00  0.00           C
ATOM   1365  HA  ASN A 383      67.260 -22.040  60.430  1.00  0.00           H
ATOM   1366  CB  ASN A 383      66.410 -23.990  59.740  1.00  0.00           C
ATOM   1367  HB1 ASN A 383      66.070 -23.660  58.760  1.00  0.00           H
ATOM   1368  HB2 ASN A 383      65.760 -24.820  60.020  1.00  0.00           H
ATOM   1369  CG  ASN A 383      67.790 -24.660  59.640  1.00  0.00           C
ATOM   1370  OD1 ASN A 383      68.080 -25.710  60.070  1.00  0.00           O
ATOM   1371  ND2 ASN A 383      68.680 -23.980  58.990  1.00  0.00           N
ATOM   1372 1HD2 ASN A 383      68.430 -23.020  58.780  1.00  0.00           H
ATOM   1373 2HD2 ASN A 383      69.620 -24.290  59.220  1.00  0.00           H
ATOM   1374  C   ASN A 383      65.060 -22.010  60.460  1.00  0.00           C
ATOM   1375  O   ASN A 383      64.140 -22.170  61.280  1.00  0.00           O
ATOM   1376  N   SER A 384      65.060 -21.230  59.350  1.00  0.00           N
ATOM   1377  H   SER A 384      65.890 -21.140  58.780  1.00  0.00           H
ATOM   1378  CA  SER A 384      63.830 -20.700  58.840  1.00  0.00           C
ATOM   1379  HA  SER A 384      62.990 -21.350  59.080  1.00  0.00           H
ATOM   1380  CB  SER A 384      63.430 -19.420  59.590  1.00  0.00           C
ATOM   1381  HB1 SER A 384      63.420 -19.610  60.670  1.00  0.00           H
ATOM   1382  HB2 SER A 384      62.580 -18.910  59.130  1.00  0.00           H
ATOM   1383  OG  SER A 384      64.460 -18.530  59.370  1.00  0.00           O
ATOM   1384  HG  SER A 384      65.220 -18.970  59.770  1.00  0.00           H
ATOM   1385  C   SER A 384      63.800 -20.600  57.290  1.00  0.00           C
ATOM   1386  O   SER A 384      64.840 -20.570  56.640  1.00  0.00           O
ATOM   1387  N   TYR A 385      62.510 -20.530  56.790  1.00  0.00           N
ATOM   1388  H   TYR A 385      61.790 -20.680  57.490  1.00  0.00           H
ATOM   1389  CA  TYR A 385      62.280 -20.450  55.350  1.00  0.00           C
ATOM   1390  HA  TYR A 385      63.120 -19.980  54.830  1.00  0.00           H
ATOM   1391  CB  TYR A 385      62.090 -21.790  54.720  1.00  0.00           C
ATOM   1392  HB1 TYR A 385      62.190 -21.640  53.640  1.00  0.00           H
ATOM   1393  HB2 TYR A 385      61.090 -22.220  54.770  1.00  0.00           H
ATOM   1394  CG  TYR A 385      63.040 -22.870  55.220  1.00  0.00           C
ATOM   1395  CD1 TYR A 385      62.570 -23.780  56.220  1.00  0.00           C
ATOM   1396  HD1 TYR A 385      61.560 -23.720  56.600  1.00  0.00           H
ATOM   1397  CE1 TYR A 385      63.330 -24.790  56.710  1.00  0.00           C
ATOM   1398  HE1 TYR A 385      62.970 -25.470  57.460  1.00  0.00           H
ATOM   1399  CZ  TYR A 385      64.690 -24.850  56.280  1.00  0.00           C
ATOM   1400  OH  TYR A 385      65.510 -25.740  56.890  1.00  0.00           O
ATOM   1401  HH  TYR A 385      66.430 -25.730  56.610  1.00  0.00           H
ATOM   1402  CE2 TYR A 385      65.200 -23.940  55.390  1.00  0.00           C
ATOM   1403  HE2 TYR A 385      66.240 -24.020  55.110  1.00  0.00           H
ATOM   1404  CD2 TYR A 385      64.380 -22.970  54.720  1.00  0.00           C
ATOM   1405  HD2 TYR A 385      64.700 -22.290  53.950  1.00  0.00           H
ATOM   1406  C   TYR A 385      61.060 -19.570  54.990  1.00  0.00           C
ATOM   1407  O   TYR A 385      60.020 -19.710  55.620  1.00  0.00           O
ATOM   1408  N   LEU A 386      61.290 -18.880  53.880  1.00  0.00           N
ATOM   1409  H   LEU A 386      62.150 -18.980  53.370  1.00  0.00           H
ATOM   1410  CA  LEU A 386      60.110 -18.250  53.230  1.00  0.00           C
ATOM   1411  HA  LEU A 386      59.340 -17.960  53.950  1.00  0.00           H
ATOM   1412  CB  LEU A 386      60.600 -16.930  52.490  1.00  0.00           C
ATOM   1413  HB1 LEU A 386      59.850 -16.680  51.730  1.00  0.00           H
ATOM   1414  HB2 LEU A 386      61.530 -17.100  51.950  1.00  0.00           H
ATOM   1415  CG  LEU A 386      60.660 -15.740  53.420  1.00  0.00           C
ATOM   1416  HG  LEU A 386      61.300 -16.020  54.250  1.00  0.00           H
ATOM   1417  CD1 LEU A 386      61.610 -14.800  52.650  1.00  0.00           C
ATOM   1418 1HD1 LEU A 386      61.850 -13.910  53.230  1.00  0.00           H
ATOM   1419 2HD1 LEU A 386      62.570 -15.240  52.400  1.00  0.00           H
ATOM   1420 3HD1 LEU A 386      61.190 -14.480  51.690  1.00  0.00           H
ATOM   1421  CD2 LEU A 386      59.290 -15.060  53.690  1.00  0.00           C
ATOM   1422 1HD2 LEU A 386      58.790 -14.870  52.740  1.00  0.00           H
ATOM   1423 2HD2 LEU A 386      58.690 -15.790  54.240  1.00  0.00           H
ATOM   1424 3HD2 LEU A 386      59.380 -14.160  54.290  1.00  0.00           H
ATOM   1425  C   LEU A 386      59.390 -19.210  52.190  1.00  0.00           C
ATOM   1426  O   LEU A 386      59.900 -19.660  51.170  1.00  0.00           O
ATOM   1427  N   VAL A 387      58.070 -19.390  52.430  1.00  0.00           N
ATOM   1428  H   VAL A 387      57.720 -19.010  53.300  1.00  0.00           H
ATOM   1429  CA  VAL A 387      57.160 -20.170  51.520  1.00  0.00           C
ATOM   1430  HA  VAL A 387      57.700 -20.540  50.650  1.00  0.00           H
ATOM   1431  CB  VAL A 387      56.500 -21.430  52.240  1.00  0.00           C
ATOM   1432  HB  VAL A 387      55.790 -21.060  52.980  1.00  0.00           H
ATOM   1433  CG1 VAL A 387      55.790 -22.330  51.130  1.00  0.00           C
ATOM   1434 1HG1 VAL A 387      56.480 -23.020  50.640  1.00  0.00           H
ATOM   1435 2HG1 VAL A 387      55.130 -23.000  51.680  1.00  0.00           H
ATOM   1436 3HG1 VAL A 387      55.270 -21.680  50.430  1.00  0.00           H
ATOM   1437  CG2 VAL A 387      57.410 -22.210  53.110  1.00  0.00           C
ATOM   1438 1HG2 VAL A 387      56.940 -23.050  53.620  1.00  0.00           H
ATOM   1439 2HG2 VAL A 387      58.250 -22.550  52.510  1.00  0.00           H
ATOM   1440 3HG2 VAL A 387      57.870 -21.560  53.860  1.00  0.00           H
ATOM   1441  C   VAL A 387      56.200 -19.150  50.890  1.00  0.00           C
ATOM   1442  O   VAL A 387      54.960 -19.150  51.090  1.00  0.00           O
ATOM   1443  N   GLY A 388      56.830 -18.270  50.150  1.00  0.00           N
ATOM   1444  H   GLY A 388      57.830 -18.380  50.170  1.00  0.00           H
ATOM   1445  CA  GLY A 388      56.260 -17.070  49.480  1.00  0.00           C
ATOM   1446  HA1 GLY A 388      55.510 -17.410  48.760  1.00  0.00           H
ATOM   1447  HA2 GLY A 388      57.120 -16.620  48.990  1.00  0.00           H
ATOM   1448  C   GLY A 388      55.640 -16.080  50.470  1.00  0.00           C
ATOM   1449  O   GLY A 388      56.460 -15.330  51.010  1.00  0.00           O
ATOM   1450  N   ASP A 389      54.350 -16.020  50.670  1.00  0.00           N
ATOM   1451  H   ASP A 389      53.710 -16.620  50.170  1.00  0.00           H
ATOM   1452  CA  ASP A 389      53.530 -14.990  51.470  1.00  0.00           C
ATOM   1453  HA  ASP A 389      54.130 -14.080  51.500  1.00  0.00           H
ATOM   1454  CB  ASP A 389      52.230 -14.570  50.680  1.00  0.00           C
ATOM   1455  HB1 ASP A 389      51.680 -13.770  51.180  1.00  0.00           H
ATOM   1456  HB2 ASP A 389      51.600 -15.460  50.620  1.00  0.00           H
ATOM   1457  CG  ASP A 389      52.650 -14.040  49.360  1.00  0.00           C
ATOM   1458  OD1 ASP A 389      52.980 -12.850  49.310  1.00  0.00           O
ATOM   1459  OD2 ASP A 389      52.540 -14.750  48.320  1.00  0.00           O
ATOM   1460  C   ASP A 389      53.500 -15.330  52.960  1.00  0.00           C
ATOM   1461  O   ASP A 389      52.880 -14.640  53.790  1.00  0.00           O
ATOM   1462  N   GLU A 390      54.160 -16.410  53.400  1.00  0.00           N
ATOM   1463  H   GLU A 390      54.650 -17.000  52.750  1.00  0.00           H
ATOM   1464  CA  GLU A 390      54.210 -16.870  54.810  1.00  0.00           C
ATOM   1465  HA  GLU A 390      53.940 -16.030  55.450  1.00  0.00           H
ATOM   1466  CB  GLU A 390      53.130 -17.950  55.020  1.00  0.00           C
ATOM   1467  HB1 GLU A 390      52.140 -17.550  54.810  1.00  0.00           H
ATOM   1468  HB2 GLU A 390      53.180 -18.320  56.040  1.00  0.00           H
ATOM   1469  CG  GLU A 390      53.450 -19.090  54.000  1.00  0.00           C
ATOM   1470  HG1 GLU A 390      54.450 -19.430  54.290  1.00  0.00           H
ATOM   1471  HG2 GLU A 390      53.520 -18.720  52.980  1.00  0.00           H
ATOM   1472  CD  GLU A 390      52.460 -20.250  53.990  1.00  0.00           C
ATOM   1473  OE1 GLU A 390      51.270 -20.060  53.990  1.00  0.00           O
ATOM   1474  OE2 GLU A 390      52.850 -21.490  54.000  1.00  0.00           O
ATOM   1475  C   GLU A 390      55.710 -17.260  55.050  1.00  0.00           C
ATOM   1476  O   GLU A 390      56.510 -17.560  54.180  1.00  0.00           O
ATOM   1477  N   LEU A 391      55.990 -17.430  56.330  1.00  0.00           N
ATOM   1478  H   LEU A 391      55.270 -17.300  57.030  1.00  0.00           H
ATOM   1479  CA  LEU A 391      57.310 -17.600  56.920  1.00  0.00           C
ATOM   1480  HA  LEU A 391      58.110 -17.760  56.190  1.00  0.00           H
ATOM   1481  CB  LEU A 391      57.770 -16.350  57.740  1.00  0.00           C
ATOM   1482  HB1 LEU A 391      56.990 -16.080  58.450  1.00  0.00           H
ATOM   1483  HB2 LEU A 391      57.810 -15.440  57.140  1.00  0.00           H
ATOM   1484  CG  LEU A 391      59.130 -16.530  58.460  1.00  0.00           C
ATOM   1485  HG  LEU A 391      59.110 -17.380  59.150  1.00  0.00           H
ATOM   1486  CD1 LEU A 391      60.320 -16.720  57.530  1.00  0.00           C
ATOM   1487 1HD1 LEU A 391      60.280 -15.910  56.800  1.00  0.00           H
ATOM   1488 2HD1 LEU A 391      61.210 -16.580  58.150  1.00  0.00           H
ATOM   1489 3HD1 LEU A 391      60.260 -17.650  56.960  1.00  0.00           H
ATOM   1490  CD2 LEU A 391      59.490 -15.220  59.200  1.00  0.00           C
ATOM   1491 1HD2 LEU A 391      60.490 -15.220  59.620  1.00  0.00           H
ATOM   1492 2HD2 LEU A 391      59.390 -14.460  58.420  1.00  0.00           H
ATOM   1493 3HD2 LEU A 391      58.720 -14.960  59.930  1.00  0.00           H
ATOM   1494  C   LEU A 391      57.260 -18.870  57.780  1.00  0.00           C
ATOM   1495  O   LEU A 391      56.270 -19.000  58.500  1.00  0.00           O
ATOM   1496  N   TRP A 392      58.260 -19.770  57.750  1.00  0.00           N
ATOM   1497  H   TRP A 392      59.010 -19.650  57.090  1.00  0.00           H
ATOM   1498  CA  TRP A 392      58.320 -21.000  58.540  1.00  0.00           C
ATOM   1499  HA  TRP A 392      57.470 -20.960  59.230  1.00  0.00           H
ATOM   1500  CB  TRP A 392      58.250 -22.250  57.680  1.00  0.00           C
ATOM   1501  HB1 TRP A 392      58.280 -23.150  58.300  1.00  0.00           H
ATOM   1502  HB2 TRP A 392      59.060 -22.310  56.960  1.00  0.00           H
ATOM   1503  CG  TRP A 392      56.960 -22.510  56.890  1.00  0.00           C
ATOM   1504  CD1 TRP A 392      56.340 -21.640  56.050  1.00  0.00           C
ATOM   1505  HD1 TRP A 392      56.760 -20.690  55.760  1.00  0.00           H
ATOM   1506  NE1 TRP A 392      55.250 -22.130  55.430  1.00  0.00           N
ATOM   1507  HE1 TRP A 392      54.610 -21.560  54.910  1.00  0.00           H
ATOM   1508  CE2 TRP A 392      55.100 -23.460  55.740  1.00  0.00           C
ATOM   1509  CZ2 TRP A 392      54.210 -24.460  55.310  1.00  0.00           C
ATOM   1510  HZ2 TRP A 392      53.390 -24.180  54.650  1.00  0.00           H
ATOM   1511  CH2 TRP A 392      54.210 -25.660  56.020  1.00  0.00           C
ATOM   1512  HH2 TRP A 392      53.460 -26.420  55.840  1.00  0.00           H
ATOM   1513  CZ3 TRP A 392      55.290 -26.030  56.780  1.00  0.00           C
ATOM   1514  HZ3 TRP A 392      55.380 -26.990  57.270  1.00  0.00           H
ATOM   1515  CE3 TRP A 392      56.300 -25.100  57.070  1.00  0.00           C
ATOM   1516  HE3 TRP A 392      57.090 -25.480  57.710  1.00  0.00           H
ATOM   1517  CD2 TRP A 392      56.130 -23.700  56.730  1.00  0.00           C
ATOM   1518  C   TRP A 392      59.640 -20.960  59.390  1.00  0.00           C
ATOM   1519  O   TRP A 392      60.660 -20.570  58.850  1.00  0.00           O
ATOM   1520  N   VAL A 393      59.600 -21.490  60.630  1.00  0.00           N
ATOM   1521  H   VAL A 393      58.710 -21.820  60.980  1.00  0.00           H
ATOM   1522  CA  VAL A 393      60.690 -21.680  61.540  1.00  0.00           C
ATOM   1523  HA  VAL A 393      61.660 -21.420  61.140  1.00  0.00           H
ATOM   1524  CB  VAL A 393      60.560 -20.730  62.790  1.00  0.00           C
ATOM   1525  HB  VAL A 393      61.390 -20.820  63.490  1.00  0.00           H
ATOM   1526  CG1 VAL A 393      60.610 -19.300  62.330  1.00  0.00           C
ATOM   1527 1HG1 VAL A 393      59.710 -19.070  61.760  1.00  0.00           H
ATOM   1528 2HG1 VAL A 393      60.690 -18.670  63.210  1.00  0.00           H
ATOM   1529 3HG1 VAL A 393      61.460 -19.040  61.700  1.00  0.00           H
ATOM   1530  CG2 VAL A 393      59.310 -21.000  63.690  1.00  0.00           C
ATOM   1531 1HG2 VAL A 393      59.350 -22.000  64.130  1.00  0.00           H
ATOM   1532 2HG2 VAL A 393      59.410 -20.420  64.610  1.00  0.00           H
ATOM   1533 3HG2 VAL A 393      58.360 -20.840  63.180  1.00  0.00           H
ATOM   1534  C   VAL A 393      60.670 -23.180  61.930  1.00  0.00           C
ATOM   1535  O   VAL A 393      59.660 -23.740  62.360  1.00  0.00           O
ATOM   1536  N   VAL A 394      61.860 -23.820  61.810  1.00  0.00           N
ATOM   1537  H   VAL A 394      62.580 -23.250  61.390  1.00  0.00           H
ATOM   1538  CA  VAL A 394      62.360 -25.030  62.450  1.00  0.00           C
ATOM   1539  HA  VAL A 394      61.550 -25.760  62.420  1.00  0.00           H
ATOM   1540  CB  VAL A 394      63.410 -25.740  61.650  1.00  0.00           C
ATOM   1541  HB  VAL A 394      64.330 -25.150  61.650  1.00  0.00           H
ATOM   1542  CG1 VAL A 394      63.880 -27.060  62.290  1.00  0.00           C
ATOM   1543 1HG1 VAL A 394      63.050 -27.760  62.450  1.00  0.00           H
ATOM   1544 2HG1 VAL A 394      64.640 -27.470  61.630  1.00  0.00           H
ATOM   1545 3HG1 VAL A 394      64.510 -26.850  63.150  1.00  0.00           H
ATOM   1546  CG2 VAL A 394      62.970 -26.040  60.240  1.00  0.00           C
ATOM   1547 1HG2 VAL A 394      62.160 -26.760  60.370  1.00  0.00           H
ATOM   1548 2HG2 VAL A 394      62.680 -25.150  59.670  1.00  0.00           H
ATOM   1549 3HG2 VAL A 394      63.780 -26.490  59.680  1.00  0.00           H
ATOM   1550  C   VAL A 394      62.680 -24.880  63.920  1.00  0.00           C
ATOM   1551  O   VAL A 394      63.400 -23.930  64.260  1.00  0.00           O
ATOM   1552  N   MET A 395      62.410 -25.870  64.760  1.00  0.00           N
ATOM   1553  H   MET A 395      61.800 -26.610  64.440  1.00  0.00           H
ATOM   1554  CA  MET A 395      62.690 -25.930  66.220  1.00  0.00           C
ATOM   1555  HA  MET A 395      63.610 -25.390  66.430  1.00  0.00           H
ATOM   1556  CB  MET A 395      61.570 -25.400  67.140  1.00  0.00           C
ATOM   1557  HB1 MET A 395      61.790 -25.510  68.200  1.00  0.00           H
ATOM   1558  HB2 MET A 395      60.730 -26.040  66.850  1.00  0.00           H
ATOM   1559  CG  MET A 395      61.170 -23.970  66.820  1.00  0.00           C
ATOM   1560  HG1 MET A 395      61.120 -23.790  65.740  1.00  0.00           H
ATOM   1561  HG2 MET A 395      61.930 -23.250  67.120  1.00  0.00           H
ATOM   1562  SD  MET A 395      59.500 -23.460  67.450  1.00  0.00           S
ATOM   1563  CE  MET A 395      59.400 -23.800  69.200  1.00  0.00           C
ATOM   1564  HE1 MET A 395      60.260 -23.470  69.780  1.00  0.00           H
ATOM   1565  HE2 MET A 395      58.530 -23.300  69.630  1.00  0.00           H
ATOM   1566  HE3 MET A 395      59.440 -24.890  69.280  1.00  0.00           H
ATOM   1567  C   MET A 395      62.890 -27.380  66.700  1.00  0.00           C
ATOM   1568  O   MET A 395      62.470 -28.250  65.940  1.00  0.00           O
ATOM   1569  N   GLU A 396      63.440 -27.530  67.870  1.00  0.00           N
ATOM   1570  H   GLU A 396      63.630 -26.750  68.490  1.00  0.00           H
ATOM   1571  CA  GLU A 396      63.770 -28.900  68.290  1.00  0.00           C
ATOM   1572  HA  GLU A 396      64.190 -29.490  67.480  1.00  0.00           H
ATOM   1573  CB  GLU A 396      64.850 -28.820  69.410  1.00  0.00           C
ATOM   1574  HB1 GLU A 396      64.560 -28.030  70.090  1.00  0.00           H
ATOM   1575  HB2 GLU A 396      65.740 -28.410  68.930  1.00  0.00           H
ATOM   1576  CG  GLU A 396      65.320 -30.120  70.050  1.00  0.00           C
ATOM   1577  HG1 GLU A 396      64.570 -30.610  70.680  1.00  0.00           H
ATOM   1578  HG2 GLU A 396      66.210 -29.790  70.580  1.00  0.00           H
ATOM   1579  CD  GLU A 396      65.830 -31.070  68.980  1.00  0.00           C
ATOM   1580  OE1 GLU A 396      66.980 -30.850  68.470  1.00  0.00           O
ATOM   1581  OE2 GLU A 396      65.180 -32.040  68.570  1.00  0.00           O
ATOM   1582  C   GLU A 396      62.490 -29.680  68.700  1.00  0.00           C
ATOM   1583  O   GLU A 396      61.540 -29.110  69.200  1.00  0.00           O
ATOM   1584  N   PHE A 397      62.610 -31.010  68.760  1.00  0.00           N
ATOM   1585  H   PHE A 397      63.480 -31.480  68.540  1.00  0.00           H
ATOM   1586  CA  PHE A 397      61.560 -31.960  69.210  1.00  0.00           C
ATOM   1587  HA  PHE A 397      60.610 -31.450  69.090  1.00  0.00           H
ATOM   1588  CB  PHE A 397      61.530 -33.190  68.230  1.00  0.00           C
ATOM   1589  HB1 PHE A 397      62.580 -33.480  68.150  1.00  0.00           H
ATOM   1590  HB2 PHE A 397      61.200 -33.000  67.210  1.00  0.00           H
ATOM   1591  CG  PHE A 397      60.800 -34.400  68.860  1.00  0.00           C
ATOM   1592  CD1 PHE A 397      59.400 -34.510  68.570  1.00  0.00           C
ATOM   1593  HD1 PHE A 397      58.880 -33.770  67.980  1.00  0.00           H
ATOM   1594  CE1 PHE A 397      58.760 -35.570  69.080  1.00  0.00           C
ATOM   1595  HE1 PHE A 397      57.720 -35.660  68.800  1.00  0.00           H
ATOM   1596  CZ  PHE A 397      59.500 -36.670  69.620  1.00  0.00           C
ATOM   1597  HZ  PHE A 397      58.980 -37.590  69.810  1.00  0.00           H
ATOM   1598  CE2 PHE A 397      60.820 -36.620  69.940  1.00  0.00           C
ATOM   1599  HE2 PHE A 397      61.400 -37.370  70.460  1.00  0.00           H
ATOM   1600  CD2 PHE A 397      61.470 -35.420  69.520  1.00  0.00           C
ATOM   1601  HD2 PHE A 397      62.500 -35.290  69.810  1.00  0.00           H
ATOM   1602  C   PHE A 397      61.920 -32.330  70.680  1.00  0.00           C
ATOM   1603  O   PHE A 397      63.110 -32.670  70.950  1.00  0.00           O
ATOM   1604  N   LEU A 398      60.950 -32.110  71.560  1.00  0.00           N
ATOM   1605  H   LEU A 398      60.120 -31.660  71.200  1.00  0.00           H
ATOM   1606  CA  LEU A 398      61.110 -32.420  72.990  1.00  0.00           C
ATOM   1607  HA  LEU A 398      62.160 -32.540  73.260  1.00  0.00           H
ATOM   1608  CB  LEU A 398      60.590 -31.170  73.830  1.00  0.00           C
ATOM   1609  HB1 LEU A 398      60.400 -31.480  74.860  1.00  0.00           H
ATOM   1610  HB2 LEU A 398      59.680 -30.860  73.320  1.00  0.00           H
ATOM   1611  CG  LEU A 398      61.540 -30.000  73.980  1.00  0.00           C
ATOM   1612  HG  LEU A 398      60.830 -29.250  74.330  1.00  0.00           H
ATOM   1613  CD1 LEU A 398      62.560 -30.180  75.100  1.00  0.00           C
ATOM   1614 1HD1 LEU A 398      62.100 -30.430  76.060  1.00  0.00           H
ATOM   1615 2HD1 LEU A 398      63.280 -30.950  74.810  1.00  0.00           H
ATOM   1616 3HD1 LEU A 398      63.280 -29.380  75.270  1.00  0.00           H
ATOM   1617  CD2 LEU A 398      62.180 -29.520  72.700  1.00  0.00           C
ATOM   1618 1HD2 LEU A 398      62.650 -28.540  72.810  1.00  0.00           H
ATOM   1619 2HD2 LEU A 398      62.910 -30.290  72.430  1.00  0.00           H
ATOM   1620 3HD2 LEU A 398      61.440 -29.400  71.910  1.00  0.00           H
ATOM   1621  C   LEU A 398      60.330 -33.690  73.260  1.00  0.00           C
ATOM   1622  O   LEU A 398      59.150 -33.590  73.410  1.00  0.00           O
ATOM   1623  N   GLU A 399      60.930 -34.810  73.330  1.00  0.00           N
ATOM   1624  H   GLU A 399      61.940 -34.790  73.280  1.00  0.00           H
ATOM   1625  CA  GLU A 399      60.200 -36.130  73.440  1.00  0.00           C
ATOM   1626  HA  GLU A 399      59.620 -36.210  72.520  1.00  0.00           H
ATOM   1627  CB  GLU A 399      61.350 -37.200  73.530  1.00  0.00           C
ATOM   1628  HB1 GLU A 399      61.720 -37.140  74.550  1.00  0.00           H
ATOM   1629  HB2 GLU A 399      62.100 -36.810  72.850  1.00  0.00           H
ATOM   1630  CG  GLU A 399      60.910 -38.680  73.220  1.00  0.00           C
ATOM   1631  HG1 GLU A 399      60.530 -38.780  72.210  1.00  0.00           H
ATOM   1632  HG2 GLU A 399      60.080 -39.040  73.830  1.00  0.00           H
ATOM   1633  CD  GLU A 399      62.060 -39.640  73.470  1.00  0.00           C
ATOM   1634  OE1 GLU A 399      61.920 -40.600  74.270  1.00  0.00           O
ATOM   1635  OE2 GLU A 399      63.100 -39.580  72.780  1.00  0.00           O
ATOM   1636  C   GLU A 399      59.170 -36.270  74.580  1.00  0.00           C
ATOM   1637  O   GLU A 399      58.200 -37.050  74.460  1.00  0.00           O
ATOM   1638  N   GLY A 400      59.260 -35.410  75.580  1.00  0.00           N
ATOM   1639  H   GLY A 400      60.030 -34.760  75.580  1.00  0.00           H
ATOM   1640  CA  GLY A 400      58.330 -35.430  76.770  1.00  0.00           C
ATOM   1641  HA1 GLY A 400      58.780 -34.820  77.560  1.00  0.00           H
ATOM   1642  HA2 GLY A 400      58.300 -36.400  77.250  1.00  0.00           H
ATOM   1643  C   GLY A 400      56.970 -34.840  76.520  1.00  0.00           C
ATOM   1644  O   GLY A 400      56.040 -35.190  77.250  1.00  0.00           O
ATOM   1645  N   GLY A 401      56.820 -33.870  75.580  1.00  0.00           N
ATOM   1646  H   GLY A 401      57.670 -33.450  75.210  1.00  0.00           H
ATOM   1647  CA  GLY A 401      55.570 -33.150  75.230  1.00  0.00           C
ATOM   1648  HA1 GLY A 401      54.720 -33.760  75.530  1.00  0.00           H
ATOM   1649  HA2 GLY A 401      55.570 -32.950  74.160  1.00  0.00           H
ATOM   1650  C   GLY A 401      55.470 -31.750  75.910  1.00  0.00           C
ATOM   1651  O   GLY A 401      56.510 -31.130  76.170  1.00  0.00           O
ATOM   1652  N   ALA A 402      54.290 -31.350  76.430  1.00  0.00           N
ATOM   1653  H   ALA A 402      53.600 -32.090  76.450  1.00  0.00           H
ATOM   1654  CA  ALA A 402      54.090 -30.110  77.110  1.00  0.00           C
ATOM   1655  HA  ALA A 402      54.980 -29.500  76.950  1.00  0.00           H
ATOM   1656  CB  ALA A 402      52.940 -29.440  76.400  1.00  0.00           C
ATOM   1657  HB1 ALA A 402      52.120 -30.150  76.370  1.00  0.00           H
ATOM   1658  HB2 ALA A 402      52.580 -28.490  76.800  1.00  0.00           H
ATOM   1659  HB3 ALA A 402      53.230 -29.250  75.360  1.00  0.00           H
ATOM   1660  C   ALA A 402      53.850 -30.410  78.650  1.00  0.00           C
ATOM   1661  O   ALA A 402      53.250 -31.380  79.030  1.00  0.00           O
ATOM   1662  N   LEU A 403      54.290 -29.460  79.570  1.00  0.00           N
ATOM   1663  H   LEU A 403      54.590 -28.610  79.130  1.00  0.00           H
ATOM   1664  CA  LEU A 403      53.940 -29.410  80.980  1.00  0.00           C
ATOM   1665  HA  LEU A 403      54.690 -29.960  81.550  1.00  0.00           H
ATOM   1666  CB  LEU A 403      54.330 -27.970  81.460  1.00  0.00           C
ATOM   1667  HB1 LEU A 403      54.040 -27.270  80.680  1.00  0.00           H
ATOM   1668  HB2 LEU A 403      55.420 -27.980  81.520  1.00  0.00           H
ATOM   1669  CG  LEU A 403      53.840 -27.630  82.920  1.00  0.00           C
ATOM   1670  HG  LEU A 403      52.780 -27.870  83.010  1.00  0.00           H
ATOM   1671  CD1 LEU A 403      54.640 -28.530  84.000  1.00  0.00           C
ATOM   1672 1HD1 LEU A 403      54.570 -28.070  84.990  1.00  0.00           H
ATOM   1673 2HD1 LEU A 403      54.280 -29.550  83.860  1.00  0.00           H
ATOM   1674 3HD1 LEU A 403      55.720 -28.510  83.890  1.00  0.00           H
ATOM   1675  CD2 LEU A 403      54.030 -26.160  83.100  1.00  0.00           C
ATOM   1676 1HD2 LEU A 403      55.100 -25.920  83.070  1.00  0.00           H
ATOM   1677 2HD2 LEU A 403      53.490 -25.690  82.280  1.00  0.00           H
ATOM   1678 3HD2 LEU A 403      53.570 -25.770  84.010  1.00  0.00           H
ATOM   1679  C   LEU A 403      52.440 -29.710  81.280  1.00  0.00           C
ATOM   1680  O   LEU A 403      52.100 -30.410  82.250  1.00  0.00           O
ATOM   1681  N   THR A 404      51.550 -29.330  80.360  1.00  0.00           N
ATOM   1682  H   THR A 404      51.940 -29.040  79.480  1.00  0.00           H
ATOM   1683  CA  THR A 404      50.060 -29.470  80.590  1.00  0.00           C
ATOM   1684  HA  THR A 404      49.790 -29.280  81.630  1.00  0.00           H
ATOM   1685  CB  THR A 404      49.260 -28.580  79.640  1.00  0.00           C
ATOM   1686  HB  THR A 404      48.200 -28.790  79.810  1.00  0.00           H
ATOM   1687  CG2 THR A 404      49.460 -27.220  80.130  1.00  0.00           C
ATOM   1688 1HG2 THR A 404      48.680 -26.580  79.720  1.00  0.00           H
ATOM   1689 2HG2 THR A 404      49.410 -27.190  81.210  1.00  0.00           H
ATOM   1690 3HG2 THR A 404      50.430 -26.890  79.750  1.00  0.00           H
ATOM   1691  OG1 THR A 404      49.800 -28.640  78.310  1.00  0.00           O
ATOM   1692  HG1 THR A 404      49.300 -27.990  77.810  1.00  0.00           H
ATOM   1693  C   THR A 404      49.620 -30.880  80.410  1.00  0.00           C
ATOM   1694  O   THR A 404      48.630 -31.210  81.020  1.00  0.00           O
ATOM   1695  N   ASP A 405      50.380 -31.730  79.740  1.00  0.00           N
ATOM   1696  H   ASP A 405      51.250 -31.330  79.410  1.00  0.00           H
ATOM   1697  CA  ASP A 405      50.180 -33.170  79.720  1.00  0.00           C
ATOM   1698  HA  ASP A 405      49.210 -33.230  79.230  1.00  0.00           H
ATOM   1699  CB  ASP A 405      51.220 -33.880  78.850  1.00  0.00           C
ATOM   1700  HB1 ASP A 405      51.050 -34.960  78.790  1.00  0.00           H
ATOM   1701  HB2 ASP A 405      52.180 -33.860  79.370  1.00  0.00           H
ATOM   1702  CG  ASP A 405      51.350 -33.390  77.480  1.00  0.00           C
ATOM   1703  OD1 ASP A 405      52.380 -33.710  76.820  1.00  0.00           O
ATOM   1704  OD2 ASP A 405      50.470 -32.700  76.990  1.00  0.00           O
ATOM   1705  C   ASP A 405      50.080 -33.880  81.030  1.00  0.00           C
ATOM   1706  O   ASP A 405      49.320 -34.810  81.190  1.00  0.00           O
ATOM   1707  N   ILE A 406      50.760 -33.340  82.030  1.00  0.00           N
ATOM   1708  H   ILE A 406      51.260 -32.510  81.750  1.00  0.00           H
ATOM   1709  CA  ILE A 406      50.870 -33.940  83.390  1.00  0.00           C
ATOM   1710  HA  ILE A 406      50.720 -35.010  83.300  1.00  0.00           H
ATOM   1711  CB  ILE A 406      52.240 -33.590  84.080  1.00  0.00           C
ATOM   1712  HB  ILE A 406      52.460 -32.540  83.900  1.00  0.00           H
ATOM   1713  CG2 ILE A 406      52.220 -33.950  85.620  1.00  0.00           C
ATOM   1714 1HG2 ILE A 406      51.590 -33.200  86.100  1.00  0.00           H
ATOM   1715 2HG2 ILE A 406      51.800 -34.940  85.720  1.00  0.00           H
ATOM   1716 3HG2 ILE A 406      53.210 -33.910  86.090  1.00  0.00           H
ATOM   1717  CG1 ILE A 406      53.350 -34.400  83.340  1.00  0.00           C
ATOM   1718 1HG1 ILE A 406      53.300 -34.110  82.290  1.00  0.00           H
ATOM   1719 2HG1 ILE A 406      53.120 -35.460  83.320  1.00  0.00           H
ATOM   1720  CD  ILE A 406      54.810 -34.110  83.700  1.00  0.00           C
ATOM   1721  HD1 ILE A 406      54.990 -34.480  84.710  1.00  0.00           H
ATOM   1722  HD2 ILE A 406      55.460 -34.630  82.990  1.00  0.00           H
ATOM   1723  HD3 ILE A 406      55.030 -33.050  83.610  1.00  0.00           H
ATOM   1724  C   ILE A 406      49.790 -33.320  84.300  1.00  0.00           C
ATOM   1725  O   ILE A 406      48.930 -34.000  84.840  1.00  0.00           O
ATOM   1726  N   VAL A 407      49.820 -31.960  84.500  1.00  0.00           N
ATOM   1727  H   VAL A 407      50.490 -31.470  83.940  1.00  0.00           H
ATOM   1728  CA  VAL A 407      49.000 -31.250  85.540  1.00  0.00           C
ATOM   1729  HA  VAL A 407      49.030 -31.900  86.420  1.00  0.00           H
ATOM   1730  CB  VAL A 407      49.650 -29.960  85.950  1.00  0.00           C
ATOM   1731  HB  VAL A 407      49.080 -29.410  86.700  1.00  0.00           H
ATOM   1732  CG1 VAL A 407      50.980 -30.230  86.750  1.00  0.00           C
ATOM   1733 1HG1 VAL A 407      50.700 -30.740  87.680  1.00  0.00           H
ATOM   1734 2HG1 VAL A 407      51.580 -30.820  86.060  1.00  0.00           H
ATOM   1735 3HG1 VAL A 407      51.420 -29.300  87.090  1.00  0.00           H
ATOM   1736  CG2 VAL A 407      49.900 -28.980  84.770  1.00  0.00           C
ATOM   1737 1HG2 VAL A 407      50.720 -29.380  84.170  1.00  0.00           H
ATOM   1738 2HG2 VAL A 407      49.120 -28.850  84.020  1.00  0.00           H
ATOM   1739 3HG2 VAL A 407      50.080 -27.940  85.060  1.00  0.00           H
ATOM   1740  C   VAL A 407      47.490 -31.120  85.230  1.00  0.00           C
ATOM   1741  O   VAL A 407      46.750 -30.890  86.180  1.00  0.00           O
ATOM   1742  N   THR A 408      47.080 -31.310  83.960  1.00  0.00           N
ATOM   1743  H   THR A 408      47.750 -31.610  83.260  1.00  0.00           H
ATOM   1744  CA  THR A 408      45.670 -31.470  83.640  1.00  0.00           C
ATOM   1745  HA  THR A 408      45.100 -30.740  84.220  1.00  0.00           H
ATOM   1746  CB  THR A 408      45.460 -31.240  82.130  1.00  0.00           C
ATOM   1747  HB  THR A 408      44.410 -31.430  81.900  1.00  0.00           H
ATOM   1748  CG2 THR A 408      45.820 -29.830  81.620  1.00  0.00           C
ATOM   1749 1HG2 THR A 408      45.000 -29.190  81.950  1.00  0.00           H
ATOM   1750 2HG2 THR A 408      46.750 -29.400  81.970  1.00  0.00           H
ATOM   1751 3HG2 THR A 408      45.820 -29.790  80.530  1.00  0.00           H
ATOM   1752  OG1 THR A 408      46.160 -32.240  81.440  1.00  0.00           O
ATOM   1753  HG1 THR A 408      46.990 -31.850  81.170  1.00  0.00           H
ATOM   1754  C   THR A 408      45.060 -32.770  83.990  1.00  0.00           C
ATOM   1755  O   THR A 408      43.840 -32.890  83.910  1.00  0.00           O
ATOM   1756  N   HIS A 409      45.830 -33.740  84.510  1.00  0.00           N
ATOM   1757  H   HIS A 409      46.810 -33.490  84.590  1.00  0.00           H
ATOM   1758  CA  HIS A 409      45.430 -35.060  84.970  1.00  0.00           C
ATOM   1759  HA  HIS A 409      44.350 -35.110  84.860  1.00  0.00           H
ATOM   1760  CB  HIS A 409      46.150 -36.080  84.070  1.00  0.00           C
ATOM   1761  HB1 HIS A 409      47.230 -36.070  84.220  1.00  0.00           H
ATOM   1762  HB2 HIS A 409      45.930 -35.800  83.040  1.00  0.00           H
ATOM   1763  CG  HIS A 409      45.750 -37.510  84.210  1.00  0.00           C
ATOM   1764  ND1 HIS A 409      46.520 -38.510  84.600  1.00  0.00           N
ATOM   1765  HD1 HIS A 409      47.510 -38.420  84.800  1.00  0.00           H
ATOM   1766  CE1 HIS A 409      45.770 -39.570  84.850  1.00  0.00           C
ATOM   1767  HE1 HIS A 409      46.110 -40.550  85.140  1.00  0.00           H
ATOM   1768  NE2 HIS A 409      44.510 -39.250  84.670  1.00  0.00           N
ATOM   1769  CD2 HIS A 409      44.450 -37.940  84.310  1.00  0.00           C
ATOM   1770  HD2 HIS A 409      43.590 -37.330  84.040  1.00  0.00           H
ATOM   1771  C   HIS A 409      45.750 -35.230  86.430  1.00  0.00           C
ATOM   1772  O   HIS A 409      44.910 -35.670  87.250  1.00  0.00           O
ATOM   1773  N   THR A 410      46.990 -34.820  86.780  1.00  0.00           N
ATOM   1774  H   THR A 410      47.670 -34.470  86.120  1.00  0.00           H
ATOM   1775  CA  THR A 410      47.550 -35.290  88.030  1.00  0.00           C
ATOM   1776  HA  THR A 410      46.820 -35.760  88.690  1.00  0.00           H
ATOM   1777  CB  THR A 410      48.710 -36.250  87.770  1.00  0.00           C
ATOM   1778  HB  THR A 410      49.320 -35.810  86.980  1.00  0.00           H
ATOM   1779  CG2 THR A 410      49.560 -36.630  89.000  1.00  0.00           C
ATOM   1780 1HG2 THR A 410      48.920 -36.870  89.850  1.00  0.00           H
ATOM   1781 2HG2 THR A 410      50.170 -37.510  88.790  1.00  0.00           H
ATOM   1782 3HG2 THR A 410      50.340 -35.950  89.320  1.00  0.00           H
ATOM   1783  OG1 THR A 410      48.210 -37.520  87.290  1.00  0.00           O
ATOM   1784  HG1 THR A 410      48.620 -37.520  86.420  1.00  0.00           H
ATOM   1785  C   THR A 410      48.080 -34.170  88.920  1.00  0.00           C
ATOM   1786  O   THR A 410      48.650 -33.130  88.440  1.00  0.00           O
ATOM   1787  N   ARG A 411      47.950 -34.260  90.250  1.00  0.00           N
ATOM   1788  H   ARG A 411      47.410 -35.060  90.550  1.00  0.00           H
ATOM   1789  CA  ARG A 411      48.510 -33.490  91.360  1.00  0.00           C
ATOM   1790  HA  ARG A 411      48.240 -32.440  91.210  1.00  0.00           H
ATOM   1791  CB  ARG A 411      47.880 -33.980  92.620  1.00  0.00           C
ATOM   1792  HB1 ARG A 411      48.210 -35.000  92.780  1.00  0.00           H
ATOM   1793  HB2 ARG A 411      46.790 -33.930  92.510  1.00  0.00           H
ATOM   1794  CG  ARG A 411      48.390 -33.200  93.920  1.00  0.00           C
ATOM   1795  HG1 ARG A 411      47.480 -33.070  94.500  1.00  0.00           H
ATOM   1796  HG2 ARG A 411      48.850 -32.270  93.600  1.00  0.00           H
ATOM   1797  CD  ARG A 411      49.480 -33.980  94.710  1.00  0.00           C
ATOM   1798  HD1 ARG A 411      49.850 -33.320  95.490  1.00  0.00           H
ATOM   1799  HD2 ARG A 411      50.250 -34.250  93.990  1.00  0.00           H
ATOM   1800  NE  ARG A 411      48.860 -35.200  95.290  1.00  0.00           N
ATOM   1801  HE  ARG A 411      47.930 -35.450  94.990  1.00  0.00           H
ATOM   1802  CZ  ARG A 411      49.420 -36.030  96.060  1.00  0.00           C
ATOM   1803  NH1 ARG A 411      50.660 -35.930  96.470  1.00  0.00           N
ATOM   1804 1HH1 ARG A 411      51.120 -35.040  96.390  1.00  0.00           H
ATOM   1805 2HH1 ARG A 411      50.960 -36.650  97.110  1.00  0.00           H
ATOM   1806  NH2 ARG A 411      48.790 -37.120  96.410  1.00  0.00           N
ATOM   1807 1HH2 ARG A 411      47.870 -37.310  96.040  1.00  0.00           H
ATOM   1808 2HH2 ARG A 411      49.310 -37.830  96.910  1.00  0.00           H
ATOM   1809  C   ARG A 411      50.000 -33.560  91.330  1.00  0.00           C
ATOM   1810  O   ARG A 411      50.540 -34.700  91.630  1.00  0.00           O
ATOM   1811  N   MET A 412      50.720 -32.520  91.000  1.00  0.00           N
ATOM   1812  H   MET A 412      50.230 -31.700  90.680  1.00  0.00           H
ATOM   1813  CA  MET A 412      52.170 -32.290  91.130  1.00  0.00           C
ATOM   1814  HA  MET A 412      52.630 -33.280  91.140  1.00  0.00           H
ATOM   1815  CB  MET A 412      52.650 -31.400  89.980  1.00  0.00           C
ATOM   1816  HB1 MET A 412      52.120 -30.450  89.970  1.00  0.00           H
ATOM   1817  HB2 MET A 412      52.450 -31.940  89.050  1.00  0.00           H
ATOM   1818  CG  MET A 412      54.160 -31.310  89.940  1.00  0.00           C
ATOM   1819  HG1 MET A 412      54.650 -32.250  90.180  1.00  0.00           H
ATOM   1820  HG2 MET A 412      54.460 -30.710  90.800  1.00  0.00           H
ATOM   1821  SD  MET A 412      54.740 -30.450  88.480  1.00  0.00           S
ATOM   1822  CE  MET A 412      54.190 -31.440  87.140  1.00  0.00           C
ATOM   1823  HE1 MET A 412      54.690 -31.140  86.220  1.00  0.00           H
ATOM   1824  HE2 MET A 412      54.620 -32.430  87.280  1.00  0.00           H
ATOM   1825  HE3 MET A 412      53.100 -31.390  87.120  1.00  0.00           H
ATOM   1826  C   MET A 412      52.490 -31.670  92.490  1.00  0.00           C
ATOM   1827  O   MET A 412      51.870 -30.690  92.940  1.00  0.00           O
ATOM   1828  N   ASN A 413      53.490 -32.280  93.190  1.00  0.00           N
ATOM   1829  H   ASN A 413      54.080 -33.020  92.840  1.00  0.00           H
ATOM   1830  CA  ASN A 413      53.830 -31.770  94.540  1.00  0.00           C
ATOM   1831  HA  ASN A 413      52.870 -31.560  95.030  1.00  0.00           H
ATOM   1832  CB  ASN A 413      54.500 -33.000  95.230  1.00  0.00           C
ATOM   1833  HB1 ASN A 413      54.940 -32.650  96.160  1.00  0.00           H
ATOM   1834  HB2 ASN A 413      55.350 -33.360  94.640  1.00  0.00           H
ATOM   1835  CG  ASN A 413      53.590 -34.080  95.560  1.00  0.00           C
ATOM   1836  OD1 ASN A 413      52.410 -33.960  95.620  1.00  0.00           O
ATOM   1837  ND2 ASN A 413      54.080 -35.230  95.890  1.00  0.00           N
ATOM   1838 1HD2 ASN A 413      55.080 -35.340  95.870  1.00  0.00           H
ATOM   1839 2HD2 ASN A 413      53.570 -36.100  95.970  1.00  0.00           H
ATOM   1840  C   ASN A 413      54.580 -30.450  94.470  1.00  0.00           C
ATOM   1841  O   ASN A 413      55.190 -30.220  93.380  1.00  0.00           O
ATOM   1842  N   GLU A 414      54.690 -29.660  95.520  1.00  0.00           N
ATOM   1843  H   GLU A 414      54.240 -30.040  96.340  1.00  0.00           H
ATOM   1844  CA  GLU A 414      55.200 -28.320  95.520  1.00  0.00           C
ATOM   1845  HA  GLU A 414      54.630 -27.700  94.820  1.00  0.00           H
ATOM   1846  CB  GLU A 414      55.190 -27.910  97.020  1.00  0.00           C
ATOM   1847  HB1 GLU A 414      56.010 -27.210  97.180  1.00  0.00           H
ATOM   1848  HB2 GLU A 414      55.430 -28.720  97.710  1.00  0.00           H
ATOM   1849  CG  GLU A 414      53.810 -27.260  97.350  1.00  0.00           C
ATOM   1850  HG1 GLU A 414      53.020 -28.010  97.300  1.00  0.00           H
ATOM   1851  HG2 GLU A 414      53.610 -26.490  96.600  1.00  0.00           H
ATOM   1852  CD  GLU A 414      53.800 -26.610  98.730  1.00  0.00           C
ATOM   1853  OE1 GLU A 414      53.070 -27.080  99.610  1.00  0.00           O
ATOM   1854  OE2 GLU A 414      54.530 -25.640  98.970  1.00  0.00           O
ATOM   1855  C   GLU A 414      56.720 -28.290  95.060  1.00  0.00           C
ATOM   1856  O   GLU A 414      57.140 -27.380  94.310  1.00  0.00           O
ATOM   1857  N   GLU A 415      57.490 -29.340  95.420  1.00  0.00           N
ATOM   1858  H   GLU A 415      57.090 -29.980  96.100  1.00  0.00           H
ATOM   1859  CA  GLU A 415      58.950 -29.480  95.080  1.00  0.00           C
ATOM   1860  HA  GLU A 415      59.440 -28.540  95.310  1.00  0.00           H
ATOM   1861  CB  GLU A 415      59.650 -30.720  95.700  1.00  0.00           C
ATOM   1862  HB1 GLU A 415      60.740 -30.690  95.610  1.00  0.00           H
ATOM   1863  HB2 GLU A 415      59.270 -31.540  95.080  1.00  0.00           H
ATOM   1864  CG  GLU A 415      59.330 -31.080  97.230  1.00  0.00           C
ATOM   1865  HG1 GLU A 415      59.360 -30.110  97.720  1.00  0.00           H
ATOM   1866  HG2 GLU A 415      60.160 -31.700  97.550  1.00  0.00           H
ATOM   1867  CD  GLU A 415      57.950 -31.680  97.430  1.00  0.00           C
ATOM   1868  OE1 GLU A 415      56.960 -30.960  97.740  1.00  0.00           O
ATOM   1869  OE2 GLU A 415      57.880 -32.920  97.410  1.00  0.00           O
ATOM   1870  C   GLU A 415      59.180 -29.640  93.520  1.00  0.00           C
ATOM   1871  O   GLU A 415      60.170 -29.130  92.960  1.00  0.00           O
ATOM   1872  N   GLN A 416      58.180 -30.220  92.830  1.00  0.00           N
ATOM   1873  H   GLN A 416      57.300 -30.530  93.200  1.00  0.00           H
ATOM   1874  CA  GLN A 416      58.200 -30.310  91.380  1.00  0.00           C
ATOM   1875  HA  GLN A 416      59.240 -30.470  91.130  1.00  0.00           H
ATOM   1876  CB  GLN A 416      57.380 -31.590  90.970  1.00  0.00           C
ATOM   1877  HB1 GLN A 416      56.980 -31.480  89.960  1.00  0.00           H
ATOM   1878  HB2 GLN A 416      56.550 -31.700  91.660  1.00  0.00           H
ATOM   1879  CG  GLN A 416      58.170 -32.860  91.030  1.00  0.00           C
ATOM   1880  HG1 GLN A 416      59.120 -32.830  90.510  1.00  0.00           H
ATOM   1881  HG2 GLN A 416      57.580 -33.620  90.510  1.00  0.00           H
ATOM   1882  CD  GLN A 416      58.430 -33.290  92.430  1.00  0.00           C
ATOM   1883  OE1 GLN A 416      57.590 -33.510  93.270  1.00  0.00           O
ATOM   1884  NE2 GLN A 416      59.630 -33.490  92.770  1.00  0.00           N
ATOM   1885 1HE2 GLN A 416      60.360 -33.470  92.080  1.00  0.00           H
ATOM   1886 2HE2 GLN A 416      59.810 -34.080  93.570  1.00  0.00           H
ATOM   1887  C   GLN A 416      57.690 -29.010  90.700  1.00  0.00           C
ATOM   1888  O   GLN A 416      58.410 -28.480  89.830  1.00  0.00           O
ATOM   1889  N   ILE A 417      56.610 -28.360  91.240  1.00  0.00           N
ATOM   1890  H   ILE A 417      56.260 -28.720  92.120  1.00  0.00           H
ATOM   1891  CA  ILE A 417      56.210 -27.020  90.890  1.00  0.00           C
ATOM   1892  HA  ILE A 417      56.030 -26.980  89.810  1.00  0.00           H
ATOM   1893  CB  ILE A 417      54.820 -26.600  91.470  1.00  0.00           C
ATOM   1894  HB  ILE A 417      54.880 -26.780  92.540  1.00  0.00           H
ATOM   1895  CG2 ILE A 417      54.510 -25.140  91.160  1.00  0.00           C
ATOM   1896 1HG2 ILE A 417      55.200 -24.430  91.610  1.00  0.00           H
ATOM   1897 2HG2 ILE A 417      54.380 -24.960  90.090  1.00  0.00           H
ATOM   1898 3HG2 ILE A 417      53.510 -24.990  91.580  1.00  0.00           H
ATOM   1899  CG1 ILE A 417      53.720 -27.610  90.960  1.00  0.00           C
ATOM   1900 1HG1 ILE A 417      54.140 -28.600  91.160  1.00  0.00           H
ATOM   1901 2HG1 ILE A 417      53.570 -27.400  89.900  1.00  0.00           H
ATOM   1902  CD  ILE A 417      52.450 -27.590  91.770  1.00  0.00           C
ATOM   1903  HD1 ILE A 417      52.700 -27.970  92.770  1.00  0.00           H
ATOM   1904  HD2 ILE A 417      52.190 -26.540  91.890  1.00  0.00           H
ATOM   1905  HD3 ILE A 417      51.680 -28.150  91.250  1.00  0.00           H
ATOM   1906  C   ILE A 417      57.340 -25.970  91.100  1.00  0.00           C
ATOM   1907  O   ILE A 417      57.350 -25.050  90.350  1.00  0.00           O
ATOM   1908  N   ALA A 418      58.230 -26.290  92.050  1.00  0.00           N
ATOM   1909  H   ALA A 418      58.090 -27.130  92.590  1.00  0.00           H
ATOM   1910  CA  ALA A 418      59.340 -25.510  92.460  1.00  0.00           C
ATOM   1911  HA  ALA A 418      59.180 -24.440  92.360  1.00  0.00           H
ATOM   1912  CB  ALA A 418      59.670 -25.910  93.890  1.00  0.00           C
ATOM   1913  HB1 ALA A 418      60.580 -25.390  94.180  1.00  0.00           H
ATOM   1914  HB2 ALA A 418      58.800 -25.650  94.480  1.00  0.00           H
ATOM   1915  HB3 ALA A 418      59.910 -26.970  94.020  1.00  0.00           H
ATOM   1916  C   ALA A 418      60.550 -25.790  91.500  1.00  0.00           C
ATOM   1917  O   ALA A 418      61.170 -24.770  91.130  1.00  0.00           O
ATOM   1918  N   ALA A 419      60.780 -27.070  91.060  1.00  0.00           N
ATOM   1919  H   ALA A 419      60.340 -27.800  91.610  1.00  0.00           H
ATOM   1920  CA  ALA A 419      61.660 -27.470  89.920  1.00  0.00           C
ATOM   1921  HA  ALA A 419      62.670 -27.050  90.020  1.00  0.00           H
ATOM   1922  CB  ALA A 419      61.890 -29.010  89.970  1.00  0.00           C
ATOM   1923  HB1 ALA A 419      60.990 -29.450  89.540  1.00  0.00           H
ATOM   1924  HB2 ALA A 419      62.820 -29.270  89.460  1.00  0.00           H
ATOM   1925  HB3 ALA A 419      62.030 -29.330  91.000  1.00  0.00           H
ATOM   1926  C   ALA A 419      61.190 -26.920  88.560  1.00  0.00           C
ATOM   1927  O   ALA A 419      62.100 -26.570  87.860  1.00  0.00           O
ATOM   1928  N   VAL A 420      59.880 -26.850  88.270  1.00  0.00           N
ATOM   1929  H   VAL A 420      59.200 -27.180  88.940  1.00  0.00           H
ATOM   1930  CA  VAL A 420      59.350 -26.230  87.030  1.00  0.00           C
ATOM   1931  HA  VAL A 420      59.930 -26.550  86.160  1.00  0.00           H
ATOM   1932  CB  VAL A 420      57.890 -26.630  86.810  1.00  0.00           C
ATOM   1933  HB  VAL A 420      57.240 -26.310  87.630  1.00  0.00           H
ATOM   1934  CG1 VAL A 420      57.320 -25.930  85.570  1.00  0.00           C
ATOM   1935 1HG1 VAL A 420      57.450 -24.850  85.680  1.00  0.00           H
ATOM   1936 2HG1 VAL A 420      57.830 -26.240  84.650  1.00  0.00           H
ATOM   1937 3HG1 VAL A 420      56.250 -26.130  85.560  1.00  0.00           H
ATOM   1938  CG2 VAL A 420      57.720 -28.150  86.580  1.00  0.00           C
ATOM   1939 1HG2 VAL A 420      56.720 -28.540  86.390  1.00  0.00           H
ATOM   1940 2HG2 VAL A 420      58.370 -28.470  85.760  1.00  0.00           H
ATOM   1941 3HG2 VAL A 420      58.030 -28.770  87.430  1.00  0.00           H
ATOM   1942  C   VAL A 420      59.540 -24.730  87.080  1.00  0.00           C
ATOM   1943  O   VAL A 420      59.930 -24.070  86.120  1.00  0.00           O
ATOM   1944  N   CYS A 421      59.400 -24.120  88.250  1.00  0.00           N
ATOM   1945  H   CYS A 421      59.190 -24.660  89.080  1.00  0.00           H
ATOM   1946  CA  CYS A 421      59.630 -22.680  88.470  1.00  0.00           C
ATOM   1947  HA  CYS A 421      59.170 -22.020  87.730  1.00  0.00           H
ATOM   1948  CB  CYS A 421      59.070 -22.290  89.830  1.00  0.00           C
ATOM   1949  HB1 CYS A 421      59.460 -21.320  90.130  1.00  0.00           H
ATOM   1950  HB2 CYS A 421      59.430 -23.050  90.530  1.00  0.00           H
ATOM   1951  SG  CYS A 421      57.290 -22.290  89.650  1.00  0.00           S
ATOM   1952  HG  CYS A 421      56.920 -23.550  89.890  1.00  0.00           H
ATOM   1953  C   CYS A 421      61.160 -22.360  88.400  1.00  0.00           C
ATOM   1954  O   CYS A 421      61.570 -21.390  87.700  1.00  0.00           O
ATOM   1955  N   LEU A 422      61.980 -23.270  88.890  1.00  0.00           N
ATOM   1956  H   LEU A 422      61.640 -24.030  89.450  1.00  0.00           H
ATOM   1957  CA  LEU A 422      63.500 -23.120  88.870  1.00  0.00           C
ATOM   1958  HA  LEU A 422      63.760 -22.130  89.250  1.00  0.00           H
ATOM   1959  CB  LEU A 422      64.250 -24.200  89.730  1.00  0.00           C
ATOM   1960  HB1 LEU A 422      63.960 -25.180  89.350  1.00  0.00           H
ATOM   1961  HB2 LEU A 422      63.790 -24.100  90.710  1.00  0.00           H
ATOM   1962  CG  LEU A 422      65.810 -24.220  89.830  1.00  0.00           C
ATOM   1963  HG  LEU A 422      66.350 -24.120  88.890  1.00  0.00           H
ATOM   1964  CD1 LEU A 422      66.340 -23.000  90.670  1.00  0.00           C
ATOM   1965 1HD1 LEU A 422      67.410 -22.930  90.460  1.00  0.00           H
ATOM   1966 2HD1 LEU A 422      65.780 -22.180  90.210  1.00  0.00           H
ATOM   1967 3HD1 LEU A 422      66.150 -23.200  91.720  1.00  0.00           H
ATOM   1968  CD2 LEU A 422      66.360 -25.380  90.590  1.00  0.00           C
ATOM   1969 1HD2 LEU A 422      67.430 -25.260  90.720  1.00  0.00           H
ATOM   1970 2HD2 LEU A 422      65.860 -25.510  91.550  1.00  0.00           H
ATOM   1971 3HD2 LEU A 422      66.130 -26.220  89.930  1.00  0.00           H
ATOM   1972  C   LEU A 422      64.020 -23.150  87.440  1.00  0.00           C
ATOM   1973  O   LEU A 422      64.820 -22.240  87.130  1.00  0.00           O
ATOM   1974  N   ALA A 423      63.540 -24.040  86.650  1.00  0.00           N
ATOM   1975  H   ALA A 423      62.850 -24.700  86.970  1.00  0.00           H
ATOM   1976  CA  ALA A 423      63.780 -24.020  85.190  1.00  0.00           C
ATOM   1977  HA  ALA A 423      64.840 -24.160  85.020  1.00  0.00           H
ATOM   1978  CB  ALA A 423      63.240 -25.360  84.760  1.00  0.00           C
ATOM   1979  HB1 ALA A 423      63.580 -25.380  83.730  1.00  0.00           H
ATOM   1980  HB2 ALA A 423      63.500 -26.210  85.390  1.00  0.00           H
ATOM   1981  HB3 ALA A 423      62.150 -25.360  84.890  1.00  0.00           H
ATOM   1982  C   ALA A 423      63.270 -22.800  84.450  1.00  0.00           C
ATOM   1983  O   ALA A 423      64.080 -22.190  83.760  1.00  0.00           O
ATOM   1984  N   VAL A 424      61.930 -22.450  84.540  1.00  0.00           N
ATOM   1985  H   VAL A 424      61.370 -22.950  85.210  1.00  0.00           H
ATOM   1986  CA  VAL A 424      61.450 -21.300  83.790  1.00  0.00           C
ATOM   1987  HA  VAL A 424      61.570 -21.520  82.730  1.00  0.00           H
ATOM   1988  CB  VAL A 424      59.940 -21.090  83.830  1.00  0.00           C
ATOM   1989  HB  VAL A 424      59.620 -20.960  84.870  1.00  0.00           H
ATOM   1990  CG1 VAL A 424      59.490 -19.840  83.080  1.00  0.00           C
ATOM   1991 1HG1 VAL A 424      58.400 -19.850  83.050  1.00  0.00           H
ATOM   1992 2HG1 VAL A 424      59.820 -18.980  83.660  1.00  0.00           H
ATOM   1993 3HG1 VAL A 424      59.930 -19.920  82.080  1.00  0.00           H
ATOM   1994  CG2 VAL A 424      59.120 -22.300  83.310  1.00  0.00           C
ATOM   1995 1HG2 VAL A 424      59.240 -23.090  84.060  1.00  0.00           H
ATOM   1996 2HG2 VAL A 424      58.060 -22.090  83.190  1.00  0.00           H
ATOM   1997 3HG2 VAL A 424      59.570 -22.550  82.350  1.00  0.00           H
ATOM   1998  C   VAL A 424      62.160 -20.040  84.200  1.00  0.00           C
ATOM   1999  O   VAL A 424      62.670 -19.330  83.350  1.00  0.00           O
ATOM   2000  N   LEU A 425      62.470 -19.860  85.480  1.00  0.00           N
ATOM   2001  H   LEU A 425      62.070 -20.530  86.120  1.00  0.00           H
ATOM   2002  CA  LEU A 425      63.090 -18.690  85.950  1.00  0.00           C
ATOM   2003  HA  LEU A 425      62.680 -17.870  85.350  1.00  0.00           H
ATOM   2004  CB  LEU A 425      62.900 -18.430  87.450  1.00  0.00           C
ATOM   2005  HB1 LEU A 425      63.540 -17.610  87.760  1.00  0.00           H
ATOM   2006  HB2 LEU A 425      63.130 -19.360  87.980  1.00  0.00           H
ATOM   2007  CG  LEU A 425      61.450 -17.940  87.710  1.00  0.00           C
ATOM   2008  HG  LEU A 425      60.690 -18.290  87.010  1.00  0.00           H
ATOM   2009  CD1 LEU A 425      61.050 -18.260  89.100  1.00  0.00           C
ATOM   2010 1HD1 LEU A 425      60.900 -19.340  89.150  1.00  0.00           H
ATOM   2011 2HD1 LEU A 425      61.790 -18.020  89.860  1.00  0.00           H
ATOM   2012 3HD1 LEU A 425      60.180 -17.660  89.380  1.00  0.00           H
ATOM   2013  CD2 LEU A 425      61.340 -16.440  87.540  1.00  0.00           C
ATOM   2014 1HD2 LEU A 425      62.010 -15.850  88.180  1.00  0.00           H
ATOM   2015 2HD2 LEU A 425      61.630 -16.240  86.510  1.00  0.00           H
ATOM   2016 3HD2 LEU A 425      60.320 -16.080  87.700  1.00  0.00           H
ATOM   2017  C   LEU A 425      64.570 -18.680  85.650  1.00  0.00           C
ATOM   2018  O   LEU A 425      65.080 -17.540  85.530  1.00  0.00           O
ATOM   2019  N   GLN A 426      65.290 -19.740  85.440  1.00  0.00           N
ATOM   2020  H   GLN A 426      64.810 -20.620  85.560  1.00  0.00           H
ATOM   2021  CA  GLN A 426      66.660 -19.690  84.850  1.00  0.00           C
ATOM   2022  HA  GLN A 426      67.240 -19.030  85.480  1.00  0.00           H
ATOM   2023  CB  GLN A 426      67.230 -21.140  84.900  1.00  0.00           C
ATOM   2024  HB1 GLN A 426      67.980 -21.230  84.110  1.00  0.00           H
ATOM   2025  HB2 GLN A 426      66.480 -21.860  84.550  1.00  0.00           H
ATOM   2026  CG  GLN A 426      67.900 -21.640  86.220  1.00  0.00           C
ATOM   2027  HG1 GLN A 426      67.240 -21.340  87.030  1.00  0.00           H
ATOM   2028  HG2 GLN A 426      68.840 -21.110  86.350  1.00  0.00           H
ATOM   2029  CD  GLN A 426      68.190 -23.120  86.160  1.00  0.00           C
ATOM   2030  OE1 GLN A 426      69.310 -23.560  85.810  1.00  0.00           O
ATOM   2031  NE2 GLN A 426      67.170 -23.910  86.440  1.00  0.00           N
ATOM   2032 1HE2 GLN A 426      66.360 -23.420  86.790  1.00  0.00           H
ATOM   2033 2HE2 GLN A 426      67.210 -24.920  86.340  1.00  0.00           H
ATOM   2034  C   GLN A 426      66.650 -19.100  83.400  1.00  0.00           C
ATOM   2035  O   GLN A 426      67.650 -18.440  83.080  1.00  0.00           O
ATOM   2036  N   ALA A 427      65.600 -19.220  82.660  1.00  0.00           N
ATOM   2037  H   ALA A 427      64.840 -19.760  83.050  1.00  0.00           H
ATOM   2038  CA  ALA A 427      65.570 -18.640  81.310  1.00  0.00           C
ATOM   2039  HA  ALA A 427      66.520 -18.680  80.770  1.00  0.00           H
ATOM   2040  CB  ALA A 427      64.650 -19.500  80.450  1.00  0.00           C
ATOM   2041  HB1 ALA A 427      63.620 -19.390  80.800  1.00  0.00           H
ATOM   2042  HB2 ALA A 427      64.700 -19.150  79.420  1.00  0.00           H
ATOM   2043  HB3 ALA A 427      64.940 -20.550  80.430  1.00  0.00           H
ATOM   2044  C   ALA A 427      65.110 -17.170  81.410  1.00  0.00           C
ATOM   2045  O   ALA A 427      65.750 -16.280  80.830  1.00  0.00           O
ATOM   2046  N   LEU A 428      63.970 -16.900  82.090  1.00  0.00           N
ATOM   2047  H   LEU A 428      63.550 -17.710  82.530  1.00  0.00           H
ATOM   2048  CA  LEU A 428      63.510 -15.550  82.220  1.00  0.00           C
ATOM   2049  HA  LEU A 428      63.210 -15.270  81.210  1.00  0.00           H
ATOM   2050  CB  LEU A 428      62.220 -15.520  83.080  1.00  0.00           C
ATOM   2051  HB1 LEU A 428      61.910 -14.480  83.170  1.00  0.00           H
ATOM   2052  HB2 LEU A 428      62.400 -16.020  84.030  1.00  0.00           H
ATOM   2053  CG  LEU A 428      61.020 -16.280  82.460  1.00  0.00           C
ATOM   2054  HG  LEU A 428      61.220 -17.360  82.510  1.00  0.00           H
ATOM   2055  CD1 LEU A 428      59.750 -15.860  83.210  1.00  0.00           C
ATOM   2056 1HD1 LEU A 428      59.930 -15.880  84.280  1.00  0.00           H
ATOM   2057 2HD1 LEU A 428      59.310 -14.960  82.770  1.00  0.00           H
ATOM   2058 3HD1 LEU A 428      58.940 -16.560  83.020  1.00  0.00           H
ATOM   2059  CD2 LEU A 428      60.870 -16.150  80.970  1.00  0.00           C
ATOM   2060 1HD2 LEU A 428      59.930 -16.600  80.660  1.00  0.00           H
ATOM   2061 2HD2 LEU A 428      60.960 -15.130  80.580  1.00  0.00           H
ATOM   2062 3HD2 LEU A 428      61.660 -16.720  80.480  1.00  0.00           H
ATOM   2063  C   LEU A 428      64.550 -14.600  82.770  1.00  0.00           C
ATOM   2064  O   LEU A 428      64.680 -13.480  82.280  1.00  0.00           O
ATOM   2065  N   SER A 429      65.420 -15.090  83.650  1.00  0.00           N
ATOM   2066  H   SER A 429      65.310 -16.070  83.870  1.00  0.00           H
ATOM   2067  CA  SER A 429      66.460 -14.220  84.270  1.00  0.00           C
ATOM   2068  HA  SER A 429      65.990 -13.280  84.540  1.00  0.00           H
ATOM   2069  CB  SER A 429      67.000 -14.840  85.520  1.00  0.00           C
ATOM   2070  HB1 SER A 429      67.560 -14.090  86.080  1.00  0.00           H
ATOM   2071  HB2 SER A 429      67.640 -15.700  85.320  1.00  0.00           H
ATOM   2072  OG  SER A 429      66.030 -15.230  86.470  1.00  0.00           O
ATOM   2073  HG  SER A 429      65.740 -16.090  86.150  1.00  0.00           H
ATOM   2074  C   SER A 429      67.510 -13.750  83.250  1.00  0.00           C
ATOM   2075  O   SER A 429      68.250 -12.830  83.470  1.00  0.00           O
ATOM   2076  N   VAL A 430      67.740 -14.600  82.260  1.00  0.00           N
ATOM   2077  H   VAL A 430      67.000 -15.270  82.120  1.00  0.00           H
ATOM   2078  CA  VAL A 430      68.790 -14.360  81.200  1.00  0.00           C
ATOM   2079  HA  VAL A 430      69.510 -13.650  81.620  1.00  0.00           H
ATOM   2080  CB  VAL A 430      69.640 -15.550  80.830  1.00  0.00           C
ATOM   2081  HB  VAL A 430      70.390 -15.230  80.110  1.00  0.00           H
ATOM   2082  CG1 VAL A 430      70.420 -16.040  82.050  1.00  0.00           C
ATOM   2083 1HG1 VAL A 430      70.950 -16.980  81.860  1.00  0.00           H
ATOM   2084 2HG1 VAL A 430      71.090 -15.310  82.510  1.00  0.00           H
ATOM   2085 3HG1 VAL A 430      69.740 -16.190  82.890  1.00  0.00           H
ATOM   2086  CG2 VAL A 430      68.890 -16.620  80.080  1.00  0.00           C
ATOM   2087 1HG2 VAL A 430      68.280 -16.250  79.270  1.00  0.00           H
ATOM   2088 2HG2 VAL A 430      69.590 -17.410  79.810  1.00  0.00           H
ATOM   2089 3HG2 VAL A 430      68.230 -17.140  80.780  1.00  0.00           H
ATOM   2090  C   VAL A 430      68.220 -13.680  79.960  1.00  0.00           C
ATOM   2091  O   VAL A 430      68.970 -12.850  79.460  1.00  0.00           O
ATOM   2092  N   LEU A 431      66.970 -13.900  79.610  1.00  0.00           N
ATOM   2093  H   LEU A 431      66.480 -14.570  80.180  1.00  0.00           H
ATOM   2094  CA  LEU A 431      66.090 -13.210  78.620  1.00  0.00           C
ATOM   2095  HA  LEU A 431      66.650 -13.220  77.680  1.00  0.00           H
ATOM   2096  CB  LEU A 431      64.830 -14.080  78.470  1.00  0.00           C
ATOM   2097  HB1 LEU A 431      64.070 -13.410  78.060  1.00  0.00           H
ATOM   2098  HB2 LEU A 431      64.420 -14.310  79.450  1.00  0.00           H
ATOM   2099  CG  LEU A 431      65.040 -15.440  77.690  1.00  0.00           C
ATOM   2100  HG  LEU A 431      65.700 -16.100  78.260  1.00  0.00           H
ATOM   2101  CD1 LEU A 431      63.660 -16.080  77.620  1.00  0.00           C
ATOM   2102 1HD1 LEU A 431      63.810 -17.050  77.130  1.00  0.00           H
ATOM   2103 2HD1 LEU A 431      63.390 -16.410  78.620  1.00  0.00           H
ATOM   2104 3HD1 LEU A 431      62.930 -15.360  77.250  1.00  0.00           H
ATOM   2105  CD2 LEU A 431      65.560 -15.340  76.290  1.00  0.00           C
ATOM   2106 1HD2 LEU A 431      66.440 -14.720  76.170  1.00  0.00           H
ATOM   2107 2HD2 LEU A 431      65.910 -16.310  75.930  1.00  0.00           H
ATOM   2108 3HD2 LEU A 431      64.740 -14.950  75.680  1.00  0.00           H
ATOM   2109  C   LEU A 431      65.790 -11.760  79.040  1.00  0.00           C
ATOM   2110  O   LEU A 431      65.990 -10.890  78.210  1.00  0.00           O
ATOM   2111  N   HIS A 432      65.340 -11.490  80.250  1.00  0.00           N
ATOM   2112  H   HIS A 432      65.120 -12.230  80.900  1.00  0.00           H
ATOM   2113  CA  HIS A 432      65.020 -10.160  80.630  1.00  0.00           C
ATOM   2114  HA  HIS A 432      64.390  -9.730  79.850  1.00  0.00           H
ATOM   2115  CB  HIS A 432      64.300 -10.230  82.000  1.00  0.00           C
ATOM   2116  HB1 HIS A 432      64.110  -9.300  82.550  1.00  0.00           H
ATOM   2117  HB2 HIS A 432      64.940 -10.770  82.700  1.00  0.00           H
ATOM   2118  CG  HIS A 432      62.910 -10.900  82.000  1.00  0.00           C
ATOM   2119  ND1 HIS A 432      62.090 -10.960  83.070  1.00  0.00           N
ATOM   2120  CE1 HIS A 432      61.000 -11.590  82.590  1.00  0.00           C
ATOM   2121  HE1 HIS A 432      60.110 -11.790  83.170  1.00  0.00           H
ATOM   2122  NE2 HIS A 432      61.090 -11.890  81.280  1.00  0.00           N
ATOM   2123  HE2 HIS A 432      60.290 -12.120  80.700  1.00  0.00           H
ATOM   2124  CD2 HIS A 432      62.350 -11.520  80.920  1.00  0.00           C
ATOM   2125  HD2 HIS A 432      62.830 -11.480  79.960  1.00  0.00           H
ATOM   2126  C   HIS A 432      66.240  -9.230  80.680  1.00  0.00           C
ATOM   2127  O   HIS A 432      66.080  -8.000  80.400  1.00  0.00           O
ATOM   2128  N   ALA A 433      67.420  -9.850  80.900  1.00  0.00           N
ATOM   2129  H   ALA A 433      67.410 -10.790  81.270  1.00  0.00           H
ATOM   2130  CA  ALA A 433      68.710  -9.160  80.960  1.00  0.00           C
ATOM   2131  HA  ALA A 433      68.690  -8.280  81.600  1.00  0.00           H
ATOM   2132  CB  ALA A 433      69.750 -10.130  81.560  1.00  0.00           C
ATOM   2133  HB1 ALA A 433      70.700  -9.670  81.830  1.00  0.00           H
ATOM   2134  HB2 ALA A 433      69.390 -10.520  82.510  1.00  0.00           H
ATOM   2135  HB3 ALA A 433      69.900 -10.890  80.790  1.00  0.00           H
ATOM   2136  C   ALA A 433      69.160  -8.720  79.590  1.00  0.00           C
ATOM   2137  O   ALA A 433      69.900  -7.740  79.480  1.00  0.00           O
ATOM   2138  N   GLN A 434      68.540  -9.310  78.530  1.00  0.00           N
ATOM   2139  H   GLN A 434      67.900 -10.070  78.710  1.00  0.00           H
ATOM   2140  CA  GLN A 434      68.700  -8.920  77.140  1.00  0.00           C
ATOM   2141  HA  GLN A 434      69.630  -8.370  77.020  1.00  0.00           H
ATOM   2142  CB  GLN A 434      68.930 -10.230  76.340  1.00  0.00           C
ATOM   2143  HB1 GLN A 434      68.710 -10.030  75.290  1.00  0.00           H
ATOM   2144  HB2 GLN A 434      68.150 -10.910  76.700  1.00  0.00           H
ATOM   2145  CG  GLN A 434      70.350 -10.750  76.500  1.00  0.00           C
ATOM   2146  HG1 GLN A 434      70.300 -11.770  76.130  1.00  0.00           H
ATOM   2147  HG2 GLN A 434      70.610 -10.910  77.540  1.00  0.00           H
ATOM   2148  CD  GLN A 434      71.450 -10.000  75.730  1.00  0.00           C
ATOM   2149  OE1 GLN A 434      71.300  -8.930  75.220  1.00  0.00           O
ATOM   2150  NE2 GLN A 434      72.650 -10.520  75.670  1.00  0.00           N
ATOM   2151 1HE2 GLN A 434      72.740 -11.480  75.980  1.00  0.00           H
ATOM   2152 2HE2 GLN A 434      73.390  -9.950  75.280  1.00  0.00           H
ATOM   2153  C   GLN A 434      67.410  -8.140  76.650  1.00  0.00           C
ATOM   2154  O   GLN A 434      67.270  -7.800  75.480  1.00  0.00           O
ATOM   2155  N   GLY A 435      66.510  -7.810  77.530  1.00  0.00           N
ATOM   2156  H   GLY A 435      66.670  -8.120  78.470  1.00  0.00           H
ATOM   2157  CA  GLY A 435      65.240  -7.040  77.250  1.00  0.00           C
ATOM   2158  HA1 GLY A 435      65.450  -6.040  76.870  1.00  0.00           H
ATOM   2159  HA2 GLY A 435      64.800  -6.840  78.230  1.00  0.00           H
ATOM   2160  C   GLY A 435      64.170  -7.830  76.490  1.00  0.00           C
ATOM   2161  O   GLY A 435      63.270  -7.180  76.050  1.00  0.00           O
ATOM   2162  N   VAL A 436      64.360  -9.110  76.280  1.00  0.00           N
ATOM   2163  H   VAL A 436      65.190  -9.580  76.610  1.00  0.00           H
ATOM   2164  CA  VAL A 436      63.400  -9.990  75.520  1.00  0.00           C
ATOM   2165  HA  VAL A 436      63.200  -9.600  74.520  1.00  0.00           H
ATOM   2166  CB  VAL A 436      64.030 -11.400  75.370  1.00  0.00           C
ATOM   2167  HB  VAL A 436      64.320 -11.880  76.310  1.00  0.00           H
ATOM   2168  CG1 VAL A 436      63.030 -12.470  74.700  1.00  0.00           C
ATOM   2169 1HG1 VAL A 436      63.430 -13.480  74.590  1.00  0.00           H
ATOM   2170 2HG1 VAL A 436      62.160 -12.640  75.340  1.00  0.00           H
ATOM   2171 3HG1 VAL A 436      62.800 -12.050  73.720  1.00  0.00           H
ATOM   2172  CG2 VAL A 436      65.330 -11.250  74.550  1.00  0.00           C
ATOM   2173 1HG2 VAL A 436      66.200 -10.880  75.080  1.00  0.00           H
ATOM   2174 2HG2 VAL A 436      65.490 -12.180  74.010  1.00  0.00           H
ATOM   2175 3HG2 VAL A 436      65.060 -10.510  73.790  1.00  0.00           H
ATOM   2176  C   VAL A 436      62.110 -10.140  76.280  1.00  0.00           C
ATOM   2177  O   VAL A 436      62.110 -10.630  77.350  1.00  0.00           O
ATOM   2178  N   ILE A 437      61.000  -9.570  75.710  1.00  0.00           N
ATOM   2179  H   ILE A 437      61.080  -9.180  74.780  1.00  0.00           H
ATOM   2180  CA  ILE A 437      59.640  -9.780  76.220  1.00  0.00           C
ATOM   2181  HA  ILE A 437      59.640 -10.110  77.260  1.00  0.00           H
ATOM   2182  CB  ILE A 437      58.700  -8.540  76.090  1.00  0.00           C
ATOM   2183  HB  ILE A 437      58.650  -8.380  75.010  1.00  0.00           H
ATOM   2184  CG2 ILE A 437      57.410  -8.910  76.830  1.00  0.00           C
ATOM   2185 1HG2 ILE A 437      56.860  -9.640  76.230  1.00  0.00           H
ATOM   2186 2HG2 ILE A 437      57.550  -9.320  77.820  1.00  0.00           H
ATOM   2187 3HG2 ILE A 437      56.760  -8.040  76.900  1.00  0.00           H
ATOM   2188  CG1 ILE A 437      59.330  -7.290  76.810  1.00  0.00           C
ATOM   2189 1HG1 ILE A 437      60.230  -6.960  76.290  1.00  0.00           H
ATOM   2190 2HG1 ILE A 437      59.610  -7.610  77.810  1.00  0.00           H
ATOM   2191  CD  ILE A 437      58.480  -6.050  76.940  1.00  0.00           C
ATOM   2192  HD1 ILE A 437      58.010  -5.830  75.980  1.00  0.00           H
ATOM   2193  HD2 ILE A 437      57.650  -6.250  77.620  1.00  0.00           H
ATOM   2194  HD3 ILE A 437      59.010  -5.170  77.290  1.00  0.00           H
ATOM   2195  C   ILE A 437      59.080 -10.880  75.290  1.00  0.00           C
ATOM   2196  O   ILE A 437      59.130 -10.660  74.080  1.00  0.00           O
ATOM   2197  N   HIS A 438      58.540 -11.920  75.850  1.00  0.00           N
ATOM   2198  H   HIS A 438      58.520 -11.950  76.860  1.00  0.00           H
ATOM   2199  CA  HIS A 438      57.910 -12.980  75.130  1.00  0.00           C
ATOM   2200  HA  HIS A 438      58.320 -13.100  74.130  1.00  0.00           H
ATOM   2201  CB  HIS A 438      58.230 -14.260  75.930  1.00  0.00           C
ATOM   2202  HB1 HIS A 438      57.890 -14.090  76.960  1.00  0.00           H
ATOM   2203  HB2 HIS A 438      59.290 -14.510  76.020  1.00  0.00           H
ATOM   2204  CG  HIS A 438      57.490 -15.470  75.510  1.00  0.00           C
ATOM   2205  ND1 HIS A 438      56.220 -15.580  75.110  1.00  0.00           N
ATOM   2206  CE1 HIS A 438      55.900 -16.810  74.880  1.00  0.00           C
ATOM   2207  HE1 HIS A 438      54.910 -17.230  74.760  1.00  0.00           H
ATOM   2208  NE2 HIS A 438      56.990 -17.580  75.140  1.00  0.00           N
ATOM   2209  HE2 HIS A 438      57.110 -18.580  75.110  1.00  0.00           H
ATOM   2210  CD2 HIS A 438      58.040 -16.720  75.440  1.00  0.00           C
ATOM   2211  HD2 HIS A 438      59.070 -17.020  75.580  1.00  0.00           H
ATOM   2212  C   HIS A 438      56.420 -12.690  74.910  1.00  0.00           C
ATOM   2213  O   HIS A 438      55.880 -13.030  73.810  1.00  0.00           O
ATOM   2214  N   ARG A 439      55.700 -12.080  75.910  1.00  0.00           N
ATOM   2215  H   ARG A 439      56.130 -11.970  76.820  1.00  0.00           H
ATOM   2216  CA  ARG A 439      54.370 -11.590  75.780  1.00  0.00           C
ATOM   2217  HA  ARG A 439      54.050 -11.350  76.800  1.00  0.00           H
ATOM   2218  CB  ARG A 439      54.330 -10.170  75.160  1.00  0.00           C
ATOM   2219  HB1 ARG A 439      54.920  -9.580  75.860  1.00  0.00           H
ATOM   2220  HB2 ARG A 439      53.300  -9.810  75.140  1.00  0.00           H
ATOM   2221  CG  ARG A 439      54.890 -10.040  73.770  1.00  0.00           C
ATOM   2222  HG1 ARG A 439      54.470 -10.810  73.130  1.00  0.00           H
ATOM   2223  HG2 ARG A 439      55.970 -10.200  73.700  1.00  0.00           H
ATOM   2224  CD  ARG A 439      54.660  -8.640  73.150  1.00  0.00           C
ATOM   2225  HD1 ARG A 439      55.010  -7.920  73.890  1.00  0.00           H
ATOM   2226  HD2 ARG A 439      53.580  -8.480  73.120  1.00  0.00           H
ATOM   2227  NE  ARG A 439      55.300  -8.610  71.900  1.00  0.00           N
ATOM   2228  HE  ARG A 439      55.550  -9.450  71.390  1.00  0.00           H
ATOM   2229  CZ  ARG A 439      55.520  -7.540  71.160  1.00  0.00           C
ATOM   2230  NH1 ARG A 439      55.880  -7.670  69.950  1.00  0.00           N
ATOM   2231 1HH1 ARG A 439      56.160  -8.540  69.540  1.00  0.00           H
ATOM   2232 2HH1 ARG A 439      56.050  -6.820  69.430  1.00  0.00           H
ATOM   2233  NH2 ARG A 439      55.410  -6.340  71.570  1.00  0.00           N
ATOM   2234 1HH2 ARG A 439      54.990  -6.030  72.440  1.00  0.00           H
ATOM   2235 2HH2 ARG A 439      55.430  -5.640  70.830  1.00  0.00           H
ATOM   2236  C   ARG A 439      53.320 -12.590  75.280  1.00  0.00           C
ATOM   2237  O   ARG A 439      52.260 -12.130  74.850  1.00  0.00           O
ATOM   2238  N   ASP A 440      53.530 -13.940  75.280  1.00  0.00           N
ATOM   2239  H   ASP A 440      54.510 -14.180  75.240  1.00  0.00           H
ATOM   2240  CA  ASP A 440      52.500 -14.920  74.950  1.00  0.00           C
ATOM   2241  HA  ASP A 440      51.550 -14.410  75.020  1.00  0.00           H
ATOM   2242  CB  ASP A 440      52.620 -15.320  73.500  1.00  0.00           C
ATOM   2243  HB1 ASP A 440      53.460 -16.010  73.350  1.00  0.00           H
ATOM   2244  HB2 ASP A 440      52.870 -14.390  72.990  1.00  0.00           H
ATOM   2245  CG  ASP A 440      51.350 -15.870  72.880  1.00  0.00           C
ATOM   2246  OD1 ASP A 440      50.290 -15.230  72.980  1.00  0.00           O
ATOM   2247  OD2 ASP A 440      51.410 -16.820  72.120  1.00  0.00           O
ATOM   2248  C   ASP A 440      52.440 -16.190  75.850  1.00  0.00           C
ATOM   2249  O   ASP A 440      51.910 -17.220  75.500  1.00  0.00           O
ATOM   2250  N   ILE A 441      53.150 -16.040  76.970  1.00  0.00           N
ATOM   2251  H   ILE A 441      53.510 -15.130  77.220  1.00  0.00           H
ATOM   2252  CA  ILE A 441      53.290 -17.200  77.890  1.00  0.00           C
ATOM   2253  HA  ILE A 441      53.660 -17.960  77.210  1.00  0.00           H
ATOM   2254  CB  ILE A 441      54.240 -17.020  79.030  1.00  0.00           C
ATOM   2255  HB  ILE A 441      53.890 -16.170  79.620  1.00  0.00           H
ATOM   2256  CG2 ILE A 441      54.320 -18.210  80.030  1.00  0.00           C
ATOM   2257 1HG2 ILE A 441      54.410 -19.190  79.570  1.00  0.00           H
ATOM   2258 2HG2 ILE A 441      55.100 -17.960  80.750  1.00  0.00           H
ATOM   2259 3HG2 ILE A 441      53.420 -18.230  80.630  1.00  0.00           H
ATOM   2260  CG1 ILE A 441      55.590 -16.660  78.400  1.00  0.00           C
ATOM   2261 1HG1 ILE A 441      55.510 -15.710  77.870  1.00  0.00           H
ATOM   2262 2HG1 ILE A 441      55.830 -17.490  77.730  1.00  0.00           H
ATOM   2263  CD  ILE A 441      56.830 -16.560  79.350  1.00  0.00           C
ATOM   2264  HD1 ILE A 441      56.610 -15.840  80.130  1.00  0.00           H
ATOM   2265  HD2 ILE A 441      56.960 -17.520  79.850  1.00  0.00           H
ATOM   2266  HD3 ILE A 441      57.710 -16.270  78.780  1.00  0.00           H
ATOM   2267  C   ILE A 441      51.930 -17.690  78.470  1.00  0.00           C
ATOM   2268  O   ILE A 441      51.030 -16.990  78.900  1.00  0.00           O
ATOM   2269  N   LYS A 442      51.770 -19.010  78.490  1.00  0.00           N
ATOM   2270  H   LYS A 442      52.440 -19.550  77.960  1.00  0.00           H
ATOM   2271  CA  LYS A 442      50.850 -19.830  79.290  1.00  0.00           C
ATOM   2272  HA  LYS A 442      50.590 -19.220  80.150  1.00  0.00           H
ATOM   2273  CB  LYS A 442      49.590 -19.930  78.410  1.00  0.00           C
ATOM   2274  HB1 LYS A 442      49.090 -18.970  78.390  1.00  0.00           H
ATOM   2275  HB2 LYS A 442      48.980 -20.650  78.950  1.00  0.00           H
ATOM   2276  CG  LYS A 442      49.770 -20.520  76.920  1.00  0.00           C
ATOM   2277  HG1 LYS A 442      50.300 -21.470  76.990  1.00  0.00           H
ATOM   2278  HG2 LYS A 442      50.290 -19.760  76.330  1.00  0.00           H
ATOM   2279  CD  LYS A 442      48.440 -21.010  76.320  1.00  0.00           C
ATOM   2280  HD1 LYS A 442      48.150 -21.880  76.910  1.00  0.00           H
ATOM   2281  HD2 LYS A 442      48.610 -21.190  75.260  1.00  0.00           H
ATOM   2282  CE  LYS A 442      47.360 -19.930  76.590  1.00  0.00           C
ATOM   2283  HE1 LYS A 442      47.680 -18.950  76.220  1.00  0.00           H
ATOM   2284  HE2 LYS A 442      47.100 -19.840  77.640  1.00  0.00           H
ATOM   2285  NZ  LYS A 442      46.110 -20.260  75.930  1.00  0.00           N
ATOM   2286  HZ1 LYS A 442      46.310 -20.400  74.950  1.00  0.00           H
ATOM   2287  HZ2 LYS A 442      45.620 -21.050  76.320  1.00  0.00           H
ATOM   2288  HZ3 LYS A 442      45.420 -19.520  75.950  1.00  0.00           H
ATOM   2289  C   LYS A 442      51.450 -21.190  79.650  1.00  0.00           C
ATOM   2290  O   LYS A 442      52.590 -21.460  79.290  1.00  0.00           O
ATOM   2291  N   SER A 443      50.710 -22.100  80.300  1.00  0.00           N
ATOM   2292  H   SER A 443      49.780 -21.810  80.570  1.00  0.00           H
ATOM   2293  CA  SER A 443      51.280 -23.420  80.690  1.00  0.00           C
ATOM   2294  HA  SER A 443      52.180 -23.250  81.290  1.00  0.00           H
ATOM   2295  CB  SER A 443      50.340 -24.220  81.580  1.00  0.00           C
ATOM   2296  HB1 SER A 443      50.910 -25.090  81.900  1.00  0.00           H
ATOM   2297  HB2 SER A 443      49.390 -24.530  81.130  1.00  0.00           H
ATOM   2298  OG  SER A 443      50.130 -23.400  82.640  1.00  0.00           O
ATOM   2299  HG  SER A 443      49.410 -22.790  82.460  1.00  0.00           H
ATOM   2300  C   SER A 443      51.510 -24.260  79.450  1.00  0.00           C
ATOM   2301  O   SER A 443      52.530 -25.030  79.440  1.00  0.00           O
ATOM   2302  N   ASP A 444      50.700 -24.200  78.390  1.00  0.00           N
ATOM   2303  H   ASP A 444      49.830 -23.710  78.560  1.00  0.00           H
ATOM   2304  CA  ASP A 444      50.960 -24.900  77.150  1.00  0.00           C
ATOM   2305  HA  ASP A 444      51.060 -25.940  77.430  1.00  0.00           H
ATOM   2306  CB  ASP A 444      49.730 -24.920  76.230  1.00  0.00           C
ATOM   2307  HB1 ASP A 444      49.990 -25.400  75.290  1.00  0.00           H
ATOM   2308  HB2 ASP A 444      49.480 -23.910  75.920  1.00  0.00           H
ATOM   2309  CG  ASP A 444      48.540 -25.560  76.910  1.00  0.00           C
ATOM   2310  OD1 ASP A 444      48.460 -26.810  77.010  1.00  0.00           O
ATOM   2311  OD2 ASP A 444      47.550 -24.880  77.370  1.00  0.00           O
ATOM   2312  C   ASP A 444      52.260 -24.390  76.400  1.00  0.00           C
ATOM   2313  O   ASP A 444      52.800 -25.120  75.620  1.00  0.00           O
ATOM   2314  N   SER A 445      52.770 -23.220  76.900  1.00  0.00           N
ATOM   2315  H   SER A 445      52.370 -22.720  77.680  1.00  0.00           H
ATOM   2316  CA  SER A 445      54.060 -22.710  76.370  1.00  0.00           C
ATOM   2317  HA  SER A 445      54.160 -23.020  75.330  1.00  0.00           H
ATOM   2318  CB  SER A 445      54.050 -21.270  76.230  1.00  0.00           C
ATOM   2319  HB1 SER A 445      54.950 -21.010  75.670  1.00  0.00           H
ATOM   2320  HB2 SER A 445      54.090 -20.760  77.190  1.00  0.00           H
ATOM   2321  OG  SER A 445      52.910 -20.860  75.520  1.00  0.00           O
ATOM   2322  HG  SER A 445      52.970 -21.400  74.730  1.00  0.00           H
ATOM   2323  C   SER A 445      55.310 -23.330  76.990  1.00  0.00           C
ATOM   2324  O   SER A 445      56.460 -22.910  76.750  1.00  0.00           O
ATOM   2325  N   ILE A 446      55.080 -24.390  77.860  1.00  0.00           N
ATOM   2326  H   ILE A 446      54.140 -24.750  77.920  1.00  0.00           H
ATOM   2327  CA  ILE A 446      56.180 -25.060  78.610  1.00  0.00           C
ATOM   2328  HA  ILE A 446      57.090 -24.650  78.170  1.00  0.00           H
ATOM   2329  CB  ILE A 446      56.150 -24.860  80.170  1.00  0.00           C
ATOM   2330  HB  ILE A 446      55.270 -25.410  80.530  1.00  0.00           H
ATOM   2331  CG2 ILE A 446      57.330 -25.580  80.820  1.00  0.00           C
ATOM   2332 1HG2 ILE A 446      57.190 -26.650  80.890  1.00  0.00           H
ATOM   2333 2HG2 ILE A 446      58.280 -25.260  80.380  1.00  0.00           H
ATOM   2334 3HG2 ILE A 446      57.340 -25.170  81.830  1.00  0.00           H
ATOM   2335  CG1 ILE A 446      56.110 -23.360  80.550  1.00  0.00           C
ATOM   2336 1HG1 ILE A 446      55.960 -23.270  81.630  1.00  0.00           H
ATOM   2337 2HG1 ILE A 446      55.230 -22.920  80.090  1.00  0.00           H
ATOM   2338  CD  ILE A 446      57.260 -22.530  80.070  1.00  0.00           C
ATOM   2339  HD1 ILE A 446      57.350 -22.720  79.000  1.00  0.00           H
ATOM   2340  HD2 ILE A 446      57.150 -21.480  80.330  1.00  0.00           H
ATOM   2341  HD3 ILE A 446      58.170 -22.920  80.520  1.00  0.00           H
ATOM   2342  C   ILE A 446      56.350 -26.500  78.270  1.00  0.00           C
ATOM   2343  O   ILE A 446      55.370 -27.240  78.320  1.00  0.00           O
ATOM   2344  N   LEU A 447      57.590 -26.910  77.920  1.00  0.00           N
ATOM   2345  H   LEU A 447      58.310 -26.200  77.890  1.00  0.00           H
ATOM   2346  CA  LEU A 447      57.860 -28.250  77.330  1.00  0.00           C
ATOM   2347  HA  LEU A 447      56.870 -28.700  77.330  1.00  0.00           H
ATOM   2348  CB  LEU A 447      58.410 -28.160  75.860  1.00  0.00           C
ATOM   2349  HB1 LEU A 447      58.580 -29.170  75.500  1.00  0.00           H
ATOM   2350  HB2 LEU A 447      59.380 -27.680  75.980  1.00  0.00           H
ATOM   2351  CG  LEU A 447      57.520 -27.360  74.880  1.00  0.00           C
ATOM   2352  HG  LEU A 447      57.260 -26.350  75.170  1.00  0.00           H
ATOM   2353  CD1 LEU A 447      58.100 -27.440  73.420  1.00  0.00           C
ATOM   2354 1HD1 LEU A 447      57.460 -26.860  72.750  1.00  0.00           H
ATOM   2355 2HD1 LEU A 447      59.070 -26.940  73.310  1.00  0.00           H
ATOM   2356 3HD1 LEU A 447      58.020 -28.470  73.090  1.00  0.00           H
ATOM   2357  CD2 LEU A 447      56.100 -27.920  74.700  1.00  0.00           C
ATOM   2358 1HD2 LEU A 447      55.720 -27.730  73.690  1.00  0.00           H
ATOM   2359 2HD2 LEU A 447      56.190 -29.000  74.750  1.00  0.00           H
ATOM   2360 3HD2 LEU A 447      55.560 -27.430  75.510  1.00  0.00           H
ATOM   2361  C   LEU A 447      58.830 -29.050  78.220  1.00  0.00           C
ATOM   2362  O   LEU A 447      59.510 -28.580  79.180  1.00  0.00           O
ATOM   2363  N   LEU A 448      58.810 -30.400  77.980  1.00  0.00           N
ATOM   2364  H   LEU A 448      58.200 -30.770  77.280  1.00  0.00           H
ATOM   2365  CA  LEU A 448      59.520 -31.450  78.740  1.00  0.00           C
ATOM   2366  HA  LEU A 448      60.170 -30.970  79.480  1.00  0.00           H
ATOM   2367  CB  LEU A 448      58.480 -32.360  79.420  1.00  0.00           C
ATOM   2368  HB1 LEU A 448      59.040 -33.130  79.950  1.00  0.00           H
ATOM   2369  HB2 LEU A 448      57.950 -32.850  78.610  1.00  0.00           H
ATOM   2370  CG  LEU A 448      57.350 -31.640  80.230  1.00  0.00           C
ATOM   2371  HG  LEU A 448      56.790 -31.020  79.530  1.00  0.00           H
ATOM   2372  CD1 LEU A 448      56.320 -32.700  80.750  1.00  0.00           C
ATOM   2373 1HD1 LEU A 448      55.770 -33.180  79.950  1.00  0.00           H
ATOM   2374 2HD1 LEU A 448      56.840 -33.330  81.470  1.00  0.00           H
ATOM   2375 3HD1 LEU A 448      55.570 -32.190  81.360  1.00  0.00           H
ATOM   2376  CD2 LEU A 448      57.790 -30.750  81.350  1.00  0.00           C
ATOM   2377 1HD2 LEU A 448      57.080 -30.620  82.170  1.00  0.00           H
ATOM   2378 2HD2 LEU A 448      58.710 -31.200  81.740  1.00  0.00           H
ATOM   2379 3HD2 LEU A 448      57.940 -29.750  80.960  1.00  0.00           H
ATOM   2380  C   LEU A 448      60.430 -32.280  77.840  1.00  0.00           C
ATOM   2381  O   LEU A 448      60.000 -32.860  76.790  1.00  0.00           O
ATOM   2382  N   THR A 449      61.710 -32.420  78.260  1.00  0.00           N
ATOM   2383  H   THR A 449      61.980 -31.960  79.110  1.00  0.00           H
ATOM   2384  CA  THR A 449      62.700 -33.290  77.660  1.00  0.00           C
ATOM   2385  HA  THR A 449      62.650 -33.150  76.590  1.00  0.00           H
ATOM   2386  CB  THR A 449      64.150 -32.990  78.070  1.00  0.00           C
ATOM   2387  HB  THR A 449      64.780 -33.660  77.490  1.00  0.00           H
ATOM   2388  CG2 THR A 449      64.490 -31.510  77.860  1.00  0.00           C
ATOM   2389 1HG2 THR A 449      64.320 -31.130  76.850  1.00  0.00           H
ATOM   2390 2HG2 THR A 449      64.110 -30.970  78.720  1.00  0.00           H
ATOM   2391 3HG2 THR A 449      65.570 -31.430  78.000  1.00  0.00           H
ATOM   2392  OG1 THR A 449      64.280 -33.370  79.400  1.00  0.00           O
ATOM   2393  HG1 THR A 449      65.070 -33.910  79.480  1.00  0.00           H
ATOM   2394  C   THR A 449      62.280 -34.770  77.880  1.00  0.00           C
ATOM   2395  O   THR A 449      61.620 -35.080  78.850  1.00  0.00           O
ATOM   2396  N   HIS A 450      62.870 -35.670  77.030  1.00  0.00           N
ATOM   2397  H   HIS A 450      63.280 -35.420  76.140  1.00  0.00           H
ATOM   2398  CA  HIS A 450      62.940 -37.140  77.260  1.00  0.00           C
ATOM   2399  HA  HIS A 450      61.970 -37.550  76.980  1.00  0.00           H
ATOM   2400  CB  HIS A 450      64.030 -37.720  76.310  1.00  0.00           C
ATOM   2401  HB1 HIS A 450      63.910 -37.220  75.350  1.00  0.00           H
ATOM   2402  HB2 HIS A 450      63.850 -38.790  76.220  1.00  0.00           H
ATOM   2403  CG  HIS A 450      65.490 -37.590  76.670  1.00  0.00           C
ATOM   2404  ND1 HIS A 450      66.190 -38.560  77.330  1.00  0.00           N
ATOM   2405  CE1 HIS A 450      67.310 -37.950  77.660  1.00  0.00           C
ATOM   2406  HE1 HIS A 450      68.090 -38.460  78.210  1.00  0.00           H
ATOM   2407  NE2 HIS A 450      67.430 -36.680  77.140  1.00  0.00           N
ATOM   2408  HE2 HIS A 450      68.230 -36.070  77.270  1.00  0.00           H
ATOM   2409  CD2 HIS A 450      66.200 -36.460  76.560  1.00  0.00           C
ATOM   2410  HD2 HIS A 450      65.870 -35.560  76.070  1.00  0.00           H
ATOM   2411  C   HIS A 450      63.190 -37.560  78.740  1.00  0.00           C
ATOM   2412  O   HIS A 450      62.350 -38.260  79.340  1.00  0.00           O
ATOM   2413  N   ASP A 451      64.130 -36.870  79.480  1.00  0.00           N
ATOM   2414  H   ASP A 451      64.760 -36.270  78.980  1.00  0.00           H
ATOM   2415  CA  ASP A 451      64.450 -37.070  80.940  1.00  0.00           C
ATOM   2416  HA  ASP A 451      64.000 -38.040  81.140  1.00  0.00           H
ATOM   2417  CB  ASP A 451      65.990 -37.080  81.190  1.00  0.00           C
ATOM   2418  HB1 ASP A 451      66.330 -37.770  80.420  1.00  0.00           H
ATOM   2419  HB2 ASP A 451      66.230 -37.470  82.170  1.00  0.00           H
ATOM   2420  CG  ASP A 451      66.640 -35.740  80.890  1.00  0.00           C
ATOM   2421  OD1 ASP A 451      66.200 -35.030  79.940  1.00  0.00           O
ATOM   2422  OD2 ASP A 451      67.510 -35.390  81.650  1.00  0.00           O
ATOM   2423  C   ASP A 451      63.770 -36.040  81.910  1.00  0.00           C
ATOM   2424  O   ASP A 451      64.180 -35.980  83.070  1.00  0.00           O
ATOM   2425  N   GLY A 452      62.740 -35.320  81.440  1.00  0.00           N
ATOM   2426  H   GLY A 452      62.580 -35.420  80.450  1.00  0.00           H
ATOM   2427  CA  GLY A 452      61.940 -34.530  82.250  1.00  0.00           C
ATOM   2428  HA1 GLY A 452      61.680 -35.080  83.160  1.00  0.00           H
ATOM   2429  HA2 GLY A 452      61.000 -34.180  81.830  1.00  0.00           H
ATOM   2430  C   GLY A 452      62.540 -33.210  82.770  1.00  0.00           C
ATOM   2431  O   GLY A 452      61.930 -32.550  83.650  1.00  0.00           O
ATOM   2432  N   ARG A 453      63.590 -32.630  82.130  1.00  0.00           N
ATOM   2433  H   ARG A 453      63.920 -33.140  81.320  1.00  0.00           H
ATOM   2434  CA  ARG A 453      64.000 -31.220  82.280  1.00  0.00           C
ATOM   2435  HA  ARG A 453      64.070 -31.070  83.360  1.00  0.00           H
ATOM   2436  CB  ARG A 453      65.420 -31.050  81.750  1.00  0.00           C
ATOM   2437  HB1 ARG A 453      65.730 -30.010  81.660  1.00  0.00           H
ATOM   2438  HB2 ARG A 453      65.360 -31.430  80.730  1.00  0.00           H
ATOM   2439  CG  ARG A 453      66.410 -31.780  82.690  1.00  0.00           C
ATOM   2440  HG1 ARG A 453      66.040 -32.780  82.930  1.00  0.00           H
ATOM   2441  HG2 ARG A 453      66.430 -31.330  83.680  1.00  0.00           H
ATOM   2442  CD  ARG A 453      67.800 -31.910  82.160  1.00  0.00           C
ATOM   2443  HD1 ARG A 453      68.380 -32.480  82.890  1.00  0.00           H
ATOM   2444  HD2 ARG A 453      68.210 -30.920  81.990  1.00  0.00           H
ATOM   2445  NE  ARG A 453      67.720 -32.610  80.840  1.00  0.00           N
ATOM   2446  HE  ARG A 453      67.700 -33.620  80.850  1.00  0.00           H
ATOM   2447  CZ  ARG A 453      67.820 -32.100  79.640  1.00  0.00           C
ATOM   2448  NH1 ARG A 453      68.150 -30.820  79.380  1.00  0.00           N
ATOM   2449 1HH1 ARG A 453      68.170 -30.190  80.170  1.00  0.00           H
ATOM   2450 2HH1 ARG A 453      68.340 -30.530  78.430  1.00  0.00           H
ATOM   2451  NH2 ARG A 453      67.750 -32.910  78.640  1.00  0.00           N
ATOM   2452 1HH2 ARG A 453      67.410 -33.830  78.870  1.00  0.00           H
ATOM   2453 2HH2 ARG A 453      67.770 -32.570  77.690  1.00  0.00           H
ATOM   2454  C   ARG A 453      62.910 -30.350  81.620  1.00  0.00           C
ATOM   2455  O   ARG A 453      62.150 -30.880  80.840  1.00  0.00           O
ATOM   2456  N   VAL A 454      62.950 -29.040  81.950  1.00  0.00           N
ATOM   2457  H   VAL A 454      63.680 -28.760  82.590  1.00  0.00           H
ATOM   2458  CA  VAL A 454      61.990 -27.990  81.400  1.00  0.00           C
ATOM   2459  HA  VAL A 454      61.130 -28.410  80.880  1.00  0.00           H
ATOM   2460  CB  VAL A 454      61.390 -27.330  82.610  1.00  0.00           C
ATOM   2461  HB  VAL A 454      62.120 -27.360  83.430  1.00  0.00           H
ATOM   2462  CG1 VAL A 454      60.590 -26.000  82.370  1.00  0.00           C
ATOM   2463 1HG1 VAL A 454      61.220 -25.170  82.070  1.00  0.00           H
ATOM   2464 2HG1 VAL A 454      59.950 -26.130  81.500  1.00  0.00           H
ATOM   2465 3HG1 VAL A 454      59.980 -25.760  83.240  1.00  0.00           H
ATOM   2466  CG2 VAL A 454      60.220 -28.270  83.140  1.00  0.00           C
ATOM   2467 1HG2 VAL A 454      59.900 -27.930  84.130  1.00  0.00           H
ATOM   2468 2HG2 VAL A 454      59.430 -28.320  82.390  1.00  0.00           H
ATOM   2469 3HG2 VAL A 454      60.650 -29.270  83.160  1.00  0.00           H
ATOM   2470  C   VAL A 454      62.580 -26.900  80.520  1.00  0.00           C
ATOM   2471  O   VAL A 454      63.650 -26.380  80.720  1.00  0.00           O
ATOM   2472  N   LYS A 455      61.960 -26.640  79.400  1.00  0.00           N
ATOM   2473  H   LYS A 455      61.120 -27.170  79.220  1.00  0.00           H
ATOM   2474  CA  LYS A 455      62.380 -25.600  78.360  1.00  0.00           C
ATOM   2475  HA  LYS A 455      63.010 -24.840  78.820  1.00  0.00           H
ATOM   2476  CB  LYS A 455      63.080 -26.250  77.140  1.00  0.00           C
ATOM   2477  HB1 LYS A 455      63.130 -25.590  76.270  1.00  0.00           H
ATOM   2478  HB2 LYS A 455      62.480 -27.110  76.830  1.00  0.00           H
ATOM   2479  CG  LYS A 455      64.570 -26.610  77.320  1.00  0.00           C
ATOM   2480  HG1 LYS A 455      64.700 -27.320  78.140  1.00  0.00           H
ATOM   2481  HG2 LYS A 455      65.050 -25.690  77.670  1.00  0.00           H
ATOM   2482  CD  LYS A 455      65.300 -27.060  76.070  1.00  0.00           C
ATOM   2483  HD1 LYS A 455      64.850 -26.640  75.170  1.00  0.00           H
ATOM   2484  HD2 LYS A 455      65.290 -28.150  76.030  1.00  0.00           H
ATOM   2485  CE  LYS A 455      66.810 -26.700  76.250  1.00  0.00           C
ATOM   2486  HE1 LYS A 455      67.290 -27.170  77.110  1.00  0.00           H
ATOM   2487  HE2 LYS A 455      66.770 -25.650  76.550  1.00  0.00           H
ATOM   2488  NZ  LYS A 455      67.540 -26.670  74.950  1.00  0.00           N
ATOM   2489  HZ1 LYS A 455      67.040 -26.400  74.120  1.00  0.00           H
ATOM   2490  HZ2 LYS A 455      68.340 -26.060  75.090  1.00  0.00           H
ATOM   2491  HZ3 LYS A 455      67.860 -27.590  74.680  1.00  0.00           H
ATOM   2492  C   LYS A 455      61.140 -24.780  77.880  1.00  0.00           C
ATOM   2493  O   LYS A 455      60.000 -25.270  77.710  1.00  0.00           O
ATOM   2494  N   LEU A 456      61.410 -23.480  77.730  1.00  0.00           N
ATOM   2495  H   LEU A 456      62.370 -23.170  77.750  1.00  0.00           H
ATOM   2496  CA  LEU A 456      60.530 -22.430  77.270  1.00  0.00           C
ATOM   2497  HA  LEU A 456      59.570 -22.700  77.710  1.00  0.00           H
ATOM   2498  CB  LEU A 456      60.930 -21.150  78.080  1.00  0.00           C
ATOM   2499  HB1 LEU A 456      62.010 -21.170  77.950  1.00  0.00           H
ATOM   2500  HB2 LEU A 456      60.750 -21.440  79.110  1.00  0.00           H
ATOM   2501  CG  LEU A 456      60.440 -19.750  77.800  1.00  0.00           C
ATOM   2502  HG  LEU A 456      60.650 -19.590  76.740  1.00  0.00           H
ATOM   2503  CD1 LEU A 456      58.910 -19.610  78.010  1.00  0.00           C
ATOM   2504 1HD1 LEU A 456      58.560 -18.680  77.550  1.00  0.00           H
ATOM   2505 2HD1 LEU A 456      58.340 -20.360  77.460  1.00  0.00           H
ATOM   2506 3HD1 LEU A 456      58.640 -19.750  79.050  1.00  0.00           H
ATOM   2507  CD2 LEU A 456      61.070 -18.750  78.750  1.00  0.00           C
ATOM   2508 1HD2 LEU A 456      62.130 -19.000  78.710  1.00  0.00           H
ATOM   2509 2HD2 LEU A 456      60.760 -17.730  78.510  1.00  0.00           H
ATOM   2510 3HD2 LEU A 456      60.730 -18.970  79.760  1.00  0.00           H
ATOM   2511  C   LEU A 456      60.450 -22.310  75.730  1.00  0.00           C
ATOM   2512  O   LEU A 456      61.490 -22.560  75.120  1.00  0.00           O
ATOM   2513  N   SER A 457      59.280 -21.980  75.190  1.00  0.00           N
ATOM   2514  H   SER A 457      58.570 -21.720  75.860  1.00  0.00           H
ATOM   2515  CA  SER A 457      58.870 -22.100  73.800  1.00  0.00           C
ATOM   2516  HA  SER A 457      59.750 -21.960  73.170  1.00  0.00           H
ATOM   2517  CB  SER A 457      58.360 -23.520  73.500  1.00  0.00           C
ATOM   2518  HB1 SER A 457      57.400 -23.630  74.000  1.00  0.00           H
ATOM   2519  HB2 SER A 457      59.040 -24.290  73.870  1.00  0.00           H
ATOM   2520  OG  SER A 457      58.130 -23.740  72.090  1.00  0.00           O
ATOM   2521  HG  SER A 457      57.450 -24.370  71.890  1.00  0.00           H
ATOM   2522  C   SER A 457      57.720 -21.060  73.490  1.00  0.00           C
ATOM   2523  O   SER A 457      57.270 -20.310  74.330  1.00  0.00           O
ATOM   2524  N   ASP A 458      57.180 -21.030  72.310  1.00  0.00           N
ATOM   2525  H   ASP A 458      57.650 -21.550  71.580  1.00  0.00           H
ATOM   2526  CA  ASP A 458      56.060 -20.160  71.980  1.00  0.00           C
ATOM   2527  HA  ASP A 458      55.900 -20.350  70.920  1.00  0.00           H
ATOM   2528  CB  ASP A 458      54.690 -20.520  72.520  1.00  0.00           C
ATOM   2529  HB1 ASP A 458      54.000 -19.900  71.940  1.00  0.00           H
ATOM   2530  HB2 ASP A 458      54.690 -20.110  73.530  1.00  0.00           H
ATOM   2531  CG  ASP A 458      54.260 -21.960  72.310  1.00  0.00           C
ATOM   2532  OD1 ASP A 458      53.360 -22.420  72.980  1.00  0.00           O
ATOM   2533  OD2 ASP A 458      54.780 -22.640  71.370  1.00  0.00           O
ATOM   2534  C   ASP A 458      56.370 -18.690  71.890  1.00  0.00           C
ATOM   2535  O   ASP A 458      55.580 -17.790  72.140  1.00  0.00           O
ATOM   2536  N   PHE A 459      57.600 -18.360  71.450  1.00  0.00           N
ATOM   2537  H   PHE A 459      58.120 -19.080  70.970  1.00  0.00           H
ATOM   2538  CA  PHE A 459      58.140 -16.970  71.210  1.00  0.00           C
ATOM   2539  HA  PHE A 459      57.950 -16.340  72.080  1.00  0.00           H
ATOM   2540  CB  PHE A 459      59.730 -17.020  71.160  1.00  0.00           C
ATOM   2541  HB1 PHE A 459      60.120 -16.040  70.900  1.00  0.00           H
ATOM   2542  HB2 PHE A 459      60.010 -17.810  70.480  1.00  0.00           H
ATOM   2543  CG  PHE A 459      60.400 -17.440  72.500  1.00  0.00           C
ATOM   2544  CD1 PHE A 459      60.570 -18.830  72.850  1.00  0.00           C
ATOM   2545  HD1 PHE A 459      60.200 -19.590  72.180  1.00  0.00           H
ATOM   2546  CE1 PHE A 459      61.190 -19.140  74.040  1.00  0.00           C
ATOM   2547  HE1 PHE A 459      61.180 -20.170  74.350  1.00  0.00           H
ATOM   2548  CZ  PHE A 459      61.760 -18.120  74.880  1.00  0.00           C
ATOM   2549  HZ  PHE A 459      62.320 -18.380  75.760  1.00  0.00           H
ATOM   2550  CE2 PHE A 459      61.550 -16.800  74.490  1.00  0.00           C
ATOM   2551  HE2 PHE A 459      61.900 -15.990  75.120  1.00  0.00           H
ATOM   2552  CD2 PHE A 459      60.860 -16.440  73.340  1.00  0.00           C
ATOM   2553  HD2 PHE A 459      60.740 -15.400  73.070  1.00  0.00           H
ATOM   2554  C   PHE A 459      57.580 -16.290  69.980  1.00  0.00           C
ATOM   2555  O   PHE A 459      58.210 -15.330  69.420  1.00  0.00           O
ATOM   2556  N   GLY A 460      56.420 -16.650  69.490  1.00  0.00           N
ATOM   2557  H   GLY A 460      55.880 -17.310  70.030  1.00  0.00           H
ATOM   2558  CA  GLY A 460      55.890 -16.170  68.200  1.00  0.00           C
ATOM   2559  HA1 GLY A 460      54.940 -16.650  67.940  1.00  0.00           H
ATOM   2560  HA2 GLY A 460      56.500 -16.440  67.340  1.00  0.00           H
ATOM   2561  C   GLY A 460      55.790 -14.670  68.110  1.00  0.00           C
ATOM   2562  O   GLY A 460      55.780 -14.100  67.040  1.00  0.00           O
ATOM   2563  N   PHE A 461      55.620 -13.890  69.200  1.00  0.00           N
ATOM   2564  H   PHE A 461      55.590 -14.370  70.100  1.00  0.00           H
ATOM   2565  CA  PHE A 461      55.500 -12.450  69.250  1.00  0.00           C
ATOM   2566  HA  PHE A 461      55.390 -12.080  68.230  1.00  0.00           H
ATOM   2567  CB  PHE A 461      54.250 -12.020  69.940  1.00  0.00           C
ATOM   2568  HB1 PHE A 461      54.220 -10.940  69.810  1.00  0.00           H
ATOM   2569  HB2 PHE A 461      54.300 -12.250  71.010  1.00  0.00           H
ATOM   2570  CG  PHE A 461      52.900 -12.670  69.500  1.00  0.00           C
ATOM   2571  CD1 PHE A 461      52.000 -13.280  70.390  1.00  0.00           C
ATOM   2572  HD1 PHE A 461      52.180 -13.150  71.450  1.00  0.00           H
ATOM   2573  CE1 PHE A 461      50.830 -13.900  69.880  1.00  0.00           C
ATOM   2574  HE1 PHE A 461      50.040 -14.280  70.510  1.00  0.00           H
ATOM   2575  CZ  PHE A 461      50.700 -13.950  68.470  1.00  0.00           C
ATOM   2576  HZ  PHE A 461      49.910 -14.510  67.990  1.00  0.00           H
ATOM   2577  CE2 PHE A 461      51.480 -13.250  67.570  1.00  0.00           C
ATOM   2578  HE2 PHE A 461      51.270 -13.350  66.520  1.00  0.00           H
ATOM   2579  CD2 PHE A 461      52.660 -12.680  68.080  1.00  0.00           C
ATOM   2580  HD2 PHE A 461      53.380 -12.290  67.380  1.00  0.00           H
ATOM   2581  C   PHE A 461      56.700 -11.620  69.770  1.00  0.00           C
ATOM   2582  O   PHE A 461      56.610 -10.420  70.020  1.00  0.00           O
ATOM   2583  N   CYS A 462      57.820 -12.340  70.010  1.00  0.00           N
ATOM   2584  H   CYS A 462      57.840 -13.290  69.670  1.00  0.00           H
ATOM   2585  CA  CYS A 462      59.040 -11.850  70.730  1.00  0.00           C
ATOM   2586  HA  CYS A 462      58.650 -11.440  71.660  1.00  0.00           H
ATOM   2587  CB  CYS A 462      59.930 -13.080  70.980  1.00  0.00           C
ATOM   2588  HB1 CYS A 462      59.320 -13.950  71.240  1.00  0.00           H
ATOM   2589  HB2 CYS A 462      60.650 -12.790  71.740  1.00  0.00           H
ATOM   2590  SG  CYS A 462      60.790 -13.710  69.460  1.00  0.00           S
ATOM   2591  HG  CYS A 462      59.880 -14.580  69.020  1.00  0.00           H
ATOM   2592  C   CYS A 462      59.700 -10.580  70.150  1.00  0.00           C
ATOM   2593  O   CYS A 462      59.700 -10.390  68.940  1.00  0.00           O
ATOM   2594  N   ALA A 463      60.090  -9.680  71.060  1.00  0.00           N
ATOM   2595  H   ALA A 463      60.150 -10.090  71.980  1.00  0.00           H
ATOM   2596  CA  ALA A 463      60.560  -8.310  70.790  1.00  0.00           C
ATOM   2597  HA  ALA A 463      61.160  -8.350  69.880  1.00  0.00           H
ATOM   2598  CB  ALA A 463      59.250  -7.510  70.520  1.00  0.00           C
ATOM   2599  HB1 ALA A 463      58.480  -7.670  71.270  1.00  0.00           H
ATOM   2600  HB2 ALA A 463      59.570  -6.470  70.460  1.00  0.00           H
ATOM   2601  HB3 ALA A 463      58.820  -7.800  69.570  1.00  0.00           H
ATOM   2602  C   ALA A 463      61.410  -7.730  71.950  1.00  0.00           C
ATOM   2603  O   ALA A 463      61.100  -8.130  73.130  1.00  0.00           O
ATOM   2604  N   GLN A 464      62.390  -6.870  71.730  1.00  0.00           N
ATOM   2605  H   GLN A 464      62.540  -6.710  70.750  1.00  0.00           H
ATOM   2606  CA  GLN A 464      63.270  -6.240  72.740  1.00  0.00           C
ATOM   2607  HA  GLN A 464      63.120  -6.820  73.650  1.00  0.00           H
ATOM   2608  CB  GLN A 464      64.760  -6.200  72.140  1.00  0.00           C
ATOM   2609  HB1 GLN A 464      64.830  -5.500  71.310  1.00  0.00           H
ATOM   2610  HB2 GLN A 464      64.950  -7.200  71.730  1.00  0.00           H
ATOM   2611  CG  GLN A 464      65.870  -5.830  73.120  1.00  0.00           C
ATOM   2612  HG1 GLN A 464      65.760  -6.430  74.020  1.00  0.00           H
ATOM   2613  HG2 GLN A 464      65.610  -4.820  73.430  1.00  0.00           H
ATOM   2614  CD  GLN A 464      67.300  -5.840  72.580  1.00  0.00           C
ATOM   2615  OE1 GLN A 464      67.650  -5.670  71.460  1.00  0.00           O
ATOM   2616  NE2 GLN A 464      68.240  -6.140  73.530  1.00  0.00           N
ATOM   2617 1HE2 GLN A 464      67.980  -6.330  74.490  1.00  0.00           H
ATOM   2618 2HE2 GLN A 464      69.180  -6.300  73.210  1.00  0.00           H
ATOM   2619  C   GLN A 464      62.900  -4.870  73.280  1.00  0.00           C
ATOM   2620  O   GLN A 464      62.660  -3.920  72.520  1.00  0.00           O
ATOM   2621  N   VAL A 465      63.030  -4.640  74.620  1.00  0.00           N
ATOM   2622  H   VAL A 465      63.260  -5.480  75.150  1.00  0.00           H
ATOM   2623  CA  VAL A 465      63.220  -3.340  75.290  1.00  0.00           C
ATOM   2624  HA  VAL A 465      62.750  -2.620  74.620  1.00  0.00           H
ATOM   2625  CB  VAL A 465      62.390  -3.120  76.640  1.00  0.00           C
ATOM   2626  HB  VAL A 465      62.820  -2.280  77.180  1.00  0.00           H
ATOM   2627  CG1 VAL A 465      60.920  -2.930  76.250  1.00  0.00           C
ATOM   2628 1HG1 VAL A 465      60.890  -2.100  75.550  1.00  0.00           H
ATOM   2629 2HG1 VAL A 465      60.470  -3.790  75.770  1.00  0.00           H
ATOM   2630 3HG1 VAL A 465      60.300  -2.690  77.120  1.00  0.00           H
ATOM   2631  CG2 VAL A 465      62.480  -4.260  77.660  1.00  0.00           C
ATOM   2632 1HG2 VAL A 465      62.000  -3.940  78.580  1.00  0.00           H
ATOM   2633 2HG2 VAL A 465      62.100  -5.140  77.140  1.00  0.00           H
ATOM   2634 3HG2 VAL A 465      63.500  -4.510  77.940  1.00  0.00           H
ATOM   2635  C   VAL A 465      64.610  -3.040  75.480  1.00  0.00           C
ATOM   2636  O   VAL A 465      65.390  -3.900  75.920  1.00  0.00           O
ATOM   2637  N   SER A 466      64.970  -1.780  75.210  1.00  0.00           N
ATOM   2638  H   SER A 466      64.250  -1.190  74.820  1.00  0.00           H
ATOM   2639  CA  SER A 466      66.440  -1.310  75.180  1.00  0.00           C
ATOM   2640  HA  SER A 466      66.830  -1.850  76.050  1.00  0.00           H
ATOM   2641  CB  SER A 466      67.070  -1.710  73.920  1.00  0.00           C
ATOM   2642  HB1 SER A 466      66.720  -2.690  73.600  1.00  0.00           H
ATOM   2643  HB2 SER A 466      68.160  -1.690  73.890  1.00  0.00           H
ATOM   2644  OG  SER A 466      66.640  -0.820  72.950  1.00  0.00           O
ATOM   2645  HG  SER A 466      66.920  -1.050  72.070  1.00  0.00           H
ATOM   2646  C   SER A 466      66.510   0.230  75.410  1.00  0.00           C
ATOM   2647  O   SER A 466      65.500   0.920  75.680  1.00  0.00           O
ATOM   2648  N   LYS A 467      67.780   0.710  75.300  1.00  0.00           N
ATOM   2649  H   LYS A 467      68.450   0.030  74.960  1.00  0.00           H
ATOM   2650  CA  LYS A 467      68.110   2.140  75.310  1.00  0.00           C
ATOM   2651  HA  LYS A 467      67.620   2.510  76.210  1.00  0.00           H
ATOM   2652  CB  LYS A 467      69.620   2.370  75.430  1.00  0.00           C
ATOM   2653  HB1 LYS A 467      69.820   3.380  75.070  1.00  0.00           H
ATOM   2654  HB2 LYS A 467      70.150   1.740  74.710  1.00  0.00           H
ATOM   2655  CG  LYS A 467      70.270   2.160  76.780  1.00  0.00           C
ATOM   2656  HG1 LYS A 467      69.960   1.150  77.080  1.00  0.00           H
ATOM   2657  HG2 LYS A 467      69.990   2.940  77.490  1.00  0.00           H
ATOM   2658  CD  LYS A 467      71.830   2.250  76.680  1.00  0.00           C
ATOM   2659  HD1 LYS A 467      72.100   3.180  76.190  1.00  0.00           H
ATOM   2660  HD2 LYS A 467      72.330   1.440  76.140  1.00  0.00           H
ATOM   2661  CE  LYS A 467      72.270   2.120  78.120  1.00  0.00           C
ATOM   2662  HE1 LYS A 467      72.230   1.080  78.440  1.00  0.00           H
ATOM   2663  HE2 LYS A 467      71.710   2.730  78.830  1.00  0.00           H
ATOM   2664  NZ  LYS A 467      73.710   2.540  78.270  1.00  0.00           N
ATOM   2665  HZ1 LYS A 467      74.380   1.820  78.030  1.00  0.00           H
ATOM   2666  HZ2 LYS A 467      73.750   3.350  77.670  1.00  0.00           H
ATOM   2667  HZ3 LYS A 467      73.960   2.820  79.210  1.00  0.00           H
ATOM   2668  C   LYS A 467      67.390   2.960  74.240  1.00  0.00           C
ATOM   2669  O   LYS A 467      67.180   4.150  74.600  1.00  0.00           O
ATOM   2670  N   GLU A 468      67.010   2.450  73.070  1.00  0.00           N
ATOM   2671  H   GLU A 468      67.140   1.460  72.880  1.00  0.00           H
ATOM   2672  CA  GLU A 468      66.160   3.210  72.100  1.00  0.00           C
ATOM   2673  HA  GLU A 468      66.430   4.260  72.210  1.00  0.00           H
ATOM   2674  CB  GLU A 468      66.450   2.810  70.680  1.00  0.00           C
ATOM   2675  HB1 GLU A 468      65.870   3.440  70.010  1.00  0.00           H
ATOM   2676  HB2 GLU A 468      66.210   1.750  70.610  1.00  0.00           H
ATOM   2677  CG  GLU A 468      67.950   3.040  70.360  1.00  0.00           C
ATOM   2678  HG1 GLU A 468      68.630   2.440  70.970  1.00  0.00           H
ATOM   2679  HG2 GLU A 468      68.170   4.070  70.630  1.00  0.00           H
ATOM   2680  CD  GLU A 468      68.280   2.750  68.830  1.00  0.00           C
ATOM   2681  OE1 GLU A 468      68.490   1.670  68.330  1.00  0.00           O
ATOM   2682  OE2 GLU A 468      68.380   3.760  68.040  1.00  0.00           O
ATOM   2683  C   GLU A 468      64.710   2.990  72.260  1.00  0.00           C
ATOM   2684  O   GLU A 468      63.920   3.740  71.730  1.00  0.00           O
ATOM   2685  N   VAL A 469      64.280   1.950  73.050  1.00  0.00           N
ATOM   2686  H   VAL A 469      65.030   1.440  73.490  1.00  0.00           H
ATOM   2687  CA  VAL A 469      62.910   1.540  73.330  1.00  0.00           C
ATOM   2688  HA  VAL A 469      62.200   2.350  73.140  1.00  0.00           H
ATOM   2689  CB  VAL A 469      62.470   0.340  72.450  1.00  0.00           C
ATOM   2690  HB  VAL A 469      62.970  -0.600  72.690  1.00  0.00           H
ATOM   2691  CG1 VAL A 469      60.940   0.110  72.650  1.00  0.00           C
ATOM   2692 1HG1 VAL A 469      60.470   1.070  72.440  1.00  0.00           H
ATOM   2693 2HG1 VAL A 469      60.580  -0.560  71.870  1.00  0.00           H
ATOM   2694 3HG1 VAL A 469      60.660  -0.430  73.560  1.00  0.00           H
ATOM   2695  CG2 VAL A 469      62.880   0.560  70.990  1.00  0.00           C
ATOM   2696 1HG2 VAL A 469      62.660   1.600  70.750  1.00  0.00           H
ATOM   2697 2HG2 VAL A 469      63.940   0.290  70.940  1.00  0.00           H
ATOM   2698 3HG2 VAL A 469      62.310  -0.160  70.390  1.00  0.00           H
ATOM   2699  C   VAL A 469      62.640   1.290  74.850  1.00  0.00           C
ATOM   2700  O   VAL A 469      62.700   0.110  75.220  1.00  0.00           O
ATOM   2701  N   PRO A 470      62.390   2.300  75.750  1.00  0.00           N
ATOM   2702  CD  PRO A 470      62.560   3.730  75.540  1.00  0.00           C
ATOM   2703  HD1 PRO A 470      61.870   4.170  74.820  1.00  0.00           H
ATOM   2704  HD2 PRO A 470      63.550   4.020  75.180  1.00  0.00           H
ATOM   2705  CG  PRO A 470      62.350   4.340  76.940  1.00  0.00           C
ATOM   2706  HG1 PRO A 470      61.880   5.320  76.900  1.00  0.00           H
ATOM   2707  HG2 PRO A 470      63.330   4.500  77.400  1.00  0.00           H
ATOM   2708  CB  PRO A 470      61.590   3.340  77.830  1.00  0.00           C
ATOM   2709  HB1 PRO A 470      60.530   3.550  77.670  1.00  0.00           H
ATOM   2710  HB2 PRO A 470      61.850   3.420  78.880  1.00  0.00           H
ATOM   2711  CA  PRO A 470      61.990   1.970  77.180  1.00  0.00           C
ATOM   2712  HA  PRO A 470      62.800   1.550  77.780  1.00  0.00           H
ATOM   2713  C   PRO A 470      60.840   0.950  77.310  1.00  0.00           C
ATOM   2714  O   PRO A 470      60.950   0.120  78.170  1.00  0.00           O
ATOM   2715  N   ARG A 471      59.770   1.240  76.620  1.00  0.00           N
ATOM   2716  H   ARG A 471      59.740   2.010  75.960  1.00  0.00           H
ATOM   2717  CA  ARG A 471      58.530   0.400  76.740  1.00  0.00           C
ATOM   2718  HA  ARG A 471      58.870  -0.540  77.180  1.00  0.00           H
ATOM   2719  CB  ARG A 471      57.470   1.150  77.460  1.00  0.00           C
ATOM   2720  HB1 ARG A 471      56.670   0.420  77.550  1.00  0.00           H
ATOM   2721  HB2 ARG A 471      57.290   2.010  76.820  1.00  0.00           H
ATOM   2722  CG  ARG A 471      57.990   1.640  78.900  1.00  0.00           C
ATOM   2723  HG1 ARG A 471      57.190   2.320  79.200  1.00  0.00           H
ATOM   2724  HG2 ARG A 471      58.900   2.210  78.770  1.00  0.00           H
ATOM   2725  CD  ARG A 471      58.290   0.540  79.910  1.00  0.00           C
ATOM   2726  HD1 ARG A 471      59.110   0.890  80.540  1.00  0.00           H
ATOM   2727  HD2 ARG A 471      58.630  -0.300  79.300  1.00  0.00           H
ATOM   2728  NE  ARG A 471      57.170   0.260  80.840  1.00  0.00           N
ATOM   2729  HE  ARG A 471      56.410   0.930  80.800  1.00  0.00           H
ATOM   2730  CZ  ARG A 471      57.200  -0.590  81.840  1.00  0.00           C
ATOM   2731  NH1 ARG A 471      58.190  -1.390  82.000  1.00  0.00           N
ATOM   2732 1HH1 ARG A 471      58.940  -1.430  81.320  1.00  0.00           H
ATOM   2733 2HH1 ARG A 471      58.040  -2.180  82.610  1.00  0.00           H
ATOM   2734  NH2 ARG A 471      56.230  -0.690  82.590  1.00  0.00           N
ATOM   2735 1HH2 ARG A 471      55.570   0.070  82.500  1.00  0.00           H
ATOM   2736 2HH2 ARG A 471      56.270  -1.500  83.210  1.00  0.00           H
ATOM   2737  C   ARG A 471      58.070  -0.010  75.340  1.00  0.00           C
ATOM   2738  O   ARG A 471      58.190   0.680  74.390  1.00  0.00           O
ATOM   2739  N   ARG A 472      57.460  -1.190  75.230  1.00  0.00           N
ATOM   2740  H   ARG A 472      57.330  -1.780  76.040  1.00  0.00           H
ATOM   2741  CA  ARG A 472      56.600  -1.520  74.090  1.00  0.00           C
ATOM   2742  HA  ARG A 472      56.690  -0.700  73.380  1.00  0.00           H
ATOM   2743  CB  ARG A 472      56.980  -2.850  73.410  1.00  0.00           C
ATOM   2744  HB1 ARG A 472      56.230  -3.060  72.650  1.00  0.00           H
ATOM   2745  HB2 ARG A 472      56.970  -3.570  74.230  1.00  0.00           H
ATOM   2746  CG  ARG A 472      58.350  -2.720  72.830  1.00  0.00           C
ATOM   2747  HG1 ARG A 472      59.130  -2.610  73.580  1.00  0.00           H
ATOM   2748  HG2 ARG A 472      58.300  -1.770  72.290  1.00  0.00           H
ATOM   2749  CD  ARG A 472      58.750  -3.850  71.880  1.00  0.00           C
ATOM   2750  HD1 ARG A 472      58.000  -4.070  71.120  1.00  0.00           H
ATOM   2751  HD2 ARG A 472      58.990  -4.740  72.460  1.00  0.00           H
ATOM   2752  NE  ARG A 472      60.120  -3.550  71.300  1.00  0.00           N
ATOM   2753  HE  ARG A 472      60.880  -3.570  71.970  1.00  0.00           H
ATOM   2754  CZ  ARG A 472      60.510  -3.200  70.100  1.00  0.00           C
ATOM   2755  NH1 ARG A 472      59.730  -3.010  69.090  1.00  0.00           N
ATOM   2756 1HH1 ARG A 472      58.740  -3.090  69.270  1.00  0.00           H
ATOM   2757 2HH1 ARG A 472      60.090  -2.830  68.160  1.00  0.00           H
ATOM   2758  NH2 ARG A 472      61.850  -2.990  69.920  1.00  0.00           N
ATOM   2759 1HH2 ARG A 472      62.490  -3.220  70.660  1.00  0.00           H
ATOM   2760 2HH2 ARG A 472      62.160  -2.770  68.980  1.00  0.00           H
ATOM   2761  C   ARG A 472      55.120  -1.400  74.450  1.00  0.00           C
ATOM   2762  O   ARG A 472      54.800  -1.150  75.640  1.00  0.00           O
ATOM   2763  N   LYS A 473      54.210  -1.610  73.500  1.00  0.00           N
ATOM   2764  H   LYS A 473      54.640  -1.840  72.610  1.00  0.00           H
ATOM   2765  CA  LYS A 473      52.850  -1.010  73.470  1.00  0.00           C
ATOM   2766  HA  LYS A 473      52.530  -0.940  74.510  1.00  0.00           H
ATOM   2767  CB  LYS A 473      52.940   0.460  72.990  1.00  0.00           C
ATOM   2768  HB1 LYS A 473      53.570   0.490  72.110  1.00  0.00           H
ATOM   2769  HB2 LYS A 473      53.430   1.000  73.800  1.00  0.00           H
ATOM   2770  CG  LYS A 473      51.700   1.310  72.680  1.00  0.00           C
ATOM   2771  HG1 LYS A 473      51.120   0.860  71.880  1.00  0.00           H
ATOM   2772  HG2 LYS A 473      52.000   2.330  72.450  1.00  0.00           H
ATOM   2773  CD  LYS A 473      50.830   1.400  73.920  1.00  0.00           C
ATOM   2774  HD1 LYS A 473      51.370   1.770  74.790  1.00  0.00           H
ATOM   2775  HD2 LYS A 473      50.580   0.380  74.200  1.00  0.00           H
ATOM   2776  CE  LYS A 473      49.610   2.280  73.740  1.00  0.00           C
ATOM   2777  HE1 LYS A 473      48.980   1.730  73.040  1.00  0.00           H
ATOM   2778  HE2 LYS A 473      49.880   3.250  73.320  1.00  0.00           H
ATOM   2779  NZ  LYS A 473      48.900   2.520  74.980  1.00  0.00           N
ATOM   2780  HZ1 LYS A 473      48.020   2.980  74.790  1.00  0.00           H
ATOM   2781  HZ2 LYS A 473      48.790   1.630  75.450  1.00  0.00           H
ATOM   2782  HZ3 LYS A 473      49.340   3.200  75.590  1.00  0.00           H
ATOM   2783  C   LYS A 473      51.860  -1.850  72.600  1.00  0.00           C
ATOM   2784  O   LYS A 473      50.690  -1.790  72.880  1.00  0.00           O
ATOM   2785  N   SER A 474      52.350  -2.640  71.670  1.00  0.00           N
ATOM   2786  H   SER A 474      53.310  -2.490  71.390  1.00  0.00           H
ATOM   2787  CA  SER A 474      51.400  -3.340  70.690  1.00  0.00           C
ATOM   2788  HA  SER A 474      50.810  -2.610  70.130  1.00  0.00           H
ATOM   2789  CB  SER A 474      52.150  -4.100  69.590  1.00  0.00           C
ATOM   2790  HB1 SER A 474      52.800  -3.450  69.010  1.00  0.00           H
ATOM   2791  HB2 SER A 474      51.350  -4.520  68.980  1.00  0.00           H
ATOM   2792  OG  SER A 474      52.900  -5.150  70.160  1.00  0.00           O
ATOM   2793  HG  SER A 474      53.750  -5.290  69.730  1.00  0.00           H
ATOM   2794  C   SER A 474      50.480  -4.290  71.530  1.00  0.00           C
ATOM   2795  O   SER A 474      50.770  -4.740  72.620  1.00  0.00           O
ATOM   2796  N   LEU A 475      49.280  -4.520  70.970  1.00  0.00           N
ATOM   2797  H   LEU A 475      49.120  -4.140  70.050  1.00  0.00           H
ATOM   2798  CA  LEU A 475      48.130  -5.150  71.530  1.00  0.00           C
ATOM   2799  HA  LEU A 475      48.000  -4.880  72.570  1.00  0.00           H
ATOM   2800  CB  LEU A 475      47.000  -4.480  70.720  1.00  0.00           C
ATOM   2801  HB1 LEU A 475      47.160  -4.820  69.700  1.00  0.00           H
ATOM   2802  HB2 LEU A 475      47.040  -3.390  70.780  1.00  0.00           H
ATOM   2803  CG  LEU A 475      45.640  -4.860  71.290  1.00  0.00           C
ATOM   2804  HG  LEU A 475      45.720  -5.920  71.530  1.00  0.00           H
ATOM   2805  CD1 LEU A 475      45.340  -4.100  72.630  1.00  0.00           C
ATOM   2806 1HD1 LEU A 475      44.350  -4.350  73.000  1.00  0.00           H
ATOM   2807 2HD1 LEU A 475      46.170  -4.140  73.340  1.00  0.00           H
ATOM   2808 3HD1 LEU A 475      45.390  -3.060  72.310  1.00  0.00           H
ATOM   2809  CD2 LEU A 475      44.540  -4.590  70.230  1.00  0.00           C
ATOM   2810 1HD2 LEU A 475      43.620  -5.000  70.650  1.00  0.00           H
ATOM   2811 2HD2 LEU A 475      44.450  -3.530  69.970  1.00  0.00           H
ATOM   2812 3HD2 LEU A 475      44.820  -5.100  69.310  1.00  0.00           H
ATOM   2813  C   LEU A 475      48.200  -6.690  71.380  1.00  0.00           C
ATOM   2814  O   LEU A 475      48.040  -7.250  70.310  1.00  0.00           O
ATOM   2815  N   VAL A 476      48.260  -7.470  72.510  1.00  0.00           N
ATOM   2816  H   VAL A 476      48.160  -7.010  73.400  1.00  0.00           H
ATOM   2817  CA  VAL A 476      48.770  -8.870  72.670  1.00  0.00           C
ATOM   2818  HA  VAL A 476      48.360  -9.390  71.800  1.00  0.00           H
ATOM   2819  CB  VAL A 476      50.340  -8.920  72.740  1.00  0.00           C
ATOM   2820  HB  VAL A 476      50.710  -9.940  72.790  1.00  0.00           H
ATOM   2821  CG1 VAL A 476      51.000  -8.270  71.500  1.00  0.00           C
ATOM   2822 1HG1 VAL A 476      52.050  -8.540  71.470  1.00  0.00           H
ATOM   2823 2HG1 VAL A 476      50.530  -8.680  70.600  1.00  0.00           H
ATOM   2824 3HG1 VAL A 476      50.970  -7.180  71.550  1.00  0.00           H
ATOM   2825  CG2 VAL A 476      50.700  -8.050  74.050  1.00  0.00           C
ATOM   2826 1HG2 VAL A 476      51.720  -8.170  74.430  1.00  0.00           H
ATOM   2827 2HG2 VAL A 476      50.520  -6.990  73.900  1.00  0.00           H
ATOM   2828 3HG2 VAL A 476      50.140  -8.360  74.930  1.00  0.00           H
ATOM   2829  C   VAL A 476      48.140  -9.490  73.880  1.00  0.00           C
ATOM   2830  O   VAL A 476      47.670  -8.910  74.840  1.00  0.00           O
ATOM   2831  N   GLY A 477      48.160 -10.820  73.920  1.00  0.00           N
ATOM   2832  H   GLY A 477      48.540 -11.340  73.140  1.00  0.00           H
ATOM   2833  CA  GLY A 477      47.590 -11.710  75.020  1.00  0.00           C
ATOM   2834  HA1 GLY A 477      47.870 -11.210  75.950  1.00  0.00           H
ATOM   2835  HA2 GLY A 477      48.080 -12.680  75.010  1.00  0.00           H
ATOM   2836  C   GLY A 477      46.070 -11.860  74.940  1.00  0.00           C
ATOM   2837  O   GLY A 477      45.360 -11.230  74.140  1.00  0.00           O
ATOM   2838  N   THR A 478      45.590 -12.720  75.870  1.00  0.00           N
ATOM   2839  H   THR A 478      46.270 -13.060  76.540  1.00  0.00           H
ATOM   2840  CA  THR A 478      44.190 -13.110  76.090  1.00  0.00           C
ATOM   2841  HA  THR A 478      43.500 -12.380  75.680  1.00  0.00           H
ATOM   2842  CB  THR A 478      43.870 -14.540  75.480  1.00  0.00           C
ATOM   2843  HB  THR A 478      42.970 -14.950  75.940  1.00  0.00           H
ATOM   2844  CG2 THR A 478      43.660 -14.450  74.010  1.00  0.00           C
ATOM   2845 1HG2 THR A 478      44.560 -14.160  73.470  1.00  0.00           H
ATOM   2846 2HG2 THR A 478      43.450 -15.480  73.730  1.00  0.00           H
ATOM   2847 3HG2 THR A 478      42.790 -13.910  73.630  1.00  0.00           H
ATOM   2848  OG1 THR A 478      44.940 -15.490  75.610  1.00  0.00           O
ATOM   2849  HG1 THR A 478      45.730 -14.940  75.640  1.00  0.00           H
ATOM   2850  C   THR A 478      43.900 -13.150  77.580  1.00  0.00           C
ATOM   2851  O   THR A 478      44.840 -13.410  78.340  1.00  0.00           O
ATOM   2852  N   PRO A 479      42.610 -12.970  78.020  1.00  0.00           N
ATOM   2853  CD  PRO A 479      41.380 -13.130  77.270  1.00  0.00           C
ATOM   2854  HD1 PRO A 479      41.090 -14.180  77.210  1.00  0.00           H
ATOM   2855  HD2 PRO A 479      41.510 -12.740  76.250  1.00  0.00           H
ATOM   2856  CG  PRO A 479      40.270 -12.360  78.060  1.00  0.00           C
ATOM   2857  HG1 PRO A 479      39.230 -12.690  77.960  1.00  0.00           H
ATOM   2858  HG2 PRO A 479      40.390 -11.290  77.910  1.00  0.00           H
ATOM   2859  CB  PRO A 479      40.780 -12.560  79.470  1.00  0.00           C
ATOM   2860  HB1 PRO A 479      40.610 -13.600  79.780  1.00  0.00           H
ATOM   2861  HB2 PRO A 479      40.390 -11.810  80.140  1.00  0.00           H
ATOM   2862  CA  PRO A 479      42.270 -12.440  79.390  1.00  0.00           C
ATOM   2863  HA  PRO A 479      42.450 -11.380  79.550  1.00  0.00           H
ATOM   2864  C   PRO A 479      42.970 -13.170  80.560  1.00  0.00           C
ATOM   2865  O   PRO A 479      43.570 -12.570  81.460  1.00  0.00           O
ATOM   2866  N   TYR A 480      42.880 -14.510  80.530  1.00  0.00           N
ATOM   2867  H   TYR A 480      42.670 -15.000  79.670  1.00  0.00           H
ATOM   2868  CA  TYR A 480      43.280 -15.360  81.760  1.00  0.00           C
ATOM   2869  HA  TYR A 480      42.850 -15.060  82.720  1.00  0.00           H
ATOM   2870  CB  TYR A 480      42.860 -16.810  81.460  1.00  0.00           C
ATOM   2871  HB1 TYR A 480      42.890 -17.380  82.390  1.00  0.00           H
ATOM   2872  HB2 TYR A 480      43.530 -17.270  80.730  1.00  0.00           H
ATOM   2873  CG  TYR A 480      41.360 -16.820  81.050  1.00  0.00           C
ATOM   2874  CD1 TYR A 480      40.310 -16.520  81.960  1.00  0.00           C
ATOM   2875  HD1 TYR A 480      40.490 -16.080  82.930  1.00  0.00           H
ATOM   2876  CE1 TYR A 480      38.950 -16.640  81.510  1.00  0.00           C
ATOM   2877  HE1 TYR A 480      38.180 -16.430  82.240  1.00  0.00           H
ATOM   2878  CZ  TYR A 480      38.560 -17.010  80.220  1.00  0.00           C
ATOM   2879  OH  TYR A 480      37.300 -16.910  79.720  1.00  0.00           O
ATOM   2880  HH  TYR A 480      36.710 -16.540  80.380  1.00  0.00           H
ATOM   2881  CE2 TYR A 480      39.650 -17.280  79.310  1.00  0.00           C
ATOM   2882  HE2 TYR A 480      39.350 -17.630  78.340  1.00  0.00           H
ATOM   2883  CD2 TYR A 480      41.020 -17.140  79.710  1.00  0.00           C
ATOM   2884  HD2 TYR A 480      41.730 -17.390  78.930  1.00  0.00           H
ATOM   2885  C   TYR A 480      44.830 -15.270  81.920  1.00  0.00           C
ATOM   2886  O   TYR A 480      45.370 -15.370  83.050  1.00  0.00           O
ATOM   2887  N   TRP A 481      45.610 -15.020  80.810  1.00  0.00           N
ATOM   2888  H   TRP A 481      45.170 -15.090  79.910  1.00  0.00           H
ATOM   2889  CA  TRP A 481      47.130 -15.060  80.900  1.00  0.00           C
ATOM   2890  HA  TRP A 481      47.330 -15.270  81.950  1.00  0.00           H
ATOM   2891  CB  TRP A 481      47.790 -16.160  80.050  1.00  0.00           C
ATOM   2892  HB1 TRP A 481      48.840 -16.160  80.350  1.00  0.00           H
ATOM   2893  HB2 TRP A 481      47.750 -15.870  79.000  1.00  0.00           H
ATOM   2894  CG  TRP A 481      47.280 -17.530  80.170  1.00  0.00           C
ATOM   2895  CD1 TRP A 481      47.740 -18.520  80.960  1.00  0.00           C
ATOM   2896  HD1 TRP A 481      48.620 -18.330  81.550  1.00  0.00           H
ATOM   2897  NE1 TRP A 481      47.080 -19.740  80.770  1.00  0.00           N
ATOM   2898  HE1 TRP A 481      47.300 -20.610  81.230  1.00  0.00           H
ATOM   2899  CE2 TRP A 481      46.080 -19.510  79.880  1.00  0.00           C
ATOM   2900  CZ2 TRP A 481      45.110 -20.360  79.390  1.00  0.00           C
ATOM   2901  HZ2 TRP A 481      45.150 -21.420  79.580  1.00  0.00           H
ATOM   2902  CH2 TRP A 481      44.160 -19.860  78.530  1.00  0.00           C
ATOM   2903  HH2 TRP A 481      43.480 -20.620  78.160  1.00  0.00           H
ATOM   2904  CZ3 TRP A 481      44.180 -18.520  78.130  1.00  0.00           C
ATOM   2905  HZ3 TRP A 481      43.370 -18.110  77.560  1.00  0.00           H
ATOM   2906  CE3 TRP A 481      45.160 -17.670  78.640  1.00  0.00           C
ATOM   2907  HE3 TRP A 481      45.170 -16.650  78.280  1.00  0.00           H
ATOM   2908  CD2 TRP A 481      46.120 -18.110  79.540  1.00  0.00           C
ATOM   2909  C   TRP A 481      47.810 -13.690  80.580  1.00  0.00           C
ATOM   2910  O   TRP A 481      49.030 -13.490  80.650  1.00  0.00           O
ATOM   2911  N   MET A 482      47.060 -12.650  80.290  1.00  0.00           N
ATOM   2912  H   MET A 482      46.060 -12.790  80.310  1.00  0.00           H
ATOM   2913  CA  MET A 482      47.600 -11.290  80.090  1.00  0.00           C
ATOM   2914  HA  MET A 482      48.650 -11.390  79.840  1.00  0.00           H
ATOM   2915  CB  MET A 482      46.830 -10.580  78.910  1.00  0.00           C
ATOM   2916  HB1 MET A 482      46.970 -11.200  78.020  1.00  0.00           H
ATOM   2917  HB2 MET A 482      47.320  -9.620  78.810  1.00  0.00           H
ATOM   2918  CG  MET A 482      45.360 -10.330  79.250  1.00  0.00           C
ATOM   2919  HG1 MET A 482      45.160  -9.480  79.910  1.00  0.00           H
ATOM   2920  HG2 MET A 482      44.900 -11.130  79.830  1.00  0.00           H
ATOM   2921  SD  MET A 482      44.250 -10.100  77.810  1.00  0.00           S
ATOM   2922  CE  MET A 482      44.900  -8.580  77.060  1.00  0.00           C
ATOM   2923  HE1 MET A 482      44.840  -7.740  77.750  1.00  0.00           H
ATOM   2924  HE2 MET A 482      45.920  -8.890  76.850  1.00  0.00           H
ATOM   2925  HE3 MET A 482      44.360  -8.390  76.130  1.00  0.00           H
ATOM   2926  C   MET A 482      47.600 -10.420  81.400  1.00  0.00           C
ATOM   2927  O   MET A 482      46.600 -10.450  82.140  1.00  0.00           O
ATOM   2928  N   ALA A 483      48.580  -9.540  81.630  1.00  0.00           N
ATOM   2929  H   ALA A 483      49.250  -9.490  80.870  1.00  0.00           H
ATOM   2930  CA  ALA A 483      48.790  -8.650  82.740  1.00  0.00           C
ATOM   2931  HA  ALA A 483      48.660  -9.220  83.660  1.00  0.00           H
ATOM   2932  CB  ALA A 483      50.290  -8.330  82.880  1.00  0.00           C
ATOM   2933  HB1 ALA A 483      50.590  -7.890  83.830  1.00  0.00           H
ATOM   2934  HB2 ALA A 483      50.870  -9.230  82.640  1.00  0.00           H
ATOM   2935  HB3 ALA A 483      50.310  -7.610  82.060  1.00  0.00           H
ATOM   2936  C   ALA A 483      47.800  -7.490  82.820  1.00  0.00           C
ATOM   2937  O   ALA A 483      47.270  -7.190  81.780  1.00  0.00           O
ATOM   2938  N   PRO A 484      47.570  -6.900  84.020  1.00  0.00           N
ATOM   2939  CD  PRO A 484      48.190  -7.360  85.270  1.00  0.00           C
ATOM   2940  HD1 PRO A 484      49.230  -7.040  85.390  1.00  0.00           H
ATOM   2941  HD2 PRO A 484      48.060  -8.430  85.410  1.00  0.00           H
ATOM   2942  CG  PRO A 484      47.270  -6.700  86.340  1.00  0.00           C
ATOM   2943  HG1 PRO A 484      47.780  -6.610  87.300  1.00  0.00           H
ATOM   2944  HG2 PRO A 484      46.380  -7.320  86.440  1.00  0.00           H
ATOM   2945  CB  PRO A 484      46.840  -5.390  85.730  1.00  0.00           C
ATOM   2946  HB1 PRO A 484      47.650  -4.690  85.950  1.00  0.00           H
ATOM   2947  HB2 PRO A 484      45.880  -5.100  86.160  1.00  0.00           H
ATOM   2948  CA  PRO A 484      46.650  -5.780  84.260  1.00  0.00           C
ATOM   2949  HA  PRO A 484      45.640  -6.150  84.090  1.00  0.00           H
ATOM   2950  C   PRO A 484      47.000  -4.590  83.300  1.00  0.00           C
ATOM   2951  O   PRO A 484      46.130  -4.090  82.700  1.00  0.00           O
ATOM   2952  N   GLU A 485      48.330  -4.450  83.030  1.00  0.00           N
ATOM   2953  H   GLU A 485      48.940  -4.970  83.650  1.00  0.00           H
ATOM   2954  CA  GLU A 485      48.810  -3.350  82.140  1.00  0.00           C
ATOM   2955  HA  GLU A 485      48.420  -2.390  82.490  1.00  0.00           H
ATOM   2956  CB  GLU A 485      50.370  -3.240  82.080  1.00  0.00           C
ATOM   2957  HB1 GLU A 485      50.630  -2.800  83.040  1.00  0.00           H
ATOM   2958  HB2 GLU A 485      50.660  -2.540  81.300  1.00  0.00           H
ATOM   2959  CG  GLU A 485      51.190  -4.500  81.900  1.00  0.00           C
ATOM   2960  HG1 GLU A 485      52.080  -4.130  81.390  1.00  0.00           H
ATOM   2961  HG2 GLU A 485      50.710  -5.250  81.270  1.00  0.00           H
ATOM   2962  CD  GLU A 485      51.620  -5.020  83.330  1.00  0.00           C
ATOM   2963  OE1 GLU A 485      50.740  -5.160  84.180  1.00  0.00           O
ATOM   2964  OE2 GLU A 485      52.820  -5.110  83.580  1.00  0.00           O
ATOM   2965  C   GLU A 485      48.400  -3.540  80.630  1.00  0.00           C
ATOM   2966  O   GLU A 485      47.670  -2.700  80.150  1.00  0.00           O
ATOM   2967  N   LEU A 486      48.480  -4.780  80.130  1.00  0.00           N
ATOM   2968  H   LEU A 486      48.890  -5.550  80.630  1.00  0.00           H
ATOM   2969  CA  LEU A 486      47.880  -5.160  78.830  1.00  0.00           C
ATOM   2970  HA  LEU A 486      48.210  -4.430  78.090  1.00  0.00           H
ATOM   2971  CB  LEU A 486      48.490  -6.550  78.420  1.00  0.00           C
ATOM   2972  HB1 LEU A 486      48.130  -6.820  77.430  1.00  0.00           H
ATOM   2973  HB2 LEU A 486      47.950  -7.260  79.040  1.00  0.00           H
ATOM   2974  CG  LEU A 486      49.990  -6.750  78.570  1.00  0.00           C
ATOM   2975  HG  LEU A 486      50.280  -6.350  79.540  1.00  0.00           H
ATOM   2976  CD1 LEU A 486      50.240  -8.260  78.490  1.00  0.00           C
ATOM   2977 1HD1 LEU A 486      49.780  -8.690  79.380  1.00  0.00           H
ATOM   2978 2HD1 LEU A 486      49.900  -8.750  77.580  1.00  0.00           H
ATOM   2979 3HD1 LEU A 486      51.310  -8.500  78.510  1.00  0.00           H
ATOM   2980  CD2 LEU A 486      50.690  -6.070  77.360  1.00  0.00           C
ATOM   2981 1HD2 LEU A 486      50.410  -5.020  77.420  1.00  0.00           H
ATOM   2982 2HD2 LEU A 486      51.770  -6.220  77.330  1.00  0.00           H
ATOM   2983 3HD2 LEU A 486      50.230  -6.380  76.430  1.00  0.00           H
ATOM   2984  C   LEU A 486      46.340  -5.140  78.810  1.00  0.00           C
ATOM   2985  O   LEU A 486      45.870  -4.760  77.790  1.00  0.00           O
ATOM   2986  N   ILE A 487      45.700  -5.360  79.940  1.00  0.00           N
ATOM   2987  H   ILE A 487      46.200  -5.780  80.710  1.00  0.00           H
ATOM   2988  CA  ILE A 487      44.200  -5.210  80.160  1.00  0.00           C
ATOM   2989  HA  ILE A 487      43.650  -5.600  79.300  1.00  0.00           H
ATOM   2990  CB  ILE A 487      43.750  -5.990  81.350  1.00  0.00           C
ATOM   2991  HB  ILE A 487      44.200  -5.560  82.250  1.00  0.00           H
ATOM   2992  CG2 ILE A 487      42.280  -5.740  81.620  1.00  0.00           C
ATOM   2993 1HG2 ILE A 487      41.710  -5.780  80.690  1.00  0.00           H
ATOM   2994 2HG2 ILE A 487      41.870  -6.530  82.250  1.00  0.00           H
ATOM   2995 3HG2 ILE A 487      42.030  -4.760  82.030  1.00  0.00           H
ATOM   2996  CG1 ILE A 487      43.950  -7.470  81.220  1.00  0.00           C
ATOM   2997 1HG1 ILE A 487      45.000  -7.510  80.940  1.00  0.00           H
ATOM   2998 2HG1 ILE A 487      43.390  -7.840  80.360  1.00  0.00           H
ATOM   2999  CD  ILE A 487      43.740  -8.270  82.540  1.00  0.00           C
ATOM   3000  HD1 ILE A 487      44.380  -9.140  82.690  1.00  0.00           H
ATOM   3001  HD2 ILE A 487      44.070  -7.620  83.340  1.00  0.00           H
ATOM   3002  HD3 ILE A 487      42.720  -8.680  82.590  1.00  0.00           H
ATOM   3003  C   ILE A 487      43.750  -3.760  80.240  1.00  0.00           C
ATOM   3004  O   ILE A 487      42.730  -3.370  79.650  1.00  0.00           O
ATOM   3005  N   SER A 488      44.570  -2.860  80.750  1.00  0.00           N
ATOM   3006  H   SER A 488      45.380  -3.270  81.200  1.00  0.00           H
ATOM   3007  CA  SER A 488      44.460  -1.420  80.670  1.00  0.00           C
ATOM   3008  HA  SER A 488      43.440  -1.070  80.510  1.00  0.00           H
ATOM   3009  CB  SER A 488      45.120  -0.760  81.870  1.00  0.00           C
ATOM   3010  HB1 SER A 488      44.910   0.310  81.880  1.00  0.00           H
ATOM   3011  HB2 SER A 488      46.190  -0.980  81.840  1.00  0.00           H
ATOM   3012  OG  SER A 488      44.650  -1.400  83.050  1.00  0.00           O
ATOM   3013  HG  SER A 488      45.090  -2.250  83.050  1.00  0.00           H
ATOM   3014  C   SER A 488      45.120  -0.790  79.400  1.00  0.00           C
ATOM   3015  O   SER A 488      45.170   0.430  79.310  1.00  0.00           O
ATOM   3016  N   ARG A 489      45.710  -1.640  78.470  1.00  0.00           N
ATOM   3017  H   ARG A 489      45.590  -2.620  78.690  1.00  0.00           H
ATOM   3018  CA  ARG A 489      46.290  -1.260  77.150  1.00  0.00           C
ATOM   3019  HA  ARG A 489      46.780  -2.130  76.720  1.00  0.00           H
ATOM   3020  CB  ARG A 489      45.220  -0.790  76.170  1.00  0.00           C
ATOM   3021  HB1 ARG A 489      45.640  -0.290  75.300  1.00  0.00           H
ATOM   3022  HB2 ARG A 489      44.600  -0.020  76.620  1.00  0.00           H
ATOM   3023  CG  ARG A 489      44.220  -1.870  75.720  1.00  0.00           C
ATOM   3024  HG1 ARG A 489      43.800  -2.330  76.610  1.00  0.00           H
ATOM   3025  HG2 ARG A 489      44.640  -2.700  75.150  1.00  0.00           H
ATOM   3026  CD  ARG A 489      42.950  -1.370  74.990  1.00  0.00           C
ATOM   3027  HD1 ARG A 489      43.230  -0.950  74.020  1.00  0.00           H
ATOM   3028  HD2 ARG A 489      42.620  -0.550  75.620  1.00  0.00           H
ATOM   3029  NE  ARG A 489      41.920  -2.370  74.840  1.00  0.00           N
ATOM   3030  HE  ARG A 489      42.120  -3.270  75.240  1.00  0.00           H
ATOM   3031  CZ  ARG A 489      40.890  -2.300  74.020  1.00  0.00           C
ATOM   3032  NH1 ARG A 489      40.060  -3.280  73.930  1.00  0.00           N
ATOM   3033 1HH1 ARG A 489      40.110  -4.090  74.540  1.00  0.00           H
ATOM   3034 2HH1 ARG A 489      39.300  -3.260  73.270  1.00  0.00           H
ATOM   3035  NH2 ARG A 489      40.670  -1.210  73.360  1.00  0.00           N
ATOM   3036 1HH2 ARG A 489      40.990  -0.350  73.780  1.00  0.00           H
ATOM   3037 2HH2 ARG A 489      40.150  -1.310  72.500  1.00  0.00           H
ATOM   3038  C   ARG A 489      47.460  -0.320  77.350  1.00  0.00           C
ATOM   3039  O   ARG A 489      47.690   0.510  76.410  1.00  0.00           O
ATOM   3040  N   LEU A 490      48.130  -0.320  78.490  1.00  0.00           N
ATOM   3041  H   LEU A 490      47.900  -1.010  79.190  1.00  0.00           H
ATOM   3042  CA  LEU A 490      49.260   0.520  78.730  1.00  0.00           C
ATOM   3043  HA  LEU A 490      48.900   1.520  78.510  1.00  0.00           H
ATOM   3044  CB  LEU A 490      49.690   0.590  80.210  1.00  0.00           C
ATOM   3045  HB1 LEU A 490      50.240   1.520  80.350  1.00  0.00           H
ATOM   3046  HB2 LEU A 490      50.390  -0.210  80.430  1.00  0.00           H
ATOM   3047  CG  LEU A 490      48.610   0.560  81.270  1.00  0.00           C
ATOM   3048  HG  LEU A 490      47.950  -0.290  81.130  1.00  0.00           H
ATOM   3049  CD1 LEU A 490      49.200   0.360  82.690  1.00  0.00           C
ATOM   3050 1HD1 LEU A 490      49.540   1.340  83.030  1.00  0.00           H
ATOM   3051 2HD1 LEU A 490      48.430  -0.010  83.380  1.00  0.00           H
ATOM   3052 3HD1 LEU A 490      50.020  -0.340  82.520  1.00  0.00           H
ATOM   3053  CD2 LEU A 490      47.640   1.770  81.210  1.00  0.00           C
ATOM   3054 1HD2 LEU A 490      46.890   1.720  82.000  1.00  0.00           H
ATOM   3055 2HD2 LEU A 490      48.200   2.690  81.410  1.00  0.00           H
ATOM   3056 3HD2 LEU A 490      47.150   1.820  80.230  1.00  0.00           H
ATOM   3057  C   LEU A 490      50.450   0.180  77.870  1.00  0.00           C
ATOM   3058  O   LEU A 490      50.400  -0.800  77.110  1.00  0.00           O
ATOM   3059  N   PRO A 491      51.530   1.000  77.860  1.00  0.00           N
ATOM   3060  CD  PRO A 491      51.570   2.380  78.120  1.00  0.00           C
ATOM   3061  HD1 PRO A 491      51.670   2.540  79.200  1.00  0.00           H
ATOM   3062  HD2 PRO A 491      50.640   2.860  77.800  1.00  0.00           H
ATOM   3063  CG  PRO A 491      52.810   2.910  77.440  1.00  0.00           C
ATOM   3064  HG1 PRO A 491      53.220   3.720  78.060  1.00  0.00           H
ATOM   3065  HG2 PRO A 491      52.640   3.210  76.410  1.00  0.00           H
ATOM   3066  CB  PRO A 491      53.790   1.770  77.430  1.00  0.00           C
ATOM   3067  HB1 PRO A 491      54.420   1.730  78.310  1.00  0.00           H
ATOM   3068  HB2 PRO A 491      54.490   1.750  76.600  1.00  0.00           H
ATOM   3069  CA  PRO A 491      52.910   0.560  77.540  1.00  0.00           C
ATOM   3070  HA  PRO A 491      52.890   0.020  76.590  1.00  0.00           H
ATOM   3071  C   PRO A 491      53.420  -0.340  78.700  1.00  0.00           C
ATOM   3072  O   PRO A 491      53.020  -0.140  79.890  1.00  0.00           O
ATOM   3073  N   TYR A 492      54.300  -1.250  78.340  1.00  0.00           N
ATOM   3074  H   TYR A 492      54.610  -1.320  77.380  1.00  0.00           H
ATOM   3075  CA  TYR A 492      54.810  -2.330  79.250  1.00  0.00           C
ATOM   3076  HA  TYR A 492      54.760  -1.890  80.240  1.00  0.00           H
ATOM   3077  CB  TYR A 492      53.940  -3.590  79.110  1.00  0.00           C
ATOM   3078  HB1 TYR A 492      52.920  -3.280  79.320  1.00  0.00           H
ATOM   3079  HB2 TYR A 492      54.080  -4.350  79.880  1.00  0.00           H
ATOM   3080  CG  TYR A 492      53.900  -4.270  77.710  1.00  0.00           C
ATOM   3081  CD1 TYR A 492      54.800  -5.190  77.220  1.00  0.00           C
ATOM   3082  HD1 TYR A 492      55.490  -5.620  77.930  1.00  0.00           H
ATOM   3083  CE1 TYR A 492      54.760  -5.670  75.900  1.00  0.00           C
ATOM   3084  HE1 TYR A 492      55.470  -6.440  75.650  1.00  0.00           H
ATOM   3085  CZ  TYR A 492      53.680  -5.250  75.050  1.00  0.00           C
ATOM   3086  OH  TYR A 492      53.530  -5.600  73.760  1.00  0.00           O
ATOM   3087  HH  TYR A 492      52.630  -5.520  73.430  1.00  0.00           H
ATOM   3088  CE2 TYR A 492      52.750  -4.230  75.430  1.00  0.00           C
ATOM   3089  HE2 TYR A 492      51.920  -3.900  74.820  1.00  0.00           H
ATOM   3090  CD2 TYR A 492      52.880  -3.810  76.790  1.00  0.00           C
ATOM   3091  HD2 TYR A 492      52.090  -3.130  77.060  1.00  0.00           H
ATOM   3092  C   TYR A 492      56.210  -2.840  79.050  1.00  0.00           C
ATOM   3093  O   TYR A 492      56.850  -2.560  78.060  1.00  0.00           O
ATOM   3094  N   GLY A 493      56.730  -3.530  80.060  1.00  0.00           N
ATOM   3095  H   GLY A 493      56.210  -3.620  80.910  1.00  0.00           H
ATOM   3096  CA  GLY A 493      58.010  -4.170  80.000  1.00  0.00           C
ATOM   3097  HA1 GLY A 493      58.670  -3.630  80.670  1.00  0.00           H
ATOM   3098  HA2 GLY A 493      58.540  -4.020  79.060  1.00  0.00           H
ATOM   3099  C   GLY A 493      57.940  -5.690  80.250  1.00  0.00           C
ATOM   3100  O   GLY A 493      56.890  -6.310  80.320  1.00  0.00           O
ATOM   3101  N   PRO A 494      59.060  -6.450  80.430  1.00  0.00           N
ATOM   3102  CD  PRO A 494      60.420  -5.990  80.230  1.00  0.00           C
ATOM   3103  HD1 PRO A 494      60.650  -5.180  80.930  1.00  0.00           H
ATOM   3104  HD2 PRO A 494      60.590  -5.690  79.200  1.00  0.00           H
ATOM   3105  CG  PRO A 494      61.420  -7.090  80.740  1.00  0.00           C
ATOM   3106  HG1 PRO A 494      61.650  -6.990  81.800  1.00  0.00           H
ATOM   3107  HG2 PRO A 494      62.350  -7.060  80.150  1.00  0.00           H
ATOM   3108  CB  PRO A 494      60.590  -8.290  80.580  1.00  0.00           C
ATOM   3109  HB1 PRO A 494      61.000  -9.020  81.270  1.00  0.00           H
ATOM   3110  HB2 PRO A 494      60.720  -8.840  79.650  1.00  0.00           H
ATOM   3111  CA  PRO A 494      59.130  -7.830  80.820  1.00  0.00           C
ATOM   3112  HA  PRO A 494      58.530  -8.320  80.060  1.00  0.00           H
ATOM   3113  C   PRO A 494      58.460  -8.110  82.170  1.00  0.00           C
ATOM   3114  O   PRO A 494      58.190  -9.310  82.410  1.00  0.00           O
ATOM   3115  N   GLU A 495      58.060  -7.180  83.010  1.00  0.00           N
ATOM   3116  H   GLU A 495      58.310  -6.220  82.840  1.00  0.00           H
ATOM   3117  CA  GLU A 495      57.080  -7.570  84.110  1.00  0.00           C
ATOM   3118  HA  GLU A 495      57.660  -8.140  84.840  1.00  0.00           H
ATOM   3119  CB  GLU A 495      56.600  -6.270  84.800  1.00  0.00           C
ATOM   3120  HB1 GLU A 495      56.130  -6.500  85.760  1.00  0.00           H
ATOM   3121  HB2 GLU A 495      55.750  -5.820  84.280  1.00  0.00           H
ATOM   3122  CG  GLU A 495      57.710  -5.230  85.050  1.00  0.00           C
ATOM   3123  HG1 GLU A 495      58.640  -5.730  85.300  1.00  0.00           H
ATOM   3124  HG2 GLU A 495      57.430  -4.690  85.950  1.00  0.00           H
ATOM   3125  CD  GLU A 495      57.890  -4.150  83.940  1.00  0.00           C
ATOM   3126  OE1 GLU A 495      58.880  -4.320  83.130  1.00  0.00           O
ATOM   3127  OE2 GLU A 495      57.060  -3.200  83.840  1.00  0.00           O
ATOM   3128  C   GLU A 495      55.850  -8.360  83.700  1.00  0.00           C
ATOM   3129  O   GLU A 495      55.310  -9.030  84.550  1.00  0.00           O
ATOM   3130  N   VAL A 496      55.400  -8.310  82.420  1.00  0.00           N
ATOM   3131  H   VAL A 496      55.900  -7.630  81.870  1.00  0.00           H
ATOM   3132  CA  VAL A 496      54.230  -9.180  81.900  1.00  0.00           C
ATOM   3133  HA  VAL A 496      53.480  -9.120  82.680  1.00  0.00           H
ATOM   3134  CB  VAL A 496      53.550  -8.630  80.660  1.00  0.00           C
ATOM   3135  HB  VAL A 496      52.610  -9.170  80.550  1.00  0.00           H
ATOM   3136  CG1 VAL A 496      53.200  -7.080  80.840  1.00  0.00           C
ATOM   3137 1HG1 VAL A 496      52.490  -6.780  80.080  1.00  0.00           H
ATOM   3138 2HG1 VAL A 496      52.780  -6.860  81.820  1.00  0.00           H
ATOM   3139 3HG1 VAL A 496      54.050  -6.420  80.670  1.00  0.00           H
ATOM   3140  CG2 VAL A 496      54.280  -8.870  79.340  1.00  0.00           C
ATOM   3141 1HG2 VAL A 496      55.320  -8.530  79.320  1.00  0.00           H
ATOM   3142 2HG2 VAL A 496      54.330  -9.950  79.190  1.00  0.00           H
ATOM   3143 3HG2 VAL A 496      53.660  -8.490  78.540  1.00  0.00           H
ATOM   3144  C   VAL A 496      54.520 -10.710  81.800  1.00  0.00           C
ATOM   3145  O   VAL A 496      53.640 -11.570  81.870  1.00  0.00           O
ATOM   3146  N   ASP A 497      55.780 -11.150  81.560  1.00  0.00           N
ATOM   3147  H   ASP A 497      56.490 -10.440  81.570  1.00  0.00           H
ATOM   3148  CA  ASP A 497      56.220 -12.530  81.590  1.00  0.00           C
ATOM   3149  HA  ASP A 497      55.460 -13.110  81.070  1.00  0.00           H
ATOM   3150  CB  ASP A 497      57.590 -12.750  80.840  1.00  0.00           C
ATOM   3151  HB1 ASP A 497      57.860 -13.810  80.800  1.00  0.00           H
ATOM   3152  HB2 ASP A 497      58.310 -12.200  81.450  1.00  0.00           H
ATOM   3153  CG  ASP A 497      57.630 -12.120  79.370  1.00  0.00           C
ATOM   3154  OD1 ASP A 497      56.570 -11.900  78.700  1.00  0.00           O
ATOM   3155  OD2 ASP A 497      58.680 -12.150  78.780  1.00  0.00           O
ATOM   3156  C   ASP A 497      56.280 -13.070  83.010  1.00  0.00           C
ATOM   3157  O   ASP A 497      55.880 -14.200  83.160  1.00  0.00           O
ATOM   3158  N   ILE A 498      56.730 -12.200  83.920  1.00  0.00           N
ATOM   3159  H   ILE A 498      57.200 -11.330  83.700  1.00  0.00           H
ATOM   3160  CA  ILE A 498      56.650 -12.450  85.400  1.00  0.00           C
ATOM   3161  HA  ILE A 498      57.190 -13.360  85.690  1.00  0.00           H
ATOM   3162  CB  ILE A 498      57.380 -11.340  86.210  1.00  0.00           C
ATOM   3163  HB  ILE A 498      56.830 -10.410  86.070  1.00  0.00           H
ATOM   3164  CG2 ILE A 498      57.320 -11.670  87.730  1.00  0.00           C
ATOM   3165 1HG2 ILE A 498      56.280 -11.840  88.020  1.00  0.00           H
ATOM   3166 2HG2 ILE A 498      57.810 -12.630  87.850  1.00  0.00           H
ATOM   3167 3HG2 ILE A 498      57.700 -10.920  88.420  1.00  0.00           H
ATOM   3168  CG1 ILE A 498      58.880 -10.940  85.840  1.00  0.00           C
ATOM   3169 1HG1 ILE A 498      59.180 -10.100  86.460  1.00  0.00           H
ATOM   3170 2HG1 ILE A 498      59.040 -10.520  84.850  1.00  0.00           H
ATOM   3171  CD  ILE A 498      59.880 -12.100  86.020  1.00  0.00           C
ATOM   3172  HD1 ILE A 498      59.820 -12.540  87.020  1.00  0.00           H
ATOM   3173  HD2 ILE A 498      59.680 -12.850  85.260  1.00  0.00           H
ATOM   3174  HD3 ILE A 498      60.880 -11.680  85.910  1.00  0.00           H
ATOM   3175  C   ILE A 498      55.110 -12.690  85.820  1.00  0.00           C
ATOM   3176  O   ILE A 498      54.850 -13.660  86.540  1.00  0.00           O
ATOM   3177  N   TRP A 499      54.210 -11.830  85.350  1.00  0.00           N
ATOM   3178  H   TRP A 499      54.490 -11.020  84.810  1.00  0.00           H
ATOM   3179  CA  TRP A 499      52.780 -11.980  85.600  1.00  0.00           C
ATOM   3180  HA  TRP A 499      52.620 -11.980  86.670  1.00  0.00           H
ATOM   3181  CB  TRP A 499      51.990 -10.840  84.950  1.00  0.00           C
ATOM   3182  HB1 TRP A 499      52.250 -10.790  83.900  1.00  0.00           H
ATOM   3183  HB2 TRP A 499      52.320  -9.870  85.340  1.00  0.00           H
ATOM   3184  CG  TRP A 499      50.480 -11.020  85.130  1.00  0.00           C
ATOM   3185  CD1 TRP A 499      49.600 -11.470  84.230  1.00  0.00           C
ATOM   3186  HD1 TRP A 499      49.920 -11.710  83.230  1.00  0.00           H
ATOM   3187  NE1 TRP A 499      48.370 -11.680  84.850  1.00  0.00           N
ATOM   3188  HE1 TRP A 499      47.560 -12.150  84.460  1.00  0.00           H
ATOM   3189  CE2 TRP A 499      48.350 -11.050  86.070  1.00  0.00           C
ATOM   3190  CZ2 TRP A 499      47.320 -10.790  86.940  1.00  0.00           C
ATOM   3191  HZ2 TRP A 499      46.370 -11.250  86.740  1.00  0.00           H
ATOM   3192  CH2 TRP A 499      47.550 -10.030  88.140  1.00  0.00           C
ATOM   3193  HH2 TRP A 499      46.740  -9.860  88.830  1.00  0.00           H
ATOM   3194  CZ3 TRP A 499      48.830  -9.550  88.420  1.00  0.00           C
ATOM   3195  HZ3 TRP A 499      48.980  -9.000  89.340  1.00  0.00           H
ATOM   3196  CE3 TRP A 499      49.870  -9.850  87.430  1.00  0.00           C
ATOM   3197  HE3 TRP A 499      50.870  -9.490  87.580  1.00  0.00           H
ATOM   3198  CD2 TRP A 499      49.690 -10.590  86.230  1.00  0.00           C
ATOM   3199  C   TRP A 499      52.250 -13.270  84.980  1.00  0.00           C
ATOM   3200  O   TRP A 499      51.590 -14.070  85.770  1.00  0.00           O
ATOM   3201  N   SER A 500      52.440 -13.640  83.720  1.00  0.00           N
ATOM   3202  H   SER A 500      52.880 -12.990  83.080  1.00  0.00           H
ATOM   3203  CA  SER A 500      51.970 -14.860  83.070  1.00  0.00           C
ATOM   3204  HA  SER A 500      50.900 -14.930  83.260  1.00  0.00           H
ATOM   3205  CB  SER A 500      52.010 -14.840  81.530  1.00  0.00           C
ATOM   3206  HB1 SER A 500      51.290 -14.180  81.050  1.00  0.00           H
ATOM   3207  HB2 SER A 500      51.810 -15.850  81.180  1.00  0.00           H
ATOM   3208  OG  SER A 500      53.230 -14.400  81.000  1.00  0.00           O
ATOM   3209  HG  SER A 500      53.220 -13.450  80.890  1.00  0.00           H
ATOM   3210  C   SER A 500      52.660 -16.110  83.620  1.00  0.00           C
ATOM   3211  O   SER A 500      52.040 -17.130  83.560  1.00  0.00           O
ATOM   3212  N   LEU A 501      53.780 -16.020  84.360  1.00  0.00           N
ATOM   3213  H   LEU A 501      54.330 -15.220  84.060  1.00  0.00           H
ATOM   3214  CA  LEU A 501      54.390 -17.050  85.240  1.00  0.00           C
ATOM   3215  HA  LEU A 501      54.430 -17.960  84.640  1.00  0.00           H
ATOM   3216  CB  LEU A 501      55.870 -16.940  85.510  1.00  0.00           C
ATOM   3217  HB1 LEU A 501      55.960 -16.040  86.130  1.00  0.00           H
ATOM   3218  HB2 LEU A 501      56.520 -16.830  84.650  1.00  0.00           H
ATOM   3219  CG  LEU A 501      56.440 -18.040  86.390  1.00  0.00           C
ATOM   3220  HG  LEU A 501      55.860 -18.010  87.310  1.00  0.00           H
ATOM   3221  CD1 LEU A 501      56.490 -19.450  85.820  1.00  0.00           C
ATOM   3222 1HD1 LEU A 501      56.810 -20.190  86.540  1.00  0.00           H
ATOM   3223 2HD1 LEU A 501      55.480 -19.750  85.570  1.00  0.00           H
ATOM   3224 3HD1 LEU A 501      57.140 -19.360  84.940  1.00  0.00           H
ATOM   3225  CD2 LEU A 501      57.850 -17.750  86.890  1.00  0.00           C
ATOM   3226 1HD2 LEU A 501      57.940 -16.730  87.270  1.00  0.00           H
ATOM   3227 2HD2 LEU A 501      58.120 -18.550  87.590  1.00  0.00           H
ATOM   3228 3HD2 LEU A 501      58.520 -17.810  86.030  1.00  0.00           H
ATOM   3229  C   LEU A 501      53.470 -17.330  86.500  1.00  0.00           C
ATOM   3230  O   LEU A 501      52.930 -18.430  86.630  1.00  0.00           O
ATOM   3231  N   GLY A 502      53.070 -16.190  87.130  1.00  0.00           N
ATOM   3232  H   GLY A 502      53.570 -15.360  86.840  1.00  0.00           H
ATOM   3233  CA  GLY A 502      51.940 -16.070  88.130  1.00  0.00           C
ATOM   3234  HA1 GLY A 502      51.580 -15.040  88.100  1.00  0.00           H
ATOM   3235  HA2 GLY A 502      52.300 -16.420  89.090  1.00  0.00           H
ATOM   3236  C   GLY A 502      50.680 -16.910  87.810  1.00  0.00           C
ATOM   3237  O   GLY A 502      50.270 -17.840  88.550  1.00  0.00           O
ATOM   3238  N   ILE A 503      50.120 -16.640  86.620  1.00  0.00           N
ATOM   3239  H   ILE A 503      50.520 -15.920  86.030  1.00  0.00           H
ATOM   3240  CA  ILE A 503      49.000 -17.480  86.020  1.00  0.00           C
ATOM   3241  HA  ILE A 503      48.160 -17.470  86.730  1.00  0.00           H
ATOM   3242  CB  ILE A 503      48.550 -16.720  84.750  1.00  0.00           C
ATOM   3243  HB  ILE A 503      49.400 -16.570  84.080  1.00  0.00           H
ATOM   3244  CG2 ILE A 503      47.460 -17.640  84.050  1.00  0.00           C
ATOM   3245 1HG2 ILE A 503      46.600 -17.770  84.700  1.00  0.00           H
ATOM   3246 2HG2 ILE A 503      47.080 -17.070  83.200  1.00  0.00           H
ATOM   3247 3HG2 ILE A 503      47.840 -18.580  83.660  1.00  0.00           H
ATOM   3248  CG1 ILE A 503      48.050 -15.300  85.070  1.00  0.00           C
ATOM   3249 1HG1 ILE A 503      47.680 -14.930  84.110  1.00  0.00           H
ATOM   3250 2HG1 ILE A 503      48.930 -14.730  85.380  1.00  0.00           H
ATOM   3251  CD  ILE A 503      47.000 -15.250  86.130  1.00  0.00           C
ATOM   3252  HD1 ILE A 503      47.450 -15.490  87.100  1.00  0.00           H
ATOM   3253  HD2 ILE A 503      46.500 -14.280  86.100  1.00  0.00           H
ATOM   3254  HD3 ILE A 503      46.260 -16.010  85.910  1.00  0.00           H
ATOM   3255  C   ILE A 503      49.340 -18.930  85.730  1.00  0.00           C
ATOM   3256  O   ILE A 503      48.550 -19.790  86.120  1.00  0.00           O
ATOM   3257  N   MET A 504      50.510 -19.210  85.060  1.00  0.00           N
ATOM   3258  H   MET A 504      51.130 -18.470  84.740  1.00  0.00           H
ATOM   3259  CA  MET A 504      50.880 -20.630  84.920  1.00  0.00           C
ATOM   3260  HA  MET A 504      50.250 -21.250  84.280  1.00  0.00           H
ATOM   3261  CB  MET A 504      52.320 -20.580  84.310  1.00  0.00           C
ATOM   3262  HB1 MET A 504      53.060 -20.240  85.030  1.00  0.00           H
ATOM   3263  HB2 MET A 504      52.330 -19.860  83.490  1.00  0.00           H
ATOM   3264  CG  MET A 504      52.940 -21.880  83.860  1.00  0.00           C
ATOM   3265  HG1 MET A 504      52.470 -22.210  82.930  1.00  0.00           H
ATOM   3266  HG2 MET A 504      52.760 -22.710  84.540  1.00  0.00           H
ATOM   3267  SD  MET A 504      54.700 -21.790  83.460  1.00  0.00           S
ATOM   3268  CE  MET A 504      54.520 -20.650  82.070  1.00  0.00           C
ATOM   3269  HE1 MET A 504      55.500 -20.610  81.590  1.00  0.00           H
ATOM   3270  HE2 MET A 504      53.850 -21.110  81.340  1.00  0.00           H
ATOM   3271  HE3 MET A 504      54.170 -19.690  82.440  1.00  0.00           H
ATOM   3272  C   MET A 504      50.930 -21.430  86.180  1.00  0.00           C
ATOM   3273  O   MET A 504      50.700 -22.650  86.220  1.00  0.00           O
ATOM   3274  N   VAL A 505      51.320 -20.820  87.330  1.00  0.00           N
ATOM   3275  H   VAL A 505      51.590 -19.850  87.220  1.00  0.00           H
ATOM   3276  CA  VAL A 505      51.430 -21.500  88.620  1.00  0.00           C
ATOM   3277  HA  VAL A 505      51.910 -22.430  88.320  1.00  0.00           H
ATOM   3278  CB  VAL A 505      52.420 -20.780  89.640  1.00  0.00           C
ATOM   3279  HB  VAL A 505      52.130 -19.750  89.880  1.00  0.00           H
ATOM   3280  CG1 VAL A 505      52.520 -21.620  90.950  1.00  0.00           C
ATOM   3281 1HG1 VAL A 505      52.870 -22.620  90.670  1.00  0.00           H
ATOM   3282 2HG1 VAL A 505      53.320 -21.160  91.520  1.00  0.00           H
ATOM   3283 3HG1 VAL A 505      51.560 -21.730  91.460  1.00  0.00           H
ATOM   3284  CG2 VAL A 505      53.880 -20.760  89.110  1.00  0.00           C
ATOM   3285 1HG2 VAL A 505      53.940 -20.250  88.140  1.00  0.00           H
ATOM   3286 2HG2 VAL A 505      54.410 -20.110  89.810  1.00  0.00           H
ATOM   3287 3HG2 VAL A 505      54.410 -21.710  89.150  1.00  0.00           H
ATOM   3288  C   VAL A 505      50.050 -21.820  89.250  1.00  0.00           C
ATOM   3289  O   VAL A 505      49.800 -22.930  89.760  1.00  0.00           O
ATOM   3290  N   ILE A 506      49.060 -20.880  89.160  1.00  0.00           N
ATOM   3291  H   ILE A 506      49.160 -19.990  88.680  1.00  0.00           H
ATOM   3292  CA  ILE A 506      47.640 -21.220  89.400  1.00  0.00           C
ATOM   3293  HA  ILE A 506      47.540 -21.420  90.470  1.00  0.00           H
ATOM   3294  CB  ILE A 506      46.770 -19.990  89.270  1.00  0.00           C
ATOM   3295  HB  ILE A 506      47.000 -19.510  88.320  1.00  0.00           H
ATOM   3296  CG2 ILE A 506      45.290 -20.460  89.280  1.00  0.00           C
ATOM   3297 1HG2 ILE A 506      44.640 -19.590  89.310  1.00  0.00           H
ATOM   3298 2HG2 ILE A 506      45.110 -21.050  88.380  1.00  0.00           H
ATOM   3299 3HG2 ILE A 506      45.110 -21.030  90.190  1.00  0.00           H
ATOM   3300  CG1 ILE A 506      47.020 -18.920  90.380  1.00  0.00           C
ATOM   3301 1HG1 ILE A 506      48.070 -18.670  90.270  1.00  0.00           H
ATOM   3302 2HG1 ILE A 506      46.860 -19.250  91.410  1.00  0.00           H
ATOM   3303  CD  ILE A 506      46.240 -17.590  90.230  1.00  0.00           C
ATOM   3304  HD1 ILE A 506      46.510 -16.940  91.050  1.00  0.00           H
ATOM   3305  HD2 ILE A 506      46.510 -17.040  89.330  1.00  0.00           H
ATOM   3306  HD3 ILE A 506      45.160 -17.740  90.150  1.00  0.00           H
ATOM   3307  C   ILE A 506      47.230 -22.420  88.590  1.00  0.00           C
ATOM   3308  O   ILE A 506      46.650 -23.350  89.120  1.00  0.00           O
ATOM   3309  N   GLU A 507      47.650 -22.530  87.310  1.00  0.00           N
ATOM   3310  H   GLU A 507      48.190 -21.780  86.930  1.00  0.00           H
ATOM   3311  CA  GLU A 507      47.340 -23.570  86.330  1.00  0.00           C
ATOM   3312  HA  GLU A 507      46.290 -23.840  86.430  1.00  0.00           H
ATOM   3313  CB  GLU A 507      47.540 -22.950  84.930  1.00  0.00           C
ATOM   3314  HB1 GLU A 507      48.610 -22.750  84.850  1.00  0.00           H
ATOM   3315  HB2 GLU A 507      47.000 -22.000  84.920  1.00  0.00           H
ATOM   3316  CG  GLU A 507      47.150 -23.720  83.610  1.00  0.00           C
ATOM   3317  HG1 GLU A 507      46.240 -24.240  83.900  1.00  0.00           H
ATOM   3318  HG2 GLU A 507      47.940 -24.480  83.610  1.00  0.00           H
ATOM   3319  CD  GLU A 507      47.110 -22.850  82.350  1.00  0.00           C
ATOM   3320  OE1 GLU A 507      46.300 -23.130  81.410  1.00  0.00           O
ATOM   3321  OE2 GLU A 507      48.040 -22.080  82.080  1.00  0.00           O
ATOM   3322  C   GLU A 507      48.180 -24.870  86.530  1.00  0.00           C
ATOM   3323  O   GLU A 507      47.770 -25.920  85.930  1.00  0.00           O
ATOM   3324  N   MET A 508      49.300 -24.880  87.280  1.00  0.00           N
ATOM   3325  H   MET A 508      49.650 -23.970  87.550  1.00  0.00           H
ATOM   3326  CA  MET A 508      49.890 -26.130  87.810  1.00  0.00           C
ATOM   3327  HA  MET A 508      49.780 -26.920  87.060  1.00  0.00           H
ATOM   3328  CB  MET A 508      51.330 -25.970  88.150  1.00  0.00           C
ATOM   3329  HB1 MET A 508      51.650 -26.830  88.740  1.00  0.00           H
ATOM   3330  HB2 MET A 508      51.570 -25.120  88.790  1.00  0.00           H
ATOM   3331  CG  MET A 508      52.150 -26.080  86.880  1.00  0.00           C
ATOM   3332  HG1 MET A 508      51.650 -25.420  86.170  1.00  0.00           H
ATOM   3333  HG2 MET A 508      52.080 -27.050  86.380  1.00  0.00           H
ATOM   3334  SD  MET A 508      53.890 -25.710  87.210  1.00  0.00           S
ATOM   3335  CE  MET A 508      53.880 -23.910  87.170  1.00  0.00           C
ATOM   3336  HE1 MET A 508      53.410 -23.640  88.120  1.00  0.00           H
ATOM   3337  HE2 MET A 508      54.840 -23.430  87.000  1.00  0.00           H
ATOM   3338  HE3 MET A 508      53.350 -23.680  86.250  1.00  0.00           H
ATOM   3339  C   MET A 508      49.070 -26.630  89.010  1.00  0.00           C
ATOM   3340  O   MET A 508      48.800 -27.810  89.110  1.00  0.00           O
ATOM   3341  N   VAL A 509      48.780 -25.730  89.950  1.00  0.00           N
ATOM   3342  H   VAL A 509      48.990 -24.760  89.780  1.00  0.00           H
ATOM   3343  CA  VAL A 509      48.320 -26.190  91.260  1.00  0.00           C
ATOM   3344  HA  VAL A 509      48.910 -27.030  91.630  1.00  0.00           H
ATOM   3345  CB  VAL A 509      48.440 -24.970  92.240  1.00  0.00           C
ATOM   3346  HB  VAL A 509      48.040 -24.050  91.810  1.00  0.00           H
ATOM   3347  CG1 VAL A 509      47.890 -25.320  93.570  1.00  0.00           C
ATOM   3348 1HG1 VAL A 509      46.810 -25.430  93.570  1.00  0.00           H
ATOM   3349 2HG1 VAL A 509      48.280 -26.260  93.960  1.00  0.00           H
ATOM   3350 3HG1 VAL A 509      48.010 -24.580  94.360  1.00  0.00           H
ATOM   3351  CG2 VAL A 509      49.860 -24.580  92.600  1.00  0.00           C
ATOM   3352 1HG2 VAL A 509      50.480 -25.410  92.920  1.00  0.00           H
ATOM   3353 2HG2 VAL A 509      50.340 -24.100  91.740  1.00  0.00           H
ATOM   3354 3HG2 VAL A 509      49.860 -23.810  93.380  1.00  0.00           H
ATOM   3355  C   VAL A 509      46.790 -26.590  91.230  1.00  0.00           C
ATOM   3356  O   VAL A 509      46.420 -27.750  91.440  1.00  0.00           O
ATOM   3357  N   ASP A 510      45.950 -25.690  90.800  1.00  0.00           N
ATOM   3358  H   ASP A 510      46.400 -24.870  90.410  1.00  0.00           H
ATOM   3359  CA  ASP A 510      44.460 -25.880  90.610  1.00  0.00           C
ATOM   3360  HA  ASP A 510      44.050 -26.480  91.430  1.00  0.00           H
ATOM   3361  CB  ASP A 510      43.720 -24.480  90.650  1.00  0.00           C
ATOM   3362  HB1 ASP A 510      42.680 -24.660  90.370  1.00  0.00           H
ATOM   3363  HB2 ASP A 510      44.000 -23.800  89.850  1.00  0.00           H
ATOM   3364  CG  ASP A 510      43.780 -23.770  92.030  1.00  0.00           C
ATOM   3365  OD1 ASP A 510      44.050 -24.350  93.110  1.00  0.00           O
ATOM   3366  OD2 ASP A 510      43.530 -22.560  92.080  1.00  0.00           O
ATOM   3367  C   ASP A 510      44.160 -26.600  89.320  1.00  0.00           C
ATOM   3368  O   ASP A 510      43.040 -26.940  89.100  1.00  0.00           O
ATOM   3369  N   GLY A 511      45.110 -26.660  88.330  1.00  0.00           N
ATOM   3370  H   GLY A 511      45.970 -26.170  88.540  1.00  0.00           H
ATOM   3371  CA  GLY A 511      45.020 -27.450  87.080  1.00  0.00           C
ATOM   3372  HA1 GLY A 511      44.320 -28.260  87.230  1.00  0.00           H
ATOM   3373  HA2 GLY A 511      46.010 -27.800  86.790  1.00  0.00           H
ATOM   3374  C   GLY A 511      44.470 -26.630  85.900  1.00  0.00           C
ATOM   3375  O   GLY A 511      44.340 -27.180  84.790  1.00  0.00           O
ATOM   3376  N   GLU A 512      44.090 -25.380  86.160  1.00  0.00           N
ATOM   3377  H   GLU A 512      44.200 -25.050  87.110  1.00  0.00           H
ATOM   3378  CA  GLU A 512      43.440 -24.440  85.180  1.00  0.00           C
ATOM   3379  HA  GLU A 512      43.930 -24.620  84.230  1.00  0.00           H
ATOM   3380  CB  GLU A 512      41.910 -24.790  85.090  1.00  0.00           C
ATOM   3381  HB1 GLU A 512      41.710 -25.790  84.710  1.00  0.00           H
ATOM   3382  HB2 GLU A 512      41.490 -24.020  84.450  1.00  0.00           H
ATOM   3383  CG  GLU A 512      41.240 -24.710  86.440  1.00  0.00           C
ATOM   3384  HG1 GLU A 512      41.230 -23.720  86.880  1.00  0.00           H
ATOM   3385  HG2 GLU A 512      41.730 -25.380  87.150  1.00  0.00           H
ATOM   3386  CD  GLU A 512      39.760 -25.010  86.470  1.00  0.00           C
ATOM   3387  OE1 GLU A 512      39.400 -26.170  86.790  1.00  0.00           O
ATOM   3388  OE2 GLU A 512      38.930 -24.060  86.320  1.00  0.00           O
ATOM   3389  C   GLU A 512      43.720 -22.960  85.600  1.00  0.00           C
ATOM   3390  O   GLU A 512      43.820 -22.590  86.780  1.00  0.00           O
ATOM   3391  N   PRO A 513      43.700 -21.950  84.680  1.00  0.00           N
ATOM   3392  CD  PRO A 513      43.580 -22.130  83.270  1.00  0.00           C
ATOM   3393  HD1 PRO A 513      42.550 -22.160  82.910  1.00  0.00           H
ATOM   3394  HD2 PRO A 513      44.080 -23.020  82.870  1.00  0.00           H
ATOM   3395  CG  PRO A 513      44.230 -20.870  82.710  1.00  0.00           C
ATOM   3396  HG1 PRO A 513      43.940 -20.670  81.670  1.00  0.00           H
ATOM   3397  HG2 PRO A 513      45.310 -20.910  82.830  1.00  0.00           H
ATOM   3398  CB  PRO A 513      43.720 -19.770  83.640  1.00  0.00           C
ATOM   3399  HB1 PRO A 513      42.680 -19.480  83.470  1.00  0.00           H
ATOM   3400  HB2 PRO A 513      44.400 -18.910  83.580  1.00  0.00           H
ATOM   3401  CA  PRO A 513      43.820 -20.490  85.010  1.00  0.00           C
ATOM   3402  HA  PRO A 513      44.790 -20.350  85.490  1.00  0.00           H
ATOM   3403  C   PRO A 513      42.680 -19.910  85.930  1.00  0.00           C
ATOM   3404  O   PRO A 513      41.590 -20.510  85.990  1.00  0.00           O
ATOM   3405  N   PRO A 514      42.860 -18.720  86.550  1.00  0.00           N
ATOM   3406  CD  PRO A 514      44.060 -17.820  86.510  1.00  0.00           C
ATOM   3407  HD1 PRO A 514      44.350 -17.540  85.500  1.00  0.00           H
ATOM   3408  HD2 PRO A 514      44.850 -18.310  87.080  1.00  0.00           H
ATOM   3409  CG  PRO A 514      43.640 -16.520  87.100  1.00  0.00           C
ATOM   3410  HG1 PRO A 514      43.250 -15.890  86.300  1.00  0.00           H
ATOM   3411  HG2 PRO A 514      44.480 -16.120  87.650  1.00  0.00           H
ATOM   3412  CB  PRO A 514      42.600 -16.930  88.070  1.00  0.00           C
ATOM   3413  HB1 PRO A 514      41.930 -16.080  88.240  1.00  0.00           H
ATOM   3414  HB2 PRO A 514      43.020 -17.340  88.990  1.00  0.00           H
ATOM   3415  CA  PRO A 514      41.890 -18.070  87.360  1.00  0.00           C
ATOM   3416  HA  PRO A 514      41.570 -18.750  88.150  1.00  0.00           H
ATOM   3417  C   PRO A 514      40.680 -17.640  86.490  1.00  0.00           C
ATOM   3418  O   PRO A 514      40.890 -17.290  85.300  1.00  0.00           O
ATOM   3419  N   TYR A 515      39.490 -17.550  87.120  1.00  0.00           N
ATOM   3420  H   TYR A 515      39.370 -17.940  88.040  1.00  0.00           H
ATOM   3421  CA  TYR A 515      38.210 -17.050  86.590  1.00  0.00           C
ATOM   3422  HA  TYR A 515      37.490 -17.370  87.340  1.00  0.00           H
ATOM   3423  CB  TYR A 515      38.220 -15.510  86.390  1.00  0.00           C
ATOM   3424  HB1 TYR A 515      37.160 -15.260  86.270  1.00  0.00           H
ATOM   3425  HB2 TYR A 515      38.750 -15.170  85.510  1.00  0.00           H
ATOM   3426  CG  TYR A 515      38.580 -14.760  87.710  1.00  0.00           C
ATOM   3427  CD1 TYR A 515      37.780 -14.730  88.900  1.00  0.00           C
ATOM   3428  HD1 TYR A 515      36.920 -15.380  88.990  1.00  0.00           H
ATOM   3429  CE1 TYR A 515      38.220 -14.040  90.050  1.00  0.00           C
ATOM   3430  HE1 TYR A 515      37.720 -13.970  91.000  1.00  0.00           H
ATOM   3431  CZ  TYR A 515      39.380 -13.300  90.020  1.00  0.00           C
ATOM   3432  OH  TYR A 515      39.740 -12.730  91.210  1.00  0.00           O
ATOM   3433  HH  TYR A 515      40.540 -12.220  91.080  1.00  0.00           H
ATOM   3434  CE2 TYR A 515      40.210 -13.220  88.850  1.00  0.00           C
ATOM   3435  HE2 TYR A 515      41.120 -12.640  88.790  1.00  0.00           H
ATOM   3436  CD2 TYR A 515      39.790 -14.060  87.730  1.00  0.00           C
ATOM   3437  HD2 TYR A 515      40.350 -14.010  86.810  1.00  0.00           H
ATOM   3438  C   TYR A 515      37.690 -17.840  85.370  1.00  0.00           C
ATOM   3439  O   TYR A 515      36.720 -17.430  84.730  1.00  0.00           O
ATOM   3440  N   PHE A 516      38.350 -18.900  85.000  1.00  0.00           N
ATOM   3441  H   PHE A 516      39.050 -19.050  85.710  1.00  0.00           H
ATOM   3442  CA  PHE A 516      38.270 -19.590  83.720  1.00  0.00           C
ATOM   3443  HA  PHE A 516      38.420 -18.820  82.960  1.00  0.00           H
ATOM   3444  CB  PHE A 516      39.470 -20.530  83.580  1.00  0.00           C
ATOM   3445  HB1 PHE A 516      39.380 -21.220  84.430  1.00  0.00           H
ATOM   3446  HB2 PHE A 516      40.380 -19.930  83.550  1.00  0.00           H
ATOM   3447  CG  PHE A 516      39.440 -21.350  82.330  1.00  0.00           C
ATOM   3448  CD1 PHE A 516      39.900 -20.820  81.140  1.00  0.00           C
ATOM   3449  HD1 PHE A 516      40.310 -19.820  81.080  1.00  0.00           H
ATOM   3450  CE1 PHE A 516      39.850 -21.600  79.960  1.00  0.00           C
ATOM   3451  HE1 PHE A 516      40.110 -21.090  79.050  1.00  0.00           H
ATOM   3452  CZ  PHE A 516      39.230 -22.870  79.990  1.00  0.00           C
ATOM   3453  HZ  PHE A 516      39.020 -23.370  79.060  1.00  0.00           H
ATOM   3454  CE2 PHE A 516      38.780 -23.400  81.220  1.00  0.00           C
ATOM   3455  HE2 PHE A 516      38.260 -24.340  81.240  1.00  0.00           H
ATOM   3456  CD2 PHE A 516      38.910 -22.660  82.390  1.00  0.00           C
ATOM   3457  HD2 PHE A 516      38.500 -23.030  83.320  1.00  0.00           H
ATOM   3458  C   PHE A 516      36.820 -20.190  83.390  1.00  0.00           C
ATOM   3459  O   PHE A 516      36.420 -20.400  82.260  1.00  0.00           O
ATOM   3460  N   ASN A 517      36.040 -20.430  84.420  1.00  0.00           N
ATOM   3461  H   ASN A 517      36.380 -20.270  85.360  1.00  0.00           H
ATOM   3462  CA  ASN A 517      34.580 -20.680  84.360  1.00  0.00           C
ATOM   3463  HA  ASN A 517      34.460 -21.560  83.720  1.00  0.00           H
ATOM   3464  CB  ASN A 517      34.060 -21.190  85.710  1.00  0.00           C
ATOM   3465  HB1 ASN A 517      33.040 -21.580  85.610  1.00  0.00           H
ATOM   3466  HB2 ASN A 517      34.100 -20.420  86.480  1.00  0.00           H
ATOM   3467  CG  ASN A 517      34.750 -22.470  86.090  1.00  0.00           C
ATOM   3468  OD1 ASN A 517      34.710 -23.530  85.440  1.00  0.00           O
ATOM   3469  ND2 ASN A 517      35.590 -22.440  87.130  1.00  0.00           N
ATOM   3470 1HD2 ASN A 517      35.610 -21.610  87.690  1.00  0.00           H
ATOM   3471 2HD2 ASN A 517      36.160 -23.220  87.420  1.00  0.00           H
ATOM   3472  C   ASN A 517      33.670 -19.540  83.850  1.00  0.00           C
ATOM   3473  O   ASN A 517      32.470 -19.820  83.650  1.00  0.00           O
ATOM   3474  N   GLU A 518      34.250 -18.290  83.780  1.00  0.00           N
ATOM   3475  H   GLU A 518      35.240 -18.100  83.770  1.00  0.00           H
ATOM   3476  CA  GLU A 518      33.530 -17.040  83.520  1.00  0.00           C
ATOM   3477  HA  GLU A 518      32.450 -17.160  83.500  1.00  0.00           H
ATOM   3478  CB  GLU A 518      33.990 -15.980  84.570  1.00  0.00           C
ATOM   3479  HB1 GLU A 518      33.390 -15.090  84.400  1.00  0.00           H
ATOM   3480  HB2 GLU A 518      34.980 -15.690  84.220  1.00  0.00           H
ATOM   3481  CG  GLU A 518      33.960 -16.270  86.090  1.00  0.00           C
ATOM   3482  HG1 GLU A 518      34.160 -15.340  86.620  1.00  0.00           H
ATOM   3483  HG2 GLU A 518      34.760 -16.970  86.340  1.00  0.00           H
ATOM   3484  CD  GLU A 518      32.520 -16.740  86.500  1.00  0.00           C
ATOM   3485  OE1 GLU A 518      31.550 -16.010  86.160  1.00  0.00           O
ATOM   3486  OE2 GLU A 518      32.340 -17.750  87.200  1.00  0.00           O
ATOM   3487  C   GLU A 518      34.020 -16.580  82.130  1.00  0.00           C
ATOM   3488  O   GLU A 518      35.210 -16.790  81.760  1.00  0.00           O
ATOM   3489  N   PRO A 519      33.210 -15.960  81.290  1.00  0.00           N
ATOM   3490  CD  PRO A 519      31.820 -15.580  81.580  1.00  0.00           C
ATOM   3491  HD1 PRO A 519      31.610 -15.080  82.530  1.00  0.00           H
ATOM   3492  HD2 PRO A 519      31.280 -16.530  81.550  1.00  0.00           H
ATOM   3493  CG  PRO A 519      31.390 -14.700  80.450  1.00  0.00           C
ATOM   3494  HG1 PRO A 519      31.560 -13.670  80.760  1.00  0.00           H
ATOM   3495  HG2 PRO A 519      30.340 -14.620  80.190  1.00  0.00           H
ATOM   3496  CB  PRO A 519      32.270 -14.990  79.230  1.00  0.00           C
ATOM   3497  HB1 PRO A 519      32.420 -14.060  78.680  1.00  0.00           H
ATOM   3498  HB2 PRO A 519      31.850 -15.770  78.590  1.00  0.00           H
ATOM   3499  CA  PRO A 519      33.550 -15.470  79.880  1.00  0.00           C
ATOM   3500  HA  PRO A 519      33.780 -16.370  79.320  1.00  0.00           H
ATOM   3501  C   PRO A 519      34.710 -14.440  79.850  1.00  0.00           C
ATOM   3502  O   PRO A 519      35.000 -13.670  80.810  1.00  0.00           O
ATOM   3503  N   PRO A 520      35.340 -14.310  78.720  1.00  0.00           N
ATOM   3504  CD  PRO A 520      35.040 -15.010  77.450  1.00  0.00           C
ATOM   3505  HD1 PRO A 520      33.970 -15.070  77.280  1.00  0.00           H
ATOM   3506  HD2 PRO A 520      35.500 -16.000  77.360  1.00  0.00           H
ATOM   3507  CG  PRO A 520      35.690 -14.250  76.340  1.00  0.00           C
ATOM   3508  HG1 PRO A 520      35.130 -13.400  75.950  1.00  0.00           H
ATOM   3509  HG2 PRO A 520      35.880 -14.990  75.570  1.00  0.00           H
ATOM   3510  CB  PRO A 520      36.970 -13.750  77.010  1.00  0.00           C
ATOM   3511  HB1 PRO A 520      37.440 -12.960  76.420  1.00  0.00           H
ATOM   3512  HB2 PRO A 520      37.700 -14.560  77.040  1.00  0.00           H
ATOM   3513  CA  PRO A 520      36.540 -13.520  78.500  1.00  0.00           C
ATOM   3514  HA  PRO A 520      37.330 -14.040  79.030  1.00  0.00           H
ATOM   3515  C   PRO A 520      36.520 -12.030  78.870  1.00  0.00           C
ATOM   3516  O   PRO A 520      37.430 -11.570  79.580  1.00  0.00           O
ATOM   3517  N   LEU A 521      35.420 -11.270  78.680  1.00  0.00           N
ATOM   3518  H   LEU A 521      34.690 -11.610  78.070  1.00  0.00           H
ATOM   3519  CA  LEU A 521      35.380  -9.820  79.180  1.00  0.00           C
ATOM   3520  HA  LEU A 521      36.290  -9.240  79.050  1.00  0.00           H
ATOM   3521  CB  LEU A 521      34.210  -9.170  78.360  1.00  0.00           C
ATOM   3522  HB1 LEU A 521      33.250  -9.640  78.600  1.00  0.00           H
ATOM   3523  HB2 LEU A 521      34.410  -9.290  77.290  1.00  0.00           H
ATOM   3524  CG  LEU A 521      34.080  -7.640  78.610  1.00  0.00           C
ATOM   3525  HG  LEU A 521      33.720  -7.390  79.600  1.00  0.00           H
ATOM   3526  CD1 LEU A 521      35.380  -6.900  78.320  1.00  0.00           C
ATOM   3527 1HD1 LEU A 521      36.110  -7.180  79.080  1.00  0.00           H
ATOM   3528 2HD1 LEU A 521      35.810  -7.190  77.360  1.00  0.00           H
ATOM   3529 3HD1 LEU A 521      35.180  -5.840  78.420  1.00  0.00           H
ATOM   3530  CD2 LEU A 521      33.010  -7.110  77.580  1.00  0.00           C
ATOM   3531 1HD2 LEU A 521      32.110  -7.700  77.690  1.00  0.00           H
ATOM   3532 2HD2 LEU A 521      32.750  -6.080  77.810  1.00  0.00           H
ATOM   3533 3HD2 LEU A 521      33.230  -7.240  76.520  1.00  0.00           H
ATOM   3534  C   LEU A 521      35.120  -9.750  80.730  1.00  0.00           C
ATOM   3535  O   LEU A 521      35.800  -9.010  81.450  1.00  0.00           O
ATOM   3536  N   LYS A 522      34.300 -10.630  81.230  1.00  0.00           N
ATOM   3537  H   LYS A 522      33.710 -11.160  80.620  1.00  0.00           H
ATOM   3538  CA  LYS A 522      34.110 -10.880  82.720  1.00  0.00           C
ATOM   3539  HA  LYS A 522      33.790  -9.920  83.120  1.00  0.00           H
ATOM   3540  CB  LYS A 522      33.030 -11.930  83.050  1.00  0.00           C
ATOM   3541  HB1 LYS A 522      33.330 -12.930  82.720  1.00  0.00           H
ATOM   3542  HB2 LYS A 522      32.050 -11.700  82.640  1.00  0.00           H
ATOM   3543  CG  LYS A 522      32.780 -12.040  84.580  1.00  0.00           C
ATOM   3544  HG1 LYS A 522      32.720 -10.980  84.850  1.00  0.00           H
ATOM   3545  HG2 LYS A 522      33.740 -12.420  84.930  1.00  0.00           H
ATOM   3546  CD  LYS A 522      31.590 -12.920  85.010  1.00  0.00           C
ATOM   3547  HD1 LYS A 522      31.580 -13.910  84.560  1.00  0.00           H
ATOM   3548  HD2 LYS A 522      30.610 -12.420  84.980  1.00  0.00           H
ATOM   3549  CE  LYS A 522      31.790 -12.940  86.500  1.00  0.00           C
ATOM   3550  HE1 LYS A 522      31.730 -11.910  86.860  1.00  0.00           H
ATOM   3551  HE2 LYS A 522      32.800 -13.290  86.720  1.00  0.00           H
ATOM   3552  NZ  LYS A 522      30.840 -13.770  87.270  1.00  0.00           N
ATOM   3553  HZ1 LYS A 522      31.150 -13.770  88.230  1.00  0.00           H
ATOM   3554  HZ2 LYS A 522      29.900 -13.410  87.160  1.00  0.00           H
ATOM   3555  HZ3 LYS A 522      30.810 -14.740  86.990  1.00  0.00           H
ATOM   3556  C   LYS A 522      35.470 -11.080  83.460  1.00  0.00           C
ATOM   3557  O   LYS A 522      35.660 -10.360  84.390  1.00  0.00           O
ATOM   3558  N   ALA A 523      36.300 -11.980  82.960  1.00  0.00           N
ATOM   3559  H   ALA A 523      36.060 -12.310  82.030  1.00  0.00           H
ATOM   3560  CA  ALA A 523      37.650 -12.160  83.420  1.00  0.00           C
ATOM   3561  HA  ALA A 523      37.700 -12.580  84.430  1.00  0.00           H
ATOM   3562  CB  ALA A 523      38.290 -13.170  82.550  1.00  0.00           C
ATOM   3563  HB1 ALA A 523      39.230 -13.360  83.060  1.00  0.00           H
ATOM   3564  HB2 ALA A 523      37.640 -14.050  82.430  1.00  0.00           H
ATOM   3565  HB3 ALA A 523      38.480 -12.800  81.540  1.00  0.00           H
ATOM   3566  C   ALA A 523      38.440 -10.850  83.390  1.00  0.00           C
ATOM   3567  O   ALA A 523      39.060 -10.610  84.430  1.00  0.00           O
ATOM   3568  N   MET A 524      38.360 -10.060  82.320  1.00  0.00           N
ATOM   3569  H   MET A 524      37.790 -10.300  81.520  1.00  0.00           H
ATOM   3570  CA  MET A 524      39.190  -8.860  82.280  1.00  0.00           C
ATOM   3571  HA  MET A 524      40.200  -9.230  82.470  1.00  0.00           H
ATOM   3572  CB  MET A 524      39.150  -8.180  80.900  1.00  0.00           C
ATOM   3573  HB1 MET A 524      39.770  -7.300  81.020  1.00  0.00           H
ATOM   3574  HB2 MET A 524      38.120  -7.980  80.600  1.00  0.00           H
ATOM   3575  CG  MET A 524      39.800  -9.130  79.900  1.00  0.00           C
ATOM   3576  HG1 MET A 524      39.120  -9.960  79.710  1.00  0.00           H
ATOM   3577  HG2 MET A 524      40.680  -9.650  80.290  1.00  0.00           H
ATOM   3578  SD  MET A 524      40.360  -8.350  78.370  1.00  0.00           S
ATOM   3579  CE  MET A 524      38.740  -8.020  77.630  1.00  0.00           C
ATOM   3580  HE1 MET A 524      38.120  -8.920  77.620  1.00  0.00           H
ATOM   3581  HE2 MET A 524      38.270  -7.290  78.290  1.00  0.00           H
ATOM   3582  HE3 MET A 524      38.800  -7.690  76.590  1.00  0.00           H
ATOM   3583  C   MET A 524      38.830  -7.840  83.310  1.00  0.00           C
ATOM   3584  O   MET A 524      39.640  -7.110  83.850  1.00  0.00           O
ATOM   3585  N   LYS A 525      37.560  -7.770  83.700  1.00  0.00           N
ATOM   3586  H   LYS A 525      36.860  -8.230  83.130  1.00  0.00           H
ATOM   3587  CA  LYS A 525      37.060  -7.030  84.820  1.00  0.00           C
ATOM   3588  HA  LYS A 525      37.500  -6.030  84.810  1.00  0.00           H
ATOM   3589  CB  LYS A 525      35.530  -6.890  84.770  1.00  0.00           C
ATOM   3590  HB1 LYS A 525      35.100  -6.400  85.650  1.00  0.00           H
ATOM   3591  HB2 LYS A 525      35.160  -7.910  84.840  1.00  0.00           H
ATOM   3592  CG  LYS A 525      34.990  -6.150  83.520  1.00  0.00           C
ATOM   3593  HG1 LYS A 525      35.460  -6.590  82.640  1.00  0.00           H
ATOM   3594  HG2 LYS A 525      35.420  -5.140  83.530  1.00  0.00           H
ATOM   3595  CD  LYS A 525      33.440  -6.210  83.330  1.00  0.00           C
ATOM   3596  HD1 LYS A 525      32.970  -5.640  84.130  1.00  0.00           H
ATOM   3597  HD2 LYS A 525      33.110  -7.250  83.440  1.00  0.00           H
ATOM   3598  CE  LYS A 525      33.070  -5.810  81.930  1.00  0.00           C
ATOM   3599  HE1 LYS A 525      31.990  -5.910  81.860  1.00  0.00           H
ATOM   3600  HE2 LYS A 525      33.520  -6.540  81.260  1.00  0.00           H
ATOM   3601  NZ  LYS A 525      33.550  -4.480  81.680  1.00  0.00           N
ATOM   3602  HZ1 LYS A 525      34.520  -4.290  81.840  1.00  0.00           H
ATOM   3603  HZ2 LYS A 525      33.200  -4.010  80.850  1.00  0.00           H
ATOM   3604  HZ3 LYS A 525      33.050  -3.830  82.270  1.00  0.00           H
ATOM   3605  C   LYS A 525      37.590  -7.600  86.060  1.00  0.00           C
ATOM   3606  O   LYS A 525      38.140  -6.940  86.900  1.00  0.00           O
ATOM   3607  N   MET A 526      37.530  -8.950  86.210  1.00  0.00           N
ATOM   3608  H   MET A 526      37.230  -9.530  85.450  1.00  0.00           H
ATOM   3609  CA  MET A 526      37.870  -9.520  87.510  1.00  0.00           C
ATOM   3610  HA  MET A 526      37.520  -8.910  88.350  1.00  0.00           H
ATOM   3611  CB  MET A 526      37.180 -10.980  87.690  1.00  0.00           C
ATOM   3612  HB1 MET A 526      37.490 -11.430  88.630  1.00  0.00           H
ATOM   3613  HB2 MET A 526      37.530 -11.660  86.920  1.00  0.00           H
ATOM   3614  CG  MET A 526      35.660 -10.930  87.630  1.00  0.00           C
ATOM   3615  HG1 MET A 526      35.440 -10.440  86.690  1.00  0.00           H
ATOM   3616  HG2 MET A 526      35.280 -10.420  88.520  1.00  0.00           H
ATOM   3617  SD  MET A 526      35.040 -12.570  87.590  1.00  0.00           S
ATOM   3618  CE  MET A 526      34.580 -12.930  89.340  1.00  0.00           C
ATOM   3619  HE1 MET A 526      33.900 -12.190  89.740  1.00  0.00           H
ATOM   3620  HE2 MET A 526      34.150 -13.930  89.330  1.00  0.00           H
ATOM   3621  HE3 MET A 526      35.470 -12.920  89.980  1.00  0.00           H
ATOM   3622  C   MET A 526      39.350  -9.640  87.790  1.00  0.00           C
ATOM   3623  O   MET A 526      39.840  -9.900  88.920  1.00  0.00           O
ATOM   3624  N   ILE A 527      40.220  -9.430  86.780  1.00  0.00           N
ATOM   3625  H   ILE A 527      39.810  -9.540  85.860  1.00  0.00           H
ATOM   3626  CA  ILE A 527      41.660  -9.270  86.860  1.00  0.00           C
ATOM   3627  HA  ILE A 527      41.960  -9.720  87.810  1.00  0.00           H
ATOM   3628  CB  ILE A 527      42.250 -10.070  85.740  1.00  0.00           C
ATOM   3629  HB  ILE A 527      41.780  -9.710  84.820  1.00  0.00           H
ATOM   3630  CG2 ILE A 527      43.720  -9.870  85.500  1.00  0.00           C
ATOM   3631 1HG2 ILE A 527      43.990  -8.830  85.280  1.00  0.00           H
ATOM   3632 2HG2 ILE A 527      44.360 -10.110  86.350  1.00  0.00           H
ATOM   3633 3HG2 ILE A 527      44.030 -10.400  84.600  1.00  0.00           H
ATOM   3634  CG1 ILE A 527      42.030 -11.550  85.970  1.00  0.00           C
ATOM   3635 1HG1 ILE A 527      40.990 -11.650  86.300  1.00  0.00           H
ATOM   3636 2HG1 ILE A 527      42.720 -11.860  86.760  1.00  0.00           H
ATOM   3637  CD  ILE A 527      42.190 -12.510  84.780  1.00  0.00           C
ATOM   3638  HD1 ILE A 527      41.660 -12.000  83.970  1.00  0.00           H
ATOM   3639  HD2 ILE A 527      43.230 -12.530  84.440  1.00  0.00           H
ATOM   3640  HD3 ILE A 527      41.690 -13.460  84.990  1.00  0.00           H
ATOM   3641  C   ILE A 527      42.240  -7.860  86.890  1.00  0.00           C
ATOM   3642  O   ILE A 527      43.160  -7.650  87.670  1.00  0.00           O
ATOM   3643  N   ARG A 528      41.730  -6.870  86.190  1.00  0.00           N
ATOM   3644  H   ARG A 528      40.860  -7.030  85.690  1.00  0.00           H
ATOM   3645  CA  ARG A 528      42.170  -5.450  86.290  1.00  0.00           C
ATOM   3646  HA  ARG A 528      43.210  -5.640  86.580  1.00  0.00           H
ATOM   3647  CB  ARG A 528      42.070  -4.830  84.880  1.00  0.00           C
ATOM   3648  HB1 ARG A 528      41.060  -4.540  84.580  1.00  0.00           H
ATOM   3649  HB2 ARG A 528      42.510  -5.470  84.110  1.00  0.00           H
ATOM   3650  CG  ARG A 528      42.970  -3.480  84.690  1.00  0.00           C
ATOM   3651  HG1 ARG A 528      43.110  -3.300  83.630  1.00  0.00           H
ATOM   3652  HG2 ARG A 528      43.950  -3.540  85.180  1.00  0.00           H
ATOM   3653  CD  ARG A 528      42.400  -2.260  85.310  1.00  0.00           C
ATOM   3654  HD1 ARG A 528      42.970  -1.340  85.180  1.00  0.00           H
ATOM   3655  HD2 ARG A 528      42.360  -2.470  86.380  1.00  0.00           H
ATOM   3656  NE  ARG A 528      41.000  -2.070  84.860  1.00  0.00           N
ATOM   3657  HE  ARG A 528      40.200  -2.550  85.240  1.00  0.00           H
ATOM   3658  CZ  ARG A 528      40.620  -1.270  83.940  1.00  0.00           C
ATOM   3659  NH1 ARG A 528      41.560  -0.690  83.150  1.00  0.00           N
ATOM   3660 1HH1 ARG A 528      42.510  -0.690  83.480  1.00  0.00           H
ATOM   3661 2HH1 ARG A 528      41.180  -0.030  82.490  1.00  0.00           H
ATOM   3662  NH2 ARG A 528      39.320  -1.010  83.700  1.00  0.00           N
ATOM   3663 1HH2 ARG A 528      38.560  -1.270  84.310  1.00  0.00           H
ATOM   3664 2HH2 ARG A 528      39.120  -0.600  82.800  1.00  0.00           H
ATOM   3665  C   ARG A 528      41.500  -4.640  87.370  1.00  0.00           C
ATOM   3666  O   ARG A 528      42.190  -3.940  88.140  1.00  0.00           O
ATOM   3667  N   ASP A 529      40.190  -4.570  87.340  1.00  0.00           N
ATOM   3668  H   ASP A 529      39.770  -5.100  86.580  1.00  0.00           H
ATOM   3669  CA  ASP A 529      39.330  -3.850  88.220  1.00  0.00           C
ATOM   3670  HA  ASP A 529      39.850  -2.900  88.370  1.00  0.00           H
ATOM   3671  CB  ASP A 529      37.940  -3.570  87.590  1.00  0.00           C
ATOM   3672  HB1 ASP A 529      37.420  -2.920  88.290  1.00  0.00           H
ATOM   3673  HB2 ASP A 529      37.400  -4.500  87.460  1.00  0.00           H
ATOM   3674  CG  ASP A 529      38.080  -2.950  86.190  1.00  0.00           C
ATOM   3675  OD1 ASP A 529      37.850  -1.720  86.170  1.00  0.00           O
ATOM   3676  OD2 ASP A 529      38.480  -3.570  85.200  1.00  0.00           O
ATOM   3677  C   ASP A 529      39.160  -4.520  89.590  1.00  0.00           C
ATOM   3678  O   ASP A 529      38.110  -4.430  90.260  1.00  0.00           O
ATOM   3679  N   ASN A 530      40.220  -5.230  90.030  1.00  0.00           N
ATOM   3680  H   ASN A 530      41.060  -5.070  89.500  1.00  0.00           H
ATOM   3681  CA  ASN A 530      40.270  -5.940  91.280  1.00  0.00           C
ATOM   3682  HA  ASN A 530      39.670  -5.490  92.070  1.00  0.00           H
ATOM   3683  CB  ASN A 530      39.810  -7.400  91.000  1.00  0.00           C
ATOM   3684  HB1 ASN A 530      40.640  -7.960  90.560  1.00  0.00           H
ATOM   3685  HB2 ASN A 530      39.010  -7.460  90.260  1.00  0.00           H
ATOM   3686  CG  ASN A 530      39.270  -8.230  92.150  1.00  0.00           C
ATOM   3687  OD1 ASN A 530      39.210  -7.760  93.300  1.00  0.00           O
ATOM   3688  ND2 ASN A 530      39.170  -9.510  92.100  1.00  0.00           N
ATOM   3689 1HD2 ASN A 530      39.590 -10.020  91.330  1.00  0.00           H
ATOM   3690 2HD2 ASN A 530      38.740  -9.990  92.880  1.00  0.00           H
ATOM   3691  C   ASN A 530      41.700  -6.000  91.820  1.00  0.00           C
ATOM   3692  O   ASN A 530      42.670  -5.650  91.140  1.00  0.00           O
ATOM   3693  N   LEU A 531      41.830  -6.690  92.980  1.00  0.00           N
ATOM   3694  H   LEU A 531      41.000  -6.840  93.530  1.00  0.00           H
ATOM   3695  CA  LEU A 531      43.090  -7.330  93.450  1.00  0.00           C
ATOM   3696  HA  LEU A 531      43.860  -6.560  93.470  1.00  0.00           H
ATOM   3697  CB  LEU A 531      42.860  -7.780  94.890  1.00  0.00           C
ATOM   3698  HB1 LEU A 531      43.690  -8.400  95.220  1.00  0.00           H
ATOM   3699  HB2 LEU A 531      41.970  -8.420  94.820  1.00  0.00           H
ATOM   3700  CG  LEU A 531      42.770  -6.700  95.960  1.00  0.00           C
ATOM   3701  HG  LEU A 531      41.990  -5.980  95.730  1.00  0.00           H
ATOM   3702  CD1 LEU A 531      42.450  -7.350  97.280  1.00  0.00           C
ATOM   3703 1HD1 LEU A 531      42.430  -6.590  98.070  1.00  0.00           H
ATOM   3704 2HD1 LEU A 531      41.470  -7.780  97.080  1.00  0.00           H
ATOM   3705 3HD1 LEU A 531      43.180  -8.110  97.560  1.00  0.00           H
ATOM   3706  CD2 LEU A 531      44.070  -5.860  96.060  1.00  0.00           C
ATOM   3707 1HD2 LEU A 531      43.960  -5.080  96.810  1.00  0.00           H
ATOM   3708 2HD2 LEU A 531      44.800  -6.590  96.400  1.00  0.00           H
ATOM   3709 3HD2 LEU A 531      44.380  -5.460  95.090  1.00  0.00           H
ATOM   3710  C   LEU A 531      43.630  -8.470  92.470  1.00  0.00           C
ATOM   3711  O   LEU A 531      42.880  -9.070  91.660  1.00  0.00           O
ATOM   3712  N   PRO A 532      44.900  -8.870  92.560  1.00  0.00           N
ATOM   3713  CD  PRO A 532      46.000  -8.230  93.270  1.00  0.00           C
ATOM   3714  HD1 PRO A 532      45.960  -8.570  94.300  1.00  0.00           H
ATOM   3715  HD2 PRO A 532      46.030  -7.150  93.120  1.00  0.00           H
ATOM   3716  CG  PRO A 532      47.290  -8.780  92.670  1.00  0.00           C
ATOM   3717  HG1 PRO A 532      48.030  -8.800  93.470  1.00  0.00           H
ATOM   3718  HG2 PRO A 532      47.680  -8.250  91.800  1.00  0.00           H
ATOM   3719  CB  PRO A 532      46.880 -10.230  92.180  1.00  0.00           C
ATOM   3720  HB1 PRO A 532      47.010 -11.070  92.870  1.00  0.00           H
ATOM   3721  HB2 PRO A 532      47.480 -10.480  91.310  1.00  0.00           H
ATOM   3722  CA  PRO A 532      45.410 -10.110  91.850  1.00  0.00           C
ATOM   3723  HA  PRO A 532      45.230  -9.960  90.780  1.00  0.00           H
ATOM   3724  C   PRO A 532      44.650 -11.450  92.290  1.00  0.00           C
ATOM   3725  O   PRO A 532      44.040 -11.600  93.360  1.00  0.00           O
ATOM   3726  N   PRO A 533      44.630 -12.490  91.420  1.00  0.00           N
ATOM   3727  CD  PRO A 533      45.270 -12.540  90.180  1.00  0.00           C
ATOM   3728  HD1 PRO A 533      46.320 -12.260  90.290  1.00  0.00           H
ATOM   3729  HD2 PRO A 533      44.900 -11.760  89.520  1.00  0.00           H
ATOM   3730  CG  PRO A 533      45.080 -13.890  89.540  1.00  0.00           C
ATOM   3731  HG1 PRO A 533      45.960 -14.470  89.800  1.00  0.00           H
ATOM   3732  HG2 PRO A 533      44.980 -13.920  88.460  1.00  0.00           H
ATOM   3733  CB  PRO A 533      43.750 -14.300  90.140  1.00  0.00           C
ATOM   3734  HB1 PRO A 533      43.620 -15.380  90.170  1.00  0.00           H
ATOM   3735  HB2 PRO A 533      42.860 -13.920  89.620  1.00  0.00           H
ATOM   3736  CA  PRO A 533      43.850 -13.690  91.560  1.00  0.00           C
ATOM   3737  HA  PRO A 533      42.820 -13.450  91.830  1.00  0.00           H
ATOM   3738  C   PRO A 533      44.350 -14.760  92.530  1.00  0.00           C
ATOM   3739  O   PRO A 533      45.550 -14.830  92.740  1.00  0.00           O
ATOM   3740  N   ARG A 534      43.470 -15.540  93.130  1.00  0.00           N
ATOM   3741  H   ARG A 534      42.490 -15.330  92.980  1.00  0.00           H
ATOM   3742  CA  ARG A 534      43.900 -16.560  94.190  1.00  0.00           C
ATOM   3743  HA  ARG A 534      44.970 -16.380  94.330  1.00  0.00           H
ATOM   3744  CB  ARG A 534      43.150 -16.180  95.460  1.00  0.00           C
ATOM   3745  HB1 ARG A 534      43.420 -16.800  96.320  1.00  0.00           H
ATOM   3746  HB2 ARG A 534      42.090 -16.420  95.350  1.00  0.00           H
ATOM   3747  CG  ARG A 534      43.400 -14.730  95.800  1.00  0.00           C
ATOM   3748  HG1 ARG A 534      42.690 -14.190  95.170  1.00  0.00           H
ATOM   3749  HG2 ARG A 534      44.450 -14.440  95.710  1.00  0.00           H
ATOM   3750  CD  ARG A 534      43.030 -14.410  97.290  1.00  0.00           C
ATOM   3751  HD1 ARG A 534      43.630 -15.050  97.940  1.00  0.00           H
ATOM   3752  HD2 ARG A 534      41.960 -14.590  97.320  1.00  0.00           H
ATOM   3753  NE  ARG A 534      43.440 -13.050  97.600  1.00  0.00           N
ATOM   3754  HE  ARG A 534      44.060 -12.630  96.920  1.00  0.00           H
ATOM   3755  CZ  ARG A 534      43.240 -12.360  98.730  1.00  0.00           C
ATOM   3756  NH1 ARG A 534      43.930 -11.300  98.870  1.00  0.00           N
ATOM   3757 1HH1 ARG A 534      44.710 -11.000  98.310  1.00  0.00           H
ATOM   3758 2HH1 ARG A 534      43.770 -10.850  99.760  1.00  0.00           H
ATOM   3759  NH2 ARG A 534      42.330 -12.630  99.650  1.00  0.00           N
ATOM   3760 1HH2 ARG A 534      41.610 -13.330  99.540  1.00  0.00           H
ATOM   3761 2HH2 ARG A 534      42.400 -12.110 100.510  1.00  0.00           H
ATOM   3762  C   ARG A 534      43.680 -18.010  93.840  1.00  0.00           C
ATOM   3763  O   ARG A 534      43.220 -18.410  92.750  1.00  0.00           O
ATOM   3764  N   LEU A 535      43.980 -18.890  94.770  1.00  0.00           N
ATOM   3765  H   LEU A 535      44.320 -18.530  95.650  1.00  0.00           H
ATOM   3766  CA  LEU A 535      43.980 -20.390  94.600  1.00  0.00           C
ATOM   3767  HA  LEU A 535      43.880 -20.580  93.530  1.00  0.00           H
ATOM   3768  CB  LEU A 535      45.200 -21.100  95.160  1.00  0.00           C
ATOM   3769  HB1 LEU A 535      44.930 -22.160  95.190  1.00  0.00           H
ATOM   3770  HB2 LEU A 535      45.350 -20.860  96.210  1.00  0.00           H
ATOM   3771  CG  LEU A 535      46.520 -21.010  94.460  1.00  0.00           C
ATOM   3772  HG  LEU A 535      46.850 -19.990  94.230  1.00  0.00           H
ATOM   3773  CD1 LEU A 535      47.650 -21.680  95.340  1.00  0.00           C
ATOM   3774 1HD1 LEU A 535      47.380 -22.690  95.660  1.00  0.00           H
ATOM   3775 2HD1 LEU A 535      48.550 -21.820  94.740  1.00  0.00           H
ATOM   3776 3HD1 LEU A 535      47.790 -20.990  96.170  1.00  0.00           H
ATOM   3777  CD2 LEU A 535      46.490 -21.720  93.120  1.00  0.00           C
ATOM   3778 1HD2 LEU A 535      47.420 -21.520  92.590  1.00  0.00           H
ATOM   3779 2HD2 LEU A 535      46.380 -22.790  93.290  1.00  0.00           H
ATOM   3780 3HD2 LEU A 535      45.620 -21.310  92.620  1.00  0.00           H
ATOM   3781  C   LEU A 535      42.760 -21.040  95.170  1.00  0.00           C
ATOM   3782  O   LEU A 535      42.250 -20.670  96.260  1.00  0.00           O
ATOM   3783  N   LYS A 536      42.270 -22.100  94.510  1.00  0.00           N
ATOM   3784  H   LYS A 536      42.620 -22.150  93.560  1.00  0.00           H
ATOM   3785  CA  LYS A 536      41.180 -23.020  94.910  1.00  0.00           C
ATOM   3786  HA  LYS A 536      40.350 -22.500  95.400  1.00  0.00           H
ATOM   3787  CB  LYS A 536      40.550 -23.660  93.640  1.00  0.00           C
ATOM   3788  HB1 LYS A 536      39.850 -24.430  93.980  1.00  0.00           H
ATOM   3789  HB2 LYS A 536      41.370 -24.200  93.160  1.00  0.00           H
ATOM   3790  CG  LYS A 536      39.870 -22.740  92.660  1.00  0.00           C
ATOM   3791  HG1 LYS A 536      40.630 -22.040  92.320  1.00  0.00           H
ATOM   3792  HG2 LYS A 536      39.040 -22.310  93.210  1.00  0.00           H
ATOM   3793  CD  LYS A 536      39.420 -23.420  91.310  1.00  0.00           C
ATOM   3794  HD1 LYS A 536      38.670 -24.200  91.440  1.00  0.00           H
ATOM   3795  HD2 LYS A 536      40.300 -23.710  90.740  1.00  0.00           H
ATOM   3796  CE  LYS A 536      38.690 -22.430  90.450  1.00  0.00           C
ATOM   3797  HE1 LYS A 536      37.810 -22.080  91.000  1.00  0.00           H
ATOM   3798  HE2 LYS A 536      38.410 -23.000  89.570  1.00  0.00           H
ATOM   3799  NZ  LYS A 536      39.540 -21.360  90.100  1.00  0.00           N
ATOM   3800  HZ1 LYS A 536      40.310 -21.720  89.560  1.00  0.00           H
ATOM   3801  HZ2 LYS A 536      39.240 -20.680  89.410  1.00  0.00           H
ATOM   3802  HZ3 LYS A 536      39.950 -20.840  90.860  1.00  0.00           H
ATOM   3803  C   LYS A 536      41.670 -24.100  95.870  1.00  0.00           C
ATOM   3804  O   LYS A 536      40.870 -24.640  96.630  1.00  0.00           O
ATOM   3805  N   ASN A 537      42.940 -24.450  95.780  1.00  0.00           N
ATOM   3806  H   ASN A 537      43.440 -24.160  94.950  1.00  0.00           H
ATOM   3807  CA  ASN A 537      43.570 -25.470  96.700  1.00  0.00           C
ATOM   3808  HA  ASN A 537      42.740 -25.890  97.260  1.00  0.00           H
ATOM   3809  CB  ASN A 537      44.430 -26.450  95.810  1.00  0.00           C
ATOM   3810  HB1 ASN A 537      44.990 -27.090  96.480  1.00  0.00           H
ATOM   3811  HB2 ASN A 537      45.190 -26.020  95.160  1.00  0.00           H
ATOM   3812  CG  ASN A 537      43.530 -27.380  94.960  1.00  0.00           C
ATOM   3813  OD1 ASN A 537      43.150 -28.500  95.250  1.00  0.00           O
ATOM   3814  ND2 ASN A 537      43.040 -26.790  93.940  1.00  0.00           N
ATOM   3815 1HD2 ASN A 537      43.380 -25.920  93.560  1.00  0.00           H
ATOM   3816 2HD2 ASN A 537      42.360 -27.310  93.400  1.00  0.00           H
ATOM   3817  C   ASN A 537      44.380 -24.730  97.740  1.00  0.00           C
ATOM   3818  O   ASN A 537      45.370 -25.330  98.250  1.00  0.00           O
ATOM   3819  N   LEU A 538      44.100 -23.480  98.100  1.00  0.00           N
ATOM   3820  H   LEU A 538      43.470 -22.960  97.510  1.00  0.00           H
ATOM   3821  CA  LEU A 538      44.810 -22.720  99.160  1.00  0.00           C
ATOM   3822  HA  LEU A 538      45.800 -22.480  98.760  1.00  0.00           H
ATOM   3823  CB  LEU A 538      44.240 -21.330  99.390  1.00  0.00           C
ATOM   3824  HB1 LEU A 538      43.340 -21.530  99.970  1.00  0.00           H
ATOM   3825  HB2 LEU A 538      43.940 -20.940  98.420  1.00  0.00           H
ATOM   3826  CG  LEU A 538      45.090 -20.300 100.120  1.00  0.00           C
ATOM   3827  HG  LEU A 538      45.180 -20.470 101.190  1.00  0.00           H
ATOM   3828  CD1 LEU A 538      46.630 -20.210  99.630  1.00  0.00           C
ATOM   3829 1HD1 LEU A 538      47.080 -19.260  99.920  1.00  0.00           H
ATOM   3830 2HD1 LEU A 538      47.280 -21.060  99.810  1.00  0.00           H
ATOM   3831 3HD1 LEU A 538      46.680 -20.330  98.540  1.00  0.00           H
ATOM   3832  CD2 LEU A 538      44.480 -18.910  99.800  1.00  0.00           C
ATOM   3833 1HD2 LEU A 538      44.610 -18.680  98.740  1.00  0.00           H
ATOM   3834 2HD2 LEU A 538      43.420 -18.740 100.000  1.00  0.00           H
ATOM   3835 3HD2 LEU A 538      45.020 -18.070 100.230  1.00  0.00           H
ATOM   3836  C   LEU A 538      45.040 -23.340 100.530  1.00  0.00           C
ATOM   3837  O   LEU A 538      46.050 -22.990 101.180  1.00  0.00           O
ATOM   3838  N   HIS A 539      44.310 -24.360 100.930  1.00  0.00           N
ATOM   3839  H   HIS A 539      43.550 -24.580 100.300  1.00  0.00           H
ATOM   3840  CA  HIS A 539      44.490 -25.200 102.070  1.00  0.00           C
ATOM   3841  HA  HIS A 539      44.840 -24.590 102.910  1.00  0.00           H
ATOM   3842  CB  HIS A 539      43.090 -25.640 102.480  1.00  0.00           C
ATOM   3843  HB1 HIS A 539      42.480 -24.740 102.620  1.00  0.00           H
ATOM   3844  HB2 HIS A 539      43.030 -26.000 103.510  1.00  0.00           H
ATOM   3845  CG  HIS A 539      42.520 -26.720 101.630  1.00  0.00           C
ATOM   3846  ND1 HIS A 539      42.250 -26.470 100.250  1.00  0.00           N
ATOM   3847  CE1 HIS A 539      41.800 -27.610  99.790  1.00  0.00           C
ATOM   3848  HE1 HIS A 539      41.400 -27.650  98.780  1.00  0.00           H
ATOM   3849  NE2 HIS A 539      41.770 -28.530 100.690  1.00  0.00           N
ATOM   3850  HE2 HIS A 539      41.330 -29.420 100.520  1.00  0.00           H
ATOM   3851  CD2 HIS A 539      42.230 -28.020 101.910  1.00  0.00           C
ATOM   3852  HD2 HIS A 539      42.250 -28.620 102.810  1.00  0.00           H
ATOM   3853  C   HIS A 539      45.490 -26.290 101.860  1.00  0.00           C
ATOM   3854  O   HIS A 539      45.900 -27.010 102.820  1.00  0.00           O
ATOM   3855  N   LYS A 540      46.090 -26.390 100.630  1.00  0.00           N
ATOM   3856  H   LYS A 540      45.650 -25.790  99.950  1.00  0.00           H
ATOM   3857  CA  LYS A 540      47.070 -27.490 100.300  1.00  0.00           C
ATOM   3858  HA  LYS A 540      47.330 -27.930 101.270  1.00  0.00           H
ATOM   3859  CB  LYS A 540      46.410 -28.710  99.520  1.00  0.00           C
ATOM   3860  HB1 LYS A 540      47.220 -29.420  99.370  1.00  0.00           H
ATOM   3861  HB2 LYS A 540      46.010 -28.460  98.540  1.00  0.00           H
ATOM   3862  CG  LYS A 540      45.430 -29.570 100.350  1.00  0.00           C
ATOM   3863  HG1 LYS A 540      44.710 -28.800 100.630  1.00  0.00           H
ATOM   3864  HG2 LYS A 540      45.950 -30.060 101.170  1.00  0.00           H
ATOM   3865  CD  LYS A 540      44.740 -30.540  99.430  1.00  0.00           C
ATOM   3866  HD1 LYS A 540      45.560 -31.090  98.960  1.00  0.00           H
ATOM   3867  HD2 LYS A 540      44.240 -29.910  98.700  1.00  0.00           H
ATOM   3868  CE  LYS A 540      43.700 -31.440 100.120  1.00  0.00           C
ATOM   3869  HE1 LYS A 540      42.940 -30.840 100.600  1.00  0.00           H
ATOM   3870  HE2 LYS A 540      44.250 -32.040 100.840  1.00  0.00           H
ATOM   3871  NZ  LYS A 540      43.060 -32.270  99.130  1.00  0.00           N
ATOM   3872  HZ1 LYS A 540      42.120 -31.960  98.950  1.00  0.00           H
ATOM   3873  HZ2 LYS A 540      43.560 -32.230  98.260  1.00  0.00           H
ATOM   3874  HZ3 LYS A 540      42.950 -33.240  99.410  1.00  0.00           H
ATOM   3875  C   LYS A 540      48.420 -26.970  99.860  1.00  0.00           C
ATOM   3876  O   LYS A 540      49.110 -27.650  99.030  1.00  0.00           O
ATOM   3877  N   VAL A 541      48.870 -25.780 100.300  1.00  0.00           N
ATOM   3878  H   VAL A 541      48.400 -25.460 101.140  1.00  0.00           H
ATOM   3879  CA  VAL A 541      50.200 -25.220  99.990  1.00  0.00           C
ATOM   3880  HA  VAL A 541      50.770 -26.050  99.580  1.00  0.00           H
ATOM   3881  CB  VAL A 541      50.170 -24.140  98.890  1.00  0.00           C
ATOM   3882  HB  VAL A 541      51.180 -23.760  98.730  1.00  0.00           H
ATOM   3883  CG1 VAL A 541      49.640 -24.650  97.540  1.00  0.00           C
ATOM   3884 1HG1 VAL A 541      50.250 -25.470  97.150  1.00  0.00           H
ATOM   3885 2HG1 VAL A 541      48.670 -25.080  97.750  1.00  0.00           H
ATOM   3886 3HG1 VAL A 541      49.610 -23.790  96.860  1.00  0.00           H
ATOM   3887  CG2 VAL A 541      49.250 -22.970  99.230  1.00  0.00           C
ATOM   3888 1HG2 VAL A 541      48.210 -23.180  98.960  1.00  0.00           H
ATOM   3889 2HG2 VAL A 541      49.290 -22.780 100.300  1.00  0.00           H
ATOM   3890 3HG2 VAL A 541      49.380 -22.010  98.730  1.00  0.00           H
ATOM   3891  C   VAL A 541      50.870 -24.590 101.220  1.00  0.00           C
ATOM   3892  O   VAL A 541      50.260 -24.310 102.270  1.00  0.00           O
ATOM   3893  N   SER A 542      52.170 -24.550 101.210  1.00  0.00           N
ATOM   3894  H   SER A 542      52.600 -24.860 100.340  1.00  0.00           H
ATOM   3895  CA  SER A 542      53.050 -24.010 102.200  1.00  0.00           C
ATOM   3896  HA  SER A 542      52.830 -24.440 103.170  1.00  0.00           H
ATOM   3897  CB  SER A 542      54.510 -24.490 101.840  1.00  0.00           C
ATOM   3898  HB1 SER A 542      54.500 -25.550 101.570  1.00  0.00           H
ATOM   3899  HB2 SER A 542      55.230 -24.400 102.650  1.00  0.00           H
ATOM   3900  OG  SER A 542      54.950 -23.860 100.710  1.00  0.00           O
ATOM   3901  HG  SER A 542      54.700 -24.460 100.000  1.00  0.00           H
ATOM   3902  C   SER A 542      53.010 -22.500 102.350  1.00  0.00           C
ATOM   3903  O   SER A 542      52.650 -21.800 101.340  1.00  0.00           O
ATOM   3904  N   PRO A 543      53.500 -21.950 103.490  1.00  0.00           N
ATOM   3905  CD  PRO A 543      53.500 -22.590 104.790  1.00  0.00           C
ATOM   3906  HD1 PRO A 543      53.680 -23.660 104.790  1.00  0.00           H
ATOM   3907  HD2 PRO A 543      52.520 -22.460 105.260  1.00  0.00           H
ATOM   3908  CG  PRO A 543      54.570 -21.710 105.550  1.00  0.00           C
ATOM   3909  HG1 PRO A 543      55.570 -21.870 105.150  1.00  0.00           H
ATOM   3910  HG2 PRO A 543      54.560 -21.800 106.630  1.00  0.00           H
ATOM   3911  CB  PRO A 543      54.200 -20.260 105.080  1.00  0.00           C
ATOM   3912  HB1 PRO A 543      55.110 -19.660 105.150  1.00  0.00           H
ATOM   3913  HB2 PRO A 543      53.380 -19.820 105.650  1.00  0.00           H
ATOM   3914  CA  PRO A 543      53.760 -20.520 103.670  1.00  0.00           C
ATOM   3915  HA  PRO A 543      52.810 -19.990 103.550  1.00  0.00           H
ATOM   3916  C   PRO A 543      54.750 -19.930 102.710  1.00  0.00           C
ATOM   3917  O   PRO A 543      54.690 -18.730 102.450  1.00  0.00           O
ATOM   3918  N   SER A 544      55.630 -20.720 102.120  1.00  0.00           N
ATOM   3919  H   SER A 544      55.730 -21.710 102.290  1.00  0.00           H
ATOM   3920  CA  SER A 544      56.610 -20.210 101.100  1.00  0.00           C
ATOM   3921  HA  SER A 544      56.800 -19.190 101.420  1.00  0.00           H
ATOM   3922  CB  SER A 544      57.880 -21.010 101.240  1.00  0.00           C
ATOM   3923  HB1 SER A 544      58.160 -20.990 102.300  1.00  0.00           H
ATOM   3924  HB2 SER A 544      58.680 -20.640 100.610  1.00  0.00           H
ATOM   3925  OG  SER A 544      57.690 -22.380 100.920  1.00  0.00           O
ATOM   3926  HG  SER A 544      58.530 -22.830 101.000  1.00  0.00           H
ATOM   3927  C   SER A 544      55.970 -20.080  99.740  1.00  0.00           C
ATOM   3928  O   SER A 544      56.180 -19.090  99.060  1.00  0.00           O
ATOM   3929  N   LEU A 545      55.200 -21.090  99.190  1.00  0.00           N
ATOM   3930  H   LEU A 545      55.010 -21.900  99.770  1.00  0.00           H
ATOM   3931  CA  LEU A 545      54.430 -20.870  97.990  1.00  0.00           C
ATOM   3932  HA  LEU A 545      55.180 -20.540  97.270  1.00  0.00           H
ATOM   3933  CB  LEU A 545      53.700 -22.260  97.600  1.00  0.00           C
ATOM   3934  HB1 LEU A 545      53.110 -22.640  98.440  1.00  0.00           H
ATOM   3935  HB2 LEU A 545      54.480 -23.020  97.500  1.00  0.00           H
ATOM   3936  CG  LEU A 545      52.870 -22.240  96.280  1.00  0.00           C
ATOM   3937  HG  LEU A 545      51.920 -21.750  96.470  1.00  0.00           H
ATOM   3938  CD1 LEU A 545      53.650 -21.550  95.130  1.00  0.00           C
ATOM   3939 1HD1 LEU A 545      53.710 -20.490  95.360  1.00  0.00           H
ATOM   3940 2HD1 LEU A 545      54.660 -21.980  95.070  1.00  0.00           H
ATOM   3941 3HD1 LEU A 545      53.120 -21.660  94.190  1.00  0.00           H
ATOM   3942  CD2 LEU A 545      52.510 -23.630  95.700  1.00  0.00           C
ATOM   3943 1HD2 LEU A 545      52.350 -24.290  96.560  1.00  0.00           H
ATOM   3944 2HD2 LEU A 545      51.590 -23.460  95.130  1.00  0.00           H
ATOM   3945 3HD2 LEU A 545      53.330 -24.010  95.100  1.00  0.00           H
ATOM   3946  C   LEU A 545      53.420 -19.720  98.180  1.00  0.00           C
ATOM   3947  O   LEU A 545      53.180 -18.970  97.230  1.00  0.00           O
ATOM   3948  N   LYS A 546      52.800 -19.550  99.360  1.00  0.00           N
ATOM   3949  H   LYS A 546      53.010 -20.210 100.100  1.00  0.00           H
ATOM   3950  CA  LYS A 546      51.830 -18.460  99.610  1.00  0.00           C
ATOM   3951  HA  LYS A 546      50.960 -18.500  98.960  1.00  0.00           H
ATOM   3952  CB  LYS A 546      51.420 -18.570 101.040  1.00  0.00           C
ATOM   3953  HB1 LYS A 546      51.090 -17.670 101.570  1.00  0.00           H
ATOM   3954  HB2 LYS A 546      52.310 -18.850 101.590  1.00  0.00           H
ATOM   3955  CG  LYS A 546      50.260 -19.620 101.020  1.00  0.00           C
ATOM   3956  HG1 LYS A 546      50.500 -20.560 100.530  1.00  0.00           H
ATOM   3957  HG2 LYS A 546      49.390 -19.170 100.540  1.00  0.00           H
ATOM   3958  CD  LYS A 546      49.940 -20.070 102.480  1.00  0.00           C
ATOM   3959  HD1 LYS A 546      49.810 -19.240 103.170  1.00  0.00           H
ATOM   3960  HD2 LYS A 546      50.680 -20.780 102.840  1.00  0.00           H
ATOM   3961  CE  LYS A 546      48.590 -20.830 102.440  1.00  0.00           C
ATOM   3962  HE1 LYS A 546      48.720 -21.740 101.850  1.00  0.00           H
ATOM   3963  HE2 LYS A 546      47.780 -20.280 101.950  1.00  0.00           H
ATOM   3964  NZ  LYS A 546      48.190 -21.270 103.820  1.00  0.00           N
ATOM   3965  HZ1 LYS A 546      48.820 -21.920 104.270  1.00  0.00           H
ATOM   3966  HZ2 LYS A 546      48.060 -20.450 104.400  1.00  0.00           H
ATOM   3967  HZ3 LYS A 546      47.290 -21.720 103.780  1.00  0.00           H
ATOM   3968  C   LYS A 546      52.540 -17.080  99.330  1.00  0.00           C
ATOM   3969  O   LYS A 546      51.890 -16.130  98.990  1.00  0.00           O
ATOM   3970  N   GLY A 547      53.900 -16.950  99.510  1.00  0.00           N
ATOM   3971  H   GLY A 547      54.450 -17.730  99.830  1.00  0.00           H
ATOM   3972  CA  GLY A 547      54.550 -15.680  99.210  1.00  0.00           C
ATOM   3973  HA1 GLY A 547      55.470 -15.810  99.790  1.00  0.00           H
ATOM   3974  HA2 GLY A 547      54.000 -14.810  99.560  1.00  0.00           H
ATOM   3975  C   GLY A 547      54.990 -15.560  97.770  1.00  0.00           C
ATOM   3976  O   GLY A 547      55.080 -14.470  97.230  1.00  0.00           O
ATOM   3977  N   PHE A 548      55.210 -16.690  97.030  1.00  0.00           N
ATOM   3978  H   PHE A 548      55.050 -17.600  97.430  1.00  0.00           H
ATOM   3979  CA  PHE A 548      55.610 -16.740  95.600  1.00  0.00           C
ATOM   3980  HA  PHE A 548      56.430 -16.070  95.370  1.00  0.00           H
ATOM   3981  CB  PHE A 548      56.000 -18.200  95.240  1.00  0.00           C
ATOM   3982  HB1 PHE A 548      55.090 -18.770  95.050  1.00  0.00           H
ATOM   3983  HB2 PHE A 548      56.570 -18.620  96.060  1.00  0.00           H
ATOM   3984  CG  PHE A 548      56.880 -18.290  94.030  1.00  0.00           C
ATOM   3985  CD1 PHE A 548      58.250 -17.870  94.070  1.00  0.00           C
ATOM   3986  HD1 PHE A 548      58.640 -17.390  94.960  1.00  0.00           H
ATOM   3987  CE1 PHE A 548      59.120 -18.100  93.010  1.00  0.00           C
ATOM   3988  HE1 PHE A 548      60.120 -17.710  92.910  1.00  0.00           H
ATOM   3989  CZ  PHE A 548      58.560 -18.700  91.850  1.00  0.00           C
ATOM   3990  HZ  PHE A 548      59.160 -18.850  90.970  1.00  0.00           H
ATOM   3991  CE2 PHE A 548      57.230 -19.070  91.760  1.00  0.00           C
ATOM   3992  HE2 PHE A 548      56.930 -19.600  90.870  1.00  0.00           H
ATOM   3993  CD2 PHE A 548      56.430 -18.980  92.910  1.00  0.00           C
ATOM   3994  HD2 PHE A 548      55.450 -19.450  92.950  1.00  0.00           H
ATOM   3995  C   PHE A 548      54.510 -16.110  94.700  1.00  0.00           C
ATOM   3996  O   PHE A 548      54.750 -15.120  93.990  1.00  0.00           O
ATOM   3997  N   LEU A 549      53.290 -16.670  94.920  1.00  0.00           N
ATOM   3998  H   LEU A 549      53.230 -17.410  95.610  1.00  0.00           H
ATOM   3999  CA  LEU A 549      52.020 -16.040  94.500  1.00  0.00           C
ATOM   4000  HA  LEU A 549      51.910 -16.120  93.420  1.00  0.00           H
ATOM   4001  CB  LEU A 549      50.710 -16.740  95.080  1.00  0.00           C
ATOM   4002  HB1 LEU A 549      49.900 -16.070  94.790  1.00  0.00           H
ATOM   4003  HB2 LEU A 549      50.820 -16.670  96.160  1.00  0.00           H
ATOM   4004  CG  LEU A 549      50.730 -18.200  94.630  1.00  0.00           C
ATOM   4005  HG  LEU A 549      51.760 -18.510  94.510  1.00  0.00           H
ATOM   4006  CD1 LEU A 549      50.020 -19.230  95.500  1.00  0.00           C
ATOM   4007 1HD1 LEU A 549      48.990 -18.910  95.660  1.00  0.00           H
ATOM   4008 2HD1 LEU A 549      50.020 -20.190  94.990  1.00  0.00           H
ATOM   4009 3HD1 LEU A 549      50.580 -19.380  96.430  1.00  0.00           H
ATOM   4010  CD2 LEU A 549      50.080 -18.360  93.320  1.00  0.00           C
ATOM   4011 1HD2 LEU A 549      49.020 -18.100  93.340  1.00  0.00           H
ATOM   4012 2HD2 LEU A 549      50.440 -17.650  92.570  1.00  0.00           H
ATOM   4013 3HD2 LEU A 549      50.330 -19.360  92.960  1.00  0.00           H
ATOM   4014  C   LEU A 549      51.930 -14.530  94.780  1.00  0.00           C
ATOM   4015  O   LEU A 549      51.470 -13.850  93.870  1.00  0.00           O
ATOM   4016  N   ASP A 550      52.420 -14.040  95.920  1.00  0.00           N
ATOM   4017  H   ASP A 550      52.870 -14.690  96.550  1.00  0.00           H
ATOM   4018  CA  ASP A 550      52.250 -12.590  96.250  1.00  0.00           C
ATOM   4019  HA  ASP A 550      51.230 -12.390  95.950  1.00  0.00           H
ATOM   4020  CB  ASP A 550      52.590 -12.430  97.710  1.00  0.00           C
ATOM   4021  HB1 ASP A 550      53.630 -12.700  97.860  1.00  0.00           H
ATOM   4022  HB2 ASP A 550      51.840 -13.070  98.180  1.00  0.00           H
ATOM   4023  CG  ASP A 550      52.400 -11.050  98.330  1.00  0.00           C
ATOM   4024  OD1 ASP A 550      51.220 -10.640  98.450  1.00  0.00           O
ATOM   4025  OD2 ASP A 550      53.350 -10.480  98.860  1.00  0.00           O
ATOM   4026  C   ASP A 550      53.250 -11.630  95.510  1.00  0.00           C
ATOM   4027  O   ASP A 550      53.030 -10.410  95.430  1.00  0.00           O
ATOM   4028  N   ARG A 551      54.480 -12.180  95.140  1.00  0.00           N
ATOM   4029  H   ARG A 551      54.640 -13.160  95.330  1.00  0.00           H
ATOM   4030  CA  ARG A 551      55.590 -11.450  94.450  1.00  0.00           C
ATOM   4031  HA  ARG A 551      55.600 -10.380  94.670  1.00  0.00           H
ATOM   4032  CB  ARG A 551      56.990 -11.940  94.890  1.00  0.00           C
ATOM   4033  HB1 ARG A 551      57.810 -11.480  94.340  1.00  0.00           H
ATOM   4034  HB2 ARG A 551      57.150 -13.000  94.700  1.00  0.00           H
ATOM   4035  CG  ARG A 551      57.320 -11.740  96.390  1.00  0.00           C
ATOM   4036  HG1 ARG A 551      56.840 -12.600  96.840  1.00  0.00           H
ATOM   4037  HG2 ARG A 551      56.900 -10.790  96.730  1.00  0.00           H
ATOM   4038  CD  ARG A 551      58.850 -11.780  96.660  1.00  0.00           C
ATOM   4039  HD1 ARG A 551      59.280 -12.480  95.950  1.00  0.00           H
ATOM   4040  HD2 ARG A 551      59.040 -12.150  97.680  1.00  0.00           H
ATOM   4041  NE  ARG A 551      59.280 -10.410  96.340  1.00  0.00           N
ATOM   4042  HE  ARG A 551      58.610  -9.740  95.990  1.00  0.00           H
ATOM   4043  CZ  ARG A 551      60.560 -10.130  96.100  1.00  0.00           C
ATOM   4044  NH1 ARG A 551      61.560 -10.900  96.340  1.00  0.00           N
ATOM   4045 1HH1 ARG A 551      61.430 -11.710  96.930  1.00  0.00           H
ATOM   4046 2HH1 ARG A 551      62.490 -10.530  96.250  1.00  0.00           H
ATOM   4047  NH2 ARG A 551      60.830  -8.930  95.670  1.00  0.00           N
ATOM   4048 1HH2 ARG A 551      60.150  -8.230  95.930  1.00  0.00           H
ATOM   4049 2HH2 ARG A 551      61.800  -8.700  95.500  1.00  0.00           H
ATOM   4050  C   ARG A 551      55.480 -11.450  92.920  1.00  0.00           C
ATOM   4051  O   ARG A 551      55.840 -10.500  92.180  1.00  0.00           O
ATOM   4052  N   LEU A 552      55.010 -12.580  92.310  1.00  0.00           N
ATOM   4053  H   LEU A 552      54.810 -13.330  92.960  1.00  0.00           H
ATOM   4054  CA  LEU A 552      54.520 -12.770  90.940  1.00  0.00           C
ATOM   4055  HA  LEU A 552      55.360 -12.460  90.330  1.00  0.00           H
ATOM   4056  CB  LEU A 552      54.170 -14.290  90.840  1.00  0.00           C
ATOM   4057  HB1 LEU A 552      53.680 -14.340  89.870  1.00  0.00           H
ATOM   4058  HB2 LEU A 552      53.430 -14.550  91.590  1.00  0.00           H
ATOM   4059  CG  LEU A 552      55.260 -15.370  90.740  1.00  0.00           C
ATOM   4060  HG  LEU A 552      55.710 -15.470  91.720  1.00  0.00           H
ATOM   4061  CD1 LEU A 552      54.690 -16.740  90.360  1.00  0.00           C
ATOM   4062 1HD1 LEU A 552      53.960 -17.090  91.080  1.00  0.00           H
ATOM   4063 2HD1 LEU A 552      54.180 -16.690  89.390  1.00  0.00           H
ATOM   4064 3HD1 LEU A 552      55.470 -17.490  90.230  1.00  0.00           H
ATOM   4065  CD2 LEU A 552      56.270 -14.970  89.640  1.00  0.00           C
ATOM   4066 1HD2 LEU A 552      55.670 -14.750  88.760  1.00  0.00           H
ATOM   4067 2HD2 LEU A 552      56.830 -14.060  89.860  1.00  0.00           H
ATOM   4068 3HD2 LEU A 552      56.980 -15.770  89.420  1.00  0.00           H
ATOM   4069  C   LEU A 552      53.320 -12.010  90.460  1.00  0.00           C
ATOM   4070  O   LEU A 552      53.420 -11.150  89.600  1.00  0.00           O
ATOM   4071  N   LEU A 553      52.190 -12.250  91.170  1.00  0.00           N
ATOM   4072  H   LEU A 553      52.230 -12.900  91.940  1.00  0.00           H
ATOM   4073  CA  LEU A 553      50.910 -11.660  90.820  1.00  0.00           C
ATOM   4074  HA  LEU A 553      50.920 -11.460  89.750  1.00  0.00           H
ATOM   4075  CB  LEU A 553      49.770 -12.620  91.110  1.00  0.00           C
ATOM   4076  HB1 LEU A 553      48.860 -12.080  90.850  1.00  0.00           H
ATOM   4077  HB2 LEU A 553      49.840 -12.870  92.170  1.00  0.00           H
ATOM   4078  CG  LEU A 553      49.720 -13.960  90.330  1.00  0.00           C
ATOM   4079  HG  LEU A 553      50.750 -14.290  90.150  1.00  0.00           H
ATOM   4080  CD1 LEU A 553      48.960 -15.110  91.040  1.00  0.00           C
ATOM   4081 1HD1 LEU A 553      49.300 -15.460  92.010  1.00  0.00           H
ATOM   4082 2HD1 LEU A 553      47.930 -14.800  91.200  1.00  0.00           H
ATOM   4083 3HD1 LEU A 553      48.960 -16.020  90.440  1.00  0.00           H
ATOM   4084  CD2 LEU A 553      49.170 -13.790  88.990  1.00  0.00           C
ATOM   4085 1HD2 LEU A 553      48.820 -14.750  88.610  1.00  0.00           H
ATOM   4086 2HD2 LEU A 553      48.290 -13.160  89.090  1.00  0.00           H
ATOM   4087 3HD2 LEU A 553      49.930 -13.370  88.330  1.00  0.00           H
ATOM   4088  C   LEU A 553      50.700 -10.220  91.370  1.00  0.00           C
ATOM   4089  O   LEU A 553      50.020 -10.060  92.370  1.00  0.00           O
ATOM   4090  N   VAL A 554      51.470  -9.250  90.880  1.00  0.00           N
ATOM   4091  H   VAL A 554      52.030  -9.350  90.050  1.00  0.00           H
ATOM   4092  CA  VAL A 554      51.290  -7.890  91.440  1.00  0.00           C
ATOM   4093  HA  VAL A 554      50.560  -7.970  92.240  1.00  0.00           H
ATOM   4094  CB  VAL A 554      52.550  -7.270  92.120  1.00  0.00           C
ATOM   4095  HB  VAL A 554      53.360  -7.060  91.420  1.00  0.00           H
ATOM   4096  CG1 VAL A 554      52.170  -5.900  92.760  1.00  0.00           C
ATOM   4097 1HG1 VAL A 554      51.890  -5.220  91.960  1.00  0.00           H
ATOM   4098 2HG1 VAL A 554      51.340  -5.930  93.470  1.00  0.00           H
ATOM   4099 3HG1 VAL A 554      53.090  -5.580  93.250  1.00  0.00           H
ATOM   4100  CG2 VAL A 554      53.240  -8.100  93.160  1.00  0.00           C
ATOM   4101 1HG2 VAL A 554      54.170  -7.650  93.490  1.00  0.00           H
ATOM   4102 2HG2 VAL A 554      52.680  -8.270  94.080  1.00  0.00           H
ATOM   4103 3HG2 VAL A 554      53.500  -9.020  92.630  1.00  0.00           H
ATOM   4104  C   VAL A 554      50.680  -6.950  90.400  1.00  0.00           C
ATOM   4105  O   VAL A 554      51.070  -6.960  89.230  1.00  0.00           O
ATOM   4106  N   ARG A 555      49.730  -6.130  90.790  1.00  0.00           N
ATOM   4107  H   ARG A 555      49.320  -6.240  91.710  1.00  0.00           H
ATOM   4108  CA  ARG A 555      49.030  -5.320  89.850  1.00  0.00           C
ATOM   4109  HA  ARG A 555      48.780  -5.910  88.970  1.00  0.00           H
ATOM   4110  CB  ARG A 555      47.820  -4.740  90.540  1.00  0.00           C
ATOM   4111  HB1 ARG A 555      48.100  -4.140  91.410  1.00  0.00           H
ATOM   4112  HB2 ARG A 555      47.370  -5.590  91.040  1.00  0.00           H
ATOM   4113  CG  ARG A 555      46.760  -4.210  89.650  1.00  0.00           C
ATOM   4114  HG1 ARG A 555      46.490  -5.010  88.960  1.00  0.00           H
ATOM   4115  HG2 ARG A 555      47.020  -3.320  89.080  1.00  0.00           H
ATOM   4116  CD  ARG A 555      45.670  -3.650  90.640  1.00  0.00           C
ATOM   4117  HD1 ARG A 555      46.020  -2.970  91.410  1.00  0.00           H
ATOM   4118  HD2 ARG A 555      45.290  -4.550  91.110  1.00  0.00           H
ATOM   4119  NE  ARG A 555      44.600  -2.950  89.900  1.00  0.00           N
ATOM   4120  HE  ARG A 555      43.800  -3.500  89.630  1.00  0.00           H
ATOM   4121  CZ  ARG A 555      44.500  -1.760  89.350  1.00  0.00           C
ATOM   4122  NH1 ARG A 555      45.470  -0.950  89.480  1.00  0.00           N
ATOM   4123 1HH1 ARG A 555      46.290  -1.230  90.000  1.00  0.00           H
ATOM   4124 2HH1 ARG A 555      45.270   0.020  89.250  1.00  0.00           H
ATOM   4125  NH2 ARG A 555      43.430  -1.430  88.660  1.00  0.00           N
ATOM   4126 1HH2 ARG A 555      42.600  -1.990  88.710  1.00  0.00           H
ATOM   4127 2HH2 ARG A 555      43.470  -0.530  88.200  1.00  0.00           H
ATOM   4128  C   ARG A 555      49.920  -4.240  89.270  1.00  0.00           C
ATOM   4129  O   ARG A 555      50.100  -4.120  88.070  1.00  0.00           O
ATOM   4130  N   ASP A 556      50.450  -3.430  90.210  1.00  0.00           N
ATOM   4131  H   ASP A 556      50.180  -3.500  91.180  1.00  0.00           H
ATOM   4132  CA  ASP A 556      51.580  -2.550  89.960  1.00  0.00           C
ATOM   4133  HA  ASP A 556      51.130  -1.840  89.260  1.00  0.00           H
ATOM   4134  CB  ASP A 556      51.830  -1.750  91.280  1.00  0.00           C
ATOM   4135  HB1 ASP A 556      51.880  -2.440  92.120  1.00  0.00           H
ATOM   4136  HB2 ASP A 556      51.010  -1.040  91.420  1.00  0.00           H
ATOM   4137  CG  ASP A 556      53.190  -1.050  91.410  1.00  0.00           C
ATOM   4138  OD1 ASP A 556      53.620  -0.750  92.600  1.00  0.00           O
ATOM   4139  OD2 ASP A 556      53.810  -0.670  90.360  1.00  0.00           O
ATOM   4140  C   ASP A 556      52.780  -3.350  89.430  1.00  0.00           C
ATOM   4141  O   ASP A 556      53.140  -4.370  89.960  1.00  0.00           O
ATOM   4142  N   PRO A 557      53.430  -2.900  88.320  1.00  0.00           N
ATOM   4143  CD  PRO A 557      52.840  -2.030  87.310  1.00  0.00           C
ATOM   4144  HD1 PRO A 557      53.130  -0.990  87.430  1.00  0.00           H
ATOM   4145  HD2 PRO A 557      51.750  -2.030  87.230  1.00  0.00           H
ATOM   4146  CG  PRO A 557      53.470  -2.470  86.000  1.00  0.00           C
ATOM   4147  HG1 PRO A 557      53.650  -1.530  85.480  1.00  0.00           H
ATOM   4148  HG2 PRO A 557      52.750  -3.060  85.440  1.00  0.00           H
ATOM   4149  CB  PRO A 557      54.770  -3.150  86.290  1.00  0.00           C
ATOM   4150  HB1 PRO A 557      55.540  -2.390  86.280  1.00  0.00           H
ATOM   4151  HB2 PRO A 557      55.130  -3.890  85.580  1.00  0.00           H
ATOM   4152  CA  PRO A 557      54.570  -3.610  87.770  1.00  0.00           C
ATOM   4153  HA  PRO A 557      54.340  -4.670  87.710  1.00  0.00           H
ATOM   4154  C   PRO A 557      55.830  -3.260  88.600  1.00  0.00           C
ATOM   4155  O   PRO A 557      56.820  -4.030  88.490  1.00  0.00           O
ATOM   4156  N   ALA A 558      55.910  -2.180  89.360  1.00  0.00           N
ATOM   4157  H   ALA A 558      55.110  -1.570  89.330  1.00  0.00           H
ATOM   4158  CA  ALA A 558      57.160  -1.700  89.970  1.00  0.00           C
ATOM   4159  HA  ALA A 558      57.970  -1.910  89.260  1.00  0.00           H
ATOM   4160  CB  ALA A 558      57.160  -0.160  90.310  1.00  0.00           C
ATOM   4161  HB1 ALA A 558      56.980   0.410  89.390  1.00  0.00           H
ATOM   4162  HB2 ALA A 558      56.320   0.090  90.950  1.00  0.00           H
ATOM   4163  HB3 ALA A 558      58.120   0.140  90.740  1.00  0.00           H
ATOM   4164  C   ALA A 558      57.390  -2.560  91.230  1.00  0.00           C
ATOM   4165  O   ALA A 558      58.570  -2.940  91.470  1.00  0.00           O
ATOM   4166  N   GLN A 559      56.360  -2.920  92.010  1.00  0.00           N
ATOM   4167  H   GLN A 559      55.460  -2.520  91.830  1.00  0.00           H
ATOM   4168  CA  GLN A 559      56.550  -3.860  93.130  1.00  0.00           C
ATOM   4169  HA  GLN A 559      57.410  -3.630  93.750  1.00  0.00           H
ATOM   4170  CB  GLN A 559      55.240  -3.700  94.020  1.00  0.00           C
ATOM   4171  HB1 GLN A 559      54.370  -3.740  93.380  1.00  0.00           H
ATOM   4172  HB2 GLN A 559      55.240  -2.680  94.420  1.00  0.00           H
ATOM   4173  CG  GLN A 559      55.210  -4.680  95.210  1.00  0.00           C
ATOM   4174  HG1 GLN A 559      56.100  -4.580  95.820  1.00  0.00           H
ATOM   4175  HG2 GLN A 559      55.180  -5.670  94.780  1.00  0.00           H
ATOM   4176  CD  GLN A 559      53.950  -4.460  96.050  1.00  0.00           C
ATOM   4177  OE1 GLN A 559      52.880  -4.980  95.750  1.00  0.00           O
ATOM   4178  NE2 GLN A 559      54.060  -3.580  97.030  1.00  0.00           N
ATOM   4179 1HE2 GLN A 559      54.950  -3.160  97.230  1.00  0.00           H
ATOM   4180 2HE2 GLN A 559      53.210  -3.370  97.550  1.00  0.00           H
ATOM   4181  C   GLN A 559      56.790  -5.290  92.620  1.00  0.00           C
ATOM   4182  O   GLN A 559      57.320  -6.200  93.230  1.00  0.00           O
ATOM   4183  N   ARG A 560      56.370  -5.600  91.370  1.00  0.00           N
ATOM   4184  H   ARG A 560      55.960  -4.850  90.840  1.00  0.00           H
ATOM   4185  CA  ARG A 560      56.290  -7.020  90.880  1.00  0.00           C
ATOM   4186  HA  ARG A 560      55.640  -7.640  91.490  1.00  0.00           H
ATOM   4187  CB  ARG A 560      55.530  -6.930  89.570  1.00  0.00           C
ATOM   4188  HB1 ARG A 560      56.140  -6.460  88.800  1.00  0.00           H
ATOM   4189  HB2 ARG A 560      54.640  -6.300  89.580  1.00  0.00           H
ATOM   4190  CG  ARG A 560      55.130  -8.350  89.130  1.00  0.00           C
ATOM   4191  HG1 ARG A 560      54.640  -8.830  89.970  1.00  0.00           H
ATOM   4192  HG2 ARG A 560      56.010  -8.980  88.970  1.00  0.00           H
ATOM   4193  CD  ARG A 560      54.470  -8.400  87.690  1.00  0.00           C
ATOM   4194  HD1 ARG A 560      54.120  -9.430  87.630  1.00  0.00           H
ATOM   4195  HD2 ARG A 560      55.150  -8.100  86.890  1.00  0.00           H
ATOM   4196  NE  ARG A 560      53.280  -7.500  87.590  1.00  0.00           N
ATOM   4197  HE  ARG A 560      52.800  -7.330  88.470  1.00  0.00           H
ATOM   4198  CZ  ARG A 560      52.710  -7.010  86.540  1.00  0.00           C
ATOM   4199  NH1 ARG A 560      53.400  -7.010  85.440  1.00  0.00           N
ATOM   4200 1HH1 ARG A 560      54.130  -7.700  85.270  1.00  0.00           H
ATOM   4201 2HH1 ARG A 560      53.110  -6.480  84.630  1.00  0.00           H
ATOM   4202  NH2 ARG A 560      51.620  -6.330  86.630  1.00  0.00           N
ATOM   4203 1HH2 ARG A 560      51.140  -6.100  87.490  1.00  0.00           H
ATOM   4204 2HH2 ARG A 560      51.270  -5.920  85.780  1.00  0.00           H
ATOM   4205  C   ARG A 560      57.680  -7.470  90.790  1.00  0.00           C
ATOM   4206  O   ARG A 560      58.600  -6.670  90.450  1.00  0.00           O
ATOM   4207  N   ALA A 561      57.990  -8.610  91.330  1.00  0.00           N
ATOM   4208  H   ALA A 561      57.260  -9.030  91.880  1.00  0.00           H
ATOM   4209  CA  ALA A 561      59.380  -9.010  91.490  1.00  0.00           C
ATOM   4210  HA  ALA A 561      59.950  -8.220  91.990  1.00  0.00           H
ATOM   4211  CB  ALA A 561      59.520 -10.230  92.500  1.00  0.00           C
ATOM   4212  HB1 ALA A 561      59.090 -10.020  93.480  1.00  0.00           H
ATOM   4213  HB2 ALA A 561      58.900 -11.060  92.170  1.00  0.00           H
ATOM   4214  HB3 ALA A 561      60.550 -10.510  92.690  1.00  0.00           H
ATOM   4215  C   ALA A 561      60.150  -9.330  90.180  1.00  0.00           C
ATOM   4216  O   ALA A 561      59.530  -9.350  89.070  1.00  0.00           O
ATOM   4217  N   THR A 562      61.510  -9.530  90.220  1.00  0.00           N
ATOM   4218  H   THR A 562      61.960  -9.320  91.110  1.00  0.00           H
ATOM   4219  CA  THR A 562      62.440  -9.870  89.100  1.00  0.00           C
ATOM   4220  HA  THR A 562      61.900  -9.660  88.180  1.00  0.00           H
ATOM   4221  CB  THR A 562      63.630  -8.850  89.020  1.00  0.00           C
ATOM   4222  HB  THR A 562      64.180  -9.110  88.110  1.00  0.00           H
ATOM   4223  CG2 THR A 562      63.140  -7.400  88.880  1.00  0.00           C
ATOM   4224 1HG2 THR A 562      62.640  -7.330  87.910  1.00  0.00           H
ATOM   4225 2HG2 THR A 562      62.460  -7.040  89.660  1.00  0.00           H
ATOM   4226 3HG2 THR A 562      64.000  -6.740  88.820  1.00  0.00           H
ATOM   4227  OG1 THR A 562      64.480  -9.020  90.190  1.00  0.00           O
ATOM   4228  HG1 THR A 562      63.890  -8.710  90.880  1.00  0.00           H
ATOM   4229  C   THR A 562      62.890 -11.290  89.000  1.00  0.00           C
ATOM   4230  O   THR A 562      63.080 -12.040  89.980  1.00  0.00           O
ATOM   4231  N   ALA A 563      63.010 -11.760  87.740  1.00  0.00           N
ATOM   4232  H   ALA A 563      62.840 -11.130  86.970  1.00  0.00           H
ATOM   4233  CA  ALA A 563      63.410 -13.160  87.470  1.00  0.00           C
ATOM   4234  HA  ALA A 563      62.580 -13.780  87.800  1.00  0.00           H
ATOM   4235  CB  ALA A 563      63.490 -13.290  85.920  1.00  0.00           C
ATOM   4236  HB1 ALA A 563      64.320 -12.680  85.570  1.00  0.00           H
ATOM   4237  HB2 ALA A 563      63.870 -14.300  85.740  1.00  0.00           H
ATOM   4238  HB3 ALA A 563      62.550 -13.030  85.450  1.00  0.00           H
ATOM   4239  C   ALA A 563      64.690 -13.590  88.360  1.00  0.00           C
ATOM   4240  O   ALA A 563      64.550 -14.630  89.030  1.00  0.00           O
ATOM   4241  N   ALA A 564      65.750 -12.760  88.460  1.00  0.00           N
ATOM   4242  H   ALA A 564      65.840 -11.960  87.850  1.00  0.00           H
ATOM   4243  CA  ALA A 564      66.920 -13.240  89.190  1.00  0.00           C
ATOM   4244  HA  ALA A 564      67.050 -14.300  88.940  1.00  0.00           H
ATOM   4245  CB  ALA A 564      68.090 -12.500  88.540  1.00  0.00           C
ATOM   4246  HB1 ALA A 564      68.140 -11.470  88.890  1.00  0.00           H
ATOM   4247  HB2 ALA A 564      69.020 -12.960  88.860  1.00  0.00           H
ATOM   4248  HB3 ALA A 564      68.000 -12.330  87.470  1.00  0.00           H
ATOM   4249  C   ALA A 564      66.860 -13.160  90.700  1.00  0.00           C
ATOM   4250  O   ALA A 564      67.750 -13.680  91.380  1.00  0.00           O
ATOM   4251  N   GLU A 565      65.850 -12.470  91.190  1.00  0.00           N
ATOM   4252  H   GLU A 565      65.260 -11.990  90.530  1.00  0.00           H
ATOM   4253  CA  GLU A 565      65.530 -12.380  92.660  1.00  0.00           C
ATOM   4254  HA  GLU A 565      66.430 -12.630  93.220  1.00  0.00           H
ATOM   4255  CB  GLU A 565      65.100 -10.930  93.040  1.00  0.00           C
ATOM   4256  HB1 GLU A 565      65.560 -10.290  92.290  1.00  0.00           H
ATOM   4257  HB2 GLU A 565      65.510 -10.700  94.030  1.00  0.00           H
ATOM   4258  CG  GLU A 565      63.560 -10.750  93.020  1.00  0.00           C
ATOM   4259  HG1 GLU A 565      62.950 -11.350  93.700  1.00  0.00           H
ATOM   4260  HG2 GLU A 565      63.120 -10.880  92.040  1.00  0.00           H
ATOM   4261  CD  GLU A 565      63.240  -9.350  93.540  1.00  0.00           C
ATOM   4262  OE1 GLU A 565      63.430  -9.080  94.720  1.00  0.00           O
ATOM   4263  OE2 GLU A 565      62.760  -8.560  92.700  1.00  0.00           O
ATOM   4264  C   GLU A 565      64.570 -13.500  93.000  1.00  0.00           C
ATOM   4265  O   GLU A 565      64.900 -14.290  93.920  1.00  0.00           O
ATOM   4266  N   LEU A 566      63.540 -13.820  92.130  1.00  0.00           N
ATOM   4267  H   LEU A 566      63.430 -13.180  91.350  1.00  0.00           H
ATOM   4268  CA  LEU A 566      62.640 -14.950  92.390  1.00  0.00           C
ATOM   4269  HA  LEU A 566      62.190 -14.850  93.380  1.00  0.00           H
ATOM   4270  CB  LEU A 566      61.550 -14.910  91.280  1.00  0.00           C
ATOM   4271  HB1 LEU A 566      61.100 -15.900  91.290  1.00  0.00           H
ATOM   4272  HB2 LEU A 566      62.060 -14.740  90.330  1.00  0.00           H
ATOM   4273  CG  LEU A 566      60.510 -13.850  91.410  1.00  0.00           C
ATOM   4274  HG  LEU A 566      60.940 -12.910  91.740  1.00  0.00           H
ATOM   4275  CD1 LEU A 566      59.800 -13.620  90.100  1.00  0.00           C
ATOM   4276 1HD1 LEU A 566      60.570 -13.130  89.520  1.00  0.00           H
ATOM   4277 2HD1 LEU A 566      59.530 -14.600  89.700  1.00  0.00           H
ATOM   4278 3HD1 LEU A 566      58.990 -12.890  90.180  1.00  0.00           H
ATOM   4279  CD2 LEU A 566      59.560 -14.310  92.500  1.00  0.00           C
ATOM   4280 1HD2 LEU A 566      58.950 -15.070  92.020  1.00  0.00           H
ATOM   4281 2HD2 LEU A 566      60.070 -14.670  93.390  1.00  0.00           H
ATOM   4282 3HD2 LEU A 566      58.970 -13.400  92.620  1.00  0.00           H
ATOM   4283  C   LEU A 566      63.390 -16.270  92.380  1.00  0.00           C
ATOM   4284  O   LEU A 566      63.020 -17.160  93.170  1.00  0.00           O
ATOM   4285  N   LEU A 567      64.490 -16.440  91.540  1.00  0.00           N
ATOM   4286  H   LEU A 567      64.660 -15.770  90.800  1.00  0.00           H
ATOM   4287  CA  LEU A 567      65.370 -17.610  91.570  1.00  0.00           C
ATOM   4288  HA  LEU A 567      64.880 -18.530  91.260  1.00  0.00           H
ATOM   4289  CB  LEU A 567      66.630 -17.340  90.700  1.00  0.00           C
ATOM   4290  HB1 LEU A 567      67.400 -18.000  91.110  1.00  0.00           H
ATOM   4291  HB2 LEU A 567      66.940 -16.290  90.740  1.00  0.00           H
ATOM   4292  CG  LEU A 567      66.410 -17.740  89.250  1.00  0.00           C
ATOM   4293  HG  LEU A 567      65.630 -17.120  88.830  1.00  0.00           H
ATOM   4294  CD1 LEU A 567      67.680 -17.520  88.400  1.00  0.00           C
ATOM   4295 1HD1 LEU A 567      67.610 -17.770  87.340  1.00  0.00           H
ATOM   4296 2HD1 LEU A 567      68.040 -16.500  88.510  1.00  0.00           H
ATOM   4297 3HD1 LEU A 567      68.500 -18.060  88.880  1.00  0.00           H
ATOM   4298  CD2 LEU A 567      65.940 -19.180  89.050  1.00  0.00           C
ATOM   4299 1HD2 LEU A 567      66.580 -19.810  89.680  1.00  0.00           H
ATOM   4300 2HD2 LEU A 567      64.890 -19.230  89.340  1.00  0.00           H
ATOM   4301 3HD2 LEU A 567      66.040 -19.470  88.000  1.00  0.00           H
ATOM   4302  C   LEU A 567      65.960 -17.860  92.990  1.00  0.00           C
ATOM   4303  O   LEU A 567      66.330 -19.020  93.280  1.00  0.00           O
ATOM   4304  N   LYS A 568      66.130 -16.910  93.960  1.00  0.00           N
ATOM   4305  H   LYS A 568      65.840 -15.960  93.780  1.00  0.00           H
ATOM   4306  CA  LYS A 568      66.680 -17.120  95.310  1.00  0.00           C
ATOM   4307  HA  LYS A 568      67.060 -18.130  95.440  1.00  0.00           H
ATOM   4308  CB  LYS A 568      67.750 -16.150  95.670  1.00  0.00           C
ATOM   4309  HB1 LYS A 568      67.960 -16.380  96.710  1.00  0.00           H
ATOM   4310  HB2 LYS A 568      67.480 -15.100  95.560  1.00  0.00           H
ATOM   4311  CG  LYS A 568      69.160 -16.360  95.000  1.00  0.00           C
ATOM   4312  HG1 LYS A 568      68.960 -16.580  93.950  1.00  0.00           H
ATOM   4313  HG2 LYS A 568      69.540 -17.300  95.390  1.00  0.00           H
ATOM   4314  CD  LYS A 568      70.130 -15.180  95.130  1.00  0.00           C
ATOM   4315  HD1 LYS A 568      69.640 -14.270  94.770  1.00  0.00           H
ATOM   4316  HD2 LYS A 568      70.980 -15.400  94.480  1.00  0.00           H
ATOM   4317  CE  LYS A 568      70.730 -14.900  96.540  1.00  0.00           C
ATOM   4318  HE1 LYS A 568      69.850 -14.740  97.160  1.00  0.00           H
ATOM   4319  HE2 LYS A 568      71.300 -13.970  96.580  1.00  0.00           H
ATOM   4320  NZ  LYS A 568      71.660 -15.950  97.090  1.00  0.00           N
ATOM   4321  HZ1 LYS A 568      72.100 -15.760  97.970  1.00  0.00           H
ATOM   4322  HZ2 LYS A 568      71.160 -16.830  97.110  1.00  0.00           H
ATOM   4323  HZ3 LYS A 568      72.450 -16.100  96.470  1.00  0.00           H
ATOM   4324  C   LYS A 568      65.620 -16.980  96.440  1.00  0.00           C
ATOM   4325  O   LYS A 568      65.920 -16.770  97.640  1.00  0.00           O
ATOM   4326  N   HIS A 569      64.350 -17.170  96.080  1.00  0.00           N
ATOM   4327  H   HIS A 569      64.190 -17.270  95.090  1.00  0.00           H
ATOM   4328  CA  HIS A 569      63.220 -17.240  96.970  1.00  0.00           C
ATOM   4329  HA  HIS A 569      63.300 -16.340  97.590  1.00  0.00           H
ATOM   4330  CB  HIS A 569      62.000 -17.090  96.030  1.00  0.00           C
ATOM   4331  HB1 HIS A 569      61.820 -17.920  95.340  1.00  0.00           H
ATOM   4332  HB2 HIS A 569      62.070 -16.210  95.400  1.00  0.00           H
ATOM   4333  CG  HIS A 569      60.730 -16.820  96.710  1.00  0.00           C
ATOM   4334  ND1 HIS A 569      59.970 -17.790  97.380  1.00  0.00           N
ATOM   4335  CE1 HIS A 569      59.010 -17.150  98.030  1.00  0.00           C
ATOM   4336  HE1 HIS A 569      58.350 -17.670  98.720  1.00  0.00           H
ATOM   4337  NE2 HIS A 569      59.020 -15.810  97.780  1.00  0.00           N
ATOM   4338  HE2 HIS A 569      58.350 -15.140  98.140  1.00  0.00           H
ATOM   4339  CD2 HIS A 569      60.040 -15.610  96.830  1.00  0.00           C
ATOM   4340  HD2 HIS A 569      60.490 -14.700  96.480  1.00  0.00           H
ATOM   4341  C   HIS A 569      63.050 -18.480  97.780  1.00  0.00           C
ATOM   4342  O   HIS A 569      63.410 -19.470  97.200  1.00  0.00           O
ATOM   4343  N   PRO A 570      62.500 -18.510  98.970  1.00  0.00           N
ATOM   4344  CD  PRO A 570      62.220 -17.400  99.860  1.00  0.00           C
ATOM   4345  HD1 PRO A 570      61.270 -16.910  99.650  1.00  0.00           H
ATOM   4346  HD2 PRO A 570      62.970 -16.620  99.690  1.00  0.00           H
ATOM   4347  CG  PRO A 570      62.390 -17.850 101.280  1.00  0.00           C
ATOM   4348  HG1 PRO A 570      61.910 -17.270 102.070  1.00  0.00           H
ATOM   4349  HG2 PRO A 570      63.440 -18.020 101.510  1.00  0.00           H
ATOM   4350  CB  PRO A 570      61.750 -19.210 101.140  1.00  0.00           C
ATOM   4351  HB1 PRO A 570      60.690 -19.020 101.000  1.00  0.00           H
ATOM   4352  HB2 PRO A 570      61.890 -19.920 101.960  1.00  0.00           H
ATOM   4353  CA  PRO A 570      62.310 -19.690  99.800  1.00  0.00           C
ATOM   4354  HA  PRO A 570      63.320 -20.040 100.040  1.00  0.00           H
ATOM   4355  C   PRO A 570      61.420 -20.850  99.280  1.00  0.00           C
ATOM   4356  O   PRO A 570      61.590 -22.010  99.700  1.00  0.00           O
ATOM   4357  N   PHE A 571      60.480 -20.610  98.390  1.00  0.00           N
ATOM   4358  H   PHE A 571      60.370 -19.610  98.280  1.00  0.00           H
ATOM   4359  CA  PHE A 571      59.580 -21.620  97.790  1.00  0.00           C
ATOM   4360  HA  PHE A 571      59.100 -22.230  98.550  1.00  0.00           H
ATOM   4361  CB  PHE A 571      58.430 -21.010  97.010  1.00  0.00           C
ATOM   4362  HB1 PHE A 571      58.890 -20.280  96.340  1.00  0.00           H
ATOM   4363  HB2 PHE A 571      57.760 -20.460  97.670  1.00  0.00           H
ATOM   4364  CG  PHE A 571      57.650 -21.980  96.140  1.00  0.00           C
ATOM   4365  CD1 PHE A 571      57.210 -23.190  96.690  1.00  0.00           C
ATOM   4366  HD1 PHE A 571      57.040 -23.280  97.750  1.00  0.00           H
ATOM   4367  CE1 PHE A 571      56.640 -24.150  95.820  1.00  0.00           C
ATOM   4368  HE1 PHE A 571      56.170 -24.940  96.390  1.00  0.00           H
ATOM   4369  CZ  PHE A 571      56.630 -24.010  94.400  1.00  0.00           C
ATOM   4370  HZ  PHE A 571      56.240 -24.790  93.760  1.00  0.00           H
ATOM   4371  CE2 PHE A 571      57.210 -22.870  93.840  1.00  0.00           C
ATOM   4372  HE2 PHE A 571      57.330 -22.740  92.770  1.00  0.00           H
ATOM   4373  CD2 PHE A 571      57.660 -21.820  94.700  1.00  0.00           C
ATOM   4374  HD2 PHE A 571      57.940 -20.860  94.280  1.00  0.00           H
ATOM   4375  C   PHE A 571      60.380 -22.470  96.850  1.00  0.00           C
ATOM   4376  O   PHE A 571      60.110 -23.660  96.780  1.00  0.00           O
ATOM   4377  N   LEU A 572      61.450 -21.930  96.190  1.00  0.00           N
ATOM   4378  H   LEU A 572      61.670 -20.970  96.440  1.00  0.00           H
ATOM   4379  CA  LEU A 572      62.280 -22.680  95.410  1.00  0.00           C
ATOM   4380  HA  LEU A 572      61.790 -23.450  94.810  1.00  0.00           H
ATOM   4381  CB  LEU A 572      62.970 -21.810  94.360  1.00  0.00           C
ATOM   4382  HB1 LEU A 572      63.640 -22.480  93.820  1.00  0.00           H
ATOM   4383  HB2 LEU A 572      63.550 -20.980  94.770  1.00  0.00           H
ATOM   4384  CG  LEU A 572      62.030 -21.030  93.420  1.00  0.00           C
ATOM   4385  HG  LEU A 572      61.640 -20.150  93.940  1.00  0.00           H
ATOM   4386  CD1 LEU A 572      62.870 -20.480  92.260  1.00  0.00           C
ATOM   4387 1HD1 LEU A 572      63.060 -21.370  91.660  1.00  0.00           H
ATOM   4388 2HD1 LEU A 572      62.340 -19.730  91.680  1.00  0.00           H
ATOM   4389 3HD1 LEU A 572      63.810 -20.050  92.620  1.00  0.00           H
ATOM   4390  CD2 LEU A 572      60.800 -21.800  92.910  1.00  0.00           C
ATOM   4391 1HD2 LEU A 572      60.190 -21.160  92.270  1.00  0.00           H
ATOM   4392 2HD2 LEU A 572      61.120 -22.720  92.420  1.00  0.00           H
ATOM   4393 3HD2 LEU A 572      60.220 -22.160  93.770  1.00  0.00           H
ATOM   4394  C   LEU A 572      63.340 -23.570  96.110  1.00  0.00           C
ATOM   4395  O   LEU A 572      64.060 -24.330  95.450  1.00  0.00           O
ATOM   4396  N   ALA A 573      63.530 -23.370  97.390  1.00  0.00           N
ATOM   4397  H   ALA A 573      62.890 -22.820  97.950  1.00  0.00           H
ATOM   4398  CA  ALA A 573      64.770 -23.880  98.110  1.00  0.00           C
ATOM   4399  HA  ALA A 573      65.660 -23.800  97.480  1.00  0.00           H
ATOM   4400  CB  ALA A 573      65.170 -23.000  99.290  1.00  0.00           C
ATOM   4401  HB1 ALA A 573      65.810 -23.530 100.000  1.00  0.00           H
ATOM   4402  HB2 ALA A 573      65.780 -22.170  98.960  1.00  0.00           H
ATOM   4403  HB3 ALA A 573      64.260 -22.770  99.840  1.00  0.00           H
ATOM   4404  C   ALA A 573      64.600 -25.390  98.420  1.00  0.00           C
ATOM   4405  O   ALA A 573      65.330 -26.060  99.130  1.00  0.00           O
ATOM   4406  N   LYS A 574      63.550 -26.010  97.890  1.00  0.00           N
ATOM   4407  H   LYS A 574      62.860 -25.420  97.460  1.00  0.00           H
ATOM   4408  CA  LYS A 574      63.140 -27.390  98.110  1.00  0.00           C
ATOM   4409  HA  LYS A 574      64.020 -27.940  98.450  1.00  0.00           H
ATOM   4410  CB  LYS A 574      61.960 -27.430  99.090  1.00  0.00           C
ATOM   4411  HB1 LYS A 574      62.250 -26.980 100.030  1.00  0.00           H
ATOM   4412  HB2 LYS A 574      61.700 -28.460  99.360  1.00  0.00           H
ATOM   4413  CG  LYS A 574      60.750 -26.600  98.620  1.00  0.00           C
ATOM   4414  HG1 LYS A 574      60.400 -26.980  97.660  1.00  0.00           H
ATOM   4415  HG2 LYS A 574      60.940 -25.540  98.460  1.00  0.00           H
ATOM   4416  CD  LYS A 574      59.610 -26.520  99.640  1.00  0.00           C
ATOM   4417  HD1 LYS A 574      59.900 -26.080 100.590  1.00  0.00           H
ATOM   4418  HD2 LYS A 574      59.390 -27.560  99.890  1.00  0.00           H
ATOM   4419  CE  LYS A 574      58.440 -25.740  99.120  1.00  0.00           C
ATOM   4420  HE1 LYS A 574      58.330 -26.030  98.080  1.00  0.00           H
ATOM   4421  HE2 LYS A 574      58.620 -24.670  99.220  1.00  0.00           H
ATOM   4422  NZ  LYS A 574      57.230 -26.120  99.880  1.00  0.00           N
ATOM   4423  HZ1 LYS A 574      57.260 -25.880 100.860  1.00  0.00           H
ATOM   4424  HZ2 LYS A 574      56.380 -25.820  99.420  1.00  0.00           H
ATOM   4425  HZ3 LYS A 574      57.190 -27.130  99.970  1.00  0.00           H
ATOM   4426  C   LYS A 574      62.950 -28.120  96.770  1.00  0.00           C
ATOM   4427  O   LYS A 574      62.480 -29.240  96.700  1.00  0.00           O
ATOM   4428  N   ALA A 575      63.340 -27.490  95.660  1.00  0.00           N
ATOM   4429  H   ALA A 575      63.810 -26.600  95.750  1.00  0.00           H
ATOM   4430  CA  ALA A 575      63.070 -27.900  94.310  1.00  0.00           C
ATOM   4431  HA  ALA A 575      62.020 -27.900  94.020  1.00  0.00           H
ATOM   4432  CB  ALA A 575      63.660 -26.960  93.370  1.00  0.00           C
ATOM   4433  HB1 ALA A 575      64.750 -26.890  93.420  1.00  0.00           H
ATOM   4434  HB2 ALA A 575      63.470 -27.360  92.370  1.00  0.00           H
ATOM   4435  HB3 ALA A 575      63.280 -25.950  93.480  1.00  0.00           H
ATOM   4436  C   ALA A 575      63.630 -29.350  94.010  1.00  0.00           C
ATOM   4437  O   ALA A 575      64.820 -29.660  94.390  1.00  0.00           O
ATOM   4438  N   GLY A 576      62.820 -30.190  93.500  1.00  0.00           N
ATOM   4439  H   GLY A 576      61.880 -29.910  93.260  1.00  0.00           H
ATOM   4440  CA  GLY A 576      63.170 -31.590  93.280  1.00  0.00           C
ATOM   4441  HA1 GLY A 576      62.230 -32.030  92.940  1.00  0.00           H
ATOM   4442  HA2 GLY A 576      63.500 -32.050  94.210  1.00  0.00           H
ATOM   4443  C   GLY A 576      64.170 -31.750  92.100  1.00  0.00           C
ATOM   4444  O   GLY A 576      64.150 -30.860  91.190  1.00  0.00           O
ATOM   4445  N   PRO A 577      65.110 -32.730  92.100  1.00  0.00           N
ATOM   4446  CD  PRO A 577      65.280 -33.810  93.030  1.00  0.00           C
ATOM   4447  HD1 PRO A 577      64.320 -34.000  93.510  1.00  0.00           H
ATOM   4448  HD2 PRO A 577      66.050 -33.500  93.740  1.00  0.00           H
ATOM   4449  CG  PRO A 577      65.870 -34.980  92.310  1.00  0.00           C
ATOM   4450  HG1 PRO A 577      64.990 -35.490  91.910  1.00  0.00           H
ATOM   4451  HG2 PRO A 577      66.580 -35.590  92.860  1.00  0.00           H
ATOM   4452  CB  PRO A 577      66.670 -34.260  91.260  1.00  0.00           C
ATOM   4453  HB1 PRO A 577      66.840 -34.880  90.380  1.00  0.00           H
ATOM   4454  HB2 PRO A 577      67.650 -33.900  91.570  1.00  0.00           H
ATOM   4455  CA  PRO A 577      65.890 -33.000  90.890  1.00  0.00           C
ATOM   4456  HA  PRO A 577      66.520 -32.130  90.790  1.00  0.00           H
ATOM   4457  C   PRO A 577      65.000 -33.370  89.630  1.00  0.00           C
ATOM   4458  O   PRO A 577      64.020 -34.140  89.770  1.00  0.00           O
ATOM   4459  N   PRO A 578      65.240 -32.900  88.380  1.00  0.00           N
ATOM   4460  CD  PRO A 578      66.430 -32.190  87.930  1.00  0.00           C
ATOM   4461  HD1 PRO A 578      67.240 -32.850  87.610  1.00  0.00           H
ATOM   4462  HD2 PRO A 578      66.810 -31.470  88.650  1.00  0.00           H
ATOM   4463  CG  PRO A 578      66.100 -31.360  86.690  1.00  0.00           C
ATOM   4464  HG1 PRO A 578      66.900 -31.070  86.010  1.00  0.00           H
ATOM   4465  HG2 PRO A 578      65.610 -30.440  87.030  1.00  0.00           H
ATOM   4466  CB  PRO A 578      64.950 -32.170  86.100  1.00  0.00           C
ATOM   4467  HB1 PRO A 578      65.320 -32.960  85.440  1.00  0.00           H
ATOM   4468  HB2 PRO A 578      64.270 -31.500  85.580  1.00  0.00           H
ATOM   4469  CA  PRO A 578      64.230 -32.790  87.290  1.00  0.00           C
ATOM   4470  HA  PRO A 578      63.540 -31.990  87.510  1.00  0.00           H
ATOM   4471  C   PRO A 578      63.400 -34.000  86.870  1.00  0.00           C
ATOM   4472  O   PRO A 578      62.150 -33.830  86.690  1.00  0.00           O
ATOM   4473  N   ALA A 579      63.910 -35.230  86.890  1.00  0.00           N
ATOM   4474  H   ALA A 579      64.860 -35.290  87.240  1.00  0.00           H
ATOM   4475  CA  ALA A 579      63.220 -36.430  86.450  1.00  0.00           C
ATOM   4476  HA  ALA A 579      62.930 -36.320  85.410  1.00  0.00           H
ATOM   4477  CB  ALA A 579      64.280 -37.610  86.410  1.00  0.00           C
ATOM   4478  HB1 ALA A 579      63.800 -38.590  86.370  1.00  0.00           H
ATOM   4479  HB2 ALA A 579      65.010 -37.510  85.610  1.00  0.00           H
ATOM   4480  HB3 ALA A 579      64.820 -37.540  87.360  1.00  0.00           H
ATOM   4481  C   ALA A 579      62.010 -36.800  87.350  1.00  0.00           C
ATOM   4482  O   ALA A 579      61.250 -37.720  86.990  1.00  0.00           O
ATOM   4483  N   SER A 580      61.930 -36.180  88.530  1.00  0.00           N
ATOM   4484  H   SER A 580      62.630 -35.500  88.780  1.00  0.00           H
ATOM   4485  CA  SER A 580      60.920 -36.310  89.600  1.00  0.00           C
ATOM   4486  HA  SER A 580      60.820 -37.400  89.610  1.00  0.00           H
ATOM   4487  CB  SER A 580      61.410 -35.820  90.930  1.00  0.00           C
ATOM   4488  HB1 SER A 580      62.340 -36.330  91.170  1.00  0.00           H
ATOM   4489  HB2 SER A 580      60.710 -36.190  91.680  1.00  0.00           H
ATOM   4490  OG  SER A 580      61.740 -34.430  90.910  1.00  0.00           O
ATOM   4491  HG  SER A 580      62.570 -34.240  90.470  1.00  0.00           H
ATOM   4492  C   SER A 580      59.530 -35.870  89.120  1.00  0.00           C
ATOM   4493  O   SER A 580      58.610 -35.790  89.920  1.00  0.00           O
ATOM   4494  N   ILE A 581      59.340 -35.500  87.830  1.00  0.00           N
ATOM   4495  H   ILE A 581      60.170 -35.470  87.260  1.00  0.00           H
ATOM   4496  CA  ILE A 581      58.020 -35.210  87.190  1.00  0.00           C
ATOM   4497  HA  ILE A 581      57.270 -35.130  87.990  1.00  0.00           H
ATOM   4498  CB  ILE A 581      57.990 -33.840  86.380  1.00  0.00           C
ATOM   4499  HB  ILE A 581      56.970 -33.660  86.040  1.00  0.00           H
ATOM   4500  CG2 ILE A 581      58.350 -32.570  87.200  1.00  0.00           C
ATOM   4501 1HG2 ILE A 581      59.360 -32.670  87.590  1.00  0.00           H
ATOM   4502 2HG2 ILE A 581      58.200 -31.650  86.640  1.00  0.00           H
ATOM   4503 3HG2 ILE A 581      57.680 -32.520  88.060  1.00  0.00           H
ATOM   4504  CG1 ILE A 581      58.980 -33.860  85.180  1.00  0.00           C
ATOM   4505 1HG1 ILE A 581      58.860 -34.750  84.560  1.00  0.00           H
ATOM   4506 2HG1 ILE A 581      60.030 -33.790  85.470  1.00  0.00           H
ATOM   4507  CD  ILE A 581      58.760 -32.680  84.280  1.00  0.00           C
ATOM   4508  HD1 ILE A 581      57.740 -32.410  84.010  1.00  0.00           H
ATOM   4509  HD2 ILE A 581      59.280 -31.830  84.720  1.00  0.00           H
ATOM   4510  HD3 ILE A 581      59.320 -32.910  83.370  1.00  0.00           H
ATOM   4511  C   ILE A 581      57.600 -36.450  86.350  1.00  0.00           C
ATOM   4512  O   ILE A 581      56.450 -36.570  85.940  1.00  0.00           O
ATOM   4513  N   VAL A 582      58.550 -37.330  86.000  1.00  0.00           N
ATOM   4514  H   VAL A 582      59.440 -37.240  86.480  1.00  0.00           H
ATOM   4515  CA  VAL A 582      58.330 -38.500  85.090  1.00  0.00           C
ATOM   4516  HA  VAL A 582      57.700 -38.170  84.260  1.00  0.00           H
ATOM   4517  CB  VAL A 582      59.590 -39.040  84.460  1.00  0.00           C
ATOM   4518  HB  VAL A 582      60.180 -39.520  85.240  1.00  0.00           H
ATOM   4519  CG1 VAL A 582      59.340 -40.060  83.310  1.00  0.00           C
ATOM   4520 1HG1 VAL A 582      59.080 -39.490  82.410  1.00  0.00           H
ATOM   4521 2HG1 VAL A 582      60.200 -40.670  83.030  1.00  0.00           H
ATOM   4522 3HG1 VAL A 582      58.690 -40.900  83.560  1.00  0.00           H
ATOM   4523  CG2 VAL A 582      60.420 -37.930  83.790  1.00  0.00           C
ATOM   4524 1HG2 VAL A 582      60.930 -37.310  84.530  1.00  0.00           H
ATOM   4525 2HG2 VAL A 582      61.160 -38.480  83.210  1.00  0.00           H
ATOM   4526 3HG2 VAL A 582      59.950 -37.290  83.050  1.00  0.00           H
ATOM   4527  C   VAL A 582      57.670 -39.750  85.830  1.00  0.00           C
ATOM   4528  O   VAL A 582      56.900 -40.440  85.220  1.00  0.00           O
ATOM   4529  N   PRO A 583      57.760 -39.910  87.150  1.00  0.00           N
ATOM   4530  CD  PRO A 583      58.870 -39.760  88.030  1.00  0.00           C
ATOM   4531  HD1 PRO A 583      58.810 -38.790  88.530  1.00  0.00           H
ATOM   4532  HD2 PRO A 583      59.820 -39.810  87.500  1.00  0.00           H
ATOM   4533  CG  PRO A 583      58.640 -40.770  89.090  1.00  0.00           C
ATOM   4534  HG1 PRO A 583      59.050 -40.430  90.040  1.00  0.00           H
ATOM   4535  HG2 PRO A 583      59.060 -41.730  88.800  1.00  0.00           H
ATOM   4536  CB  PRO A 583      57.130 -40.890  89.250  1.00  0.00           C
ATOM   4537  HB1 PRO A 583      56.850 -40.080  89.940  1.00  0.00           H
ATOM   4538  HB2 PRO A 583      56.840 -41.850  89.670  1.00  0.00           H
ATOM   4539  CA  PRO A 583      56.670 -40.690  87.810  1.00  0.00           C
ATOM   4540  HA  PRO A 583      56.700 -41.640  87.270  1.00  0.00           H
ATOM   4541  C   PRO A 583      55.220 -40.250  87.500  1.00  0.00           C
ATOM   4542  O   PRO A 583      54.450 -41.150  87.230  1.00  0.00           O
ATOM   4543  N   LEU A 584      54.880 -38.930  87.380  1.00  0.00           N
ATOM   4544  H   LEU A 584      55.680 -38.310  87.290  1.00  0.00           H
ATOM   4545  CA  LEU A 584      53.530 -38.460  87.130  1.00  0.00           C
ATOM   4546  HA  LEU A 584      52.830 -38.870  87.860  1.00  0.00           H
ATOM   4547  CB  LEU A 584      53.590 -37.020  87.340  1.00  0.00           C
ATOM   4548  HB1 LEU A 584      52.530 -36.750  87.380  1.00  0.00           H
ATOM   4549  HB2 LEU A 584      53.970 -36.390  86.530  1.00  0.00           H
ATOM   4550  CG  LEU A 584      54.160 -36.560  88.700  1.00  0.00           C
ATOM   4551  HG  LEU A 584      55.200 -36.870  88.800  1.00  0.00           H
ATOM   4552  CD1 LEU A 584      54.280 -35.050  88.680  1.00  0.00           C
ATOM   4553 1HD1 LEU A 584      54.850 -34.630  89.510  1.00  0.00           H
ATOM   4554 2HD1 LEU A 584      54.750 -34.610  87.790  1.00  0.00           H
ATOM   4555 3HD1 LEU A 584      53.300 -34.600  88.820  1.00  0.00           H
ATOM   4556  CD2 LEU A 584      53.390 -37.000  89.900  1.00  0.00           C
ATOM   4557 1HD2 LEU A 584      52.310 -37.020  89.770  1.00  0.00           H
ATOM   4558 2HD2 LEU A 584      53.740 -37.990  90.190  1.00  0.00           H
ATOM   4559 3HD2 LEU A 584      53.700 -36.410  90.770  1.00  0.00           H
ATOM   4560  C   LEU A 584      53.020 -38.700  85.680  1.00  0.00           C
ATOM   4561  O   LEU A 584      51.830 -38.520  85.450  1.00  0.00           O
ATOM   4562  N   MET A 585      53.780 -39.260  84.750  1.00  0.00           N
ATOM   4563  H   MET A 585      54.760 -39.330  84.980  1.00  0.00           H
ATOM   4564  CA  MET A 585      53.290 -39.810  83.490  1.00  0.00           C
ATOM   4565  HA  MET A 585      52.490 -39.180  83.100  1.00  0.00           H
ATOM   4566  CB  MET A 585      54.490 -39.880  82.510  1.00  0.00           C
ATOM   4567  HB1 MET A 585      53.960 -40.320  81.660  1.00  0.00           H
ATOM   4568  HB2 MET A 585      55.220 -40.610  82.870  1.00  0.00           H
ATOM   4569  CG  MET A 585      55.090 -38.500  82.180  1.00  0.00           C
ATOM   4570  HG1 MET A 585      56.040 -38.860  81.780  1.00  0.00           H
ATOM   4571  HG2 MET A 585      55.450 -38.040  83.100  1.00  0.00           H
ATOM   4572  SD  MET A 585      54.410 -37.380  80.930  1.00  0.00           S
ATOM   4573  CE  MET A 585      55.850 -36.490  80.300  1.00  0.00           C
ATOM   4574  HE1 MET A 585      55.460 -35.790  79.560  1.00  0.00           H
ATOM   4575  HE2 MET A 585      56.310 -36.050  81.180  1.00  0.00           H
ATOM   4576  HE3 MET A 585      56.560 -37.230  79.930  1.00  0.00           H
ATOM   4577  C   MET A 585      52.750 -41.250  83.700  1.00  0.00           C
ATOM   4578  O   MET A 585      52.150 -41.760  82.790  1.00  0.00           O
ATOM   4579  N   ARG A 586      53.060 -41.940  84.850  1.00  0.00           N
ATOM   4580  H   ARG A 586      53.640 -41.450  85.520  1.00  0.00           H
ATOM   4581  CA  ARG A 586      53.000 -43.440  84.960  1.00  0.00           C
ATOM   4582  HA  ARG A 586      52.380 -43.820  84.150  1.00  0.00           H
ATOM   4583  CB  ARG A 586      54.350 -43.980  84.700  1.00  0.00           C
ATOM   4584  HB1 ARG A 586      55.030 -43.460  85.380  1.00  0.00           H
ATOM   4585  HB2 ARG A 586      54.640 -43.650  83.700  1.00  0.00           H
ATOM   4586  CG  ARG A 586      54.570 -45.560  84.620  1.00  0.00           C
ATOM   4587  HG1 ARG A 586      53.950 -45.960  83.820  1.00  0.00           H
ATOM   4588  HG2 ARG A 586      54.290 -46.050  85.550  1.00  0.00           H
ATOM   4589  CD  ARG A 586      55.970 -45.860  84.310  1.00  0.00           C
ATOM   4590  HD1 ARG A 586      56.240 -45.350  83.390  1.00  0.00           H
ATOM   4591  HD2 ARG A 586      56.120 -46.940  84.190  1.00  0.00           H
ATOM   4592  NE  ARG A 586      56.900 -45.420  85.380  1.00  0.00           N
ATOM   4593  HE  ARG A 586      56.970 -46.050  86.170  1.00  0.00           H
ATOM   4594  CZ  ARG A 586      57.700 -44.330  85.430  1.00  0.00           C
ATOM   4595  NH1 ARG A 586      57.850 -43.470  84.520  1.00  0.00           N
ATOM   4596 1HH1 ARG A 586      57.250 -43.490  83.700  1.00  0.00           H
ATOM   4597 2HH1 ARG A 586      58.600 -42.800  84.560  1.00  0.00           H
ATOM   4598  NH2 ARG A 586      58.420 -44.010  86.510  1.00  0.00           N
ATOM   4599 1HH2 ARG A 586      58.060 -44.390  87.380  1.00  0.00           H
ATOM   4600 2HH2 ARG A 586      59.110 -43.280  86.440  1.00  0.00           H
ATOM   4601  C   ARG A 586      52.380 -43.970  86.290  1.00  0.00           C
ATOM   4602  O   ARG A 586      52.130 -45.170  86.270  1.00  0.00           O
ATOM   4603  N   GLN A 587      52.140 -43.110  87.260  1.00  0.00           N
ATOM   4604  H   GLN A 587      52.490 -42.160  87.180  1.00  0.00           H
ATOM   4605  CA  GLN A 587      51.150 -43.340  88.340  1.00  0.00           C
ATOM   4606  HA  GLN A 587      50.490 -44.110  87.940  1.00  0.00           H
ATOM   4607  CB  GLN A 587      51.800 -43.770  89.640  1.00  0.00           C
ATOM   4608  HB1 GLN A 587      52.010 -44.840  89.550  1.00  0.00           H
ATOM   4609  HB2 GLN A 587      51.150 -43.500  90.470  1.00  0.00           H
ATOM   4610  CG  GLN A 587      53.130 -43.050  89.970  1.00  0.00           C
ATOM   4611  HG1 GLN A 587      53.160 -41.990  89.700  1.00  0.00           H
ATOM   4612  HG2 GLN A 587      53.920 -43.650  89.530  1.00  0.00           H
ATOM   4613  CD  GLN A 587      53.320 -43.110  91.450  1.00  0.00           C
ATOM   4614  OE1 GLN A 587      53.480 -42.050  92.120  1.00  0.00           O
ATOM   4615  NE2 GLN A 587      53.380 -44.250  92.070  1.00  0.00           N
ATOM   4616 1HE2 GLN A 587      53.350 -45.100  91.520  1.00  0.00           H
ATOM   4617 2HE2 GLN A 587      53.530 -44.180  93.060  1.00  0.00           H
ATOM   4618  C   GLN A 587      50.290 -42.050  88.460  1.00  0.00           C
ATOM   4619  O   GLN A 587      50.730 -41.030  88.110  1.00  0.00           O
ATOM   4620  N   ASN A 588      49.020 -42.220  88.880  1.00  0.00           N
ATOM   4621  H   ASN A 588      48.710 -43.180  88.960  1.00  0.00           H
ATOM   4622  CA  ASN A 588      48.110 -41.090  89.130  1.00  0.00           C
ATOM   4623  HA  ASN A 588      48.510 -40.260  88.560  1.00  0.00           H
ATOM   4624  CB  ASN A 588      46.730 -41.320  88.460  1.00  0.00           C
ATOM   4625  HB1 ASN A 588      46.440 -42.350  88.700  1.00  0.00           H
ATOM   4626  HB2 ASN A 588      46.830 -41.130  87.390  1.00  0.00           H
ATOM   4627  CG  ASN A 588      45.690 -40.350  88.970  1.00  0.00           C
ATOM   4628  OD1 ASN A 588      44.780 -40.760  89.630  1.00  0.00           O
ATOM   4629  ND2 ASN A 588      45.810 -39.070  88.730  1.00  0.00           N
ATOM   4630 1HD2 ASN A 588      46.560 -38.710  88.160  1.00  0.00           H
ATOM   4631 2HD2 ASN A 588      44.990 -38.510  88.930  1.00  0.00           H
ATOM   4632  C   ASN A 588      48.060 -40.720  90.650  1.00  0.00           C
ATOM   4633  O   ASN A 588      48.080 -41.610  91.580  1.00  0.00           O
ATOM   4634  N   ARG A 589      48.020 -39.420  90.970  1.00  0.00           N
ATOM   4635  H   ARG A 589      47.740 -38.810  90.210  1.00  0.00           H
ATOM   4636  CA  ARG A 589      47.840 -38.850  92.350  1.00  0.00           C
ATOM   4637  HA  ARG A 589      47.540 -39.560  93.110  1.00  0.00           H
ATOM   4638  CB  ARG A 589      49.190 -38.310  92.780  1.00  0.00           C
ATOM   4639  HB1 ARG A 589      49.180 -37.810  93.750  1.00  0.00           H
ATOM   4640  HB2 ARG A 589      49.510 -37.610  92.010  1.00  0.00           H
ATOM   4641  CG  ARG A 589      50.310 -39.430  92.860  1.00  0.00           C
ATOM   4642  HG1 ARG A 589      50.580 -39.920  91.930  1.00  0.00           H
ATOM   4643  HG2 ARG A 589      50.010 -40.250  93.510  1.00  0.00           H
ATOM   4644  CD  ARG A 589      51.610 -38.730  93.360  1.00  0.00           C
ATOM   4645  HD1 ARG A 589      51.340 -38.440  94.370  1.00  0.00           H
ATOM   4646  HD2 ARG A 589      51.840 -37.880  92.720  1.00  0.00           H
ATOM   4647  NE  ARG A 589      52.780 -39.610  93.380  1.00  0.00           N
ATOM   4648  HE  ARG A 589      52.580 -40.590  93.230  1.00  0.00           H
ATOM   4649  CZ  ARG A 589      54.050 -39.300  93.600  1.00  0.00           C
ATOM   4650  NH1 ARG A 589      54.960 -40.230  93.570  1.00  0.00           N
ATOM   4651 1HH1 ARG A 589      54.830 -41.100  93.070  1.00  0.00           H
ATOM   4652 2HH1 ARG A 589      55.920 -39.990  93.750  1.00  0.00           H
ATOM   4653  NH2 ARG A 589      54.470 -38.110  93.980  1.00  0.00           N
ATOM   4654 1HH2 ARG A 589      53.860 -37.340  93.760  1.00  0.00           H
ATOM   4655 2HH2 ARG A 589      55.470 -37.950  94.010  1.00  0.00           H
ATOM   4656  C   ARG A 589      46.720 -37.750  92.340  1.00  0.00           C
ATOM   4657  O   ARG A 589      46.800 -36.740  91.670  1.00  0.00           O
ATOM   4658  N   THR A 590      45.720 -37.980  93.170  1.00  0.00           N
ATOM   4659  H   THR A 590      45.730 -38.810  93.750  1.00  0.00           H
ATOM   4660  CA  THR A 590      44.680 -36.940  93.380  1.00  0.00           C
ATOM   4661  HA  THR A 590      44.470 -36.700  92.330  1.00  0.00           H
ATOM   4662  CB  THR A 590      43.410 -37.490  93.980  1.00  0.00           C
ATOM   4663  HB  THR A 590      42.830 -36.800  94.600  1.00  0.00           H
ATOM   4664  CG2 THR A 590      42.480 -38.070  92.830  1.00  0.00           C
ATOM   4665 1HG2 THR A 590      41.920 -37.220  92.450  1.00  0.00           H
ATOM   4666 2HG2 THR A 590      43.120 -38.580  92.120  1.00  0.00           H
ATOM   4667 3HG2 THR A 590      41.790 -38.750  93.350  1.00  0.00           H
ATOM   4668  OG1 THR A 590      43.820 -38.510  94.860  1.00  0.00           O
ATOM   4669  HG1 THR A 590      43.110 -38.700  95.480  1.00  0.00           H
ATOM   4670  C   THR A 590      45.100 -35.660  94.230  1.00  0.00           C
ATOM   4671  O   THR A 590      46.110 -35.670  94.900  1.00  0.00           O
ATOM   4672  N   ARG A 591      44.300 -34.560  93.990  1.00  0.00           N
ATOM   4673  H   ARG A 591      43.430 -34.700  93.500  1.00  0.00           H
ATOM   4674  CA  ARG A 591      44.420 -33.170  94.600  1.00  0.00           C
ATOM   4675  HA  ARG A 591      45.470 -33.000  94.850  1.00  0.00           H
ATOM   4676  CB  ARG A 591      43.940 -32.080  93.550  1.00  0.00           C
ATOM   4677  HB1 ARG A 591      43.950 -31.140  94.110  1.00  0.00           H
ATOM   4678  HB2 ARG A 591      42.900 -32.230  93.270  1.00  0.00           H
ATOM   4679  CG  ARG A 591      44.830 -31.950  92.280  1.00  0.00           C
ATOM   4680  HG1 ARG A 591      44.790 -32.860  91.690  1.00  0.00           H
ATOM   4681  HG2 ARG A 591      45.840 -31.660  92.560  1.00  0.00           H
ATOM   4682  CD  ARG A 591      44.360 -30.720  91.380  1.00  0.00           C
ATOM   4683  HD1 ARG A 591      43.990 -29.880  91.960  1.00  0.00           H
ATOM   4684  HD2 ARG A 591      43.590 -31.050  90.690  1.00  0.00           H
ATOM   4685  NE  ARG A 591      45.480 -30.210  90.570  1.00  0.00           N
ATOM   4686  HE  ARG A 591      45.930 -29.380  90.930  1.00  0.00           H
ATOM   4687  CZ  ARG A 591      45.930 -30.470  89.470  1.00  0.00           C
ATOM   4688  NH1 ARG A 591      45.650 -31.500  88.700  1.00  0.00           N
ATOM   4689 1HH1 ARG A 591      44.930 -32.130  89.020  1.00  0.00           H
ATOM   4690 2HH1 ARG A 591      46.200 -31.650  87.870  1.00  0.00           H
ATOM   4691  NH2 ARG A 591      46.710 -29.700  88.860  1.00  0.00           N
ATOM   4692 1HH2 ARG A 591      47.050 -28.810  89.190  1.00  0.00           H
ATOM   4693 2HH2 ARG A 591      46.880 -29.970  87.900  1.00  0.00           H
ATOM   4694  C   ARG A 591      43.750 -33.000  95.940  1.00  0.00           C
ATOM   4695  OC1 ARG A 591      42.610 -33.510  96.050  1.00  0.00           O
ATOM   4696  OC2 ARG A 591      44.310 -32.370  96.850  1.00  0.00           O
ATOM   4697  F    5g B 592      53.790 -35.530  68.790  1.00  0.00            
ATOM   4698  C    5g B 592      56.240 -34.240  71.140  1.00  0.00            
ATOM   4699  C1   5g B 592      55.340 -34.340  70.020  1.00  0.00            
ATOM   4700  HC   5g B 592      55.170 -33.470  69.390  1.00  0.00            
ATOM   4701  C2   5g B 592      56.440 -35.400  71.920  1.00  0.00            
ATOM   4702  H1   5g B 592      57.250 -35.420  72.640  1.00  0.00            
ATOM   4703  C3   5g B 592      54.610 -35.490  69.820  1.00  0.00            
ATOM   4704  C4   5g B 592      55.850 -36.640  71.630  1.00  0.00            
ATOM   4705  H2   5g B 592      56.070 -37.540  72.200  1.00  0.00            
ATOM   4706  C5   5g B 592      54.930 -36.690  70.560  1.00  0.00            
ATOM   4707  H3   5g B 592      54.430 -37.600  70.270  1.00  0.00            
ATOM   4708  N    5g B 592      56.910 -33.080  71.370  1.00  0.00            
ATOM   4709  H    5g B 592      57.660 -33.140  72.040  1.00  0.00            
ATOM   4710  C6   5g B 592      56.720 -31.810  70.930  1.00  0.00            
ATOM   4711  N1   5g B 592      55.510 -31.340  70.750  1.00  0.00            
ATOM   4712  C7   5g B 592      55.440 -30.100  70.490  1.00  0.00            
ATOM   4713  C8   5g B 592      56.560 -29.350  70.370  1.00  0.00            
ATOM   4714  C9   5g B 592      57.780 -29.990  70.520  1.00  0.00            
ATOM   4715  C10  5g B 592      56.880 -27.950  70.020  1.00  0.00            
ATOM   4716  H4   5g B 592      56.160 -27.160  69.850  1.00  0.00            
ATOM   4717  N2   5g B 592      58.790 -29.090  70.210  1.00  0.00            
ATOM   4718  N3   5g B 592      57.950 -31.250  70.910  1.00  0.00            
ATOM   4719  C11  5g B 592      58.230 -27.800  69.850  1.00  0.00            
ATOM   4720  H5   5g B 592      58.810 -26.940  69.530  1.00  0.00            
ATOM   4721  H7   5g B 592      59.740 -29.390  70.050  1.00  0.00            
ATOM   4722  N4   5g B 592      54.150 -29.680  70.390  1.00  0.00            
ATOM   4723  H8   5g B 592      53.600 -30.520  70.440  1.00  0.00            
ATOM   4724  C12  5g B 592      53.680 -28.430  71.010  1.00  0.00            
ATOM   4725  H6   5g B 592      54.510 -27.750  71.250  1.00  0.00            
ATOM   4726  C13  5g B 592      52.910 -27.700  69.900  1.00  0.00            
ATOM   4727  HC1  5g B 592      52.690 -26.670  70.190  1.00  0.00            
ATOM   4728  HC2  5g B 592      53.580 -27.700  69.030  1.00  0.00            
ATOM   4729  C14  5g B 592      51.560 -28.390  69.530  1.00  0.00            
ATOM   4730  H9   5g B 592      51.070 -27.770  68.770  1.00  0.00            
ATOM   4731  H12  5g B 592      51.830 -29.390  69.150  1.00  0.00            
ATOM   4732  N5   5g B 592      50.670 -28.560  70.710  1.00  0.00            
ATOM   4733  HN   5g B 592      50.410 -27.630  71.030  1.00  0.00            
ATOM   4734  C15  5g B 592      51.380 -29.280  71.860  1.00  0.00            
ATOM   4735  H10  5g B 592      50.740 -29.330  72.740  1.00  0.00            
ATOM   4736  H13  5g B 592      51.530 -30.320  71.550  1.00  0.00            
ATOM   4737  C16  5g B 592      52.800 -28.750  72.270  1.00  0.00            
ATOM   4738  H11  5g B 592      53.320 -29.390  73.000  1.00  0.00            
ATOM   4739  H14  5g B 592      52.670 -27.840  72.880  1.00  0.00            
TER
ENDMDL
