# Supplementary material for: The Inhibitory Mechanism of 7H-Pyrrolo[2,3-d]pyrimidine Derivatives as Inhibitors of P21-Activated Kinase 4 through Molecular Dynamics Simulation
Source: Molecules. 2023 Jan 3;28(1):413. doi: 10.3390/molecules28010413 (PMC9823812; doi:10.3390/molecules28010413)
Supplement: Supplementary file 1 [file molecules-28-00413-s001.zip › 5h.pdb]

REMARK    GENERATED BY TRJCONV
TITLE     SERINE/THREONINE-PROTEIN KINASE PAK 4 in water t= 162540.00000 step= 81270000
REMARK    THIS IS A SIMULATION BOX
CRYST1   82.589   82.589   82.589  90.00  90.00  90.00 P 1           1
MODEL        1
ATOM      1  N   SER A 299      11.910  55.040  27.090  1.00  0.00           N
ATOM      2  H1  SER A 299      11.850  55.980  27.450  1.00  0.00           H
ATOM      3  H2  SER A 299      10.980  54.740  26.820  1.00  0.00           H
ATOM      4  H3  SER A 299      12.110  54.410  27.860  1.00  0.00           H
ATOM      5  CA  SER A 299      12.910  54.980  26.020  1.00  0.00           C
ATOM      6  HA  SER A 299      12.600  55.750  25.310  1.00  0.00           H
ATOM      7  CB  SER A 299      14.330  55.370  26.480  1.00  0.00           C
ATOM      8  HB1 SER A 299      14.980  55.320  25.610  1.00  0.00           H
ATOM      9  HB2 SER A 299      14.700  54.730  27.290  1.00  0.00           H
ATOM     10  OG  SER A 299      14.300  56.650  27.020  1.00  0.00           O
ATOM     11  HG  SER A 299      14.990  56.810  27.660  1.00  0.00           H
ATOM     12  C   SER A 299      13.020  53.600  25.400  1.00  0.00           C
ATOM     13  O   SER A 299      12.570  52.610  25.950  1.00  0.00           O
ATOM     14  N   SER A 300      13.540  53.530  24.200  1.00  0.00           N
ATOM     15  H   SER A 300      13.900  54.350  23.730  1.00  0.00           H
ATOM     16  CA  SER A 300      13.510  52.350  23.280  1.00  0.00           C
ATOM     17  HA  SER A 300      12.480  52.000  23.140  1.00  0.00           H
ATOM     18  CB  SER A 300      13.960  52.760  21.880  1.00  0.00           C
ATOM     19  HB1 SER A 300      13.320  53.590  21.580  1.00  0.00           H
ATOM     20  HB2 SER A 300      13.880  51.910  21.190  1.00  0.00           H
ATOM     21  OG  SER A 300      15.330  53.100  21.940  1.00  0.00           O
ATOM     22  HG  SER A 300      15.650  52.940  21.050  1.00  0.00           H
ATOM     23  C   SER A 300      14.210  51.040  23.730  1.00  0.00           C
ATOM     24  O   SER A 300      13.930  49.920  23.230  1.00  0.00           O
ATOM     25  N   HIS A 301      15.030  51.160  24.790  1.00  0.00           N
ATOM     26  H   HIS A 301      15.180  52.120  25.060  1.00  0.00           H
ATOM     27  CA  HIS A 301      15.960  50.130  25.320  1.00  0.00           C
ATOM     28  HA  HIS A 301      16.060  49.270  24.660  1.00  0.00           H
ATOM     29  CB  HIS A 301      17.330  50.680  25.570  1.00  0.00           C
ATOM     30  HB1 HIS A 301      17.650  51.210  24.670  1.00  0.00           H
ATOM     31  HB2 HIS A 301      17.890  49.760  25.750  1.00  0.00           H
ATOM     32  CG  HIS A 301      17.460  51.740  26.620  1.00  0.00           C
ATOM     33  ND1 HIS A 301      16.590  52.780  26.860  1.00  0.00           N
ATOM     34  CE1 HIS A 301      17.140  53.530  27.750  1.00  0.00           C
ATOM     35  HE1 HIS A 301      16.670  54.480  28.000  1.00  0.00           H
ATOM     36  NE2 HIS A 301      18.330  53.020  28.180  1.00  0.00           N
ATOM     37  HE2 HIS A 301      18.860  53.350  28.970  1.00  0.00           H
ATOM     38  CD2 HIS A 301      18.550  51.880  27.500  1.00  0.00           C
ATOM     39  HD2 HIS A 301      19.470  51.320  27.630  1.00  0.00           H
ATOM     40  C   HIS A 301      15.390  49.540  26.600  1.00  0.00           C
ATOM     41  O   HIS A 301      15.990  48.510  26.970  1.00  0.00           O
ATOM     42  N   GLU A 302      14.400  50.060  27.280  1.00  0.00           N
ATOM     43  H   GLU A 302      13.990  50.900  26.900  1.00  0.00           H
ATOM     44  CA  GLU A 302      14.000  49.650  28.660  1.00  0.00           C
ATOM     45  HA  GLU A 302      14.880  49.720  29.300  1.00  0.00           H
ATOM     46  CB  GLU A 302      12.840  50.540  29.150  1.00  0.00           C
ATOM     47  HB1 GLU A 302      12.520  50.060  30.070  1.00  0.00           H
ATOM     48  HB2 GLU A 302      11.980  50.520  28.480  1.00  0.00           H
ATOM     49  CG  GLU A 302      13.390  51.910  29.450  1.00  0.00           C
ATOM     50  HG1 GLU A 302      13.860  52.360  28.580  1.00  0.00           H
ATOM     51  HG2 GLU A 302      14.170  51.680  30.180  1.00  0.00           H
ATOM     52  CD  GLU A 302      12.350  52.830  30.010  1.00  0.00           C
ATOM     53  OE1 GLU A 302      11.460  53.340  29.260  1.00  0.00           O
ATOM     54  OE2 GLU A 302      12.490  53.250  31.210  1.00  0.00           O
ATOM     55  C   GLU A 302      13.570  48.130  28.780  1.00  0.00           C
ATOM     56  O   GLU A 302      13.940  47.530  29.750  1.00  0.00           O
ATOM     57  N   GLN A 303      12.880  47.650  27.730  1.00  0.00           N
ATOM     58  H   GLN A 303      12.770  48.210  26.900  1.00  0.00           H
ATOM     59  CA  GLN A 303      12.430  46.230  27.730  1.00  0.00           C
ATOM     60  HA  GLN A 303      12.150  45.890  28.730  1.00  0.00           H
ATOM     61  CB  GLN A 303      11.190  46.020  26.900  1.00  0.00           C
ATOM     62  HB1 GLN A 303      10.950  44.960  26.960  1.00  0.00           H
ATOM     63  HB2 GLN A 303      11.460  46.110  25.850  1.00  0.00           H
ATOM     64  CG  GLN A 303       9.930  46.790  27.360  1.00  0.00           C
ATOM     65  HG1 GLN A 303       9.740  46.430  28.370  1.00  0.00           H
ATOM     66  HG2 GLN A 303       9.110  46.470  26.710  1.00  0.00           H
ATOM     67  CD  GLN A 303      10.030  48.320  27.220  1.00  0.00           C
ATOM     68  OE1 GLN A 303      10.840  48.800  26.400  1.00  0.00           O
ATOM     69  NE2 GLN A 303       9.140  49.090  27.790  1.00  0.00           N
ATOM     70 1HE2 GLN A 303       8.380  48.730  28.350  1.00  0.00           H
ATOM     71 2HE2 GLN A 303       9.230  50.080  27.650  1.00  0.00           H
ATOM     72  C   GLN A 303      13.600  45.330  27.340  1.00  0.00           C
ATOM     73  O   GLN A 303      13.890  44.300  27.920  1.00  0.00           O
ATOM     74  N   PHE A 304      14.480  45.810  26.470  1.00  0.00           N
ATOM     75  H   PHE A 304      14.120  46.570  25.920  1.00  0.00           H
ATOM     76  CA  PHE A 304      15.710  45.090  26.060  1.00  0.00           C
ATOM     77  HA  PHE A 304      15.440  44.040  25.940  1.00  0.00           H
ATOM     78  CB  PHE A 304      16.300  45.550  24.770  1.00  0.00           C
ATOM     79  HB1 PHE A 304      16.590  46.590  24.830  1.00  0.00           H
ATOM     80  HB2 PHE A 304      15.480  45.250  24.110  1.00  0.00           H
ATOM     81  CG  PHE A 304      17.470  44.640  24.320  1.00  0.00           C
ATOM     82  CD1 PHE A 304      17.250  43.260  24.110  1.00  0.00           C
ATOM     83  HD1 PHE A 304      16.330  42.770  24.360  1.00  0.00           H
ATOM     84  CE1 PHE A 304      18.280  42.460  23.630  1.00  0.00           C
ATOM     85  HE1 PHE A 304      18.280  41.400  23.470  1.00  0.00           H
ATOM     86  CZ  PHE A 304      19.540  43.060  23.360  1.00  0.00           C
ATOM     87  HZ  PHE A 304      20.350  42.440  23.000  1.00  0.00           H
ATOM     88  CE2 PHE A 304      19.770  44.380  23.580  1.00  0.00           C
ATOM     89  HE2 PHE A 304      20.690  44.900  23.350  1.00  0.00           H
ATOM     90  CD2 PHE A 304      18.730  45.210  24.050  1.00  0.00           C
ATOM     91  HD2 PHE A 304      18.960  46.260  24.150  1.00  0.00           H
ATOM     92  C   PHE A 304      16.760  45.110  27.220  1.00  0.00           C
ATOM     93  O   PHE A 304      17.350  44.020  27.470  1.00  0.00           O
ATOM     94  N   ARG A 305      16.850  46.160  28.100  1.00  0.00           N
ATOM     95  H   ARG A 305      16.280  46.920  27.750  1.00  0.00           H
ATOM     96  CA  ARG A 305      17.690  46.320  29.250  1.00  0.00           C
ATOM     97  HA  ARG A 305      18.760  46.170  29.120  1.00  0.00           H
ATOM     98  CB  ARG A 305      17.450  47.720  29.970  1.00  0.00           C
ATOM     99  HB1 ARG A 305      16.520  47.540  30.510  1.00  0.00           H
ATOM    100  HB2 ARG A 305      17.490  48.480  29.190  1.00  0.00           H
ATOM    101  CG  ARG A 305      18.590  48.050  30.920  1.00  0.00           C
ATOM    102  HG1 ARG A 305      19.470  47.710  30.380  1.00  0.00           H
ATOM    103  HG2 ARG A 305      18.350  47.440  31.790  1.00  0.00           H
ATOM    104  CD  ARG A 305      18.600  49.630  31.320  1.00  0.00           C
ATOM    105  HD1 ARG A 305      18.950  50.150  30.430  1.00  0.00           H
ATOM    106  HD2 ARG A 305      19.230  49.900  32.160  1.00  0.00           H
ATOM    107  NE  ARG A 305      17.270  50.020  31.870  1.00  0.00           N
ATOM    108  HE  ARG A 305      16.680  49.310  32.270  1.00  0.00           H
ATOM    109  CZ  ARG A 305      16.710  51.180  32.010  1.00  0.00           C
ATOM    110  NH1 ARG A 305      15.550  51.310  32.580  1.00  0.00           N
ATOM    111 1HH1 ARG A 305      15.040  50.450  32.730  1.00  0.00           H
ATOM    112 2HH1 ARG A 305      15.000  52.150  32.580  1.00  0.00           H
ATOM    113  NH2 ARG A 305      17.170  52.250  31.540  1.00  0.00           N
ATOM    114 1HH2 ARG A 305      18.060  52.290  31.070  1.00  0.00           H
ATOM    115 2HH2 ARG A 305      16.650  53.120  31.610  1.00  0.00           H
ATOM    116  C   ARG A 305      17.260  45.170  30.190  1.00  0.00           C
ATOM    117  O   ARG A 305      18.110  44.420  30.700  1.00  0.00           O
ATOM    118  N   ALA A 306      15.970  44.900  30.300  1.00  0.00           N
ATOM    119  H   ALA A 306      15.280  45.600  30.030  1.00  0.00           H
ATOM    120  CA  ALA A 306      15.460  44.020  31.290  1.00  0.00           C
ATOM    121  HA  ALA A 306      16.070  44.150  32.180  1.00  0.00           H
ATOM    122  CB  ALA A 306      13.980  44.480  31.520  1.00  0.00           C
ATOM    123  HB1 ALA A 306      13.530  44.760  30.560  1.00  0.00           H
ATOM    124  HB2 ALA A 306      13.390  43.680  31.980  1.00  0.00           H
ATOM    125  HB3 ALA A 306      14.140  45.390  32.090  1.00  0.00           H
ATOM    126  C   ALA A 306      15.480  42.570  30.850  1.00  0.00           C
ATOM    127  O   ALA A 306      15.390  41.680  31.700  1.00  0.00           O
ATOM    128  N   ALA A 307      15.580  42.310  29.540  1.00  0.00           N
ATOM    129  H   ALA A 307      15.650  43.130  28.950  1.00  0.00           H
ATOM    130  CA  ALA A 307      15.810  41.050  28.840  1.00  0.00           C
ATOM    131  HA  ALA A 307      15.250  40.240  29.320  1.00  0.00           H
ATOM    132  CB  ALA A 307      15.360  41.160  27.410  1.00  0.00           C
ATOM    133  HB1 ALA A 307      15.570  40.210  26.930  1.00  0.00           H
ATOM    134  HB2 ALA A 307      14.290  41.330  27.510  1.00  0.00           H
ATOM    135  HB3 ALA A 307      15.930  41.930  26.890  1.00  0.00           H
ATOM    136  C   ALA A 307      17.260  40.610  29.020  1.00  0.00           C
ATOM    137  O   ALA A 307      17.520  39.420  29.120  1.00  0.00           O
ATOM    138  N   LEU A 308      18.170  41.590  29.150  1.00  0.00           N
ATOM    139  H   LEU A 308      17.740  42.500  29.150  1.00  0.00           H
ATOM    140  CA  LEU A 308      19.590  41.310  29.370  1.00  0.00           C
ATOM    141  HA  LEU A 308      19.860  40.430  28.780  1.00  0.00           H
ATOM    142  CB  LEU A 308      20.600  42.460  28.850  1.00  0.00           C
ATOM    143  HB1 LEU A 308      21.590  42.290  29.260  1.00  0.00           H
ATOM    144  HB2 LEU A 308      20.170  43.380  29.230  1.00  0.00           H
ATOM    145  CG  LEU A 308      20.780  42.630  27.380  1.00  0.00           C
ATOM    146  HG  LEU A 308      19.800  42.660  26.900  1.00  0.00           H
ATOM    147  CD1 LEU A 308      21.390  43.950  26.950  1.00  0.00           C
ATOM    148 1HD1 LEU A 308      22.340  44.150  27.450  1.00  0.00           H
ATOM    149 2HD1 LEU A 308      21.600  43.870  25.880  1.00  0.00           H
ATOM    150 3HD1 LEU A 308      20.730  44.800  27.100  1.00  0.00           H
ATOM    151  CD2 LEU A 308      21.570  41.440  26.690  1.00  0.00           C
ATOM    152 1HD2 LEU A 308      22.630  41.550  26.890  1.00  0.00           H
ATOM    153 2HD2 LEU A 308      21.230  40.460  27.030  1.00  0.00           H
ATOM    154 3HD2 LEU A 308      21.160  41.480  25.680  1.00  0.00           H
ATOM    155  C   LEU A 308      19.910  41.110  30.900  1.00  0.00           C
ATOM    156  O   LEU A 308      20.550  40.110  31.220  1.00  0.00           O
ATOM    157  N   GLN A 309      19.170  41.860  31.760  1.00  0.00           N
ATOM    158  H   GLN A 309      18.700  42.700  31.470  1.00  0.00           H
ATOM    159  CA  GLN A 309      19.300  41.660  33.240  1.00  0.00           C
ATOM    160  HA  GLN A 309      20.290  42.010  33.510  1.00  0.00           H
ATOM    161  CB  GLN A 309      18.200  42.500  34.020  1.00  0.00           C
ATOM    162  HB1 GLN A 309      17.200  42.060  33.890  1.00  0.00           H
ATOM    163  HB2 GLN A 309      18.290  43.500  33.580  1.00  0.00           H
ATOM    164  CG  GLN A 309      18.560  42.720  35.520  1.00  0.00           C
ATOM    165  HG1 GLN A 309      19.630  42.900  35.620  1.00  0.00           H
ATOM    166  HG2 GLN A 309      18.330  41.800  36.050  1.00  0.00           H
ATOM    167  CD  GLN A 309      17.800  43.880  36.160  1.00  0.00           C
ATOM    168  OE1 GLN A 309      17.180  44.790  35.580  1.00  0.00           O
ATOM    169  NE2 GLN A 309      17.870  44.040  37.500  1.00  0.00           N
ATOM    170 1HE2 GLN A 309      18.280  43.470  38.220  1.00  0.00           H
ATOM    171 2HE2 GLN A 309      17.480  44.940  37.730  1.00  0.00           H
ATOM    172  C   GLN A 309      19.140  40.140  33.640  1.00  0.00           C
ATOM    173  O   GLN A 309      19.740  39.690  34.610  1.00  0.00           O
ATOM    174  N   LEU A 310      18.350  39.340  32.910  1.00  0.00           N
ATOM    175  H   LEU A 310      18.040  39.700  32.020  1.00  0.00           H
ATOM    176  CA  LEU A 310      18.140  37.910  33.000  1.00  0.00           C
ATOM    177  HA  LEU A 310      17.680  37.720  33.970  1.00  0.00           H
ATOM    178  CB  LEU A 310      17.140  37.390  31.920  1.00  0.00           C
ATOM    179  HB1 LEU A 310      16.840  36.350  32.070  1.00  0.00           H
ATOM    180  HB2 LEU A 310      17.610  37.480  30.940  1.00  0.00           H
ATOM    181  CG  LEU A 310      15.820  38.210  31.720  1.00  0.00           C
ATOM    182  HG  LEU A 310      16.120  39.170  31.290  1.00  0.00           H
ATOM    183  CD1 LEU A 310      15.000  37.530  30.620  1.00  0.00           C
ATOM    184 1HD1 LEU A 310      14.620  36.550  30.910  1.00  0.00           H
ATOM    185 2HD1 LEU A 310      14.050  38.050  30.500  1.00  0.00           H
ATOM    186 3HD1 LEU A 310      15.480  37.610  29.640  1.00  0.00           H
ATOM    187  CD2 LEU A 310      14.960  38.270  32.960  1.00  0.00           C
ATOM    188 1HD2 LEU A 310      15.490  38.780  33.770  1.00  0.00           H
ATOM    189 2HD2 LEU A 310      13.990  38.730  32.750  1.00  0.00           H
ATOM    190 3HD2 LEU A 310      14.720  37.270  33.310  1.00  0.00           H
ATOM    191  C   LEU A 310      19.410  36.990  32.930  1.00  0.00           C
ATOM    192  O   LEU A 310      19.530  36.030  33.620  1.00  0.00           O
ATOM    193  N   VAL A 311      20.320  37.280  31.960  1.00  0.00           N
ATOM    194  H   VAL A 311      20.200  38.210  31.570  1.00  0.00           H
ATOM    195  CA  VAL A 311      21.410  36.400  31.500  1.00  0.00           C
ATOM    196  HA  VAL A 311      21.300  35.500  32.100  1.00  0.00           H
ATOM    197  CB  VAL A 311      21.310  36.020  30.060  1.00  0.00           C
ATOM    198  HB  VAL A 311      22.130  35.370  29.770  1.00  0.00           H
ATOM    199  CG1 VAL A 311      20.070  35.140  29.930  1.00  0.00           C
ATOM    200 1HG1 VAL A 311      19.970  34.850  28.880  1.00  0.00           H
ATOM    201 2HG1 VAL A 311      20.340  34.220  30.450  1.00  0.00           H
ATOM    202 3HG1 VAL A 311      19.150  35.600  30.280  1.00  0.00           H
ATOM    203  CG2 VAL A 311      21.260  37.290  29.220  1.00  0.00           C
ATOM    204 1HG2 VAL A 311      21.660  37.060  28.230  1.00  0.00           H
ATOM    205 2HG2 VAL A 311      20.240  37.620  29.080  1.00  0.00           H
ATOM    206 3HG2 VAL A 311      21.850  38.080  29.680  1.00  0.00           H
ATOM    207  C   VAL A 311      22.830  36.790  31.950  1.00  0.00           C
ATOM    208  O   VAL A 311      23.680  35.930  32.090  1.00  0.00           O
ATOM    209  N   VAL A 312      23.060  38.070  32.290  1.00  0.00           N
ATOM    210  H   VAL A 312      22.290  38.720  32.230  1.00  0.00           H
ATOM    211  CA  VAL A 312      24.260  38.500  32.950  1.00  0.00           C
ATOM    212  HA  VAL A 312      25.140  38.160  32.400  1.00  0.00           H
ATOM    213  CB  VAL A 312      24.400  40.040  32.910  1.00  0.00           C
ATOM    214  HB  VAL A 312      25.270  40.450  33.430  1.00  0.00           H
ATOM    215  CG1 VAL A 312      24.360  40.600  31.500  1.00  0.00           C
ATOM    216 1HG1 VAL A 312      24.320  41.690  31.500  1.00  0.00           H
ATOM    217 2HG1 VAL A 312      25.330  40.310  31.080  1.00  0.00           H
ATOM    218 3HG1 VAL A 312      23.530  40.200  30.920  1.00  0.00           H
ATOM    219  CG2 VAL A 312      23.280  40.800  33.720  1.00  0.00           C
ATOM    220 1HG2 VAL A 312      23.750  41.750  33.950  1.00  0.00           H
ATOM    221 2HG2 VAL A 312      22.350  40.830  33.150  1.00  0.00           H
ATOM    222 3HG2 VAL A 312      22.980  40.330  34.660  1.00  0.00           H
ATOM    223  C   VAL A 312      24.470  37.930  34.370  1.00  0.00           C
ATOM    224  O   VAL A 312      23.490  37.570  35.060  1.00  0.00           O
ATOM    225  N   ASP A 313      25.740  37.950  34.900  1.00  0.00           N
ATOM    226  H   ASP A 313      26.530  38.210  34.330  1.00  0.00           H
ATOM    227  CA  ASP A 313      26.110  37.620  36.300  1.00  0.00           C
ATOM    228  HA  ASP A 313      25.490  36.790  36.630  1.00  0.00           H
ATOM    229  CB  ASP A 313      27.470  37.110  36.430  1.00  0.00           C
ATOM    230  HB1 ASP A 313      27.770  36.670  37.380  1.00  0.00           H
ATOM    231  HB2 ASP A 313      28.220  37.900  36.370  1.00  0.00           H
ATOM    232  CG  ASP A 313      27.750  36.100  35.310  1.00  0.00           C
ATOM    233  OD1 ASP A 313      28.730  36.320  34.540  1.00  0.00           O
ATOM    234  OD2 ASP A 313      27.150  35.000  35.120  1.00  0.00           O
ATOM    235  C   ASP A 313      25.960  38.710  37.320  1.00  0.00           C
ATOM    236  O   ASP A 313      26.090  39.860  36.970  1.00  0.00           O
ATOM    237  N   PRO A 314      25.700  38.440  38.600  1.00  0.00           N
ATOM    238  CD  PRO A 314      25.500  37.110  39.180  1.00  0.00           C
ATOM    239  HD1 PRO A 314      26.430  36.560  39.320  1.00  0.00           H
ATOM    240  HD2 PRO A 314      24.930  36.420  38.560  1.00  0.00           H
ATOM    241  CG  PRO A 314      24.840  37.250  40.540  1.00  0.00           C
ATOM    242  HG1 PRO A 314      25.260  36.470  41.170  1.00  0.00           H
ATOM    243  HG2 PRO A 314      23.760  37.110  40.480  1.00  0.00           H
ATOM    244  CB  PRO A 314      25.110  38.680  40.950  1.00  0.00           C
ATOM    245  HB1 PRO A 314      26.020  38.870  41.520  1.00  0.00           H
ATOM    246  HB2 PRO A 314      24.320  39.070  41.590  1.00  0.00           H
ATOM    247  CA  PRO A 314      25.220  39.460  39.620  1.00  0.00           C
ATOM    248  HA  PRO A 314      24.260  39.870  39.300  1.00  0.00           H
ATOM    249  C   PRO A 314      26.100  40.680  39.880  1.00  0.00           C
ATOM    250  O   PRO A 314      25.630  41.630  40.510  1.00  0.00           O
ATOM    251  N   GLY A 315      27.340  40.620  39.440  1.00  0.00           N
ATOM    252  H   GLY A 315      27.600  39.860  38.840  1.00  0.00           H
ATOM    253  CA  GLY A 315      28.400  41.520  39.900  1.00  0.00           C
ATOM    254  HA1 GLY A 315      29.440  41.230  39.710  1.00  0.00           H
ATOM    255  HA2 GLY A 315      28.170  41.570  40.960  1.00  0.00           H
ATOM    256  C   GLY A 315      28.310  43.000  39.420  1.00  0.00           C
ATOM    257  O   GLY A 315      27.620  43.320  38.460  1.00  0.00           O
ATOM    258  N   ASP A 316      29.070  43.770  40.090  1.00  0.00           N
ATOM    259  H   ASP A 316      29.330  43.520  41.030  1.00  0.00           H
ATOM    260  CA  ASP A 316      29.530  45.050  39.530  1.00  0.00           C
ATOM    261  HA  ASP A 316      28.800  45.320  38.760  1.00  0.00           H
ATOM    262  CB  ASP A 316      29.620  46.080  40.580  1.00  0.00           C
ATOM    263  HB1 ASP A 316      29.830  45.570  41.520  1.00  0.00           H
ATOM    264  HB2 ASP A 316      28.630  46.500  40.780  1.00  0.00           H
ATOM    265  CG  ASP A 316      30.560  47.210  40.310  1.00  0.00           C
ATOM    266  OD1 ASP A 316      30.700  48.030  41.290  1.00  0.00           O
ATOM    267  OD2 ASP A 316      31.170  47.370  39.240  1.00  0.00           O
ATOM    268  C   ASP A 316      30.950  44.670  38.920  1.00  0.00           C
ATOM    269  O   ASP A 316      31.810  44.170  39.680  1.00  0.00           O
ATOM    270  N   PRO A 317      31.310  44.980  37.640  1.00  0.00           N
ATOM    271  CD  PRO A 317      30.450  45.460  36.600  1.00  0.00           C
ATOM    272  HD1 PRO A 317      30.010  46.430  36.850  1.00  0.00           H
ATOM    273  HD2 PRO A 317      29.630  44.750  36.480  1.00  0.00           H
ATOM    274  CG  PRO A 317      31.270  45.480  35.280  1.00  0.00           C
ATOM    275  HG1 PRO A 317      31.580  46.510  35.100  1.00  0.00           H
ATOM    276  HG2 PRO A 317      30.740  45.080  34.410  1.00  0.00           H
ATOM    277  CB  PRO A 317      32.620  44.760  35.640  1.00  0.00           C
ATOM    278  HB1 PRO A 317      33.510  45.290  35.310  1.00  0.00           H
ATOM    279  HB2 PRO A 317      32.720  43.750  35.230  1.00  0.00           H
ATOM    280  CA  PRO A 317      32.640  44.610  37.180  1.00  0.00           C
ATOM    281  HA  PRO A 317      32.890  43.560  37.270  1.00  0.00           H
ATOM    282  C   PRO A 317      33.810  45.410  37.770  1.00  0.00           C
ATOM    283  O   PRO A 317      34.890  44.890  37.940  1.00  0.00           O
ATOM    284  N   ARG A 318      33.590  46.580  38.380  1.00  0.00           N
ATOM    285  H   ARG A 318      32.620  46.860  38.460  1.00  0.00           H
ATOM    286  CA  ARG A 318      34.630  47.290  39.160  1.00  0.00           C
ATOM    287  HA  ARG A 318      35.490  47.330  38.490  1.00  0.00           H
ATOM    288  CB  ARG A 318      34.240  48.710  39.580  1.00  0.00           C
ATOM    289  HB1 ARG A 318      35.030  49.240  40.110  1.00  0.00           H
ATOM    290  HB2 ARG A 318      33.460  48.400  40.280  1.00  0.00           H
ATOM    291  CG  ARG A 318      33.750  49.600  38.480  1.00  0.00           C
ATOM    292  HG1 ARG A 318      33.030  49.140  37.800  1.00  0.00           H
ATOM    293  HG2 ARG A 318      34.530  49.920  37.790  1.00  0.00           H
ATOM    294  CD  ARG A 318      32.990  50.880  39.080  1.00  0.00           C
ATOM    295  HD1 ARG A 318      32.720  51.600  38.310  1.00  0.00           H
ATOM    296  HD2 ARG A 318      33.710  51.450  39.680  1.00  0.00           H
ATOM    297  NE  ARG A 318      31.820  50.500  39.800  1.00  0.00           N
ATOM    298  HE  ARG A 318      31.690  49.570  40.180  1.00  0.00           H
ATOM    299  CZ  ARG A 318      30.840  51.260  40.140  1.00  0.00           C
ATOM    300  NH1 ARG A 318      30.730  52.540  39.910  1.00  0.00           N
ATOM    301 1HH1 ARG A 318      31.340  53.130  39.370  1.00  0.00           H
ATOM    302 2HH1 ARG A 318      29.890  52.900  40.340  1.00  0.00           H
ATOM    303  NH2 ARG A 318      29.920  50.790  40.930  1.00  0.00           N
ATOM    304 1HH2 ARG A 318      30.050  49.860  41.310  1.00  0.00           H
ATOM    305 2HH2 ARG A 318      29.200  51.370  41.340  1.00  0.00           H
ATOM    306  C   ARG A 318      35.110  46.550  40.470  1.00  0.00           C
ATOM    307  O   ARG A 318      36.170  46.860  41.040  1.00  0.00           O
ATOM    308  N   SER A 319      34.260  45.660  40.960  1.00  0.00           N
ATOM    309  H   SER A 319      33.440  45.400  40.430  1.00  0.00           H
ATOM    310  CA  SER A 319      34.520  44.800  42.110  1.00  0.00           C
ATOM    311  HA  SER A 319      35.110  45.340  42.860  1.00  0.00           H
ATOM    312  CB  SER A 319      33.220  44.330  42.790  1.00  0.00           C
ATOM    313  HB1 SER A 319      32.590  45.220  42.810  1.00  0.00           H
ATOM    314  HB2 SER A 319      33.450  44.060  43.820  1.00  0.00           H
ATOM    315  OG  SER A 319      32.520  43.270  42.200  1.00  0.00           O
ATOM    316  HG  SER A 319      32.240  43.570  41.330  1.00  0.00           H
ATOM    317  C   SER A 319      35.500  43.640  41.860  1.00  0.00           C
ATOM    318  O   SER A 319      36.020  43.120  42.830  1.00  0.00           O
ATOM    319  N   TYR A 320      35.860  43.420  40.600  1.00  0.00           N
ATOM    320  H   TYR A 320      35.300  43.880  39.890  1.00  0.00           H
ATOM    321  CA  TYR A 320      36.790  42.350  40.200  1.00  0.00           C
ATOM    322  HA  TYR A 320      37.270  41.950  41.090  1.00  0.00           H
ATOM    323  CB  TYR A 320      35.910  41.200  39.550  1.00  0.00           C
ATOM    324  HB1 TYR A 320      36.520  40.490  38.990  1.00  0.00           H
ATOM    325  HB2 TYR A 320      35.260  41.650  38.800  1.00  0.00           H
ATOM    326  CG  TYR A 320      35.030  40.460  40.540  1.00  0.00           C
ATOM    327  CD1 TYR A 320      35.500  39.900  41.730  1.00  0.00           C
ATOM    328  HD1 TYR A 320      36.550  39.890  42.010  1.00  0.00           H
ATOM    329  CE1 TYR A 320      34.600  39.250  42.640  1.00  0.00           C
ATOM    330  HE1 TYR A 320      35.080  38.790  43.500  1.00  0.00           H
ATOM    331  CZ  TYR A 320      33.240  39.210  42.540  1.00  0.00           C
ATOM    332  OH  TYR A 320      32.430  38.610  43.460  1.00  0.00           O
ATOM    333  HH  TYR A 320      33.050  38.410  44.170  1.00  0.00           H
ATOM    334  CE2 TYR A 320      32.740  39.880  41.410  1.00  0.00           C
ATOM    335  HE2 TYR A 320      31.690  39.960  41.200  1.00  0.00           H
ATOM    336  CD2 TYR A 320      33.600  40.350  40.400  1.00  0.00           C
ATOM    337  HD2 TYR A 320      33.250  40.770  39.470  1.00  0.00           H
ATOM    338  C   TYR A 320      37.910  42.830  39.180  1.00  0.00           C
ATOM    339  O   TYR A 320      38.900  42.130  38.940  1.00  0.00           O
ATOM    340  N   LEU A 321      37.730  44.000  38.520  1.00  0.00           N
ATOM    341  H   LEU A 321      36.940  44.550  38.810  1.00  0.00           H
ATOM    342  CA  LEU A 321      38.560  44.730  37.550  1.00  0.00           C
ATOM    343  HA  LEU A 321      39.550  44.270  37.560  1.00  0.00           H
ATOM    344  CB  LEU A 321      37.900  44.560  36.210  1.00  0.00           C
ATOM    345  HB1 LEU A 321      38.520  45.090  35.470  1.00  0.00           H
ATOM    346  HB2 LEU A 321      37.010  45.190  36.170  1.00  0.00           H
ATOM    347  CG  LEU A 321      37.640  43.110  35.780  1.00  0.00           C
ATOM    348  HG  LEU A 321      36.980  42.610  36.490  1.00  0.00           H
ATOM    349  CD1 LEU A 321      36.960  43.210  34.410  1.00  0.00           C
ATOM    350 1HD1 LEU A 321      36.160  43.950  34.390  1.00  0.00           H
ATOM    351 2HD1 LEU A 321      37.690  43.590  33.710  1.00  0.00           H
ATOM    352 3HD1 LEU A 321      36.720  42.210  34.050  1.00  0.00           H
ATOM    353  CD2 LEU A 321      38.870  42.280  35.580  1.00  0.00           C
ATOM    354 1HD2 LEU A 321      39.300  41.900  36.500  1.00  0.00           H
ATOM    355 2HD2 LEU A 321      38.540  41.340  35.130  1.00  0.00           H
ATOM    356 3HD2 LEU A 321      39.630  42.810  35.000  1.00  0.00           H
ATOM    357  C   LEU A 321      38.810  46.200  37.870  1.00  0.00           C
ATOM    358  O   LEU A 321      37.920  46.930  38.430  1.00  0.00           O
ATOM    359  N   ASP A 322      39.930  46.700  37.390  1.00  0.00           N
ATOM    360  H   ASP A 322      40.630  46.130  36.940  1.00  0.00           H
ATOM    361  CA  ASP A 322      40.290  48.080  37.630  1.00  0.00           C
ATOM    362  HA  ASP A 322      39.370  48.650  37.540  1.00  0.00           H
ATOM    363  CB  ASP A 322      41.030  48.240  38.960  1.00  0.00           C
ATOM    364  HB1 ASP A 322      42.000  47.750  38.830  1.00  0.00           H
ATOM    365  HB2 ASP A 322      40.500  47.820  39.820  1.00  0.00           H
ATOM    366  CG  ASP A 322      41.290  49.710  39.270  1.00  0.00           C
ATOM    367  OD1 ASP A 322      40.520  50.540  38.740  1.00  0.00           O
ATOM    368  OD2 ASP A 322      42.180  50.050  40.100  1.00  0.00           O
ATOM    369  C   ASP A 322      41.210  48.560  36.420  1.00  0.00           C
ATOM    370  O   ASP A 322      41.590  47.710  35.610  1.00  0.00           O
ATOM    371  N   ASN A 323      41.620  49.880  36.370  1.00  0.00           N
ATOM    372  H   ASN A 323      41.150  50.530  36.990  1.00  0.00           H
ATOM    373  CA  ASN A 323      42.640  50.360  35.430  1.00  0.00           C
ATOM    374  HA  ASN A 323      42.380  51.420  35.480  1.00  0.00           H
ATOM    375  CB  ASN A 323      44.060  49.990  35.880  1.00  0.00           C
ATOM    376  HB1 ASN A 323      44.370  48.970  35.690  1.00  0.00           H
ATOM    377  HB2 ASN A 323      44.100  50.030  36.970  1.00  0.00           H
ATOM    378  CG  ASN A 323      45.070  51.030  35.480  1.00  0.00           C
ATOM    379  OD1 ASN A 323      45.340  51.970  36.210  1.00  0.00           O
ATOM    380  ND2 ASN A 323      45.630  50.850  34.270  1.00  0.00           N
ATOM    381 1HD2 ASN A 323      45.150  50.130  33.740  1.00  0.00           H
ATOM    382 2HD2 ASN A 323      46.330  51.490  33.950  1.00  0.00           H
ATOM    383  C   ASN A 323      42.420  50.070  33.920  1.00  0.00           C
ATOM    384  O   ASN A 323      43.360  49.560  33.270  1.00  0.00           O
ATOM    385  N   PHE A 324      41.220  50.370  33.380  1.00  0.00           N
ATOM    386  H   PHE A 324      40.500  50.950  33.800  1.00  0.00           H
ATOM    387  CA  PHE A 324      40.730  50.050  32.070  1.00  0.00           C
ATOM    388  HA  PHE A 324      40.950  49.000  31.880  1.00  0.00           H
ATOM    389  CB  PHE A 324      39.230  50.270  31.860  1.00  0.00           C
ATOM    390  HB1 PHE A 324      38.830  49.930  30.910  1.00  0.00           H
ATOM    391  HB2 PHE A 324      38.980  51.330  31.770  1.00  0.00           H
ATOM    392  CG  PHE A 324      38.380  49.630  33.040  1.00  0.00           C
ATOM    393  CD1 PHE A 324      38.010  50.380  34.150  1.00  0.00           C
ATOM    394  HD1 PHE A 324      38.210  51.440  34.180  1.00  0.00           H
ATOM    395  CE1 PHE A 324      37.350  49.770  35.250  1.00  0.00           C
ATOM    396  HE1 PHE A 324      37.170  50.300  36.170  1.00  0.00           H
ATOM    397  CZ  PHE A 324      37.020  48.380  35.250  1.00  0.00           C
ATOM    398  HZ  PHE A 324      36.640  47.870  36.120  1.00  0.00           H
ATOM    399  CE2 PHE A 324      37.440  47.640  34.150  1.00  0.00           C
ATOM    400  HE2 PHE A 324      37.470  46.560  34.190  1.00  0.00           H
ATOM    401  CD2 PHE A 324      38.140  48.250  33.140  1.00  0.00           C
ATOM    402  HD2 PHE A 324      38.610  47.690  32.350  1.00  0.00           H
ATOM    403  C   PHE A 324      41.550  50.820  31.050  1.00  0.00           C
ATOM    404  O   PHE A 324      41.590  52.050  31.050  1.00  0.00           O
ATOM    405  N   ILE A 325      42.150  50.150  30.090  1.00  0.00           N
ATOM    406  H   ILE A 325      42.050  49.140  30.060  1.00  0.00           H
ATOM    407  CA  ILE A 325      42.850  50.760  28.890  1.00  0.00           C
ATOM    408  HA  ILE A 325      42.650  51.830  28.840  1.00  0.00           H
ATOM    409  CB  ILE A 325      44.340  50.370  28.960  1.00  0.00           C
ATOM    410  HB  ILE A 325      44.340  49.280  28.930  1.00  0.00           H
ATOM    411  CG2 ILE A 325      45.080  50.790  27.640  1.00  0.00           C
ATOM    412 1HG2 ILE A 325      46.170  50.740  27.690  1.00  0.00           H
ATOM    413 2HG2 ILE A 325      44.750  50.210  26.780  1.00  0.00           H
ATOM    414 3HG2 ILE A 325      44.790  51.780  27.300  1.00  0.00           H
ATOM    415  CG1 ILE A 325      45.020  50.920  30.210  1.00  0.00           C
ATOM    416 1HG1 ILE A 325      45.960  50.380  30.270  1.00  0.00           H
ATOM    417 2HG1 ILE A 325      44.490  50.780  31.150  1.00  0.00           H
ATOM    418  CD  ILE A 325      45.290  52.460  30.090  1.00  0.00           C
ATOM    419  HD1 ILE A 325      44.330  52.970  30.110  1.00  0.00           H
ATOM    420  HD2 ILE A 325      45.890  52.780  30.950  1.00  0.00           H
ATOM    421  HD3 ILE A 325      45.850  52.580  29.170  1.00  0.00           H
ATOM    422  C   ILE A 325      42.200  50.320  27.610  1.00  0.00           C
ATOM    423  O   ILE A 325      41.920  49.130  27.400  1.00  0.00           O
ATOM    424  N   LYS A 326      42.030  51.230  26.650  1.00  0.00           N
ATOM    425  H   LYS A 326      42.340  52.180  26.770  1.00  0.00           H
ATOM    426  CA  LYS A 326      41.380  50.870  25.420  1.00  0.00           C
ATOM    427  HA  LYS A 326      40.540  50.180  25.500  1.00  0.00           H
ATOM    428  CB  LYS A 326      40.680  52.090  24.840  1.00  0.00           C
ATOM    429  HB1 LYS A 326      41.370  52.810  24.400  1.00  0.00           H
ATOM    430  HB2 LYS A 326      40.130  52.530  25.670  1.00  0.00           H
ATOM    431  CG  LYS A 326      39.710  51.890  23.580  1.00  0.00           C
ATOM    432  HG1 LYS A 326      38.950  51.150  23.840  1.00  0.00           H
ATOM    433  HG2 LYS A 326      40.310  51.480  22.760  1.00  0.00           H
ATOM    434  CD  LYS A 326      39.150  53.240  23.090  1.00  0.00           C
ATOM    435  HD1 LYS A 326      39.980  53.930  22.940  1.00  0.00           H
ATOM    436  HD2 LYS A 326      38.650  53.760  23.900  1.00  0.00           H
ATOM    437  CE  LYS A 326      38.390  53.110  21.790  1.00  0.00           C
ATOM    438  HE1 LYS A 326      37.650  52.320  21.870  1.00  0.00           H
ATOM    439  HE2 LYS A 326      39.060  52.880  20.960  1.00  0.00           H
ATOM    440  NZ  LYS A 326      37.660  54.350  21.400  1.00  0.00           N
ATOM    441  HZ1 LYS A 326      38.340  55.080  21.250  1.00  0.00           H
ATOM    442  HZ2 LYS A 326      37.070  54.220  20.590  1.00  0.00           H
ATOM    443  HZ3 LYS A 326      37.140  54.800  22.140  1.00  0.00           H
ATOM    444  C   LYS A 326      42.350  50.150  24.450  1.00  0.00           C
ATOM    445  O   LYS A 326      43.510  50.630  24.340  1.00  0.00           O
ATOM    446  N   ILE A 327      41.920  49.070  23.800  1.00  0.00           N
ATOM    447  H   ILE A 327      40.990  48.740  24.010  1.00  0.00           H
ATOM    448  CA  ILE A 327      42.610  48.490  22.660  1.00  0.00           C
ATOM    449  HA  ILE A 327      43.550  48.990  22.430  1.00  0.00           H
ATOM    450  CB  ILE A 327      43.090  47.090  22.970  1.00  0.00           C
ATOM    451  HB  ILE A 327      43.290  46.620  22.010  1.00  0.00           H
ATOM    452  CG2 ILE A 327      44.440  47.220  23.820  1.00  0.00           C
ATOM    453 1HG2 ILE A 327      44.250  47.590  24.830  1.00  0.00           H
ATOM    454 2HG2 ILE A 327      44.860  46.230  24.000  1.00  0.00           H
ATOM    455 3HG2 ILE A 327      45.150  47.830  23.270  1.00  0.00           H
ATOM    456  CG1 ILE A 327      41.990  46.190  23.670  1.00  0.00           C
ATOM    457 1HG1 ILE A 327      41.100  46.190  23.040  1.00  0.00           H
ATOM    458 2HG1 ILE A 327      41.680  46.660  24.610  1.00  0.00           H
ATOM    459  CD  ILE A 327      42.450  44.720  23.880  1.00  0.00           C
ATOM    460  HD1 ILE A 327      41.710  44.110  24.380  1.00  0.00           H
ATOM    461  HD2 ILE A 327      42.720  44.330  22.890  1.00  0.00           H
ATOM    462  HD3 ILE A 327      43.370  44.570  24.450  1.00  0.00           H
ATOM    463  C   ILE A 327      41.780  48.640  21.390  1.00  0.00           C
ATOM    464  O   ILE A 327      42.400  48.500  20.370  1.00  0.00           O
ATOM    465  N   GLY A 328      40.510  48.810  21.380  1.00  0.00           N
ATOM    466  H   GLY A 328      39.940  48.800  22.210  1.00  0.00           H
ATOM    467  CA  GLY A 328      39.760  49.310  20.240  1.00  0.00           C
ATOM    468  HA1 GLY A 328      39.950  48.700  19.360  1.00  0.00           H
ATOM    469  HA2 GLY A 328      40.190  50.270  19.940  1.00  0.00           H
ATOM    470  C   GLY A 328      38.300  49.600  20.390  1.00  0.00           C
ATOM    471  O   GLY A 328      37.890  49.810  21.490  1.00  0.00           O
ATOM    472  N   GLU A 329      37.610  49.640  19.200  1.00  0.00           N
ATOM    473  H   GLU A 329      38.090  49.550  18.320  1.00  0.00           H
ATOM    474  CA  GLU A 329      36.160  49.700  19.050  1.00  0.00           C
ATOM    475  HA  GLU A 329      35.700  49.150  19.870  1.00  0.00           H
ATOM    476  CB  GLU A 329      35.710  51.100  19.250  1.00  0.00           C
ATOM    477  HB1 GLU A 329      36.190  51.450  20.170  1.00  0.00           H
ATOM    478  HB2 GLU A 329      34.640  51.260  19.370  1.00  0.00           H
ATOM    479  CG  GLU A 329      36.100  51.990  18.120  1.00  0.00           C
ATOM    480  HG1 GLU A 329      35.700  51.610  17.180  1.00  0.00           H
ATOM    481  HG2 GLU A 329      37.190  52.010  18.060  1.00  0.00           H
ATOM    482  CD  GLU A 329      35.500  53.400  18.370  1.00  0.00           C
ATOM    483  OE1 GLU A 329      34.520  53.710  17.670  1.00  0.00           O
ATOM    484  OE2 GLU A 329      36.010  54.110  19.280  1.00  0.00           O
ATOM    485  C   GLU A 329      35.700  48.990  17.750  1.00  0.00           C
ATOM    486  O   GLU A 329      36.430  48.790  16.850  1.00  0.00           O
ATOM    487  N   GLY A 330      34.380  48.750  17.570  1.00  0.00           N
ATOM    488  H   GLY A 330      33.780  48.820  18.380  1.00  0.00           H
ATOM    489  CA  GLY A 330      33.690  48.380  16.310  1.00  0.00           C
ATOM    490  HA1 GLY A 330      33.920  47.320  16.160  1.00  0.00           H
ATOM    491  HA2 GLY A 330      34.060  48.940  15.450  1.00  0.00           H
ATOM    492  C   GLY A 330      32.170  48.440  16.460  1.00  0.00           C
ATOM    493  O   GLY A 330      31.570  49.270  17.120  1.00  0.00           O
ATOM    494  N   SER A 331      31.540  47.580  15.720  1.00  0.00           N
ATOM    495  H   SER A 331      32.130  46.850  15.350  1.00  0.00           H
ATOM    496  CA  SER A 331      30.150  47.750  15.170  1.00  0.00           C
ATOM    497  HA  SER A 331      30.020  48.730  14.710  1.00  0.00           H
ATOM    498  CB  SER A 331      29.840  46.570  14.100  1.00  0.00           C
ATOM    499  HB1 SER A 331      28.890  46.700  13.580  1.00  0.00           H
ATOM    500  HB2 SER A 331      29.930  45.630  14.630  1.00  0.00           H
ATOM    501  OG  SER A 331      30.970  46.620  13.330  1.00  0.00           O
ATOM    502  HG  SER A 331      31.670  46.280  13.890  1.00  0.00           H
ATOM    503  C   SER A 331      29.090  47.680  16.290  1.00  0.00           C
ATOM    504  O   SER A 331      27.970  47.990  16.060  1.00  0.00           O
ATOM    505  N   THR A 332      29.420  47.180  17.490  1.00  0.00           N
ATOM    506  H   THR A 332      30.400  46.970  17.620  1.00  0.00           H
ATOM    507  CA  THR A 332      28.500  47.080  18.640  1.00  0.00           C
ATOM    508  HA  THR A 332      27.660  47.760  18.520  1.00  0.00           H
ATOM    509  CB  THR A 332      28.030  45.630  18.840  1.00  0.00           C
ATOM    510  HB  THR A 332      27.640  45.550  19.850  1.00  0.00           H
ATOM    511  CG2 THR A 332      26.900  45.190  17.940  1.00  0.00           C
ATOM    512 1HG2 THR A 332      26.690  44.130  18.110  1.00  0.00           H
ATOM    513 2HG2 THR A 332      25.980  45.660  18.290  1.00  0.00           H
ATOM    514 3HG2 THR A 332      27.040  45.400  16.880  1.00  0.00           H
ATOM    515  OG1 THR A 332      29.030  44.670  18.700  1.00  0.00           O
ATOM    516  HG1 THR A 332      29.100  44.590  17.750  1.00  0.00           H
ATOM    517  C   THR A 332      29.090  47.720  19.930  1.00  0.00           C
ATOM    518  O   THR A 332      28.320  48.150  20.760  1.00  0.00           O
ATOM    519  N   GLY A 333      30.380  47.840  20.080  1.00  0.00           N
ATOM    520  H   GLY A 333      31.010  47.480  19.380  1.00  0.00           H
ATOM    521  CA  GLY A 333      31.040  48.440  21.310  1.00  0.00           C
ATOM    522  HA1 GLY A 333      30.840  47.770  22.150  1.00  0.00           H
ATOM    523  HA2 GLY A 333      30.600  49.380  21.640  1.00  0.00           H
ATOM    524  C   GLY A 333      32.520  48.730  21.340  1.00  0.00           C
ATOM    525  O   GLY A 333      33.190  48.930  20.300  1.00  0.00           O
ATOM    526  N   ILE A 334      33.060  48.970  22.510  1.00  0.00           N
ATOM    527  H   ILE A 334      32.480  48.920  23.330  1.00  0.00           H
ATOM    528  CA  ILE A 334      34.420  49.390  22.820  1.00  0.00           C
ATOM    529  HA  ILE A 334      34.990  49.700  21.950  1.00  0.00           H
ATOM    530  CB  ILE A 334      34.370  50.450  23.940  1.00  0.00           C
ATOM    531  HB  ILE A 334      33.920  49.990  24.810  1.00  0.00           H
ATOM    532  CG2 ILE A 334      35.780  50.860  24.310  1.00  0.00           C
ATOM    533 1HG2 ILE A 334      36.390  50.060  24.740  1.00  0.00           H
ATOM    534 2HG2 ILE A 334      36.240  51.310  23.440  1.00  0.00           H
ATOM    535 3HG2 ILE A 334      35.690  51.570  25.140  1.00  0.00           H
ATOM    536  CG1 ILE A 334      33.540  51.700  23.510  1.00  0.00           C
ATOM    537 1HG1 ILE A 334      33.600  52.430  24.320  1.00  0.00           H
ATOM    538 2HG1 ILE A 334      32.490  51.410  23.450  1.00  0.00           H
ATOM    539  CD  ILE A 334      33.980  52.310  22.170  1.00  0.00           C
ATOM    540  HD1 ILE A 334      34.960  52.770  22.310  1.00  0.00           H
ATOM    541  HD2 ILE A 334      34.080  51.520  21.430  1.00  0.00           H
ATOM    542  HD3 ILE A 334      33.260  53.050  21.830  1.00  0.00           H
ATOM    543  C   ILE A 334      35.160  48.130  23.380  1.00  0.00           C
ATOM    544  O   ILE A 334      34.650  47.320  24.140  1.00  0.00           O
ATOM    545  N   VAL A 335      36.380  48.080  22.990  1.00  0.00           N
ATOM    546  H   VAL A 335      36.770  48.860  22.480  1.00  0.00           H
ATOM    547  CA  VAL A 335      37.340  47.000  23.390  1.00  0.00           C
ATOM    548  HA  VAL A 335      36.800  46.230  23.950  1.00  0.00           H
ATOM    549  CB  VAL A 335      38.030  46.220  22.140  1.00  0.00           C
ATOM    550  HB  VAL A 335      38.970  46.700  21.870  1.00  0.00           H
ATOM    551  CG1 VAL A 335      38.530  44.820  22.660  1.00  0.00           C
ATOM    552 1HG1 VAL A 335      39.000  44.280  21.840  1.00  0.00           H
ATOM    553 2HG1 VAL A 335      39.180  44.820  23.530  1.00  0.00           H
ATOM    554 3HG1 VAL A 335      37.590  44.310  22.890  1.00  0.00           H
ATOM    555  CG2 VAL A 335      37.110  46.010  20.980  1.00  0.00           C
ATOM    556 1HG2 VAL A 335      36.270  45.360  21.250  1.00  0.00           H
ATOM    557 2HG2 VAL A 335      36.750  46.920  20.510  1.00  0.00           H
ATOM    558 3HG2 VAL A 335      37.700  45.460  20.250  1.00  0.00           H
ATOM    559  C   VAL A 335      38.440  47.540  24.250  1.00  0.00           C
ATOM    560  O   VAL A 335      39.120  48.530  23.900  1.00  0.00           O
ATOM    561  N   CYS A 336      38.660  46.810  25.360  1.00  0.00           N
ATOM    562  H   CYS A 336      38.170  45.940  25.530  1.00  0.00           H
ATOM    563  CA  CYS A 336      39.520  47.200  26.440  1.00  0.00           C
ATOM    564  HA  CYS A 336      40.250  47.940  26.090  1.00  0.00           H
ATOM    565  CB  CYS A 336      38.700  47.890  27.560  1.00  0.00           C
ATOM    566  HB1 CYS A 336      39.390  48.220  28.330  1.00  0.00           H
ATOM    567  HB2 CYS A 336      38.040  47.150  28.010  1.00  0.00           H
ATOM    568  SG  CYS A 336      37.860  49.410  27.240  1.00  0.00           S
ATOM    569  HG  CYS A 336      38.110  49.530  25.940  1.00  0.00           H
ATOM    570  C   CYS A 336      40.340  45.980  26.980  1.00  0.00           C
ATOM    571  O   CYS A 336      40.080  44.820  26.700  1.00  0.00           O
ATOM    572  N   ILE A 337      41.260  46.280  27.810  1.00  0.00           N
ATOM    573  H   ILE A 337      41.360  47.290  27.880  1.00  0.00           H
ATOM    574  CA  ILE A 337      41.960  45.470  28.760  1.00  0.00           C
ATOM    575  HA  ILE A 337      41.460  44.500  28.780  1.00  0.00           H
ATOM    576  CB  ILE A 337      43.520  45.160  28.460  1.00  0.00           C
ATOM    577  HB  ILE A 337      44.010  44.860  29.380  1.00  0.00           H
ATOM    578  CG2 ILE A 337      43.740  43.960  27.560  1.00  0.00           C
ATOM    579 1HG2 ILE A 337      44.660  43.450  27.840  1.00  0.00           H
ATOM    580 2HG2 ILE A 337      42.900  43.290  27.770  1.00  0.00           H
ATOM    581 3HG2 ILE A 337      43.740  44.200  26.500  1.00  0.00           H
ATOM    582  CG1 ILE A 337      44.240  46.390  27.860  1.00  0.00           C
ATOM    583 1HG1 ILE A 337      43.550  47.170  28.190  1.00  0.00           H
ATOM    584 2HG1 ILE A 337      44.310  46.380  26.770  1.00  0.00           H
ATOM    585  CD  ILE A 337      45.640  46.660  28.520  1.00  0.00           C
ATOM    586  HD1 ILE A 337      46.090  45.700  28.810  1.00  0.00           H
ATOM    587  HD2 ILE A 337      46.220  47.230  27.800  1.00  0.00           H
ATOM    588  HD3 ILE A 337      45.580  47.170  29.480  1.00  0.00           H
ATOM    589  C   ILE A 337      41.760  46.140  30.110  1.00  0.00           C
ATOM    590  O   ILE A 337      41.530  47.350  30.270  1.00  0.00           O
ATOM    591  N   ALA A 338      41.920  45.270  31.100  1.00  0.00           N
ATOM    592  H   ALA A 338      41.990  44.290  30.860  1.00  0.00           H
ATOM    593  CA  ALA A 338      41.810  45.640  32.450  1.00  0.00           C
ATOM    594  HA  ALA A 338      42.160  46.670  32.560  1.00  0.00           H
ATOM    595  CB  ALA A 338      40.360  45.470  32.920  1.00  0.00           C
ATOM    596  HB1 ALA A 338      40.200  44.390  32.980  1.00  0.00           H
ATOM    597  HB2 ALA A 338      40.190  46.000  33.860  1.00  0.00           H
ATOM    598  HB3 ALA A 338      39.740  45.980  32.180  1.00  0.00           H
ATOM    599  C   ALA A 338      42.680  44.680  33.300  1.00  0.00           C
ATOM    600  O   ALA A 338      43.050  43.600  32.890  1.00  0.00           O
ATOM    601  N   THR A 339      43.020  45.140  34.540  1.00  0.00           N
ATOM    602  H   THR A 339      42.730  46.040  34.890  1.00  0.00           H
ATOM    603  CA  THR A 339      43.730  44.290  35.510  1.00  0.00           C
ATOM    604  HA  THR A 339      44.350  43.550  35.020  1.00  0.00           H
ATOM    605  CB  THR A 339      44.650  45.140  36.340  1.00  0.00           C
ATOM    606  HB  THR A 339      44.060  45.770  37.010  1.00  0.00           H
ATOM    607  CG2 THR A 339      45.650  44.300  37.160  1.00  0.00           C
ATOM    608 1HG2 THR A 339      45.170  43.720  37.950  1.00  0.00           H
ATOM    609 2HG2 THR A 339      46.190  43.660  36.460  1.00  0.00           H
ATOM    610 3HG2 THR A 339      46.410  44.970  37.560  1.00  0.00           H
ATOM    611  OG1 THR A 339      45.470  45.880  35.520  1.00  0.00           O
ATOM    612  HG1 THR A 339      45.040  46.330  34.780  1.00  0.00           H
ATOM    613  C   THR A 339      42.710  43.600  36.460  1.00  0.00           C
ATOM    614  O   THR A 339      41.930  44.340  37.080  1.00  0.00           O
ATOM    615  N   VAL A 340      42.770  42.260  36.620  1.00  0.00           N
ATOM    616  H   VAL A 340      43.400  41.660  36.110  1.00  0.00           H
ATOM    617  CA  VAL A 340      42.020  41.590  37.660  1.00  0.00           C
ATOM    618  HA  VAL A 340      41.020  42.010  37.550  1.00  0.00           H
ATOM    619  CB  VAL A 340      41.750  40.040  37.450  1.00  0.00           C
ATOM    620  HB  VAL A 340      40.820  39.770  37.930  1.00  0.00           H
ATOM    621  CG1 VAL A 340      41.440  39.710  36.040  1.00  0.00           C
ATOM    622 1HG1 VAL A 340      40.540  40.220  35.710  1.00  0.00           H
ATOM    623 2HG1 VAL A 340      42.270  39.940  35.370  1.00  0.00           H
ATOM    624 3HG1 VAL A 340      41.310  38.640  35.900  1.00  0.00           H
ATOM    625  CG2 VAL A 340      42.890  39.150  37.980  1.00  0.00           C
ATOM    626 1HG2 VAL A 340      43.850  39.490  37.600  1.00  0.00           H
ATOM    627 2HG2 VAL A 340      42.890  39.340  39.050  1.00  0.00           H
ATOM    628 3HG2 VAL A 340      42.640  38.110  37.780  1.00  0.00           H
ATOM    629  C   VAL A 340      42.490  42.050  39.070  1.00  0.00           C
ATOM    630  O   VAL A 340      43.640  42.470  39.240  1.00  0.00           O
ATOM    631  N   ARG A 341      41.630  41.980  40.050  1.00  0.00           N
ATOM    632  H   ARG A 341      40.780  41.550  39.730  1.00  0.00           H
ATOM    633  CA  ARG A 341      41.890  42.530  41.350  1.00  0.00           C
ATOM    634  HA  ARG A 341      42.310  43.520  41.210  1.00  0.00           H
ATOM    635  CB  ARG A 341      40.520  42.830  42.150  1.00  0.00           C
ATOM    636  HB1 ARG A 341      40.920  42.900  43.160  1.00  0.00           H
ATOM    637  HB2 ARG A 341      39.760  42.060  42.040  1.00  0.00           H
ATOM    638  CG  ARG A 341      39.970  44.170  41.760  1.00  0.00           C
ATOM    639  HG1 ARG A 341      39.420  44.030  40.830  1.00  0.00           H
ATOM    640  HG2 ARG A 341      40.800  44.840  41.570  1.00  0.00           H
ATOM    641  CD  ARG A 341      39.060  44.850  42.860  1.00  0.00           C
ATOM    642  HD1 ARG A 341      39.510  44.910  43.850  1.00  0.00           H
ATOM    643  HD2 ARG A 341      38.220  44.180  43.060  1.00  0.00           H
ATOM    644  NE  ARG A 341      38.490  46.200  42.420  1.00  0.00           N
ATOM    645  HE  ARG A 341      37.570  46.140  42.010  1.00  0.00           H
ATOM    646  CZ  ARG A 341      39.000  47.420  42.300  1.00  0.00           C
ATOM    647  NH1 ARG A 341      40.190  47.670  42.810  1.00  0.00           N
ATOM    648 1HH1 ARG A 341      40.680  46.910  43.250  1.00  0.00           H
ATOM    649 2HH1 ARG A 341      40.640  48.570  42.710  1.00  0.00           H
ATOM    650  NH2 ARG A 341      38.350  48.280  41.630  1.00  0.00           N
ATOM    651 1HH2 ARG A 341      37.410  48.060  41.310  1.00  0.00           H
ATOM    652 2HH2 ARG A 341      38.700  49.230  41.660  1.00  0.00           H
ATOM    653  C   ARG A 341      42.990  41.870  42.120  1.00  0.00           C
ATOM    654  O   ARG A 341      43.450  40.780  41.840  1.00  0.00           O
ATOM    655  N   SER A 342      43.550  42.570  43.110  1.00  0.00           N
ATOM    656  H   SER A 342      43.260  43.510  43.310  1.00  0.00           H
ATOM    657  CA  SER A 342      44.810  42.190  43.860  1.00  0.00           C
ATOM    658  HA  SER A 342      44.940  43.070  44.490  1.00  0.00           H
ATOM    659  CB  SER A 342      44.700  40.950  44.700  1.00  0.00           C
ATOM    660  HB1 SER A 342      45.600  40.730  45.260  1.00  0.00           H
ATOM    661  HB2 SER A 342      44.580  40.030  44.120  1.00  0.00           H
ATOM    662  OG  SER A 342      43.540  40.960  45.590  1.00  0.00           O
ATOM    663  HG  SER A 342      43.840  40.580  46.420  1.00  0.00           H
ATOM    664  C   SER A 342      46.010  42.130  42.940  1.00  0.00           C
ATOM    665  O   SER A 342      46.820  41.220  43.020  1.00  0.00           O
ATOM    666  N   SER A 343      46.080  43.040  42.000  1.00  0.00           N
ATOM    667  H   SER A 343      45.430  43.800  42.130  1.00  0.00           H
ATOM    668  CA  SER A 343      47.150  43.190  41.030  1.00  0.00           C
ATOM    669  HA  SER A 343      46.870  43.850  40.210  1.00  0.00           H
ATOM    670  CB  SER A 343      48.410  43.780  41.640  1.00  0.00           C
ATOM    671  HB1 SER A 343      49.160  44.060  40.890  1.00  0.00           H
ATOM    672  HB2 SER A 343      49.010  43.030  42.160  1.00  0.00           H
ATOM    673  OG  SER A 343      48.100  44.910  42.500  1.00  0.00           O
ATOM    674  HG  SER A 343      47.960  45.680  41.950  1.00  0.00           H
ATOM    675  C   SER A 343      47.410  41.910  40.230  1.00  0.00           C
ATOM    676  O   SER A 343      48.560  41.600  39.980  1.00  0.00           O
ATOM    677  N   GLY A 344      46.400  41.200  39.720  1.00  0.00           N
ATOM    678  H   GLY A 344      45.500  41.600  39.980  1.00  0.00           H
ATOM    679  CA  GLY A 344      46.440  39.950  38.970  1.00  0.00           C
ATOM    680  HA1 GLY A 344      45.550  39.320  38.970  1.00  0.00           H
ATOM    681  HA2 GLY A 344      47.250  39.370  39.420  1.00  0.00           H
ATOM    682  C   GLY A 344      46.790  40.130  37.510  1.00  0.00           C
ATOM    683  O   GLY A 344      47.520  41.060  37.200  1.00  0.00           O
ATOM    684  N   LYS A 345      46.340  39.110  36.710  1.00  0.00           N
ATOM    685  H   LYS A 345      45.840  38.320  37.090  1.00  0.00           H
ATOM    686  CA  LYS A 345      46.530  39.080  35.260  1.00  0.00           C
ATOM    687  HA  LYS A 345      47.590  39.240  35.090  1.00  0.00           H
ATOM    688  CB  LYS A 345      46.150  37.710  34.740  1.00  0.00           C
ATOM    689  HB1 LYS A 345      46.910  37.070  35.200  1.00  0.00           H
ATOM    690  HB2 LYS A 345      46.390  37.630  33.680  1.00  0.00           H
ATOM    691  CG  LYS A 345      44.780  36.990  35.120  1.00  0.00           C
ATOM    692  HG1 LYS A 345      43.980  37.660  34.790  1.00  0.00           H
ATOM    693  HG2 LYS A 345      44.740  36.830  36.200  1.00  0.00           H
ATOM    694  CD  LYS A 345      44.740  35.520  34.600  1.00  0.00           C
ATOM    695  HD1 LYS A 345      45.550  34.940  35.030  1.00  0.00           H
ATOM    696  HD2 LYS A 345      44.960  35.490  33.530  1.00  0.00           H
ATOM    697  CE  LYS A 345      43.400  34.750  34.910  1.00  0.00           C
ATOM    698  HE1 LYS A 345      42.700  35.320  34.300  1.00  0.00           H
ATOM    699  HE2 LYS A 345      43.230  34.680  35.990  1.00  0.00           H
ATOM    700  NZ  LYS A 345      43.420  33.360  34.460  1.00  0.00           N
ATOM    701  HZ1 LYS A 345      42.550  33.090  34.020  1.00  0.00           H
ATOM    702  HZ2 LYS A 345      44.160  33.280  33.770  1.00  0.00           H
ATOM    703  HZ3 LYS A 345      43.570  32.780  35.280  1.00  0.00           H
ATOM    704  C   LYS A 345      45.780  40.180  34.490  1.00  0.00           C
ATOM    705  O   LYS A 345      44.820  40.630  35.050  1.00  0.00           O
ATOM    706  N   LEU A 346      46.210  40.540  33.240  1.00  0.00           N
ATOM    707  H   LEU A 346      47.090  40.180  32.910  1.00  0.00           H
ATOM    708  CA  LEU A 346      45.410  41.230  32.250  1.00  0.00           C
ATOM    709  HA  LEU A 346      44.890  42.020  32.810  1.00  0.00           H
ATOM    710  CB  LEU A 346      46.330  41.800  31.190  1.00  0.00           C
ATOM    711  HB1 LEU A 346      45.720  42.190  30.370  1.00  0.00           H
ATOM    712  HB2 LEU A 346      46.990  41.030  30.790  1.00  0.00           H
ATOM    713  CG  LEU A 346      47.210  42.950  31.640  1.00  0.00           C
ATOM    714  HG  LEU A 346      47.800  42.780  32.540  1.00  0.00           H
ATOM    715  CD1 LEU A 346      48.050  43.450  30.520  1.00  0.00           C
ATOM    716 1HD1 LEU A 346      48.550  42.570  30.110  1.00  0.00           H
ATOM    717 2HD1 LEU A 346      47.430  43.570  29.630  1.00  0.00           H
ATOM    718 3HD1 LEU A 346      48.740  44.230  30.850  1.00  0.00           H
ATOM    719  CD2 LEU A 346      46.370  44.120  32.030  1.00  0.00           C
ATOM    720 1HD2 LEU A 346      45.820  43.910  32.950  1.00  0.00           H
ATOM    721 2HD2 LEU A 346      47.010  44.980  32.190  1.00  0.00           H
ATOM    722 3HD2 LEU A 346      45.710  44.410  31.220  1.00  0.00           H
ATOM    723  C   LEU A 346      44.410  40.320  31.590  1.00  0.00           C
ATOM    724  O   LEU A 346      44.700  39.220  31.130  1.00  0.00           O
ATOM    725  N   VAL A 347      43.190  40.890  31.450  1.00  0.00           N
ATOM    726  H   VAL A 347      42.910  41.730  31.920  1.00  0.00           H
ATOM    727  CA  VAL A 347      42.070  40.300  30.730  1.00  0.00           C
ATOM    728  HA  VAL A 347      42.500  39.570  30.050  1.00  0.00           H
ATOM    729  CB  VAL A 347      41.020  39.700  31.620  1.00  0.00           C
ATOM    730  HB  VAL A 347      40.170  39.380  31.020  1.00  0.00           H
ATOM    731  CG1 VAL A 347      41.550  38.450  32.300  1.00  0.00           C
ATOM    732 1HG1 VAL A 347      41.850  37.620  31.660  1.00  0.00           H
ATOM    733 2HG1 VAL A 347      42.440  38.670  32.890  1.00  0.00           H
ATOM    734 3HG1 VAL A 347      40.740  38.120  32.950  1.00  0.00           H
ATOM    735  CG2 VAL A 347      40.490  40.720  32.700  1.00  0.00           C
ATOM    736 1HG2 VAL A 347      39.910  41.490  32.190  1.00  0.00           H
ATOM    737 2HG2 VAL A 347      39.790  40.270  33.400  1.00  0.00           H
ATOM    738 3HG2 VAL A 347      41.380  41.120  33.180  1.00  0.00           H
ATOM    739  C   VAL A 347      41.330  41.340  29.800  1.00  0.00           C
ATOM    740  O   VAL A 347      41.440  42.540  30.040  1.00  0.00           O
ATOM    741  N   ALA A 348      40.720  40.910  28.690  1.00  0.00           N
ATOM    742  H   ALA A 348      40.510  39.920  28.710  1.00  0.00           H
ATOM    743  CA  ALA A 348      40.090  41.850  27.780  1.00  0.00           C
ATOM    744  HA  ALA A 348      40.590  42.820  27.910  1.00  0.00           H
ATOM    745  CB  ALA A 348      40.330  41.440  26.340  1.00  0.00           C
ATOM    746  HB1 ALA A 348      39.990  42.260  25.710  1.00  0.00           H
ATOM    747  HB2 ALA A 348      41.370  41.310  26.060  1.00  0.00           H
ATOM    748  HB3 ALA A 348      39.690  40.590  26.120  1.00  0.00           H
ATOM    749  C   ALA A 348      38.670  42.010  28.150  1.00  0.00           C
ATOM    750  O   ALA A 348      38.010  41.230  28.840  1.00  0.00           O
ATOM    751  N   VAL A 349      38.020  43.050  27.680  1.00  0.00           N
ATOM    752  H   VAL A 349      38.560  43.790  27.260  1.00  0.00           H
ATOM    753  CA  VAL A 349      36.590  43.380  27.960  1.00  0.00           C
ATOM    754  HA  VAL A 349      36.020  42.460  28.120  1.00  0.00           H
ATOM    755  CB  VAL A 349      36.440  44.300  29.140  1.00  0.00           C
ATOM    756  HB  VAL A 349      36.940  45.250  28.950  1.00  0.00           H
ATOM    757  CG1 VAL A 349      34.920  44.620  29.650  1.00  0.00           C
ATOM    758 1HG1 VAL A 349      34.490  43.830  30.260  1.00  0.00           H
ATOM    759 2HG1 VAL A 349      35.020  45.510  30.280  1.00  0.00           H
ATOM    760 3HG1 VAL A 349      34.190  44.860  28.880  1.00  0.00           H
ATOM    761  CG2 VAL A 349      37.030  43.620  30.410  1.00  0.00           C
ATOM    762 1HG2 VAL A 349      36.550  42.650  30.580  1.00  0.00           H
ATOM    763 2HG2 VAL A 349      38.100  43.480  30.290  1.00  0.00           H
ATOM    764 3HG2 VAL A 349      37.040  44.260  31.300  1.00  0.00           H
ATOM    765  C   VAL A 349      35.940  44.020  26.760  1.00  0.00           C
ATOM    766  O   VAL A 349      36.600  44.780  26.030  1.00  0.00           O
ATOM    767  N   LYS A 350      34.650  43.730  26.630  1.00  0.00           N
ATOM    768  H   LYS A 350      34.190  43.120  27.290  1.00  0.00           H
ATOM    769  CA  LYS A 350      33.790  44.300  25.520  1.00  0.00           C
ATOM    770  HA  LYS A 350      34.470  44.930  24.940  1.00  0.00           H
ATOM    771  CB  LYS A 350      33.260  43.240  24.550  1.00  0.00           C
ATOM    772  HB1 LYS A 350      32.400  42.710  24.970  1.00  0.00           H
ATOM    773  HB2 LYS A 350      34.110  42.590  24.380  1.00  0.00           H
ATOM    774  CG  LYS A 350      32.690  44.020  23.380  1.00  0.00           C
ATOM    775  HG1 LYS A 350      33.420  44.700  22.920  1.00  0.00           H
ATOM    776  HG2 LYS A 350      31.840  44.630  23.680  1.00  0.00           H
ATOM    777  CD  LYS A 350      32.160  43.040  22.330  1.00  0.00           C
ATOM    778  HD1 LYS A 350      31.360  42.440  22.770  1.00  0.00           H
ATOM    779  HD2 LYS A 350      33.010  42.440  22.000  1.00  0.00           H
ATOM    780  CE  LYS A 350      31.550  44.000  21.280  1.00  0.00           C
ATOM    781  HE1 LYS A 350      32.300  44.620  20.800  1.00  0.00           H
ATOM    782  HE2 LYS A 350      30.840  44.560  21.890  1.00  0.00           H
ATOM    783  NZ  LYS A 350      30.700  43.270  20.300  1.00  0.00           N
ATOM    784  HZ1 LYS A 350      30.220  43.900  19.680  1.00  0.00           H
ATOM    785  HZ2 LYS A 350      31.270  42.710  19.690  1.00  0.00           H
ATOM    786  HZ3 LYS A 350      30.060  42.610  20.720  1.00  0.00           H
ATOM    787  C   LYS A 350      32.630  45.040  26.180  1.00  0.00           C
ATOM    788  O   LYS A 350      31.950  44.520  27.040  1.00  0.00           O
ATOM    789  N   LYS A 351      32.350  46.280  25.740  1.00  0.00           N
ATOM    790  H   LYS A 351      32.960  46.750  25.090  1.00  0.00           H
ATOM    791  CA  LYS A 351      31.380  47.110  26.410  1.00  0.00           C
ATOM    792  HA  LYS A 351      30.810  46.570  27.160  1.00  0.00           H
ATOM    793  CB  LYS A 351      32.190  48.160  27.170  1.00  0.00           C
ATOM    794  HB1 LYS A 351      31.520  48.750  27.800  1.00  0.00           H
ATOM    795  HB2 LYS A 351      32.520  48.910  26.460  1.00  0.00           H
ATOM    796  CG  LYS A 351      33.420  47.790  28.010  1.00  0.00           C
ATOM    797  HG1 LYS A 351      34.160  47.390  27.310  1.00  0.00           H
ATOM    798  HG2 LYS A 351      33.080  47.110  28.800  1.00  0.00           H
ATOM    799  CD  LYS A 351      34.090  49.010  28.700  1.00  0.00           C
ATOM    800  HD1 LYS A 351      34.840  48.730  29.440  1.00  0.00           H
ATOM    801  HD2 LYS A 351      33.350  49.550  29.290  1.00  0.00           H
ATOM    802  CE  LYS A 351      34.570  50.160  27.810  1.00  0.00           C
ATOM    803  HE1 LYS A 351      33.780  50.450  27.110  1.00  0.00           H
ATOM    804  HE2 LYS A 351      35.430  49.890  27.200  1.00  0.00           H
ATOM    805  NZ  LYS A 351      35.050  51.370  28.580  1.00  0.00           N
ATOM    806  HZ1 LYS A 351      35.630  51.030  29.340  1.00  0.00           H
ATOM    807  HZ2 LYS A 351      35.620  51.940  27.970  1.00  0.00           H
ATOM    808  HZ3 LYS A 351      34.290  51.880  29.010  1.00  0.00           H
ATOM    809  C   LYS A 351      30.520  47.760  25.400  1.00  0.00           C
ATOM    810  O   LYS A 351      31.030  48.380  24.480  1.00  0.00           O
ATOM    811  N   MET A 352      29.160  47.710  25.540  1.00  0.00           N
ATOM    812  H   MET A 352      28.810  47.280  26.390  1.00  0.00           H
ATOM    813  CA  MET A 352      28.180  48.090  24.560  1.00  0.00           C
ATOM    814  HA  MET A 352      28.660  48.630  23.750  1.00  0.00           H
ATOM    815  CB  MET A 352      27.650  46.810  23.770  1.00  0.00           C
ATOM    816  HB1 MET A 352      26.830  47.110  23.120  1.00  0.00           H
ATOM    817  HB2 MET A 352      27.140  46.150  24.470  1.00  0.00           H
ATOM    818  CG  MET A 352      28.720  45.860  23.090  1.00  0.00           C
ATOM    819  HG1 MET A 352      29.710  45.960  23.520  1.00  0.00           H
ATOM    820  HG2 MET A 352      28.820  46.210  22.060  1.00  0.00           H
ATOM    821  SD  MET A 352      28.430  44.050  23.010  1.00  0.00           S
ATOM    822  CE  MET A 352      28.710  43.640  24.720  1.00  0.00           C
ATOM    823  HE1 MET A 352      29.660  44.020  25.080  1.00  0.00           H
ATOM    824  HE2 MET A 352      28.050  44.260  25.330  1.00  0.00           H
ATOM    825  HE3 MET A 352      28.490  42.570  24.830  1.00  0.00           H
ATOM    826  C   MET A 352      27.100  48.970  25.200  1.00  0.00           C
ATOM    827  O   MET A 352      26.590  48.650  26.190  1.00  0.00           O
ATOM    828  N   ASP A 353      26.810  50.130  24.650  1.00  0.00           N
ATOM    829  H   ASP A 353      27.480  50.500  24.000  1.00  0.00           H
ATOM    830  CA  ASP A 353      25.720  51.050  25.150  1.00  0.00           C
ATOM    831  HA  ASP A 353      25.780  51.240  26.220  1.00  0.00           H
ATOM    832  CB  ASP A 353      26.010  52.410  24.530  1.00  0.00           C
ATOM    833  HB1 ASP A 353      25.830  52.390  23.460  1.00  0.00           H
ATOM    834  HB2 ASP A 353      27.070  52.530  24.740  1.00  0.00           H
ATOM    835  CG  ASP A 353      25.240  53.580  25.230  1.00  0.00           C
ATOM    836  OD1 ASP A 353      25.770  54.680  25.100  1.00  0.00           O
ATOM    837  OD2 ASP A 353      24.190  53.410  25.840  1.00  0.00           O
ATOM    838  C   ASP A 353      24.370  50.490  24.640  1.00  0.00           C
ATOM    839  O   ASP A 353      24.280  50.060  23.470  1.00  0.00           O
ATOM    840  N   LEU A 354      23.270  50.720  25.430  1.00  0.00           N
ATOM    841  H   LEU A 354      23.390  51.170  26.330  1.00  0.00           H
ATOM    842  CA  LEU A 354      22.010  50.070  25.130  1.00  0.00           C
ATOM    843  HA  LEU A 354      22.010  49.350  24.310  1.00  0.00           H
ATOM    844  CB  LEU A 354      21.500  49.320  26.400  1.00  0.00           C
ATOM    845  HB1 LEU A 354      20.540  48.860  26.190  1.00  0.00           H
ATOM    846  HB2 LEU A 354      21.400  50.010  27.240  1.00  0.00           H
ATOM    847  CG  LEU A 354      22.390  48.150  26.850  1.00  0.00           C
ATOM    848  HG  LEU A 354      23.420  48.460  27.040  1.00  0.00           H
ATOM    849  CD1 LEU A 354      21.790  47.450  28.140  1.00  0.00           C
ATOM    850 1HD1 LEU A 354      22.600  46.740  28.340  1.00  0.00           H
ATOM    851 2HD1 LEU A 354      21.790  48.200  28.940  1.00  0.00           H
ATOM    852 3HD1 LEU A 354      20.810  47.030  27.940  1.00  0.00           H
ATOM    853  CD2 LEU A 354      22.500  46.980  25.870  1.00  0.00           C
ATOM    854 1HD2 LEU A 354      23.120  46.170  26.240  1.00  0.00           H
ATOM    855 2HD2 LEU A 354      21.460  46.690  25.690  1.00  0.00           H
ATOM    856 3HD2 LEU A 354      22.900  47.400  24.940  1.00  0.00           H
ATOM    857  C   LEU A 354      21.010  51.090  24.580  1.00  0.00           C
ATOM    858  O   LEU A 354      19.960  50.670  24.110  1.00  0.00           O
ATOM    859  N   ARG A 355      21.220  52.370  24.750  1.00  0.00           N
ATOM    860  H   ARG A 355      22.150  52.540  25.100  1.00  0.00           H
ATOM    861  CA  ARG A 355      20.240  53.490  24.520  1.00  0.00           C
ATOM    862  HA  ARG A 355      19.290  53.280  25.020  1.00  0.00           H
ATOM    863  CB  ARG A 355      20.940  54.810  25.040  1.00  0.00           C
ATOM    864  HB1 ARG A 355      20.270  55.630  24.810  1.00  0.00           H
ATOM    865  HB2 ARG A 355      21.920  55.020  24.600  1.00  0.00           H
ATOM    866  CG  ARG A 355      21.080  54.610  26.530  1.00  0.00           C
ATOM    867  HG1 ARG A 355      21.700  53.750  26.790  1.00  0.00           H
ATOM    868  HG2 ARG A 355      20.060  54.590  26.910  1.00  0.00           H
ATOM    869  CD  ARG A 355      21.760  55.810  27.090  1.00  0.00           C
ATOM    870  HD1 ARG A 355      21.730  55.670  28.170  1.00  0.00           H
ATOM    871  HD2 ARG A 355      21.190  56.720  26.890  1.00  0.00           H
ATOM    872  NE  ARG A 355      23.160  55.970  26.650  1.00  0.00           N
ATOM    873  HE  ARG A 355      23.660  55.240  26.180  1.00  0.00           H
ATOM    874  CZ  ARG A 355      23.880  57.040  26.820  1.00  0.00           C
ATOM    875  NH1 ARG A 355      25.000  57.170  26.140  1.00  0.00           N
ATOM    876 1HH1 ARG A 355      25.290  56.490  25.450  1.00  0.00           H
ATOM    877 2HH1 ARG A 355      25.510  58.030  26.240  1.00  0.00           H
ATOM    878  NH2 ARG A 355      23.580  58.110  27.500  1.00  0.00           N
ATOM    879 1HH2 ARG A 355      22.820  58.080  28.170  1.00  0.00           H
ATOM    880 2HH2 ARG A 355      24.110  58.960  27.370  1.00  0.00           H
ATOM    881  C   ARG A 355      19.840  53.520  23.000  1.00  0.00           C
ATOM    882  O   ARG A 355      18.640  53.600  22.690  1.00  0.00           O
ATOM    883  N   LYS A 356      20.830  53.500  22.080  1.00  0.00           N
ATOM    884  H   LYS A 356      21.800  53.440  22.370  1.00  0.00           H
ATOM    885  CA  LYS A 356      20.520  53.660  20.640  1.00  0.00           C
ATOM    886  HA  LYS A 356      19.610  54.260  20.540  1.00  0.00           H
ATOM    887  CB  LYS A 356      21.610  54.310  19.800  1.00  0.00           C
ATOM    888  HB1 LYS A 356      21.510  54.340  18.720  1.00  0.00           H
ATOM    889  HB2 LYS A 356      22.520  53.730  19.940  1.00  0.00           H
ATOM    890  CG  LYS A 356      21.740  55.800  20.290  1.00  0.00           C
ATOM    891  HG1 LYS A 356      20.920  56.030  20.980  1.00  0.00           H
ATOM    892  HG2 LYS A 356      21.600  56.450  19.430  1.00  0.00           H
ATOM    893  CD  LYS A 356      23.020  56.140  21.110  1.00  0.00           C
ATOM    894  HD1 LYS A 356      23.930  55.930  20.540  1.00  0.00           H
ATOM    895  HD2 LYS A 356      23.100  55.640  22.070  1.00  0.00           H
ATOM    896  CE  LYS A 356      22.980  57.610  21.360  1.00  0.00           C
ATOM    897  HE1 LYS A 356      22.180  57.670  22.100  1.00  0.00           H
ATOM    898  HE2 LYS A 356      22.770  58.180  20.460  1.00  0.00           H
ATOM    899  NZ  LYS A 356      24.110  58.250  22.020  1.00  0.00           N
ATOM    900  HZ1 LYS A 356      24.020  59.250  22.120  1.00  0.00           H
ATOM    901  HZ2 LYS A 356      24.360  57.870  22.920  1.00  0.00           H
ATOM    902  HZ3 LYS A 356      24.950  58.070  21.490  1.00  0.00           H
ATOM    903  C   LYS A 356      20.110  52.380  19.970  1.00  0.00           C
ATOM    904  O   LYS A 356      19.230  52.310  19.140  1.00  0.00           O
ATOM    905  N   GLN A 357      20.670  51.290  20.460  1.00  0.00           N
ATOM    906  H   GLN A 357      21.300  51.510  21.220  1.00  0.00           H
ATOM    907  CA  GLN A 357      20.680  49.970  19.810  1.00  0.00           C
ATOM    908  HA  GLN A 357      19.930  50.040  19.030  1.00  0.00           H
ATOM    909  CB  GLN A 357      22.100  49.640  19.180  1.00  0.00           C
ATOM    910  HB1 GLN A 357      22.150  50.170  18.230  1.00  0.00           H
ATOM    911  HB2 GLN A 357      22.120  48.560  19.040  1.00  0.00           H
ATOM    912  CG  GLN A 357      23.260  49.860  20.150  1.00  0.00           C
ATOM    913  HG1 GLN A 357      22.950  49.530  21.140  1.00  0.00           H
ATOM    914  HG2 GLN A 357      23.330  50.940  20.050  1.00  0.00           H
ATOM    915  CD  GLN A 357      24.570  49.190  19.740  1.00  0.00           C
ATOM    916  OE1 GLN A 357      24.960  48.850  18.630  1.00  0.00           O
ATOM    917  NE2 GLN A 357      25.300  48.890  20.780  1.00  0.00           N
ATOM    918 1HE2 GLN A 357      25.030  49.280  21.670  1.00  0.00           H
ATOM    919 2HE2 GLN A 357      26.180  48.420  20.690  1.00  0.00           H
ATOM    920  C   GLN A 357      20.110  48.780  20.650  1.00  0.00           C
ATOM    921  O   GLN A 357      20.420  48.710  21.860  1.00  0.00           O
ATOM    922  N   GLN A 358      19.320  47.900  20.040  1.00  0.00           N
ATOM    923  H   GLN A 358      19.050  48.250  19.130  1.00  0.00           H
ATOM    924  CA  GLN A 358      18.620  46.760  20.620  1.00  0.00           C
ATOM    925  HA  GLN A 358      19.200  46.440  21.480  1.00  0.00           H
ATOM    926  CB  GLN A 358      17.340  47.190  21.180  1.00  0.00           C
ATOM    927  HB1 GLN A 358      16.900  46.340  21.700  1.00  0.00           H
ATOM    928  HB2 GLN A 358      16.630  47.460  20.400  1.00  0.00           H
ATOM    929  CG  GLN A 358      17.200  48.280  22.200  1.00  0.00           C
ATOM    930  HG1 GLN A 358      18.090  48.230  22.830  1.00  0.00           H
ATOM    931  HG2 GLN A 358      16.350  48.110  22.860  1.00  0.00           H
ATOM    932  CD  GLN A 358      17.200  49.630  21.560  1.00  0.00           C
ATOM    933  OE1 GLN A 358      16.510  49.880  20.550  1.00  0.00           O
ATOM    934  NE2 GLN A 358      17.920  50.660  22.060  1.00  0.00           N
ATOM    935 1HE2 GLN A 358      18.640  50.460  22.740  1.00  0.00           H
ATOM    936 2HE2 GLN A 358      17.700  51.610  21.800  1.00  0.00           H
ATOM    937  C   GLN A 358      18.400  45.550  19.730  1.00  0.00           C
ATOM    938  O   GLN A 358      17.670  44.660  20.130  1.00  0.00           O
ATOM    939  N   ARG A 359      19.100  45.520  18.610  1.00  0.00           N
ATOM    940  H   ARG A 359      19.650  46.340  18.410  1.00  0.00           H
ATOM    941  CA  ARG A 359      19.060  44.340  17.660  1.00  0.00           C
ATOM    942  HA  ARG A 359      18.000  44.270  17.380  1.00  0.00           H
ATOM    943  CB  ARG A 359      19.910  44.520  16.320  1.00  0.00           C
ATOM    944  HB1 ARG A 359      20.960  44.500  16.630  1.00  0.00           H
ATOM    945  HB2 ARG A 359      19.620  45.470  15.870  1.00  0.00           H
ATOM    946  CG  ARG A 359      19.750  43.520  15.220  1.00  0.00           C
ATOM    947  HG1 ARG A 359      18.710  43.200  15.120  1.00  0.00           H
ATOM    948  HG2 ARG A 359      20.340  42.620  15.410  1.00  0.00           H
ATOM    949  CD  ARG A 359      20.220  44.080  13.880  1.00  0.00           C
ATOM    950  HD1 ARG A 359      21.310  44.090  13.890  1.00  0.00           H
ATOM    951  HD2 ARG A 359      19.730  45.050  13.740  1.00  0.00           H
ATOM    952  NE  ARG A 359      19.890  43.180  12.770  1.00  0.00           N
ATOM    953  HE  ARG A 359      19.000  42.700  12.870  1.00  0.00           H
ATOM    954  CZ  ARG A 359      20.570  42.870  11.680  1.00  0.00           C
ATOM    955  NH1 ARG A 359      20.110  41.880  11.000  1.00  0.00           N
ATOM    956 1HH1 ARG A 359      19.370  41.330  11.390  1.00  0.00           H
ATOM    957 2HH1 ARG A 359      20.540  41.630  10.110  1.00  0.00           H
ATOM    958  NH2 ARG A 359      21.580  43.540  11.230  1.00  0.00           N
ATOM    959 1HH2 ARG A 359      21.760  44.480  11.560  1.00  0.00           H
ATOM    960 2HH2 ARG A 359      21.830  43.290  10.280  1.00  0.00           H
ATOM    961  C   ARG A 359      19.490  43.040  18.410  1.00  0.00           C
ATOM    962  O   ARG A 359      20.680  42.920  18.680  1.00  0.00           O
ATOM    963  N   ARG A 360      18.600  42.040  18.570  1.00  0.00           N
ATOM    964  H   ARG A 360      17.640  42.290  18.360  1.00  0.00           H
ATOM    965  CA  ARG A 360      18.810  40.820  19.370  1.00  0.00           C
ATOM    966  HA  ARG A 360      19.100  41.130  20.370  1.00  0.00           H
ATOM    967  CB  ARG A 360      17.580  39.920  19.550  1.00  0.00           C
ATOM    968  HB1 ARG A 360      17.980  38.950  19.840  1.00  0.00           H
ATOM    969  HB2 ARG A 360      17.130  39.930  18.550  1.00  0.00           H
ATOM    970  CG  ARG A 360      16.610  40.270  20.700  1.00  0.00           C
ATOM    971  HG1 ARG A 360      16.750  39.790  21.670  1.00  0.00           H
ATOM    972  HG2 ARG A 360      15.670  39.830  20.370  1.00  0.00           H
ATOM    973  CD  ARG A 360      16.310  41.810  20.910  1.00  0.00           C
ATOM    974  HD1 ARG A 360      16.060  42.260  19.950  1.00  0.00           H
ATOM    975  HD2 ARG A 360      17.220  42.250  21.320  1.00  0.00           H
ATOM    976  NE  ARG A 360      15.240  42.080  21.860  1.00  0.00           N
ATOM    977  HE  ARG A 360      15.040  41.380  22.560  1.00  0.00           H
ATOM    978  CZ  ARG A 360      14.640  43.220  21.970  1.00  0.00           C
ATOM    979  NH1 ARG A 360      14.960  44.240  21.240  1.00  0.00           N
ATOM    980 1HH1 ARG A 360      15.830  44.300  20.720  1.00  0.00           H
ATOM    981 2HH1 ARG A 360      14.490  45.120  21.400  1.00  0.00           H
ATOM    982  NH2 ARG A 360      13.710  43.330  22.890  1.00  0.00           N
ATOM    983 1HH2 ARG A 360      13.280  42.460  23.170  1.00  0.00           H
ATOM    984 2HH2 ARG A 360      13.250  44.220  23.000  1.00  0.00           H
ATOM    985  C   ARG A 360      19.980  40.020  18.830  1.00  0.00           C
ATOM    986  O   ARG A 360      20.840  39.670  19.630  1.00  0.00           O
ATOM    987  N   GLU A 361      20.100  39.830  17.530  1.00  0.00           N
ATOM    988  H   GLU A 361      19.340  40.160  16.960  1.00  0.00           H
ATOM    989  CA  GLU A 361      21.190  39.060  16.830  1.00  0.00           C
ATOM    990  HA  GLU A 361      21.300  38.190  17.470  1.00  0.00           H
ATOM    991  CB  GLU A 361      20.630  38.450  15.530  1.00  0.00           C
ATOM    992  HB1 GLU A 361      19.610  38.110  15.740  1.00  0.00           H
ATOM    993  HB2 GLU A 361      21.220  37.620  15.160  1.00  0.00           H
ATOM    994  CG  GLU A 361      20.490  39.510  14.400  1.00  0.00           C
ATOM    995  HG1 GLU A 361      21.470  39.930  14.160  1.00  0.00           H
ATOM    996  HG2 GLU A 361      19.820  40.310  14.710  1.00  0.00           H
ATOM    997  CD  GLU A 361      20.070  38.900  13.130  1.00  0.00           C
ATOM    998  OE1 GLU A 361      20.730  37.960  12.590  1.00  0.00           O
ATOM    999  OE2 GLU A 361      18.940  39.220  12.640  1.00  0.00           O
ATOM   1000  C   GLU A 361      22.510  39.710  16.680  1.00  0.00           C
ATOM   1001  O   GLU A 361      23.300  39.290  15.840  1.00  0.00           O
ATOM   1002  N   LEU A 362      22.670  40.830  17.440  1.00  0.00           N
ATOM   1003  H   LEU A 362      21.920  40.960  18.110  1.00  0.00           H
ATOM   1004  CA  LEU A 362      23.970  41.530  17.630  1.00  0.00           C
ATOM   1005  HA  LEU A 362      24.760  41.060  17.050  1.00  0.00           H
ATOM   1006  CB  LEU A 362      23.800  42.920  17.110  1.00  0.00           C
ATOM   1007  HB1 LEU A 362      24.270  43.620  17.800  1.00  0.00           H
ATOM   1008  HB2 LEU A 362      22.760  43.270  17.140  1.00  0.00           H
ATOM   1009  CG  LEU A 362      24.280  43.220  15.660  1.00  0.00           C
ATOM   1010  HG  LEU A 362      25.320  42.940  15.480  1.00  0.00           H
ATOM   1011  CD1 LEU A 362      23.440  42.470  14.630  1.00  0.00           C
ATOM   1012 1HD1 LEU A 362      23.660  41.400  14.670  1.00  0.00           H
ATOM   1013 2HD1 LEU A 362      22.390  42.490  14.910  1.00  0.00           H
ATOM   1014 3HD1 LEU A 362      23.600  42.700  13.580  1.00  0.00           H
ATOM   1015  CD2 LEU A 362      24.090  44.780  15.470  1.00  0.00           C
ATOM   1016 1HD2 LEU A 362      24.310  45.070  14.440  1.00  0.00           H
ATOM   1017 2HD2 LEU A 362      23.130  45.160  15.800  1.00  0.00           H
ATOM   1018 3HD2 LEU A 362      24.770  45.390  16.070  1.00  0.00           H
ATOM   1019  C   LEU A 362      24.380  41.540  19.070  1.00  0.00           C
ATOM   1020  O   LEU A 362      25.600  41.480  19.350  1.00  0.00           O
ATOM   1021  N   LEU A 363      23.400  41.690  19.930  1.00  0.00           N
ATOM   1022  H   LEU A 363      22.470  41.850  19.550  1.00  0.00           H
ATOM   1023  CA  LEU A 363      23.590  42.050  21.310  1.00  0.00           C
ATOM   1024  HA  LEU A 363      24.630  42.230  21.590  1.00  0.00           H
ATOM   1025  CB  LEU A 363      22.920  43.420  21.470  1.00  0.00           C
ATOM   1026  HB1 LEU A 363      22.790  43.630  22.530  1.00  0.00           H
ATOM   1027  HB2 LEU A 363      21.920  43.340  21.050  1.00  0.00           H
ATOM   1028  CG  LEU A 363      23.720  44.600  20.880  1.00  0.00           C
ATOM   1029  HG  LEU A 363      24.170  44.320  19.930  1.00  0.00           H
ATOM   1030  CD1 LEU A 363      22.690  45.700  20.620  1.00  0.00           C
ATOM   1031 1HD1 LEU A 363      23.180  46.560  20.160  1.00  0.00           H
ATOM   1032 2HD1 LEU A 363      21.840  45.380  20.020  1.00  0.00           H
ATOM   1033 3HD1 LEU A 363      22.260  46.020  21.570  1.00  0.00           H
ATOM   1034  CD2 LEU A 363      24.760  45.200  21.810  1.00  0.00           C
ATOM   1035 1HD2 LEU A 363      25.500  44.410  21.990  1.00  0.00           H
ATOM   1036 2HD2 LEU A 363      25.300  46.030  21.360  1.00  0.00           H
ATOM   1037 3HD2 LEU A 363      24.320  45.540  22.750  1.00  0.00           H
ATOM   1038  C   LEU A 363      23.150  41.060  22.370  1.00  0.00           C
ATOM   1039  O   LEU A 363      23.710  41.110  23.500  1.00  0.00           O
ATOM   1040  N   PHE A 364      22.380  40.050  22.020  1.00  0.00           N
ATOM   1041  H   PHE A 364      21.970  40.100  21.100  1.00  0.00           H
ATOM   1042  CA  PHE A 364      22.100  38.890  22.850  1.00  0.00           C
ATOM   1043  HA  PHE A 364      22.270  39.260  23.870  1.00  0.00           H
ATOM   1044  CB  PHE A 364      20.650  38.390  22.690  1.00  0.00           C
ATOM   1045  HB1 PHE A 364      20.720  37.620  21.920  1.00  0.00           H
ATOM   1046  HB2 PHE A 364      20.090  39.230  22.270  1.00  0.00           H
ATOM   1047  CG  PHE A 364      20.050  37.820  24.010  1.00  0.00           C
ATOM   1048  CD1 PHE A 364      19.250  38.640  24.870  1.00  0.00           C
ATOM   1049  HD1 PHE A 364      19.080  39.690  24.680  1.00  0.00           H
ATOM   1050  CE1 PHE A 364      18.810  38.140  26.120  1.00  0.00           C
ATOM   1051  HE1 PHE A 364      18.160  38.770  26.710  1.00  0.00           H
ATOM   1052  CZ  PHE A 364      19.050  36.810  26.480  1.00  0.00           C
ATOM   1053  HZ  PHE A 364      18.710  36.520  27.460  1.00  0.00           H
ATOM   1054  CE2 PHE A 364      19.920  35.990  25.700  1.00  0.00           C
ATOM   1055  HE2 PHE A 364      20.170  35.000  26.050  1.00  0.00           H
ATOM   1056  CD2 PHE A 364      20.370  36.500  24.500  1.00  0.00           C
ATOM   1057  HD2 PHE A 364      21.030  35.880  23.910  1.00  0.00           H
ATOM   1058  C   PHE A 364      23.100  37.700  22.520  1.00  0.00           C
ATOM   1059  O   PHE A 364      22.840  36.500  22.740  1.00  0.00           O
ATOM   1060  N   ASN A 365      24.250  38.060  21.890  1.00  0.00           N
ATOM   1061  H   ASN A 365      24.380  39.050  21.710  1.00  0.00           H
ATOM   1062  CA  ASN A 365      25.260  37.160  21.330  1.00  0.00           C
ATOM   1063  HA  ASN A 365      24.810  36.190  21.150  1.00  0.00           H
ATOM   1064  CB  ASN A 365      25.850  37.670  20.010  1.00  0.00           C
ATOM   1065  HB1 ASN A 365      26.640  36.980  19.700  1.00  0.00           H
ATOM   1066  HB2 ASN A 365      26.460  38.580  20.020  1.00  0.00           H
ATOM   1067  CG  ASN A 365      24.800  37.780  18.930  1.00  0.00           C
ATOM   1068  OD1 ASN A 365      23.700  37.170  19.040  1.00  0.00           O
ATOM   1069  ND2 ASN A 365      25.150  38.380  17.810  1.00  0.00           N
ATOM   1070 1HD2 ASN A 365      25.950  38.990  17.880  1.00  0.00           H
ATOM   1071 2HD2 ASN A 365      24.530  38.360  17.010  1.00  0.00           H
ATOM   1072  C   ASN A 365      26.420  36.810  22.250  1.00  0.00           C
ATOM   1073  O   ASN A 365      26.550  35.740  22.840  1.00  0.00           O
ATOM   1074  N   GLU A 366      27.240  37.780  22.570  1.00  0.00           N
ATOM   1075  H   GLU A 366      27.150  38.630  22.030  1.00  0.00           H
ATOM   1076  CA  GLU A 366      28.460  37.610  23.320  1.00  0.00           C
ATOM   1077  HA  GLU A 366      28.840  36.630  23.040  1.00  0.00           H
ATOM   1078  CB  GLU A 366      29.560  38.690  22.980  1.00  0.00           C
ATOM   1079  HB1 GLU A 366      30.450  38.430  23.560  1.00  0.00           H
ATOM   1080  HB2 GLU A 366      29.170  39.690  23.180  1.00  0.00           H
ATOM   1081  CG  GLU A 366      29.750  38.650  21.440  1.00  0.00           C
ATOM   1082  HG1 GLU A 366      28.790  38.620  20.930  1.00  0.00           H
ATOM   1083  HG2 GLU A 366      30.200  37.690  21.180  1.00  0.00           H
ATOM   1084  CD  GLU A 366      30.570  39.740  20.910  1.00  0.00           C
ATOM   1085  OE1 GLU A 366      31.730  39.540  20.620  1.00  0.00           O
ATOM   1086  OE2 GLU A 366      29.940  40.790  20.730  1.00  0.00           O
ATOM   1087  C   GLU A 366      28.220  37.550  24.870  1.00  0.00           C
ATOM   1088  O   GLU A 366      29.040  37.070  25.680  1.00  0.00           O
ATOM   1089  N   VAL A 367      27.050  37.980  25.340  1.00  0.00           N
ATOM   1090  H   VAL A 367      26.440  38.270  24.590  1.00  0.00           H
ATOM   1091  CA  VAL A 367      26.590  37.950  26.740  1.00  0.00           C
ATOM   1092  HA  VAL A 367      27.340  38.450  27.360  1.00  0.00           H
ATOM   1093  CB  VAL A 367      25.310  38.770  26.850  1.00  0.00           C
ATOM   1094  HB  VAL A 367      25.490  39.760  26.430  1.00  0.00           H
ATOM   1095  CG1 VAL A 367      24.100  38.170  26.110  1.00  0.00           C
ATOM   1096 1HG1 VAL A 367      24.410  38.030  25.070  1.00  0.00           H
ATOM   1097 2HG1 VAL A 367      23.800  37.250  26.590  1.00  0.00           H
ATOM   1098 3HG1 VAL A 367      23.250  38.860  26.050  1.00  0.00           H
ATOM   1099  CG2 VAL A 367      24.890  38.960  28.330  1.00  0.00           C
ATOM   1100 1HG2 VAL A 367      25.710  39.430  28.880  1.00  0.00           H
ATOM   1101 2HG2 VAL A 367      24.090  39.700  28.250  1.00  0.00           H
ATOM   1102 3HG2 VAL A 367      24.480  38.100  28.860  1.00  0.00           H
ATOM   1103  C   VAL A 367      26.380  36.430  27.130  1.00  0.00           C
ATOM   1104  O   VAL A 367      26.470  36.100  28.330  1.00  0.00           O
ATOM   1105  N   VAL A 368      26.040  35.460  26.190  1.00  0.00           N
ATOM   1106  H   VAL A 368      26.010  35.700  25.210  1.00  0.00           H
ATOM   1107  CA  VAL A 368      25.740  34.000  26.460  1.00  0.00           C
ATOM   1108  HA  VAL A 368      26.120  33.710  27.430  1.00  0.00           H
ATOM   1109  CB  VAL A 368      24.170  33.660  26.500  1.00  0.00           C
ATOM   1110  HB  VAL A 368      24.020  32.590  26.580  1.00  0.00           H
ATOM   1111  CG1 VAL A 368      23.440  34.320  27.630  1.00  0.00           C
ATOM   1112 1HG1 VAL A 368      22.420  33.940  27.650  1.00  0.00           H
ATOM   1113 2HG1 VAL A 368      23.880  34.160  28.610  1.00  0.00           H
ATOM   1114 3HG1 VAL A 368      23.460  35.410  27.640  1.00  0.00           H
ATOM   1115  CG2 VAL A 368      23.520  33.960  25.180  1.00  0.00           C
ATOM   1116 1HG2 VAL A 368      23.740  35.000  24.950  1.00  0.00           H
ATOM   1117 2HG2 VAL A 368      23.780  33.320  24.350  1.00  0.00           H
ATOM   1118 3HG2 VAL A 368      22.440  33.930  25.380  1.00  0.00           H
ATOM   1119  C   VAL A 368      26.470  32.960  25.590  1.00  0.00           C
ATOM   1120  O   VAL A 368      26.560  31.820  26.090  1.00  0.00           O
ATOM   1121  N   ILE A 369      26.780  33.260  24.290  1.00  0.00           N
ATOM   1122  H   ILE A 369      26.450  34.160  23.970  1.00  0.00           H
ATOM   1123  CA  ILE A 369      27.130  32.220  23.280  1.00  0.00           C
ATOM   1124  HA  ILE A 369      26.210  31.630  23.330  1.00  0.00           H
ATOM   1125  CB  ILE A 369      27.230  32.970  21.950  1.00  0.00           C
ATOM   1126  HB  ILE A 369      26.340  33.590  21.820  1.00  0.00           H
ATOM   1127  CG2 ILE A 369      28.500  33.790  21.890  1.00  0.00           C
ATOM   1128 1HG2 ILE A 369      29.410  33.190  21.840  1.00  0.00           H
ATOM   1129 2HG2 ILE A 369      28.280  34.400  21.010  1.00  0.00           H
ATOM   1130 3HG2 ILE A 369      28.700  34.440  22.740  1.00  0.00           H
ATOM   1131  CG1 ILE A 369      27.180  32.000  20.750  1.00  0.00           C
ATOM   1132 1HG1 ILE A 369      28.090  31.420  20.570  1.00  0.00           H
ATOM   1133 2HG1 ILE A 369      27.140  32.620  19.850  1.00  0.00           H
ATOM   1134  CD  ILE A 369      25.970  31.000  20.880  1.00  0.00           C
ATOM   1135  HD1 ILE A 369      25.100  31.600  21.160  1.00  0.00           H
ATOM   1136  HD2 ILE A 369      25.750  30.420  19.980  1.00  0.00           H
ATOM   1137  HD3 ILE A 369      26.220  30.280  21.650  1.00  0.00           H
ATOM   1138  C   ILE A 369      28.290  31.260  23.540  1.00  0.00           C
ATOM   1139  O   ILE A 369      28.410  30.190  22.910  1.00  0.00           O
ATOM   1140  N   MET A 370      29.210  31.670  24.480  1.00  0.00           N
ATOM   1141  H   MET A 370      29.170  32.670  24.610  1.00  0.00           H
ATOM   1142  CA  MET A 370      30.360  31.000  25.090  1.00  0.00           C
ATOM   1143  HA  MET A 370      30.320  30.030  24.600  1.00  0.00           H
ATOM   1144  CB  MET A 370      31.660  31.780  24.720  1.00  0.00           C
ATOM   1145  HB1 MET A 370      32.490  31.210  25.150  1.00  0.00           H
ATOM   1146  HB2 MET A 370      31.760  32.730  25.250  1.00  0.00           H
ATOM   1147  CG  MET A 370      31.970  31.860  23.210  1.00  0.00           C
ATOM   1148  HG1 MET A 370      33.000  32.160  23.030  1.00  0.00           H
ATOM   1149  HG2 MET A 370      31.330  32.590  22.720  1.00  0.00           H
ATOM   1150  SD  MET A 370      31.850  30.300  22.410  1.00  0.00           S
ATOM   1151  CE  MET A 370      31.400  30.900  20.750  1.00  0.00           C
ATOM   1152  HE1 MET A 370      30.810  30.070  20.350  1.00  0.00           H
ATOM   1153  HE2 MET A 370      30.680  31.720  20.700  1.00  0.00           H
ATOM   1154  HE3 MET A 370      32.240  31.230  20.140  1.00  0.00           H
ATOM   1155  C   MET A 370      30.220  30.600  26.580  1.00  0.00           C
ATOM   1156  O   MET A 370      31.170  30.190  27.240  1.00  0.00           O
ATOM   1157  N   ARG A 371      29.010  30.660  27.160  1.00  0.00           N
ATOM   1158  H   ARG A 371      28.210  30.990  26.640  1.00  0.00           H
ATOM   1159  CA  ARG A 371      28.710  29.900  28.380  1.00  0.00           C
ATOM   1160  HA  ARG A 371      29.630  29.850  28.970  1.00  0.00           H
ATOM   1161  CB  ARG A 371      27.570  30.600  29.120  1.00  0.00           C
ATOM   1162  HB1 ARG A 371      27.450  30.000  30.020  1.00  0.00           H
ATOM   1163  HB2 ARG A 371      26.660  30.400  28.550  1.00  0.00           H
ATOM   1164  CG  ARG A 371      27.770  32.100  29.510  1.00  0.00           C
ATOM   1165  HG1 ARG A 371      28.110  32.710  28.680  1.00  0.00           H
ATOM   1166  HG2 ARG A 371      28.600  32.130  30.220  1.00  0.00           H
ATOM   1167  CD  ARG A 371      26.580  32.770  30.140  1.00  0.00           C
ATOM   1168  HD1 ARG A 371      26.180  32.200  30.980  1.00  0.00           H
ATOM   1169  HD2 ARG A 371      25.760  32.790  29.410  1.00  0.00           H
ATOM   1170  NE  ARG A 371      26.880  34.110  30.570  1.00  0.00           N
ATOM   1171  HE  ARG A 371      26.840  34.770  29.800  1.00  0.00           H
ATOM   1172  CZ  ARG A 371      27.300  34.490  31.790  1.00  0.00           C
ATOM   1173  NH1 ARG A 371      27.590  33.730  32.780  1.00  0.00           N
ATOM   1174 1HH1 ARG A 371      27.360  32.740  32.750  1.00  0.00           H
ATOM   1175 2HH1 ARG A 371      27.770  34.180  33.660  1.00  0.00           H
ATOM   1176  NH2 ARG A 371      27.390  35.740  32.180  1.00  0.00           N
ATOM   1177 1HH2 ARG A 371      27.060  36.500  31.600  1.00  0.00           H
ATOM   1178 2HH2 ARG A 371      27.820  35.910  33.070  1.00  0.00           H
ATOM   1179  C   ARG A 371      28.320  28.420  28.140  1.00  0.00           C
ATOM   1180  O   ARG A 371      27.910  28.130  27.030  1.00  0.00           O
ATOM   1181  N   ASP A 372      28.640  27.530  29.040  1.00  0.00           N
ATOM   1182  H   ASP A 372      29.140  27.780  29.880  1.00  0.00           H
ATOM   1183  CA  ASP A 372      28.490  26.090  28.880  1.00  0.00           C
ATOM   1184  HA  ASP A 372      29.130  25.610  29.620  1.00  0.00           H
ATOM   1185  CB  ASP A 372      27.150  25.440  29.080  1.00  0.00           C
ATOM   1186  HB1 ASP A 372      27.480  24.410  29.130  1.00  0.00           H
ATOM   1187  HB2 ASP A 372      26.530  25.610  28.200  1.00  0.00           H
ATOM   1188  CG  ASP A 372      26.340  25.850  30.290  1.00  0.00           C
ATOM   1189  OD1 ASP A 372      25.220  26.270  30.170  1.00  0.00           O
ATOM   1190  OD2 ASP A 372      26.910  25.590  31.400  1.00  0.00           O
ATOM   1191  C   ASP A 372      29.140  25.570  27.530  1.00  0.00           C
ATOM   1192  O   ASP A 372      28.750  24.510  27.040  1.00  0.00           O
ATOM   1193  N   TYR A 373      30.230  26.200  27.160  1.00  0.00           N
ATOM   1194  H   TYR A 373      30.290  27.100  27.620  1.00  0.00           H
ATOM   1195  CA  TYR A 373      31.030  25.790  25.960  1.00  0.00           C
ATOM   1196  HA  TYR A 373      30.730  24.770  25.720  1.00  0.00           H
ATOM   1197  CB  TYR A 373      30.610  26.620  24.790  1.00  0.00           C
ATOM   1198  HB1 TYR A 373      30.800  27.670  24.990  1.00  0.00           H
ATOM   1199  HB2 TYR A 373      29.550  26.400  24.590  1.00  0.00           H
ATOM   1200  CG  TYR A 373      31.270  26.210  23.530  1.00  0.00           C
ATOM   1201  CD1 TYR A 373      30.660  25.380  22.570  1.00  0.00           C
ATOM   1202  HD1 TYR A 373      29.750  24.890  22.860  1.00  0.00           H
ATOM   1203  CE1 TYR A 373      31.220  25.170  21.270  1.00  0.00           C
ATOM   1204  HE1 TYR A 373      30.770  24.540  20.520  1.00  0.00           H
ATOM   1205  CZ  TYR A 373      32.500  25.730  21.020  1.00  0.00           C
ATOM   1206  OH  TYR A 373      33.070  25.410  19.870  1.00  0.00           O
ATOM   1207  HH  TYR A 373      33.860  25.950  19.810  1.00  0.00           H
ATOM   1208  CE2 TYR A 373      33.110  26.570  22.010  1.00  0.00           C
ATOM   1209  HE2 TYR A 373      34.100  26.980  21.880  1.00  0.00           H
ATOM   1210  CD2 TYR A 373      32.470  26.810  23.150  1.00  0.00           C
ATOM   1211  HD2 TYR A 373      32.890  27.610  23.730  1.00  0.00           H
ATOM   1212  C   TYR A 373      32.550  25.960  26.270  1.00  0.00           C
ATOM   1213  O   TYR A 373      32.980  27.000  26.730  1.00  0.00           O
ATOM   1214  N   GLN A 374      33.480  25.000  26.030  1.00  0.00           N
ATOM   1215  H   GLN A 374      33.140  24.130  25.640  1.00  0.00           H
ATOM   1216  CA  GLN A 374      34.930  25.130  26.040  1.00  0.00           C
ATOM   1217  HA  GLN A 374      35.210  26.180  26.090  1.00  0.00           H
ATOM   1218  CB  GLN A 374      35.500  24.480  27.280  1.00  0.00           C
ATOM   1219  HB1 GLN A 374      35.050  25.030  28.110  1.00  0.00           H
ATOM   1220  HB2 GLN A 374      36.580  24.570  27.330  1.00  0.00           H
ATOM   1221  CG  GLN A 374      34.970  23.040  27.550  1.00  0.00           C
ATOM   1222  HG1 GLN A 374      35.220  22.310  26.770  1.00  0.00           H
ATOM   1223  HG2 GLN A 374      33.890  23.160  27.650  1.00  0.00           H
ATOM   1224  CD  GLN A 374      35.440  22.490  28.890  1.00  0.00           C
ATOM   1225  OE1 GLN A 374      36.400  23.030  29.450  1.00  0.00           O
ATOM   1226  NE2 GLN A 374      34.810  21.490  29.470  1.00  0.00           N
ATOM   1227 1HE2 GLN A 374      33.980  21.080  29.060  1.00  0.00           H
ATOM   1228 2HE2 GLN A 374      35.160  20.910  30.220  1.00  0.00           H
ATOM   1229  C   GLN A 374      35.540  24.530  24.710  1.00  0.00           C
ATOM   1230  O   GLN A 374      35.000  23.510  24.320  1.00  0.00           O
ATOM   1231  N   HIS A 375      36.660  25.120  24.210  1.00  0.00           N
ATOM   1232  H   HIS A 375      37.080  25.840  24.780  1.00  0.00           H
ATOM   1233  CA  HIS A 375      37.270  24.590  22.940  1.00  0.00           C
ATOM   1234  HA  HIS A 375      37.290  23.500  22.920  1.00  0.00           H
ATOM   1235  CB  HIS A 375      36.440  25.080  21.700  1.00  0.00           C
ATOM   1236  HB1 HIS A 375      36.480  26.160  21.540  1.00  0.00           H
ATOM   1237  HB2 HIS A 375      35.400  24.770  21.770  1.00  0.00           H
ATOM   1238  CG  HIS A 375      36.890  24.450  20.430  1.00  0.00           C
ATOM   1239  ND1 HIS A 375      37.780  24.970  19.500  1.00  0.00           N
ATOM   1240  CE1 HIS A 375      37.940  23.970  18.660  1.00  0.00           C
ATOM   1241  HE1 HIS A 375      38.470  24.030  17.720  1.00  0.00           H
ATOM   1242  NE2 HIS A 375      37.300  22.870  18.970  1.00  0.00           N
ATOM   1243  HE2 HIS A 375      37.220  22.030  18.420  1.00  0.00           H
ATOM   1244  CD2 HIS A 375      36.590  23.160  20.150  1.00  0.00           C
ATOM   1245  HD2 HIS A 375      35.940  22.500  20.710  1.00  0.00           H
ATOM   1246  C   HIS A 375      38.660  25.230  22.780  1.00  0.00           C
ATOM   1247  O   HIS A 375      38.850  26.370  23.180  1.00  0.00           O
ATOM   1248  N   GLU A 376      39.610  24.500  22.160  1.00  0.00           N
ATOM   1249  H   GLU A 376      39.370  23.540  21.940  1.00  0.00           H
ATOM   1250  CA  GLU A 376      41.010  24.960  22.180  1.00  0.00           C
ATOM   1251  HA  GLU A 376      41.280  25.190  23.210  1.00  0.00           H
ATOM   1252  CB  GLU A 376      41.960  23.890  21.760  1.00  0.00           C
ATOM   1253  HB1 GLU A 376      42.960  24.230  21.480  1.00  0.00           H
ATOM   1254  HB2 GLU A 376      41.580  23.370  20.880  1.00  0.00           H
ATOM   1255  CG  GLU A 376      42.090  22.870  22.940  1.00  0.00           C
ATOM   1256  HG1 GLU A 376      41.970  23.300  23.940  1.00  0.00           H
ATOM   1257  HG2 GLU A 376      43.090  22.430  22.890  1.00  0.00           H
ATOM   1258  CD  GLU A 376      41.150  21.750  22.700  1.00  0.00           C
ATOM   1259  OE1 GLU A 376      40.050  21.680  23.280  1.00  0.00           O
ATOM   1260  OE2 GLU A 376      41.500  20.850  21.970  1.00  0.00           O
ATOM   1261  C   GLU A 376      41.170  26.230  21.370  1.00  0.00           C
ATOM   1262  O   GLU A 376      42.210  26.900  21.510  1.00  0.00           O
ATOM   1263  N   ASN A 377      40.290  26.410  20.390  1.00  0.00           N
ATOM   1264  H   ASN A 377      39.600  25.680  20.300  1.00  0.00           H
ATOM   1265  CA  ASN A 377      40.390  27.490  19.380  1.00  0.00           C
ATOM   1266  HA  ASN A 377      41.290  28.110  19.480  1.00  0.00           H
ATOM   1267  CB  ASN A 377      40.640  26.700  18.040  1.00  0.00           C
ATOM   1268  HB1 ASN A 377      40.750  27.450  17.260  1.00  0.00           H
ATOM   1269  HB2 ASN A 377      39.840  25.970  17.940  1.00  0.00           H
ATOM   1270  CG  ASN A 377      41.830  25.870  18.010  1.00  0.00           C
ATOM   1271  OD1 ASN A 377      41.760  24.640  18.030  1.00  0.00           O
ATOM   1272  ND2 ASN A 377      42.990  26.480  17.930  1.00  0.00           N
ATOM   1273 1HD2 ASN A 377      43.030  27.450  17.660  1.00  0.00           H
ATOM   1274 2HD2 ASN A 377      43.740  25.840  17.700  1.00  0.00           H
ATOM   1275  C   ASN A 377      39.230  28.510  19.370  1.00  0.00           C
ATOM   1276  O   ASN A 377      39.000  29.200  18.360  1.00  0.00           O
ATOM   1277  N   VAL A 378      38.500  28.650  20.460  1.00  0.00           N
ATOM   1278  H   VAL A 378      38.750  28.200  21.330  1.00  0.00           H
ATOM   1279  CA  VAL A 378      37.510  29.790  20.540  1.00  0.00           C
ATOM   1280  HA  VAL A 378      37.750  30.540  19.780  1.00  0.00           H
ATOM   1281  CB  VAL A 378      36.060  29.300  20.420  1.00  0.00           C
ATOM   1282  HB  VAL A 378      35.790  28.700  21.290  1.00  0.00           H
ATOM   1283  CG1 VAL A 378      35.050  30.480  20.270  1.00  0.00           C
ATOM   1284 1HG1 VAL A 378      35.320  31.030  19.370  1.00  0.00           H
ATOM   1285 2HG1 VAL A 378      34.050  30.060  20.220  1.00  0.00           H
ATOM   1286 3HG1 VAL A 378      35.110  31.150  21.120  1.00  0.00           H
ATOM   1287  CG2 VAL A 378      35.890  28.330  19.180  1.00  0.00           C
ATOM   1288 1HG2 VAL A 378      36.450  27.410  19.380  1.00  0.00           H
ATOM   1289 2HG2 VAL A 378      34.860  28.030  19.010  1.00  0.00           H
ATOM   1290 3HG2 VAL A 378      36.180  28.660  18.180  1.00  0.00           H
ATOM   1291  C   VAL A 378      37.700  30.520  21.860  1.00  0.00           C
ATOM   1292  O   VAL A 378      37.960  29.870  22.890  1.00  0.00           O
ATOM   1293  N   VAL A 379      37.740  31.820  21.770  1.00  0.00           N
ATOM   1294  H   VAL A 379      37.540  32.340  20.930  1.00  0.00           H
ATOM   1295  CA  VAL A 379      38.050  32.720  22.920  1.00  0.00           C
ATOM   1296  HA  VAL A 379      39.020  32.350  23.260  1.00  0.00           H
ATOM   1297  CB  VAL A 379      38.100  34.210  22.500  1.00  0.00           C
ATOM   1298  HB  VAL A 379      37.340  34.420  21.740  1.00  0.00           H
ATOM   1299  CG1 VAL A 379      38.000  35.250  23.590  1.00  0.00           C
ATOM   1300 1HG1 VAL A 379      37.010  35.200  24.040  1.00  0.00           H
ATOM   1301 2HG1 VAL A 379      38.730  35.290  24.390  1.00  0.00           H
ATOM   1302 3HG1 VAL A 379      37.940  36.240  23.120  1.00  0.00           H
ATOM   1303  CG2 VAL A 379      39.430  34.450  21.830  1.00  0.00           C
ATOM   1304 1HG2 VAL A 379      39.530  34.090  20.810  1.00  0.00           H
ATOM   1305 2HG2 VAL A 379      39.720  35.500  21.910  1.00  0.00           H
ATOM   1306 3HG2 VAL A 379      40.250  33.920  22.310  1.00  0.00           H
ATOM   1307  C   VAL A 379      37.100  32.430  24.030  1.00  0.00           C
ATOM   1308  O   VAL A 379      35.880  32.200  23.830  1.00  0.00           O
ATOM   1309  N   GLU A 380      37.680  32.390  25.180  1.00  0.00           N
ATOM   1310  H   GLU A 380      38.680  32.520  25.230  1.00  0.00           H
ATOM   1311  CA  GLU A 380      37.000  32.240  26.500  1.00  0.00           C
ATOM   1312  HA  GLU A 380      36.190  31.520  26.340  1.00  0.00           H
ATOM   1313  CB  GLU A 380      37.900  31.640  27.510  1.00  0.00           C
ATOM   1314  HB1 GLU A 380      38.690  32.350  27.790  1.00  0.00           H
ATOM   1315  HB2 GLU A 380      38.350  30.740  27.090  1.00  0.00           H
ATOM   1316  CG  GLU A 380      37.290  31.110  28.760  1.00  0.00           C
ATOM   1317  HG1 GLU A 380      36.440  30.510  28.440  1.00  0.00           H
ATOM   1318  HG2 GLU A 380      36.820  31.860  29.390  1.00  0.00           H
ATOM   1319  CD  GLU A 380      38.220  30.180  29.550  1.00  0.00           C
ATOM   1320  OE1 GLU A 380      37.820  29.100  30.040  1.00  0.00           O
ATOM   1321  OE2 GLU A 380      39.420  30.500  29.650  1.00  0.00           O
ATOM   1322  C   GLU A 380      36.450  33.570  26.990  1.00  0.00           C
ATOM   1323  O   GLU A 380      37.110  34.620  26.890  1.00  0.00           O
ATOM   1324  N   MET A 381      35.210  33.510  27.460  1.00  0.00           N
ATOM   1325  H   MET A 381      34.790  32.600  27.430  1.00  0.00           H
ATOM   1326  CA  MET A 381      34.360  34.660  27.890  1.00  0.00           C
ATOM   1327  HA  MET A 381      35.040  35.500  28.010  1.00  0.00           H
ATOM   1328  CB  MET A 381      33.300  34.860  26.810  1.00  0.00           C
ATOM   1329  HB1 MET A 381      32.670  35.710  27.070  1.00  0.00           H
ATOM   1330  HB2 MET A 381      32.610  34.020  26.770  1.00  0.00           H
ATOM   1331  CG  MET A 381      33.850  34.950  25.400  1.00  0.00           C
ATOM   1332  HG1 MET A 381      34.370  34.020  25.200  1.00  0.00           H
ATOM   1333  HG2 MET A 381      34.490  35.820  25.260  1.00  0.00           H
ATOM   1334  SD  MET A 381      32.700  35.110  23.980  1.00  0.00           S
ATOM   1335  CE  MET A 381      33.860  34.820  22.580  1.00  0.00           C
ATOM   1336  HE1 MET A 381      33.320  34.770  21.630  1.00  0.00           H
ATOM   1337  HE2 MET A 381      34.440  35.740  22.590  1.00  0.00           H
ATOM   1338  HE3 MET A 381      34.430  33.920  22.830  1.00  0.00           H
ATOM   1339  C   MET A 381      33.670  34.380  29.210  1.00  0.00           C
ATOM   1340  O   MET A 381      32.520  33.940  29.340  1.00  0.00           O
ATOM   1341  N   TYR A 382      34.470  34.610  30.250  1.00  0.00           N
ATOM   1342  H   TYR A 382      35.350  35.010  29.960  1.00  0.00           H
ATOM   1343  CA  TYR A 382      34.360  34.410  31.730  1.00  0.00           C
ATOM   1344  HA  TYR A 382      34.560  33.340  31.860  1.00  0.00           H
ATOM   1345  CB  TYR A 382      35.540  35.130  32.440  1.00  0.00           C
ATOM   1346  HB1 TYR A 382      35.520  34.720  33.450  1.00  0.00           H
ATOM   1347  HB2 TYR A 382      35.340  36.200  32.540  1.00  0.00           H
ATOM   1348  CG  TYR A 382      36.860  34.990  31.860  1.00  0.00           C
ATOM   1349  CD1 TYR A 382      37.670  36.050  31.500  1.00  0.00           C
ATOM   1350  HD1 TYR A 382      37.200  37.020  31.500  1.00  0.00           H
ATOM   1351  CE1 TYR A 382      38.970  35.860  30.970  1.00  0.00           C
ATOM   1352  HE1 TYR A 382      39.580  36.710  30.700  1.00  0.00           H
ATOM   1353  CZ  TYR A 382      39.490  34.580  30.850  1.00  0.00           C
ATOM   1354  OH  TYR A 382      40.730  34.330  30.400  1.00  0.00           O
ATOM   1355  HH  TYR A 382      40.780  33.380  30.260  1.00  0.00           H
ATOM   1356  CE2 TYR A 382      38.650  33.440  31.120  1.00  0.00           C
ATOM   1357  HE2 TYR A 382      38.960  32.440  30.870  1.00  0.00           H
ATOM   1358  CD2 TYR A 382      37.420  33.700  31.670  1.00  0.00           C
ATOM   1359  HD2 TYR A 382      36.840  32.790  31.790  1.00  0.00           H
ATOM   1360  C   TYR A 382      33.020  34.800  32.330  1.00  0.00           C
ATOM   1361  O   TYR A 382      32.390  33.980  32.970  1.00  0.00           O
ATOM   1362  N   ASN A 383      32.530  35.950  32.080  1.00  0.00           N
ATOM   1363  H   ASN A 383      33.150  36.440  31.450  1.00  0.00           H
ATOM   1364  CA  ASN A 383      31.430  36.640  32.740  1.00  0.00           C
ATOM   1365  HA  ASN A 383      30.540  36.020  32.870  1.00  0.00           H
ATOM   1366  CB  ASN A 383      31.970  37.220  34.060  1.00  0.00           C
ATOM   1367  HB1 ASN A 383      31.230  37.890  34.490  1.00  0.00           H
ATOM   1368  HB2 ASN A 383      32.910  37.720  33.820  1.00  0.00           H
ATOM   1369  CG  ASN A 383      32.190  36.150  35.120  1.00  0.00           C
ATOM   1370  OD1 ASN A 383      33.350  35.790  35.390  1.00  0.00           O
ATOM   1371  ND2 ASN A 383      31.140  35.510  35.520  1.00  0.00           N
ATOM   1372 1HD2 ASN A 383      30.260  35.930  35.260  1.00  0.00           H
ATOM   1373 2HD2 ASN A 383      31.270  34.790  36.220  1.00  0.00           H
ATOM   1374  C   ASN A 383      30.960  37.750  31.760  1.00  0.00           C
ATOM   1375  O   ASN A 383      31.690  38.250  30.920  1.00  0.00           O
ATOM   1376  N   SER A 384      29.700  38.080  32.010  1.00  0.00           N
ATOM   1377  H   SER A 384      29.130  37.490  32.590  1.00  0.00           H
ATOM   1378  CA  SER A 384      29.040  39.270  31.330  1.00  0.00           C
ATOM   1379  HA  SER A 384      29.810  39.990  31.060  1.00  0.00           H
ATOM   1380  CB  SER A 384      28.260  38.900  30.100  1.00  0.00           C
ATOM   1381  HB1 SER A 384      28.960  38.590  29.320  1.00  0.00           H
ATOM   1382  HB2 SER A 384      27.780  39.780  29.670  1.00  0.00           H
ATOM   1383  OG  SER A 384      27.310  37.890  30.290  1.00  0.00           O
ATOM   1384  HG  SER A 384      27.040  37.470  29.470  1.00  0.00           H
ATOM   1385  C   SER A 384      28.110  39.900  32.340  1.00  0.00           C
ATOM   1386  O   SER A 384      27.490  39.180  33.090  1.00  0.00           O
ATOM   1387  N   TYR A 385      28.100  41.250  32.420  1.00  0.00           N
ATOM   1388  H   TYR A 385      28.420  41.730  31.590  1.00  0.00           H
ATOM   1389  CA  TYR A 385      27.430  42.110  33.400  1.00  0.00           C
ATOM   1390  HA  TYR A 385      26.850  41.500  34.090  1.00  0.00           H
ATOM   1391  CB  TYR A 385      28.440  42.760  34.300  1.00  0.00           C
ATOM   1392  HB1 TYR A 385      27.930  43.310  35.080  1.00  0.00           H
ATOM   1393  HB2 TYR A 385      28.970  43.520  33.720  1.00  0.00           H
ATOM   1394  CG  TYR A 385      29.520  41.900  34.950  1.00  0.00           C
ATOM   1395  CD1 TYR A 385      30.660  41.470  34.210  1.00  0.00           C
ATOM   1396  HD1 TYR A 385      30.800  41.700  33.170  1.00  0.00           H
ATOM   1397  CE1 TYR A 385      31.620  40.630  34.830  1.00  0.00           C
ATOM   1398  HE1 TYR A 385      32.440  40.180  34.290  1.00  0.00           H
ATOM   1399  CZ  TYR A 385      31.470  40.290  36.140  1.00  0.00           C
ATOM   1400  OH  TYR A 385      32.350  39.460  36.750  1.00  0.00           O
ATOM   1401  HH  TYR A 385      31.930  39.100  37.530  1.00  0.00           H
ATOM   1402  CE2 TYR A 385      30.330  40.680  36.930  1.00  0.00           C
ATOM   1403  HE2 TYR A 385      30.220  40.360  37.960  1.00  0.00           H
ATOM   1404  CD2 TYR A 385      29.320  41.450  36.260  1.00  0.00           C
ATOM   1405  HD2 TYR A 385      28.410  41.730  36.770  1.00  0.00           H
ATOM   1406  C   TYR A 385      26.570  43.210  32.770  1.00  0.00           C
ATOM   1407  O   TYR A 385      26.820  43.610  31.640  1.00  0.00           O
ATOM   1408  N   LEU A 386      25.640  43.730  33.580  1.00  0.00           N
ATOM   1409  H   LEU A 386      25.620  43.330  34.510  1.00  0.00           H
ATOM   1410  CA  LEU A 386      24.880  44.990  33.220  1.00  0.00           C
ATOM   1411  HA  LEU A 386      25.130  45.210  32.180  1.00  0.00           H
ATOM   1412  CB  LEU A 386      23.360  44.670  33.340  1.00  0.00           C
ATOM   1413  HB1 LEU A 386      23.060  44.560  34.380  1.00  0.00           H
ATOM   1414  HB2 LEU A 386      23.100  43.710  32.900  1.00  0.00           H
ATOM   1415  CG  LEU A 386      22.510  45.820  32.700  1.00  0.00           C
ATOM   1416  HG  LEU A 386      22.740  46.860  32.960  1.00  0.00           H
ATOM   1417  CD1 LEU A 386      22.610  45.800  31.230  1.00  0.00           C
ATOM   1418 1HD1 LEU A 386      21.870  46.480  30.810  1.00  0.00           H
ATOM   1419 2HD1 LEU A 386      23.590  46.130  30.910  1.00  0.00           H
ATOM   1420 3HD1 LEU A 386      22.440  44.790  30.840  1.00  0.00           H
ATOM   1421  CD2 LEU A 386      21.070  45.380  32.960  1.00  0.00           C
ATOM   1422 1HD2 LEU A 386      20.910  45.340  34.040  1.00  0.00           H
ATOM   1423 2HD2 LEU A 386      20.420  46.080  32.430  1.00  0.00           H
ATOM   1424 3HD2 LEU A 386      20.870  44.360  32.640  1.00  0.00           H
ATOM   1425  C   LEU A 386      25.210  46.180  34.100  1.00  0.00           C
ATOM   1426  O   LEU A 386      24.710  46.230  35.230  1.00  0.00           O
ATOM   1427  N   VAL A 387      25.880  47.210  33.560  1.00  0.00           N
ATOM   1428  H   VAL A 387      26.100  47.150  32.580  1.00  0.00           H
ATOM   1429  CA  VAL A 387      26.240  48.430  34.260  1.00  0.00           C
ATOM   1430  HA  VAL A 387      26.200  48.270  35.340  1.00  0.00           H
ATOM   1431  CB  VAL A 387      27.640  49.010  33.970  1.00  0.00           C
ATOM   1432  HB  VAL A 387      27.690  49.190  32.890  1.00  0.00           H
ATOM   1433  CG1 VAL A 387      27.860  50.330  34.690  1.00  0.00           C
ATOM   1434 1HG1 VAL A 387      27.330  51.120  34.150  1.00  0.00           H
ATOM   1435 2HG1 VAL A 387      27.520  50.150  35.710  1.00  0.00           H
ATOM   1436 3HG1 VAL A 387      28.920  50.570  34.630  1.00  0.00           H
ATOM   1437  CG2 VAL A 387      28.720  47.930  34.280  1.00  0.00           C
ATOM   1438 1HG2 VAL A 387      28.530  47.450  35.240  1.00  0.00           H
ATOM   1439 2HG2 VAL A 387      28.610  47.160  33.520  1.00  0.00           H
ATOM   1440 3HG2 VAL A 387      29.740  48.310  34.270  1.00  0.00           H
ATOM   1441  C   VAL A 387      25.170  49.490  33.840  1.00  0.00           C
ATOM   1442  O   VAL A 387      25.340  50.420  33.020  1.00  0.00           O
ATOM   1443  N   GLY A 388      23.940  49.120  34.260  1.00  0.00           N
ATOM   1444  H   GLY A 388      23.830  48.310  34.850  1.00  0.00           H
ATOM   1445  CA  GLY A 388      22.730  49.800  33.880  1.00  0.00           C
ATOM   1446  HA1 GLY A 388      22.700  50.800  34.330  1.00  0.00           H
ATOM   1447  HA2 GLY A 388      21.920  49.210  34.320  1.00  0.00           H
ATOM   1448  C   GLY A 388      22.410  49.880  32.350  1.00  0.00           C
ATOM   1449  O   GLY A 388      22.000  48.890  31.700  1.00  0.00           O
ATOM   1450  N   ASP A 389      22.460  51.060  31.770  1.00  0.00           N
ATOM   1451  H   ASP A 389      22.870  51.770  32.360  1.00  0.00           H
ATOM   1452  CA  ASP A 389      22.400  51.290  30.300  1.00  0.00           C
ATOM   1453  HA  ASP A 389      21.610  50.600  29.990  1.00  0.00           H
ATOM   1454  CB  ASP A 389      21.910  52.780  29.960  1.00  0.00           C
ATOM   1455  HB1 ASP A 389      21.480  52.770  28.950  1.00  0.00           H
ATOM   1456  HB2 ASP A 389      22.690  53.520  29.780  1.00  0.00           H
ATOM   1457  CG  ASP A 389      20.870  53.340  30.990  1.00  0.00           C
ATOM   1458  OD1 ASP A 389      19.680  53.380  30.580  1.00  0.00           O
ATOM   1459  OD2 ASP A 389      21.190  53.650  32.130  1.00  0.00           O
ATOM   1460  C   ASP A 389      23.580  50.740  29.460  1.00  0.00           C
ATOM   1461  O   ASP A 389      23.620  51.060  28.300  1.00  0.00           O
ATOM   1462  N   GLU A 390      24.600  50.060  30.000  1.00  0.00           N
ATOM   1463  H   GLU A 390      24.720  50.100  31.000  1.00  0.00           H
ATOM   1464  CA  GLU A 390      25.770  49.550  29.310  1.00  0.00           C
ATOM   1465  HA  GLU A 390      25.650  49.540  28.230  1.00  0.00           H
ATOM   1466  CB  GLU A 390      27.040  50.450  29.570  1.00  0.00           C
ATOM   1467  HB1 GLU A 390      27.290  50.240  30.610  1.00  0.00           H
ATOM   1468  HB2 GLU A 390      26.690  51.480  29.470  1.00  0.00           H
ATOM   1469  CG  GLU A 390      28.250  50.400  28.560  1.00  0.00           C
ATOM   1470  HG1 GLU A 390      27.860  50.860  27.650  1.00  0.00           H
ATOM   1471  HG2 GLU A 390      28.500  49.360  28.370  1.00  0.00           H
ATOM   1472  CD  GLU A 390      29.480  51.180  29.080  1.00  0.00           C
ATOM   1473  OE1 GLU A 390      29.920  52.130  28.340  1.00  0.00           O
ATOM   1474  OE2 GLU A 390      30.040  50.830  30.140  1.00  0.00           O
ATOM   1475  C   GLU A 390      25.920  48.060  29.620  1.00  0.00           C
ATOM   1476  O   GLU A 390      25.650  47.760  30.750  1.00  0.00           O
ATOM   1477  N   LEU A 391      26.340  47.230  28.610  1.00  0.00           N
ATOM   1478  H   LEU A 391      26.400  47.710  27.720  1.00  0.00           H
ATOM   1479  CA  LEU A 391      26.480  45.750  28.720  1.00  0.00           C
ATOM   1480  HA  LEU A 391      26.140  45.410  29.700  1.00  0.00           H
ATOM   1481  CB  LEU A 391      25.630  45.110  27.570  1.00  0.00           C
ATOM   1482  HB1 LEU A 391      25.970  45.600  26.660  1.00  0.00           H
ATOM   1483  HB2 LEU A 391      24.620  45.530  27.640  1.00  0.00           H
ATOM   1484  CG  LEU A 391      25.710  43.640  27.280  1.00  0.00           C
ATOM   1485  HG  LEU A 391      26.780  43.420  27.270  1.00  0.00           H
ATOM   1486  CD1 LEU A 391      24.890  43.000  28.370  1.00  0.00           C
ATOM   1487 1HD1 LEU A 391      23.850  43.340  28.410  1.00  0.00           H
ATOM   1488 2HD1 LEU A 391      24.890  41.930  28.160  1.00  0.00           H
ATOM   1489 3HD1 LEU A 391      25.400  43.150  29.330  1.00  0.00           H
ATOM   1490  CD2 LEU A 391      25.060  43.240  25.900  1.00  0.00           C
ATOM   1491 1HD2 LEU A 391      24.120  43.800  25.850  1.00  0.00           H
ATOM   1492 2HD2 LEU A 391      25.690  43.600  25.090  1.00  0.00           H
ATOM   1493 3HD2 LEU A 391      24.950  42.160  25.850  1.00  0.00           H
ATOM   1494  C   LEU A 391      27.960  45.330  28.640  1.00  0.00           C
ATOM   1495  O   LEU A 391      28.630  45.640  27.630  1.00  0.00           O
ATOM   1496  N   TRP A 392      28.480  44.640  29.670  1.00  0.00           N
ATOM   1497  H   TRP A 392      27.900  44.540  30.490  1.00  0.00           H
ATOM   1498  CA  TRP A 392      29.830  44.190  29.690  1.00  0.00           C
ATOM   1499  HA  TRP A 392      30.340  44.720  28.890  1.00  0.00           H
ATOM   1500  CB  TRP A 392      30.520  44.630  30.990  1.00  0.00           C
ATOM   1501  HB1 TRP A 392      31.430  44.040  31.030  1.00  0.00           H
ATOM   1502  HB2 TRP A 392      29.800  44.270  31.730  1.00  0.00           H
ATOM   1503  CG  TRP A 392      30.750  46.080  31.220  1.00  0.00           C
ATOM   1504  CD1 TRP A 392      29.990  47.050  30.770  1.00  0.00           C
ATOM   1505  HD1 TRP A 392      29.030  46.960  30.300  1.00  0.00           H
ATOM   1506  NE1 TRP A 392      30.580  48.290  31.010  1.00  0.00           N
ATOM   1507  HE1 TRP A 392      30.020  49.120  31.070  1.00  0.00           H
ATOM   1508  CE2 TRP A 392      31.850  48.160  31.600  1.00  0.00           C
ATOM   1509  CZ2 TRP A 392      32.790  49.050  32.070  1.00  0.00           C
ATOM   1510  HZ2 TRP A 392      32.590  50.110  31.970  1.00  0.00           H
ATOM   1511  CH2 TRP A 392      33.840  48.560  32.870  1.00  0.00           C
ATOM   1512  HH2 TRP A 392      34.580  49.230  33.280  1.00  0.00           H
ATOM   1513  CZ3 TRP A 392      34.050  47.160  32.960  1.00  0.00           C
ATOM   1514  HZ3 TRP A 392      34.890  46.760  33.500  1.00  0.00           H
ATOM   1515  CE3 TRP A 392      33.130  46.230  32.470  1.00  0.00           C
ATOM   1516  HE3 TRP A 392      33.320  45.180  32.590  1.00  0.00           H
ATOM   1517  CD2 TRP A 392      31.930  46.730  31.790  1.00  0.00           C
ATOM   1518  C   TRP A 392      29.960  42.710  29.400  1.00  0.00           C
ATOM   1519  O   TRP A 392      29.170  41.880  29.740  1.00  0.00           O
ATOM   1520  N   VAL A 393      31.120  42.360  28.860  1.00  0.00           N
ATOM   1521  H   VAL A 393      31.760  43.140  28.790  1.00  0.00           H
ATOM   1522  CA  VAL A 393      31.620  40.910  28.700  1.00  0.00           C
ATOM   1523  HA  VAL A 393      31.110  40.330  29.470  1.00  0.00           H
ATOM   1524  CB  VAL A 393      31.430  40.310  27.290  1.00  0.00           C
ATOM   1525  HB  VAL A 393      31.950  40.970  26.590  1.00  0.00           H
ATOM   1526  CG1 VAL A 393      32.080  38.910  27.040  1.00  0.00           C
ATOM   1527 1HG1 VAL A 393      31.870  38.560  26.030  1.00  0.00           H
ATOM   1528 2HG1 VAL A 393      33.160  38.970  27.160  1.00  0.00           H
ATOM   1529 3HG1 VAL A 393      31.740  38.250  27.840  1.00  0.00           H
ATOM   1530  CG2 VAL A 393      29.890  40.370  26.930  1.00  0.00           C
ATOM   1531 1HG2 VAL A 393      29.530  41.400  27.000  1.00  0.00           H
ATOM   1532 2HG2 VAL A 393      29.790  40.130  25.870  1.00  0.00           H
ATOM   1533 3HG2 VAL A 393      29.280  39.870  27.690  1.00  0.00           H
ATOM   1534  C   VAL A 393      33.120  40.940  29.060  1.00  0.00           C
ATOM   1535  O   VAL A 393      33.810  41.820  28.580  1.00  0.00           O
ATOM   1536  N   VAL A 394      33.610  39.940  29.800  1.00  0.00           N
ATOM   1537  H   VAL A 394      32.930  39.260  30.120  1.00  0.00           H
ATOM   1538  CA  VAL A 394      34.990  39.760  30.220  1.00  0.00           C
ATOM   1539  HA  VAL A 394      35.460  40.680  29.890  1.00  0.00           H
ATOM   1540  CB  VAL A 394      35.000  39.760  31.810  1.00  0.00           C
ATOM   1541  HB  VAL A 394      34.420  38.930  32.180  1.00  0.00           H
ATOM   1542  CG1 VAL A 394      36.420  39.820  32.420  1.00  0.00           C
ATOM   1543 1HG1 VAL A 394      36.840  40.820  32.330  1.00  0.00           H
ATOM   1544 2HG1 VAL A 394      36.460  39.700  33.510  1.00  0.00           H
ATOM   1545 3HG1 VAL A 394      37.070  39.130  31.890  1.00  0.00           H
ATOM   1546  CG2 VAL A 394      34.290  41.080  32.350  1.00  0.00           C
ATOM   1547 1HG2 VAL A 394      34.520  41.220  33.400  1.00  0.00           H
ATOM   1548 2HG2 VAL A 394      34.640  42.000  31.880  1.00  0.00           H
ATOM   1549 3HG2 VAL A 394      33.210  41.170  32.230  1.00  0.00           H
ATOM   1550  C   VAL A 394      35.620  38.500  29.550  1.00  0.00           C
ATOM   1551  O   VAL A 394      34.950  37.490  29.600  1.00  0.00           O
ATOM   1552  N   MET A 395      36.790  38.560  28.960  1.00  0.00           N
ATOM   1553  H   MET A 395      37.330  39.400  29.130  1.00  0.00           H
ATOM   1554  CA  MET A 395      37.430  37.480  28.170  1.00  0.00           C
ATOM   1555  HA  MET A 395      37.020  36.550  28.570  1.00  0.00           H
ATOM   1556  CB  MET A 395      36.960  37.740  26.720  1.00  0.00           C
ATOM   1557  HB1 MET A 395      35.880  37.560  26.730  1.00  0.00           H
ATOM   1558  HB2 MET A 395      37.350  36.970  26.060  1.00  0.00           H
ATOM   1559  CG  MET A 395      37.290  39.080  26.090  1.00  0.00           C
ATOM   1560  HG1 MET A 395      38.370  39.020  25.930  1.00  0.00           H
ATOM   1561  HG2 MET A 395      37.130  39.830  26.860  1.00  0.00           H
ATOM   1562  SD  MET A 395      36.290  39.310  24.570  1.00  0.00           S
ATOM   1563  CE  MET A 395      36.850  41.030  24.370  1.00  0.00           C
ATOM   1564  HE1 MET A 395      36.300  41.600  25.120  1.00  0.00           H
ATOM   1565  HE2 MET A 395      37.920  41.100  24.540  1.00  0.00           H
ATOM   1566  HE3 MET A 395      36.580  41.240  23.330  1.00  0.00           H
ATOM   1567  C   MET A 395      38.950  37.480  28.280  1.00  0.00           C
ATOM   1568  O   MET A 395      39.540  38.400  28.820  1.00  0.00           O
ATOM   1569  N   GLU A 396      39.590  36.440  27.740  1.00  0.00           N
ATOM   1570  H   GLU A 396      38.980  35.810  27.240  1.00  0.00           H
ATOM   1571  CA  GLU A 396      41.030  36.310  27.710  1.00  0.00           C
ATOM   1572  HA  GLU A 396      41.520  36.530  28.660  1.00  0.00           H
ATOM   1573  CB  GLU A 396      41.420  34.870  27.160  1.00  0.00           C
ATOM   1574  HB1 GLU A 396      41.150  34.810  26.100  1.00  0.00           H
ATOM   1575  HB2 GLU A 396      40.880  34.060  27.650  1.00  0.00           H
ATOM   1576  CG  GLU A 396      42.940  34.490  27.300  1.00  0.00           C
ATOM   1577  HG1 GLU A 396      43.290  34.690  28.310  1.00  0.00           H
ATOM   1578  HG2 GLU A 396      43.470  35.120  26.590  1.00  0.00           H
ATOM   1579  CD  GLU A 396      43.040  32.980  27.040  1.00  0.00           C
ATOM   1580  OE1 GLU A 396      42.990  32.120  27.950  1.00  0.00           O
ATOM   1581  OE2 GLU A 396      43.100  32.640  25.850  1.00  0.00           O
ATOM   1582  C   GLU A 396      41.670  37.420  26.840  1.00  0.00           C
ATOM   1583  O   GLU A 396      41.200  37.680  25.730  1.00  0.00           O
ATOM   1584  N   PHE A 397      42.730  38.050  27.270  1.00  0.00           N
ATOM   1585  H   PHE A 397      43.060  37.830  28.200  1.00  0.00           H
ATOM   1586  CA  PHE A 397      43.570  38.950  26.520  1.00  0.00           C
ATOM   1587  HA  PHE A 397      43.070  39.480  25.710  1.00  0.00           H
ATOM   1588  CB  PHE A 397      44.240  39.990  27.430  1.00  0.00           C
ATOM   1589  HB1 PHE A 397      44.790  39.510  28.240  1.00  0.00           H
ATOM   1590  HB2 PHE A 397      43.480  40.620  27.890  1.00  0.00           H
ATOM   1591  CG  PHE A 397      45.270  40.820  26.680  1.00  0.00           C
ATOM   1592  CD1 PHE A 397      45.040  41.680  25.650  1.00  0.00           C
ATOM   1593  HD1 PHE A 397      44.100  41.660  25.130  1.00  0.00           H
ATOM   1594  CE1 PHE A 397      46.010  42.500  25.130  1.00  0.00           C
ATOM   1595  HE1 PHE A 397      45.750  43.050  24.240  1.00  0.00           H
ATOM   1596  CZ  PHE A 397      47.300  42.450  25.590  1.00  0.00           C
ATOM   1597  HZ  PHE A 397      48.120  43.000  25.140  1.00  0.00           H
ATOM   1598  CE2 PHE A 397      47.590  41.630  26.660  1.00  0.00           C
ATOM   1599  HE2 PHE A 397      48.570  41.660  27.120  1.00  0.00           H
ATOM   1600  CD2 PHE A 397      46.580  40.820  27.170  1.00  0.00           C
ATOM   1601  HD2 PHE A 397      46.810  40.130  27.970  1.00  0.00           H
ATOM   1602  C   PHE A 397      44.610  38.090  25.800  1.00  0.00           C
ATOM   1603  O   PHE A 397      45.360  37.400  26.460  1.00  0.00           O
ATOM   1604  N   LEU A 398      44.680  38.140  24.460  1.00  0.00           N
ATOM   1605  H   LEU A 398      43.950  38.680  24.030  1.00  0.00           H
ATOM   1606  CA  LEU A 398      45.660  37.370  23.720  1.00  0.00           C
ATOM   1607  HA  LEU A 398      46.070  36.600  24.370  1.00  0.00           H
ATOM   1608  CB  LEU A 398      45.020  36.590  22.610  1.00  0.00           C
ATOM   1609  HB1 LEU A 398      45.800  36.140  22.010  1.00  0.00           H
ATOM   1610  HB2 LEU A 398      44.440  37.280  21.990  1.00  0.00           H
ATOM   1611  CG  LEU A 398      44.210  35.360  23.020  1.00  0.00           C
ATOM   1612  HG  LEU A 398      44.850  34.890  23.760  1.00  0.00           H
ATOM   1613  CD1 LEU A 398      42.820  35.660  23.570  1.00  0.00           C
ATOM   1614 1HD1 LEU A 398      42.380  36.450  22.960  1.00  0.00           H
ATOM   1615 2HD1 LEU A 398      42.180  34.790  23.420  1.00  0.00           H
ATOM   1616 3HD1 LEU A 398      42.830  35.940  24.620  1.00  0.00           H
ATOM   1617  CD2 LEU A 398      43.960  34.390  21.800  1.00  0.00           C
ATOM   1618 1HD2 LEU A 398      43.650  33.440  22.240  1.00  0.00           H
ATOM   1619 2HD2 LEU A 398      43.180  34.770  21.150  1.00  0.00           H
ATOM   1620 3HD2 LEU A 398      44.880  34.190  21.260  1.00  0.00           H
ATOM   1621  C   LEU A 398      46.730  38.290  23.250  1.00  0.00           C
ATOM   1622  O   LEU A 398      46.580  39.430  22.760  1.00  0.00           O
ATOM   1623  N   GLU A 399      47.960  37.870  23.500  1.00  0.00           N
ATOM   1624  H   GLU A 399      48.150  37.010  24.000  1.00  0.00           H
ATOM   1625  CA  GLU A 399      49.160  38.810  23.580  1.00  0.00           C
ATOM   1626  HA  GLU A 399      48.830  39.850  23.590  1.00  0.00           H
ATOM   1627  CB  GLU A 399      50.010  38.430  24.790  1.00  0.00           C
ATOM   1628  HB1 GLU A 399      50.980  38.900  24.620  1.00  0.00           H
ATOM   1629  HB2 GLU A 399      50.180  37.360  24.640  1.00  0.00           H
ATOM   1630  CG  GLU A 399      49.440  38.690  26.170  1.00  0.00           C
ATOM   1631  HG1 GLU A 399      48.350  38.630  26.110  1.00  0.00           H
ATOM   1632  HG2 GLU A 399      49.700  39.630  26.640  1.00  0.00           H
ATOM   1633  CD  GLU A 399      50.020  37.590  27.060  1.00  0.00           C
ATOM   1634  OE1 GLU A 399      49.310  36.530  27.090  1.00  0.00           O
ATOM   1635  OE2 GLU A 399      51.090  37.700  27.700  1.00  0.00           O
ATOM   1636  C   GLU A 399      49.940  38.760  22.200  1.00  0.00           C
ATOM   1637  O   GLU A 399      50.730  39.710  22.020  1.00  0.00           O
ATOM   1638  N   GLY A 400      49.630  37.890  21.220  1.00  0.00           N
ATOM   1639  H   GLY A 400      48.980  37.130  21.380  1.00  0.00           H
ATOM   1640  CA  GLY A 400      50.070  38.010  19.800  1.00  0.00           C
ATOM   1641  HA1 GLY A 400      50.160  37.030  19.330  1.00  0.00           H
ATOM   1642  HA2 GLY A 400      51.020  38.540  19.770  1.00  0.00           H
ATOM   1643  C   GLY A 400      49.130  38.780  18.880  1.00  0.00           C
ATOM   1644  O   GLY A 400      49.580  39.260  17.800  1.00  0.00           O
ATOM   1645  N   GLY A 401      47.940  39.030  19.330  1.00  0.00           N
ATOM   1646  H   GLY A 401      47.710  38.530  20.170  1.00  0.00           H
ATOM   1647  CA  GLY A 401      46.890  39.860  18.630  1.00  0.00           C
ATOM   1648  HA1 GLY A 401      47.320  40.830  18.380  1.00  0.00           H
ATOM   1649  HA2 GLY A 401      46.030  40.020  19.280  1.00  0.00           H
ATOM   1650  C   GLY A 401      46.280  39.290  17.390  1.00  0.00           C
ATOM   1651  O   GLY A 401      46.500  38.110  17.060  1.00  0.00           O
ATOM   1652  N   ALA A 402      45.520  40.180  16.670  1.00  0.00           N
ATOM   1653  H   ALA A 402      45.430  41.110  17.060  1.00  0.00           H
ATOM   1654  CA  ALA A 402      44.920  39.710  15.420  1.00  0.00           C
ATOM   1655  HA  ALA A 402      44.490  38.730  15.620  1.00  0.00           H
ATOM   1656  CB  ALA A 402      43.720  40.630  14.930  1.00  0.00           C
ATOM   1657  HB1 ALA A 402      42.970  40.670  15.730  1.00  0.00           H
ATOM   1658  HB2 ALA A 402      44.090  41.590  14.570  1.00  0.00           H
ATOM   1659  HB3 ALA A 402      43.130  40.100  14.180  1.00  0.00           H
ATOM   1660  C   ALA A 402      45.910  39.510  14.290  1.00  0.00           C
ATOM   1661  O   ALA A 402      46.860  40.290  14.160  1.00  0.00           O
ATOM   1662  N   LEU A 403      45.470  38.510  13.450  1.00  0.00           N
ATOM   1663  H   LEU A 403      44.650  38.040  13.800  1.00  0.00           H
ATOM   1664  CA  LEU A 403      46.020  38.160  12.110  1.00  0.00           C
ATOM   1665  HA  LEU A 403      47.060  37.930  12.330  1.00  0.00           H
ATOM   1666  CB  LEU A 403      45.180  37.000  11.480  1.00  0.00           C
ATOM   1667  HB1 LEU A 403      44.120  37.270  11.390  1.00  0.00           H
ATOM   1668  HB2 LEU A 403      45.200  36.120  12.130  1.00  0.00           H
ATOM   1669  CG  LEU A 403      45.720  36.590  10.140  1.00  0.00           C
ATOM   1670  HG  LEU A 403      45.640  37.390   9.410  1.00  0.00           H
ATOM   1671  CD1 LEU A 403      47.180  36.080  10.130  1.00  0.00           C
ATOM   1672 1HD1 LEU A 403      47.940  36.860  10.190  1.00  0.00           H
ATOM   1673 2HD1 LEU A 403      47.410  35.250  10.790  1.00  0.00           H
ATOM   1674 3HD1 LEU A 403      47.400  35.620   9.170  1.00  0.00           H
ATOM   1675  CD2 LEU A 403      44.770  35.510   9.650  1.00  0.00           C
ATOM   1676 1HD2 LEU A 403      44.680  34.630  10.280  1.00  0.00           H
ATOM   1677 2HD2 LEU A 403      43.790  35.980   9.780  1.00  0.00           H
ATOM   1678 3HD2 LEU A 403      45.060  35.250   8.640  1.00  0.00           H
ATOM   1679  C   LEU A 403      46.130  39.330  11.080  1.00  0.00           C
ATOM   1680  O   LEU A 403      47.140  39.440  10.380  1.00  0.00           O
ATOM   1681  N   THR A 404      45.150  40.220  11.060  1.00  0.00           N
ATOM   1682  H   THR A 404      44.360  40.160  11.690  1.00  0.00           H
ATOM   1683  CA  THR A 404      45.090  41.370  10.110  1.00  0.00           C
ATOM   1684  HA  THR A 404      44.940  40.910   9.140  1.00  0.00           H
ATOM   1685  CB  THR A 404      43.930  42.290  10.430  1.00  0.00           C
ATOM   1686  HB  THR A 404      43.990  42.520  11.500  1.00  0.00           H
ATOM   1687  CG2 THR A 404      43.900  43.610   9.630  1.00  0.00           C
ATOM   1688 1HG2 THR A 404      42.860  43.910   9.530  1.00  0.00           H
ATOM   1689 2HG2 THR A 404      44.550  44.360  10.070  1.00  0.00           H
ATOM   1690 3HG2 THR A 404      44.190  43.380   8.600  1.00  0.00           H
ATOM   1691  OG1 THR A 404      42.740  41.570  10.230  1.00  0.00           O
ATOM   1692  HG1 THR A 404      42.110  42.040  10.780  1.00  0.00           H
ATOM   1693  C   THR A 404      46.410  42.170  10.210  1.00  0.00           C
ATOM   1694  O   THR A 404      46.880  42.580   9.170  1.00  0.00           O
ATOM   1695  N   ASP A 405      46.920  42.460  11.410  1.00  0.00           N
ATOM   1696  H   ASP A 405      46.470  42.070  12.230  1.00  0.00           H
ATOM   1697  CA  ASP A 405      48.000  43.330  11.640  1.00  0.00           C
ATOM   1698  HA  ASP A 405      47.910  44.190  10.990  1.00  0.00           H
ATOM   1699  CB  ASP A 405      48.000  43.930  13.050  1.00  0.00           C
ATOM   1700  HB1 ASP A 405      48.130  43.110  13.750  1.00  0.00           H
ATOM   1701  HB2 ASP A 405      46.990  44.340  13.130  1.00  0.00           H
ATOM   1702  CG  ASP A 405      49.080  44.990  13.200  1.00  0.00           C
ATOM   1703  OD1 ASP A 405      50.270  44.580  13.270  1.00  0.00           O
ATOM   1704  OD2 ASP A 405      48.800  46.220  13.130  1.00  0.00           O
ATOM   1705  C   ASP A 405      49.290  42.700  11.190  1.00  0.00           C
ATOM   1706  O   ASP A 405      50.120  43.300  10.470  1.00  0.00           O
ATOM   1707  N   ILE A 406      49.370  41.390  11.400  1.00  0.00           N
ATOM   1708  H   ILE A 406      48.640  40.920  11.910  1.00  0.00           H
ATOM   1709  CA  ILE A 406      50.420  40.600  10.810  1.00  0.00           C
ATOM   1710  HA  ILE A 406      51.300  41.030  11.280  1.00  0.00           H
ATOM   1711  CB  ILE A 406      50.290  39.120  11.220  1.00  0.00           C
ATOM   1712  HB  ILE A 406      49.380  38.740  10.750  1.00  0.00           H
ATOM   1713  CG2 ILE A 406      51.540  38.370  10.790  1.00  0.00           C
ATOM   1714 1HG2 ILE A 406      51.630  38.360   9.700  1.00  0.00           H
ATOM   1715 2HG2 ILE A 406      52.470  38.730  11.230  1.00  0.00           H
ATOM   1716 3HG2 ILE A 406      51.440  37.340  11.160  1.00  0.00           H
ATOM   1717  CG1 ILE A 406      50.130  39.060  12.790  1.00  0.00           C
ATOM   1718 1HG1 ILE A 406      49.350  39.750  13.120  1.00  0.00           H
ATOM   1719 2HG1 ILE A 406      51.100  39.350  13.190  1.00  0.00           H
ATOM   1720  CD  ILE A 406      49.740  37.640  13.320  1.00  0.00           C
ATOM   1721  HD1 ILE A 406      48.970  37.290  12.630  1.00  0.00           H
ATOM   1722  HD2 ILE A 406      50.570  36.950  13.170  1.00  0.00           H
ATOM   1723  HD3 ILE A 406      49.420  37.690  14.360  1.00  0.00           H
ATOM   1724  C   ILE A 406      50.500  40.640   9.250  1.00  0.00           C
ATOM   1725  O   ILE A 406      51.540  40.910   8.670  1.00  0.00           O
ATOM   1726  N   VAL A 407      49.370  40.490   8.550  1.00  0.00           N
ATOM   1727  H   VAL A 407      48.540  40.130   9.000  1.00  0.00           H
ATOM   1728  CA  VAL A 407      49.390  40.340   7.100  1.00  0.00           C
ATOM   1729  HA  VAL A 407      50.320  39.810   6.910  1.00  0.00           H
ATOM   1730  CB  VAL A 407      48.330  39.430   6.590  1.00  0.00           C
ATOM   1731  HB  VAL A 407      48.260  39.490   5.500  1.00  0.00           H
ATOM   1732  CG1 VAL A 407      48.630  37.950   6.890  1.00  0.00           C
ATOM   1733 1HG1 VAL A 407      48.770  37.830   7.970  1.00  0.00           H
ATOM   1734 2HG1 VAL A 407      47.760  37.350   6.620  1.00  0.00           H
ATOM   1735 3HG1 VAL A 407      49.590  37.610   6.500  1.00  0.00           H
ATOM   1736  CG2 VAL A 407      46.860  39.830   7.050  1.00  0.00           C
ATOM   1737 1HG2 VAL A 407      46.210  39.190   6.450  1.00  0.00           H
ATOM   1738 2HG2 VAL A 407      46.710  39.520   8.090  1.00  0.00           H
ATOM   1739 3HG2 VAL A 407      46.670  40.890   6.880  1.00  0.00           H
ATOM   1740  C   VAL A 407      49.370  41.720   6.380  1.00  0.00           C
ATOM   1741  O   VAL A 407      49.730  41.810   5.240  1.00  0.00           O
ATOM   1742  N   THR A 408      49.100  42.740   7.170  1.00  0.00           N
ATOM   1743  H   THR A 408      48.650  42.580   8.060  1.00  0.00           H
ATOM   1744  CA  THR A 408      49.390  44.110   6.750  1.00  0.00           C
ATOM   1745  HA  THR A 408      49.240  44.100   5.670  1.00  0.00           H
ATOM   1746  CB  THR A 408      48.280  45.060   7.210  1.00  0.00           C
ATOM   1747  HB  THR A 408      48.660  46.070   7.010  1.00  0.00           H
ATOM   1748  CG2 THR A 408      47.040  44.750   6.360  1.00  0.00           C
ATOM   1749 1HG2 THR A 408      47.140  45.270   5.400  1.00  0.00           H
ATOM   1750 2HG2 THR A 408      46.940  43.670   6.320  1.00  0.00           H
ATOM   1751 3HG2 THR A 408      46.200  45.090   6.960  1.00  0.00           H
ATOM   1752  OG1 THR A 408      47.900  45.030   8.580  1.00  0.00           O
ATOM   1753  HG1 THR A 408      47.440  44.190   8.690  1.00  0.00           H
ATOM   1754  C   THR A 408      50.750  44.670   7.020  1.00  0.00           C
ATOM   1755  O   THR A 408      51.000  45.800   6.570  1.00  0.00           O
ATOM   1756  N   HIS A 409      51.630  43.790   7.610  1.00  0.00           N
ATOM   1757  H   HIS A 409      51.290  42.860   7.820  1.00  0.00           H
ATOM   1758  CA  HIS A 409      53.040  44.060   7.720  1.00  0.00           C
ATOM   1759  HA  HIS A 409      53.300  44.860   7.030  1.00  0.00           H
ATOM   1760  CB  HIS A 409      53.320  44.360   9.240  1.00  0.00           C
ATOM   1761  HB1 HIS A 409      54.390  44.490   9.410  1.00  0.00           H
ATOM   1762  HB2 HIS A 409      53.120  43.460   9.830  1.00  0.00           H
ATOM   1763  CG  HIS A 409      52.670  45.600   9.850  1.00  0.00           C
ATOM   1764  ND1 HIS A 409      51.730  45.700  10.850  1.00  0.00           N
ATOM   1765  HD1 HIS A 409      51.400  44.960  11.450  1.00  0.00           H
ATOM   1766  CE1 HIS A 409      51.230  46.960  10.860  1.00  0.00           C
ATOM   1767  HE1 HIS A 409      50.420  47.230  11.520  1.00  0.00           H
ATOM   1768  NE2 HIS A 409      51.950  47.750  10.020  1.00  0.00           N
ATOM   1769  CD2 HIS A 409      52.830  46.900   9.400  1.00  0.00           C
ATOM   1770  HD2 HIS A 409      53.550  47.170   8.650  1.00  0.00           H
ATOM   1771  C   HIS A 409      53.950  42.890   7.150  1.00  0.00           C
ATOM   1772  O   HIS A 409      55.150  42.960   7.080  1.00  0.00           O
ATOM   1773  N   THR A 410      53.380  41.720   6.870  1.00  0.00           N
ATOM   1774  H   THR A 410      52.380  41.680   6.990  1.00  0.00           H
ATOM   1775  CA  THR A 410      54.130  40.490   6.480  1.00  0.00           C
ATOM   1776  HA  THR A 410      55.190  40.700   6.350  1.00  0.00           H
ATOM   1777  CB  THR A 410      54.250  39.440   7.580  1.00  0.00           C
ATOM   1778  HB  THR A 410      54.970  38.720   7.180  1.00  0.00           H
ATOM   1779  CG2 THR A 410      54.710  39.990   8.930  1.00  0.00           C
ATOM   1780 1HG2 THR A 410      55.140  39.200   9.530  1.00  0.00           H
ATOM   1781 2HG2 THR A 410      55.540  40.680   8.780  1.00  0.00           H
ATOM   1782 3HG2 THR A 410      53.910  40.550   9.430  1.00  0.00           H
ATOM   1783  OG1 THR A 410      53.040  38.740   7.780  1.00  0.00           O
ATOM   1784  HG1 THR A 410      52.490  39.430   8.170  1.00  0.00           H
ATOM   1785  C   THR A 410      53.590  39.770   5.260  1.00  0.00           C
ATOM   1786  O   THR A 410      52.490  39.980   4.870  1.00  0.00           O
ATOM   1787  N   ARG A 411      54.450  38.880   4.700  1.00  0.00           N
ATOM   1788  H   ARG A 411      55.390  38.900   5.060  1.00  0.00           H
ATOM   1789  CA  ARG A 411      54.130  37.740   3.800  1.00  0.00           C
ATOM   1790  HA  ARG A 411      53.090  37.870   3.490  1.00  0.00           H
ATOM   1791  CB  ARG A 411      55.020  37.740   2.590  1.00  0.00           C
ATOM   1792  HB1 ARG A 411      54.800  36.820   2.050  1.00  0.00           H
ATOM   1793  HB2 ARG A 411      55.990  37.660   3.080  1.00  0.00           H
ATOM   1794  CG  ARG A 411      55.040  38.910   1.660  1.00  0.00           C
ATOM   1795  HG1 ARG A 411      55.700  38.570   0.860  1.00  0.00           H
ATOM   1796  HG2 ARG A 411      55.380  39.840   2.130  1.00  0.00           H
ATOM   1797  CD  ARG A 411      53.690  39.270   1.060  1.00  0.00           C
ATOM   1798  HD1 ARG A 411      53.770  40.290   0.680  1.00  0.00           H
ATOM   1799  HD2 ARG A 411      52.980  39.350   1.880  1.00  0.00           H
ATOM   1800  NE  ARG A 411      53.170  38.310   0.000  1.00  0.00           N
ATOM   1801  HE  ARG A 411      53.870  37.920  -0.620  1.00  0.00           H
ATOM   1802  CZ  ARG A 411      51.960  38.030  -0.350  1.00  0.00           C
ATOM   1803  NH1 ARG A 411      50.960  38.620   0.190  1.00  0.00           N
ATOM   1804 1HH1 ARG A 411      51.080  39.110   1.060  1.00  0.00           H
ATOM   1805 2HH1 ARG A 411      50.030  38.280   0.000  1.00  0.00           H
ATOM   1806  NH2 ARG A 411      51.770  37.180  -1.320  1.00  0.00           N
ATOM   1807 1HH2 ARG A 411      52.540  36.710  -1.780  1.00  0.00           H
ATOM   1808 2HH2 ARG A 411      50.810  36.900  -1.460  1.00  0.00           H
ATOM   1809  C   ARG A 411      54.260  36.430   4.660  1.00  0.00           C
ATOM   1810  O   ARG A 411      55.050  36.390   5.630  1.00  0.00           O
ATOM   1811  N   MET A 412      53.390  35.450   4.400  1.00  0.00           N
ATOM   1812  H   MET A 412      52.680  35.670   3.730  1.00  0.00           H
ATOM   1813  CA  MET A 412      53.450  34.180   5.020  1.00  0.00           C
ATOM   1814  HA  MET A 412      54.110  34.240   5.880  1.00  0.00           H
ATOM   1815  CB  MET A 412      52.040  33.770   5.510  1.00  0.00           C
ATOM   1816  HB1 MET A 412      51.930  32.760   5.890  1.00  0.00           H
ATOM   1817  HB2 MET A 412      51.430  33.870   4.610  1.00  0.00           H
ATOM   1818  CG  MET A 412      51.410  34.720   6.550  1.00  0.00           C
ATOM   1819  HG1 MET A 412      51.460  35.750   6.180  1.00  0.00           H
ATOM   1820  HG2 MET A 412      51.870  34.640   7.540  1.00  0.00           H
ATOM   1821  SD  MET A 412      49.690  34.410   6.950  1.00  0.00           S
ATOM   1822  CE  MET A 412      49.780  33.130   8.300  1.00  0.00           C
ATOM   1823  HE1 MET A 412      50.580  33.420   8.980  1.00  0.00           H
ATOM   1824  HE2 MET A 412      48.830  33.080   8.820  1.00  0.00           H
ATOM   1825  HE3 MET A 412      49.930  32.170   7.800  1.00  0.00           H
ATOM   1826  C   MET A 412      54.170  33.090   4.190  1.00  0.00           C
ATOM   1827  O   MET A 412      54.190  33.230   2.980  1.00  0.00           O
ATOM   1828  N   ASN A 413      54.470  31.980   4.830  1.00  0.00           N
ATOM   1829  H   ASN A 413      54.420  31.990   5.840  1.00  0.00           H
ATOM   1830  CA  ASN A 413      54.670  30.680   4.230  1.00  0.00           C
ATOM   1831  HA  ASN A 413      55.160  30.820   3.260  1.00  0.00           H
ATOM   1832  CB  ASN A 413      55.690  29.820   5.060  1.00  0.00           C
ATOM   1833  HB1 ASN A 413      55.150  29.360   5.880  1.00  0.00           H
ATOM   1834  HB2 ASN A 413      56.440  30.390   5.620  1.00  0.00           H
ATOM   1835  CG  ASN A 413      56.370  28.740   4.270  1.00  0.00           C
ATOM   1836  OD1 ASN A 413      56.030  27.610   4.420  1.00  0.00           O
ATOM   1837  ND2 ASN A 413      57.290  29.150   3.390  1.00  0.00           N
ATOM   1838 1HD2 ASN A 413      57.510  30.140   3.310  1.00  0.00           H
ATOM   1839 2HD2 ASN A 413      57.660  28.450   2.760  1.00  0.00           H
ATOM   1840  C   ASN A 413      53.260  29.940   4.090  1.00  0.00           C
ATOM   1841  O   ASN A 413      52.450  29.930   5.020  1.00  0.00           O
ATOM   1842  N   GLU A 414      53.050  29.250   2.950  1.00  0.00           N
ATOM   1843  H   GLU A 414      53.710  29.260   2.180  1.00  0.00           H
ATOM   1844  CA  GLU A 414      51.950  28.300   2.880  1.00  0.00           C
ATOM   1845  HA  GLU A 414      51.020  28.870   2.840  1.00  0.00           H
ATOM   1846  CB  GLU A 414      52.170  27.430   1.650  1.00  0.00           C
ATOM   1847  HB1 GLU A 414      51.510  26.560   1.640  1.00  0.00           H
ATOM   1848  HB2 GLU A 414      53.220  27.170   1.560  1.00  0.00           H
ATOM   1849  CG  GLU A 414      51.690  28.270   0.490  1.00  0.00           C
ATOM   1850  HG1 GLU A 414      52.370  29.120   0.440  1.00  0.00           H
ATOM   1851  HG2 GLU A 414      50.690  28.640   0.720  1.00  0.00           H
ATOM   1852  CD  GLU A 414      51.450  27.550  -0.910  1.00  0.00           C
ATOM   1853  OE1 GLU A 414      50.810  26.510  -0.920  1.00  0.00           O
ATOM   1854  OE2 GLU A 414      51.830  28.220  -1.930  1.00  0.00           O
ATOM   1855  C   GLU A 414      51.910  27.400   4.140  1.00  0.00           C
ATOM   1856  O   GLU A 414      50.770  27.100   4.540  1.00  0.00           O
ATOM   1857  N   GLU A 415      52.950  26.950   4.900  1.00  0.00           N
ATOM   1858  H   GLU A 415      53.900  27.020   4.560  1.00  0.00           H
ATOM   1859  CA  GLU A 415      52.890  26.280   6.200  1.00  0.00           C
ATOM   1860  HA  GLU A 415      52.430  25.300   6.070  1.00  0.00           H
ATOM   1861  CB  GLU A 415      54.340  26.140   6.700  1.00  0.00           C
ATOM   1862  HB1 GLU A 415      54.700  27.150   6.850  1.00  0.00           H
ATOM   1863  HB2 GLU A 415      54.960  25.640   5.950  1.00  0.00           H
ATOM   1864  CG  GLU A 415      54.560  25.470   8.070  1.00  0.00           C
ATOM   1865  HG1 GLU A 415      54.080  24.500   7.990  1.00  0.00           H
ATOM   1866  HG2 GLU A 415      54.020  26.090   8.780  1.00  0.00           H
ATOM   1867  CD  GLU A 415      55.970  25.060   8.460  1.00  0.00           C
ATOM   1868  OE1 GLU A 415      56.850  24.890   7.570  1.00  0.00           O
ATOM   1869  OE2 GLU A 415      56.150  24.870   9.690  1.00  0.00           O
ATOM   1870  C   GLU A 415      52.080  27.040   7.300  1.00  0.00           C
ATOM   1871  O   GLU A 415      51.310  26.480   8.020  1.00  0.00           O
ATOM   1872  N   GLN A 416      52.330  28.340   7.460  1.00  0.00           N
ATOM   1873  H   GLN A 416      52.950  28.850   6.850  1.00  0.00           H
ATOM   1874  CA  GLN A 416      51.560  29.260   8.370  1.00  0.00           C
ATOM   1875  HA  GLN A 416      51.370  28.830   9.350  1.00  0.00           H
ATOM   1876  CB  GLN A 416      52.340  30.540   8.550  1.00  0.00           C
ATOM   1877  HB1 GLN A 416      51.810  31.280   9.150  1.00  0.00           H
ATOM   1878  HB2 GLN A 416      52.410  31.040   7.580  1.00  0.00           H
ATOM   1879  CG  GLN A 416      53.770  30.450   9.140  1.00  0.00           C
ATOM   1880  HG1 GLN A 416      54.440  29.690   8.750  1.00  0.00           H
ATOM   1881  HG2 GLN A 416      53.760  30.020  10.140  1.00  0.00           H
ATOM   1882  CD  GLN A 416      54.520  31.760   8.890  1.00  0.00           C
ATOM   1883  OE1 GLN A 416      54.330  32.470   7.990  1.00  0.00           O
ATOM   1884  NE2 GLN A 416      55.480  32.010   9.680  1.00  0.00           N
ATOM   1885 1HE2 GLN A 416      55.710  31.460  10.500  1.00  0.00           H
ATOM   1886 2HE2 GLN A 416      56.020  32.810   9.370  1.00  0.00           H
ATOM   1887  C   GLN A 416      50.110  29.490   7.850  1.00  0.00           C
ATOM   1888  O   GLN A 416      49.100  29.480   8.660  1.00  0.00           O
ATOM   1889  N   ILE A 417      49.890  29.550   6.520  1.00  0.00           N
ATOM   1890  H   ILE A 417      50.670  29.460   5.880  1.00  0.00           H
ATOM   1891  CA  ILE A 417      48.550  29.730   5.900  1.00  0.00           C
ATOM   1892  HA  ILE A 417      48.090  30.530   6.480  1.00  0.00           H
ATOM   1893  CB  ILE A 417      48.630  30.000   4.440  1.00  0.00           C
ATOM   1894  HB  ILE A 417      49.220  29.230   3.940  1.00  0.00           H
ATOM   1895  CG2 ILE A 417      47.230  30.100   3.750  1.00  0.00           C
ATOM   1896 1HG2 ILE A 417      47.320  30.450   2.720  1.00  0.00           H
ATOM   1897 2HG2 ILE A 417      46.740  29.130   3.710  1.00  0.00           H
ATOM   1898 3HG2 ILE A 417      46.500  30.780   4.200  1.00  0.00           H
ATOM   1899  CG1 ILE A 417      49.370  31.400   4.340  1.00  0.00           C
ATOM   1900 1HG1 ILE A 417      50.280  31.340   4.940  1.00  0.00           H
ATOM   1901 2HG1 ILE A 417      48.740  32.190   4.750  1.00  0.00           H
ATOM   1902  CD  ILE A 417      49.650  31.860   2.900  1.00  0.00           C
ATOM   1903  HD1 ILE A 417      48.730  31.930   2.320  1.00  0.00           H
ATOM   1904  HD2 ILE A 417      50.140  32.830   2.970  1.00  0.00           H
ATOM   1905  HD3 ILE A 417      50.290  31.160   2.370  1.00  0.00           H
ATOM   1906  C   ILE A 417      47.700  28.490   6.120  1.00  0.00           C
ATOM   1907  O   ILE A 417      46.510  28.620   6.450  1.00  0.00           O
ATOM   1908  N   ALA A 418      48.280  27.310   6.120  1.00  0.00           N
ATOM   1909  H   ALA A 418      49.240  27.200   5.820  1.00  0.00           H
ATOM   1910  CA  ALA A 418      47.610  26.040   6.360  1.00  0.00           C
ATOM   1911  HA  ALA A 418      46.600  26.120   5.960  1.00  0.00           H
ATOM   1912  CB  ALA A 418      48.430  24.970   5.610  1.00  0.00           C
ATOM   1913  HB1 ALA A 418      49.130  24.480   6.280  1.00  0.00           H
ATOM   1914  HB2 ALA A 418      47.680  24.290   5.210  1.00  0.00           H
ATOM   1915  HB3 ALA A 418      48.870  25.360   4.690  1.00  0.00           H
ATOM   1916  C   ALA A 418      47.400  25.810   7.810  1.00  0.00           C
ATOM   1917  O   ALA A 418      46.340  25.420   8.190  1.00  0.00           O
ATOM   1918  N   ALA A 419      48.340  26.290   8.650  1.00  0.00           N
ATOM   1919  H   ALA A 419      49.230  26.600   8.300  1.00  0.00           H
ATOM   1920  CA  ALA A 419      48.090  26.360  10.080  1.00  0.00           C
ATOM   1921  HA  ALA A 419      47.700  25.360  10.260  1.00  0.00           H
ATOM   1922  CB  ALA A 419      49.460  26.590  10.770  1.00  0.00           C
ATOM   1923  HB1 ALA A 419      49.300  26.460  11.840  1.00  0.00           H
ATOM   1924  HB2 ALA A 419      50.300  25.980  10.470  1.00  0.00           H
ATOM   1925  HB3 ALA A 419      49.690  27.650  10.660  1.00  0.00           H
ATOM   1926  C   ALA A 419      46.950  27.300  10.460  1.00  0.00           C
ATOM   1927  O   ALA A 419      46.160  26.960  11.370  1.00  0.00           O
ATOM   1928  N   VAL A 420      46.800  28.530   9.820  1.00  0.00           N
ATOM   1929  H   VAL A 420      47.530  28.900   9.220  1.00  0.00           H
ATOM   1930  CA  VAL A 420      45.630  29.380  10.150  1.00  0.00           C
ATOM   1931  HA  VAL A 420      45.650  29.620  11.220  1.00  0.00           H
ATOM   1932  CB  VAL A 420      45.830  30.750   9.550  1.00  0.00           C
ATOM   1933  HB  VAL A 420      46.170  30.600   8.520  1.00  0.00           H
ATOM   1934  CG1 VAL A 420      44.560  31.590   9.500  1.00  0.00           C
ATOM   1935 1HG1 VAL A 420      44.800  32.660   9.510  1.00  0.00           H
ATOM   1936 2HG1 VAL A 420      44.070  31.380   8.550  1.00  0.00           H
ATOM   1937 3HG1 VAL A 420      43.860  31.500  10.330  1.00  0.00           H
ATOM   1938  CG2 VAL A 420      46.800  31.630  10.300  1.00  0.00           C
ATOM   1939 1HG2 VAL A 420      46.310  31.720  11.270  1.00  0.00           H
ATOM   1940 2HG2 VAL A 420      47.780  31.150  10.320  1.00  0.00           H
ATOM   1941 3HG2 VAL A 420      46.940  32.640   9.930  1.00  0.00           H
ATOM   1942  C   VAL A 420      44.310  28.700   9.730  1.00  0.00           C
ATOM   1943  O   VAL A 420      43.360  28.810  10.500  1.00  0.00           O
ATOM   1944  N   CYS A 421      44.270  27.920   8.630  1.00  0.00           N
ATOM   1945  H   CYS A 421      45.150  27.690   8.170  1.00  0.00           H
ATOM   1946  CA  CYS A 421      43.060  27.160   8.160  1.00  0.00           C
ATOM   1947  HA  CYS A 421      42.250  27.860   8.370  1.00  0.00           H
ATOM   1948  CB  CYS A 421      43.190  26.900   6.620  1.00  0.00           C
ATOM   1949  HB1 CYS A 421      42.240  26.420   6.360  1.00  0.00           H
ATOM   1950  HB2 CYS A 421      44.110  26.370   6.370  1.00  0.00           H
ATOM   1951  SG  CYS A 421      43.380  28.490   5.780  1.00  0.00           S
ATOM   1952  HG  CYS A 421      44.650  28.760   6.070  1.00  0.00           H
ATOM   1953  C   CYS A 421      42.710  25.910   9.020  1.00  0.00           C
ATOM   1954  O   CYS A 421      41.600  25.620   9.350  1.00  0.00           O
ATOM   1955  N   LEU A 422      43.750  25.150   9.430  1.00  0.00           N
ATOM   1956  H   LEU A 422      44.690  25.450   9.220  1.00  0.00           H
ATOM   1957  CA  LEU A 422      43.650  23.840  10.140  1.00  0.00           C
ATOM   1958  HA  LEU A 422      42.850  23.240   9.700  1.00  0.00           H
ATOM   1959  CB  LEU A 422      44.940  23.050  10.040  1.00  0.00           C
ATOM   1960  HB1 LEU A 422      45.760  23.690  10.360  1.00  0.00           H
ATOM   1961  HB2 LEU A 422      45.130  22.730   9.010  1.00  0.00           H
ATOM   1962  CG  LEU A 422      44.860  21.680  10.840  1.00  0.00           C
ATOM   1963  HG  LEU A 422      44.640  21.940  11.880  1.00  0.00           H
ATOM   1964  CD1 LEU A 422      43.750  20.700  10.320  1.00  0.00           C
ATOM   1965 1HD1 LEU A 422      42.780  21.190  10.410  1.00  0.00           H
ATOM   1966 2HD1 LEU A 422      43.880  20.320   9.310  1.00  0.00           H
ATOM   1967 3HD1 LEU A 422      43.700  19.880  11.040  1.00  0.00           H
ATOM   1968  CD2 LEU A 422      46.190  21.040  10.840  1.00  0.00           C
ATOM   1969 1HD2 LEU A 422      46.570  21.110   9.820  1.00  0.00           H
ATOM   1970 2HD2 LEU A 422      46.910  21.680  11.350  1.00  0.00           H
ATOM   1971 3HD2 LEU A 422      46.160  20.010  11.200  1.00  0.00           H
ATOM   1972  C   LEU A 422      43.220  24.170  11.570  1.00  0.00           C
ATOM   1973  O   LEU A 422      42.480  23.400  12.190  1.00  0.00           O
ATOM   1974  N   ALA A 423      43.710  25.320  12.130  1.00  0.00           N
ATOM   1975  H   ALA A 423      44.330  25.840  11.530  1.00  0.00           H
ATOM   1976  CA  ALA A 423      43.320  25.820  13.500  1.00  0.00           C
ATOM   1977  HA  ALA A 423      43.370  25.020  14.230  1.00  0.00           H
ATOM   1978  CB  ALA A 423      44.280  26.910  13.840  1.00  0.00           C
ATOM   1979  HB1 ALA A 423      44.020  27.230  14.850  1.00  0.00           H
ATOM   1980  HB2 ALA A 423      45.290  26.520  13.840  1.00  0.00           H
ATOM   1981  HB3 ALA A 423      44.260  27.740  13.140  1.00  0.00           H
ATOM   1982  C   ALA A 423      41.860  26.270  13.490  1.00  0.00           C
ATOM   1983  O   ALA A 423      41.080  25.770  14.260  1.00  0.00           O
ATOM   1984  N   VAL A 424      41.440  27.170  12.560  1.00  0.00           N
ATOM   1985  H   VAL A 424      42.150  27.750  12.150  1.00  0.00           H
ATOM   1986  CA  VAL A 424      40.030  27.600  12.460  1.00  0.00           C
ATOM   1987  HA  VAL A 424      39.680  27.960  13.430  1.00  0.00           H
ATOM   1988  CB  VAL A 424      40.000  28.760  11.490  1.00  0.00           C
ATOM   1989  HB  VAL A 424      40.300  28.320  10.540  1.00  0.00           H
ATOM   1990  CG1 VAL A 424      38.520  29.400  11.410  1.00  0.00           C
ATOM   1991 1HG1 VAL A 424      38.450  30.330  10.840  1.00  0.00           H
ATOM   1992 2HG1 VAL A 424      37.800  28.680  11.020  1.00  0.00           H
ATOM   1993 3HG1 VAL A 424      38.220  29.490  12.450  1.00  0.00           H
ATOM   1994  CG2 VAL A 424      40.830  29.950  11.920  1.00  0.00           C
ATOM   1995 1HG2 VAL A 424      40.340  30.280  12.830  1.00  0.00           H
ATOM   1996 2HG2 VAL A 424      41.870  29.780  12.210  1.00  0.00           H
ATOM   1997 3HG2 VAL A 424      40.740  30.770  11.210  1.00  0.00           H
ATOM   1998  C   VAL A 424      39.080  26.440  12.000  1.00  0.00           C
ATOM   1999  O   VAL A 424      37.920  26.390  12.410  1.00  0.00           O
ATOM   2000  N   LEU A 425      39.480  25.440  11.180  1.00  0.00           N
ATOM   2001  H   LEU A 425      40.410  25.480  10.780  1.00  0.00           H
ATOM   2002  CA  LEU A 425      38.590  24.320  10.860  1.00  0.00           C
ATOM   2003  HA  LEU A 425      37.560  24.600  10.650  1.00  0.00           H
ATOM   2004  CB  LEU A 425      39.250  23.560   9.710  1.00  0.00           C
ATOM   2005  HB1 LEU A 425      38.830  22.550   9.630  1.00  0.00           H
ATOM   2006  HB2 LEU A 425      40.310  23.500   9.950  1.00  0.00           H
ATOM   2007  CG  LEU A 425      38.980  24.260   8.330  1.00  0.00           C
ATOM   2008  HG  LEU A 425      39.240  25.320   8.380  1.00  0.00           H
ATOM   2009  CD1 LEU A 425      39.740  23.570   7.190  1.00  0.00           C
ATOM   2010 1HD1 LEU A 425      39.430  24.070   6.270  1.00  0.00           H
ATOM   2011 2HD1 LEU A 425      40.790  23.760   7.430  1.00  0.00           H
ATOM   2012 3HD1 LEU A 425      39.690  22.480   7.080  1.00  0.00           H
ATOM   2013  CD2 LEU A 425      37.460  24.260   8.000  1.00  0.00           C
ATOM   2014 1HD2 LEU A 425      37.330  24.640   6.980  1.00  0.00           H
ATOM   2015 2HD2 LEU A 425      36.970  23.290   8.060  1.00  0.00           H
ATOM   2016 3HD2 LEU A 425      36.910  24.840   8.730  1.00  0.00           H
ATOM   2017  C   LEU A 425      38.370  23.350  11.990  1.00  0.00           C
ATOM   2018  O   LEU A 425      37.320  22.710  12.030  1.00  0.00           O
ATOM   2019  N   GLN A 426      39.310  23.210  12.860  1.00  0.00           N
ATOM   2020  H   GLN A 426      40.130  23.800  12.810  1.00  0.00           H
ATOM   2021  CA  GLN A 426      38.980  22.430  14.050  1.00  0.00           C
ATOM   2022  HA  GLN A 426      38.450  21.540  13.710  1.00  0.00           H
ATOM   2023  CB  GLN A 426      40.250  22.110  14.850  1.00  0.00           C
ATOM   2024  HB1 GLN A 426      40.060  21.870  15.900  1.00  0.00           H
ATOM   2025  HB2 GLN A 426      40.820  23.040  14.840  1.00  0.00           H
ATOM   2026  CG  GLN A 426      41.130  20.980  14.180  1.00  0.00           C
ATOM   2027  HG1 GLN A 426      41.250  21.430  13.200  1.00  0.00           H
ATOM   2028  HG2 GLN A 426      40.690  19.990  14.050  1.00  0.00           H
ATOM   2029  CD  GLN A 426      42.480  20.860  14.800  1.00  0.00           C
ATOM   2030  OE1 GLN A 426      42.740  20.120  15.730  1.00  0.00           O
ATOM   2031  NE2 GLN A 426      43.540  21.540  14.330  1.00  0.00           N
ATOM   2032 1HE2 GLN A 426      43.380  22.180  13.560  1.00  0.00           H
ATOM   2033 2HE2 GLN A 426      44.500  21.330  14.540  1.00  0.00           H
ATOM   2034  C   GLN A 426      37.900  23.120  14.940  1.00  0.00           C
ATOM   2035  O   GLN A 426      37.050  22.450  15.510  1.00  0.00           O
ATOM   2036  N   ALA A 427      37.940  24.490  14.980  1.00  0.00           N
ATOM   2037  H   ALA A 427      38.720  24.870  14.470  1.00  0.00           H
ATOM   2038  CA  ALA A 427      36.780  25.220  15.630  1.00  0.00           C
ATOM   2039  HA  ALA A 427      36.660  24.850  16.650  1.00  0.00           H
ATOM   2040  CB  ALA A 427      37.260  26.770  15.730  1.00  0.00           C
ATOM   2041  HB1 ALA A 427      38.340  26.870  15.860  1.00  0.00           H
ATOM   2042  HB2 ALA A 427      37.050  27.300  14.800  1.00  0.00           H
ATOM   2043  HB3 ALA A 427      36.760  27.280  16.550  1.00  0.00           H
ATOM   2044  C   ALA A 427      35.390  25.040  14.950  1.00  0.00           C
ATOM   2045  O   ALA A 427      34.410  24.670  15.590  1.00  0.00           O
ATOM   2046  N   LEU A 428      35.290  25.170  13.600  1.00  0.00           N
ATOM   2047  H   LEU A 428      36.070  25.520  13.070  1.00  0.00           H
ATOM   2048  CA  LEU A 428      34.000  25.150  12.940  1.00  0.00           C
ATOM   2049  HA  LEU A 428      33.200  25.690  13.440  1.00  0.00           H
ATOM   2050  CB  LEU A 428      34.150  25.600  11.560  1.00  0.00           C
ATOM   2051  HB1 LEU A 428      33.210  25.410  11.050  1.00  0.00           H
ATOM   2052  HB2 LEU A 428      34.920  24.960  11.140  1.00  0.00           H
ATOM   2053  CG  LEU A 428      34.450  27.080  11.360  1.00  0.00           C
ATOM   2054  HG  LEU A 428      35.400  27.340  11.810  1.00  0.00           H
ATOM   2055  CD1 LEU A 428      34.410  27.430   9.870  1.00  0.00           C
ATOM   2056 1HD1 LEU A 428      34.510  26.550   9.220  1.00  0.00           H
ATOM   2057 2HD1 LEU A 428      33.430  27.800   9.560  1.00  0.00           H
ATOM   2058 3HD1 LEU A 428      35.070  28.250   9.610  1.00  0.00           H
ATOM   2059  CD2 LEU A 428      33.430  27.980  11.970  1.00  0.00           C
ATOM   2060 1HD2 LEU A 428      33.790  29.000  11.820  1.00  0.00           H
ATOM   2061 2HD2 LEU A 428      32.390  27.890  11.670  1.00  0.00           H
ATOM   2062 3HD2 LEU A 428      33.390  27.880  13.060  1.00  0.00           H
ATOM   2063  C   LEU A 428      33.510  23.700  12.910  1.00  0.00           C
ATOM   2064  O   LEU A 428      32.300  23.420  13.070  1.00  0.00           O
ATOM   2065  N   SER A 429      34.370  22.710  12.930  1.00  0.00           N
ATOM   2066  H   SER A 429      35.340  22.940  12.760  1.00  0.00           H
ATOM   2067  CA  SER A 429      34.040  21.250  13.150  1.00  0.00           C
ATOM   2068  HA  SER A 429      33.400  20.990  12.310  1.00  0.00           H
ATOM   2069  CB  SER A 429      35.300  20.460  12.980  1.00  0.00           C
ATOM   2070  HB1 SER A 429      35.070  19.410  13.160  1.00  0.00           H
ATOM   2071  HB2 SER A 429      36.080  20.790  13.660  1.00  0.00           H
ATOM   2072  OG  SER A 429      35.810  20.570  11.640  1.00  0.00           O
ATOM   2073  HG  SER A 429      36.410  21.320  11.520  1.00  0.00           H
ATOM   2074  C   SER A 429      33.370  20.900  14.440  1.00  0.00           C
ATOM   2075  O   SER A 429      32.680  19.860  14.480  1.00  0.00           O
ATOM   2076  N   VAL A 430      33.550  21.760  15.470  1.00  0.00           N
ATOM   2077  H   VAL A 430      34.210  22.530  15.380  1.00  0.00           H
ATOM   2078  CA  VAL A 430      32.700  21.610  16.690  1.00  0.00           C
ATOM   2079  HA  VAL A 430      32.170  20.660  16.750  1.00  0.00           H
ATOM   2080  CB  VAL A 430      33.630  21.690  17.860  1.00  0.00           C
ATOM   2081  HB  VAL A 430      34.240  22.590  17.740  1.00  0.00           H
ATOM   2082  CG1 VAL A 430      32.860  21.780  19.140  1.00  0.00           C
ATOM   2083 1HG1 VAL A 430      31.990  21.130  19.180  1.00  0.00           H
ATOM   2084 2HG1 VAL A 430      33.480  21.650  20.030  1.00  0.00           H
ATOM   2085 3HG1 VAL A 430      32.460  22.790  19.240  1.00  0.00           H
ATOM   2086  CG2 VAL A 430      34.680  20.540  17.960  1.00  0.00           C
ATOM   2087 1HG2 VAL A 430      35.110  20.520  18.960  1.00  0.00           H
ATOM   2088 2HG2 VAL A 430      34.190  19.580  17.800  1.00  0.00           H
ATOM   2089 3HG2 VAL A 430      35.440  20.650  17.190  1.00  0.00           H
ATOM   2090  C   VAL A 430      31.540  22.610  16.760  1.00  0.00           C
ATOM   2091  O   VAL A 430      30.420  22.250  17.180  1.00  0.00           O
ATOM   2092  N   LEU A 431      31.750  23.850  16.250  1.00  0.00           N
ATOM   2093  H   LEU A 431      32.610  24.110  15.800  1.00  0.00           H
ATOM   2094  CA  LEU A 431      30.760  24.910  16.420  1.00  0.00           C
ATOM   2095  HA  LEU A 431      30.290  24.880  17.400  1.00  0.00           H
ATOM   2096  CB  LEU A 431      31.260  26.300  15.960  1.00  0.00           C
ATOM   2097  HB1 LEU A 431      30.410  26.920  15.690  1.00  0.00           H
ATOM   2098  HB2 LEU A 431      31.790  26.110  15.030  1.00  0.00           H
ATOM   2099  CG  LEU A 431      32.250  26.880  16.950  1.00  0.00           C
ATOM   2100  HG  LEU A 431      33.010  26.200  17.340  1.00  0.00           H
ATOM   2101  CD1 LEU A 431      33.060  27.960  16.160  1.00  0.00           C
ATOM   2102 1HD1 LEU A 431      33.790  28.490  16.770  1.00  0.00           H
ATOM   2103 2HD1 LEU A 431      33.560  27.510  15.300  1.00  0.00           H
ATOM   2104 3HD1 LEU A 431      32.280  28.580  15.710  1.00  0.00           H
ATOM   2105  CD2 LEU A 431      31.560  27.440  18.170  1.00  0.00           C
ATOM   2106 1HD2 LEU A 431      31.060  28.350  17.840  1.00  0.00           H
ATOM   2107 2HD2 LEU A 431      30.880  26.690  18.560  1.00  0.00           H
ATOM   2108 3HD2 LEU A 431      32.330  27.700  18.900  1.00  0.00           H
ATOM   2109  C   LEU A 431      29.530  24.550  15.500  1.00  0.00           C
ATOM   2110  O   LEU A 431      28.420  24.570  15.990  1.00  0.00           O
ATOM   2111  N   HIS A 432      29.760  24.090  14.260  1.00  0.00           N
ATOM   2112  H   HIS A 432      30.710  24.090  13.910  1.00  0.00           H
ATOM   2113  CA  HIS A 432      28.760  23.640  13.350  1.00  0.00           C
ATOM   2114  HA  HIS A 432      27.880  24.270  13.270  1.00  0.00           H
ATOM   2115  CB  HIS A 432      29.230  23.570  11.870  1.00  0.00           C
ATOM   2116  HB1 HIS A 432      28.430  23.100  11.300  1.00  0.00           H
ATOM   2117  HB2 HIS A 432      30.050  22.860  11.860  1.00  0.00           H
ATOM   2118  CG  HIS A 432      29.580  24.810  11.170  1.00  0.00           C
ATOM   2119  ND1 HIS A 432      29.830  24.910   9.800  1.00  0.00           N
ATOM   2120  CE1 HIS A 432      30.110  26.190   9.600  1.00  0.00           C
ATOM   2121  HE1 HIS A 432      30.320  26.590   8.620  1.00  0.00           H
ATOM   2122  NE2 HIS A 432      29.800  26.920  10.660  1.00  0.00           N
ATOM   2123  HE2 HIS A 432      29.670  27.920  10.610  1.00  0.00           H
ATOM   2124  CD2 HIS A 432      29.480  26.070  11.680  1.00  0.00           C
ATOM   2125  HD2 HIS A 432      29.350  26.270  12.730  1.00  0.00           H
ATOM   2126  C   HIS A 432      28.280  22.250  13.740  1.00  0.00           C
ATOM   2127  O   HIS A 432      27.120  21.990  13.520  1.00  0.00           O
ATOM   2128  N   ALA A 433      29.040  21.460  14.510  1.00  0.00           N
ATOM   2129  H   ALA A 433      30.020  21.700  14.600  1.00  0.00           H
ATOM   2130  CA  ALA A 433      28.560  20.200  15.120  1.00  0.00           C
ATOM   2131  HA  ALA A 433      28.080  19.620  14.330  1.00  0.00           H
ATOM   2132  CB  ALA A 433      29.700  19.350  15.640  1.00  0.00           C
ATOM   2133  HB1 ALA A 433      30.220  19.850  16.470  1.00  0.00           H
ATOM   2134  HB2 ALA A 433      29.370  18.410  16.070  1.00  0.00           H
ATOM   2135  HB3 ALA A 433      30.400  19.220  14.810  1.00  0.00           H
ATOM   2136  C   ALA A 433      27.450  20.480  16.180  1.00  0.00           C
ATOM   2137  O   ALA A 433      26.600  19.610  16.380  1.00  0.00           O
ATOM   2138  N   GLN A 434      27.390  21.730  16.730  1.00  0.00           N
ATOM   2139  H   GLN A 434      28.180  22.330  16.530  1.00  0.00           H
ATOM   2140  CA  GLN A 434      26.460  22.240  17.720  1.00  0.00           C
ATOM   2141  HA  GLN A 434      25.790  21.470  18.090  1.00  0.00           H
ATOM   2142  CB  GLN A 434      27.330  22.710  18.970  1.00  0.00           C
ATOM   2143  HB1 GLN A 434      26.720  23.300  19.650  1.00  0.00           H
ATOM   2144  HB2 GLN A 434      28.100  23.430  18.710  1.00  0.00           H
ATOM   2145  CG  GLN A 434      27.960  21.590  19.780  1.00  0.00           C
ATOM   2146  HG1 GLN A 434      28.980  21.840  20.050  1.00  0.00           H
ATOM   2147  HG2 GLN A 434      28.050  20.640  19.250  1.00  0.00           H
ATOM   2148  CD  GLN A 434      27.360  21.280  21.070  1.00  0.00           C
ATOM   2149  OE1 GLN A 434      26.140  21.520  21.340  1.00  0.00           O
ATOM   2150  NE2 GLN A 434      27.980  20.580  22.010  1.00  0.00           N
ATOM   2151 1HE2 GLN A 434      28.890  20.180  21.840  1.00  0.00           H
ATOM   2152 2HE2 GLN A 434      27.500  20.460  22.890  1.00  0.00           H
ATOM   2153  C   GLN A 434      25.540  23.360  17.210  1.00  0.00           C
ATOM   2154  O   GLN A 434      24.890  24.000  18.070  1.00  0.00           O
ATOM   2155  N   GLY A 435      25.460  23.560  15.900  1.00  0.00           N
ATOM   2156  H   GLY A 435      26.030  22.990  15.300  1.00  0.00           H
ATOM   2157  CA  GLY A 435      24.640  24.510  15.150  1.00  0.00           C
ATOM   2158  HA1 GLY A 435      23.590  24.360  15.430  1.00  0.00           H
ATOM   2159  HA2 GLY A 435      24.790  24.160  14.130  1.00  0.00           H
ATOM   2160  C   GLY A 435      25.020  25.950  15.200  1.00  0.00           C
ATOM   2161  O   GLY A 435      24.130  26.790  14.890  1.00  0.00           O
ATOM   2162  N   VAL A 436      26.130  26.420  15.840  1.00  0.00           N
ATOM   2163  H   VAL A 436      26.880  25.840  16.200  1.00  0.00           H
ATOM   2164  CA  VAL A 436      26.540  27.840  15.900  1.00  0.00           C
ATOM   2165  HA  VAL A 436      25.740  28.560  16.070  1.00  0.00           H
ATOM   2166  CB  VAL A 436      27.570  28.090  17.020  1.00  0.00           C
ATOM   2167  HB  VAL A 436      28.560  27.750  16.690  1.00  0.00           H
ATOM   2168  CG1 VAL A 436      27.740  29.620  17.240  1.00  0.00           C
ATOM   2169 1HG1 VAL A 436      28.610  29.790  17.890  1.00  0.00           H
ATOM   2170 2HG1 VAL A 436      28.000  30.150  16.330  1.00  0.00           H
ATOM   2171 3HG1 VAL A 436      26.820  30.000  17.680  1.00  0.00           H
ATOM   2172  CG2 VAL A 436      27.270  27.290  18.330  1.00  0.00           C
ATOM   2173 1HG2 VAL A 436      27.160  26.240  18.060  1.00  0.00           H
ATOM   2174 2HG2 VAL A 436      28.130  27.330  19.000  1.00  0.00           H
ATOM   2175 3HG2 VAL A 436      26.370  27.740  18.740  1.00  0.00           H
ATOM   2176  C   VAL A 436      27.160  28.250  14.570  1.00  0.00           C
ATOM   2177  O   VAL A 436      27.860  27.520  13.910  1.00  0.00           O
ATOM   2178  N   ILE A 437      26.880  29.490  14.190  1.00  0.00           N
ATOM   2179  H   ILE A 437      26.290  30.060  14.780  1.00  0.00           H
ATOM   2180  CA  ILE A 437      27.250  30.130  12.880  1.00  0.00           C
ATOM   2181  HA  ILE A 437      27.990  29.580  12.300  1.00  0.00           H
ATOM   2182  CB  ILE A 437      26.020  30.190  11.960  1.00  0.00           C
ATOM   2183  HB  ILE A 437      25.470  31.000  12.440  1.00  0.00           H
ATOM   2184  CG2 ILE A 437      26.530  30.630  10.510  1.00  0.00           C
ATOM   2185 1HG2 ILE A 437      27.230  29.900  10.110  1.00  0.00           H
ATOM   2186 2HG2 ILE A 437      25.710  30.730   9.800  1.00  0.00           H
ATOM   2187 3HG2 ILE A 437      27.120  31.550  10.580  1.00  0.00           H
ATOM   2188  CG1 ILE A 437      25.070  28.940  11.900  1.00  0.00           C
ATOM   2189 1HG1 ILE A 437      24.890  28.580  12.910  1.00  0.00           H
ATOM   2190 2HG1 ILE A 437      25.500  28.180  11.250  1.00  0.00           H
ATOM   2191  CD  ILE A 437      23.760  29.290  11.220  1.00  0.00           C
ATOM   2192  HD1 ILE A 437      23.270  30.080  11.790  1.00  0.00           H
ATOM   2193  HD2 ILE A 437      23.920  29.640  10.200  1.00  0.00           H
ATOM   2194  HD3 ILE A 437      23.090  28.450  11.070  1.00  0.00           H
ATOM   2195  C   ILE A 437      27.830  31.510  13.160  1.00  0.00           C
ATOM   2196  O   ILE A 437      27.270  32.320  13.840  1.00  0.00           O
ATOM   2197  N   HIS A 438      28.930  31.940  12.550  1.00  0.00           N
ATOM   2198  H   HIS A 438      29.360  31.260  11.940  1.00  0.00           H
ATOM   2199  CA  HIS A 438      29.680  33.160  12.850  1.00  0.00           C
ATOM   2200  HA  HIS A 438      29.460  33.520  13.850  1.00  0.00           H
ATOM   2201  CB  HIS A 438      31.170  32.870  12.850  1.00  0.00           C
ATOM   2202  HB1 HIS A 438      31.510  32.500  11.880  1.00  0.00           H
ATOM   2203  HB2 HIS A 438      31.380  32.090  13.570  1.00  0.00           H
ATOM   2204  CG  HIS A 438      32.090  34.020  13.220  1.00  0.00           C
ATOM   2205  ND1 HIS A 438      32.710  35.000  12.350  1.00  0.00           N
ATOM   2206  CE1 HIS A 438      33.400  35.860  13.100  1.00  0.00           C
ATOM   2207  HE1 HIS A 438      34.030  36.690  12.820  1.00  0.00           H
ATOM   2208  NE2 HIS A 438      33.270  35.470  14.370  1.00  0.00           N
ATOM   2209  HE2 HIS A 438      33.620  35.960  15.180  1.00  0.00           H
ATOM   2210  CD2 HIS A 438      32.430  34.380  14.450  1.00  0.00           C
ATOM   2211  HD2 HIS A 438      32.090  33.870  15.330  1.00  0.00           H
ATOM   2212  C   HIS A 438      29.350  34.250  11.840  1.00  0.00           C
ATOM   2213  O   HIS A 438      29.410  35.420  12.190  1.00  0.00           O
ATOM   2214  N   ARG A 439      29.100  33.880  10.550  1.00  0.00           N
ATOM   2215  H   ARG A 439      29.350  32.920  10.350  1.00  0.00           H
ATOM   2216  CA  ARG A 439      28.770  34.800   9.500  1.00  0.00           C
ATOM   2217  HA  ARG A 439      28.680  34.180   8.600  1.00  0.00           H
ATOM   2218  CB  ARG A 439      27.430  35.510   9.860  1.00  0.00           C
ATOM   2219  HB1 ARG A 439      27.150  36.110   8.990  1.00  0.00           H
ATOM   2220  HB2 ARG A 439      27.540  36.120  10.760  1.00  0.00           H
ATOM   2221  CG  ARG A 439      26.340  34.530  10.240  1.00  0.00           C
ATOM   2222  HG1 ARG A 439      26.600  34.060  11.190  1.00  0.00           H
ATOM   2223  HG2 ARG A 439      26.340  33.770   9.470  1.00  0.00           H
ATOM   2224  CD  ARG A 439      24.950  35.120  10.240  1.00  0.00           C
ATOM   2225  HD1 ARG A 439      24.190  34.460   9.820  1.00  0.00           H
ATOM   2226  HD2 ARG A 439      24.890  35.810   9.400  1.00  0.00           H
ATOM   2227  NE  ARG A 439      24.530  35.740  11.540  1.00  0.00           N
ATOM   2228  HE  ARG A 439      25.290  35.990  12.160  1.00  0.00           H
ATOM   2229  CZ  ARG A 439      23.380  36.360  11.750  1.00  0.00           C
ATOM   2230  NH1 ARG A 439      23.210  37.050  12.850  1.00  0.00           N
ATOM   2231 1HH1 ARG A 439      23.970  37.050  13.510  1.00  0.00           H
ATOM   2232 2HH1 ARG A 439      22.280  37.440  12.910  1.00  0.00           H
ATOM   2233  NH2 ARG A 439      22.380  36.410  10.930  1.00  0.00           N
ATOM   2234 1HH2 ARG A 439      22.370  35.970  10.020  1.00  0.00           H
ATOM   2235 2HH2 ARG A 439      21.540  36.880  11.250  1.00  0.00           H
ATOM   2236  C   ARG A 439      29.850  35.830   9.070  1.00  0.00           C
ATOM   2237  O   ARG A 439      29.680  36.440   8.040  1.00  0.00           O
ATOM   2238  N   ASP A 440      30.860  36.050   9.900  1.00  0.00           N
ATOM   2239  H   ASP A 440      30.900  35.510  10.750  1.00  0.00           H
ATOM   2240  CA  ASP A 440      31.640  37.250   9.810  1.00  0.00           C
ATOM   2241  HA  ASP A 440      31.460  37.840   8.900  1.00  0.00           H
ATOM   2242  CB  ASP A 440      31.180  38.100  11.020  1.00  0.00           C
ATOM   2243  HB1 ASP A 440      31.500  37.760  12.000  1.00  0.00           H
ATOM   2244  HB2 ASP A 440      30.120  38.340  11.020  1.00  0.00           H
ATOM   2245  CG  ASP A 440      31.720  39.550  10.800  1.00  0.00           C
ATOM   2246  OD1 ASP A 440      31.380  40.180   9.780  1.00  0.00           O
ATOM   2247  OD2 ASP A 440      32.520  40.060  11.660  1.00  0.00           O
ATOM   2248  C   ASP A 440      33.190  37.090   9.860  1.00  0.00           C
ATOM   2249  O   ASP A 440      33.930  38.020  10.110  1.00  0.00           O
ATOM   2250  N   ILE A 441      33.600  35.920   9.430  1.00  0.00           N
ATOM   2251  H   ILE A 441      32.840  35.290   9.220  1.00  0.00           H
ATOM   2252  CA  ILE A 441      34.990  35.510   9.460  1.00  0.00           C
ATOM   2253  HA  ILE A 441      35.330  35.560  10.490  1.00  0.00           H
ATOM   2254  CB  ILE A 441      35.230  34.070   8.910  1.00  0.00           C
ATOM   2255  HB  ILE A 441      34.920  33.990   7.870  1.00  0.00           H
ATOM   2256  CG2 ILE A 441      36.700  33.730   8.900  1.00  0.00           C
ATOM   2257 1HG2 ILE A 441      36.970  32.800   8.380  1.00  0.00           H
ATOM   2258 2HG2 ILE A 441      37.250  34.590   8.530  1.00  0.00           H
ATOM   2259 3HG2 ILE A 441      36.990  33.670   9.950  1.00  0.00           H
ATOM   2260  CG1 ILE A 441      34.460  33.070   9.810  1.00  0.00           C
ATOM   2261 1HG1 ILE A 441      33.420  33.390   9.720  1.00  0.00           H
ATOM   2262 2HG1 ILE A 441      34.800  33.280  10.830  1.00  0.00           H
ATOM   2263  CD  ILE A 441      34.530  31.570   9.560  1.00  0.00           C
ATOM   2264  HD1 ILE A 441      34.140  30.980  10.390  1.00  0.00           H
ATOM   2265  HD2 ILE A 441      34.020  31.300   8.630  1.00  0.00           H
ATOM   2266  HD3 ILE A 441      35.560  31.230   9.590  1.00  0.00           H
ATOM   2267  C   ILE A 441      35.800  36.490   8.710  1.00  0.00           C
ATOM   2268  O   ILE A 441      35.460  36.840   7.600  1.00  0.00           O
ATOM   2269  N   LYS A 442      36.880  36.980   9.350  1.00  0.00           N
ATOM   2270  H   LYS A 442      36.850  36.750  10.340  1.00  0.00           H
ATOM   2271  CA  LYS A 442      37.870  37.840   8.770  1.00  0.00           C
ATOM   2272  HA  LYS A 442      38.230  37.430   7.820  1.00  0.00           H
ATOM   2273  CB  LYS A 442      37.380  39.320   8.690  1.00  0.00           C
ATOM   2274  HB1 LYS A 442      36.500  39.250   8.050  1.00  0.00           H
ATOM   2275  HB2 LYS A 442      38.130  39.990   8.250  1.00  0.00           H
ATOM   2276  CG  LYS A 442      37.070  39.890  10.050  1.00  0.00           C
ATOM   2277  HG1 LYS A 442      37.890  39.670  10.740  1.00  0.00           H
ATOM   2278  HG2 LYS A 442      36.210  39.390  10.500  1.00  0.00           H
ATOM   2279  CD  LYS A 442      36.660  41.300  10.080  1.00  0.00           C
ATOM   2280  HD1 LYS A 442      37.500  41.940   9.810  1.00  0.00           H
ATOM   2281  HD2 LYS A 442      36.390  41.470  11.120  1.00  0.00           H
ATOM   2282  CE  LYS A 442      35.450  41.500   9.170  1.00  0.00           C
ATOM   2283  HE1 LYS A 442      35.740  41.470   8.120  1.00  0.00           H
ATOM   2284  HE2 LYS A 442      35.340  42.570   9.360  1.00  0.00           H
ATOM   2285  NZ  LYS A 442      34.290  40.600   9.340  1.00  0.00           N
ATOM   2286  HZ1 LYS A 442      33.880  40.860  10.220  1.00  0.00           H
ATOM   2287  HZ2 LYS A 442      33.660  40.690   8.560  1.00  0.00           H
ATOM   2288  HZ3 LYS A 442      34.570  39.650   9.530  1.00  0.00           H
ATOM   2289  C   LYS A 442      39.170  37.690   9.550  1.00  0.00           C
ATOM   2290  O   LYS A 442      39.160  37.210  10.690  1.00  0.00           O
ATOM   2291  N   SER A 443      40.260  38.400   9.100  1.00  0.00           N
ATOM   2292  H   SER A 443      40.310  38.750   8.160  1.00  0.00           H
ATOM   2293  CA  SER A 443      41.540  38.230   9.790  1.00  0.00           C
ATOM   2294  HA  SER A 443      41.650  37.180  10.060  1.00  0.00           H
ATOM   2295  CB  SER A 443      42.630  38.670   8.800  1.00  0.00           C
ATOM   2296  HB1 SER A 443      43.550  38.480   9.360  1.00  0.00           H
ATOM   2297  HB2 SER A 443      42.560  39.740   8.610  1.00  0.00           H
ATOM   2298  OG  SER A 443      42.620  37.940   7.590  1.00  0.00           O
ATOM   2299  HG  SER A 443      42.180  38.520   6.960  1.00  0.00           H
ATOM   2300  C   SER A 443      41.540  38.990  11.160  1.00  0.00           C
ATOM   2301  O   SER A 443      42.440  38.780  11.970  1.00  0.00           O
ATOM   2302  N   ASP A 444      40.590  39.920  11.490  1.00  0.00           N
ATOM   2303  H   ASP A 444      40.020  40.250  10.720  1.00  0.00           H
ATOM   2304  CA  ASP A 444      40.190  40.460  12.780  1.00  0.00           C
ATOM   2305  HA  ASP A 444      41.050  40.890  13.290  1.00  0.00           H
ATOM   2306  CB  ASP A 444      39.250  41.700  12.680  1.00  0.00           C
ATOM   2307  HB1 ASP A 444      39.110  42.130  13.680  1.00  0.00           H
ATOM   2308  HB2 ASP A 444      38.320  41.360  12.240  1.00  0.00           H
ATOM   2309  CG  ASP A 444      39.830  42.800  11.820  1.00  0.00           C
ATOM   2310  OD1 ASP A 444      41.070  42.990  11.700  1.00  0.00           O
ATOM   2311  OD2 ASP A 444      39.150  43.690  11.240  1.00  0.00           O
ATOM   2312  C   ASP A 444      39.550  39.480  13.750  1.00  0.00           C
ATOM   2313  O   ASP A 444      39.630  39.560  14.980  1.00  0.00           O
ATOM   2314  N   SER A 445      38.690  38.600  13.210  1.00  0.00           N
ATOM   2315  H   SER A 445      38.690  38.490  12.200  1.00  0.00           H
ATOM   2316  CA  SER A 445      38.030  37.590  14.060  1.00  0.00           C
ATOM   2317  HA  SER A 445      37.610  38.060  14.950  1.00  0.00           H
ATOM   2318  CB  SER A 445      37.010  36.730  13.360  1.00  0.00           C
ATOM   2319  HB1 SER A 445      36.300  36.420  14.130  1.00  0.00           H
ATOM   2320  HB2 SER A 445      37.590  35.860  13.040  1.00  0.00           H
ATOM   2321  OG  SER A 445      36.350  37.350  12.250  1.00  0.00           O
ATOM   2322  HG  SER A 445      35.830  38.110  12.540  1.00  0.00           H
ATOM   2323  C   SER A 445      39.060  36.570  14.640  1.00  0.00           C
ATOM   2324  O   SER A 445      38.740  35.790  15.510  1.00  0.00           O
ATOM   2325  N   ILE A 446      40.320  36.520  14.140  1.00  0.00           N
ATOM   2326  H   ILE A 446      40.450  37.170  13.390  1.00  0.00           H
ATOM   2327  CA  ILE A 446      41.310  35.500  14.530  1.00  0.00           C
ATOM   2328  HA  ILE A 446      40.830  34.690  15.080  1.00  0.00           H
ATOM   2329  CB  ILE A 446      41.940  34.710  13.320  1.00  0.00           C
ATOM   2330  HB  ILE A 446      42.660  35.330  12.780  1.00  0.00           H
ATOM   2331  CG2 ILE A 446      42.840  33.580  13.800  1.00  0.00           C
ATOM   2332 1HG2 ILE A 446      43.840  33.980  13.960  1.00  0.00           H
ATOM   2333 2HG2 ILE A 446      42.370  33.090  14.650  1.00  0.00           H
ATOM   2334 3HG2 ILE A 446      42.900  32.770  13.060  1.00  0.00           H
ATOM   2335  CG1 ILE A 446      40.930  34.070  12.350  1.00  0.00           C
ATOM   2336 1HG1 ILE A 446      41.480  33.430  11.650  1.00  0.00           H
ATOM   2337 2HG1 ILE A 446      40.430  34.840  11.770  1.00  0.00           H
ATOM   2338  CD  ILE A 446      39.820  33.230  12.900  1.00  0.00           C
ATOM   2339  HD1 ILE A 446      39.250  33.770  13.650  1.00  0.00           H
ATOM   2340  HD2 ILE A 446      39.110  32.940  12.130  1.00  0.00           H
ATOM   2341  HD3 ILE A 446      40.270  32.410  13.460  1.00  0.00           H
ATOM   2342  C   ILE A 446      42.400  36.160  15.330  1.00  0.00           C
ATOM   2343  O   ILE A 446      43.170  36.970  14.840  1.00  0.00           O
ATOM   2344  N   LEU A 447      42.560  35.750  16.560  1.00  0.00           N
ATOM   2345  H   LEU A 447      41.870  35.170  17.010  1.00  0.00           H
ATOM   2346  CA  LEU A 447      43.480  36.220  17.580  1.00  0.00           C
ATOM   2347  HA  LEU A 447      43.940  37.120  17.180  1.00  0.00           H
ATOM   2348  CB  LEU A 447      42.670  36.510  18.830  1.00  0.00           C
ATOM   2349  HB1 LEU A 447      43.300  36.500  19.730  1.00  0.00           H
ATOM   2350  HB2 LEU A 447      41.960  35.690  18.920  1.00  0.00           H
ATOM   2351  CG  LEU A 447      41.980  37.890  18.830  1.00  0.00           C
ATOM   2352  HG  LEU A 447      41.220  37.840  18.050  1.00  0.00           H
ATOM   2353  CD1 LEU A 447      41.150  38.050  20.120  1.00  0.00           C
ATOM   2354 1HD1 LEU A 447      41.860  38.080  20.940  1.00  0.00           H
ATOM   2355 2HD1 LEU A 447      40.480  38.910  20.090  1.00  0.00           H
ATOM   2356 3HD1 LEU A 447      40.460  37.210  20.200  1.00  0.00           H
ATOM   2357  CD2 LEU A 447      42.940  39.110  18.670  1.00  0.00           C
ATOM   2358 1HD2 LEU A 447      43.790  38.980  19.350  1.00  0.00           H
ATOM   2359 2HD2 LEU A 447      43.280  39.120  17.640  1.00  0.00           H
ATOM   2360 3HD2 LEU A 447      42.460  40.050  18.960  1.00  0.00           H
ATOM   2361  C   LEU A 447      44.630  35.270  17.960  1.00  0.00           C
ATOM   2362  O   LEU A 447      44.390  34.030  18.190  1.00  0.00           O
ATOM   2363  N   LEU A 448      45.810  35.720  18.220  1.00  0.00           N
ATOM   2364  H   LEU A 448      45.910  36.680  17.930  1.00  0.00           H
ATOM   2365  CA  LEU A 448      47.040  34.910  18.420  1.00  0.00           C
ATOM   2366  HA  LEU A 448      46.650  33.900  18.510  1.00  0.00           H
ATOM   2367  CB  LEU A 448      48.000  35.010  17.240  1.00  0.00           C
ATOM   2368  HB1 LEU A 448      49.000  34.630  17.470  1.00  0.00           H
ATOM   2369  HB2 LEU A 448      48.190  36.060  17.010  1.00  0.00           H
ATOM   2370  CG  LEU A 448      47.550  34.240  15.950  1.00  0.00           C
ATOM   2371  HG  LEU A 448      47.160  33.250  16.160  1.00  0.00           H
ATOM   2372  CD1 LEU A 448      46.550  35.030  15.080  1.00  0.00           C
ATOM   2373 1HD1 LEU A 448      45.550  35.040  15.510  1.00  0.00           H
ATOM   2374 2HD1 LEU A 448      47.060  35.980  14.890  1.00  0.00           H
ATOM   2375 3HD1 LEU A 448      46.400  34.550  14.120  1.00  0.00           H
ATOM   2376  CD2 LEU A 448      48.650  34.100  14.960  1.00  0.00           C
ATOM   2377 1HD2 LEU A 448      48.290  33.680  14.020  1.00  0.00           H
ATOM   2378 2HD2 LEU A 448      49.030  35.090  14.700  1.00  0.00           H
ATOM   2379 3HD2 LEU A 448      49.390  33.480  15.470  1.00  0.00           H
ATOM   2380  C   LEU A 448      47.610  35.170  19.800  1.00  0.00           C
ATOM   2381  O   LEU A 448      47.660  36.210  20.310  1.00  0.00           O
ATOM   2382  N   THR A 449      48.160  34.110  20.330  1.00  0.00           N
ATOM   2383  H   THR A 449      48.210  33.260  19.780  1.00  0.00           H
ATOM   2384  CA  THR A 449      48.930  34.080  21.590  1.00  0.00           C
ATOM   2385  HA  THR A 449      48.530  34.900  22.190  1.00  0.00           H
ATOM   2386  CB  THR A 449      48.720  32.810  22.360  1.00  0.00           C
ATOM   2387  HB  THR A 449      49.140  32.930  23.360  1.00  0.00           H
ATOM   2388  CG2 THR A 449      47.270  32.460  22.570  1.00  0.00           C
ATOM   2389 1HG2 THR A 449      46.820  33.240  23.180  1.00  0.00           H
ATOM   2390 2HG2 THR A 449      46.830  32.400  21.580  1.00  0.00           H
ATOM   2391 3HG2 THR A 449      47.260  31.500  23.090  1.00  0.00           H
ATOM   2392  OG1 THR A 449      49.320  31.680  21.680  1.00  0.00           O
ATOM   2393  HG1 THR A 449      49.690  31.220  22.440  1.00  0.00           H
ATOM   2394  C   THR A 449      50.440  34.310  21.430  1.00  0.00           C
ATOM   2395  O   THR A 449      51.020  34.070  20.330  1.00  0.00           O
ATOM   2396  N   HIS A 450      51.120  34.580  22.520  1.00  0.00           N
ATOM   2397  H   HIS A 450      50.650  34.940  23.340  1.00  0.00           H
ATOM   2398  CA  HIS A 450      52.560  34.690  22.500  1.00  0.00           C
ATOM   2399  HA  HIS A 450      52.720  35.430  21.720  1.00  0.00           H
ATOM   2400  CB  HIS A 450      53.040  35.190  23.900  1.00  0.00           C
ATOM   2401  HB1 HIS A 450      52.540  36.050  24.330  1.00  0.00           H
ATOM   2402  HB2 HIS A 450      54.050  35.570  23.730  1.00  0.00           H
ATOM   2403  CG  HIS A 450      53.030  34.130  24.930  1.00  0.00           C
ATOM   2404  ND1 HIS A 450      51.980  33.740  25.780  1.00  0.00           N
ATOM   2405  CE1 HIS A 450      52.400  32.740  26.620  1.00  0.00           C
ATOM   2406  HE1 HIS A 450      51.810  32.230  27.360  1.00  0.00           H
ATOM   2407  NE2 HIS A 450      53.660  32.400  26.240  1.00  0.00           N
ATOM   2408  HE2 HIS A 450      54.130  31.520  26.430  1.00  0.00           H
ATOM   2409  CD2 HIS A 450      54.030  33.240  25.190  1.00  0.00           C
ATOM   2410  HD2 HIS A 450      54.980  33.300  24.670  1.00  0.00           H
ATOM   2411  C   HIS A 450      53.280  33.440  22.020  1.00  0.00           C
ATOM   2412  O   HIS A 450      54.320  33.600  21.420  1.00  0.00           O
ATOM   2413  N   ASP A 451      52.800  32.270  22.340  1.00  0.00           N
ATOM   2414  H   ASP A 451      51.910  32.230  22.820  1.00  0.00           H
ATOM   2415  CA  ASP A 451      53.310  30.970  22.020  1.00  0.00           C
ATOM   2416  HA  ASP A 451      54.370  31.030  21.750  1.00  0.00           H
ATOM   2417  CB  ASP A 451      53.180  30.070  23.300  1.00  0.00           C
ATOM   2418  HB1 ASP A 451      53.590  30.560  24.180  1.00  0.00           H
ATOM   2419  HB2 ASP A 451      53.860  29.220  23.220  1.00  0.00           H
ATOM   2420  CG  ASP A 451      51.660  29.720  23.560  1.00  0.00           C
ATOM   2421  OD1 ASP A 451      51.330  28.570  23.880  1.00  0.00           O
ATOM   2422  OD2 ASP A 451      50.790  30.620  23.540  1.00  0.00           O
ATOM   2423  C   ASP A 451      52.690  30.430  20.740  1.00  0.00           C
ATOM   2424  O   ASP A 451      52.870  29.300  20.310  1.00  0.00           O
ATOM   2425  N   GLY A 452      52.040  31.250  19.910  1.00  0.00           N
ATOM   2426  H   GLY A 452      51.950  32.200  20.250  1.00  0.00           H
ATOM   2427  CA  GLY A 452      51.730  31.010  18.570  1.00  0.00           C
ATOM   2428  HA1 GLY A 452      52.510  30.340  18.200  1.00  0.00           H
ATOM   2429  HA2 GLY A 452      51.790  31.870  17.910  1.00  0.00           H
ATOM   2430  C   GLY A 452      50.440  30.280  18.320  1.00  0.00           C
ATOM   2431  O   GLY A 452      50.270  29.880  17.190  1.00  0.00           O
ATOM   2432  N   ARG A 453      49.540  30.170  19.330  1.00  0.00           N
ATOM   2433  H   ARG A 453      49.800  30.530  20.230  1.00  0.00           H
ATOM   2434  CA  ARG A 453      48.240  29.460  19.220  1.00  0.00           C
ATOM   2435  HA  ARG A 453      48.340  28.560  18.620  1.00  0.00           H
ATOM   2436  CB  ARG A 453      47.810  28.890  20.580  1.00  0.00           C
ATOM   2437  HB1 ARG A 453      46.810  28.470  20.450  1.00  0.00           H
ATOM   2438  HB2 ARG A 453      47.780  29.730  21.280  1.00  0.00           H
ATOM   2439  CG  ARG A 453      48.720  27.810  21.120  1.00  0.00           C
ATOM   2440  HG1 ARG A 453      49.730  28.210  21.100  1.00  0.00           H
ATOM   2441  HG2 ARG A 453      48.680  26.970  20.420  1.00  0.00           H
ATOM   2442  CD  ARG A 453      48.360  27.190  22.500  1.00  0.00           C
ATOM   2443  HD1 ARG A 453      49.070  26.370  22.610  1.00  0.00           H
ATOM   2444  HD2 ARG A 453      47.330  26.850  22.550  1.00  0.00           H
ATOM   2445  NE  ARG A 453      48.540  28.130  23.630  1.00  0.00           N
ATOM   2446  HE  ARG A 453      49.470  28.500  23.700  1.00  0.00           H
ATOM   2447  CZ  ARG A 453      47.650  28.950  24.140  1.00  0.00           C
ATOM   2448  NH1 ARG A 453      46.380  28.630  24.130  1.00  0.00           N
ATOM   2449 1HH1 ARG A 453      46.060  27.800  23.650  1.00  0.00           H
ATOM   2450 2HH1 ARG A 453      45.730  29.270  24.550  1.00  0.00           H
ATOM   2451  NH2 ARG A 453      47.880  29.970  24.960  1.00  0.00           N
ATOM   2452 1HH2 ARG A 453      48.790  30.330  25.200  1.00  0.00           H
ATOM   2453 2HH2 ARG A 453      47.100  30.570  25.160  1.00  0.00           H
ATOM   2454  C   ARG A 453      47.190  30.450  18.720  1.00  0.00           C
ATOM   2455  O   ARG A 453      47.120  31.610  19.150  1.00  0.00           O
ATOM   2456  N   VAL A 454      46.240  29.890  17.940  1.00  0.00           N
ATOM   2457  H   VAL A 454      46.360  28.900  17.800  1.00  0.00           H
ATOM   2458  CA  VAL A 454      45.290  30.610  17.050  1.00  0.00           C
ATOM   2459  HA  VAL A 454      45.450  31.690  17.030  1.00  0.00           H
ATOM   2460  CB  VAL A 454      45.520  30.190  15.560  1.00  0.00           C
ATOM   2461  HB  VAL A 454      45.120  29.180  15.440  1.00  0.00           H
ATOM   2462  CG1 VAL A 454      44.790  30.980  14.460  1.00  0.00           C
ATOM   2463 1HG1 VAL A 454      43.730  30.760  14.430  1.00  0.00           H
ATOM   2464 2HG1 VAL A 454      45.000  32.030  14.670  1.00  0.00           H
ATOM   2465 3HG1 VAL A 454      45.170  30.700  13.470  1.00  0.00           H
ATOM   2466  CG2 VAL A 454      47.030  30.030  15.220  1.00  0.00           C
ATOM   2467 1HG2 VAL A 454      47.500  29.240  15.810  1.00  0.00           H
ATOM   2468 2HG2 VAL A 454      47.240  29.760  14.180  1.00  0.00           H
ATOM   2469 3HG2 VAL A 454      47.640  30.890  15.460  1.00  0.00           H
ATOM   2470  C   VAL A 454      43.850  30.440  17.600  1.00  0.00           C
ATOM   2471  O   VAL A 454      43.370  29.310  17.490  1.00  0.00           O
ATOM   2472  N   LYS A 455      43.110  31.530  18.000  1.00  0.00           N
ATOM   2473  H   LYS A 455      43.480  32.460  17.960  1.00  0.00           H
ATOM   2474  CA  LYS A 455      41.670  31.520  18.440  1.00  0.00           C
ATOM   2475  HA  LYS A 455      41.300  30.500  18.270  1.00  0.00           H
ATOM   2476  CB  LYS A 455      41.530  31.740  19.960  1.00  0.00           C
ATOM   2477  HB1 LYS A 455      40.480  31.540  20.130  1.00  0.00           H
ATOM   2478  HB2 LYS A 455      41.710  32.800  20.130  1.00  0.00           H
ATOM   2479  CG  LYS A 455      42.490  30.980  20.790  1.00  0.00           C
ATOM   2480  HG1 LYS A 455      43.470  31.450  20.870  1.00  0.00           H
ATOM   2481  HG2 LYS A 455      42.610  29.960  20.410  1.00  0.00           H
ATOM   2482  CD  LYS A 455      41.980  30.920  22.210  1.00  0.00           C
ATOM   2483  HD1 LYS A 455      41.050  30.350  22.270  1.00  0.00           H
ATOM   2484  HD2 LYS A 455      41.820  31.880  22.700  1.00  0.00           H
ATOM   2485  CE  LYS A 455      42.990  30.120  23.100  1.00  0.00           C
ATOM   2486  HE1 LYS A 455      43.890  30.710  22.980  1.00  0.00           H
ATOM   2487  HE2 LYS A 455      43.080  29.130  22.640  1.00  0.00           H
ATOM   2488  NZ  LYS A 455      42.450  29.940  24.410  1.00  0.00           N
ATOM   2489  HZ1 LYS A 455      41.480  29.660  24.520  1.00  0.00           H
ATOM   2490  HZ2 LYS A 455      42.940  29.110  24.730  1.00  0.00           H
ATOM   2491  HZ3 LYS A 455      42.650  30.720  25.020  1.00  0.00           H
ATOM   2492  C   LYS A 455      40.670  32.430  17.730  1.00  0.00           C
ATOM   2493  O   LYS A 455      41.000  33.570  17.460  1.00  0.00           O
ATOM   2494  N   LEU A 456      39.450  31.870  17.570  1.00  0.00           N
ATOM   2495  H   LEU A 456      39.370  30.890  17.810  1.00  0.00           H
ATOM   2496  CA  LEU A 456      38.220  32.470  17.070  1.00  0.00           C
ATOM   2497  HA  LEU A 456      38.480  33.170  16.280  1.00  0.00           H
ATOM   2498  CB  LEU A 456      37.470  31.360  16.310  1.00  0.00           C
ATOM   2499  HB1 LEU A 456      37.430  30.470  16.950  1.00  0.00           H
ATOM   2500  HB2 LEU A 456      38.110  31.020  15.500  1.00  0.00           H
ATOM   2501  CG  LEU A 456      36.190  31.840  15.680  1.00  0.00           C
ATOM   2502  HG  LEU A 456      35.670  32.320  16.510  1.00  0.00           H
ATOM   2503  CD1 LEU A 456      36.340  32.860  14.600  1.00  0.00           C
ATOM   2504 1HD1 LEU A 456      37.030  33.680  14.810  1.00  0.00           H
ATOM   2505 2HD1 LEU A 456      36.550  32.430  13.620  1.00  0.00           H
ATOM   2506 3HD1 LEU A 456      35.400  33.410  14.540  1.00  0.00           H
ATOM   2507  CD2 LEU A 456      35.460  30.680  15.040  1.00  0.00           C
ATOM   2508 1HD2 LEU A 456      35.090  29.920  15.720  1.00  0.00           H
ATOM   2509 2HD2 LEU A 456      34.570  31.070  14.540  1.00  0.00           H
ATOM   2510 3HD2 LEU A 456      36.090  30.160  14.310  1.00  0.00           H
ATOM   2511  C   LEU A 456      37.610  33.350  18.140  1.00  0.00           C
ATOM   2512  O   LEU A 456      37.660  33.070  19.320  1.00  0.00           O
ATOM   2513  N   SER A 457      37.060  34.480  17.740  1.00  0.00           N
ATOM   2514  H   SER A 457      36.860  34.470  16.750  1.00  0.00           H
ATOM   2515  CA  SER A 457      36.690  35.570  18.550  1.00  0.00           C
ATOM   2516  HA  SER A 457      36.240  35.190  19.460  1.00  0.00           H
ATOM   2517  CB  SER A 457      37.890  36.510  18.800  1.00  0.00           C
ATOM   2518  HB1 SER A 457      38.700  35.830  19.060  1.00  0.00           H
ATOM   2519  HB2 SER A 457      37.670  37.120  19.670  1.00  0.00           H
ATOM   2520  OG  SER A 457      38.310  37.340  17.710  1.00  0.00           O
ATOM   2521  HG  SER A 457      38.740  36.780  17.050  1.00  0.00           H
ATOM   2522  C   SER A 457      35.570  36.370  17.800  1.00  0.00           C
ATOM   2523  O   SER A 457      35.350  36.070  16.610  1.00  0.00           O
ATOM   2524  N   ASP A 458      35.070  37.450  18.410  1.00  0.00           N
ATOM   2525  H   ASP A 458      35.330  37.490  19.390  1.00  0.00           H
ATOM   2526  CA  ASP A 458      34.280  38.470  17.800  1.00  0.00           C
ATOM   2527  HA  ASP A 458      33.870  39.040  18.640  1.00  0.00           H
ATOM   2528  CB  ASP A 458      35.060  39.200  16.750  1.00  0.00           C
ATOM   2529  HB1 ASP A 458      35.330  38.600  15.880  1.00  0.00           H
ATOM   2530  HB2 ASP A 458      36.060  39.430  17.120  1.00  0.00           H
ATOM   2531  CG  ASP A 458      34.360  40.510  16.290  1.00  0.00           C
ATOM   2532  OD1 ASP A 458      34.820  41.050  15.270  1.00  0.00           O
ATOM   2533  OD2 ASP A 458      33.410  40.960  16.960  1.00  0.00           O
ATOM   2534  C   ASP A 458      32.960  37.840  17.270  1.00  0.00           C
ATOM   2535  O   ASP A 458      32.640  38.070  16.150  1.00  0.00           O
ATOM   2536  N   PHE A 459      32.140  37.180  18.110  1.00  0.00           N
ATOM   2537  H   PHE A 459      32.520  37.050  19.040  1.00  0.00           H
ATOM   2538  CA  PHE A 459      30.870  36.600  17.830  1.00  0.00           C
ATOM   2539  HA  PHE A 459      30.960  36.150  16.840  1.00  0.00           H
ATOM   2540  CB  PHE A 459      30.610  35.460  18.900  1.00  0.00           C
ATOM   2541  HB1 PHE A 459      29.550  35.350  19.140  1.00  0.00           H
ATOM   2542  HB2 PHE A 459      31.100  35.640  19.860  1.00  0.00           H
ATOM   2543  CG  PHE A 459      31.320  34.190  18.490  1.00  0.00           C
ATOM   2544  CD1 PHE A 459      30.580  33.040  18.110  1.00  0.00           C
ATOM   2545  HD1 PHE A 459      29.500  33.040  18.010  1.00  0.00           H
ATOM   2546  CE1 PHE A 459      31.220  31.890  17.730  1.00  0.00           C
ATOM   2547  HE1 PHE A 459      30.680  31.010  17.420  1.00  0.00           H
ATOM   2548  CZ  PHE A 459      32.640  31.820  17.680  1.00  0.00           C
ATOM   2549  HZ  PHE A 459      33.150  31.000  17.200  1.00  0.00           H
ATOM   2550  CE2 PHE A 459      33.430  32.920  18.070  1.00  0.00           C
ATOM   2551  HE2 PHE A 459      34.510  32.900  18.060  1.00  0.00           H
ATOM   2552  CD2 PHE A 459      32.730  34.090  18.450  1.00  0.00           C
ATOM   2553  HD2 PHE A 459      33.180  35.020  18.770  1.00  0.00           H
ATOM   2554  C   PHE A 459      29.740  37.680  17.820  1.00  0.00           C
ATOM   2555  O   PHE A 459      28.570  37.370  17.920  1.00  0.00           O
ATOM   2556  N   GLY A 460      30.130  38.950  17.670  1.00  0.00           N
ATOM   2557  H   GLY A 460      31.120  39.150  17.660  1.00  0.00           H
ATOM   2558  CA  GLY A 460      29.240  40.160  17.630  1.00  0.00           C
ATOM   2559  HA1 GLY A 460      29.900  41.010  17.440  1.00  0.00           H
ATOM   2560  HA2 GLY A 460      28.810  40.500  18.570  1.00  0.00           H
ATOM   2561  C   GLY A 460      28.080  40.160  16.570  1.00  0.00           C
ATOM   2562  O   GLY A 460      27.250  41.050  16.620  1.00  0.00           O
ATOM   2563  N   PHE A 461      28.040  39.190  15.630  1.00  0.00           N
ATOM   2564  H   PHE A 461      28.780  38.520  15.490  1.00  0.00           H
ATOM   2565  CA  PHE A 461      26.920  38.980  14.660  1.00  0.00           C
ATOM   2566  HA  PHE A 461      25.980  39.410  15.010  1.00  0.00           H
ATOM   2567  CB  PHE A 461      27.310  39.540  13.210  1.00  0.00           C
ATOM   2568  HB1 PHE A 461      26.600  39.250  12.440  1.00  0.00           H
ATOM   2569  HB2 PHE A 461      28.170  39.030  12.790  1.00  0.00           H
ATOM   2570  CG  PHE A 461      27.460  41.010  13.200  1.00  0.00           C
ATOM   2571  CD1 PHE A 461      28.780  41.470  13.040  1.00  0.00           C
ATOM   2572  HD1 PHE A 461      29.620  40.790  13.040  1.00  0.00           H
ATOM   2573  CE1 PHE A 461      28.930  42.880  12.850  1.00  0.00           C
ATOM   2574  HE1 PHE A 461      29.920  43.270  12.700  1.00  0.00           H
ATOM   2575  CZ  PHE A 461      27.810  43.780  12.790  1.00  0.00           C
ATOM   2576  HZ  PHE A 461      28.030  44.830  12.670  1.00  0.00           H
ATOM   2577  CE2 PHE A 461      26.510  43.300  12.980  1.00  0.00           C
ATOM   2578  HE2 PHE A 461      25.680  43.980  12.930  1.00  0.00           H
ATOM   2579  CD2 PHE A 461      26.320  41.870  13.080  1.00  0.00           C
ATOM   2580  HD2 PHE A 461      25.310  41.520  13.210  1.00  0.00           H
ATOM   2581  C   PHE A 461      26.510  37.480  14.610  1.00  0.00           C
ATOM   2582  O   PHE A 461      25.940  37.060  13.610  1.00  0.00           O
ATOM   2583  N   CYS A 462      26.810  36.690  15.640  1.00  0.00           N
ATOM   2584  H   CYS A 462      27.090  37.110  16.520  1.00  0.00           H
ATOM   2585  CA  CYS A 462      26.620  35.270  15.450  1.00  0.00           C
ATOM   2586  HA  CYS A 462      27.100  35.000  14.510  1.00  0.00           H
ATOM   2587  CB  CYS A 462      27.600  34.560  16.490  1.00  0.00           C
ATOM   2588  HB1 CYS A 462      28.590  35.010  16.430  1.00  0.00           H
ATOM   2589  HB2 CYS A 462      27.670  33.520  16.180  1.00  0.00           H
ATOM   2590  SG  CYS A 462      26.870  34.640  18.200  1.00  0.00           S
ATOM   2591  HG  CYS A 462      26.950  35.960  18.390  1.00  0.00           H
ATOM   2592  C   CYS A 462      25.140  34.830  15.470  1.00  0.00           C
ATOM   2593  O   CYS A 462      24.200  35.630  15.760  1.00  0.00           O
ATOM   2594  N   ALA A 463      24.940  33.660  14.850  1.00  0.00           N
ATOM   2595  H   ALA A 463      25.760  33.140  14.560  1.00  0.00           H
ATOM   2596  CA  ALA A 463      23.630  32.980  14.780  1.00  0.00           C
ATOM   2597  HA  ALA A 463      22.920  33.420  15.480  1.00  0.00           H
ATOM   2598  CB  ALA A 463      23.100  33.190  13.360  1.00  0.00           C
ATOM   2599  HB1 ALA A 463      22.730  34.200  13.190  1.00  0.00           H
ATOM   2600  HB2 ALA A 463      23.930  32.900  12.710  1.00  0.00           H
ATOM   2601  HB3 ALA A 463      22.180  32.660  13.130  1.00  0.00           H
ATOM   2602  C   ALA A 463      23.760  31.580  15.310  1.00  0.00           C
ATOM   2603  O   ALA A 463      24.860  31.070  15.610  1.00  0.00           O
ATOM   2604  N   GLN A 464      22.620  30.990  15.550  1.00  0.00           N
ATOM   2605  H   GLN A 464      21.820  31.600  15.650  1.00  0.00           H
ATOM   2606  CA  GLN A 464      22.430  29.500  15.700  1.00  0.00           C
ATOM   2607  HA  GLN A 464      23.380  29.080  15.370  1.00  0.00           H
ATOM   2608  CB  GLN A 464      22.300  29.040  17.090  1.00  0.00           C
ATOM   2609  HB1 GLN A 464      22.320  27.950  17.070  1.00  0.00           H
ATOM   2610  HB2 GLN A 464      21.340  29.410  17.440  1.00  0.00           H
ATOM   2611  CG  GLN A 464      23.470  29.610  17.960  1.00  0.00           C
ATOM   2612  HG1 GLN A 464      23.560  30.690  17.860  1.00  0.00           H
ATOM   2613  HG2 GLN A 464      24.400  29.070  17.760  1.00  0.00           H
ATOM   2614  CD  GLN A 464      23.190  29.380  19.450  1.00  0.00           C
ATOM   2615  OE1 GLN A 464      23.540  28.320  20.020  1.00  0.00           O
ATOM   2616  NE2 GLN A 464      22.590  30.380  20.080  1.00  0.00           N
ATOM   2617 1HE2 GLN A 464      22.490  31.250  19.580  1.00  0.00           H
ATOM   2618 2HE2 GLN A 464      22.280  30.250  21.030  1.00  0.00           H
ATOM   2619  C   GLN A 464      21.360  28.990  14.760  1.00  0.00           C
ATOM   2620  O   GLN A 464      20.390  29.700  14.470  1.00  0.00           O
ATOM   2621  N   VAL A 465      21.540  27.680  14.280  1.00  0.00           N
ATOM   2622  H   VAL A 465      22.390  27.170  14.500  1.00  0.00           H
ATOM   2623  CA  VAL A 465      20.430  26.820  13.770  1.00  0.00           C
ATOM   2624  HA  VAL A 465      19.530  27.430  13.700  1.00  0.00           H
ATOM   2625  CB  VAL A 465      20.680  26.400  12.380  1.00  0.00           C
ATOM   2626  HB  VAL A 465      20.050  25.510  12.230  1.00  0.00           H
ATOM   2627  CG1 VAL A 465      20.410  27.500  11.400  1.00  0.00           C
ATOM   2628 1HG1 VAL A 465      19.350  27.770  11.390  1.00  0.00           H
ATOM   2629 2HG1 VAL A 465      21.000  28.360  11.690  1.00  0.00           H
ATOM   2630 3HG1 VAL A 465      20.660  27.110  10.410  1.00  0.00           H
ATOM   2631  CG2 VAL A 465      22.110  25.860  12.070  1.00  0.00           C
ATOM   2632 1HG2 VAL A 465      22.930  26.530  12.330  1.00  0.00           H
ATOM   2633 2HG2 VAL A 465      22.320  25.080  12.790  1.00  0.00           H
ATOM   2634 3HG2 VAL A 465      22.120  25.400  11.080  1.00  0.00           H
ATOM   2635  C   VAL A 465      20.150  25.590  14.660  1.00  0.00           C
ATOM   2636  O   VAL A 465      21.050  25.120  15.310  1.00  0.00           O
ATOM   2637  N   SER A 466      18.870  25.230  14.690  1.00  0.00           N
ATOM   2638  H   SER A 466      18.360  25.790  14.030  1.00  0.00           H
ATOM   2639  CA  SER A 466      18.160  24.310  15.530  1.00  0.00           C
ATOM   2640  HA  SER A 466      18.950  23.620  15.850  1.00  0.00           H
ATOM   2641  CB  SER A 466      17.740  25.110  16.850  1.00  0.00           C
ATOM   2642  HB1 SER A 466      18.570  25.810  16.960  1.00  0.00           H
ATOM   2643  HB2 SER A 466      17.710  24.480  17.740  1.00  0.00           H
ATOM   2644  OG  SER A 466      16.520  25.910  16.710  1.00  0.00           O
ATOM   2645  HG  SER A 466      16.630  26.670  17.290  1.00  0.00           H
ATOM   2646  C   SER A 466      17.030  23.560  14.910  1.00  0.00           C
ATOM   2647  O   SER A 466      16.540  23.780  13.820  1.00  0.00           O
ATOM   2648  N   LYS A 467      16.500  22.580  15.680  1.00  0.00           N
ATOM   2649  H   LYS A 467      16.970  22.440  16.560  1.00  0.00           H
ATOM   2650  CA  LYS A 467      15.290  21.860  15.380  1.00  0.00           C
ATOM   2651  HA  LYS A 467      15.400  21.470  14.370  1.00  0.00           H
ATOM   2652  CB  LYS A 467      15.110  20.670  16.390  1.00  0.00           C
ATOM   2653  HB1 LYS A 467      14.160  20.170  16.180  1.00  0.00           H
ATOM   2654  HB2 LYS A 467      15.190  21.160  17.360  1.00  0.00           H
ATOM   2655  CG  LYS A 467      16.290  19.700  16.180  1.00  0.00           C
ATOM   2656  HG1 LYS A 467      17.220  20.270  16.240  1.00  0.00           H
ATOM   2657  HG2 LYS A 467      16.200  19.380  15.140  1.00  0.00           H
ATOM   2658  CD  LYS A 467      16.270  18.570  17.160  1.00  0.00           C
ATOM   2659  HD1 LYS A 467      15.430  17.890  17.240  1.00  0.00           H
ATOM   2660  HD2 LYS A 467      16.490  18.900  18.180  1.00  0.00           H
ATOM   2661  CE  LYS A 467      17.440  17.660  16.780  1.00  0.00           C
ATOM   2662  HE1 LYS A 467      18.340  18.270  16.750  1.00  0.00           H
ATOM   2663  HE2 LYS A 467      17.230  17.220  15.810  1.00  0.00           H
ATOM   2664  NZ  LYS A 467      17.640  16.540  17.650  1.00  0.00           N
ATOM   2665  HZ1 LYS A 467      17.680  16.770  18.640  1.00  0.00           H
ATOM   2666  HZ2 LYS A 467      16.930  15.860  17.430  1.00  0.00           H
ATOM   2667  HZ3 LYS A 467      18.530  16.130  17.420  1.00  0.00           H
ATOM   2668  C   LYS A 467      14.050  22.690  15.370  1.00  0.00           C
ATOM   2669  O   LYS A 467      13.120  22.500  14.620  1.00  0.00           O
ATOM   2670  N   GLU A 468      14.040  23.750  16.140  1.00  0.00           N
ATOM   2671  H   GLU A 468      14.880  23.950  16.680  1.00  0.00           H
ATOM   2672  CA  GLU A 468      13.160  24.810  15.930  1.00  0.00           C
ATOM   2673  HA  GLU A 468      12.140  24.430  15.860  1.00  0.00           H
ATOM   2674  CB  GLU A 468      13.150  25.580  17.310  1.00  0.00           C
ATOM   2675  HB1 GLU A 468      12.470  26.430  17.320  1.00  0.00           H
ATOM   2676  HB2 GLU A 468      14.120  26.040  17.480  1.00  0.00           H
ATOM   2677  CG  GLU A 468      12.740  24.660  18.490  1.00  0.00           C
ATOM   2678  HG1 GLU A 468      13.510  23.910  18.660  1.00  0.00           H
ATOM   2679  HG2 GLU A 468      11.760  24.210  18.340  1.00  0.00           H
ATOM   2680  CD  GLU A 468      12.630  25.450  19.810  1.00  0.00           C
ATOM   2681  OE1 GLU A 468      11.520  25.910  20.180  1.00  0.00           O
ATOM   2682  OE2 GLU A 468      13.620  25.640  20.540  1.00  0.00           O
ATOM   2683  C   GLU A 468      13.430  25.750  14.750  1.00  0.00           C
ATOM   2684  O   GLU A 468      12.470  26.180  14.110  1.00  0.00           O
ATOM   2685  N   VAL A 469      14.680  26.060  14.530  1.00  0.00           N
ATOM   2686  H   VAL A 469      15.310  25.710  15.240  1.00  0.00           H
ATOM   2687  CA  VAL A 469      15.130  27.010  13.480  1.00  0.00           C
ATOM   2688  HA  VAL A 469      14.340  27.310  12.800  1.00  0.00           H
ATOM   2689  CB  VAL A 469      15.710  28.290  14.160  1.00  0.00           C
ATOM   2690  HB  VAL A 469      16.650  28.020  14.640  1.00  0.00           H
ATOM   2691  CG1 VAL A 469      15.940  29.450  13.170  1.00  0.00           C
ATOM   2692 1HG1 VAL A 469      15.060  29.610  12.550  1.00  0.00           H
ATOM   2693 2HG1 VAL A 469      16.040  30.370  13.740  1.00  0.00           H
ATOM   2694 3HG1 VAL A 469      16.880  29.320  12.620  1.00  0.00           H
ATOM   2695  CG2 VAL A 469      15.020  28.870  15.390  1.00  0.00           C
ATOM   2696 1HG2 VAL A 469      15.610  29.700  15.780  1.00  0.00           H
ATOM   2697 2HG2 VAL A 469      14.040  29.240  15.080  1.00  0.00           H
ATOM   2698 3HG2 VAL A 469      15.060  28.120  16.180  1.00  0.00           H
ATOM   2699  C   VAL A 469      16.200  26.310  12.540  1.00  0.00           C
ATOM   2700  O   VAL A 469      17.380  26.590  12.660  1.00  0.00           O
ATOM   2701  N   PRO A 470      15.840  25.460  11.590  1.00  0.00           N
ATOM   2702  CD  PRO A 470      14.450  24.910  11.510  1.00  0.00           C
ATOM   2703  HD1 PRO A 470      13.790  25.770  11.420  1.00  0.00           H
ATOM   2704  HD2 PRO A 470      14.290  24.230  12.340  1.00  0.00           H
ATOM   2705  CG  PRO A 470      14.580  24.170  10.160  1.00  0.00           C
ATOM   2706  HG1 PRO A 470      14.310  24.810   9.320  1.00  0.00           H
ATOM   2707  HG2 PRO A 470      13.920  23.310  10.280  1.00  0.00           H
ATOM   2708  CB  PRO A 470      16.030  23.740  10.000  1.00  0.00           C
ATOM   2709  HB1 PRO A 470      16.390  23.520   9.000  1.00  0.00           H
ATOM   2710  HB2 PRO A 470      16.160  22.810  10.550  1.00  0.00           H
ATOM   2711  CA  PRO A 470      16.780  24.780  10.680  1.00  0.00           C
ATOM   2712  HA  PRO A 470      17.580  24.270  11.210  1.00  0.00           H
ATOM   2713  C   PRO A 470      17.520  25.760   9.710  1.00  0.00           C
ATOM   2714  O   PRO A 470      18.680  25.420   9.340  1.00  0.00           O
ATOM   2715  N   ARG A 471      16.950  26.930   9.370  1.00  0.00           N
ATOM   2716  H   ARG A 471      16.230  27.250  10.000  1.00  0.00           H
ATOM   2717  CA  ARG A 471      17.570  27.920   8.460  1.00  0.00           C
ATOM   2718  HA  ARG A 471      18.600  27.580   8.360  1.00  0.00           H
ATOM   2719  CB  ARG A 471      16.930  27.870   7.050  1.00  0.00           C
ATOM   2720  HB1 ARG A 471      17.240  28.730   6.460  1.00  0.00           H
ATOM   2721  HB2 ARG A 471      15.840  27.890   7.060  1.00  0.00           H
ATOM   2722  CG  ARG A 471      17.240  26.570   6.240  1.00  0.00           C
ATOM   2723  HG1 ARG A 471      16.660  26.720   5.340  1.00  0.00           H
ATOM   2724  HG2 ARG A 471      16.940  25.700   6.830  1.00  0.00           H
ATOM   2725  CD  ARG A 471      18.720  26.370   5.770  1.00  0.00           C
ATOM   2726  HD1 ARG A 471      19.230  27.290   5.480  1.00  0.00           H
ATOM   2727  HD2 ARG A 471      18.580  25.820   4.840  1.00  0.00           H
ATOM   2728  NE  ARG A 471      19.570  25.560   6.770  1.00  0.00           N
ATOM   2729  HE  ARG A 471      19.440  25.740   7.760  1.00  0.00           H
ATOM   2730  CZ  ARG A 471      20.400  24.600   6.460  1.00  0.00           C
ATOM   2731  NH1 ARG A 471      20.640  24.320   5.230  1.00  0.00           N
ATOM   2732 1HH1 ARG A 471      20.210  24.940   4.560  1.00  0.00           H
ATOM   2733 2HH1 ARG A 471      21.350  23.640   4.990  1.00  0.00           H
ATOM   2734  NH2 ARG A 471      21.070  23.950   7.320  1.00  0.00           N
ATOM   2735 1HH2 ARG A 471      20.950  24.000   8.320  1.00  0.00           H
ATOM   2736 2HH2 ARG A 471      21.780  23.320   6.960  1.00  0.00           H
ATOM   2737  C   ARG A 471      17.470  29.290   9.030  1.00  0.00           C
ATOM   2738  O   ARG A 471      16.750  29.530   9.950  1.00  0.00           O
ATOM   2739  N   ARG A 472      18.290  30.260   8.530  1.00  0.00           N
ATOM   2740  H   ARG A 472      18.920  30.010   7.780  1.00  0.00           H
ATOM   2741  CA  ARG A 472      18.140  31.700   8.730  1.00  0.00           C
ATOM   2742  HA  ARG A 472      17.280  31.950   9.350  1.00  0.00           H
ATOM   2743  CB  ARG A 472      19.380  32.240   9.450  1.00  0.00           C
ATOM   2744  HB1 ARG A 472      19.250  33.310   9.640  1.00  0.00           H
ATOM   2745  HB2 ARG A 472      20.190  32.110   8.740  1.00  0.00           H
ATOM   2746  CG  ARG A 472      19.580  31.630  10.830  1.00  0.00           C
ATOM   2747  HG1 ARG A 472      20.620  31.660  11.160  1.00  0.00           H
ATOM   2748  HG2 ARG A 472      19.290  30.580  10.870  1.00  0.00           H
ATOM   2749  CD  ARG A 472      18.680  32.370  11.900  1.00  0.00           C
ATOM   2750  HD1 ARG A 472      17.640  32.410  11.590  1.00  0.00           H
ATOM   2751  HD2 ARG A 472      19.200  33.310  12.080  1.00  0.00           H
ATOM   2752  NE  ARG A 472      18.770  31.620  13.130  1.00  0.00           N
ATOM   2753  HE  ARG A 472      19.510  30.940  13.230  1.00  0.00           H
ATOM   2754  CZ  ARG A 472      18.120  31.870  14.240  1.00  0.00           C
ATOM   2755  NH1 ARG A 472      17.130  32.720  14.300  1.00  0.00           N
ATOM   2756 1HH1 ARG A 472      16.780  33.120  13.440  1.00  0.00           H
ATOM   2757 2HH1 ARG A 472      16.730  32.930  15.200  1.00  0.00           H
ATOM   2758  NH2 ARG A 472      18.410  31.240  15.280  1.00  0.00           N
ATOM   2759 1HH2 ARG A 472      19.150  30.550  15.190  1.00  0.00           H
ATOM   2760 2HH2 ARG A 472      18.030  31.610  16.140  1.00  0.00           H
ATOM   2761  C   ARG A 472      17.940  32.480   7.470  1.00  0.00           C
ATOM   2762  O   ARG A 472      18.220  32.040   6.370  1.00  0.00           O
ATOM   2763  N   LYS A 473      17.580  33.750   7.530  1.00  0.00           N
ATOM   2764  H   LYS A 473      17.390  34.120   8.440  1.00  0.00           H
ATOM   2765  CA  LYS A 473      17.250  34.590   6.360  1.00  0.00           C
ATOM   2766  HA  LYS A 473      17.930  34.270   5.580  1.00  0.00           H
ATOM   2767  CB  LYS A 473      15.790  34.390   6.000  1.00  0.00           C
ATOM   2768  HB1 LYS A 473      15.170  35.110   6.530  1.00  0.00           H
ATOM   2769  HB2 LYS A 473      15.450  33.380   6.240  1.00  0.00           H
ATOM   2770  CG  LYS A 473      15.610  34.520   4.490  1.00  0.00           C
ATOM   2771  HG1 LYS A 473      16.380  34.030   3.900  1.00  0.00           H
ATOM   2772  HG2 LYS A 473      15.750  35.560   4.210  1.00  0.00           H
ATOM   2773  CD  LYS A 473      14.220  33.930   4.120  1.00  0.00           C
ATOM   2774  HD1 LYS A 473      13.510  34.440   4.780  1.00  0.00           H
ATOM   2775  HD2 LYS A 473      14.260  32.850   4.280  1.00  0.00           H
ATOM   2776  CE  LYS A 473      13.940  34.080   2.600  1.00  0.00           C
ATOM   2777  HE1 LYS A 473      13.060  33.540   2.260  1.00  0.00           H
ATOM   2778  HE2 LYS A 473      14.780  33.590   2.100  1.00  0.00           H
ATOM   2779  NZ  LYS A 473      13.950  35.550   2.270  1.00  0.00           N
ATOM   2780  HZ1 LYS A 473      14.820  36.010   2.480  1.00  0.00           H
ATOM   2781  HZ2 LYS A 473      13.830  35.590   1.270  1.00  0.00           H
ATOM   2782  HZ3 LYS A 473      13.230  36.090   2.730  1.00  0.00           H
ATOM   2783  C   LYS A 473      17.610  36.110   6.430  1.00  0.00           C
ATOM   2784  O   LYS A 473      17.480  36.840   5.430  1.00  0.00           O
ATOM   2785  N   SER A 474      18.030  36.600   7.630  1.00  0.00           N
ATOM   2786  H   SER A 474      18.030  35.990   8.430  1.00  0.00           H
ATOM   2787  CA  SER A 474      18.620  38.000   7.940  1.00  0.00           C
ATOM   2788  HA  SER A 474      17.950  38.820   7.680  1.00  0.00           H
ATOM   2789  CB  SER A 474      18.820  38.050   9.480  1.00  0.00           C
ATOM   2790  HB1 SER A 474      19.580  37.320   9.770  1.00  0.00           H
ATOM   2791  HB2 SER A 474      17.870  37.780   9.940  1.00  0.00           H
ATOM   2792  OG  SER A 474      19.090  39.280  10.000  1.00  0.00           O
ATOM   2793  HG  SER A 474      19.010  39.180  10.950  1.00  0.00           H
ATOM   2794  C   SER A 474      19.990  38.280   7.220  1.00  0.00           C
ATOM   2795  O   SER A 474      20.820  37.380   7.080  1.00  0.00           O
ATOM   2796  N   LEU A 475      20.280  39.520   6.860  1.00  0.00           N
ATOM   2797  H   LEU A 475      19.470  40.130   6.860  1.00  0.00           H
ATOM   2798  CA  LEU A 475      21.560  40.210   6.590  1.00  0.00           C
ATOM   2799  HA  LEU A 475      22.180  39.370   6.290  1.00  0.00           H
ATOM   2800  CB  LEU A 475      21.370  41.160   5.420  1.00  0.00           C
ATOM   2801  HB1 LEU A 475      20.810  42.050   5.720  1.00  0.00           H
ATOM   2802  HB2 LEU A 475      20.780  40.630   4.670  1.00  0.00           H
ATOM   2803  CG  LEU A 475      22.640  41.570   4.670  1.00  0.00           C
ATOM   2804  HG  LEU A 475      23.400  40.800   4.610  1.00  0.00           H
ATOM   2805  CD1 LEU A 475      22.400  41.890   3.160  1.00  0.00           C
ATOM   2806 1HD1 LEU A 475      21.870  41.070   2.670  1.00  0.00           H
ATOM   2807 2HD1 LEU A 475      21.780  42.790   3.130  1.00  0.00           H
ATOM   2808 3HD1 LEU A 475      23.320  42.120   2.630  1.00  0.00           H
ATOM   2809  CD2 LEU A 475      23.160  42.810   5.260  1.00  0.00           C
ATOM   2810 1HD2 LEU A 475      23.840  43.260   4.540  1.00  0.00           H
ATOM   2811 2HD2 LEU A 475      22.370  43.540   5.390  1.00  0.00           H
ATOM   2812 3HD2 LEU A 475      23.790  42.630   6.130  1.00  0.00           H
ATOM   2813  C   LEU A 475      22.130  40.930   7.850  1.00  0.00           C
ATOM   2814  O   LEU A 475      21.490  41.720   8.490  1.00  0.00           O
ATOM   2815  N   VAL A 476      23.440  40.770   8.070  1.00  0.00           N
ATOM   2816  H   VAL A 476      23.900  40.030   7.550  1.00  0.00           H
ATOM   2817  CA  VAL A 476      24.220  41.290   9.240  1.00  0.00           C
ATOM   2818  HA  VAL A 476      23.660  42.120   9.660  1.00  0.00           H
ATOM   2819  CB  VAL A 476      24.370  40.340  10.460  1.00  0.00           C
ATOM   2820  HB  VAL A 476      25.120  40.800  11.100  1.00  0.00           H
ATOM   2821  CG1 VAL A 476      23.050  40.030  11.140  1.00  0.00           C
ATOM   2822 1HG1 VAL A 476      22.460  39.220  10.700  1.00  0.00           H
ATOM   2823 2HG1 VAL A 476      23.160  39.880  12.210  1.00  0.00           H
ATOM   2824 3HG1 VAL A 476      22.580  41.000  10.940  1.00  0.00           H
ATOM   2825  CG2 VAL A 476      24.990  39.040  10.020  1.00  0.00           C
ATOM   2826 1HG2 VAL A 476      24.360  38.560   9.280  1.00  0.00           H
ATOM   2827 2HG2 VAL A 476      26.000  39.230   9.670  1.00  0.00           H
ATOM   2828 3HG2 VAL A 476      24.940  38.440  10.930  1.00  0.00           H
ATOM   2829  C   VAL A 476      25.560  41.860   8.720  1.00  0.00           C
ATOM   2830  O   VAL A 476      26.100  41.330   7.730  1.00  0.00           O
ATOM   2831  N   GLY A 477      26.110  42.820   9.430  1.00  0.00           N
ATOM   2832  H   GLY A 477      25.590  43.170  10.220  1.00  0.00           H
ATOM   2833  CA  GLY A 477      27.460  43.290   9.310  1.00  0.00           C
ATOM   2834  HA1 GLY A 477      28.090  42.460   9.590  1.00  0.00           H
ATOM   2835  HA2 GLY A 477      27.640  44.040  10.080  1.00  0.00           H
ATOM   2836  C   GLY A 477      27.790  43.900   7.970  1.00  0.00           C
ATOM   2837  O   GLY A 477      26.890  44.100   7.190  1.00  0.00           O
ATOM   2838  N   THR A 478      29.070  44.080   7.780  1.00  0.00           N
ATOM   2839  H   THR A 478      29.740  43.760   8.460  1.00  0.00           H
ATOM   2840  CA  THR A 478      29.700  44.560   6.490  1.00  0.00           C
ATOM   2841  HA  THR A 478      28.990  45.320   6.160  1.00  0.00           H
ATOM   2842  CB  THR A 478      30.990  45.290   6.760  1.00  0.00           C
ATOM   2843  HB  THR A 478      31.410  45.720   5.850  1.00  0.00           H
ATOM   2844  CG2 THR A 478      30.970  46.410   7.790  1.00  0.00           C
ATOM   2845 1HG2 THR A 478      30.880  46.070   8.820  1.00  0.00           H
ATOM   2846 2HG2 THR A 478      31.950  46.880   7.820  1.00  0.00           H
ATOM   2847 3HG2 THR A 478      30.360  47.300   7.620  1.00  0.00           H
ATOM   2848  OG1 THR A 478      31.990  44.370   7.130  1.00  0.00           O
ATOM   2849  HG1 THR A 478      31.560  43.760   7.740  1.00  0.00           H
ATOM   2850  C   THR A 478      29.830  43.500   5.350  1.00  0.00           C
ATOM   2851  O   THR A 478      30.110  42.330   5.580  1.00  0.00           O
ATOM   2852  N   PRO A 479      29.610  43.880   4.130  1.00  0.00           N
ATOM   2853  CD  PRO A 479      29.330  45.280   3.730  1.00  0.00           C
ATOM   2854  HD1 PRO A 479      30.020  45.980   4.190  1.00  0.00           H
ATOM   2855  HD2 PRO A 479      28.320  45.610   3.990  1.00  0.00           H
ATOM   2856  CG  PRO A 479      29.480  45.230   2.180  1.00  0.00           C
ATOM   2857  HG1 PRO A 479      30.550  45.250   1.980  1.00  0.00           H
ATOM   2858  HG2 PRO A 479      28.780  45.870   1.650  1.00  0.00           H
ATOM   2859  CB  PRO A 479      29.020  43.760   1.850  1.00  0.00           C
ATOM   2860  HB1 PRO A 479      29.340  43.510   0.840  1.00  0.00           H
ATOM   2861  HB2 PRO A 479      27.930  43.730   1.860  1.00  0.00           H
ATOM   2862  CA  PRO A 479      29.530  42.910   2.990  1.00  0.00           C
ATOM   2863  HA  PRO A 479      28.860  42.080   3.220  1.00  0.00           H
ATOM   2864  C   PRO A 479      30.760  42.140   2.570  1.00  0.00           C
ATOM   2865  O   PRO A 479      30.680  41.190   1.810  1.00  0.00           O
ATOM   2866  N   TYR A 480      31.970  42.460   2.980  1.00  0.00           N
ATOM   2867  H   TYR A 480      32.080  43.200   3.670  1.00  0.00           H
ATOM   2868  CA  TYR A 480      33.130  42.080   2.130  1.00  0.00           C
ATOM   2869  HA  TYR A 480      32.850  42.200   1.090  1.00  0.00           H
ATOM   2870  CB  TYR A 480      34.240  43.110   2.360  1.00  0.00           C
ATOM   2871  HB1 TYR A 480      35.170  42.870   1.840  1.00  0.00           H
ATOM   2872  HB2 TYR A 480      34.360  43.050   3.440  1.00  0.00           H
ATOM   2873  CG  TYR A 480      33.890  44.530   2.000  1.00  0.00           C
ATOM   2874  CD1 TYR A 480      33.760  44.850   0.630  1.00  0.00           C
ATOM   2875  HD1 TYR A 480      33.880  44.140  -0.170  1.00  0.00           H
ATOM   2876  CE1 TYR A 480      33.360  46.200   0.240  1.00  0.00           C
ATOM   2877  HE1 TYR A 480      33.370  46.520  -0.790  1.00  0.00           H
ATOM   2878  CZ  TYR A 480      33.400  47.150   1.270  1.00  0.00           C
ATOM   2879  OH  TYR A 480      33.050  48.440   1.050  1.00  0.00           O
ATOM   2880  HH  TYR A 480      33.240  48.670   0.140  1.00  0.00           H
ATOM   2881  CE2 TYR A 480      33.500  46.780   2.630  1.00  0.00           C
ATOM   2882  HE2 TYR A 480      33.460  47.570   3.360  1.00  0.00           H
ATOM   2883  CD2 TYR A 480      33.770  45.470   3.030  1.00  0.00           C
ATOM   2884  HD2 TYR A 480      34.020  45.190   4.040  1.00  0.00           H
ATOM   2885  C   TYR A 480      33.600  40.590   2.230  1.00  0.00           C
ATOM   2886  O   TYR A 480      34.310  40.160   1.300  1.00  0.00           O
ATOM   2887  N   TRP A 481      33.280  39.880   3.320  1.00  0.00           N
ATOM   2888  H   TRP A 481      32.900  40.360   4.120  1.00  0.00           H
ATOM   2889  CA  TRP A 481      33.530  38.450   3.470  1.00  0.00           C
ATOM   2890  HA  TRP A 481      34.090  38.140   2.590  1.00  0.00           H
ATOM   2891  CB  TRP A 481      34.390  38.190   4.750  1.00  0.00           C
ATOM   2892  HB1 TRP A 481      34.690  37.140   4.700  1.00  0.00           H
ATOM   2893  HB2 TRP A 481      33.720  38.360   5.590  1.00  0.00           H
ATOM   2894  CG  TRP A 481      35.690  38.970   4.990  1.00  0.00           C
ATOM   2895  CD1 TRP A 481      36.930  38.460   4.850  1.00  0.00           C
ATOM   2896  HD1 TRP A 481      37.220  37.520   4.400  1.00  0.00           H
ATOM   2897  NE1 TRP A 481      37.880  39.450   5.220  1.00  0.00           N
ATOM   2898  HE1 TRP A 481      38.760  39.130   5.600  1.00  0.00           H
ATOM   2899  CE2 TRP A 481      37.270  40.640   5.520  1.00  0.00           C
ATOM   2900  CZ2 TRP A 481      37.740  41.930   5.900  1.00  0.00           C
ATOM   2901  HZ2 TRP A 481      38.810  42.010   6.000  1.00  0.00           H
ATOM   2902  CH2 TRP A 481      36.760  42.970   6.210  1.00  0.00           C
ATOM   2903  HH2 TRP A 481      37.050  43.970   6.480  1.00  0.00           H
ATOM   2904  CZ3 TRP A 481      35.390  42.690   6.090  1.00  0.00           C
ATOM   2905  HZ3 TRP A 481      34.710  43.480   6.380  1.00  0.00           H
ATOM   2906  CE3 TRP A 481      34.930  41.340   5.740  1.00  0.00           C
ATOM   2907  HE3 TRP A 481      33.890  41.030   5.750  1.00  0.00           H
ATOM   2908  CD2 TRP A 481      35.830  40.290   5.490  1.00  0.00           C
ATOM   2909  C   TRP A 481      32.180  37.720   3.540  1.00  0.00           C
ATOM   2910  O   TRP A 481      32.080  36.530   3.670  1.00  0.00           O
ATOM   2911  N   MET A 482      31.010  38.470   3.520  1.00  0.00           N
ATOM   2912  H   MET A 482      31.110  39.440   3.280  1.00  0.00           H
ATOM   2913  CA  MET A 482      29.710  37.880   3.700  1.00  0.00           C
ATOM   2914  HA  MET A 482      29.710  37.240   4.590  1.00  0.00           H
ATOM   2915  CB  MET A 482      28.690  39.030   3.760  1.00  0.00           C
ATOM   2916  HB1 MET A 482      27.720  38.680   3.400  1.00  0.00           H
ATOM   2917  HB2 MET A 482      28.990  39.830   3.090  1.00  0.00           H
ATOM   2918  CG  MET A 482      28.600  39.670   5.110  1.00  0.00           C
ATOM   2919  HG1 MET A 482      27.940  40.540   5.110  1.00  0.00           H
ATOM   2920  HG2 MET A 482      29.580  40.050   5.420  1.00  0.00           H
ATOM   2921  SD  MET A 482      27.990  38.640   6.460  1.00  0.00           S
ATOM   2922  CE  MET A 482      28.550  39.570   7.930  1.00  0.00           C
ATOM   2923  HE1 MET A 482      29.570  39.360   8.260  1.00  0.00           H
ATOM   2924  HE2 MET A 482      28.470  40.610   7.630  1.00  0.00           H
ATOM   2925  HE3 MET A 482      27.940  39.490   8.830  1.00  0.00           H
ATOM   2926  C   MET A 482      29.330  36.990   2.520  1.00  0.00           C
ATOM   2927  O   MET A 482      29.860  37.100   1.330  1.00  0.00           O
ATOM   2928  N   ALA A 483      28.450  36.040   2.780  1.00  0.00           N
ATOM   2929  H   ALA A 483      28.230  35.830   3.740  1.00  0.00           H
ATOM   2930  CA  ALA A 483      28.140  35.120   1.720  1.00  0.00           C
ATOM   2931  HA  ALA A 483      29.030  34.920   1.120  1.00  0.00           H
ATOM   2932  CB  ALA A 483      27.610  33.840   2.370  1.00  0.00           C
ATOM   2933  HB1 ALA A 483      28.350  33.430   3.050  1.00  0.00           H
ATOM   2934  HB2 ALA A 483      26.820  34.170   3.040  1.00  0.00           H
ATOM   2935  HB3 ALA A 483      27.270  33.010   1.760  1.00  0.00           H
ATOM   2936  C   ALA A 483      27.100  35.690   0.690  1.00  0.00           C
ATOM   2937  O   ALA A 483      26.230  36.470   1.130  1.00  0.00           O
ATOM   2938  N   PRO A 484      27.140  35.410  -0.610  1.00  0.00           N
ATOM   2939  CD  PRO A 484      28.160  34.590  -1.230  1.00  0.00           C
ATOM   2940  HD1 PRO A 484      28.010  33.520  -1.100  1.00  0.00           H
ATOM   2941  HD2 PRO A 484      29.190  34.800  -0.950  1.00  0.00           H
ATOM   2942  CG  PRO A 484      28.100  34.870  -2.670  1.00  0.00           C
ATOM   2943  HG1 PRO A 484      28.410  33.920  -3.110  1.00  0.00           H
ATOM   2944  HG2 PRO A 484      28.790  35.670  -2.920  1.00  0.00           H
ATOM   2945  CB  PRO A 484      26.680  35.320  -3.020  1.00  0.00           C
ATOM   2946  HB1 PRO A 484      26.070  34.470  -3.330  1.00  0.00           H
ATOM   2947  HB2 PRO A 484      26.630  36.070  -3.810  1.00  0.00           H
ATOM   2948  CA  PRO A 484      26.210  35.840  -1.690  1.00  0.00           C
ATOM   2949  HA  PRO A 484      26.340  36.920  -1.680  1.00  0.00           H
ATOM   2950  C   PRO A 484      24.720  35.580  -1.440  1.00  0.00           C
ATOM   2951  O   PRO A 484      23.880  36.440  -1.680  1.00  0.00           O
ATOM   2952  N   GLU A 485      24.330  34.370  -0.990  1.00  0.00           N
ATOM   2953  H   GLU A 485      25.010  33.630  -0.960  1.00  0.00           H
ATOM   2954  CA  GLU A 485      22.990  34.070  -0.500  1.00  0.00           C
ATOM   2955  HA  GLU A 485      22.290  34.320  -1.290  1.00  0.00           H
ATOM   2956  CB  GLU A 485      22.820  32.570  -0.150  1.00  0.00           C
ATOM   2957  HB1 GLU A 485      23.080  31.930  -0.990  1.00  0.00           H
ATOM   2958  HB2 GLU A 485      21.810  32.380   0.190  1.00  0.00           H
ATOM   2959  CG  GLU A 485      23.670  32.080   1.080  1.00  0.00           C
ATOM   2960  HG1 GLU A 485      23.030  31.300   1.500  1.00  0.00           H
ATOM   2961  HG2 GLU A 485      23.690  32.810   1.890  1.00  0.00           H
ATOM   2962  CD  GLU A 485      25.040  31.400   0.830  1.00  0.00           C
ATOM   2963  OE1 GLU A 485      25.610  31.610  -0.250  1.00  0.00           O
ATOM   2964  OE2 GLU A 485      25.440  30.630   1.700  1.00  0.00           O
ATOM   2965  C   GLU A 485      22.500  35.090   0.590  1.00  0.00           C
ATOM   2966  O   GLU A 485      21.330  35.460   0.690  1.00  0.00           O
ATOM   2967  N   LEU A 486      23.440  35.390   1.560  1.00  0.00           N
ATOM   2968  H   LEU A 486      24.360  35.150   1.200  1.00  0.00           H
ATOM   2969  CA  LEU A 486      23.330  36.260   2.720  1.00  0.00           C
ATOM   2970  HA  LEU A 486      22.420  35.940   3.230  1.00  0.00           H
ATOM   2971  CB  LEU A 486      24.440  35.910   3.700  1.00  0.00           C
ATOM   2972  HB1 LEU A 486      25.420  36.300   3.420  1.00  0.00           H
ATOM   2973  HB2 LEU A 486      24.540  34.830   3.750  1.00  0.00           H
ATOM   2974  CG  LEU A 486      24.130  36.390   5.160  1.00  0.00           C
ATOM   2975  HG  LEU A 486      23.100  36.090   5.330  1.00  0.00           H
ATOM   2976  CD1 LEU A 486      25.000  35.640   6.160  1.00  0.00           C
ATOM   2977 1HD1 LEU A 486      24.740  35.970   7.170  1.00  0.00           H
ATOM   2978 2HD1 LEU A 486      24.700  34.600   6.020  1.00  0.00           H
ATOM   2979 3HD1 LEU A 486      26.070  35.840   6.150  1.00  0.00           H
ATOM   2980  CD2 LEU A 486      24.400  37.850   5.440  1.00  0.00           C
ATOM   2981 1HD2 LEU A 486      23.800  38.510   4.810  1.00  0.00           H
ATOM   2982 2HD2 LEU A 486      24.140  38.030   6.480  1.00  0.00           H
ATOM   2983 3HD2 LEU A 486      25.430  38.180   5.290  1.00  0.00           H
ATOM   2984  C   LEU A 486      23.190  37.800   2.210  1.00  0.00           C
ATOM   2985  O   LEU A 486      22.380  38.550   2.730  1.00  0.00           O
ATOM   2986  N   ILE A 487      23.850  38.200   1.100  1.00  0.00           N
ATOM   2987  H   ILE A 487      24.490  37.550   0.680  1.00  0.00           H
ATOM   2988  CA  ILE A 487      23.550  39.500   0.440  1.00  0.00           C
ATOM   2989  HA  ILE A 487      23.400  40.270   1.190  1.00  0.00           H
ATOM   2990  CB  ILE A 487      24.750  39.950  -0.370  1.00  0.00           C
ATOM   2991  HB  ILE A 487      24.930  39.160  -1.100  1.00  0.00           H
ATOM   2992  CG2 ILE A 487      24.430  41.340  -1.030  1.00  0.00           C
ATOM   2993 1HG2 ILE A 487      24.010  42.040  -0.310  1.00  0.00           H
ATOM   2994 2HG2 ILE A 487      25.310  41.830  -1.450  1.00  0.00           H
ATOM   2995 3HG2 ILE A 487      23.790  41.270  -1.900  1.00  0.00           H
ATOM   2996  CG1 ILE A 487      26.080  40.060   0.480  1.00  0.00           C
ATOM   2997 1HG1 ILE A 487      26.830  40.370  -0.260  1.00  0.00           H
ATOM   2998 2HG1 ILE A 487      26.250  39.070   0.890  1.00  0.00           H
ATOM   2999  CD  ILE A 487      26.100  41.050   1.680  1.00  0.00           C
ATOM   3000  HD1 ILE A 487      25.340  40.630   2.340  1.00  0.00           H
ATOM   3001  HD2 ILE A 487      27.050  41.130   2.220  1.00  0.00           H
ATOM   3002  HD3 ILE A 487      25.850  42.040   1.290  1.00  0.00           H
ATOM   3003  C   ILE A 487      22.220  39.450  -0.400  1.00  0.00           C
ATOM   3004  O   ILE A 487      21.640  40.530  -0.620  1.00  0.00           O
ATOM   3005  N   SER A 488      21.760  38.260  -0.780  1.00  0.00           N
ATOM   3006  H   SER A 488      22.360  37.450  -0.720  1.00  0.00           H
ATOM   3007  CA  SER A 488      20.550  38.160  -1.560  1.00  0.00           C
ATOM   3008  HA  SER A 488      20.470  39.060  -2.180  1.00  0.00           H
ATOM   3009  CB  SER A 488      20.610  37.070  -2.590  1.00  0.00           C
ATOM   3010  HB1 SER A 488      19.690  37.070  -3.190  1.00  0.00           H
ATOM   3011  HB2 SER A 488      20.750  36.140  -2.050  1.00  0.00           H
ATOM   3012  OG  SER A 488      21.720  37.200  -3.440  1.00  0.00           O
ATOM   3013  HG  SER A 488      22.380  37.130  -2.750  1.00  0.00           H
ATOM   3014  C   SER A 488      19.270  38.030  -0.690  1.00  0.00           C
ATOM   3015  O   SER A 488      18.180  38.050  -1.200  1.00  0.00           O
ATOM   3016  N   ARG A 489      19.530  37.830   0.630  1.00  0.00           N
ATOM   3017  H   ARG A 489      20.480  37.520   0.800  1.00  0.00           H
ATOM   3018  CA  ARG A 489      18.570  37.450   1.720  1.00  0.00           C
ATOM   3019  HA  ARG A 489      19.280  37.290   2.530  1.00  0.00           H
ATOM   3020  CB  ARG A 489      17.750  38.710   2.140  1.00  0.00           C
ATOM   3021  HB1 ARG A 489      16.870  38.430   2.710  1.00  0.00           H
ATOM   3022  HB2 ARG A 489      17.430  39.140   1.190  1.00  0.00           H
ATOM   3023  CG  ARG A 489      18.560  39.840   2.850  1.00  0.00           C
ATOM   3024  HG1 ARG A 489      19.270  40.320   2.180  1.00  0.00           H
ATOM   3025  HG2 ARG A 489      19.020  39.420   3.750  1.00  0.00           H
ATOM   3026  CD  ARG A 489      17.550  40.820   3.330  1.00  0.00           C
ATOM   3027  HD1 ARG A 489      16.840  40.380   4.030  1.00  0.00           H
ATOM   3028  HD2 ARG A 489      16.860  41.040   2.510  1.00  0.00           H
ATOM   3029  NE  ARG A 489      18.160  42.070   3.900  1.00  0.00           N
ATOM   3030  HE  ARG A 489      18.200  42.050   4.910  1.00  0.00           H
ATOM   3031  CZ  ARG A 489      18.810  43.050   3.350  1.00  0.00           C
ATOM   3032  NH1 ARG A 489      19.190  44.100   4.010  1.00  0.00           N
ATOM   3033 1HH1 ARG A 489      18.810  44.220   4.930  1.00  0.00           H
ATOM   3034 2HH1 ARG A 489      19.720  44.810   3.520  1.00  0.00           H
ATOM   3035  NH2 ARG A 489      18.980  43.020   1.990  1.00  0.00           N
ATOM   3036 1HH2 ARG A 489      18.470  42.420   1.350  1.00  0.00           H
ATOM   3037 2HH2 ARG A 489      19.580  43.760   1.660  1.00  0.00           H
ATOM   3038  C   ARG A 489      17.780  36.200   1.410  1.00  0.00           C
ATOM   3039  O   ARG A 489      16.600  36.120   1.530  1.00  0.00           O
ATOM   3040  N   LEU A 490      18.480  35.170   0.980  1.00  0.00           N
ATOM   3041  H   LEU A 490      19.480  35.190   1.080  1.00  0.00           H
ATOM   3042  CA  LEU A 490      17.920  33.860   0.700  1.00  0.00           C
ATOM   3043  HA  LEU A 490      16.860  33.990   0.500  1.00  0.00           H
ATOM   3044  CB  LEU A 490      18.710  33.170  -0.480  1.00  0.00           C
ATOM   3045  HB1 LEU A 490      18.400  32.160  -0.750  1.00  0.00           H
ATOM   3046  HB2 LEU A 490      19.760  33.120  -0.200  1.00  0.00           H
ATOM   3047  CG  LEU A 490      18.590  34.090  -1.760  1.00  0.00           C
ATOM   3048  HG  LEU A 490      18.990  35.080  -1.550  1.00  0.00           H
ATOM   3049  CD1 LEU A 490      19.530  33.410  -2.740  1.00  0.00           C
ATOM   3050 1HD1 LEU A 490      19.170  32.410  -3.000  1.00  0.00           H
ATOM   3051 2HD1 LEU A 490      19.650  33.960  -3.680  1.00  0.00           H
ATOM   3052 3HD1 LEU A 490      20.540  33.180  -2.390  1.00  0.00           H
ATOM   3053  CD2 LEU A 490      17.280  34.220  -2.410  1.00  0.00           C
ATOM   3054 1HD2 LEU A 490      16.480  34.240  -1.670  1.00  0.00           H
ATOM   3055 2HD2 LEU A 490      17.320  35.100  -3.050  1.00  0.00           H
ATOM   3056 3HD2 LEU A 490      17.100  33.390  -3.100  1.00  0.00           H
ATOM   3057  C   LEU A 490      18.100  33.070   2.000  1.00  0.00           C
ATOM   3058  O   LEU A 490      18.850  33.450   2.900  1.00  0.00           O
ATOM   3059  N   PRO A 491      17.370  31.910   2.130  1.00  0.00           N
ATOM   3060  CD  PRO A 491      16.410  31.440   1.180  1.00  0.00           C
ATOM   3061  HD1 PRO A 491      16.720  31.540   0.140  1.00  0.00           H
ATOM   3062  HD2 PRO A 491      15.520  32.050   1.360  1.00  0.00           H
ATOM   3063  CG  PRO A 491      16.120  29.990   1.590  1.00  0.00           C
ATOM   3064  HG1 PRO A 491      16.790  29.280   1.110  1.00  0.00           H
ATOM   3065  HG2 PRO A 491      15.100  29.710   1.320  1.00  0.00           H
ATOM   3066  CB  PRO A 491      16.450  29.930   3.060  1.00  0.00           C
ATOM   3067  HB1 PRO A 491      16.750  28.940   3.420  1.00  0.00           H
ATOM   3068  HB2 PRO A 491      15.620  30.420   3.570  1.00  0.00           H
ATOM   3069  CA  PRO A 491      17.570  30.990   3.230  1.00  0.00           C
ATOM   3070  HA  PRO A 491      17.480  31.470   4.210  1.00  0.00           H
ATOM   3071  C   PRO A 491      18.980  30.380   3.350  1.00  0.00           C
ATOM   3072  O   PRO A 491      19.510  29.750   2.380  1.00  0.00           O
ATOM   3073  N   TYR A 492      19.580  30.350   4.510  1.00  0.00           N
ATOM   3074  H   TYR A 492      19.030  30.840   5.200  1.00  0.00           H
ATOM   3075  CA  TYR A 492      20.930  29.880   4.760  1.00  0.00           C
ATOM   3076  HA  TYR A 492      21.200  29.130   4.020  1.00  0.00           H
ATOM   3077  CB  TYR A 492      21.940  31.080   4.590  1.00  0.00           C
ATOM   3078  HB1 TYR A 492      21.770  31.590   3.650  1.00  0.00           H
ATOM   3079  HB2 TYR A 492      22.980  30.750   4.600  1.00  0.00           H
ATOM   3080  CG  TYR A 492      21.890  32.100   5.730  1.00  0.00           C
ATOM   3081  CD1 TYR A 492      22.570  31.990   6.920  1.00  0.00           C
ATOM   3082  HD1 TYR A 492      23.110  31.080   7.100  1.00  0.00           H
ATOM   3083  CE1 TYR A 492      22.530  33.000   7.850  1.00  0.00           C
ATOM   3084  HE1 TYR A 492      23.030  32.850   8.790  1.00  0.00           H
ATOM   3085  CZ  TYR A 492      21.880  34.210   7.530  1.00  0.00           C
ATOM   3086  OH  TYR A 492      21.970  35.350   8.260  1.00  0.00           O
ATOM   3087  HH  TYR A 492      21.560  36.020   7.700  1.00  0.00           H
ATOM   3088  CE2 TYR A 492      21.170  34.320   6.350  1.00  0.00           C
ATOM   3089  HE2 TYR A 492      20.630  35.230   6.100  1.00  0.00           H
ATOM   3090  CD2 TYR A 492      21.120  33.240   5.450  1.00  0.00           C
ATOM   3091  HD2 TYR A 492      20.620  33.320   4.490  1.00  0.00           H
ATOM   3092  C   TYR A 492      21.150  29.170   6.100  1.00  0.00           C
ATOM   3093  O   TYR A 492      20.210  29.170   6.920  1.00  0.00           O
ATOM   3094  N   GLY A 493      22.330  28.560   6.310  1.00  0.00           N
ATOM   3095  H   GLY A 493      23.020  28.640   5.570  1.00  0.00           H
ATOM   3096  CA  GLY A 493      22.710  27.730   7.430  1.00  0.00           C
ATOM   3097  HA1 GLY A 493      22.360  26.720   7.210  1.00  0.00           H
ATOM   3098  HA2 GLY A 493      22.190  28.090   8.310  1.00  0.00           H
ATOM   3099  C   GLY A 493      24.200  27.750   7.630  1.00  0.00           C
ATOM   3100  O   GLY A 493      24.860  28.780   7.470  1.00  0.00           O
ATOM   3101  N   PRO A 494      24.800  26.680   8.130  1.00  0.00           N
ATOM   3102  CD  PRO A 494      24.120  25.520   8.740  1.00  0.00           C
ATOM   3103  HD1 PRO A 494      23.690  24.930   7.930  1.00  0.00           H
ATOM   3104  HD2 PRO A 494      23.320  25.910   9.360  1.00  0.00           H
ATOM   3105  CG  PRO A 494      25.150  24.730   9.530  1.00  0.00           C
ATOM   3106  HG1 PRO A 494      24.930  23.670   9.590  1.00  0.00           H
ATOM   3107  HG2 PRO A 494      25.240  25.020  10.580  1.00  0.00           H
ATOM   3108  CB  PRO A 494      26.400  25.040   8.710  1.00  0.00           C
ATOM   3109  HB1 PRO A 494      26.340  24.420   7.820  1.00  0.00           H
ATOM   3110  HB2 PRO A 494      27.270  24.860   9.340  1.00  0.00           H
ATOM   3111  CA  PRO A 494      26.250  26.570   8.440  1.00  0.00           C
ATOM   3112  HA  PRO A 494      26.470  27.040   9.400  1.00  0.00           H
ATOM   3113  C   PRO A 494      27.220  26.980   7.300  1.00  0.00           C
ATOM   3114  O   PRO A 494      28.350  27.490   7.390  1.00  0.00           O
ATOM   3115  N   GLU A 495      26.770  26.970   6.030  1.00  0.00           N
ATOM   3116  H   GLU A 495      25.950  26.400   5.870  1.00  0.00           H
ATOM   3117  CA  GLU A 495      27.590  27.170   4.840  1.00  0.00           C
ATOM   3118  HA  GLU A 495      28.460  26.520   4.930  1.00  0.00           H
ATOM   3119  CB  GLU A 495      26.740  26.750   3.590  1.00  0.00           C
ATOM   3120  HB1 GLU A 495      27.300  27.100   2.720  1.00  0.00           H
ATOM   3121  HB2 GLU A 495      25.840  27.360   3.570  1.00  0.00           H
ATOM   3122  CG  GLU A 495      26.360  25.300   3.290  1.00  0.00           C
ATOM   3123  HG1 GLU A 495      27.180  24.730   2.850  1.00  0.00           H
ATOM   3124  HG2 GLU A 495      25.720  25.260   2.410  1.00  0.00           H
ATOM   3125  CD  GLU A 495      25.870  24.530   4.450  1.00  0.00           C
ATOM   3126  OE1 GLU A 495      26.470  23.470   4.850  1.00  0.00           O
ATOM   3127  OE2 GLU A 495      24.880  24.980   5.110  1.00  0.00           O
ATOM   3128  C   GLU A 495      28.120  28.560   4.620  1.00  0.00           C
ATOM   3129  O   GLU A 495      29.030  28.750   3.840  1.00  0.00           O
ATOM   3130  N   VAL A 496      27.560  29.570   5.230  1.00  0.00           N
ATOM   3131  H   VAL A 496      26.790  29.470   5.880  1.00  0.00           H
ATOM   3132  CA  VAL A 496      27.950  31.020   5.100  1.00  0.00           C
ATOM   3133  HA  VAL A 496      27.910  31.210   4.030  1.00  0.00           H
ATOM   3134  CB  VAL A 496      26.940  32.080   5.830  1.00  0.00           C
ATOM   3135  HB  VAL A 496      27.290  33.080   5.580  1.00  0.00           H
ATOM   3136  CG1 VAL A 496      25.660  31.820   5.050  1.00  0.00           C
ATOM   3137 1HG1 VAL A 496      25.380  30.770   5.000  1.00  0.00           H
ATOM   3138 2HG1 VAL A 496      24.880  32.480   5.430  1.00  0.00           H
ATOM   3139 3HG1 VAL A 496      25.890  32.120   4.030  1.00  0.00           H
ATOM   3140  CG2 VAL A 496      26.730  31.930   7.310  1.00  0.00           C
ATOM   3141 1HG2 VAL A 496      26.640  30.910   7.670  1.00  0.00           H
ATOM   3142 2HG2 VAL A 496      27.640  32.300   7.780  1.00  0.00           H
ATOM   3143 3HG2 VAL A 496      25.890  32.520   7.680  1.00  0.00           H
ATOM   3144  C   VAL A 496      29.440  31.250   5.490  1.00  0.00           C
ATOM   3145  O   VAL A 496      30.220  31.860   4.800  1.00  0.00           O
ATOM   3146  N   ASP A 497      29.850  30.640   6.590  1.00  0.00           N
ATOM   3147  H   ASP A 497      29.180  30.190   7.190  1.00  0.00           H
ATOM   3148  CA  ASP A 497      31.190  30.600   7.220  1.00  0.00           C
ATOM   3149  HA  ASP A 497      31.550  31.600   7.440  1.00  0.00           H
ATOM   3150  CB  ASP A 497      31.120  29.820   8.560  1.00  0.00           C
ATOM   3151  HB1 ASP A 497      32.100  29.700   9.020  1.00  0.00           H
ATOM   3152  HB2 ASP A 497      30.820  28.790   8.390  1.00  0.00           H
ATOM   3153  CG  ASP A 497      30.220  30.320   9.670  1.00  0.00           C
ATOM   3154  OD1 ASP A 497      29.540  31.330   9.570  1.00  0.00           O
ATOM   3155  OD2 ASP A 497      30.350  29.760  10.800  1.00  0.00           O
ATOM   3156  C   ASP A 497      32.240  29.920   6.350  1.00  0.00           C
ATOM   3157  O   ASP A 497      33.450  30.320   6.370  1.00  0.00           O
ATOM   3158  N   ILE A 498      31.880  28.930   5.520  1.00  0.00           N
ATOM   3159  H   ILE A 498      30.900  28.800   5.290  1.00  0.00           H
ATOM   3160  CA  ILE A 498      32.740  28.280   4.540  1.00  0.00           C
ATOM   3161  HA  ILE A 498      33.740  28.090   4.940  1.00  0.00           H
ATOM   3162  CB  ILE A 498      32.100  26.980   4.110  1.00  0.00           C
ATOM   3163  HB  ILE A 498      31.230  27.100   3.470  1.00  0.00           H
ATOM   3164  CG2 ILE A 498      33.030  26.230   3.180  1.00  0.00           C
ATOM   3165 1HG2 ILE A 498      33.080  26.860   2.300  1.00  0.00           H
ATOM   3166 2HG2 ILE A 498      34.010  26.180   3.650  1.00  0.00           H
ATOM   3167 3HG2 ILE A 498      32.600  25.240   3.010  1.00  0.00           H
ATOM   3168  CG1 ILE A 498      31.620  26.120   5.310  1.00  0.00           C
ATOM   3169 1HG1 ILE A 498      31.170  25.180   4.980  1.00  0.00           H
ATOM   3170 2HG1 ILE A 498      30.800  26.600   5.830  1.00  0.00           H
ATOM   3171  CD  ILE A 498      32.810  25.710   6.300  1.00  0.00           C
ATOM   3172  HD1 ILE A 498      33.500  25.010   5.840  1.00  0.00           H
ATOM   3173  HD2 ILE A 498      33.290  26.640   6.630  1.00  0.00           H
ATOM   3174  HD3 ILE A 498      32.410  25.250   7.200  1.00  0.00           H
ATOM   3175  C   ILE A 498      33.210  29.240   3.460  1.00  0.00           C
ATOM   3176  O   ILE A 498      34.430  29.310   3.050  1.00  0.00           O
ATOM   3177  N   TRP A 499      32.390  30.250   3.120  1.00  0.00           N
ATOM   3178  H   TRP A 499      31.410  30.180   3.370  1.00  0.00           H
ATOM   3179  CA  TRP A 499      32.580  31.410   2.220  1.00  0.00           C
ATOM   3180  HA  TRP A 499      33.280  30.990   1.500  1.00  0.00           H
ATOM   3181  CB  TRP A 499      31.270  31.880   1.530  1.00  0.00           C
ATOM   3182  HB1 TRP A 499      30.530  32.170   2.270  1.00  0.00           H
ATOM   3183  HB2 TRP A 499      30.890  31.050   0.940  1.00  0.00           H
ATOM   3184  CG  TRP A 499      31.370  32.970   0.550  1.00  0.00           C
ATOM   3185  CD1 TRP A 499      31.720  34.250   0.830  1.00  0.00           C
ATOM   3186  HD1 TRP A 499      31.900  34.580   1.850  1.00  0.00           H
ATOM   3187  NE1 TRP A 499      31.960  34.980  -0.300  1.00  0.00           N
ATOM   3188  HE1 TRP A 499      32.290  35.930  -0.300  1.00  0.00           H
ATOM   3189  CE2 TRP A 499      31.820  34.230  -1.430  1.00  0.00           C
ATOM   3190  CZ2 TRP A 499      31.920  34.520  -2.800  1.00  0.00           C
ATOM   3191  HZ2 TRP A 499      32.370  35.410  -3.230  1.00  0.00           H
ATOM   3192  CH2 TRP A 499      31.550  33.520  -3.740  1.00  0.00           C
ATOM   3193  HH2 TRP A 499      31.580  33.700  -4.800  1.00  0.00           H
ATOM   3194  CZ3 TRP A 499      31.160  32.270  -3.240  1.00  0.00           C
ATOM   3195  HZ3 TRP A 499      31.020  31.480  -3.960  1.00  0.00           H
ATOM   3196  CE3 TRP A 499      31.020  31.980  -1.880  1.00  0.00           C
ATOM   3197  HE3 TRP A 499      30.730  30.990  -1.550  1.00  0.00           H
ATOM   3198  CD2 TRP A 499      31.360  32.940  -0.910  1.00  0.00           C
ATOM   3199  C   TRP A 499      33.420  32.520   2.820  1.00  0.00           C
ATOM   3200  O   TRP A 499      34.440  32.910   2.250  1.00  0.00           O
ATOM   3201  N   SER A 500      33.130  32.980   4.060  1.00  0.00           N
ATOM   3202  H   SER A 500      32.430  32.450   4.550  1.00  0.00           H
ATOM   3203  CA  SER A 500      33.810  34.130   4.790  1.00  0.00           C
ATOM   3204  HA  SER A 500      33.820  35.010   4.150  1.00  0.00           H
ATOM   3205  CB  SER A 500      33.090  34.370   6.120  1.00  0.00           C
ATOM   3206  HB1 SER A 500      33.680  35.150   6.610  1.00  0.00           H
ATOM   3207  HB2 SER A 500      33.130  33.420   6.660  1.00  0.00           H
ATOM   3208  OG  SER A 500      31.750  34.800   5.730  1.00  0.00           O
ATOM   3209  HG  SER A 500      31.900  35.230   4.890  1.00  0.00           H
ATOM   3210  C   SER A 500      35.280  33.600   4.980  1.00  0.00           C
ATOM   3211  O   SER A 500      36.160  34.420   4.780  1.00  0.00           O
ATOM   3212  N   LEU A 501      35.510  32.310   5.350  1.00  0.00           N
ATOM   3213  H   LEU A 501      34.680  31.760   5.480  1.00  0.00           H
ATOM   3214  CA  LEU A 501      36.910  31.770   5.630  1.00  0.00           C
ATOM   3215  HA  LEU A 501      37.540  32.460   6.200  1.00  0.00           H
ATOM   3216  CB  LEU A 501      36.900  30.420   6.370  1.00  0.00           C
ATOM   3217  HB1 LEU A 501      36.200  29.820   5.800  1.00  0.00           H
ATOM   3218  HB2 LEU A 501      36.530  30.620   7.380  1.00  0.00           H
ATOM   3219  CG  LEU A 501      38.230  29.600   6.480  1.00  0.00           C
ATOM   3220  HG  LEU A 501      38.690  29.520   5.490  1.00  0.00           H
ATOM   3221  CD1 LEU A 501      39.160  30.260   7.460  1.00  0.00           C
ATOM   3222 1HD1 LEU A 501      40.150  29.810   7.390  1.00  0.00           H
ATOM   3223 2HD1 LEU A 501      39.350  31.280   7.140  1.00  0.00           H
ATOM   3224 3HD1 LEU A 501      38.870  30.270   8.510  1.00  0.00           H
ATOM   3225  CD2 LEU A 501      37.930  28.160   6.960  1.00  0.00           C
ATOM   3226 1HD2 LEU A 501      37.240  27.700   6.250  1.00  0.00           H
ATOM   3227 2HD2 LEU A 501      38.800  27.500   7.000  1.00  0.00           H
ATOM   3228 3HD2 LEU A 501      37.530  28.170   7.970  1.00  0.00           H
ATOM   3229  C   LEU A 501      37.680  31.690   4.270  1.00  0.00           C
ATOM   3230  O   LEU A 501      38.880  32.050   4.190  1.00  0.00           O
ATOM   3231  N   GLY A 502      37.000  31.380   3.170  1.00  0.00           N
ATOM   3232  H   GLY A 502      36.030  31.260   3.400  1.00  0.00           H
ATOM   3233  CA  GLY A 502      37.460  31.480   1.780  1.00  0.00           C
ATOM   3234  HA1 GLY A 502      36.700  31.250   1.040  1.00  0.00           H
ATOM   3235  HA2 GLY A 502      38.290  30.790   1.660  1.00  0.00           H
ATOM   3236  C   GLY A 502      37.890  32.900   1.420  1.00  0.00           C
ATOM   3237  O   GLY A 502      39.020  33.100   0.900  1.00  0.00           O
ATOM   3238  N   ILE A 503      37.120  33.890   1.830  1.00  0.00           N
ATOM   3239  H   ILE A 503      36.250  33.620   2.260  1.00  0.00           H
ATOM   3240  CA  ILE A 503      37.550  35.280   1.700  1.00  0.00           C
ATOM   3241  HA  ILE A 503      37.950  35.410   0.690  1.00  0.00           H
ATOM   3242  CB  ILE A 503      36.310  36.290   1.900  1.00  0.00           C
ATOM   3243  HB  ILE A 503      35.880  36.170   2.890  1.00  0.00           H
ATOM   3244  CG2 ILE A 503      36.820  37.740   1.790  1.00  0.00           C
ATOM   3245 1HG2 ILE A 503      37.730  37.930   2.360  1.00  0.00           H
ATOM   3246 2HG2 ILE A 503      37.050  38.060   0.770  1.00  0.00           H
ATOM   3247 3HG2 ILE A 503      36.110  38.460   2.180  1.00  0.00           H
ATOM   3248  CG1 ILE A 503      35.160  36.040   0.910  1.00  0.00           C
ATOM   3249 1HG1 ILE A 503      34.190  36.500   1.130  1.00  0.00           H
ATOM   3250 2HG1 ILE A 503      35.010  34.960   0.900  1.00  0.00           H
ATOM   3251  CD  ILE A 503      35.410  36.380  -0.560  1.00  0.00           C
ATOM   3252  HD1 ILE A 503      34.570  36.200  -1.240  1.00  0.00           H
ATOM   3253  HD2 ILE A 503      35.650  37.430  -0.730  1.00  0.00           H
ATOM   3254  HD3 ILE A 503      36.270  35.850  -0.960  1.00  0.00           H
ATOM   3255  C   ILE A 503      38.780  35.600   2.610  1.00  0.00           C
ATOM   3256  O   ILE A 503      39.710  36.260   2.170  1.00  0.00           O
ATOM   3257  N   MET A 504      38.790  35.010   3.800  1.00  0.00           N
ATOM   3258  H   MET A 504      38.030  34.470   4.190  1.00  0.00           H
ATOM   3259  CA  MET A 504      39.980  35.240   4.640  1.00  0.00           C
ATOM   3260  HA  MET A 504      40.030  36.330   4.720  1.00  0.00           H
ATOM   3261  CB  MET A 504      39.720  34.760   6.060  1.00  0.00           C
ATOM   3262  HB1 MET A 504      39.670  33.670   6.090  1.00  0.00           H
ATOM   3263  HB2 MET A 504      38.770  35.190   6.360  1.00  0.00           H
ATOM   3264  CG  MET A 504      40.830  35.230   7.040  1.00  0.00           C
ATOM   3265  HG1 MET A 504      40.700  36.300   7.190  1.00  0.00           H
ATOM   3266  HG2 MET A 504      41.860  34.960   6.810  1.00  0.00           H
ATOM   3267  SD  MET A 504      40.490  34.630   8.710  1.00  0.00           S
ATOM   3268  CE  MET A 504      41.210  33.020   8.650  1.00  0.00           C
ATOM   3269  HE1 MET A 504      40.660  32.180   9.080  1.00  0.00           H
ATOM   3270  HE2 MET A 504      41.260  32.710   7.600  1.00  0.00           H
ATOM   3271  HE3 MET A 504      42.220  33.180   9.010  1.00  0.00           H
ATOM   3272  C   MET A 504      41.320  34.720   4.070  1.00  0.00           C
ATOM   3273  O   MET A 504      42.370  35.260   4.300  1.00  0.00           O
ATOM   3274  N   VAL A 505      41.260  33.700   3.170  1.00  0.00           N
ATOM   3275  H   VAL A 505      40.400  33.180   3.100  1.00  0.00           H
ATOM   3276  CA  VAL A 505      42.440  33.170   2.430  1.00  0.00           C
ATOM   3277  HA  VAL A 505      43.240  33.130   3.180  1.00  0.00           H
ATOM   3278  CB  VAL A 505      42.210  31.690   1.890  1.00  0.00           C
ATOM   3279  HB  VAL A 505      41.340  31.620   1.240  1.00  0.00           H
ATOM   3280  CG1 VAL A 505      43.460  31.060   1.320  1.00  0.00           C
ATOM   3281 1HG1 VAL A 505      43.700  31.610   0.410  1.00  0.00           H
ATOM   3282 2HG1 VAL A 505      44.260  31.270   2.030  1.00  0.00           H
ATOM   3283 3HG1 VAL A 505      43.350  29.980   1.200  1.00  0.00           H
ATOM   3284  CG2 VAL A 505      41.950  30.740   3.100  1.00  0.00           C
ATOM   3285 1HG2 VAL A 505      41.190  31.150   3.760  1.00  0.00           H
ATOM   3286 2HG2 VAL A 505      41.540  29.800   2.740  1.00  0.00           H
ATOM   3287 3HG2 VAL A 505      42.790  30.680   3.800  1.00  0.00           H
ATOM   3288  C   VAL A 505      42.920  34.080   1.330  1.00  0.00           C
ATOM   3289  O   VAL A 505      44.100  34.270   1.170  1.00  0.00           O
ATOM   3290  N   ILE A 506      42.060  34.870   0.670  1.00  0.00           N
ATOM   3291  H   ILE A 506      41.090  34.780   0.910  1.00  0.00           H
ATOM   3292  CA  ILE A 506      42.350  35.980  -0.150  1.00  0.00           C
ATOM   3293  HA  ILE A 506      42.960  35.730  -1.010  1.00  0.00           H
ATOM   3294  CB  ILE A 506      41.070  36.580  -0.800  1.00  0.00           C
ATOM   3295  HB  ILE A 506      40.570  37.100   0.020  1.00  0.00           H
ATOM   3296  CG2 ILE A 506      41.500  37.600  -1.860  1.00  0.00           C
ATOM   3297 1HG2 ILE A 506      40.640  38.070  -2.330  1.00  0.00           H
ATOM   3298 2HG2 ILE A 506      41.910  38.390  -1.230  1.00  0.00           H
ATOM   3299 3HG2 ILE A 506      42.230  37.160  -2.550  1.00  0.00           H
ATOM   3300  CG1 ILE A 506      39.980  35.650  -1.440  1.00  0.00           C
ATOM   3301 1HG1 ILE A 506      39.760  34.870  -0.710  1.00  0.00           H
ATOM   3302 2HG1 ILE A 506      40.390  35.140  -2.310  1.00  0.00           H
ATOM   3303  CD  ILE A 506      38.720  36.300  -1.970  1.00  0.00           C
ATOM   3304  HD1 ILE A 506      38.220  36.810  -1.150  1.00  0.00           H
ATOM   3305  HD2 ILE A 506      38.920  37.040  -2.740  1.00  0.00           H
ATOM   3306  HD3 ILE A 506      37.980  35.640  -2.420  1.00  0.00           H
ATOM   3307  C   ILE A 506      43.040  37.070   0.690  1.00  0.00           C
ATOM   3308  O   ILE A 506      44.000  37.580   0.230  1.00  0.00           O
ATOM   3309  N   GLU A 507      42.720  37.320   2.010  1.00  0.00           N
ATOM   3310  H   GLU A 507      42.080  36.690   2.470  1.00  0.00           H
ATOM   3311  CA  GLU A 507      43.560  38.160   2.900  1.00  0.00           C
ATOM   3312  HA  GLU A 507      43.710  39.140   2.450  1.00  0.00           H
ATOM   3313  CB  GLU A 507      42.880  38.460   4.260  1.00  0.00           C
ATOM   3314  HB1 GLU A 507      43.470  39.150   4.860  1.00  0.00           H
ATOM   3315  HB2 GLU A 507      42.730  37.590   4.900  1.00  0.00           H
ATOM   3316  CG  GLU A 507      41.520  39.140   4.080  1.00  0.00           C
ATOM   3317  HG1 GLU A 507      40.740  38.440   3.760  1.00  0.00           H
ATOM   3318  HG2 GLU A 507      41.630  39.910   3.320  1.00  0.00           H
ATOM   3319  CD  GLU A 507      41.180  39.890   5.350  1.00  0.00           C
ATOM   3320  OE1 GLU A 507      41.490  41.090   5.430  1.00  0.00           O
ATOM   3321  OE2 GLU A 507      40.610  39.250   6.270  1.00  0.00           O
ATOM   3322  C   GLU A 507      44.960  37.640   3.220  1.00  0.00           C
ATOM   3323  O   GLU A 507      45.950  38.350   3.030  1.00  0.00           O
ATOM   3324  N   MET A 508      45.180  36.350   3.400  1.00  0.00           N
ATOM   3325  H   MET A 508      44.400  35.710   3.510  1.00  0.00           H
ATOM   3326  CA  MET A 508      46.540  35.780   3.640  1.00  0.00           C
ATOM   3327  HA  MET A 508      47.020  36.370   4.420  1.00  0.00           H
ATOM   3328  CB  MET A 508      46.330  34.410   4.160  1.00  0.00           C
ATOM   3329  HB1 MET A 508      47.160  33.730   3.970  1.00  0.00           H
ATOM   3330  HB2 MET A 508      45.520  33.910   3.620  1.00  0.00           H
ATOM   3331  CG  MET A 508      46.070  34.400   5.710  1.00  0.00           C
ATOM   3332  HG1 MET A 508      45.160  34.990   5.850  1.00  0.00           H
ATOM   3333  HG2 MET A 508      46.910  34.760   6.300  1.00  0.00           H
ATOM   3334  SD  MET A 508      45.740  32.790   6.520  1.00  0.00           S
ATOM   3335  CE  MET A 508      44.370  32.210   5.550  1.00  0.00           C
ATOM   3336  HE1 MET A 508      43.800  31.440   6.080  1.00  0.00           H
ATOM   3337  HE2 MET A 508      43.630  33.000   5.450  1.00  0.00           H
ATOM   3338  HE3 MET A 508      44.630  31.740   4.600  1.00  0.00           H
ATOM   3339  C   MET A 508      47.390  35.700   2.420  1.00  0.00           C
ATOM   3340  O   MET A 508      48.650  35.740   2.510  1.00  0.00           O
ATOM   3341  N   VAL A 509      46.800  35.530   1.240  1.00  0.00           N
ATOM   3342  H   VAL A 509      45.790  35.420   1.270  1.00  0.00           H
ATOM   3343  CA  VAL A 509      47.590  35.390  -0.060  1.00  0.00           C
ATOM   3344  HA  VAL A 509      48.580  34.970   0.110  1.00  0.00           H
ATOM   3345  CB  VAL A 509      46.810  34.470  -0.920  1.00  0.00           C
ATOM   3346  HB  VAL A 509      45.820  34.920  -0.970  1.00  0.00           H
ATOM   3347  CG1 VAL A 509      47.600  34.300  -2.220  1.00  0.00           C
ATOM   3348 1HG1 VAL A 509      47.160  33.430  -2.710  1.00  0.00           H
ATOM   3349 2HG1 VAL A 509      47.400  35.060  -2.980  1.00  0.00           H
ATOM   3350 3HG1 VAL A 509      48.660  34.130  -2.070  1.00  0.00           H
ATOM   3351  CG2 VAL A 509      46.760  33.000  -0.360  1.00  0.00           C
ATOM   3352 1HG2 VAL A 509      45.990  32.480  -0.920  1.00  0.00           H
ATOM   3353 2HG2 VAL A 509      47.730  32.530  -0.490  1.00  0.00           H
ATOM   3354 3HG2 VAL A 509      46.430  32.980   0.690  1.00  0.00           H
ATOM   3355  C   VAL A 509      47.790  36.850  -0.670  1.00  0.00           C
ATOM   3356  O   VAL A 509      48.850  37.080  -1.210  1.00  0.00           O
ATOM   3357  N   ASP A 510      46.830  37.790  -0.580  1.00  0.00           N
ATOM   3358  H   ASP A 510      46.030  37.560   0.000  1.00  0.00           H
ATOM   3359  CA  ASP A 510      46.920  39.190  -1.270  1.00  0.00           C
ATOM   3360  HA  ASP A 510      47.940  39.330  -1.630  1.00  0.00           H
ATOM   3361  CB  ASP A 510      45.910  39.200  -2.430  1.00  0.00           C
ATOM   3362  HB1 ASP A 510      46.120  40.060  -3.060  1.00  0.00           H
ATOM   3363  HB2 ASP A 510      44.910  39.320  -2.010  1.00  0.00           H
ATOM   3364  CG  ASP A 510      45.840  37.930  -3.370  1.00  0.00           C
ATOM   3365  OD1 ASP A 510      46.880  37.470  -3.830  1.00  0.00           O
ATOM   3366  OD2 ASP A 510      44.710  37.560  -3.820  1.00  0.00           O
ATOM   3367  C   ASP A 510      46.550  40.410  -0.290  1.00  0.00           C
ATOM   3368  O   ASP A 510      46.650  41.520  -0.760  1.00  0.00           O
ATOM   3369  N   GLY A 511      46.470  40.200   1.010  1.00  0.00           N
ATOM   3370  H   GLY A 511      46.280  39.300   1.420  1.00  0.00           H
ATOM   3371  CA  GLY A 511      46.270  41.310   1.980  1.00  0.00           C
ATOM   3372  HA1 GLY A 511      47.060  42.050   1.850  1.00  0.00           H
ATOM   3373  HA2 GLY A 511      46.490  40.830   2.940  1.00  0.00           H
ATOM   3374  C   GLY A 511      44.920  41.930   2.080  1.00  0.00           C
ATOM   3375  O   GLY A 511      44.740  42.630   3.030  1.00  0.00           O
ATOM   3376  N   GLU A 512      43.920  41.780   1.210  1.00  0.00           N
ATOM   3377  H   GLU A 512      44.110  41.180   0.420  1.00  0.00           H
ATOM   3378  CA  GLU A 512      42.630  42.590   1.140  1.00  0.00           C
ATOM   3379  HA  GLU A 512      42.360  42.970   2.130  1.00  0.00           H
ATOM   3380  CB  GLU A 512      42.920  43.900   0.400  1.00  0.00           C
ATOM   3381  HB1 GLU A 512      43.070  43.630  -0.640  1.00  0.00           H
ATOM   3382  HB2 GLU A 512      43.820  44.400   0.770  1.00  0.00           H
ATOM   3383  CG  GLU A 512      41.900  45.010   0.600  1.00  0.00           C
ATOM   3384  HG1 GLU A 512      41.710  45.210   1.660  1.00  0.00           H
ATOM   3385  HG2 GLU A 512      41.000  44.620   0.120  1.00  0.00           H
ATOM   3386  CD  GLU A 512      42.300  46.250  -0.210  1.00  0.00           C
ATOM   3387  OE1 GLU A 512      43.040  47.120   0.310  1.00  0.00           O
ATOM   3388  OE2 GLU A 512      41.940  46.370  -1.410  1.00  0.00           O
ATOM   3389  C   GLU A 512      41.480  41.780   0.560  1.00  0.00           C
ATOM   3390  O   GLU A 512      41.740  40.970  -0.330  1.00  0.00           O
ATOM   3391  N   PRO A 513      40.230  41.910   0.990  1.00  0.00           N
ATOM   3392  CD  PRO A 513      39.900  42.570   2.180  1.00  0.00           C
ATOM   3393  HD1 PRO A 513      39.640  43.610   1.980  1.00  0.00           H
ATOM   3394  HD2 PRO A 513      40.710  42.350   2.860  1.00  0.00           H
ATOM   3395  CG  PRO A 513      38.700  41.770   2.670  1.00  0.00           C
ATOM   3396  HG1 PRO A 513      38.200  42.440   3.370  1.00  0.00           H
ATOM   3397  HG2 PRO A 513      39.000  40.800   3.070  1.00  0.00           H
ATOM   3398  CB  PRO A 513      37.900  41.460   1.400  1.00  0.00           C
ATOM   3399  HB1 PRO A 513      37.370  42.370   1.100  1.00  0.00           H
ATOM   3400  HB2 PRO A 513      37.270  40.570   1.430  1.00  0.00           H
ATOM   3401  CA  PRO A 513      39.040  41.290   0.370  1.00  0.00           C
ATOM   3402  HA  PRO A 513      39.130  40.220   0.180  1.00  0.00           H
ATOM   3403  C   PRO A 513      38.630  41.950  -0.950  1.00  0.00           C
ATOM   3404  O   PRO A 513      39.120  43.040  -1.300  1.00  0.00           O
ATOM   3405  N   PRO A 514      37.840  41.270  -1.810  1.00  0.00           N
ATOM   3406  CD  PRO A 514      37.400  39.860  -1.630  1.00  0.00           C
ATOM   3407  HD1 PRO A 514      36.570  39.820  -0.920  1.00  0.00           H
ATOM   3408  HD2 PRO A 514      38.220  39.260  -1.240  1.00  0.00           H
ATOM   3409  CG  PRO A 514      37.130  39.310  -3.070  1.00  0.00           C
ATOM   3410  HG1 PRO A 514      36.320  38.580  -3.030  1.00  0.00           H
ATOM   3411  HG2 PRO A 514      38.030  38.940  -3.580  1.00  0.00           H
ATOM   3412  CB  PRO A 514      36.620  40.550  -3.790  1.00  0.00           C
ATOM   3413  HB1 PRO A 514      35.560  40.810  -3.730  1.00  0.00           H
ATOM   3414  HB2 PRO A 514      36.930  40.350  -4.820  1.00  0.00           H
ATOM   3415  CA  PRO A 514      37.370  41.760  -3.110  1.00  0.00           C
ATOM   3416  HA  PRO A 514      38.270  42.020  -3.660  1.00  0.00           H
ATOM   3417  C   PRO A 514      36.530  43.000  -2.890  1.00  0.00           C
ATOM   3418  O   PRO A 514      35.670  43.140  -2.020  1.00  0.00           O
ATOM   3419  N   TYR A 515      36.680  43.980  -3.810  1.00  0.00           N
ATOM   3420  H   TYR A 515      37.450  43.870  -4.450  1.00  0.00           H
ATOM   3421  CA  TYR A 515      35.920  45.310  -3.910  1.00  0.00           C
ATOM   3422  HA  TYR A 515      36.490  45.910  -4.620  1.00  0.00           H
ATOM   3423  CB  TYR A 515      34.480  45.120  -4.480  1.00  0.00           C
ATOM   3424  HB1 TYR A 515      34.110  46.060  -4.880  1.00  0.00           H
ATOM   3425  HB2 TYR A 515      33.790  44.940  -3.660  1.00  0.00           H
ATOM   3426  CG  TYR A 515      34.380  44.070  -5.610  1.00  0.00           C
ATOM   3427  CD1 TYR A 515      34.710  44.340  -6.930  1.00  0.00           C
ATOM   3428  HD1 TYR A 515      35.080  45.330  -7.190  1.00  0.00           H
ATOM   3429  CE1 TYR A 515      34.580  43.410  -7.940  1.00  0.00           C
ATOM   3430  HE1 TYR A 515      34.820  43.590  -8.970  1.00  0.00           H
ATOM   3431  CZ  TYR A 515      34.140  42.150  -7.610  1.00  0.00           C
ATOM   3432  OH  TYR A 515      34.030  41.190  -8.570  1.00  0.00           O
ATOM   3433  HH  TYR A 515      33.610  40.380  -8.280  1.00  0.00           H
ATOM   3434  CE2 TYR A 515      33.850  41.820  -6.290  1.00  0.00           C
ATOM   3435  HE2 TYR A 515      33.420  40.860  -6.050  1.00  0.00           H
ATOM   3436  CD2 TYR A 515      33.910  42.830  -5.250  1.00  0.00           C
ATOM   3437  HD2 TYR A 515      33.690  42.540  -4.240  1.00  0.00           H
ATOM   3438  C   TYR A 515      35.960  46.160  -2.720  1.00  0.00           C
ATOM   3439  O   TYR A 515      35.140  47.070  -2.570  1.00  0.00           O
ATOM   3440  N   PHE A 516      36.920  45.910  -1.800  1.00  0.00           N
ATOM   3441  H   PHE A 516      37.590  45.160  -1.900  1.00  0.00           H
ATOM   3442  CA  PHE A 516      37.000  46.560  -0.550  1.00  0.00           C
ATOM   3443  HA  PHE A 516      36.120  46.320   0.040  1.00  0.00           H
ATOM   3444  CB  PHE A 516      38.130  45.970   0.340  1.00  0.00           C
ATOM   3445  HB1 PHE A 516      39.140  45.900  -0.080  1.00  0.00           H
ATOM   3446  HB2 PHE A 516      38.010  44.880   0.300  1.00  0.00           H
ATOM   3447  CG  PHE A 516      38.090  46.260   1.860  1.00  0.00           C
ATOM   3448  CD1 PHE A 516      37.120  45.710   2.750  1.00  0.00           C
ATOM   3449  HD1 PHE A 516      36.400  44.980   2.390  1.00  0.00           H
ATOM   3450  CE1 PHE A 516      37.210  46.040   4.120  1.00  0.00           C
ATOM   3451  HE1 PHE A 516      36.540  45.530   4.790  1.00  0.00           H
ATOM   3452  CZ  PHE A 516      38.140  46.980   4.660  1.00  0.00           C
ATOM   3453  HZ  PHE A 516      38.100  47.220   5.710  1.00  0.00           H
ATOM   3454  CE2 PHE A 516      39.010  47.610   3.770  1.00  0.00           C
ATOM   3455  HE2 PHE A 516      39.740  48.300   4.140  1.00  0.00           H
ATOM   3456  CD2 PHE A 516      39.000  47.260   2.390  1.00  0.00           C
ATOM   3457  HD2 PHE A 516      39.770  47.800   1.860  1.00  0.00           H
ATOM   3458  C   PHE A 516      37.030  48.060  -0.600  1.00  0.00           C
ATOM   3459  O   PHE A 516      36.620  48.690   0.380  1.00  0.00           O
ATOM   3460  N   ASN A 517      37.520  48.630  -1.650  1.00  0.00           N
ATOM   3461  H   ASN A 517      37.890  48.110  -2.430  1.00  0.00           H
ATOM   3462  CA  ASN A 517      37.710  50.110  -1.810  1.00  0.00           C
ATOM   3463  HA  ASN A 517      37.870  50.570  -0.840  1.00  0.00           H
ATOM   3464  CB  ASN A 517      38.960  50.490  -2.550  1.00  0.00           C
ATOM   3465  HB1 ASN A 517      39.140  51.570  -2.580  1.00  0.00           H
ATOM   3466  HB2 ASN A 517      38.900  50.260  -3.620  1.00  0.00           H
ATOM   3467  CG  ASN A 517      40.170  49.770  -1.890  1.00  0.00           C
ATOM   3468  OD1 ASN A 517      40.650  50.180  -0.840  1.00  0.00           O
ATOM   3469  ND2 ASN A 517      40.540  48.630  -2.450  1.00  0.00           N
ATOM   3470 1HD2 ASN A 517      39.930  48.270  -3.160  1.00  0.00           H
ATOM   3471 2HD2 ASN A 517      41.170  48.000  -1.950  1.00  0.00           H
ATOM   3472  C   ASN A 517      36.450  50.780  -2.410  1.00  0.00           C
ATOM   3473  O   ASN A 517      36.440  51.980  -2.560  1.00  0.00           O
ATOM   3474  N   GLU A 518      35.440  50.030  -2.720  1.00  0.00           N
ATOM   3475  H   GLU A 518      35.430  49.070  -2.420  1.00  0.00           H
ATOM   3476  CA  GLU A 518      34.180  50.410  -3.320  1.00  0.00           C
ATOM   3477  HA  GLU A 518      34.210  51.390  -3.800  1.00  0.00           H
ATOM   3478  CB  GLU A 518      33.670  49.460  -4.400  1.00  0.00           C
ATOM   3479  HB1 GLU A 518      32.700  49.810  -4.750  1.00  0.00           H
ATOM   3480  HB2 GLU A 518      33.560  48.450  -3.990  1.00  0.00           H
ATOM   3481  CG  GLU A 518      34.570  49.450  -5.620  1.00  0.00           C
ATOM   3482  HG1 GLU A 518      34.360  48.620  -6.290  1.00  0.00           H
ATOM   3483  HG2 GLU A 518      35.630  49.480  -5.340  1.00  0.00           H
ATOM   3484  CD  GLU A 518      34.260  50.730  -6.390  1.00  0.00           C
ATOM   3485  OE1 GLU A 518      35.130  51.610  -6.510  1.00  0.00           O
ATOM   3486  OE2 GLU A 518      33.170  50.730  -6.970  1.00  0.00           O
ATOM   3487  C   GLU A 518      33.240  50.620  -2.200  1.00  0.00           C
ATOM   3488  O   GLU A 518      33.410  50.030  -1.130  1.00  0.00           O
ATOM   3489  N   PRO A 519      32.110  51.440  -2.300  1.00  0.00           N
ATOM   3490  CD  PRO A 519      31.840  52.300  -3.420  1.00  0.00           C
ATOM   3491  HD1 PRO A 519      31.200  51.850  -4.170  1.00  0.00           H
ATOM   3492  HD2 PRO A 519      32.700  52.630  -4.010  1.00  0.00           H
ATOM   3493  CG  PRO A 519      30.990  53.470  -2.900  1.00  0.00           C
ATOM   3494  HG1 PRO A 519      30.240  53.900  -3.570  1.00  0.00           H
ATOM   3495  HG2 PRO A 519      31.700  54.220  -2.560  1.00  0.00           H
ATOM   3496  CB  PRO A 519      30.190  52.800  -1.790  1.00  0.00           C
ATOM   3497  HB1 PRO A 519      29.200  52.510  -2.160  1.00  0.00           H
ATOM   3498  HB2 PRO A 519      30.030  53.530  -0.990  1.00  0.00           H
ATOM   3499  CA  PRO A 519      31.040  51.650  -1.320  1.00  0.00           C
ATOM   3500  HA  PRO A 519      31.480  51.830  -0.340  1.00  0.00           H
ATOM   3501  C   PRO A 519      30.160  50.410  -1.000  1.00  0.00           C
ATOM   3502  O   PRO A 519      29.820  49.630  -1.870  1.00  0.00           O
ATOM   3503  N   PRO A 520      29.880  50.150   0.270  1.00  0.00           N
ATOM   3504  CD  PRO A 520      30.160  51.070   1.400  1.00  0.00           C
ATOM   3505  HD1 PRO A 520      29.520  51.940   1.240  1.00  0.00           H
ATOM   3506  HD2 PRO A 520      31.200  51.320   1.590  1.00  0.00           H
ATOM   3507  CG  PRO A 520      29.820  50.290   2.620  1.00  0.00           C
ATOM   3508  HG1 PRO A 520      29.390  50.900   3.420  1.00  0.00           H
ATOM   3509  HG2 PRO A 520      30.760  49.840   2.950  1.00  0.00           H
ATOM   3510  CB  PRO A 520      29.050  49.090   2.160  1.00  0.00           C
ATOM   3511  HB1 PRO A 520      28.020  49.120   2.520  1.00  0.00           H
ATOM   3512  HB2 PRO A 520      29.390  48.170   2.640  1.00  0.00           H
ATOM   3513  CA  PRO A 520      29.200  48.930   0.650  1.00  0.00           C
ATOM   3514  HA  PRO A 520      29.900  48.130   0.390  1.00  0.00           H
ATOM   3515  C   PRO A 520      27.890  48.550  -0.060  1.00  0.00           C
ATOM   3516  O   PRO A 520      27.770  47.390  -0.550  1.00  0.00           O
ATOM   3517  N   LEU A 521      26.970  49.490  -0.350  1.00  0.00           N
ATOM   3518  H   LEU A 521      27.250  50.440  -0.150  1.00  0.00           H
ATOM   3519  CA  LEU A 521      25.700  49.250  -1.060  1.00  0.00           C
ATOM   3520  HA  LEU A 521      25.260  48.350  -0.630  1.00  0.00           H
ATOM   3521  CB  LEU A 521      24.740  50.440  -0.880  1.00  0.00           C
ATOM   3522  HB1 LEU A 521      23.790  50.410  -1.420  1.00  0.00           H
ATOM   3523  HB2 LEU A 521      25.200  51.300  -1.370  1.00  0.00           H
ATOM   3524  CG  LEU A 521      24.370  50.760   0.590  1.00  0.00           C
ATOM   3525  HG  LEU A 521      25.290  51.050   1.080  1.00  0.00           H
ATOM   3526  CD1 LEU A 521      23.290  51.890   0.580  1.00  0.00           C
ATOM   3527 1HD1 LEU A 521      23.650  52.760   0.030  1.00  0.00           H
ATOM   3528 2HD1 LEU A 521      22.360  51.570   0.110  1.00  0.00           H
ATOM   3529 3HD1 LEU A 521      23.180  52.170   1.630  1.00  0.00           H
ATOM   3530  CD2 LEU A 521      23.900  49.600   1.450  1.00  0.00           C
ATOM   3531 1HD2 LEU A 521      23.120  49.070   0.890  1.00  0.00           H
ATOM   3532 2HD2 LEU A 521      24.790  48.980   1.590  1.00  0.00           H
ATOM   3533 3HD2 LEU A 521      23.550  49.990   2.410  1.00  0.00           H
ATOM   3534  C   LEU A 521      25.800  48.990  -2.580  1.00  0.00           C
ATOM   3535  O   LEU A 521      24.800  48.670  -3.270  1.00  0.00           O
ATOM   3536  N   LYS A 522      27.030  49.220  -3.100  1.00  0.00           N
ATOM   3537  H   LYS A 522      27.760  49.490  -2.470  1.00  0.00           H
ATOM   3538  CA  LYS A 522      27.320  48.970  -4.570  1.00  0.00           C
ATOM   3539  HA  LYS A 522      26.440  48.690  -5.150  1.00  0.00           H
ATOM   3540  CB  LYS A 522      27.910  50.280  -5.190  1.00  0.00           C
ATOM   3541  HB1 LYS A 522      28.150  50.000  -6.220  1.00  0.00           H
ATOM   3542  HB2 LYS A 522      28.870  50.540  -4.740  1.00  0.00           H
ATOM   3543  CG  LYS A 522      26.890  51.410  -5.130  1.00  0.00           C
ATOM   3544  HG1 LYS A 522      26.770  51.640  -4.070  1.00  0.00           H
ATOM   3545  HG2 LYS A 522      25.990  51.130  -5.670  1.00  0.00           H
ATOM   3546  CD  LYS A 522      27.520  52.700  -5.740  1.00  0.00           C
ATOM   3547  HD1 LYS A 522      28.520  52.870  -5.340  1.00  0.00           H
ATOM   3548  HD2 LYS A 522      26.870  53.550  -5.520  1.00  0.00           H
ATOM   3549  CE  LYS A 522      27.720  52.680  -7.240  1.00  0.00           C
ATOM   3550  HE1 LYS A 522      26.880  52.110  -7.640  1.00  0.00           H
ATOM   3551  HE2 LYS A 522      28.460  51.920  -7.510  1.00  0.00           H
ATOM   3552  NZ  LYS A 522      27.820  53.990  -7.890  1.00  0.00           N
ATOM   3553  HZ1 LYS A 522      27.900  53.770  -8.870  1.00  0.00           H
ATOM   3554  HZ2 LYS A 522      27.030  54.570  -7.650  1.00  0.00           H
ATOM   3555  HZ3 LYS A 522      28.700  54.400  -7.610  1.00  0.00           H
ATOM   3556  C   LYS A 522      28.280  47.780  -4.790  1.00  0.00           C
ATOM   3557  O   LYS A 522      28.070  47.060  -5.750  1.00  0.00           O
ATOM   3558  N   ALA A 523      29.150  47.500  -3.820  1.00  0.00           N
ATOM   3559  H   ALA A 523      29.340  48.170  -3.090  1.00  0.00           H
ATOM   3560  CA  ALA A 523      30.000  46.340  -3.770  1.00  0.00           C
ATOM   3561  HA  ALA A 523      30.480  46.310  -4.750  1.00  0.00           H
ATOM   3562  CB  ALA A 523      31.010  46.650  -2.670  1.00  0.00           C
ATOM   3563  HB1 ALA A 523      30.410  46.990  -1.830  1.00  0.00           H
ATOM   3564  HB2 ALA A 523      31.510  45.740  -2.330  1.00  0.00           H
ATOM   3565  HB3 ALA A 523      31.770  47.360  -2.980  1.00  0.00           H
ATOM   3566  C   ALA A 523      29.110  45.020  -3.560  1.00  0.00           C
ATOM   3567  O   ALA A 523      29.340  44.110  -4.350  1.00  0.00           O
ATOM   3568  N   MET A 524      28.030  45.060  -2.790  1.00  0.00           N
ATOM   3569  H   MET A 524      27.900  45.800  -2.120  1.00  0.00           H
ATOM   3570  CA  MET A 524      26.960  44.080  -2.730  1.00  0.00           C
ATOM   3571  HA  MET A 524      27.250  43.180  -2.180  1.00  0.00           H
ATOM   3572  CB  MET A 524      25.670  44.680  -2.060  1.00  0.00           C
ATOM   3573  HB1 MET A 524      24.780  44.100  -2.280  1.00  0.00           H
ATOM   3574  HB2 MET A 524      25.470  45.730  -2.280  1.00  0.00           H
ATOM   3575  CG  MET A 524      25.820  44.710  -0.550  1.00  0.00           C
ATOM   3576  HG1 MET A 524      26.680  45.310  -0.270  1.00  0.00           H
ATOM   3577  HG2 MET A 524      25.970  43.720  -0.110  1.00  0.00           H
ATOM   3578  SD  MET A 524      24.550  45.520   0.490  1.00  0.00           S
ATOM   3579  CE  MET A 524      25.210  45.310   2.180  1.00  0.00           C
ATOM   3580  HE1 MET A 524      25.610  44.320   2.400  1.00  0.00           H
ATOM   3581  HE2 MET A 524      26.120  45.890   2.300  1.00  0.00           H
ATOM   3582  HE3 MET A 524      24.530  45.720   2.930  1.00  0.00           H
ATOM   3583  C   MET A 524      26.490  43.500  -4.140  1.00  0.00           C
ATOM   3584  O   MET A 524      25.980  42.400  -4.110  1.00  0.00           O
ATOM   3585  N   LYS A 525      26.460  44.390  -5.210  1.00  0.00           N
ATOM   3586  H   LYS A 525      26.980  45.250  -5.110  1.00  0.00           H
ATOM   3587  CA  LYS A 525      25.970  44.000  -6.550  1.00  0.00           C
ATOM   3588  HA  LYS A 525      25.050  43.490  -6.270  1.00  0.00           H
ATOM   3589  CB  LYS A 525      25.690  45.210  -7.430  1.00  0.00           C
ATOM   3590  HB1 LYS A 525      26.670  45.670  -7.520  1.00  0.00           H
ATOM   3591  HB2 LYS A 525      25.110  45.860  -6.770  1.00  0.00           H
ATOM   3592  CG  LYS A 525      25.040  45.010  -8.790  1.00  0.00           C
ATOM   3593  HG1 LYS A 525      23.980  45.000  -8.530  1.00  0.00           H
ATOM   3594  HG2 LYS A 525      25.400  44.030  -9.090  1.00  0.00           H
ATOM   3595  CD  LYS A 525      25.350  46.010  -9.880  1.00  0.00           C
ATOM   3596  HD1 LYS A 525      26.380  45.880 -10.210  1.00  0.00           H
ATOM   3597  HD2 LYS A 525      25.060  47.010  -9.540  1.00  0.00           H
ATOM   3598  CE  LYS A 525      24.450  45.800 -11.130  1.00  0.00           C
ATOM   3599  HE1 LYS A 525      24.750  46.570 -11.830  1.00  0.00           H
ATOM   3600  HE2 LYS A 525      23.450  45.970 -10.750  1.00  0.00           H
ATOM   3601  NZ  LYS A 525      24.520  44.460 -11.770  1.00  0.00           N
ATOM   3602  HZ1 LYS A 525      24.250  43.730 -11.140  1.00  0.00           H
ATOM   3603  HZ2 LYS A 525      24.060  44.380 -12.670  1.00  0.00           H
ATOM   3604  HZ3 LYS A 525      25.480  44.210 -11.960  1.00  0.00           H
ATOM   3605  C   LYS A 525      26.940  43.020  -7.230  1.00  0.00           C
ATOM   3606  O   LYS A 525      26.480  42.140  -7.920  1.00  0.00           O
ATOM   3607  N   MET A 526      28.250  43.220  -6.980  1.00  0.00           N
ATOM   3608  H   MET A 526      28.530  44.110  -6.580  1.00  0.00           H
ATOM   3609  CA  MET A 526      29.370  42.350  -7.440  1.00  0.00           C
ATOM   3610  HA  MET A 526      29.150  42.070  -8.470  1.00  0.00           H
ATOM   3611  CB  MET A 526      30.840  42.950  -7.260  1.00  0.00           C
ATOM   3612  HB1 MET A 526      31.480  42.620  -8.080  1.00  0.00           H
ATOM   3613  HB2 MET A 526      31.250  42.830  -6.260  1.00  0.00           H
ATOM   3614  CG  MET A 526      30.770  44.470  -7.500  1.00  0.00           C
ATOM   3615  HG1 MET A 526      31.780  44.860  -7.360  1.00  0.00           H
ATOM   3616  HG2 MET A 526      30.170  45.050  -6.810  1.00  0.00           H
ATOM   3617  SD  MET A 526      30.020  44.890  -9.100  1.00  0.00           S
ATOM   3618  CE  MET A 526      31.320  44.250 -10.200  1.00  0.00           C
ATOM   3619  HE1 MET A 526      31.250  43.190 -10.450  1.00  0.00           H
ATOM   3620  HE2 MET A 526      31.170  44.860 -11.090  1.00  0.00           H
ATOM   3621  HE3 MET A 526      32.280  44.600  -9.820  1.00  0.00           H
ATOM   3622  C   MET A 526      29.340  41.010  -6.720  1.00  0.00           C
ATOM   3623  O   MET A 526      29.510  39.930  -7.340  1.00  0.00           O
ATOM   3624  N   ILE A 527      29.080  41.040  -5.410  1.00  0.00           N
ATOM   3625  H   ILE A 527      28.800  41.950  -5.060  1.00  0.00           H
ATOM   3626  CA  ILE A 527      28.960  39.840  -4.550  1.00  0.00           C
ATOM   3627  HA  ILE A 527      29.790  39.140  -4.690  1.00  0.00           H
ATOM   3628  CB  ILE A 527      28.980  40.230  -3.060  1.00  0.00           C
ATOM   3629  HB  ILE A 527      28.040  40.720  -2.790  1.00  0.00           H
ATOM   3630  CG2 ILE A 527      29.100  38.930  -2.220  1.00  0.00           C
ATOM   3631 1HG2 ILE A 527      28.170  38.370  -2.310  1.00  0.00           H
ATOM   3632 2HG2 ILE A 527      29.950  38.320  -2.540  1.00  0.00           H
ATOM   3633 3HG2 ILE A 527      29.230  39.250  -1.190  1.00  0.00           H
ATOM   3634  CG1 ILE A 527      30.210  41.110  -2.780  1.00  0.00           C
ATOM   3635 1HG1 ILE A 527      30.430  41.860  -3.530  1.00  0.00           H
ATOM   3636 2HG1 ILE A 527      31.030  40.390  -2.860  1.00  0.00           H
ATOM   3637  CD  ILE A 527      30.290  41.800  -1.390  1.00  0.00           C
ATOM   3638  HD1 ILE A 527      29.690  42.710  -1.330  1.00  0.00           H
ATOM   3639  HD2 ILE A 527      29.840  41.140  -0.650  1.00  0.00           H
ATOM   3640  HD3 ILE A 527      31.280  41.930  -0.940  1.00  0.00           H
ATOM   3641  C   ILE A 527      27.670  39.100  -4.920  1.00  0.00           C
ATOM   3642  O   ILE A 527      27.660  37.890  -4.750  1.00  0.00           O
ATOM   3643  N   ARG A 528      26.690  39.740  -5.630  1.00  0.00           N
ATOM   3644  H   ARG A 528      26.820  40.730  -5.740  1.00  0.00           H
ATOM   3645  CA  ARG A 528      25.390  39.090  -5.880  1.00  0.00           C
ATOM   3646  HA  ARG A 528      25.270  38.260  -5.190  1.00  0.00           H
ATOM   3647  CB  ARG A 528      24.350  40.200  -5.550  1.00  0.00           C
ATOM   3648  HB1 ARG A 528      24.470  40.990  -6.290  1.00  0.00           H
ATOM   3649  HB2 ARG A 528      24.540  40.750  -4.630  1.00  0.00           H
ATOM   3650  CG  ARG A 528      22.930  39.660  -5.520  1.00  0.00           C
ATOM   3651  HG1 ARG A 528      22.890  38.880  -4.750  1.00  0.00           H
ATOM   3652  HG2 ARG A 528      22.590  39.330  -6.500  1.00  0.00           H
ATOM   3653  CD  ARG A 528      21.910  40.770  -5.270  1.00  0.00           C
ATOM   3654  HD1 ARG A 528      22.160  41.150  -4.280  1.00  0.00           H
ATOM   3655  HD2 ARG A 528      20.910  40.340  -5.280  1.00  0.00           H
ATOM   3656  NE  ARG A 528      21.990  41.700  -6.400  1.00  0.00           N
ATOM   3657  HE  ARG A 528      22.370  41.340  -7.260  1.00  0.00           H
ATOM   3658  CZ  ARG A 528      21.540  42.880  -6.440  1.00  0.00           C
ATOM   3659  NH1 ARG A 528      20.850  43.510  -5.520  1.00  0.00           N
ATOM   3660 1HH1 ARG A 528      20.600  43.060  -4.650  1.00  0.00           H
ATOM   3661 2HH1 ARG A 528      20.920  44.510  -5.510  1.00  0.00           H
ATOM   3662  NH2 ARG A 528      21.800  43.550  -7.540  1.00  0.00           N
ATOM   3663 1HH2 ARG A 528      22.230  43.050  -8.310  1.00  0.00           H
ATOM   3664 2HH2 ARG A 528      21.270  44.370  -7.780  1.00  0.00           H
ATOM   3665  C   ARG A 528      25.180  38.660  -7.350  1.00  0.00           C
ATOM   3666  O   ARG A 528      24.520  37.700  -7.560  1.00  0.00           O
ATOM   3667  N   ASP A 529      25.680  39.380  -8.320  1.00  0.00           N
ATOM   3668  H   ASP A 529      26.330  40.110  -8.040  1.00  0.00           H
ATOM   3669  CA  ASP A 529      25.360  39.270  -9.700  1.00  0.00           C
ATOM   3670  HA  ASP A 529      24.540  38.570  -9.830  1.00  0.00           H
ATOM   3671  CB  ASP A 529      24.820  40.580 -10.250  1.00  0.00           C
ATOM   3672  HB1 ASP A 529      24.490  40.430 -11.280  1.00  0.00           H
ATOM   3673  HB2 ASP A 529      25.620  41.330 -10.250  1.00  0.00           H
ATOM   3674  CG  ASP A 529      23.610  41.210  -9.550  1.00  0.00           C
ATOM   3675  OD1 ASP A 529      22.890  40.490  -8.810  1.00  0.00           O
ATOM   3676  OD2 ASP A 529      23.290  42.320  -9.970  1.00  0.00           O
ATOM   3677  C   ASP A 529      26.530  38.710 -10.570  1.00  0.00           C
ATOM   3678  O   ASP A 529      26.220  38.260 -11.650  1.00  0.00           O
ATOM   3679  N   ASN A 530      27.840  38.570 -10.050  1.00  0.00           N
ATOM   3680  H   ASN A 530      27.970  38.800  -9.080  1.00  0.00           H
ATOM   3681  CA  ASN A 530      29.060  38.160 -10.690  1.00  0.00           C
ATOM   3682  HA  ASN A 530      28.810  38.010 -11.740  1.00  0.00           H
ATOM   3683  CB  ASN A 530      30.060  39.310 -10.740  1.00  0.00           C
ATOM   3684  HB1 ASN A 530      31.070  39.030 -11.020  1.00  0.00           H
ATOM   3685  HB2 ASN A 530      30.100  39.690  -9.720  1.00  0.00           H
ATOM   3686  CG  ASN A 530      29.540  40.500 -11.640  1.00  0.00           C
ATOM   3687  OD1 ASN A 530      29.300  41.650 -11.350  1.00  0.00           O
ATOM   3688  ND2 ASN A 530      29.300  40.120 -12.820  1.00  0.00           N
ATOM   3689 1HD2 ASN A 530      29.640  39.220 -13.150  1.00  0.00           H
ATOM   3690 2HD2 ASN A 530      29.150  40.860 -13.480  1.00  0.00           H
ATOM   3691  C   ASN A 530      29.570  36.880 -10.020  1.00  0.00           C
ATOM   3692  O   ASN A 530      29.380  36.730  -8.790  1.00  0.00           O
ATOM   3693  N   LEU A 531      30.220  36.030 -10.830  1.00  0.00           N
ATOM   3694  H   LEU A 531      30.510  36.340 -11.740  1.00  0.00           H
ATOM   3695  CA  LEU A 531      30.680  34.720 -10.400  1.00  0.00           C
ATOM   3696  HA  LEU A 531      29.810  34.300  -9.900  1.00  0.00           H
ATOM   3697  CB  LEU A 531      31.050  33.770 -11.590  1.00  0.00           C
ATOM   3698  HB1 LEU A 531      31.670  32.960 -11.200  1.00  0.00           H
ATOM   3699  HB2 LEU A 531      31.690  34.280 -12.320  1.00  0.00           H
ATOM   3700  CG  LEU A 531      29.970  33.140 -12.440  1.00  0.00           C
ATOM   3701  HG  LEU A 531      29.320  33.870 -12.920  1.00  0.00           H
ATOM   3702  CD1 LEU A 531      30.600  32.380 -13.590  1.00  0.00           C
ATOM   3703 1HD1 LEU A 531      29.900  31.980 -14.320  1.00  0.00           H
ATOM   3704 2HD1 LEU A 531      31.310  33.000 -14.140  1.00  0.00           H
ATOM   3705 3HD1 LEU A 531      31.190  31.530 -13.250  1.00  0.00           H
ATOM   3706  CD2 LEU A 531      28.980  32.170 -11.670  1.00  0.00           C
ATOM   3707 1HD2 LEU A 531      28.500  31.590 -12.450  1.00  0.00           H
ATOM   3708 2HD2 LEU A 531      29.520  31.460 -11.040  1.00  0.00           H
ATOM   3709 3HD2 LEU A 531      28.230  32.800 -11.200  1.00  0.00           H
ATOM   3710  C   LEU A 531      31.910  34.730  -9.440  1.00  0.00           C
ATOM   3711  O   LEU A 531      32.460  35.840  -9.260  1.00  0.00           O
ATOM   3712  N   PRO A 532      32.280  33.640  -8.700  1.00  0.00           N
ATOM   3713  CD  PRO A 532      31.580  32.330  -8.660  1.00  0.00           C
ATOM   3714  HD1 PRO A 532      31.970  31.760  -9.510  1.00  0.00           H
ATOM   3715  HD2 PRO A 532      30.520  32.410  -8.920  1.00  0.00           H
ATOM   3716  CG  PRO A 532      31.950  31.740  -7.260  1.00  0.00           C
ATOM   3717  HG1 PRO A 532      31.990  30.650  -7.290  1.00  0.00           H
ATOM   3718  HG2 PRO A 532      31.300  32.000  -6.420  1.00  0.00           H
ATOM   3719  CB  PRO A 532      33.340  32.290  -6.940  1.00  0.00           C
ATOM   3720  HB1 PRO A 532      34.110  31.880  -7.600  1.00  0.00           H
ATOM   3721  HB2 PRO A 532      33.620  32.290  -5.890  1.00  0.00           H
ATOM   3722  CA  PRO A 532      33.190  33.760  -7.500  1.00  0.00           C
ATOM   3723  HA  PRO A 532      32.540  34.240  -6.760  1.00  0.00           H
ATOM   3724  C   PRO A 532      34.580  34.410  -7.760  1.00  0.00           C
ATOM   3725  O   PRO A 532      35.160  34.110  -8.810  1.00  0.00           O
ATOM   3726  N   PRO A 533      35.120  35.240  -6.840  1.00  0.00           N
ATOM   3727  CD  PRO A 533      34.530  35.530  -5.580  1.00  0.00           C
ATOM   3728  HD1 PRO A 533      34.080  34.680  -5.080  1.00  0.00           H
ATOM   3729  HD2 PRO A 533      33.790  36.330  -5.700  1.00  0.00           H
ATOM   3730  CG  PRO A 533      35.720  35.990  -4.690  1.00  0.00           C
ATOM   3731  HG1 PRO A 533      36.260  35.170  -4.220  1.00  0.00           H
ATOM   3732  HG2 PRO A 533      35.300  36.640  -3.930  1.00  0.00           H
ATOM   3733  CB  PRO A 533      36.500  36.830  -5.710  1.00  0.00           C
ATOM   3734  HB1 PRO A 533      37.520  36.920  -5.320  1.00  0.00           H
ATOM   3735  HB2 PRO A 533      35.880  37.720  -5.850  1.00  0.00           H
ATOM   3736  CA  PRO A 533      36.380  35.970  -6.980  1.00  0.00           C
ATOM   3737  HA  PRO A 533      36.330  36.450  -7.950  1.00  0.00           H
ATOM   3738  C   PRO A 533      37.620  34.960  -7.010  1.00  0.00           C
ATOM   3739  O   PRO A 533      37.560  33.820  -6.580  1.00  0.00           O
ATOM   3740  N   ARG A 534      38.780  35.440  -7.420  1.00  0.00           N
ATOM   3741  H   ARG A 534      38.740  36.440  -7.550  1.00  0.00           H
ATOM   3742  CA  ARG A 534      40.120  34.750  -7.540  1.00  0.00           C
ATOM   3743  HA  ARG A 534      40.020  33.820  -6.980  1.00  0.00           H
ATOM   3744  CB  ARG A 534      40.350  34.300  -9.040  1.00  0.00           C
ATOM   3745  HB1 ARG A 534      41.410  34.340  -9.300  1.00  0.00           H
ATOM   3746  HB2 ARG A 534      39.920  34.960  -9.800  1.00  0.00           H
ATOM   3747  CG  ARG A 534      39.870  32.910  -9.270  1.00  0.00           C
ATOM   3748  HG1 ARG A 534      38.850  32.780  -8.920  1.00  0.00           H
ATOM   3749  HG2 ARG A 534      40.460  32.290  -8.590  1.00  0.00           H
ATOM   3750  CD  ARG A 534      40.000  32.390 -10.660  1.00  0.00           C
ATOM   3751  HD1 ARG A 534      39.620  31.370 -10.690  1.00  0.00           H
ATOM   3752  HD2 ARG A 534      41.060  32.330 -10.900  1.00  0.00           H
ATOM   3753  NE  ARG A 534      39.490  33.280 -11.700  1.00  0.00           N
ATOM   3754  HE  ARG A 534      39.070  34.140 -11.380  1.00  0.00           H
ATOM   3755  CZ  ARG A 534      39.230  32.950 -12.970  1.00  0.00           C
ATOM   3756  NH1 ARG A 534      38.580  33.750 -13.750  1.00  0.00           N
ATOM   3757 1HH1 ARG A 534      38.230  34.630 -13.410  1.00  0.00           H
ATOM   3758 2HH1 ARG A 534      38.420  33.350 -14.660  1.00  0.00           H
ATOM   3759  NH2 ARG A 534      39.750  31.810 -13.470  1.00  0.00           N
ATOM   3760 1HH2 ARG A 534      40.510  31.410 -12.930  1.00  0.00           H
ATOM   3761 2HH2 ARG A 534      39.560  31.530 -14.420  1.00  0.00           H
ATOM   3762  C   ARG A 534      41.270  35.610  -6.870  1.00  0.00           C
ATOM   3763  O   ARG A 534      41.070  36.830  -6.640  1.00  0.00           O
ATOM   3764  N   LEU A 535      42.440  35.020  -6.610  1.00  0.00           N
ATOM   3765  H   LEU A 535      42.510  34.050  -6.870  1.00  0.00           H
ATOM   3766  CA  LEU A 535      43.600  35.610  -5.990  1.00  0.00           C
ATOM   3767  HA  LEU A 535      43.220  36.310  -5.250  1.00  0.00           H
ATOM   3768  CB  LEU A 535      44.530  34.560  -5.470  1.00  0.00           C
ATOM   3769  HB1 LEU A 535      45.260  35.100  -4.860  1.00  0.00           H
ATOM   3770  HB2 LEU A 535      44.980  34.030  -6.310  1.00  0.00           H
ATOM   3771  CG  LEU A 535      43.950  33.560  -4.500  1.00  0.00           C
ATOM   3772  HG  LEU A 535      42.890  33.440  -4.710  1.00  0.00           H
ATOM   3773  CD1 LEU A 535      44.770  32.180  -4.560  1.00  0.00           C
ATOM   3774 1HD1 LEU A 535      45.750  32.580  -4.320  1.00  0.00           H
ATOM   3775 2HD1 LEU A 535      44.490  31.440  -3.800  1.00  0.00           H
ATOM   3776 3HD1 LEU A 535      44.660  31.730  -5.550  1.00  0.00           H
ATOM   3777  CD2 LEU A 535      44.040  34.250  -3.180  1.00  0.00           C
ATOM   3778 1HD2 LEU A 535      43.520  33.690  -2.400  1.00  0.00           H
ATOM   3779 2HD2 LEU A 535      45.080  34.270  -2.870  1.00  0.00           H
ATOM   3780 3HD2 LEU A 535      43.630  35.260  -3.110  1.00  0.00           H
ATOM   3781  C   LEU A 535      44.500  36.440  -6.980  1.00  0.00           C
ATOM   3782  O   LEU A 535      44.640  36.210  -8.180  1.00  0.00           O
ATOM   3783  N   LYS A 536      45.420  37.300  -6.490  1.00  0.00           N
ATOM   3784  H   LYS A 536      45.420  37.320  -5.480  1.00  0.00           H
ATOM   3785  CA  LYS A 536      46.430  38.060  -7.220  1.00  0.00           C
ATOM   3786  HA  LYS A 536      46.170  38.190  -8.270  1.00  0.00           H
ATOM   3787  CB  LYS A 536      46.400  39.500  -6.650  1.00  0.00           C
ATOM   3788  HB1 LYS A 536      47.070  40.110  -7.260  1.00  0.00           H
ATOM   3789  HB2 LYS A 536      46.680  39.340  -5.610  1.00  0.00           H
ATOM   3790  CG  LYS A 536      44.960  40.180  -6.760  1.00  0.00           C
ATOM   3791  HG1 LYS A 536      44.240  39.610  -6.170  1.00  0.00           H
ATOM   3792  HG2 LYS A 536      44.680  40.170  -7.810  1.00  0.00           H
ATOM   3793  CD  LYS A 536      44.920  41.590  -6.100  1.00  0.00           C
ATOM   3794  HD1 LYS A 536      45.790  42.130  -6.470  1.00  0.00           H
ATOM   3795  HD2 LYS A 536      45.070  41.400  -5.040  1.00  0.00           H
ATOM   3796  CE  LYS A 536      43.590  42.270  -6.590  1.00  0.00           C
ATOM   3797  HE1 LYS A 536      42.840  41.750  -5.990  1.00  0.00           H
ATOM   3798  HE2 LYS A 536      43.450  42.130  -7.660  1.00  0.00           H
ATOM   3799  NZ  LYS A 536      43.540  43.710  -6.200  1.00  0.00           N
ATOM   3800  HZ1 LYS A 536      42.570  43.960  -6.150  1.00  0.00           H
ATOM   3801  HZ2 LYS A 536      43.910  43.800  -5.270  1.00  0.00           H
ATOM   3802  HZ3 LYS A 536      44.040  44.390  -6.760  1.00  0.00           H
ATOM   3803  C   LYS A 536      47.840  37.360  -7.140  1.00  0.00           C
ATOM   3804  O   LYS A 536      48.570  37.490  -8.120  1.00  0.00           O
ATOM   3805  N   ASN A 537      48.150  36.650  -6.120  1.00  0.00           N
ATOM   3806  H   ASN A 537      47.630  36.850  -5.280  1.00  0.00           H
ATOM   3807  CA  ASN A 537      49.410  35.820  -6.140  1.00  0.00           C
ATOM   3808  HA  ASN A 537      50.170  36.320  -6.750  1.00  0.00           H
ATOM   3809  CB  ASN A 537      50.050  35.770  -4.740  1.00  0.00           C
ATOM   3810  HB1 ASN A 537      50.870  35.060  -4.680  1.00  0.00           H
ATOM   3811  HB2 ASN A 537      49.300  35.460  -4.020  1.00  0.00           H
ATOM   3812  CG  ASN A 537      50.600  37.180  -4.350  1.00  0.00           C
ATOM   3813  OD1 ASN A 537      51.700  37.680  -4.570  1.00  0.00           O
ATOM   3814  ND2 ASN A 537      49.690  37.940  -3.740  1.00  0.00           N
ATOM   3815 1HD2 ASN A 537      48.760  37.580  -3.590  1.00  0.00           H
ATOM   3816 2HD2 ASN A 537      50.030  38.890  -3.750  1.00  0.00           H
ATOM   3817  C   ASN A 537      49.210  34.480  -6.830  1.00  0.00           C
ATOM   3818  O   ASN A 537      49.870  33.500  -6.470  1.00  0.00           O
ATOM   3819  N   LEU A 538      48.350  34.450  -7.810  1.00  0.00           N
ATOM   3820  H   LEU A 538      48.070  35.350  -8.180  1.00  0.00           H
ATOM   3821  CA  LEU A 538      47.870  33.180  -8.530  1.00  0.00           C
ATOM   3822  HA  LEU A 538      47.500  32.500  -7.770  1.00  0.00           H
ATOM   3823  CB  LEU A 538      46.640  33.570  -9.340  1.00  0.00           C
ATOM   3824  HB1 LEU A 538      45.750  33.690  -8.730  1.00  0.00           H
ATOM   3825  HB2 LEU A 538      46.440  32.600  -9.780  1.00  0.00           H
ATOM   3826  CG  LEU A 538      46.660  34.780 -10.260  1.00  0.00           C
ATOM   3827  HG  LEU A 538      46.400  35.660  -9.670  1.00  0.00           H
ATOM   3828  CD1 LEU A 538      47.930  35.080 -10.980  1.00  0.00           C
ATOM   3829 1HD1 LEU A 538      48.690  35.490 -10.320  1.00  0.00           H
ATOM   3830 2HD1 LEU A 538      48.270  34.170 -11.470  1.00  0.00           H
ATOM   3831 3HD1 LEU A 538      47.730  35.910 -11.670  1.00  0.00           H
ATOM   3832  CD2 LEU A 538      45.570  34.640 -11.300  1.00  0.00           C
ATOM   3833 1HD2 LEU A 538      45.370  35.540 -11.860  1.00  0.00           H
ATOM   3834 2HD2 LEU A 538      45.870  33.930 -12.070  1.00  0.00           H
ATOM   3835 3HD2 LEU A 538      44.660  34.150 -10.940  1.00  0.00           H
ATOM   3836  C   LEU A 538      48.970  32.510  -9.470  1.00  0.00           C
ATOM   3837  O   LEU A 538      48.760  31.480 -10.090  1.00  0.00           O
ATOM   3838  N   HIS A 539      50.150  33.140  -9.540  1.00  0.00           N
ATOM   3839  H   HIS A 539      50.100  33.910  -8.880  1.00  0.00           H
ATOM   3840  CA  HIS A 539      51.410  32.830 -10.170  1.00  0.00           C
ATOM   3841  HA  HIS A 539      51.300  31.900 -10.730  1.00  0.00           H
ATOM   3842  CB  HIS A 539      51.910  34.050 -10.990  1.00  0.00           C
ATOM   3843  HB1 HIS A 539      51.170  34.320 -11.740  1.00  0.00           H
ATOM   3844  HB2 HIS A 539      52.820  33.750 -11.500  1.00  0.00           H
ATOM   3845  CG  HIS A 539      52.400  35.230 -10.170  1.00  0.00           C
ATOM   3846  ND1 HIS A 539      51.700  35.740  -9.030  1.00  0.00           N
ATOM   3847  CE1 HIS A 539      52.410  36.810  -8.660  1.00  0.00           C
ATOM   3848  HE1 HIS A 539      52.230  37.470  -7.820  1.00  0.00           H
ATOM   3849  NE2 HIS A 539      53.480  36.970  -9.440  1.00  0.00           N
ATOM   3850  HE2 HIS A 539      54.080  37.770  -9.330  1.00  0.00           H
ATOM   3851  CD2 HIS A 539      53.510  35.980 -10.430  1.00  0.00           C
ATOM   3852  HD2 HIS A 539      54.210  35.720 -11.210  1.00  0.00           H
ATOM   3853  C   HIS A 539      52.500  32.440  -9.170  1.00  0.00           C
ATOM   3854  O   HIS A 539      53.640  32.140  -9.540  1.00  0.00           O
ATOM   3855  N   LYS A 540      52.110  32.280  -7.850  1.00  0.00           N
ATOM   3856  H   LYS A 540      51.180  32.600  -7.590  1.00  0.00           H
ATOM   3857  CA  LYS A 540      52.980  31.960  -6.710  1.00  0.00           C
ATOM   3858  HA  LYS A 540      53.910  31.580  -7.130  1.00  0.00           H
ATOM   3859  CB  LYS A 540      53.300  33.240  -5.900  1.00  0.00           C
ATOM   3860  HB1 LYS A 540      53.590  32.910  -4.910  1.00  0.00           H
ATOM   3861  HB2 LYS A 540      52.460  33.920  -5.820  1.00  0.00           H
ATOM   3862  CG  LYS A 540      54.510  33.920  -6.530  1.00  0.00           C
ATOM   3863  HG1 LYS A 540      54.250  34.150  -7.570  1.00  0.00           H
ATOM   3864  HG2 LYS A 540      55.350  33.230  -6.480  1.00  0.00           H
ATOM   3865  CD  LYS A 540      55.100  35.200  -5.840  1.00  0.00           C
ATOM   3866  HD1 LYS A 540      55.870  35.560  -6.520  1.00  0.00           H
ATOM   3867  HD2 LYS A 540      55.500  34.870  -4.880  1.00  0.00           H
ATOM   3868  CE  LYS A 540      54.080  36.290  -5.720  1.00  0.00           C
ATOM   3869  HE1 LYS A 540      53.170  35.810  -5.370  1.00  0.00           H
ATOM   3870  HE2 LYS A 540      53.930  36.860  -6.640  1.00  0.00           H
ATOM   3871  NZ  LYS A 540      54.490  37.290  -4.710  1.00  0.00           N
ATOM   3872  HZ1 LYS A 540      54.600  36.860  -3.800  1.00  0.00           H
ATOM   3873  HZ2 LYS A 540      55.330  37.730  -5.050  1.00  0.00           H
ATOM   3874  HZ3 LYS A 540      53.780  37.990  -4.580  1.00  0.00           H
ATOM   3875  C   LYS A 540      52.470  30.830  -5.800  1.00  0.00           C
ATOM   3876  O   LYS A 540      53.270  29.980  -5.430  1.00  0.00           O
ATOM   3877  N   VAL A 541      51.170  30.790  -5.440  1.00  0.00           N
ATOM   3878  H   VAL A 541      50.690  31.600  -5.790  1.00  0.00           H
ATOM   3879  CA  VAL A 541      50.540  29.700  -4.640  1.00  0.00           C
ATOM   3880  HA  VAL A 541      51.130  29.560  -3.730  1.00  0.00           H
ATOM   3881  CB  VAL A 541      49.110  30.170  -4.240  1.00  0.00           C
ATOM   3882  HB  VAL A 541      48.620  29.380  -3.680  1.00  0.00           H
ATOM   3883  CG1 VAL A 541      49.200  31.430  -3.370  1.00  0.00           C
ATOM   3884 1HG1 VAL A 541      49.490  32.300  -3.960  1.00  0.00           H
ATOM   3885 2HG1 VAL A 541      48.230  31.520  -2.870  1.00  0.00           H
ATOM   3886 3HG1 VAL A 541      49.920  31.340  -2.560  1.00  0.00           H
ATOM   3887  CG2 VAL A 541      48.250  30.230  -5.560  1.00  0.00           C
ATOM   3888 1HG2 VAL A 541      47.180  30.330  -5.370  1.00  0.00           H
ATOM   3889 2HG2 VAL A 541      48.560  31.070  -6.180  1.00  0.00           H
ATOM   3890 3HG2 VAL A 541      48.360  29.330  -6.160  1.00  0.00           H
ATOM   3891  C   VAL A 541      50.550  28.290  -5.330  1.00  0.00           C
ATOM   3892  O   VAL A 541      50.930  28.170  -6.520  1.00  0.00           O
ATOM   3893  N   SER A 542      50.340  27.200  -4.590  1.00  0.00           N
ATOM   3894  H   SER A 542      49.780  27.350  -3.760  1.00  0.00           H
ATOM   3895  CA  SER A 542      50.510  25.830  -5.000  1.00  0.00           C
ATOM   3896  HA  SER A 542      51.260  25.770  -5.790  1.00  0.00           H
ATOM   3897  CB  SER A 542      50.900  25.020  -3.770  1.00  0.00           C
ATOM   3898  HB1 SER A 542      51.780  25.490  -3.340  1.00  0.00           H
ATOM   3899  HB2 SER A 542      51.060  23.950  -3.890  1.00  0.00           H
ATOM   3900  OG  SER A 542      49.840  25.140  -2.860  1.00  0.00           O
ATOM   3901  HG  SER A 542      50.220  25.650  -2.140  1.00  0.00           H
ATOM   3902  C   SER A 542      49.160  25.340  -5.540  1.00  0.00           C
ATOM   3903  O   SER A 542      48.100  25.890  -5.170  1.00  0.00           O
ATOM   3904  N   PRO A 543      49.180  24.230  -6.330  1.00  0.00           N
ATOM   3905  CD  PRO A 543      50.360  23.470  -6.840  1.00  0.00           C
ATOM   3906  HD1 PRO A 543      51.150  23.590  -6.090  1.00  0.00           H
ATOM   3907  HD2 PRO A 543      50.690  23.930  -7.770  1.00  0.00           H
ATOM   3908  CG  PRO A 543      49.940  22.010  -7.110  1.00  0.00           C
ATOM   3909  HG1 PRO A 543      49.820  21.470  -6.170  1.00  0.00           H
ATOM   3910  HG2 PRO A 543      50.540  21.520  -7.880  1.00  0.00           H
ATOM   3911  CB  PRO A 543      48.520  22.240  -7.600  1.00  0.00           C
ATOM   3912  HB1 PRO A 543      47.980  21.320  -7.390  1.00  0.00           H
ATOM   3913  HB2 PRO A 543      48.610  22.510  -8.650  1.00  0.00           H
ATOM   3914  CA  PRO A 543      48.000  23.440  -6.780  1.00  0.00           C
ATOM   3915  HA  PRO A 543      47.450  24.000  -7.530  1.00  0.00           H
ATOM   3916  C   PRO A 543      47.000  23.060  -5.650  1.00  0.00           C
ATOM   3917  O   PRO A 543      45.840  23.160  -6.010  1.00  0.00           O
ATOM   3918  N   SER A 544      47.440  22.610  -4.480  1.00  0.00           N
ATOM   3919  H   SER A 544      48.420  22.550  -4.250  1.00  0.00           H
ATOM   3920  CA  SER A 544      46.430  22.370  -3.340  1.00  0.00           C
ATOM   3921  HA  SER A 544      45.680  21.720  -3.780  1.00  0.00           H
ATOM   3922  CB  SER A 544      47.110  21.440  -2.310  1.00  0.00           C
ATOM   3923  HB1 SER A 544      47.550  20.500  -2.660  1.00  0.00           H
ATOM   3924  HB2 SER A 544      46.430  21.300  -1.470  1.00  0.00           H
ATOM   3925  OG  SER A 544      48.270  22.100  -1.770  1.00  0.00           O
ATOM   3926  HG  SER A 544      48.460  21.570  -0.990  1.00  0.00           H
ATOM   3927  C   SER A 544      45.730  23.620  -2.830  1.00  0.00           C
ATOM   3928  O   SER A 544      44.520  23.570  -2.600  1.00  0.00           O
ATOM   3929  N   LEU A 545      46.450  24.700  -2.650  1.00  0.00           N
ATOM   3930  H   LEU A 545      47.450  24.630  -2.810  1.00  0.00           H
ATOM   3931  CA  LEU A 545      45.930  25.970  -2.100  1.00  0.00           C
ATOM   3932  HA  LEU A 545      45.560  25.810  -1.080  1.00  0.00           H
ATOM   3933  CB  LEU A 545      47.120  26.930  -1.920  1.00  0.00           C
ATOM   3934  HB1 LEU A 545      47.480  27.200  -2.910  1.00  0.00           H
ATOM   3935  HB2 LEU A 545      47.930  26.510  -1.330  1.00  0.00           H
ATOM   3936  CG  LEU A 545      46.720  28.200  -1.150  1.00  0.00           C
ATOM   3937  HG  LEU A 545      46.050  27.860  -0.350  1.00  0.00           H
ATOM   3938  CD1 LEU A 545      47.880  28.970  -0.470  1.00  0.00           C
ATOM   3939 1HD1 LEU A 545      48.640  29.240  -1.200  1.00  0.00           H
ATOM   3940 2HD1 LEU A 545      47.610  29.890   0.040  1.00  0.00           H
ATOM   3941 3HD1 LEU A 545      48.270  28.360   0.350  1.00  0.00           H
ATOM   3942  CD2 LEU A 545      46.050  29.270  -2.020  1.00  0.00           C
ATOM   3943 1HD2 LEU A 545      44.980  29.070  -2.040  1.00  0.00           H
ATOM   3944 2HD2 LEU A 545      46.190  30.250  -1.580  1.00  0.00           H
ATOM   3945 3HD2 LEU A 545      46.490  29.270  -3.020  1.00  0.00           H
ATOM   3946  C   LEU A 545      44.740  26.470  -2.990  1.00  0.00           C
ATOM   3947  O   LEU A 545      43.650  26.870  -2.470  1.00  0.00           O
ATOM   3948  N   LYS A 546      44.970  26.450  -4.320  1.00  0.00           N
ATOM   3949  H   LYS A 546      45.860  26.140  -4.690  1.00  0.00           H
ATOM   3950  CA  LYS A 546      43.930  26.870  -5.250  1.00  0.00           C
ATOM   3951  HA  LYS A 546      43.550  27.850  -4.950  1.00  0.00           H
ATOM   3952  CB  LYS A 546      44.510  26.960  -6.650  1.00  0.00           C
ATOM   3953  HB1 LYS A 546      44.860  25.960  -6.900  1.00  0.00           H
ATOM   3954  HB2 LYS A 546      45.280  27.720  -6.760  1.00  0.00           H
ATOM   3955  CG  LYS A 546      43.410  27.200  -7.700  1.00  0.00           C
ATOM   3956  HG1 LYS A 546      42.910  28.100  -7.340  1.00  0.00           H
ATOM   3957  HG2 LYS A 546      42.660  26.420  -7.810  1.00  0.00           H
ATOM   3958  CD  LYS A 546      43.770  27.530  -9.140  1.00  0.00           C
ATOM   3959  HD1 LYS A 546      44.180  26.700  -9.710  1.00  0.00           H
ATOM   3960  HD2 LYS A 546      44.590  28.230  -8.970  1.00  0.00           H
ATOM   3961  CE  LYS A 546      42.540  28.180  -9.860  1.00  0.00           C
ATOM   3962  HE1 LYS A 546      42.820  28.650 -10.800  1.00  0.00           H
ATOM   3963  HE2 LYS A 546      42.210  28.950  -9.160  1.00  0.00           H
ATOM   3964  NZ  LYS A 546      41.480  27.290 -10.140  1.00  0.00           N
ATOM   3965  HZ1 LYS A 546      40.650  27.850 -10.240  1.00  0.00           H
ATOM   3966  HZ2 LYS A 546      41.690  26.850 -11.020  1.00  0.00           H
ATOM   3967  HZ3 LYS A 546      41.280  26.650  -9.380  1.00  0.00           H
ATOM   3968  C   LYS A 546      42.740  25.880  -5.140  1.00  0.00           C
ATOM   3969  O   LYS A 546      41.620  26.340  -4.870  1.00  0.00           O
ATOM   3970  N   GLY A 547      42.990  24.550  -5.320  1.00  0.00           N
ATOM   3971  H   GLY A 547      43.970  24.330  -5.380  1.00  0.00           H
ATOM   3972  CA  GLY A 547      42.060  23.470  -5.090  1.00  0.00           C
ATOM   3973  HA1 GLY A 547      42.680  22.580  -5.010  1.00  0.00           H
ATOM   3974  HA2 GLY A 547      41.430  23.330  -5.960  1.00  0.00           H
ATOM   3975  C   GLY A 547      41.170  23.470  -3.800  1.00  0.00           C
ATOM   3976  O   GLY A 547      40.080  22.930  -3.700  1.00  0.00           O
ATOM   3977  N   PHE A 548      41.890  23.960  -2.800  1.00  0.00           N
ATOM   3978  H   PHE A 548      42.890  24.040  -2.920  1.00  0.00           H
ATOM   3979  CA  PHE A 548      41.250  24.110  -1.460  1.00  0.00           C
ATOM   3980  HA  PHE A 548      40.570  23.270  -1.320  1.00  0.00           H
ATOM   3981  CB  PHE A 548      42.410  24.170  -0.400  1.00  0.00           C
ATOM   3982  HB1 PHE A 548      43.090  24.990  -0.630  1.00  0.00           H
ATOM   3983  HB2 PHE A 548      42.940  23.220  -0.490  1.00  0.00           H
ATOM   3984  CG  PHE A 548      41.880  24.440   1.020  1.00  0.00           C
ATOM   3985  CD1 PHE A 548      41.170  23.440   1.760  1.00  0.00           C
ATOM   3986  HD1 PHE A 548      40.830  22.510   1.330  1.00  0.00           H
ATOM   3987  CE1 PHE A 548      40.890  23.710   3.150  1.00  0.00           C
ATOM   3988  HE1 PHE A 548      40.410  23.020   3.840  1.00  0.00           H
ATOM   3989  CZ  PHE A 548      41.280  24.920   3.750  1.00  0.00           C
ATOM   3990  HZ  PHE A 548      40.980  25.070   4.780  1.00  0.00           H
ATOM   3991  CE2 PHE A 548      41.900  25.940   3.020  1.00  0.00           C
ATOM   3992  HE2 PHE A 548      42.250  26.830   3.530  1.00  0.00           H
ATOM   3993  CD2 PHE A 548      42.190  25.700   1.680  1.00  0.00           C
ATOM   3994  HD2 PHE A 548      42.710  26.440   1.090  1.00  0.00           H
ATOM   3995  C   PHE A 548      40.260  25.300  -1.380  1.00  0.00           C
ATOM   3996  O   PHE A 548      39.060  25.130  -1.090  1.00  0.00           O
ATOM   3997  N   LEU A 549      40.780  26.430  -1.870  1.00  0.00           N
ATOM   3998  H   LEU A 549      41.660  26.380  -2.350  1.00  0.00           H
ATOM   3999  CA  LEU A 549      39.980  27.650  -2.020  1.00  0.00           C
ATOM   4000  HA  LEU A 549      39.450  27.910  -1.110  1.00  0.00           H
ATOM   4001  CB  LEU A 549      40.930  28.770  -2.410  1.00  0.00           C
ATOM   4002  HB1 LEU A 549      41.280  28.600  -3.420  1.00  0.00           H
ATOM   4003  HB2 LEU A 549      41.790  28.690  -1.750  1.00  0.00           H
ATOM   4004  CG  LEU A 549      40.430  30.200  -2.420  1.00  0.00           C
ATOM   4005  HG  LEU A 549      39.650  30.360  -3.160  1.00  0.00           H
ATOM   4006  CD1 LEU A 549      39.910  30.590  -1.020  1.00  0.00           C
ATOM   4007 1HD1 LEU A 549      39.700  31.660  -1.000  1.00  0.00           H
ATOM   4008 2HD1 LEU A 549      39.040  29.960  -0.800  1.00  0.00           H
ATOM   4009 3HD1 LEU A 549      40.690  30.310  -0.320  1.00  0.00           H
ATOM   4010  CD2 LEU A 549      41.610  31.140  -2.710  1.00  0.00           C
ATOM   4011 1HD2 LEU A 549      42.300  31.170  -1.870  1.00  0.00           H
ATOM   4012 2HD2 LEU A 549      42.060  30.840  -3.660  1.00  0.00           H
ATOM   4013 3HD2 LEU A 549      41.210  32.150  -2.790  1.00  0.00           H
ATOM   4014  C   LEU A 549      38.780  27.520  -2.990  1.00  0.00           C
ATOM   4015  O   LEU A 549      37.730  28.130  -2.830  1.00  0.00           O
ATOM   4016  N   ASP A 550      38.900  26.630  -3.950  1.00  0.00           N
ATOM   4017  H   ASP A 550      39.840  26.290  -4.080  1.00  0.00           H
ATOM   4018  CA  ASP A 550      37.840  26.220  -4.880  1.00  0.00           C
ATOM   4019  HA  ASP A 550      37.430  27.190  -5.190  1.00  0.00           H
ATOM   4020  CB  ASP A 550      38.580  25.450  -6.050  1.00  0.00           C
ATOM   4021  HB1 ASP A 550      37.940  24.690  -6.490  1.00  0.00           H
ATOM   4022  HB2 ASP A 550      39.430  24.890  -5.660  1.00  0.00           H
ATOM   4023  CG  ASP A 550      39.270  26.350  -7.100  1.00  0.00           C
ATOM   4024  OD1 ASP A 550      39.850  25.820  -8.070  1.00  0.00           O
ATOM   4025  OD2 ASP A 550      39.370  27.610  -6.980  1.00  0.00           O
ATOM   4026  C   ASP A 550      36.630  25.370  -4.310  1.00  0.00           C
ATOM   4027  O   ASP A 550      35.700  25.070  -5.040  1.00  0.00           O
ATOM   4028  N   ARG A 551      36.780  24.900  -3.070  1.00  0.00           N
ATOM   4029  H   ARG A 551      37.590  25.330  -2.640  1.00  0.00           H
ATOM   4030  CA  ARG A 551      35.810  24.220  -2.170  1.00  0.00           C
ATOM   4031  HA  ARG A 551      34.970  23.820  -2.730  1.00  0.00           H
ATOM   4032  CB  ARG A 551      36.510  23.090  -1.420  1.00  0.00           C
ATOM   4033  HB1 ARG A 551      35.850  22.670  -0.670  1.00  0.00           H
ATOM   4034  HB2 ARG A 551      37.340  23.500  -0.850  1.00  0.00           H
ATOM   4035  CG  ARG A 551      37.090  21.980  -2.290  1.00  0.00           C
ATOM   4036  HG1 ARG A 551      37.620  21.300  -1.620  1.00  0.00           H
ATOM   4037  HG2 ARG A 551      37.740  22.440  -3.040  1.00  0.00           H
ATOM   4038  CD  ARG A 551      35.990  21.220  -3.020  1.00  0.00           C
ATOM   4039  HD1 ARG A 551      36.480  20.420  -3.580  1.00  0.00           H
ATOM   4040  HD2 ARG A 551      35.400  21.900  -3.640  1.00  0.00           H
ATOM   4041  NE  ARG A 551      35.110  20.410  -2.190  1.00  0.00           N
ATOM   4042  HE  ARG A 551      35.570  19.960  -1.410  1.00  0.00           H
ATOM   4043  CZ  ARG A 551      33.780  20.360  -2.150  1.00  0.00           C
ATOM   4044  NH1 ARG A 551      33.010  21.000  -2.940  1.00  0.00           N
ATOM   4045 1HH1 ARG A 551      33.410  21.680  -3.570  1.00  0.00           H
ATOM   4046 2HH1 ARG A 551      32.050  20.830  -2.670  1.00  0.00           H
ATOM   4047  NH2 ARG A 551      33.150  19.670  -1.250  1.00  0.00           N
ATOM   4048 1HH2 ARG A 551      33.610  19.030  -0.610  1.00  0.00           H
ATOM   4049 2HH2 ARG A 551      32.150  19.570  -1.320  1.00  0.00           H
ATOM   4050  C   ARG A 551      35.190  25.190  -1.140  1.00  0.00           C
ATOM   4051  O   ARG A 551      34.020  25.090  -0.720  1.00  0.00           O
ATOM   4052  N   LEU A 552      35.990  26.190  -0.710  1.00  0.00           N
ATOM   4053  H   LEU A 552      36.940  26.080  -1.030  1.00  0.00           H
ATOM   4054  CA  LEU A 552      35.640  27.340   0.140  1.00  0.00           C
ATOM   4055  HA  LEU A 552      34.920  27.030   0.900  1.00  0.00           H
ATOM   4056  CB  LEU A 552      36.890  28.050   0.750  1.00  0.00           C
ATOM   4057  HB1 LEU A 552      36.600  28.910   1.330  1.00  0.00           H
ATOM   4058  HB2 LEU A 552      37.520  28.420  -0.060  1.00  0.00           H
ATOM   4059  CG  LEU A 552      37.810  27.110   1.650  1.00  0.00           C
ATOM   4060  HG  LEU A 552      38.050  26.170   1.140  1.00  0.00           H
ATOM   4061  CD1 LEU A 552      39.140  27.840   1.860  1.00  0.00           C
ATOM   4062 1HD1 LEU A 552      39.660  28.070   0.930  1.00  0.00           H
ATOM   4063 2HD1 LEU A 552      38.890  28.790   2.330  1.00  0.00           H
ATOM   4064 3HD1 LEU A 552      39.820  27.190   2.420  1.00  0.00           H
ATOM   4065  CD2 LEU A 552      37.070  26.910   2.960  1.00  0.00           C
ATOM   4066 1HD2 LEU A 552      36.090  26.470   2.760  1.00  0.00           H
ATOM   4067 2HD2 LEU A 552      37.750  26.270   3.520  1.00  0.00           H
ATOM   4068 3HD2 LEU A 552      36.910  27.900   3.380  1.00  0.00           H
ATOM   4069  C   LEU A 552      34.710  28.280  -0.680  1.00  0.00           C
ATOM   4070  O   LEU A 552      33.550  28.410  -0.300  1.00  0.00           O
ATOM   4071  N   LEU A 553      35.160  28.870  -1.870  1.00  0.00           N
ATOM   4072  H   LEU A 553      36.070  28.700  -2.270  1.00  0.00           H
ATOM   4073  CA  LEU A 553      34.360  29.830  -2.620  1.00  0.00           C
ATOM   4074  HA  LEU A 553      33.720  30.450  -1.990  1.00  0.00           H
ATOM   4075  CB  LEU A 553      35.270  30.790  -3.320  1.00  0.00           C
ATOM   4076  HB1 LEU A 553      34.770  31.480  -4.000  1.00  0.00           H
ATOM   4077  HB2 LEU A 553      35.850  30.240  -4.050  1.00  0.00           H
ATOM   4078  CG  LEU A 553      36.250  31.610  -2.410  1.00  0.00           C
ATOM   4079  HG  LEU A 553      36.920  31.020  -1.790  1.00  0.00           H
ATOM   4080  CD1 LEU A 553      37.130  32.430  -3.270  1.00  0.00           C
ATOM   4081 1HD1 LEU A 553      37.750  33.120  -2.710  1.00  0.00           H
ATOM   4082 2HD1 LEU A 553      37.800  31.800  -3.860  1.00  0.00           H
ATOM   4083 3HD1 LEU A 553      36.520  33.030  -3.950  1.00  0.00           H
ATOM   4084  CD2 LEU A 553      35.460  32.600  -1.490  1.00  0.00           C
ATOM   4085 1HD2 LEU A 553      34.730  32.080  -0.860  1.00  0.00           H
ATOM   4086 2HD2 LEU A 553      36.140  33.020  -0.750  1.00  0.00           H
ATOM   4087 3HD2 LEU A 553      34.870  33.320  -2.050  1.00  0.00           H
ATOM   4088  C   LEU A 553      33.380  29.200  -3.590  1.00  0.00           C
ATOM   4089  O   LEU A 553      33.280  29.750  -4.710  1.00  0.00           O
ATOM   4090  N   VAL A 554      32.610  28.170  -3.260  1.00  0.00           N
ATOM   4091  H   VAL A 554      32.710  27.830  -2.310  1.00  0.00           H
ATOM   4092  CA  VAL A 554      31.550  27.650  -4.120  1.00  0.00           C
ATOM   4093  HA  VAL A 554      31.930  27.530  -5.140  1.00  0.00           H
ATOM   4094  CB  VAL A 554      31.170  26.200  -3.730  1.00  0.00           C
ATOM   4095  HB  VAL A 554      30.890  26.100  -2.680  1.00  0.00           H
ATOM   4096  CG1 VAL A 554      30.030  25.730  -4.600  1.00  0.00           C
ATOM   4097 1HG1 VAL A 554      29.130  26.280  -4.310  1.00  0.00           H
ATOM   4098 2HG1 VAL A 554      30.260  25.770  -5.660  1.00  0.00           H
ATOM   4099 3HG1 VAL A 554      29.830  24.680  -4.390  1.00  0.00           H
ATOM   4100  CG2 VAL A 554      32.310  25.220  -4.010  1.00  0.00           C
ATOM   4101 1HG2 VAL A 554      32.550  25.150  -5.070  1.00  0.00           H
ATOM   4102 2HG2 VAL A 554      33.240  25.550  -3.550  1.00  0.00           H
ATOM   4103 3HG2 VAL A 554      32.070  24.230  -3.610  1.00  0.00           H
ATOM   4104  C   VAL A 554      30.370  28.660  -4.050  1.00  0.00           C
ATOM   4105  O   VAL A 554      29.970  28.930  -2.940  1.00  0.00           O
ATOM   4106  N   ARG A 555      29.830  29.180  -5.160  1.00  0.00           N
ATOM   4107  H   ARG A 555      30.270  29.010  -6.060  1.00  0.00           H
ATOM   4108  CA  ARG A 555      28.610  30.020  -5.140  1.00  0.00           C
ATOM   4109  HA  ARG A 555      28.860  30.890  -4.550  1.00  0.00           H
ATOM   4110  CB  ARG A 555      28.490  30.600  -6.560  1.00  0.00           C
ATOM   4111  HB1 ARG A 555      28.560  29.790  -7.290  1.00  0.00           H
ATOM   4112  HB2 ARG A 555      29.330  31.260  -6.780  1.00  0.00           H
ATOM   4113  CG  ARG A 555      27.260  31.470  -6.780  1.00  0.00           C
ATOM   4114  HG1 ARG A 555      26.390  30.820  -6.850  1.00  0.00           H
ATOM   4115  HG2 ARG A 555      27.270  32.080  -7.680  1.00  0.00           H
ATOM   4116  CD  ARG A 555      27.090  32.510  -5.720  1.00  0.00           C
ATOM   4117  HD1 ARG A 555      28.070  32.890  -5.460  1.00  0.00           H
ATOM   4118  HD2 ARG A 555      26.680  32.090  -4.810  1.00  0.00           H
ATOM   4119  NE  ARG A 555      26.280  33.700  -6.210  1.00  0.00           N
ATOM   4120  HE  ARG A 555      26.610  34.290  -6.960  1.00  0.00           H
ATOM   4121  CZ  ARG A 555      25.020  34.070  -5.880  1.00  0.00           C
ATOM   4122  NH1 ARG A 555      24.260  33.340  -5.090  1.00  0.00           N
ATOM   4123 1HH1 ARG A 555      24.560  32.520  -4.600  1.00  0.00           H
ATOM   4124 2HH1 ARG A 555      23.330  33.690  -4.880  1.00  0.00           H
ATOM   4125  NH2 ARG A 555      24.400  35.030  -6.470  1.00  0.00           N
ATOM   4126 1HH2 ARG A 555      24.770  35.590  -7.220  1.00  0.00           H
ATOM   4127 2HH2 ARG A 555      23.410  35.070  -6.290  1.00  0.00           H
ATOM   4128  C   ARG A 555      27.410  29.270  -4.610  1.00  0.00           C
ATOM   4129  O   ARG A 555      26.890  29.680  -3.580  1.00  0.00           O
ATOM   4130  N   ASP A 556      26.910  28.240  -5.320  1.00  0.00           N
ATOM   4131  H   ASP A 556      27.270  28.110  -6.260  1.00  0.00           H
ATOM   4132  CA  ASP A 556      25.860  27.340  -4.800  1.00  0.00           C
ATOM   4133  HA  ASP A 556      24.870  27.790  -4.720  1.00  0.00           H
ATOM   4134  CB  ASP A 556      25.650  26.230  -5.800  1.00  0.00           C
ATOM   4135  HB1 ASP A 556      26.610  25.730  -5.950  1.00  0.00           H
ATOM   4136  HB2 ASP A 556      25.300  26.560  -6.780  1.00  0.00           H
ATOM   4137  CG  ASP A 556      24.690  25.140  -5.330  1.00  0.00           C
ATOM   4138  OD1 ASP A 556      24.770  23.960  -5.640  1.00  0.00           O
ATOM   4139  OD2 ASP A 556      23.710  25.420  -4.590  1.00  0.00           O
ATOM   4140  C   ASP A 556      26.160  26.700  -3.440  1.00  0.00           C
ATOM   4141  O   ASP A 556      26.870  25.710  -3.380  1.00  0.00           O
ATOM   4142  N   PRO A 557      25.570  27.180  -2.330  1.00  0.00           N
ATOM   4143  CD  PRO A 557      24.670  28.310  -2.210  1.00  0.00           C
ATOM   4144  HD1 PRO A 557      24.040  28.500  -3.080  1.00  0.00           H
ATOM   4145  HD2 PRO A 557      25.300  29.200  -2.140  1.00  0.00           H
ATOM   4146  CG  PRO A 557      23.900  28.140  -0.980  1.00  0.00           C
ATOM   4147  HG1 PRO A 557      23.090  27.430  -1.160  1.00  0.00           H
ATOM   4148  HG2 PRO A 557      23.470  29.050  -0.550  1.00  0.00           H
ATOM   4149  CB  PRO A 557      24.930  27.410  -0.060  1.00  0.00           C
ATOM   4150  HB1 PRO A 557      24.430  26.860   0.740  1.00  0.00           H
ATOM   4151  HB2 PRO A 557      25.480  28.240   0.370  1.00  0.00           H
ATOM   4152  CA  PRO A 557      25.670  26.530  -1.060  1.00  0.00           C
ATOM   4153  HA  PRO A 557      26.700  26.600  -0.700  1.00  0.00           H
ATOM   4154  C   PRO A 557      25.220  25.020  -0.990  1.00  0.00           C
ATOM   4155  O   PRO A 557      25.620  24.420   0.010  1.00  0.00           O
ATOM   4156  N   ALA A 558      24.430  24.420  -1.900  1.00  0.00           N
ATOM   4157  H   ALA A 558      24.150  24.940  -2.720  1.00  0.00           H
ATOM   4158  CA  ALA A 558      24.370  22.960  -1.890  1.00  0.00           C
ATOM   4159  HA  ALA A 558      24.200  22.670  -0.850  1.00  0.00           H
ATOM   4160  CB  ALA A 558      23.120  22.540  -2.640  1.00  0.00           C
ATOM   4161  HB1 ALA A 558      23.180  22.960  -3.650  1.00  0.00           H
ATOM   4162  HB2 ALA A 558      23.050  21.470  -2.810  1.00  0.00           H
ATOM   4163  HB3 ALA A 558      22.230  22.900  -2.130  1.00  0.00           H
ATOM   4164  C   ALA A 558      25.630  22.280  -2.460  1.00  0.00           C
ATOM   4165  O   ALA A 558      25.740  21.100  -2.160  1.00  0.00           O
ATOM   4166  N   GLN A 559      26.530  22.960  -3.220  1.00  0.00           N
ATOM   4167  H   GLN A 559      26.240  23.850  -3.590  1.00  0.00           H
ATOM   4168  CA  GLN A 559      27.780  22.440  -3.760  1.00  0.00           C
ATOM   4169  HA  GLN A 559      27.690  21.370  -3.920  1.00  0.00           H
ATOM   4170  CB  GLN A 559      27.890  22.970  -5.230  1.00  0.00           C
ATOM   4171  HB1 GLN A 559      27.870  24.060  -5.210  1.00  0.00           H
ATOM   4172  HB2 GLN A 559      27.080  22.690  -5.900  1.00  0.00           H
ATOM   4173  CG  GLN A 559      29.130  22.580  -5.990  1.00  0.00           C
ATOM   4174  HG1 GLN A 559      28.990  21.540  -6.310  1.00  0.00           H
ATOM   4175  HG2 GLN A 559      30.030  22.730  -5.410  1.00  0.00           H
ATOM   4176  CD  GLN A 559      29.560  23.380  -7.260  1.00  0.00           C
ATOM   4177  OE1 GLN A 559      30.740  23.700  -7.490  1.00  0.00           O
ATOM   4178  NE2 GLN A 559      28.620  23.890  -8.010  1.00  0.00           N
ATOM   4179 1HE2 GLN A 559      27.640  23.920  -7.800  1.00  0.00           H
ATOM   4180 2HE2 GLN A 559      28.910  24.460  -8.790  1.00  0.00           H
ATOM   4181  C   GLN A 559      28.940  22.660  -2.760  1.00  0.00           C
ATOM   4182  O   GLN A 559      29.950  21.920  -2.790  1.00  0.00           O
ATOM   4183  N   ARG A 560      28.730  23.690  -1.890  1.00  0.00           N
ATOM   4184  H   ARG A 560      27.860  24.200  -1.920  1.00  0.00           H
ATOM   4185  CA  ARG A 560      29.690  24.110  -0.790  1.00  0.00           C
ATOM   4186  HA  ARG A 560      30.660  24.180  -1.280  1.00  0.00           H
ATOM   4187  CB  ARG A 560      29.340  25.540  -0.310  1.00  0.00           C
ATOM   4188  HB1 ARG A 560      28.580  25.460   0.470  1.00  0.00           H
ATOM   4189  HB2 ARG A 560      28.900  26.080  -1.150  1.00  0.00           H
ATOM   4190  CG  ARG A 560      30.530  26.340   0.220  1.00  0.00           C
ATOM   4191  HG1 ARG A 560      31.190  26.470  -0.640  1.00  0.00           H
ATOM   4192  HG2 ARG A 560      31.060  25.770   0.990  1.00  0.00           H
ATOM   4193  CD  ARG A 560      30.040  27.670   0.890  1.00  0.00           C
ATOM   4194  HD1 ARG A 560      30.930  28.230   1.160  1.00  0.00           H
ATOM   4195  HD2 ARG A 560      29.470  27.390   1.770  1.00  0.00           H
ATOM   4196  NE  ARG A 560      29.290  28.460  -0.010  1.00  0.00           N
ATOM   4197  HE  ARG A 560      29.730  28.570  -0.920  1.00  0.00           H
ATOM   4198  CZ  ARG A 560      28.330  29.350   0.210  1.00  0.00           C
ATOM   4199  NH1 ARG A 560      27.900  29.710   1.350  1.00  0.00           N
ATOM   4200 1HH1 ARG A 560      28.440  29.570   2.190  1.00  0.00           H
ATOM   4201 2HH1 ARG A 560      27.110  30.330   1.320  1.00  0.00           H
ATOM   4202  NH2 ARG A 560      27.760  29.910  -0.790  1.00  0.00           N
ATOM   4203 1HH2 ARG A 560      28.040  29.640  -1.710  1.00  0.00           H
ATOM   4204 2HH2 ARG A 560      26.940  30.470  -0.610  1.00  0.00           H
ATOM   4205  C   ARG A 560      29.820  23.110   0.310  1.00  0.00           C
ATOM   4206  O   ARG A 560      28.870  22.520   0.820  1.00  0.00           O
ATOM   4207  N   ALA A 561      31.060  22.930   0.680  1.00  0.00           N
ATOM   4208  H   ALA A 561      31.640  23.700   0.370  1.00  0.00           H
ATOM   4209  CA  ALA A 561      31.570  21.960   1.600  1.00  0.00           C
ATOM   4210  HA  ALA A 561      31.150  20.980   1.380  1.00  0.00           H
ATOM   4211  CB  ALA A 561      33.130  21.850   1.390  1.00  0.00           C
ATOM   4212  HB1 ALA A 561      33.380  21.660   0.340  1.00  0.00           H
ATOM   4213  HB2 ALA A 561      33.600  22.800   1.650  1.00  0.00           H
ATOM   4214  HB3 ALA A 561      33.420  21.020   2.030  1.00  0.00           H
ATOM   4215  C   ALA A 561      31.200  22.260   3.070  1.00  0.00           C
ATOM   4216  O   ALA A 561      30.650  23.300   3.410  1.00  0.00           O
ATOM   4217  N   THR A 562      31.480  21.320   3.910  1.00  0.00           N
ATOM   4218  H   THR A 562      31.640  20.410   3.490  1.00  0.00           H
ATOM   4219  CA  THR A 562      31.410  21.350   5.360  1.00  0.00           C
ATOM   4220  HA  THR A 562      30.890  22.250   5.690  1.00  0.00           H
ATOM   4221  CB  THR A 562      30.560  20.250   5.960  1.00  0.00           C
ATOM   4222  HB  THR A 562      30.700  20.270   7.040  1.00  0.00           H
ATOM   4223  CG2 THR A 562      29.100  20.250   5.590  1.00  0.00           C
ATOM   4224 1HG2 THR A 562      28.490  19.480   6.060  1.00  0.00           H
ATOM   4225 2HG2 THR A 562      28.760  21.270   5.780  1.00  0.00           H
ATOM   4226 3HG2 THR A 562      29.050  20.180   4.510  1.00  0.00           H
ATOM   4227  OG1 THR A 562      31.130  19.020   5.680  1.00  0.00           O
ATOM   4228  HG1 THR A 562      30.800  18.800   4.810  1.00  0.00           H
ATOM   4229  C   THR A 562      32.840  21.550   6.020  1.00  0.00           C
ATOM   4230  O   THR A 562      33.840  21.100   5.550  1.00  0.00           O
ATOM   4231  N   ALA A 563      32.850  22.040   7.240  1.00  0.00           N
ATOM   4232  H   ALA A 563      31.930  22.150   7.660  1.00  0.00           H
ATOM   4233  CA  ALA A 563      34.070  22.120   8.070  1.00  0.00           C
ATOM   4234  HA  ALA A 563      34.810  22.760   7.590  1.00  0.00           H
ATOM   4235  CB  ALA A 563      33.710  22.810   9.340  1.00  0.00           C
ATOM   4236  HB1 ALA A 563      32.960  22.240   9.910  1.00  0.00           H
ATOM   4237  HB2 ALA A 563      34.580  22.700   9.990  1.00  0.00           H
ATOM   4238  HB3 ALA A 563      33.370  23.830   9.200  1.00  0.00           H
ATOM   4239  C   ALA A 563      34.780  20.810   8.350  1.00  0.00           C
ATOM   4240  O   ALA A 563      35.980  20.640   8.140  1.00  0.00           O
ATOM   4241  N   ALA A 564      33.910  19.780   8.510  1.00  0.00           N
ATOM   4242  H   ALA A 564      32.930  20.010   8.590  1.00  0.00           H
ATOM   4243  CA  ALA A 564      34.490  18.450   8.830  1.00  0.00           C
ATOM   4244  HA  ALA A 564      35.330  18.570   9.510  1.00  0.00           H
ATOM   4245  CB  ALA A 564      33.480  17.700   9.690  1.00  0.00           C
ATOM   4246  HB1 ALA A 564      32.660  17.620   8.980  1.00  0.00           H
ATOM   4247  HB2 ALA A 564      33.930  16.750   9.980  1.00  0.00           H
ATOM   4248  HB3 ALA A 564      33.230  18.270  10.590  1.00  0.00           H
ATOM   4249  C   ALA A 564      35.000  17.640   7.590  1.00  0.00           C
ATOM   4250  O   ALA A 564      35.770  16.680   7.760  1.00  0.00           O
ATOM   4251  N   GLU A 565      34.760  18.070   6.390  1.00  0.00           N
ATOM   4252  H   GLU A 565      34.170  18.890   6.380  1.00  0.00           H
ATOM   4253  CA  GLU A 565      35.430  17.600   5.150  1.00  0.00           C
ATOM   4254  HA  GLU A 565      35.830  16.590   5.260  1.00  0.00           H
ATOM   4255  CB  GLU A 565      34.480  17.720   3.940  1.00  0.00           C
ATOM   4256  HB1 GLU A 565      34.290  18.800   3.880  1.00  0.00           H
ATOM   4257  HB2 GLU A 565      33.510  17.290   4.220  1.00  0.00           H
ATOM   4258  CG  GLU A 565      34.920  17.100   2.580  1.00  0.00           C
ATOM   4259  HG1 GLU A 565      35.150  16.050   2.780  1.00  0.00           H
ATOM   4260  HG2 GLU A 565      35.810  17.660   2.300  1.00  0.00           H
ATOM   4261  CD  GLU A 565      33.870  17.260   1.460  1.00  0.00           C
ATOM   4262  OE1 GLU A 565      32.740  16.680   1.610  1.00  0.00           O
ATOM   4263  OE2 GLU A 565      34.190  17.780   0.410  1.00  0.00           O
ATOM   4264  C   GLU A 565      36.640  18.380   4.830  1.00  0.00           C
ATOM   4265  O   GLU A 565      37.700  17.870   4.370  1.00  0.00           O
ATOM   4266  N   LEU A 566      36.570  19.690   5.020  1.00  0.00           N
ATOM   4267  H   LEU A 566      35.720  20.110   5.360  1.00  0.00           H
ATOM   4268  CA  LEU A 566      37.680  20.620   4.790  1.00  0.00           C
ATOM   4269  HA  LEU A 566      38.120  20.430   3.820  1.00  0.00           H
ATOM   4270  CB  LEU A 566      37.190  22.070   4.990  1.00  0.00           C
ATOM   4271  HB1 LEU A 566      38.010  22.780   4.910  1.00  0.00           H
ATOM   4272  HB2 LEU A 566      36.670  22.210   5.940  1.00  0.00           H
ATOM   4273  CG  LEU A 566      36.330  22.420   3.770  1.00  0.00           C
ATOM   4274  HG  LEU A 566      35.460  21.770   3.650  1.00  0.00           H
ATOM   4275  CD1 LEU A 566      35.870  23.830   4.060  1.00  0.00           C
ATOM   4276 1HD1 LEU A 566      35.550  24.410   3.190  1.00  0.00           H
ATOM   4277 2HD1 LEU A 566      35.010  23.810   4.720  1.00  0.00           H
ATOM   4278 3HD1 LEU A 566      36.540  24.500   4.610  1.00  0.00           H
ATOM   4279  CD2 LEU A 566      37.110  22.570   2.400  1.00  0.00           C
ATOM   4280 1HD2 LEU A 566      37.650  21.670   2.110  1.00  0.00           H
ATOM   4281 2HD2 LEU A 566      36.390  22.940   1.670  1.00  0.00           H
ATOM   4282 3HD2 LEU A 566      37.840  23.380   2.490  1.00  0.00           H
ATOM   4283  C   LEU A 566      38.790  20.240   5.780  1.00  0.00           C
ATOM   4284  O   LEU A 566      39.920  20.290   5.380  1.00  0.00           O
ATOM   4285  N   LEU A 567      38.470  19.740   6.990  1.00  0.00           N
ATOM   4286  H   LEU A 567      37.530  19.780   7.350  1.00  0.00           H
ATOM   4287  CA  LEU A 567      39.500  19.190   7.960  1.00  0.00           C
ATOM   4288  HA  LEU A 567      40.180  20.010   8.220  1.00  0.00           H
ATOM   4289  CB  LEU A 567      38.720  18.570   9.170  1.00  0.00           C
ATOM   4290  HB1 LEU A 567      38.200  17.680   8.820  1.00  0.00           H
ATOM   4291  HB2 LEU A 567      37.970  19.320   9.430  1.00  0.00           H
ATOM   4292  CG  LEU A 567      39.520  18.310  10.430  1.00  0.00           C
ATOM   4293  HG  LEU A 567      40.450  17.770  10.230  1.00  0.00           H
ATOM   4294  CD1 LEU A 567      39.880  19.550  11.180  1.00  0.00           C
ATOM   4295 1HD1 LEU A 567      39.040  20.220  11.340  1.00  0.00           H
ATOM   4296 2HD1 LEU A 567      40.460  19.250  12.060  1.00  0.00           H
ATOM   4297 3HD1 LEU A 567      40.610  20.190  10.700  1.00  0.00           H
ATOM   4298  CD2 LEU A 567      38.630  17.520  11.440  1.00  0.00           C
ATOM   4299 1HD2 LEU A 567      37.770  18.070  11.810  1.00  0.00           H
ATOM   4300 2HD2 LEU A 567      38.310  16.570  11.010  1.00  0.00           H
ATOM   4301 3HD2 LEU A 567      39.230  17.210  12.300  1.00  0.00           H
ATOM   4302  C   LEU A 567      40.330  18.040   7.300  1.00  0.00           C
ATOM   4303  O   LEU A 567      41.480  17.740   7.700  1.00  0.00           O
ATOM   4304  N   LYS A 568      39.760  17.300   6.370  1.00  0.00           N
ATOM   4305  H   LYS A 568      38.830  17.570   6.080  1.00  0.00           H
ATOM   4306  CA  LYS A 568      40.350  16.170   5.630  1.00  0.00           C
ATOM   4307  HA  LYS A 568      41.130  15.780   6.280  1.00  0.00           H
ATOM   4308  CB  LYS A 568      39.320  15.040   5.380  1.00  0.00           C
ATOM   4309  HB1 LYS A 568      39.770  14.250   4.770  1.00  0.00           H
ATOM   4310  HB2 LYS A 568      38.480  15.440   4.830  1.00  0.00           H
ATOM   4311  CG  LYS A 568      38.900  14.340   6.640  1.00  0.00           C
ATOM   4312  HG1 LYS A 568      37.920  13.880   6.500  1.00  0.00           H
ATOM   4313  HG2 LYS A 568      38.750  15.160   7.350  1.00  0.00           H
ATOM   4314  CD  LYS A 568      39.980  13.410   7.130  1.00  0.00           C
ATOM   4315  HD1 LYS A 568      40.900  13.970   7.310  1.00  0.00           H
ATOM   4316  HD2 LYS A 568      40.400  12.720   6.400  1.00  0.00           H
ATOM   4317  CE  LYS A 568      39.670  12.790   8.490  1.00  0.00           C
ATOM   4318  HE1 LYS A 568      39.090  13.400   9.180  1.00  0.00           H
ATOM   4319  HE2 LYS A 568      40.590  12.410   8.940  1.00  0.00           H
ATOM   4320  NZ  LYS A 568      38.870  11.530   8.300  1.00  0.00           N
ATOM   4321  HZ1 LYS A 568      38.710  11.110   9.210  1.00  0.00           H
ATOM   4322  HZ2 LYS A 568      37.960  11.830   7.980  1.00  0.00           H
ATOM   4323  HZ3 LYS A 568      39.390  10.930   7.670  1.00  0.00           H
ATOM   4324  C   LYS A 568      41.090  16.540   4.330  1.00  0.00           C
ATOM   4325  O   LYS A 568      41.700  15.690   3.710  1.00  0.00           O
ATOM   4326  N   HIS A 569      41.080  17.770   3.880  1.00  0.00           N
ATOM   4327  H   HIS A 569      40.410  18.420   4.280  1.00  0.00           H
ATOM   4328  CA  HIS A 569      41.680  18.280   2.600  1.00  0.00           C
ATOM   4329  HA  HIS A 569      41.420  17.640   1.760  1.00  0.00           H
ATOM   4330  CB  HIS A 569      41.200  19.650   2.280  1.00  0.00           C
ATOM   4331  HB1 HIS A 569      41.710  20.270   3.010  1.00  0.00           H
ATOM   4332  HB2 HIS A 569      40.120  19.620   2.440  1.00  0.00           H
ATOM   4333  CG  HIS A 569      41.510  20.130   0.830  1.00  0.00           C
ATOM   4334  ND1 HIS A 569      42.750  20.450   0.300  1.00  0.00           N
ATOM   4335  CE1 HIS A 569      42.530  20.650  -0.970  1.00  0.00           C
ATOM   4336  HE1 HIS A 569      43.250  20.860  -1.750  1.00  0.00           H
ATOM   4337  NE2 HIS A 569      41.220  20.500  -1.280  1.00  0.00           N
ATOM   4338  HE2 HIS A 569      40.850  20.620  -2.210  1.00  0.00           H
ATOM   4339  CD2 HIS A 569      40.580  20.130  -0.150  1.00  0.00           C
ATOM   4340  HD2 HIS A 569      39.540  19.850  -0.070  1.00  0.00           H
ATOM   4341  C   HIS A 569      43.220  18.200   2.640  1.00  0.00           C
ATOM   4342  O   HIS A 569      43.870  18.400   3.670  1.00  0.00           O
ATOM   4343  N   PRO A 570      43.900  17.720   1.570  1.00  0.00           N
ATOM   4344  CD  PRO A 570      43.340  17.060   0.380  1.00  0.00           C
ATOM   4345  HD1 PRO A 570      43.010  17.770  -0.380  1.00  0.00           H
ATOM   4346  HD2 PRO A 570      42.550  16.380   0.680  1.00  0.00           H
ATOM   4347  CG  PRO A 570      44.510  16.170  -0.120  1.00  0.00           C
ATOM   4348  HG1 PRO A 570      44.430  15.960  -1.190  1.00  0.00           H
ATOM   4349  HG2 PRO A 570      44.570  15.270   0.490  1.00  0.00           H
ATOM   4350  CB  PRO A 570      45.740  16.900   0.180  1.00  0.00           C
ATOM   4351  HB1 PRO A 570      45.720  17.640  -0.620  1.00  0.00           H
ATOM   4352  HB2 PRO A 570      46.630  16.270   0.140  1.00  0.00           H
ATOM   4353  CA  PRO A 570      45.380  17.580   1.490  1.00  0.00           C
ATOM   4354  HA  PRO A 570      45.660  16.880   2.280  1.00  0.00           H
ATOM   4355  C   PRO A 570      46.210  18.880   1.590  1.00  0.00           C
ATOM   4356  O   PRO A 570      47.400  18.780   1.880  1.00  0.00           O
ATOM   4357  N   PHE A 571      45.650  20.040   1.320  1.00  0.00           N
ATOM   4358  H   PHE A 571      44.760  20.060   0.860  1.00  0.00           H
ATOM   4359  CA  PHE A 571      46.250  21.330   1.680  1.00  0.00           C
ATOM   4360  HA  PHE A 571      47.130  21.530   1.060  1.00  0.00           H
ATOM   4361  CB  PHE A 571      45.320  22.540   1.480  1.00  0.00           C
ATOM   4362  HB1 PHE A 571      44.490  22.420   2.170  1.00  0.00           H
ATOM   4363  HB2 PHE A 571      44.790  22.340   0.540  1.00  0.00           H
ATOM   4364  CG  PHE A 571      45.940  23.950   1.520  1.00  0.00           C
ATOM   4365  CD1 PHE A 571      47.230  24.240   1.040  1.00  0.00           C
ATOM   4366  HD1 PHE A 571      47.740  23.570   0.360  1.00  0.00           H
ATOM   4367  CE1 PHE A 571      47.850  25.490   1.420  1.00  0.00           C
ATOM   4368  HE1 PHE A 571      48.840  25.810   1.150  1.00  0.00           H
ATOM   4369  CZ  PHE A 571      47.180  26.390   2.270  1.00  0.00           C
ATOM   4370  HZ  PHE A 571      47.700  27.290   2.560  1.00  0.00           H
ATOM   4371  CE2 PHE A 571      45.880  26.020   2.780  1.00  0.00           C
ATOM   4372  HE2 PHE A 571      45.350  26.640   3.480  1.00  0.00           H
ATOM   4373  CD2 PHE A 571      45.280  24.900   2.350  1.00  0.00           C
ATOM   4374  HD2 PHE A 571      44.320  24.600   2.740  1.00  0.00           H
ATOM   4375  C   PHE A 571      46.810  21.350   3.100  1.00  0.00           C
ATOM   4376  O   PHE A 571      47.910  21.800   3.400  1.00  0.00           O
ATOM   4377  N   LEU A 572      46.060  20.800   4.080  1.00  0.00           N
ATOM   4378  H   LEU A 572      45.150  20.420   3.860  1.00  0.00           H
ATOM   4379  CA  LEU A 572      46.430  21.020   5.500  1.00  0.00           C
ATOM   4380  HA  LEU A 572      46.840  22.020   5.610  1.00  0.00           H
ATOM   4381  CB  LEU A 572      45.140  20.830   6.240  1.00  0.00           C
ATOM   4382  HB1 LEU A 572      45.320  21.120   7.280  1.00  0.00           H
ATOM   4383  HB2 LEU A 572      44.820  19.780   6.210  1.00  0.00           H
ATOM   4384  CG  LEU A 572      43.900  21.590   5.800  1.00  0.00           C
ATOM   4385  HG  LEU A 572      43.600  21.460   4.760  1.00  0.00           H
ATOM   4386  CD1 LEU A 572      42.710  21.240   6.640  1.00  0.00           C
ATOM   4387 1HD1 LEU A 572      42.960  21.400   7.690  1.00  0.00           H
ATOM   4388 2HD1 LEU A 572      41.830  21.740   6.250  1.00  0.00           H
ATOM   4389 3HD1 LEU A 572      42.560  20.160   6.560  1.00  0.00           H
ATOM   4390  CD2 LEU A 572      43.990  23.160   5.980  1.00  0.00           C
ATOM   4391 1HD2 LEU A 572      44.250  23.460   6.990  1.00  0.00           H
ATOM   4392 2HD2 LEU A 572      44.740  23.500   5.260  1.00  0.00           H
ATOM   4393 3HD2 LEU A 572      43.040  23.600   5.670  1.00  0.00           H
ATOM   4394  C   LEU A 572      47.390  20.040   6.110  1.00  0.00           C
ATOM   4395  O   LEU A 572      47.920  20.190   7.200  1.00  0.00           O
ATOM   4396  N   ALA A 573      47.950  19.170   5.270  1.00  0.00           N
ATOM   4397  H   ALA A 573      47.530  19.240   4.350  1.00  0.00           H
ATOM   4398  CA  ALA A 573      49.210  18.390   5.470  1.00  0.00           C
ATOM   4399  HA  ALA A 573      49.080  17.890   6.430  1.00  0.00           H
ATOM   4400  CB  ALA A 573      49.410  17.420   4.310  1.00  0.00           C
ATOM   4401  HB1 ALA A 573      49.450  18.000   3.380  1.00  0.00           H
ATOM   4402  HB2 ALA A 573      50.430  17.050   4.370  1.00  0.00           H
ATOM   4403  HB3 ALA A 573      48.610  16.690   4.440  1.00  0.00           H
ATOM   4404  C   ALA A 573      50.540  19.240   5.620  1.00  0.00           C
ATOM   4405  O   ALA A 573      51.450  18.780   6.270  1.00  0.00           O
ATOM   4406  N   LYS A 574      50.490  20.470   5.200  1.00  0.00           N
ATOM   4407  H   LYS A 574      49.650  20.650   4.680  1.00  0.00           H
ATOM   4408  CA  LYS A 574      51.450  21.630   5.390  1.00  0.00           C
ATOM   4409  HA  LYS A 574      52.450  21.200   5.270  1.00  0.00           H
ATOM   4410  CB  LYS A 574      51.180  22.710   4.280  1.00  0.00           C
ATOM   4411  HB1 LYS A 574      51.870  23.520   4.480  1.00  0.00           H
ATOM   4412  HB2 LYS A 574      50.140  23.040   4.250  1.00  0.00           H
ATOM   4413  CG  LYS A 574      51.500  22.300   2.830  1.00  0.00           C
ATOM   4414  HG1 LYS A 574      50.930  21.400   2.620  1.00  0.00           H
ATOM   4415  HG2 LYS A 574      52.560  22.080   2.770  1.00  0.00           H
ATOM   4416  CD  LYS A 574      51.190  23.460   1.910  1.00  0.00           C
ATOM   4417  HD1 LYS A 574      51.840  24.300   2.130  1.00  0.00           H
ATOM   4418  HD2 LYS A 574      50.170  23.790   2.110  1.00  0.00           H
ATOM   4419  CE  LYS A 574      51.390  23.090   0.420  1.00  0.00           C
ATOM   4420  HE1 LYS A 574      50.520  22.850  -0.190  1.00  0.00           H
ATOM   4421  HE2 LYS A 574      51.960  22.160   0.350  1.00  0.00           H
ATOM   4422  NZ  LYS A 574      52.090  24.190  -0.220  1.00  0.00           N
ATOM   4423  HZ1 LYS A 574      51.590  25.070  -0.270  1.00  0.00           H
ATOM   4424  HZ2 LYS A 574      53.010  24.460   0.120  1.00  0.00           H
ATOM   4425  HZ3 LYS A 574      52.360  23.880  -1.140  1.00  0.00           H
ATOM   4426  C   LYS A 574      51.360  22.350   6.720  1.00  0.00           C
ATOM   4427  O   LYS A 574      52.290  23.080   6.990  1.00  0.00           O
ATOM   4428  N   ALA A 575      50.330  22.150   7.550  1.00  0.00           N
ATOM   4429  H   ALA A 575      49.550  21.560   7.280  1.00  0.00           H
ATOM   4430  CA  ALA A 575      50.100  22.970   8.780  1.00  0.00           C
ATOM   4431  HA  ALA A 575      50.130  23.990   8.390  1.00  0.00           H
ATOM   4432  CB  ALA A 575      48.700  22.770   9.360  1.00  0.00           C
ATOM   4433  HB1 ALA A 575      47.860  22.930   8.690  1.00  0.00           H
ATOM   4434  HB2 ALA A 575      48.750  21.760   9.750  1.00  0.00           H
ATOM   4435  HB3 ALA A 575      48.580  23.470  10.190  1.00  0.00           H
ATOM   4436  C   ALA A 575      51.240  22.770   9.860  1.00  0.00           C
ATOM   4437  O   ALA A 575      51.410  21.660  10.460  1.00  0.00           O
ATOM   4438  N   GLY A 576      52.040  23.790  10.030  1.00  0.00           N
ATOM   4439  H   GLY A 576      51.910  24.560   9.390  1.00  0.00           H
ATOM   4440  CA  GLY A 576      53.130  23.770  10.950  1.00  0.00           C
ATOM   4441  HA1 GLY A 576      53.870  24.540  10.750  1.00  0.00           H
ATOM   4442  HA2 GLY A 576      53.670  22.820  10.910  1.00  0.00           H
ATOM   4443  C   GLY A 576      52.700  23.950  12.360  1.00  0.00           C
ATOM   4444  O   GLY A 576      51.600  24.400  12.610  1.00  0.00           O
ATOM   4445  N   PRO A 577      53.610  23.680  13.310  1.00  0.00           N
ATOM   4446  CD  PRO A 577      54.940  23.120  13.000  1.00  0.00           C
ATOM   4447  HD1 PRO A 577      55.480  23.860  12.400  1.00  0.00           H
ATOM   4448  HD2 PRO A 577      54.790  22.190  12.470  1.00  0.00           H
ATOM   4449  CG  PRO A 577      55.570  22.830  14.340  1.00  0.00           C
ATOM   4450  HG1 PRO A 577      56.540  23.330  14.380  1.00  0.00           H
ATOM   4451  HG2 PRO A 577      55.600  21.740  14.430  1.00  0.00           H
ATOM   4452  CB  PRO A 577      54.710  23.440  15.450  1.00  0.00           C
ATOM   4453  HB1 PRO A 577      55.170  24.330  15.880  1.00  0.00           H
ATOM   4454  HB2 PRO A 577      54.430  22.720  16.220  1.00  0.00           H
ATOM   4455  CA  PRO A 577      53.480  23.960  14.770  1.00  0.00           C
ATOM   4456  HA  PRO A 577      52.580  23.380  14.980  1.00  0.00           H
ATOM   4457  C   PRO A 577      53.140  25.440  15.150  1.00  0.00           C
ATOM   4458  O   PRO A 577      53.460  26.340  14.320  1.00  0.00           O
ATOM   4459  N   PRO A 578      52.660  25.740  16.350  1.00  0.00           N
ATOM   4460  CD  PRO A 578      51.970  24.830  17.180  1.00  0.00           C
ATOM   4461  HD1 PRO A 578      52.680  24.140  17.650  1.00  0.00           H
ATOM   4462  HD2 PRO A 578      51.190  24.250  16.690  1.00  0.00           H
ATOM   4463  CG  PRO A 578      51.290  25.660  18.240  1.00  0.00           C
ATOM   4464  HG1 PRO A 578      51.290  25.230  19.250  1.00  0.00           H
ATOM   4465  HG2 PRO A 578      50.250  25.840  17.980  1.00  0.00           H
ATOM   4466  CB  PRO A 578      52.180  26.920  18.370  1.00  0.00           C
ATOM   4467  HB1 PRO A 578      52.980  26.550  19.020  1.00  0.00           H
ATOM   4468  HB2 PRO A 578      51.620  27.800  18.670  1.00  0.00           H
ATOM   4469  CA  PRO A 578      52.670  27.050  16.980  1.00  0.00           C
ATOM   4470  HA  PRO A 578      52.010  27.810  16.560  1.00  0.00           H
ATOM   4471  C   PRO A 578      54.110  27.640  16.880  1.00  0.00           C
ATOM   4472  O   PRO A 578      54.280  28.850  16.760  1.00  0.00           O
ATOM   4473  N   ALA A 579      55.210  26.900  16.930  1.00  0.00           N
ATOM   4474  H   ALA A 579      55.060  25.960  17.280  1.00  0.00           H
ATOM   4475  CA  ALA A 579      56.660  27.330  16.930  1.00  0.00           C
ATOM   4476  HA  ALA A 579      56.750  28.140  17.660  1.00  0.00           H
ATOM   4477  CB  ALA A 579      57.560  26.180  17.350  1.00  0.00           C
ATOM   4478  HB1 ALA A 579      57.370  26.040  18.420  1.00  0.00           H
ATOM   4479  HB2 ALA A 579      57.440  25.250  16.800  1.00  0.00           H
ATOM   4480  HB3 ALA A 579      58.550  26.600  17.190  1.00  0.00           H
ATOM   4481  C   ALA A 579      57.040  27.950  15.580  1.00  0.00           C
ATOM   4482  O   ALA A 579      57.960  28.750  15.440  1.00  0.00           O
ATOM   4483  N   SER A 580      56.340  27.550  14.520  1.00  0.00           N
ATOM   4484  H   SER A 580      55.550  26.940  14.710  1.00  0.00           H
ATOM   4485  CA  SER A 580      56.450  28.070  13.140  1.00  0.00           C
ATOM   4486  HA  SER A 580      57.480  28.350  12.930  1.00  0.00           H
ATOM   4487  CB  SER A 580      56.170  26.970  12.140  1.00  0.00           C
ATOM   4488  HB1 SER A 580      55.400  27.220  11.410  1.00  0.00           H
ATOM   4489  HB2 SER A 580      55.760  26.080  12.600  1.00  0.00           H
ATOM   4490  OG  SER A 580      57.290  26.660  11.400  1.00  0.00           O
ATOM   4491  HG  SER A 580      56.920  26.030  10.780  1.00  0.00           H
ATOM   4492  C   SER A 580      55.540  29.300  12.870  1.00  0.00           C
ATOM   4493  O   SER A 580      55.720  30.010  11.890  1.00  0.00           O
ATOM   4494  N   ILE A 581      54.600  29.610  13.810  1.00  0.00           N
ATOM   4495  H   ILE A 581      54.560  29.100  14.680  1.00  0.00           H
ATOM   4496  CA  ILE A 581      53.710  30.780  13.740  1.00  0.00           C
ATOM   4497  HA  ILE A 581      53.450  31.010  12.710  1.00  0.00           H
ATOM   4498  CB  ILE A 581      52.430  30.380  14.450  1.00  0.00           C
ATOM   4499  HB  ILE A 581      52.590  30.080  15.480  1.00  0.00           H
ATOM   4500  CG2 ILE A 581      51.580  31.630  14.580  1.00  0.00           C
ATOM   4501 1HG2 ILE A 581      51.970  32.280  15.360  1.00  0.00           H
ATOM   4502 2HG2 ILE A 581      51.530  32.200  13.650  1.00  0.00           H
ATOM   4503 3HG2 ILE A 581      50.560  31.290  14.790  1.00  0.00           H
ATOM   4504  CG1 ILE A 581      51.560  29.260  13.890  1.00  0.00           C
ATOM   4505 1HG1 ILE A 581      50.820  28.970  14.640  1.00  0.00           H
ATOM   4506 2HG1 ILE A 581      52.130  28.330  13.830  1.00  0.00           H
ATOM   4507  CD  ILE A 581      50.830  29.530  12.550  1.00  0.00           C
ATOM   4508  HD1 ILE A 581      51.130  28.780  11.810  1.00  0.00           H
ATOM   4509  HD2 ILE A 581      49.760  29.350  12.640  1.00  0.00           H
ATOM   4510  HD3 ILE A 581      51.040  30.530  12.170  1.00  0.00           H
ATOM   4511  C   ILE A 581      54.370  32.010  14.330  1.00  0.00           C
ATOM   4512  O   ILE A 581      54.510  33.020  13.620  1.00  0.00           O
ATOM   4513  N   VAL A 582      54.930  31.840  15.570  1.00  0.00           N
ATOM   4514  H   VAL A 582      54.710  31.080  16.200  1.00  0.00           H
ATOM   4515  CA  VAL A 582      55.510  33.020  16.230  1.00  0.00           C
ATOM   4516  HA  VAL A 582      54.720  33.770  16.340  1.00  0.00           H
ATOM   4517  CB  VAL A 582      56.120  32.800  17.630  1.00  0.00           C
ATOM   4518  HB  VAL A 582      56.490  33.760  17.970  1.00  0.00           H
ATOM   4519  CG1 VAL A 582      54.990  32.380  18.530  1.00  0.00           C
ATOM   4520 1HG1 VAL A 582      54.650  31.360  18.350  1.00  0.00           H
ATOM   4521 2HG1 VAL A 582      55.200  32.320  19.600  1.00  0.00           H
ATOM   4522 3HG1 VAL A 582      54.130  33.040  18.430  1.00  0.00           H
ATOM   4523  CG2 VAL A 582      57.250  31.700  17.770  1.00  0.00           C
ATOM   4524 1HG2 VAL A 582      56.940  30.710  17.450  1.00  0.00           H
ATOM   4525 2HG2 VAL A 582      58.120  31.990  17.170  1.00  0.00           H
ATOM   4526 3HG2 VAL A 582      57.560  31.710  18.810  1.00  0.00           H
ATOM   4527  C   VAL A 582      56.580  33.770  15.470  1.00  0.00           C
ATOM   4528  O   VAL A 582      56.570  35.040  15.670  1.00  0.00           O
ATOM   4529  N   PRO A 583      57.390  33.290  14.510  1.00  0.00           N
ATOM   4530  CD  PRO A 583      57.690  31.920  14.190  1.00  0.00           C
ATOM   4531  HD1 PRO A 583      56.880  31.530  13.570  1.00  0.00           H
ATOM   4532  HD2 PRO A 583      57.850  31.250  15.040  1.00  0.00           H
ATOM   4533  CG  PRO A 583      58.980  31.930  13.480  1.00  0.00           C
ATOM   4534  HG1 PRO A 583      59.050  31.040  12.860  1.00  0.00           H
ATOM   4535  HG2 PRO A 583      59.850  32.010  14.140  1.00  0.00           H
ATOM   4536  CB  PRO A 583      58.830  33.210  12.710  1.00  0.00           C
ATOM   4537  HB1 PRO A 583      58.290  33.080  11.770  1.00  0.00           H
ATOM   4538  HB2 PRO A 583      59.820  33.550  12.390  1.00  0.00           H
ATOM   4539  CA  PRO A 583      58.270  34.170  13.740  1.00  0.00           C
ATOM   4540  HA  PRO A 583      59.140  34.560  14.270  1.00  0.00           H
ATOM   4541  C   PRO A 583      57.610  35.470  13.190  1.00  0.00           C
ATOM   4542  O   PRO A 583      58.190  36.510  13.130  1.00  0.00           O
ATOM   4543  N   LEU A 584      56.340  35.460  12.770  1.00  0.00           N
ATOM   4544  H   LEU A 584      55.890  34.560  12.790  1.00  0.00           H
ATOM   4545  CA  LEU A 584      55.550  36.520  12.180  1.00  0.00           C
ATOM   4546  HA  LEU A 584      55.950  36.680  11.180  1.00  0.00           H
ATOM   4547  CB  LEU A 584      54.110  36.130  12.160  1.00  0.00           C
ATOM   4548  HB1 LEU A 584      53.440  36.920  11.820  1.00  0.00           H
ATOM   4549  HB2 LEU A 584      53.740  35.810  13.130  1.00  0.00           H
ATOM   4550  CG  LEU A 584      53.910  35.010  11.080  1.00  0.00           C
ATOM   4551  HG  LEU A 584      54.590  34.180  11.210  1.00  0.00           H
ATOM   4552  CD1 LEU A 584      52.510  34.380  11.210  1.00  0.00           C
ATOM   4553 1HD1 LEU A 584      52.240  34.110  12.230  1.00  0.00           H
ATOM   4554 2HD1 LEU A 584      51.770  35.050  10.780  1.00  0.00           H
ATOM   4555 3HD1 LEU A 584      52.480  33.460  10.630  1.00  0.00           H
ATOM   4556  CD2 LEU A 584      54.030  35.580   9.630  1.00  0.00           C
ATOM   4557 1HD2 LEU A 584      55.090  35.530   9.370  1.00  0.00           H
ATOM   4558 2HD2 LEU A 584      53.490  34.920   8.960  1.00  0.00           H
ATOM   4559 3HD2 LEU A 584      53.600  36.590   9.590  1.00  0.00           H
ATOM   4560  C   LEU A 584      55.780  37.800  13.030  1.00  0.00           C
ATOM   4561  O   LEU A 584      56.170  38.840  12.520  1.00  0.00           O
ATOM   4562  N   MET A 585      55.370  37.760  14.290  1.00  0.00           N
ATOM   4563  H   MET A 585      55.040  36.840  14.540  1.00  0.00           H
ATOM   4564  CA  MET A 585      55.570  38.770  15.330  1.00  0.00           C
ATOM   4565  HA  MET A 585      55.090  39.710  15.060  1.00  0.00           H
ATOM   4566  CB  MET A 585      54.970  38.350  16.650  1.00  0.00           C
ATOM   4567  HB1 MET A 585      54.870  39.230  17.290  1.00  0.00           H
ATOM   4568  HB2 MET A 585      55.630  37.590  17.070  1.00  0.00           H
ATOM   4569  CG  MET A 585      53.500  37.810  16.620  1.00  0.00           C
ATOM   4570  HG1 MET A 585      52.850  38.460  16.030  1.00  0.00           H
ATOM   4571  HG2 MET A 585      53.150  37.930  17.650  1.00  0.00           H
ATOM   4572  SD  MET A 585      53.360  36.110  15.960  1.00  0.00           S
ATOM   4573  CE  MET A 585      51.740  35.780  16.620  1.00  0.00           C
ATOM   4574  HE1 MET A 585      51.540  34.710  16.640  1.00  0.00           H
ATOM   4575  HE2 MET A 585      51.690  36.160  17.640  1.00  0.00           H
ATOM   4576  HE3 MET A 585      50.970  36.040  15.900  1.00  0.00           H
ATOM   4577  C   MET A 585      57.050  39.100  15.540  1.00  0.00           C
ATOM   4578  O   MET A 585      57.460  40.310  15.460  1.00  0.00           O
ATOM   4579  N   ARG A 586      57.880  38.050  15.770  1.00  0.00           N
ATOM   4580  H   ARG A 586      57.470  37.140  15.600  1.00  0.00           H
ATOM   4581  CA  ARG A 586      59.180  38.080  16.420  1.00  0.00           C
ATOM   4582  HA  ARG A 586      59.110  38.910  17.130  1.00  0.00           H
ATOM   4583  CB  ARG A 586      59.460  36.720  17.160  1.00  0.00           C
ATOM   4584  HB1 ARG A 586      60.400  36.710  17.700  1.00  0.00           H
ATOM   4585  HB2 ARG A 586      59.290  35.990  16.370  1.00  0.00           H
ATOM   4586  CG  ARG A 586      58.390  36.290  18.180  1.00  0.00           C
ATOM   4587  HG1 ARG A 586      58.670  35.300  18.540  1.00  0.00           H
ATOM   4588  HG2 ARG A 586      57.440  36.370  17.650  1.00  0.00           H
ATOM   4589  CD  ARG A 586      58.460  37.280  19.350  1.00  0.00           C
ATOM   4590  HD1 ARG A 586      58.210  38.320  19.150  1.00  0.00           H
ATOM   4591  HD2 ARG A 586      59.500  37.380  19.680  1.00  0.00           H
ATOM   4592  NE  ARG A 586      57.470  36.800  20.390  1.00  0.00           N
ATOM   4593  HE  ARG A 586      57.610  35.880  20.770  1.00  0.00           H
ATOM   4594  CZ  ARG A 586      56.280  37.330  20.600  1.00  0.00           C
ATOM   4595  NH1 ARG A 586      55.990  38.490  20.120  1.00  0.00           N
ATOM   4596 1HH1 ARG A 586      56.710  39.110  19.800  1.00  0.00           H
ATOM   4597 2HH1 ARG A 586      55.070  38.880  20.270  1.00  0.00           H
ATOM   4598  NH2 ARG A 586      55.470  36.690  21.380  1.00  0.00           N
ATOM   4599 1HH2 ARG A 586      55.740  35.850  21.870  1.00  0.00           H
ATOM   4600 2HH2 ARG A 586      54.570  37.110  21.570  1.00  0.00           H
ATOM   4601  C   ARG A 586      60.340  38.310  15.500  1.00  0.00           C
ATOM   4602  O   ARG A 586      61.390  38.640  15.940  1.00  0.00           O
ATOM   4603  N   GLN A 587      60.120  38.090  14.180  1.00  0.00           N
ATOM   4604  H   GLN A 587      59.210  37.760  13.900  1.00  0.00           H
ATOM   4605  CA  GLN A 587      61.170  38.270  13.110  1.00  0.00           C
ATOM   4606  HA  GLN A 587      62.060  38.700  13.570  1.00  0.00           H
ATOM   4607  CB  GLN A 587      61.640  36.870  12.760  1.00  0.00           C
ATOM   4608  HB1 GLN A 587      62.440  36.980  12.030  1.00  0.00           H
ATOM   4609  HB2 GLN A 587      60.820  36.360  12.250  1.00  0.00           H
ATOM   4610  CG  GLN A 587      62.140  36.050  13.960  1.00  0.00           C
ATOM   4611  HG1 GLN A 587      61.390  35.940  14.740  1.00  0.00           H
ATOM   4612  HG2 GLN A 587      62.930  36.600  14.460  1.00  0.00           H
ATOM   4613  CD  GLN A 587      62.760  34.760  13.530  1.00  0.00           C
ATOM   4614  OE1 GLN A 587      63.740  34.700  12.800  1.00  0.00           O
ATOM   4615  NE2 GLN A 587      62.170  33.700  13.970  1.00  0.00           N
ATOM   4616 1HE2 GLN A 587      61.420  33.690  14.640  1.00  0.00           H
ATOM   4617 2HE2 GLN A 587      62.480  32.780  13.680  1.00  0.00           H
ATOM   4618  C   GLN A 587      60.720  39.140  11.910  1.00  0.00           C
ATOM   4619  O   GLN A 587      61.520  40.030  11.430  1.00  0.00           O
ATOM   4620  N   ASN A 588      59.500  39.040  11.490  1.00  0.00           N
ATOM   4621  H   ASN A 588      58.840  38.490  12.030  1.00  0.00           H
ATOM   4622  CA  ASN A 588      59.080  39.540  10.150  1.00  0.00           C
ATOM   4623  HA  ASN A 588      60.000  39.630   9.580  1.00  0.00           H
ATOM   4624  CB  ASN A 588      58.230  38.430   9.540  1.00  0.00           C
ATOM   4625  HB1 ASN A 588      57.690  38.850   8.690  1.00  0.00           H
ATOM   4626  HB2 ASN A 588      57.490  37.960  10.200  1.00  0.00           H
ATOM   4627  CG  ASN A 588      59.030  37.210   9.090  1.00  0.00           C
ATOM   4628  OD1 ASN A 588      59.010  36.150   9.660  1.00  0.00           O
ATOM   4629  ND2 ASN A 588      59.690  37.310   7.960  1.00  0.00           N
ATOM   4630 1HD2 ASN A 588      59.750  38.090   7.320  1.00  0.00           H
ATOM   4631 2HD2 ASN A 588      60.070  36.420   7.660  1.00  0.00           H
ATOM   4632  C   ASN A 588      58.450  40.940  10.250  1.00  0.00           C
ATOM   4633  O   ASN A 588      58.750  41.780   9.400  1.00  0.00           O
ATOM   4634  N   ARG A 589      57.610  41.170  11.240  1.00  0.00           N
ATOM   4635  H   ARG A 589      57.390  40.380  11.830  1.00  0.00           H
ATOM   4636  CA  ARG A 589      57.160  42.490  11.690  1.00  0.00           C
ATOM   4637  HA  ARG A 589      57.010  43.230  10.900  1.00  0.00           H
ATOM   4638  CB  ARG A 589      55.830  42.290  12.380  1.00  0.00           C
ATOM   4639  HB1 ARG A 589      55.900  41.630  13.250  1.00  0.00           H
ATOM   4640  HB2 ARG A 589      55.200  41.690  11.730  1.00  0.00           H
ATOM   4641  CG  ARG A 589      55.150  43.620  12.700  1.00  0.00           C
ATOM   4642  HG1 ARG A 589      55.120  44.390  11.930  1.00  0.00           H
ATOM   4643  HG2 ARG A 589      55.600  44.180  13.530  1.00  0.00           H
ATOM   4644  CD  ARG A 589      53.580  43.400  12.890  1.00  0.00           C
ATOM   4645  HD1 ARG A 589      53.130  42.830  12.080  1.00  0.00           H
ATOM   4646  HD2 ARG A 589      53.190  44.420  12.810  1.00  0.00           H
ATOM   4647  NE  ARG A 589      53.330  42.700  14.200  1.00  0.00           N
ATOM   4648  HE  ARG A 589      54.030  42.540  14.920  1.00  0.00           H
ATOM   4649  CZ  ARG A 589      52.260  42.050  14.530  1.00  0.00           C
ATOM   4650  NH1 ARG A 589      52.190  41.400  15.650  1.00  0.00           N
ATOM   4651 1HH1 ARG A 589      52.990  41.510  16.250  1.00  0.00           H
ATOM   4652 2HH1 ARG A 589      51.340  40.940  15.960  1.00  0.00           H
ATOM   4653  NH2 ARG A 589      51.220  41.980  13.840  1.00  0.00           N
ATOM   4654 1HH2 ARG A 589      51.000  42.770  13.250  1.00  0.00           H
ATOM   4655 2HH2 ARG A 589      50.470  41.420  14.240  1.00  0.00           H
ATOM   4656  C   ARG A 589      58.150  43.190  12.730  1.00  0.00           C
ATOM   4657  O   ARG A 589      58.430  44.400  12.660  1.00  0.00           O
ATOM   4658  N   THR A 590      58.760  42.350  13.580  1.00  0.00           N
ATOM   4659  H   THR A 590      58.660  41.350  13.430  1.00  0.00           H
ATOM   4660  CA  THR A 590      59.480  42.780  14.800  1.00  0.00           C
ATOM   4661  HA  THR A 590      59.670  41.850  15.340  1.00  0.00           H
ATOM   4662  CB  THR A 590      60.840  43.340  14.400  1.00  0.00           C
ATOM   4663  HB  THR A 590      60.810  44.420  14.540  1.00  0.00           H
ATOM   4664  CG2 THR A 590      62.000  42.840  15.240  1.00  0.00           C
ATOM   4665 1HG2 THR A 590      62.130  41.760  15.260  1.00  0.00           H
ATOM   4666 2HG2 THR A 590      62.950  43.270  14.920  1.00  0.00           H
ATOM   4667 3HG2 THR A 590      61.860  43.370  16.180  1.00  0.00           H
ATOM   4668  OG1 THR A 590      61.310  43.150  13.050  1.00  0.00           O
ATOM   4669  HG1 THR A 590      61.930  43.880  12.960  1.00  0.00           H
ATOM   4670  C   THR A 590      58.660  43.570  15.870  1.00  0.00           C
ATOM   4671  O   THR A 590      59.130  44.530  16.450  1.00  0.00           O
ATOM   4672  N   ARG A 591      57.380  43.230  16.050  1.00  0.00           N
ATOM   4673  H   ARG A 591      57.110  42.390  15.560  1.00  0.00           H
ATOM   4674  CA  ARG A 591      56.450  43.600  17.150  1.00  0.00           C
ATOM   4675  HA  ARG A 591      56.970  43.960  18.040  1.00  0.00           H
ATOM   4676  CB  ARG A 591      55.630  44.760  16.720  1.00  0.00           C
ATOM   4677  HB1 ARG A 591      55.060  44.490  15.830  1.00  0.00           H
ATOM   4678  HB2 ARG A 591      56.310  45.580  16.490  1.00  0.00           H
ATOM   4679  CG  ARG A 591      54.630  45.240  17.820  1.00  0.00           C
ATOM   4680  HG1 ARG A 591      55.230  45.550  18.680  1.00  0.00           H
ATOM   4681  HG2 ARG A 591      53.860  44.480  17.940  1.00  0.00           H
ATOM   4682  CD  ARG A 591      53.910  46.530  17.420  1.00  0.00           C
ATOM   4683  HD1 ARG A 591      53.190  46.690  18.230  1.00  0.00           H
ATOM   4684  HD2 ARG A 591      53.310  46.260  16.550  1.00  0.00           H
ATOM   4685  NE  ARG A 591      54.750  47.710  17.150  1.00  0.00           N
ATOM   4686  HE  ARG A 591      55.100  48.140  18.000  1.00  0.00           H
ATOM   4687  CZ  ARG A 591      54.910  48.500  16.120  1.00  0.00           C
ATOM   4688  NH1 ARG A 591      54.450  48.090  15.010  1.00  0.00           N
ATOM   4689 1HH1 ARG A 591      54.020  47.180  14.990  1.00  0.00           H
ATOM   4690 2HH1 ARG A 591      54.440  48.650  14.170  1.00  0.00           H
ATOM   4691  NH2 ARG A 591      55.610  49.580  16.110  1.00  0.00           N
ATOM   4692 1HH2 ARG A 591      56.010  49.920  16.980  1.00  0.00           H
ATOM   4693 2HH2 ARG A 591      55.820  49.970  15.200  1.00  0.00           H
ATOM   4694  C   ARG A 591      55.530  42.390  17.470  1.00  0.00           C
ATOM   4695  OC1 ARG A 591      54.710  41.980  16.580  1.00  0.00           O
ATOM   4696  OC2 ARG A 591      55.700  41.980  18.620  1.00  0.00           O
ATOM   4697  N   UNK B 592      41.190  45.090  16.630  1.00  0.00            
ATOM   4698  C   UNK B 592      41.430  43.460  19.070  1.00  0.00            
ATOM   4699  HC  UNK B 592      42.420  43.870  19.290  1.00  0.00            
ATOM   4700  C1  UNK B 592      41.620  42.790  17.680  1.00  0.00            
ATOM   4701  HC1 UNK B 592      40.630  42.400  17.410  1.00  0.00            
ATOM   4702  HC2 UNK B 592      42.290  41.920  17.740  1.00  0.00            
ATOM   4703  C2  UNK B 592      40.490  44.640  18.940  1.00  0.00            
ATOM   4704  H7  UNK B 592      40.430  45.100  19.930  1.00  0.00            
ATOM   4705  H10 UNK B 592      39.450  44.360  18.730  1.00  0.00            
ATOM   4706  C3  UNK B 592      42.070  43.890  16.660  1.00  0.00            
ATOM   4707  H8  UNK B 592      43.060  44.290  16.880  1.00  0.00            
ATOM   4708  H11 UNK B 592      42.160  43.350  15.710  1.00  0.00            
ATOM   4709  C4  UNK B 592      41.030  45.650  18.000  1.00  0.00            
ATOM   4710  H9  UNK B 592      40.420  46.550  17.850  1.00  0.00            
ATOM   4711  H12 UNK B 592      42.050  45.970  18.270  1.00  0.00            
ATOM   4712  H   UNK B 592      40.250  44.810  16.370  1.00  0.00            
ATOM   4713  N1  UNK B 592      40.980  42.390  20.020  1.00  0.00            
ATOM   4714  H13 UNK B 592      40.020  42.080  20.080  1.00  0.00            
ATOM   4715  C5  UNK B 592      41.800  41.830  20.950  1.00  0.00            
ATOM   4716  N2  UNK B 592      43.030  42.240  21.010  1.00  0.00            
ATOM   4717  C6  UNK B 592      43.750  41.580  21.900  1.00  0.00            
ATOM   4718  N3  UNK B 592      43.380  40.620  22.760  1.00  0.00            
ATOM   4719  C7  UNK B 592      42.140  40.300  22.690  1.00  0.00            
ATOM   4720  N4  UNK B 592      41.450  39.470  23.550  1.00  0.00            
ATOM   4721  C8  UNK B 592      41.250  40.880  21.860  1.00  0.00            
ATOM   4722  C9  UNK B 592      40.070  39.460  23.130  1.00  0.00            
ATOM   4723  H1  UNK B 592      39.250  38.970  23.620  1.00  0.00            
ATOM   4724  H14 UNK B 592      41.910  38.970  24.290  1.00  0.00            
ATOM   4725  C10 UNK B 592      39.930  40.370  22.080  1.00  0.00            
ATOM   4726  H2  UNK B 592      39.060  40.420  21.440  1.00  0.00            
ATOM   4727  N5  UNK B 592      45.080  41.810  21.920  1.00  0.00            
ATOM   4728  H15 UNK B 592      45.490  40.930  22.200  1.00  0.00            
ATOM   4729  C11 UNK B 592      45.910  42.840  21.550  1.00  0.00            
ATOM   4730  C12 UNK B 592      45.440  44.170  21.360  1.00  0.00            
ATOM   4731  H3  UNK B 592      44.380  44.400  21.470  1.00  0.00            
ATOM   4732  C13 UNK B 592      46.350  45.220  21.230  1.00  0.00            
ATOM   4733  C14 UNK B 592      47.710  44.930  21.270  1.00  0.00            
ATOM   4734  H4  UNK B 592      48.470  45.700  21.290  1.00  0.00            
ATOM   4735  CL  UNK B 592      45.850  46.740  20.570  1.00  0.00            
ATOM   4736  C15 UNK B 592      48.170  43.680  21.440  1.00  0.00            
ATOM   4737  H5  UNK B 592      49.240  43.560  21.300  1.00  0.00            
ATOM   4738  C16 UNK B 592      47.290  42.630  21.510  1.00  0.00            
ATOM   4739  H6  UNK B 592      47.630  41.600  21.620  1.00  0.00            
TER
ENDMDL
