# Supplementary material for: The Inhibitory Mechanism of 7H-Pyrrolo[2,3-d]pyrimidine Derivatives as Inhibitors of P21-Activated Kinase 4 through Molecular Dynamics Simulation
Source: Molecules. 2023 Jan 3;28(1):413. doi: 10.3390/molecules28010413 (PMC9823812; doi:10.3390/molecules28010413)
Supplement: Supplementary file 1 [file molecules-28-00413-s001.zip › 5n.pdb]

REMARK    GENERATED BY TRJCONV
TITLE     SERINE/THREONINE-PROTEIN KINASE PAK 4 in water t= 187770.00000 step= 93885000
REMARK    THIS IS A SIMULATION BOX
CRYST1   82.755   82.755   82.755  90.00  90.00  90.00 P 1           1
MODEL        1
ATOM      1  N   SER A 299      69.020  48.450  16.820  1.00  0.00           N
ATOM      2  H1  SER A 299      69.290  49.170  16.170  1.00  0.00           H
ATOM      3  H2  SER A 299      69.130  47.520  16.460  1.00  0.00           H
ATOM      4  H3  SER A 299      68.050  48.530  17.080  1.00  0.00           H
ATOM      5  CA  SER A 299      69.820  48.420  18.050  1.00  0.00           C
ATOM      6  HA  SER A 299      69.500  47.560  18.640  1.00  0.00           H
ATOM      7  CB  SER A 299      71.350  48.240  17.730  1.00  0.00           C
ATOM      8  HB1 SER A 299      71.870  48.020  18.660  1.00  0.00           H
ATOM      9  HB2 SER A 299      71.810  49.130  17.300  1.00  0.00           H
ATOM     10  OG  SER A 299      71.470  47.270  16.720  1.00  0.00           O
ATOM     11  HG  SER A 299      72.400  47.120  16.590  1.00  0.00           H
ATOM     12  C   SER A 299      69.590  49.650  18.950  1.00  0.00           C
ATOM     13  O   SER A 299      69.190  50.710  18.430  1.00  0.00           O
ATOM     14  N   SER A 300      69.810  49.510  20.250  1.00  0.00           N
ATOM     15  H   SER A 300      69.910  48.570  20.610  1.00  0.00           H
ATOM     16  CA  SER A 300      69.720  50.640  21.240  1.00  0.00           C
ATOM     17  HA  SER A 300      69.900  51.540  20.650  1.00  0.00           H
ATOM     18  CB  SER A 300      68.330  50.790  21.830  1.00  0.00           C
ATOM     19  HB1 SER A 300      67.620  50.650  21.020  1.00  0.00           H
ATOM     20  HB2 SER A 300      68.240  51.720  22.400  1.00  0.00           H
ATOM     21  OG  SER A 300      68.080  49.860  22.870  1.00  0.00           O
ATOM     22  HG  SER A 300      67.300  49.410  22.530  1.00  0.00           H
ATOM     23  C   SER A 300      70.760  50.390  22.380  1.00  0.00           C
ATOM     24  O   SER A 300      71.430  49.340  22.560  1.00  0.00           O
ATOM     25  N   HIS A 301      70.950  51.400  23.190  1.00  0.00           N
ATOM     26  H   HIS A 301      70.470  52.280  23.100  1.00  0.00           H
ATOM     27  CA  HIS A 301      71.620  51.330  24.480  1.00  0.00           C
ATOM     28  HA  HIS A 301      72.190  50.400  24.440  1.00  0.00           H
ATOM     29  CB  HIS A 301      72.650  52.440  24.670  1.00  0.00           C
ATOM     30  HB1 HIS A 301      73.280  52.420  23.780  1.00  0.00           H
ATOM     31  HB2 HIS A 301      73.220  52.340  25.600  1.00  0.00           H
ATOM     32  CG  HIS A 301      72.060  53.850  24.750  1.00  0.00           C
ATOM     33  ND1 HIS A 301      71.680  54.600  23.620  1.00  0.00           N
ATOM     34  CE1 HIS A 301      71.320  55.810  24.100  1.00  0.00           C
ATOM     35  HE1 HIS A 301      71.030  56.570  23.390  1.00  0.00           H
ATOM     36  NE2 HIS A 301      71.540  55.850  25.440  1.00  0.00           N
ATOM     37  HE2 HIS A 301      71.560  56.640  26.060  1.00  0.00           H
ATOM     38  CD2 HIS A 301      72.070  54.660  25.850  1.00  0.00           C
ATOM     39  HD2 HIS A 301      72.150  54.310  26.860  1.00  0.00           H
ATOM     40  C   HIS A 301      70.690  51.200  25.700  1.00  0.00           C
ATOM     41  O   HIS A 301      71.240  51.220  26.820  1.00  0.00           O
ATOM     42  N   GLU A 302      69.380  51.090  25.540  1.00  0.00           N
ATOM     43  H   GLU A 302      68.930  51.000  24.640  1.00  0.00           H
ATOM     44  CA  GLU A 302      68.410  51.310  26.610  1.00  0.00           C
ATOM     45  HA  GLU A 302      68.650  52.200  27.190  1.00  0.00           H
ATOM     46  CB  GLU A 302      67.020  51.540  26.000  1.00  0.00           C
ATOM     47  HB1 GLU A 302      66.370  51.720  26.860  1.00  0.00           H
ATOM     48  HB2 GLU A 302      66.780  50.710  25.340  1.00  0.00           H
ATOM     49  CG  GLU A 302      66.800  52.850  25.130  1.00  0.00           C
ATOM     50  HG1 GLU A 302      65.820  52.850  24.650  1.00  0.00           H
ATOM     51  HG2 GLU A 302      67.460  52.810  24.260  1.00  0.00           H
ATOM     52  CD  GLU A 302      67.060  54.120  25.900  1.00  0.00           C
ATOM     53  OE1 GLU A 302      67.290  54.190  27.160  1.00  0.00           O
ATOM     54  OE2 GLU A 302      66.950  55.230  25.310  1.00  0.00           O
ATOM     55  C   GLU A 302      68.390  50.080  27.640  1.00  0.00           C
ATOM     56  O   GLU A 302      67.950  50.300  28.810  1.00  0.00           O
ATOM     57  N   GLN A 303      68.810  48.900  27.220  1.00  0.00           N
ATOM     58  H   GLN A 303      69.190  48.780  26.290  1.00  0.00           H
ATOM     59  CA  GLN A 303      68.970  47.710  28.030  1.00  0.00           C
ATOM     60  HA  GLN A 303      68.350  47.840  28.920  1.00  0.00           H
ATOM     61  CB  GLN A 303      68.450  46.420  27.350  1.00  0.00           C
ATOM     62  HB1 GLN A 303      68.920  45.610  27.920  1.00  0.00           H
ATOM     63  HB2 GLN A 303      68.790  46.370  26.320  1.00  0.00           H
ATOM     64  CG  GLN A 303      66.930  46.420  27.340  1.00  0.00           C
ATOM     65  HG1 GLN A 303      66.600  46.710  28.340  1.00  0.00           H
ATOM     66  HG2 GLN A 303      66.620  45.410  27.090  1.00  0.00           H
ATOM     67  CD  GLN A 303      66.310  47.370  26.360  1.00  0.00           C
ATOM     68  OE1 GLN A 303      65.700  48.380  26.750  1.00  0.00           O
ATOM     69  NE2 GLN A 303      66.300  47.030  25.090  1.00  0.00           N
ATOM     70 1HE2 GLN A 303      66.830  46.210  24.830  1.00  0.00           H
ATOM     71 2HE2 GLN A 303      65.830  47.580  24.390  1.00  0.00           H
ATOM     72  C   GLN A 303      70.410  47.660  28.580  1.00  0.00           C
ATOM     73  O   GLN A 303      70.740  47.220  29.680  1.00  0.00           O
ATOM     74  N   PHE A 304      71.380  48.160  27.820  1.00  0.00           N
ATOM     75  H   PHE A 304      71.110  48.360  26.860  1.00  0.00           H
ATOM     76  CA  PHE A 304      72.750  48.350  28.270  1.00  0.00           C
ATOM     77  HA  PHE A 304      73.050  47.380  28.690  1.00  0.00           H
ATOM     78  CB  PHE A 304      73.660  48.760  27.090  1.00  0.00           C
ATOM     79  HB1 PHE A 304      73.390  49.690  26.590  1.00  0.00           H
ATOM     80  HB2 PHE A 304      73.460  47.980  26.370  1.00  0.00           H
ATOM     81  CG  PHE A 304      75.180  48.900  27.450  1.00  0.00           C
ATOM     82  CD1 PHE A 304      75.880  49.910  26.810  1.00  0.00           C
ATOM     83  HD1 PHE A 304      75.450  50.500  26.020  1.00  0.00           H
ATOM     84  CE1 PHE A 304      77.240  50.100  27.060  1.00  0.00           C
ATOM     85  HE1 PHE A 304      77.740  50.920  26.560  1.00  0.00           H
ATOM     86  CZ  PHE A 304      77.840  49.280  28.010  1.00  0.00           C
ATOM     87  HZ  PHE A 304      78.860  49.550  28.250  1.00  0.00           H
ATOM     88  CE2 PHE A 304      77.140  48.150  28.550  1.00  0.00           C
ATOM     89  HE2 PHE A 304      77.530  47.550  29.350  1.00  0.00           H
ATOM     90  CD2 PHE A 304      75.820  47.920  28.190  1.00  0.00           C
ATOM     91  HD2 PHE A 304      75.270  47.070  28.560  1.00  0.00           H
ATOM     92  C   PHE A 304      72.840  49.400  29.470  1.00  0.00           C
ATOM     93  O   PHE A 304      73.530  49.050  30.460  1.00  0.00           O
ATOM     94  N   ARG A 305      72.080  50.490  29.430  1.00  0.00           N
ATOM     95  H   ARG A 305      71.710  50.700  28.510  1.00  0.00           H
ATOM     96  CA  ARG A 305      71.880  51.490  30.470  1.00  0.00           C
ATOM     97  HA  ARG A 305      72.770  52.120  30.590  1.00  0.00           H
ATOM     98  CB  ARG A 305      70.720  52.410  30.080  1.00  0.00           C
ATOM     99  HB1 ARG A 305      69.860  51.770  29.900  1.00  0.00           H
ATOM    100  HB2 ARG A 305      70.980  52.800  29.090  1.00  0.00           H
ATOM    101  CG  ARG A 305      70.380  53.600  30.950  1.00  0.00           C
ATOM    102  HG1 ARG A 305      71.230  54.280  30.860  1.00  0.00           H
ATOM    103  HG2 ARG A 305      70.400  53.330  32.010  1.00  0.00           H
ATOM    104  CD  ARG A 305      69.010  54.200  30.690  1.00  0.00           C
ATOM    105  HD1 ARG A 305      68.650  54.960  31.370  1.00  0.00           H
ATOM    106  HD2 ARG A 305      68.230  53.440  30.700  1.00  0.00           H
ATOM    107  NE  ARG A 305      68.920  54.820  29.390  1.00  0.00           N
ATOM    108  HE  ARG A 305      68.200  54.410  28.800  1.00  0.00           H
ATOM    109  CZ  ARG A 305      69.590  55.840  28.760  1.00  0.00           C
ATOM    110  NH1 ARG A 305      69.290  56.180  27.550  1.00  0.00           N
ATOM    111 1HH1 ARG A 305      68.520  55.860  26.980  1.00  0.00           H
ATOM    112 2HH1 ARG A 305      69.840  56.910  27.120  1.00  0.00           H
ATOM    113  NH2 ARG A 305      70.560  56.490  29.380  1.00  0.00           N
ATOM    114 1HH2 ARG A 305      70.710  56.380  30.370  1.00  0.00           H
ATOM    115 2HH2 ARG A 305      70.970  57.230  28.820  1.00  0.00           H
ATOM    116  C   ARG A 305      71.540  50.820  31.770  1.00  0.00           C
ATOM    117  O   ARG A 305      72.100  51.210  32.810  1.00  0.00           O
ATOM    118  N   ALA A 306      70.560  49.950  31.760  1.00  0.00           N
ATOM    119  H   ALA A 306      70.150  49.780  30.850  1.00  0.00           H
ATOM    120  CA  ALA A 306      70.000  49.170  32.940  1.00  0.00           C
ATOM    121  HA  ALA A 306      70.080  49.920  33.720  1.00  0.00           H
ATOM    122  CB  ALA A 306      68.470  48.760  32.750  1.00  0.00           C
ATOM    123  HB1 ALA A 306      67.930  49.710  32.750  1.00  0.00           H
ATOM    124  HB2 ALA A 306      68.200  48.150  31.890  1.00  0.00           H
ATOM    125  HB3 ALA A 306      68.200  48.110  33.580  1.00  0.00           H
ATOM    126  C   ALA A 306      70.910  48.040  33.330  1.00  0.00           C
ATOM    127  O   ALA A 306      70.790  47.590  34.450  1.00  0.00           O
ATOM    128  N   ALA A 307      71.840  47.600  32.500  1.00  0.00           N
ATOM    129  H   ALA A 307      71.700  47.770  31.510  1.00  0.00           H
ATOM    130  CA  ALA A 307      73.010  46.760  32.910  1.00  0.00           C
ATOM    131  HA  ALA A 307      72.630  46.100  33.700  1.00  0.00           H
ATOM    132  CB  ALA A 307      73.710  46.110  31.690  1.00  0.00           C
ATOM    133  HB1 ALA A 307      74.410  45.320  31.970  1.00  0.00           H
ATOM    134  HB2 ALA A 307      72.980  45.620  31.040  1.00  0.00           H
ATOM    135  HB3 ALA A 307      74.280  46.840  31.120  1.00  0.00           H
ATOM    136  C   ALA A 307      74.020  47.620  33.640  1.00  0.00           C
ATOM    137  O   ALA A 307      74.380  47.210  34.740  1.00  0.00           O
ATOM    138  N   LEU A 308      74.460  48.770  33.170  1.00  0.00           N
ATOM    139  H   LEU A 308      74.080  49.070  32.280  1.00  0.00           H
ATOM    140  CA  LEU A 308      75.460  49.630  33.760  1.00  0.00           C
ATOM    141  HA  LEU A 308      76.370  49.080  33.970  1.00  0.00           H
ATOM    142  CB  LEU A 308      75.760  50.790  32.790  1.00  0.00           C
ATOM    143  HB1 LEU A 308      76.330  51.530  33.340  1.00  0.00           H
ATOM    144  HB2 LEU A 308      74.830  51.300  32.550  1.00  0.00           H
ATOM    145  CG  LEU A 308      76.490  50.410  31.490  1.00  0.00           C
ATOM    146  HG  LEU A 308      75.990  49.510  31.130  1.00  0.00           H
ATOM    147  CD1 LEU A 308      76.550  51.560  30.470  1.00  0.00           C
ATOM    148 1HD1 LEU A 308      77.100  52.400  30.880  1.00  0.00           H
ATOM    149 2HD1 LEU A 308      76.970  51.180  29.540  1.00  0.00           H
ATOM    150 3HD1 LEU A 308      75.550  51.930  30.230  1.00  0.00           H
ATOM    151  CD2 LEU A 308      77.930  50.090  31.830  1.00  0.00           C
ATOM    152 1HD2 LEU A 308      77.940  49.080  32.240  1.00  0.00           H
ATOM    153 2HD2 LEU A 308      78.540  49.900  30.940  1.00  0.00           H
ATOM    154 3HD2 LEU A 308      78.440  50.860  32.400  1.00  0.00           H
ATOM    155  C   LEU A 308      74.890  50.220  35.110  1.00  0.00           C
ATOM    156  O   LEU A 308      75.670  50.410  36.020  1.00  0.00           O
ATOM    157  N   GLN A 309      73.540  50.360  35.250  1.00  0.00           N
ATOM    158  H   GLN A 309      72.990  50.200  34.420  1.00  0.00           H
ATOM    159  CA  GLN A 309      72.930  50.750  36.530  1.00  0.00           C
ATOM    160  HA  GLN A 309      73.230  51.790  36.660  1.00  0.00           H
ATOM    161  CB  GLN A 309      71.460  50.710  36.270  1.00  0.00           C
ATOM    162  HB1 GLN A 309      71.170  49.670  36.150  1.00  0.00           H
ATOM    163  HB2 GLN A 309      71.280  51.340  35.390  1.00  0.00           H
ATOM    164  CG  GLN A 309      70.650  51.200  37.480  1.00  0.00           C
ATOM    165  HG1 GLN A 309      70.970  52.230  37.600  1.00  0.00           H
ATOM    166  HG2 GLN A 309      70.870  50.700  38.420  1.00  0.00           H
ATOM    167  CD  GLN A 309      69.180  51.140  37.170  1.00  0.00           C
ATOM    168  OE1 GLN A 309      68.720  50.410  36.380  1.00  0.00           O
ATOM    169  NE2 GLN A 309      68.370  51.780  37.920  1.00  0.00           N
ATOM    170 1HE2 GLN A 309      68.780  52.270  38.700  1.00  0.00           H
ATOM    171 2HE2 GLN A 309      67.380  51.630  37.770  1.00  0.00           H
ATOM    172  C   GLN A 309      73.420  49.830  37.730  1.00  0.00           C
ATOM    173  O   GLN A 309      73.410  50.270  38.880  1.00  0.00           O
ATOM    174  N   LEU A 310      73.820  48.600  37.450  1.00  0.00           N
ATOM    175  H   LEU A 310      73.710  48.320  36.490  1.00  0.00           H
ATOM    176  CA  LEU A 310      74.240  47.580  38.380  1.00  0.00           C
ATOM    177  HA  LEU A 310      73.660  47.770  39.280  1.00  0.00           H
ATOM    178  CB  LEU A 310      73.670  46.220  37.910  1.00  0.00           C
ATOM    179  HB1 LEU A 310      73.950  45.430  38.610  1.00  0.00           H
ATOM    180  HB2 LEU A 310      74.270  45.980  37.040  1.00  0.00           H
ATOM    181  CG  LEU A 310      72.140  46.210  37.660  1.00  0.00           C
ATOM    182  HG  LEU A 310      71.870  46.970  36.930  1.00  0.00           H
ATOM    183  CD1 LEU A 310      71.650  44.910  37.020  1.00  0.00           C
ATOM    184 1HD1 LEU A 310      72.010  44.160  37.730  1.00  0.00           H
ATOM    185 2HD1 LEU A 310      70.570  44.890  36.950  1.00  0.00           H
ATOM    186 3HD1 LEU A 310      71.960  44.930  35.970  1.00  0.00           H
ATOM    187  CD2 LEU A 310      71.420  46.360  38.990  1.00  0.00           C
ATOM    188 1HD2 LEU A 310      71.920  45.840  39.800  1.00  0.00           H
ATOM    189 2HD2 LEU A 310      71.410  47.430  39.220  1.00  0.00           H
ATOM    190 3HD2 LEU A 310      70.400  46.000  38.810  1.00  0.00           H
ATOM    191  C   LEU A 310      75.820  47.590  38.590  1.00  0.00           C
ATOM    192  O   LEU A 310      76.330  46.590  39.180  1.00  0.00           O
ATOM    193  N   VAL A 311      76.550  48.560  38.020  1.00  0.00           N
ATOM    194  H   VAL A 311      76.130  49.210  37.370  1.00  0.00           H
ATOM    195  CA  VAL A 311      78.000  48.670  38.250  1.00  0.00           C
ATOM    196  HA  VAL A 311      78.170  48.160  39.200  1.00  0.00           H
ATOM    197  CB  VAL A 311      78.890  48.070  37.130  1.00  0.00           C
ATOM    198  HB  VAL A 311      79.890  48.070  37.580  1.00  0.00           H
ATOM    199  CG1 VAL A 311      78.520  46.630  36.840  1.00  0.00           C
ATOM    200 1HG1 VAL A 311      77.610  46.410  36.280  1.00  0.00           H
ATOM    201 2HG1 VAL A 311      79.300  46.150  36.260  1.00  0.00           H
ATOM    202 3HG1 VAL A 311      78.480  46.070  37.780  1.00  0.00           H
ATOM    203  CG2 VAL A 311      79.010  48.930  35.860  1.00  0.00           C
ATOM    204 1HG2 VAL A 311      78.020  49.320  35.600  1.00  0.00           H
ATOM    205 2HG2 VAL A 311      79.620  49.810  36.050  1.00  0.00           H
ATOM    206 3HG2 VAL A 311      79.430  48.260  35.110  1.00  0.00           H
ATOM    207  C   VAL A 311      78.520  50.130  38.580  1.00  0.00           C
ATOM    208  O   VAL A 311      79.540  50.340  39.200  1.00  0.00           O
ATOM    209  N   VAL A 312      77.880  51.240  38.030  1.00  0.00           N
ATOM    210  H   VAL A 312      77.130  51.080  37.380  1.00  0.00           H
ATOM    211  CA  VAL A 312      78.310  52.650  38.220  1.00  0.00           C
ATOM    212  HA  VAL A 312      79.400  52.640  38.310  1.00  0.00           H
ATOM    213  CB  VAL A 312      77.750  53.590  37.090  1.00  0.00           C
ATOM    214  HB  VAL A 312      78.080  54.600  37.320  1.00  0.00           H
ATOM    215  CG1 VAL A 312      78.390  53.170  35.780  1.00  0.00           C
ATOM    216 1HG1 VAL A 312      78.280  53.970  35.040  1.00  0.00           H
ATOM    217 2HG1 VAL A 312      79.440  52.940  35.980  1.00  0.00           H
ATOM    218 3HG1 VAL A 312      77.850  52.270  35.480  1.00  0.00           H
ATOM    219  CG2 VAL A 312      76.320  53.640  37.090  1.00  0.00           C
ATOM    220 1HG2 VAL A 312      75.970  54.400  36.390  1.00  0.00           H
ATOM    221 2HG2 VAL A 312      75.890  52.650  36.970  1.00  0.00           H
ATOM    222 3HG2 VAL A 312      76.050  53.970  38.090  1.00  0.00           H
ATOM    223  C   VAL A 312      77.930  53.210  39.610  1.00  0.00           C
ATOM    224  O   VAL A 312      76.890  52.870  40.120  1.00  0.00           O
ATOM    225  N   ASP A 313      78.750  54.130  40.190  1.00  0.00           N
ATOM    226  H   ASP A 313      79.430  54.590  39.600  1.00  0.00           H
ATOM    227  CA  ASP A 313      78.560  54.650  41.500  1.00  0.00           C
ATOM    228  HA  ASP A 313      78.210  53.760  42.030  1.00  0.00           H
ATOM    229  CB  ASP A 313      79.830  55.230  42.170  1.00  0.00           C
ATOM    230  HB1 ASP A 313      79.720  55.230  43.260  1.00  0.00           H
ATOM    231  HB2 ASP A 313      80.080  56.200  41.730  1.00  0.00           H
ATOM    232  CG  ASP A 313      80.960  54.260  42.020  1.00  0.00           C
ATOM    233  OD1 ASP A 313      80.840  53.050  42.210  1.00  0.00           O
ATOM    234  OD2 ASP A 313      82.050  54.740  41.780  1.00  0.00           O
ATOM    235  C   ASP A 313      77.450  55.730  41.580  1.00  0.00           C
ATOM    236  O   ASP A 313      77.050  56.200  40.480  1.00  0.00           O
ATOM    237  N   PRO A 314      76.910  56.130  42.730  1.00  0.00           N
ATOM    238  CD  PRO A 314      76.970  55.460  44.090  1.00  0.00           C
ATOM    239  HD1 PRO A 314      77.480  55.960  44.920  1.00  0.00           H
ATOM    240  HD2 PRO A 314      77.340  54.440  44.010  1.00  0.00           H
ATOM    241  CG  PRO A 314      75.470  55.400  44.450  1.00  0.00           C
ATOM    242  HG1 PRO A 314      75.220  55.110  45.470  1.00  0.00           H
ATOM    243  HG2 PRO A 314      74.910  54.740  43.790  1.00  0.00           H
ATOM    244  CB  PRO A 314      74.990  56.810  44.090  1.00  0.00           C
ATOM    245  HB1 PRO A 314      75.350  57.400  44.920  1.00  0.00           H
ATOM    246  HB2 PRO A 314      73.910  56.850  43.900  1.00  0.00           H
ATOM    247  CA  PRO A 314      75.780  57.100  42.840  1.00  0.00           C
ATOM    248  HA  PRO A 314      75.110  56.840  42.020  1.00  0.00           H
ATOM    249  C   PRO A 314      76.090  58.590  42.870  1.00  0.00           C
ATOM    250  O   PRO A 314      77.190  59.050  43.280  1.00  0.00           O
ATOM    251  N   GLY A 315      75.150  59.460  42.500  1.00  0.00           N
ATOM    252  H   GLY A 315      74.340  59.060  42.050  1.00  0.00           H
ATOM    253  CA  GLY A 315      75.330  60.950  42.500  1.00  0.00           C
ATOM    254  HA1 GLY A 315      75.880  61.170  43.420  1.00  0.00           H
ATOM    255  HA2 GLY A 315      74.420  61.540  42.620  1.00  0.00           H
ATOM    256  C   GLY A 315      76.170  61.480  41.290  1.00  0.00           C
ATOM    257  O   GLY A 315      76.630  60.760  40.430  1.00  0.00           O
ATOM    258  N   ASP A 316      76.360  62.790  41.290  1.00  0.00           N
ATOM    259  H   ASP A 316      75.910  63.340  42.010  1.00  0.00           H
ATOM    260  CA  ASP A 316      77.140  63.570  40.240  1.00  0.00           C
ATOM    261  HA  ASP A 316      76.940  63.020  39.320  1.00  0.00           H
ATOM    262  CB  ASP A 316      76.600  65.040  40.190  1.00  0.00           C
ATOM    263  HB1 ASP A 316      76.870  65.580  41.100  1.00  0.00           H
ATOM    264  HB2 ASP A 316      75.510  64.940  40.200  1.00  0.00           H
ATOM    265  CG  ASP A 316      76.890  65.750  38.930  1.00  0.00           C
ATOM    266  OD1 ASP A 316      76.310  66.830  38.610  1.00  0.00           O
ATOM    267  OD2 ASP A 316      77.760  65.270  38.130  1.00  0.00           O
ATOM    268  C   ASP A 316      78.630  63.620  40.570  1.00  0.00           C
ATOM    269  O   ASP A 316      79.050  64.260  41.520  1.00  0.00           O
ATOM    270  N   PRO A 317      79.510  63.170  39.640  1.00  0.00           N
ATOM    271  CD  PRO A 317      79.140  62.290  38.490  1.00  0.00           C
ATOM    272  HD1 PRO A 317      78.360  62.690  37.850  1.00  0.00           H
ATOM    273  HD2 PRO A 317      78.770  61.300  38.760  1.00  0.00           H
ATOM    274  CG  PRO A 317      80.410  62.220  37.660  1.00  0.00           C
ATOM    275  HG1 PRO A 317      80.360  63.020  36.930  1.00  0.00           H
ATOM    276  HG2 PRO A 317      80.490  61.280  37.120  1.00  0.00           H
ATOM    277  CB  PRO A 317      81.540  62.460  38.630  1.00  0.00           C
ATOM    278  HB1 PRO A 317      82.430  62.910  38.180  1.00  0.00           H
ATOM    279  HB2 PRO A 317      81.820  61.500  39.070  1.00  0.00           H
ATOM    280  CA  PRO A 317      80.970  63.310  39.780  1.00  0.00           C
ATOM    281  HA  PRO A 317      81.240  62.950  40.770  1.00  0.00           H
ATOM    282  C   PRO A 317      81.460  64.760  39.640  1.00  0.00           C
ATOM    283  O   PRO A 317      82.520  65.100  40.130  1.00  0.00           O
ATOM    284  N   ARG A 318      80.650  65.710  39.030  1.00  0.00           N
ATOM    285  H   ARG A 318      79.780  65.410  38.600  1.00  0.00           H
ATOM    286  CA  ARG A 318      81.000  67.160  38.840  1.00  0.00           C
ATOM    287  HA  ARG A 318      82.020  67.350  38.500  1.00  0.00           H
ATOM    288  CB  ARG A 318      79.970  67.740  37.770  1.00  0.00           C
ATOM    289  HB1 ARG A 318      80.000  68.830  37.690  1.00  0.00           H
ATOM    290  HB2 ARG A 318      78.980  67.520  38.160  1.00  0.00           H
ATOM    291  CG  ARG A 318      80.160  67.130  36.420  1.00  0.00           C
ATOM    292  HG1 ARG A 318      80.040  66.050  36.560  1.00  0.00           H
ATOM    293  HG2 ARG A 318      81.120  67.450  36.030  1.00  0.00           H
ATOM    294  CD  ARG A 318      79.100  67.540  35.400  1.00  0.00           C
ATOM    295  HD1 ARG A 318      79.370  67.300  34.380  1.00  0.00           H
ATOM    296  HD2 ARG A 318      79.120  68.630  35.490  1.00  0.00           H
ATOM    297  NE  ARG A 318      77.890  66.790  35.720  1.00  0.00           N
ATOM    298  HE  ARG A 318      77.750  66.580  36.700  1.00  0.00           H
ATOM    299  CZ  ARG A 318      76.860  66.670  34.910  1.00  0.00           C
ATOM    300  NH1 ARG A 318      76.910  66.950  33.650  1.00  0.00           N
ATOM    301 1HH1 ARG A 318      77.750  67.240  33.180  1.00  0.00           H
ATOM    302 2HH1 ARG A 318      76.030  66.900  33.160  1.00  0.00           H
ATOM    303  NH2 ARG A 318      75.710  66.330  35.470  1.00  0.00           N
ATOM    304 1HH2 ARG A 318      75.650  66.000  36.420  1.00  0.00           H
ATOM    305 2HH2 ARG A 318      74.910  66.330  34.850  1.00  0.00           H
ATOM    306  C   ARG A 318      80.910  67.950  40.150  1.00  0.00           C
ATOM    307  O   ARG A 318      81.220  69.160  40.220  1.00  0.00           O
ATOM    308  N   SER A 319      80.430  67.260  41.180  1.00  0.00           N
ATOM    309  H   SER A 319      80.130  66.330  40.930  1.00  0.00           H
ATOM    310  CA  SER A 319      80.390  67.760  42.530  1.00  0.00           C
ATOM    311  HA  SER A 319      80.550  68.840  42.540  1.00  0.00           H
ATOM    312  CB  SER A 319      79.070  67.470  43.160  1.00  0.00           C
ATOM    313  HB1 SER A 319      79.040  67.760  44.210  1.00  0.00           H
ATOM    314  HB2 SER A 319      79.030  66.390  43.150  1.00  0.00           H
ATOM    315  OG  SER A 319      78.080  68.010  42.220  1.00  0.00           O
ATOM    316  HG  SER A 319      77.280  67.560  42.490  1.00  0.00           H
ATOM    317  C   SER A 319      81.550  67.190  43.390  1.00  0.00           C
ATOM    318  O   SER A 319      81.570  67.490  44.570  1.00  0.00           O
ATOM    319  N   TYR A 320      82.490  66.510  42.760  1.00  0.00           N
ATOM    320  H   TYR A 320      82.430  66.430  41.750  1.00  0.00           H
ATOM    321  CA  TYR A 320      83.800  66.330  43.400  1.00  0.00           C
ATOM    322  HA  TYR A 320      83.860  67.160  44.110  1.00  0.00           H
ATOM    323  CB  TYR A 320      83.940  65.060  44.220  1.00  0.00           C
ATOM    324  HB1 TYR A 320      83.030  64.850  44.770  1.00  0.00           H
ATOM    325  HB2 TYR A 320      84.790  65.130  44.900  1.00  0.00           H
ATOM    326  CG  TYR A 320      84.210  63.840  43.370  1.00  0.00           C
ATOM    327  CD1 TYR A 320      85.520  63.410  43.080  1.00  0.00           C
ATOM    328  HD1 TYR A 320      86.330  63.970  43.540  1.00  0.00           H
ATOM    329  CE1 TYR A 320      85.770  62.250  42.350  1.00  0.00           C
ATOM    330  HE1 TYR A 320      86.770  61.870  42.190  1.00  0.00           H
ATOM    331  CZ  TYR A 320      84.750  61.440  41.930  1.00  0.00           C
ATOM    332  OH  TYR A 320      84.920  60.350  41.120  1.00  0.00           O
ATOM    333  HH  TYR A 320      84.130  59.810  41.110  1.00  0.00           H
ATOM    334  CE2 TYR A 320      83.430  61.870  42.250  1.00  0.00           C
ATOM    335  HE2 TYR A 320      82.590  61.270  41.920  1.00  0.00           H
ATOM    336  CD2 TYR A 320      83.150  63.060  42.920  1.00  0.00           C
ATOM    337  HD2 TYR A 320      82.110  63.280  43.140  1.00  0.00           H
ATOM    338  C   TYR A 320      84.930  66.560  42.450  1.00  0.00           C
ATOM    339  O   TYR A 320      86.030  66.810  42.840  1.00  0.00           O
ATOM    340  N   LEU A 321      84.710  66.450  41.130  1.00  0.00           N
ATOM    341  H   LEU A 321      83.860  66.060  40.760  1.00  0.00           H
ATOM    342  CA  LEU A 321      85.750  66.720  40.130  1.00  0.00           C
ATOM    343  HA  LEU A 321      86.730  66.590  40.580  1.00  0.00           H
ATOM    344  CB  LEU A 321      85.660  65.670  38.950  1.00  0.00           C
ATOM    345  HB1 LEU A 321      86.380  65.960  38.180  1.00  0.00           H
ATOM    346  HB2 LEU A 321      84.640  65.760  38.570  1.00  0.00           H
ATOM    347  CG  LEU A 321      85.810  64.190  39.440  1.00  0.00           C
ATOM    348  HG  LEU A 321      85.120  63.910  40.230  1.00  0.00           H
ATOM    349  CD1 LEU A 321      85.570  63.180  38.350  1.00  0.00           C
ATOM    350 1HD1 LEU A 321      85.640  62.180  38.790  1.00  0.00           H
ATOM    351 2HD1 LEU A 321      84.580  63.210  37.890  1.00  0.00           H
ATOM    352 3HD1 LEU A 321      86.340  63.310  37.590  1.00  0.00           H
ATOM    353  CD2 LEU A 321      87.300  64.190  39.880  1.00  0.00           C
ATOM    354 1HD2 LEU A 321      87.610  63.170  40.110  1.00  0.00           H
ATOM    355 2HD2 LEU A 321      87.970  64.470  39.070  1.00  0.00           H
ATOM    356 3HD2 LEU A 321      87.500  64.840  40.730  1.00  0.00           H
ATOM    357  C   LEU A 321      85.530  68.110  39.420  1.00  0.00           C
ATOM    358  O   LEU A 321      84.400  68.580  39.290  1.00  0.00           O
ATOM    359  N   ASP A 322      86.500  68.690  38.820  1.00  0.00           N
ATOM    360  H   ASP A 322      87.420  68.400  39.130  1.00  0.00           H
ATOM    361  CA  ASP A 322      86.390  69.960  38.040  1.00  0.00           C
ATOM    362  HA  ASP A 322      85.400  70.110  37.590  1.00  0.00           H
ATOM    363  CB  ASP A 322      86.710  71.250  38.870  1.00  0.00           C
ATOM    364  HB1 ASP A 322      86.620  72.130  38.230  1.00  0.00           H
ATOM    365  HB2 ASP A 322      87.720  71.170  39.290  1.00  0.00           H
ATOM    366  CG  ASP A 322      85.730  71.490  40.100  1.00  0.00           C
ATOM    367  OD1 ASP A 322      86.200  71.450  41.280  1.00  0.00           O
ATOM    368  OD2 ASP A 322      84.590  71.910  39.740  1.00  0.00           O
ATOM    369  C   ASP A 322      87.340  69.940  36.760  1.00  0.00           C
ATOM    370  O   ASP A 322      88.150  69.040  36.600  1.00  0.00           O
ATOM    371  N   ASN A 323      87.320  71.060  36.070  1.00  0.00           N
ATOM    372  H   ASN A 323      86.660  71.720  36.460  1.00  0.00           H
ATOM    373  CA  ASN A 323      88.260  71.510  34.990  1.00  0.00           C
ATOM    374  HA  ASN A 323      87.820  72.460  34.670  1.00  0.00           H
ATOM    375  CB  ASN A 323      89.660  71.710  35.640  1.00  0.00           C
ATOM    376  HB1 ASN A 323      90.310  72.150  34.880  1.00  0.00           H
ATOM    377  HB2 ASN A 323      90.110  70.780  35.970  1.00  0.00           H
ATOM    378  CG  ASN A 323      89.510  72.560  36.900  1.00  0.00           C
ATOM    379  OD1 ASN A 323      90.050  72.230  37.990  1.00  0.00           O
ATOM    380  ND2 ASN A 323      88.930  73.720  36.800  1.00  0.00           N
ATOM    381 1HD2 ASN A 323      88.550  73.990  35.900  1.00  0.00           H
ATOM    382 2HD2 ASN A 323      89.140  74.350  37.570  1.00  0.00           H
ATOM    383  C   ASN A 323      88.240  70.640  33.650  1.00  0.00           C
ATOM    384  O   ASN A 323      88.270  71.350  32.630  1.00  0.00           O
ATOM    385  N   PHE A 324      88.170  69.310  33.720  1.00  0.00           N
ATOM    386  H   PHE A 324      88.240  68.820  34.600  1.00  0.00           H
ATOM    387  CA  PHE A 324      87.870  68.430  32.590  1.00  0.00           C
ATOM    388  HA  PHE A 324      88.120  67.400  32.820  1.00  0.00           H
ATOM    389  CB  PHE A 324      86.310  68.450  32.350  1.00  0.00           C
ATOM    390  HB1 PHE A 324      86.020  67.880  31.470  1.00  0.00           H
ATOM    391  HB2 PHE A 324      85.920  69.450  32.130  1.00  0.00           H
ATOM    392  CG  PHE A 324      85.590  67.850  33.500  1.00  0.00           C
ATOM    393  CD1 PHE A 324      85.700  66.480  33.690  1.00  0.00           C
ATOM    394  HD1 PHE A 324      86.280  65.820  33.070  1.00  0.00           H
ATOM    395  CE1 PHE A 324      85.060  65.830  34.790  1.00  0.00           C
ATOM    396  HE1 PHE A 324      85.130  64.780  35.040  1.00  0.00           H
ATOM    397  CZ  PHE A 324      84.240  66.640  35.640  1.00  0.00           C
ATOM    398  HZ  PHE A 324      83.740  66.190  36.480  1.00  0.00           H
ATOM    399  CE2 PHE A 324      84.100  68.040  35.350  1.00  0.00           C
ATOM    400  HE2 PHE A 324      83.580  68.710  36.020  1.00  0.00           H
ATOM    401  CD2 PHE A 324      84.730  68.680  34.270  1.00  0.00           C
ATOM    402  HD2 PHE A 324      84.620  69.760  34.220  1.00  0.00           H
ATOM    403  C   PHE A 324      88.710  68.720  31.310  1.00  0.00           C
ATOM    404  O   PHE A 324      88.150  68.810  30.160  1.00  0.00           O
ATOM    405  N   ILE A 325      90.050  68.830  31.400  1.00  0.00           N
ATOM    406  H   ILE A 325      90.400  68.620  32.330  1.00  0.00           H
ATOM    407  CA  ILE A 325      91.040  69.210  30.310  1.00  0.00           C
ATOM    408  HA  ILE A 325      90.680  70.000  29.660  1.00  0.00           H
ATOM    409  CB  ILE A 325      92.330  69.770  30.980  1.00  0.00           C
ATOM    410  HB  ILE A 325      92.860  68.940  31.440  1.00  0.00           H
ATOM    411  CG2 ILE A 325      93.210  70.340  29.810  1.00  0.00           C
ATOM    412 1HG2 ILE A 325      92.590  70.940  29.140  1.00  0.00           H
ATOM    413 2HG2 ILE A 325      94.150  70.830  30.060  1.00  0.00           H
ATOM    414 3HG2 ILE A 325      93.490  69.530  29.140  1.00  0.00           H
ATOM    415  CG1 ILE A 325      92.040  70.780  32.130  1.00  0.00           C
ATOM    416 1HG1 ILE A 325      93.020  70.960  32.560  1.00  0.00           H
ATOM    417 2HG1 ILE A 325      91.500  70.360  32.980  1.00  0.00           H
ATOM    418  CD  ILE A 325      91.460  72.120  31.740  1.00  0.00           C
ATOM    419  HD1 ILE A 325      91.020  72.720  32.530  1.00  0.00           H
ATOM    420  HD2 ILE A 325      92.310  72.680  31.350  1.00  0.00           H
ATOM    421  HD3 ILE A 325      90.650  71.920  31.030  1.00  0.00           H
ATOM    422  C   ILE A 325      91.330  68.030  29.370  1.00  0.00           C
ATOM    423  O   ILE A 325      91.970  67.050  29.780  1.00  0.00           O
ATOM    424  N   LYS A 326      90.890  67.970  28.070  1.00  0.00           N
ATOM    425  H   LYS A 326      90.220  68.670  27.800  1.00  0.00           H
ATOM    426  CA  LYS A 326      91.060  66.840  27.180  1.00  0.00           C
ATOM    427  HA  LYS A 326      90.800  65.910  27.690  1.00  0.00           H
ATOM    428  CB  LYS A 326      90.170  67.030  25.880  1.00  0.00           C
ATOM    429  HB1 LYS A 326      90.750  67.600  25.160  1.00  0.00           H
ATOM    430  HB2 LYS A 326      89.190  67.440  26.110  1.00  0.00           H
ATOM    431  CG  LYS A 326      89.890  65.730  25.140  1.00  0.00           C
ATOM    432  HG1 LYS A 326      89.180  65.160  25.750  1.00  0.00           H
ATOM    433  HG2 LYS A 326      90.800  65.160  24.930  1.00  0.00           H
ATOM    434  CD  LYS A 326      89.160  66.050  23.790  1.00  0.00           C
ATOM    435  HD1 LYS A 326      89.470  67.030  23.410  1.00  0.00           H
ATOM    436  HD2 LYS A 326      88.070  65.990  23.800  1.00  0.00           H
ATOM    437  CE  LYS A 326      89.590  65.040  22.720  1.00  0.00           C
ATOM    438  HE1 LYS A 326      89.530  64.100  23.260  1.00  0.00           H
ATOM    439  HE2 LYS A 326      90.600  65.310  22.390  1.00  0.00           H
ATOM    440  NZ  LYS A 326      88.730  65.080  21.500  1.00  0.00           N
ATOM    441  HZ1 LYS A 326      89.150  64.650  20.680  1.00  0.00           H
ATOM    442  HZ2 LYS A 326      87.800  64.690  21.570  1.00  0.00           H
ATOM    443  HZ3 LYS A 326      88.580  66.030  21.200  1.00  0.00           H
ATOM    444  C   LYS A 326      92.490  66.550  26.820  1.00  0.00           C
ATOM    445  O   LYS A 326      93.250  67.540  26.660  1.00  0.00           O
ATOM    446  N   ILE A 327      92.970  65.300  26.700  1.00  0.00           N
ATOM    447  H   ILE A 327      92.320  64.560  26.940  1.00  0.00           H
ATOM    448  CA  ILE A 327      94.340  64.860  26.500  1.00  0.00           C
ATOM    449  HA  ILE A 327      94.910  65.680  26.060  1.00  0.00           H
ATOM    450  CB  ILE A 327      95.050  64.430  27.800  1.00  0.00           C
ATOM    451  HB  ILE A 327      96.070  64.190  27.530  1.00  0.00           H
ATOM    452  CG2 ILE A 327      95.130  65.620  28.750  1.00  0.00           C
ATOM    453 1HG2 ILE A 327      95.290  66.530  28.170  1.00  0.00           H
ATOM    454 2HG2 ILE A 327      94.130  65.750  29.150  1.00  0.00           H
ATOM    455 3HG2 ILE A 327      95.850  65.520  29.570  1.00  0.00           H
ATOM    456  CG1 ILE A 327      94.440  63.130  28.460  1.00  0.00           C
ATOM    457 1HG1 ILE A 327      94.730  62.280  27.840  1.00  0.00           H
ATOM    458 2HG1 ILE A 327      93.350  63.140  28.510  1.00  0.00           H
ATOM    459  CD  ILE A 327      94.910  62.860  29.820  1.00  0.00           C
ATOM    460  HD1 ILE A 327      95.980  62.690  29.900  1.00  0.00           H
ATOM    461  HD2 ILE A 327      94.640  63.690  30.470  1.00  0.00           H
ATOM    462  HD3 ILE A 327      94.370  61.960  30.120  1.00  0.00           H
ATOM    463  C   ILE A 327      94.400  63.670  25.480  1.00  0.00           C
ATOM    464  O   ILE A 327      95.450  63.210  25.090  1.00  0.00           O
ATOM    465  N   GLY A 328      93.240  63.100  25.060  1.00  0.00           N
ATOM    466  H   GLY A 328      92.340  63.500  25.280  1.00  0.00           H
ATOM    467  CA  GLY A 328      93.170  62.020  24.080  1.00  0.00           C
ATOM    468  HA1 GLY A 328      93.420  61.110  24.620  1.00  0.00           H
ATOM    469  HA2 GLY A 328      93.970  62.160  23.350  1.00  0.00           H
ATOM    470  C   GLY A 328      91.760  61.680  23.550  1.00  0.00           C
ATOM    471  O   GLY A 328      90.770  62.320  24.040  1.00  0.00           O
ATOM    472  N   GLU A 329      91.740  60.700  22.660  1.00  0.00           N
ATOM    473  H   GLU A 329      92.640  60.340  22.390  1.00  0.00           H
ATOM    474  CA  GLU A 329      90.590  60.150  21.960  1.00  0.00           C
ATOM    475  HA  GLU A 329      89.900  59.850  22.740  1.00  0.00           H
ATOM    476  CB  GLU A 329      90.070  61.290  21.030  1.00  0.00           C
ATOM    477  HB1 GLU A 329      89.760  62.210  21.540  1.00  0.00           H
ATOM    478  HB2 GLU A 329      89.110  60.910  20.680  1.00  0.00           H
ATOM    479  CG  GLU A 329      90.990  61.720  19.840  1.00  0.00           C
ATOM    480  HG1 GLU A 329      91.230  60.810  19.280  1.00  0.00           H
ATOM    481  HG2 GLU A 329      91.880  62.120  20.330  1.00  0.00           H
ATOM    482  CD  GLU A 329      90.400  62.710  18.910  1.00  0.00           C
ATOM    483  OE1 GLU A 329      90.240  62.400  17.680  1.00  0.00           O
ATOM    484  OE2 GLU A 329      89.970  63.730  19.450  1.00  0.00           O
ATOM    485  C   GLU A 329      90.900  58.890  21.100  1.00  0.00           C
ATOM    486  O   GLU A 329      92.000  58.450  20.810  1.00  0.00           O
ATOM    487  N   GLY A 330      89.770  58.270  20.640  1.00  0.00           N
ATOM    488  H   GLY A 330      88.880  58.720  20.770  1.00  0.00           H
ATOM    489  CA  GLY A 330      89.790  57.000  19.920  1.00  0.00           C
ATOM    490  HA1 GLY A 330      90.240  56.320  20.650  1.00  0.00           H
ATOM    491  HA2 GLY A 330      90.480  57.140  19.090  1.00  0.00           H
ATOM    492  C   GLY A 330      88.390  56.550  19.540  1.00  0.00           C
ATOM    493  O   GLY A 330      87.430  57.310  19.590  1.00  0.00           O
ATOM    494  N   SER A 331      88.230  55.220  19.370  1.00  0.00           N
ATOM    495  H   SER A 331      88.910  54.480  19.490  1.00  0.00           H
ATOM    496  CA  SER A 331      86.990  54.810  18.780  1.00  0.00           C
ATOM    497  HA  SER A 331      86.590  55.600  18.140  1.00  0.00           H
ATOM    498  CB  SER A 331      87.310  53.670  17.760  1.00  0.00           C
ATOM    499  HB1 SER A 331      88.100  53.970  17.080  1.00  0.00           H
ATOM    500  HB2 SER A 331      86.370  53.510  17.220  1.00  0.00           H
ATOM    501  OG  SER A 331      87.700  52.500  18.490  1.00  0.00           O
ATOM    502  HG  SER A 331      88.610  52.380  18.190  1.00  0.00           H
ATOM    503  C   SER A 331      85.820  54.550  19.690  1.00  0.00           C
ATOM    504  O   SER A 331      84.700  54.400  19.230  1.00  0.00           O
ATOM    505  N   THR A 332      86.000  54.620  21.020  1.00  0.00           N
ATOM    506  H   THR A 332      86.950  54.660  21.360  1.00  0.00           H
ATOM    507  CA  THR A 332      84.890  54.650  22.040  1.00  0.00           C
ATOM    508  HA  THR A 332      83.950  54.310  21.610  1.00  0.00           H
ATOM    509  CB  THR A 332      85.140  53.550  23.090  1.00  0.00           C
ATOM    510  HB  THR A 332      84.430  53.680  23.910  1.00  0.00           H
ATOM    511  CG2 THR A 332      85.000  52.080  22.600  1.00  0.00           C
ATOM    512 1HG2 THR A 332      85.590  51.920  21.700  1.00  0.00           H
ATOM    513 2HG2 THR A 332      85.400  51.350  23.290  1.00  0.00           H
ATOM    514 3HG2 THR A 332      83.970  51.730  22.460  1.00  0.00           H
ATOM    515  OG1 THR A 332      86.500  53.600  23.640  1.00  0.00           O
ATOM    516  HG1 THR A 332      86.740  52.710  23.910  1.00  0.00           H
ATOM    517  C   THR A 332      84.770  55.980  22.800  1.00  0.00           C
ATOM    518  O   THR A 332      83.680  56.200  23.300  1.00  0.00           O
ATOM    519  N   GLY A 333      85.800  56.810  22.880  1.00  0.00           N
ATOM    520  H   GLY A 333      86.660  56.640  22.380  1.00  0.00           H
ATOM    521  CA  GLY A 333      85.620  58.130  23.450  1.00  0.00           C
ATOM    522  HA1 GLY A 333      85.190  57.920  24.430  1.00  0.00           H
ATOM    523  HA2 GLY A 333      84.770  58.550  22.900  1.00  0.00           H
ATOM    524  C   GLY A 333      86.790  59.060  23.540  1.00  0.00           C
ATOM    525  O   GLY A 333      87.590  58.970  22.630  1.00  0.00           O
ATOM    526  N   ILE A 334      86.810  59.860  24.650  1.00  0.00           N
ATOM    527  H   ILE A 334      86.020  59.820  25.290  1.00  0.00           H
ATOM    528  CA  ILE A 334      87.810  60.940  24.870  1.00  0.00           C
ATOM    529  HA  ILE A 334      88.600  60.780  24.140  1.00  0.00           H
ATOM    530  CB  ILE A 334      87.310  62.390  24.760  1.00  0.00           C
ATOM    531  HB  ILE A 334      88.130  63.070  24.970  1.00  0.00           H
ATOM    532  CG2 ILE A 334      86.730  62.660  23.370  1.00  0.00           C
ATOM    533 1HG2 ILE A 334      86.610  63.740  23.220  1.00  0.00           H
ATOM    534 2HG2 ILE A 334      87.330  62.290  22.540  1.00  0.00           H
ATOM    535 3HG2 ILE A 334      85.790  62.130  23.260  1.00  0.00           H
ATOM    536  CG1 ILE A 334      86.240  62.560  25.900  1.00  0.00           C
ATOM    537 1HG1 ILE A 334      86.800  62.300  26.800  1.00  0.00           H
ATOM    538 2HG1 ILE A 334      85.370  61.920  25.750  1.00  0.00           H
ATOM    539  CD  ILE A 334      85.680  64.030  26.040  1.00  0.00           C
ATOM    540  HD1 ILE A 334      86.490  64.750  26.140  1.00  0.00           H
ATOM    541  HD2 ILE A 334      85.080  64.230  25.150  1.00  0.00           H
ATOM    542  HD3 ILE A 334      84.980  64.020  26.880  1.00  0.00           H
ATOM    543  C   ILE A 334      88.510  60.610  26.220  1.00  0.00           C
ATOM    544  O   ILE A 334      87.960  59.880  27.030  1.00  0.00           O
ATOM    545  N   VAL A 335      89.700  61.220  26.550  1.00  0.00           N
ATOM    546  H   VAL A 335      90.090  61.830  25.840  1.00  0.00           H
ATOM    547  CA  VAL A 335      90.310  61.240  27.840  1.00  0.00           C
ATOM    548  HA  VAL A 335      89.580  60.900  28.570  1.00  0.00           H
ATOM    549  CB  VAL A 335      91.630  60.330  27.770  1.00  0.00           C
ATOM    550  HB  VAL A 335      92.480  60.860  27.330  1.00  0.00           H
ATOM    551  CG1 VAL A 335      91.940  59.990  29.260  1.00  0.00           C
ATOM    552 1HG1 VAL A 335      92.890  59.460  29.320  1.00  0.00           H
ATOM    553 2HG1 VAL A 335      92.000  60.870  29.900  1.00  0.00           H
ATOM    554 3HG1 VAL A 335      91.110  59.380  29.640  1.00  0.00           H
ATOM    555  CG2 VAL A 335      91.560  58.950  27.130  1.00  0.00           C
ATOM    556 1HG2 VAL A 335      90.780  58.430  27.690  1.00  0.00           H
ATOM    557 2HG2 VAL A 335      91.330  58.970  26.070  1.00  0.00           H
ATOM    558 3HG2 VAL A 335      92.470  58.390  27.350  1.00  0.00           H
ATOM    559  C   VAL A 335      90.620  62.620  28.230  1.00  0.00           C
ATOM    560  O   VAL A 335      90.950  63.470  27.490  1.00  0.00           O
ATOM    561  N   CYS A 336      90.480  62.900  29.580  1.00  0.00           N
ATOM    562  H   CYS A 336      90.040  62.170  30.130  1.00  0.00           H
ATOM    563  CA  CYS A 336      90.770  64.260  30.130  1.00  0.00           C
ATOM    564  HA  CYS A 336      91.450  64.790  29.460  1.00  0.00           H
ATOM    565  CB  CYS A 336      89.470  65.130  30.080  1.00  0.00           C
ATOM    566  HB1 CYS A 336      89.160  65.150  29.040  1.00  0.00           H
ATOM    567  HB2 CYS A 336      89.690  66.160  30.340  1.00  0.00           H
ATOM    568  SG  CYS A 336      88.060  64.570  31.080  1.00  0.00           S
ATOM    569  HG  CYS A 336      88.240  63.280  30.780  1.00  0.00           H
ATOM    570  C   CYS A 336      91.380  64.250  31.510  1.00  0.00           C
ATOM    571  O   CYS A 336      91.260  63.210  32.170  1.00  0.00           O
ATOM    572  N   ILE A 337      91.960  65.370  31.960  1.00  0.00           N
ATOM    573  H   ILE A 337      92.000  66.120  31.290  1.00  0.00           H
ATOM    574  CA  ILE A 337      92.370  65.630  33.380  1.00  0.00           C
ATOM    575  HA  ILE A 337      92.680  64.720  33.870  1.00  0.00           H
ATOM    576  CB  ILE A 337      93.530  66.640  33.340  1.00  0.00           C
ATOM    577  HB  ILE A 337      93.090  67.560  32.960  1.00  0.00           H
ATOM    578  CG2 ILE A 337      94.140  66.930  34.750  1.00  0.00           C
ATOM    579 1HG2 ILE A 337      94.690  66.070  35.120  1.00  0.00           H
ATOM    580 2HG2 ILE A 337      94.860  67.750  34.700  1.00  0.00           H
ATOM    581 3HG2 ILE A 337      93.340  67.150  35.470  1.00  0.00           H
ATOM    582  CG1 ILE A 337      94.680  66.150  32.440  1.00  0.00           C
ATOM    583 1HG1 ILE A 337      94.290  65.700  31.520  1.00  0.00           H
ATOM    584 2HG1 ILE A 337      95.280  65.410  32.980  1.00  0.00           H
ATOM    585  CD  ILE A 337      95.600  67.280  32.020  1.00  0.00           C
ATOM    586  HD1 ILE A 337      96.200  66.990  31.160  1.00  0.00           H
ATOM    587  HD2 ILE A 337      94.870  68.010  31.680  1.00  0.00           H
ATOM    588  HD3 ILE A 337      96.220  67.670  32.830  1.00  0.00           H
ATOM    589  C   ILE A 337      91.220  66.340  34.130  1.00  0.00           C
ATOM    590  O   ILE A 337      90.650  67.290  33.660  1.00  0.00           O
ATOM    591  N   ALA A 338      91.040  66.000  35.430  1.00  0.00           N
ATOM    592  H   ALA A 338      91.660  65.350  35.890  1.00  0.00           H
ATOM    593  CA  ALA A 338      90.080  66.570  36.330  1.00  0.00           C
ATOM    594  HA  ALA A 338      89.660  67.510  35.970  1.00  0.00           H
ATOM    595  CB  ALA A 338      88.920  65.570  36.460  1.00  0.00           C
ATOM    596  HB1 ALA A 338      89.390  64.620  36.700  1.00  0.00           H
ATOM    597  HB2 ALA A 338      88.270  65.960  37.240  1.00  0.00           H
ATOM    598  HB3 ALA A 338      88.320  65.420  35.560  1.00  0.00           H
ATOM    599  C   ALA A 338      90.740  66.940  37.650  1.00  0.00           C
ATOM    600  O   ALA A 338      91.530  66.150  38.130  1.00  0.00           O
ATOM    601  N   THR A 339      90.520  68.090  38.250  1.00  0.00           N
ATOM    602  H   THR A 339      89.760  68.660  37.890  1.00  0.00           H
ATOM    603  CA  THR A 339      91.050  68.440  39.560  1.00  0.00           C
ATOM    604  HA  THR A 339      92.050  68.030  39.670  1.00  0.00           H
ATOM    605  CB  THR A 339      91.170  69.920  39.690  1.00  0.00           C
ATOM    606  HB  THR A 339      90.160  70.320  39.680  1.00  0.00           H
ATOM    607  CG2 THR A 339      91.940  70.290  40.930  1.00  0.00           C
ATOM    608 1HG2 THR A 339      91.400  70.000  41.830  1.00  0.00           H
ATOM    609 2HG2 THR A 339      92.980  69.980  41.050  1.00  0.00           H
ATOM    610 3HG2 THR A 339      91.960  71.380  41.000  1.00  0.00           H
ATOM    611  OG1 THR A 339      91.910  70.450  38.550  1.00  0.00           O
ATOM    612  HG1 THR A 339      91.520  71.330  38.480  1.00  0.00           H
ATOM    613  C   THR A 339      90.070  67.890  40.620  1.00  0.00           C
ATOM    614  O   THR A 339      88.860  68.010  40.450  1.00  0.00           O
ATOM    615  N   VAL A 340      90.620  67.300  41.700  1.00  0.00           N
ATOM    616  H   VAL A 340      91.610  67.320  41.890  1.00  0.00           H
ATOM    617  CA  VAL A 340      89.770  66.930  42.770  1.00  0.00           C
ATOM    618  HA  VAL A 340      88.780  66.700  42.390  1.00  0.00           H
ATOM    619  CB  VAL A 340      90.300  65.620  43.430  1.00  0.00           C
ATOM    620  HB  VAL A 340      91.280  65.890  43.830  1.00  0.00           H
ATOM    621  CG1 VAL A 340      89.390  65.280  44.600  1.00  0.00           C
ATOM    622 1HG1 VAL A 340      88.380  65.070  44.230  1.00  0.00           H
ATOM    623 2HG1 VAL A 340      89.710  64.430  45.190  1.00  0.00           H
ATOM    624 3HG1 VAL A 340      89.430  66.070  45.350  1.00  0.00           H
ATOM    625  CG2 VAL A 340      90.610  64.440  42.550  1.00  0.00           C
ATOM    626 1HG2 VAL A 340      89.720  64.030  42.080  1.00  0.00           H
ATOM    627 2HG2 VAL A 340      91.300  64.760  41.770  1.00  0.00           H
ATOM    628 3HG2 VAL A 340      91.050  63.600  43.100  1.00  0.00           H
ATOM    629  C   VAL A 340      89.620  67.980  43.740  1.00  0.00           C
ATOM    630  O   VAL A 340      90.590  68.490  44.310  1.00  0.00           O
ATOM    631  N   ARG A 341      88.400  68.380  44.080  1.00  0.00           N
ATOM    632  H   ARG A 341      87.640  67.920  43.590  1.00  0.00           H
ATOM    633  CA  ARG A 341      88.060  69.490  45.020  1.00  0.00           C
ATOM    634  HA  ARG A 341      88.680  70.320  44.710  1.00  0.00           H
ATOM    635  CB  ARG A 341      86.550  69.860  44.990  1.00  0.00           C
ATOM    636  HB1 ARG A 341      85.990  69.270  45.720  1.00  0.00           H
ATOM    637  HB2 ARG A 341      86.220  69.510  44.010  1.00  0.00           H
ATOM    638  CG  ARG A 341      86.170  71.370  45.030  1.00  0.00           C
ATOM    639  HG1 ARG A 341      86.630  71.920  44.210  1.00  0.00           H
ATOM    640  HG2 ARG A 341      86.410  71.710  46.040  1.00  0.00           H
ATOM    641  CD  ARG A 341      84.680  71.510  44.840  1.00  0.00           C
ATOM    642  HD1 ARG A 341      84.420  72.550  45.050  1.00  0.00           H
ATOM    643  HD2 ARG A 341      84.140  70.770  45.440  1.00  0.00           H
ATOM    644  NE  ARG A 341      84.360  71.250  43.450  1.00  0.00           N
ATOM    645  HE  ARG A 341      85.160  71.020  42.890  1.00  0.00           H
ATOM    646  CZ  ARG A 341      83.080  71.060  43.020  1.00  0.00           C
ATOM    647  NH1 ARG A 341      82.040  70.940  43.820  1.00  0.00           N
ATOM    648 1HH1 ARG A 341      82.070  70.850  44.830  1.00  0.00           H
ATOM    649 2HH1 ARG A 341      81.080  70.800  43.540  1.00  0.00           H
ATOM    650  NH2 ARG A 341      82.910  70.830  41.770  1.00  0.00           N
ATOM    651 1HH2 ARG A 341      83.640  71.100  41.120  1.00  0.00           H
ATOM    652 2HH2 ARG A 341      81.980  70.680  41.390  1.00  0.00           H
ATOM    653  C   ARG A 341      88.510  69.210  46.470  1.00  0.00           C
ATOM    654  O   ARG A 341      88.580  68.100  46.970  1.00  0.00           O
ATOM    655  N   SER A 342      88.900  70.310  47.140  1.00  0.00           N
ATOM    656  H   SER A 342      88.810  71.200  46.690  1.00  0.00           H
ATOM    657  CA  SER A 342      89.510  70.260  48.540  1.00  0.00           C
ATOM    658  HA  SER A 342      89.830  71.270  48.780  1.00  0.00           H
ATOM    659  CB  SER A 342      88.510  69.800  49.620  1.00  0.00           C
ATOM    660  HB1 SER A 342      88.880  69.910  50.630  1.00  0.00           H
ATOM    661  HB2 SER A 342      88.440  68.720  49.440  1.00  0.00           H
ATOM    662  OG  SER A 342      87.300  70.450  49.380  1.00  0.00           O
ATOM    663  HG  SER A 342      87.350  71.400  49.240  1.00  0.00           H
ATOM    664  C   SER A 342      90.880  69.510  48.790  1.00  0.00           C
ATOM    665  O   SER A 342      91.580  69.870  49.780  1.00  0.00           O
ATOM    666  N   SER A 343      91.190  68.510  47.980  1.00  0.00           N
ATOM    667  H   SER A 343      90.480  68.210  47.320  1.00  0.00           H
ATOM    668  CA  SER A 343      92.480  67.710  48.080  1.00  0.00           C
ATOM    669  HA  SER A 343      92.980  67.990  49.000  1.00  0.00           H
ATOM    670  CB  SER A 343      92.210  66.170  48.260  1.00  0.00           C
ATOM    671  HB1 SER A 343      91.650  66.020  49.180  1.00  0.00           H
ATOM    672  HB2 SER A 343      93.190  65.700  48.240  1.00  0.00           H
ATOM    673  OG  SER A 343      91.450  65.670  47.200  1.00  0.00           O
ATOM    674  HG  SER A 343      90.940  64.920  47.520  1.00  0.00           H
ATOM    675  C   SER A 343      93.560  68.030  47.000  1.00  0.00           C
ATOM    676  O   SER A 343      94.710  67.630  47.150  1.00  0.00           O
ATOM    677  N   GLY A 344      93.170  68.800  45.980  1.00  0.00           N
ATOM    678  H   GLY A 344      92.230  69.160  46.020  1.00  0.00           H
ATOM    679  CA  GLY A 344      94.150  69.500  45.060  1.00  0.00           C
ATOM    680  HA1 GLY A 344      94.820  70.080  45.700  1.00  0.00           H
ATOM    681  HA2 GLY A 344      93.470  70.090  44.460  1.00  0.00           H
ATOM    682  C   GLY A 344      94.960  68.590  44.140  1.00  0.00           C
ATOM    683  O   GLY A 344      95.840  69.050  43.390  1.00  0.00           O
ATOM    684  N   LYS A 345      94.580  67.350  44.190  1.00  0.00           N
ATOM    685  H   LYS A 345      93.720  67.080  44.650  1.00  0.00           H
ATOM    686  CA  LYS A 345      95.140  66.250  43.390  1.00  0.00           C
ATOM    687  HA  LYS A 345      96.170  66.590  43.250  1.00  0.00           H
ATOM    688  CB  LYS A 345      95.140  64.970  44.200  1.00  0.00           C
ATOM    689  HB1 LYS A 345      95.440  65.090  45.240  1.00  0.00           H
ATOM    690  HB2 LYS A 345      95.890  64.270  43.820  1.00  0.00           H
ATOM    691  CG  LYS A 345      93.760  64.170  44.280  1.00  0.00           C
ATOM    692  HG1 LYS A 345      93.540  63.840  43.260  1.00  0.00           H
ATOM    693  HG2 LYS A 345      92.970  64.820  44.660  1.00  0.00           H
ATOM    694  CD  LYS A 345      93.860  62.870  45.160  1.00  0.00           C
ATOM    695  HD1 LYS A 345      94.630  63.000  45.920  1.00  0.00           H
ATOM    696  HD2 LYS A 345      94.130  62.100  44.440  1.00  0.00           H
ATOM    697  CE  LYS A 345      92.500  62.520  45.830  1.00  0.00           C
ATOM    698  HE1 LYS A 345      91.780  62.330  45.030  1.00  0.00           H
ATOM    699  HE2 LYS A 345      92.210  63.410  46.380  1.00  0.00           H
ATOM    700  NZ  LYS A 345      92.650  61.400  46.850  1.00  0.00           N
ATOM    701  HZ1 LYS A 345      93.040  60.580  46.410  1.00  0.00           H
ATOM    702  HZ2 LYS A 345      93.150  61.650  47.690  1.00  0.00           H
ATOM    703  HZ3 LYS A 345      91.760  61.050  47.200  1.00  0.00           H
ATOM    704  C   LYS A 345      94.520  66.240  41.960  1.00  0.00           C
ATOM    705  O   LYS A 345      93.350  66.590  41.820  1.00  0.00           O
ATOM    706  N   LEU A 346      95.260  65.810  40.960  1.00  0.00           N
ATOM    707  H   LEU A 346      96.210  65.500  41.080  1.00  0.00           H
ATOM    708  CA  LEU A 346      94.700  65.610  39.640  1.00  0.00           C
ATOM    709  HA  LEU A 346      93.800  66.210  39.500  1.00  0.00           H
ATOM    710  CB  LEU A 346      95.620  66.180  38.510  1.00  0.00           C
ATOM    711  HB1 LEU A 346      95.060  66.180  37.580  1.00  0.00           H
ATOM    712  HB2 LEU A 346      96.500  65.610  38.220  1.00  0.00           H
ATOM    713  CG  LEU A 346      96.120  67.630  38.700  1.00  0.00           C
ATOM    714  HG  LEU A 346      96.880  67.810  39.470  1.00  0.00           H
ATOM    715  CD1 LEU A 346      96.810  68.020  37.410  1.00  0.00           C
ATOM    716 1HD1 LEU A 346      96.090  68.160  36.610  1.00  0.00           H
ATOM    717 2HD1 LEU A 346      97.350  68.960  37.490  1.00  0.00           H
ATOM    718 3HD1 LEU A 346      97.590  67.340  37.080  1.00  0.00           H
ATOM    719  CD2 LEU A 346      94.910  68.590  39.070  1.00  0.00           C
ATOM    720 1HD2 LEU A 346      94.060  68.270  38.470  1.00  0.00           H
ATOM    721 2HD2 LEU A 346      94.680  68.510  40.130  1.00  0.00           H
ATOM    722 3HD2 LEU A 346      95.160  69.630  38.840  1.00  0.00           H
ATOM    723  C   LEU A 346      94.260  64.140  39.500  1.00  0.00           C
ATOM    724  O   LEU A 346      94.880  63.240  39.990  1.00  0.00           O
ATOM    725  N   VAL A 347      93.140  63.890  38.730  1.00  0.00           N
ATOM    726  H   VAL A 347      92.540  64.670  38.510  1.00  0.00           H
ATOM    727  CA  VAL A 347      92.900  62.520  38.200  1.00  0.00           C
ATOM    728  HA  VAL A 347      93.800  61.980  38.470  1.00  0.00           H
ATOM    729  CB  VAL A 347      91.690  61.870  38.940  1.00  0.00           C
ATOM    730  HB  VAL A 347      91.500  61.010  38.290  1.00  0.00           H
ATOM    731  CG1 VAL A 347      92.000  61.280  40.290  1.00  0.00           C
ATOM    732 1HG1 VAL A 347      91.200  60.610  40.590  1.00  0.00           H
ATOM    733 2HG1 VAL A 347      92.910  60.690  40.180  1.00  0.00           H
ATOM    734 3HG1 VAL A 347      92.160  62.050  41.060  1.00  0.00           H
ATOM    735  CG2 VAL A 347      90.430  62.660  38.910  1.00  0.00           C
ATOM    736 1HG2 VAL A 347      89.620  62.030  39.290  1.00  0.00           H
ATOM    737 2HG2 VAL A 347      90.620  63.460  39.620  1.00  0.00           H
ATOM    738 3HG2 VAL A 347      90.260  63.010  37.890  1.00  0.00           H
ATOM    739  C   VAL A 347      92.730  62.540  36.710  1.00  0.00           C
ATOM    740  O   VAL A 347      92.580  63.590  36.100  1.00  0.00           O
ATOM    741  N   ALA A 348      92.870  61.400  36.040  1.00  0.00           N
ATOM    742  H   ALA A 348      93.040  60.640  36.680  1.00  0.00           H
ATOM    743  CA  ALA A 348      92.490  61.240  34.640  1.00  0.00           C
ATOM    744  HA  ALA A 348      92.470  62.250  34.240  1.00  0.00           H
ATOM    745  CB  ALA A 348      93.520  60.410  33.860  1.00  0.00           C
ATOM    746  HB1 ALA A 348      94.490  60.900  33.790  1.00  0.00           H
ATOM    747  HB2 ALA A 348      93.530  59.420  34.320  1.00  0.00           H
ATOM    748  HB3 ALA A 348      93.090  60.390  32.860  1.00  0.00           H
ATOM    749  C   ALA A 348      91.020  60.700  34.660  1.00  0.00           C
ATOM    750  O   ALA A 348      90.590  59.940  35.490  1.00  0.00           O
ATOM    751  N   VAL A 349      90.280  61.060  33.600  1.00  0.00           N
ATOM    752  H   VAL A 349      90.720  61.680  32.930  1.00  0.00           H
ATOM    753  CA  VAL A 349      88.800  60.780  33.450  1.00  0.00           C
ATOM    754  HA  VAL A 349      88.460  59.910  34.010  1.00  0.00           H
ATOM    755  CB  VAL A 349      87.930  61.900  33.920  1.00  0.00           C
ATOM    756  HB  VAL A 349      88.090  62.740  33.260  1.00  0.00           H
ATOM    757  CG1 VAL A 349      86.430  61.480  33.870  1.00  0.00           C
ATOM    758 1HG1 VAL A 349      85.880  62.410  33.850  1.00  0.00           H
ATOM    759 2HG1 VAL A 349      86.240  60.910  32.960  1.00  0.00           H
ATOM    760 3HG1 VAL A 349      86.210  60.940  34.800  1.00  0.00           H
ATOM    761  CG2 VAL A 349      88.220  62.280  35.370  1.00  0.00           C
ATOM    762 1HG2 VAL A 349      89.180  62.780  35.450  1.00  0.00           H
ATOM    763 2HG2 VAL A 349      87.460  62.960  35.740  1.00  0.00           H
ATOM    764 3HG2 VAL A 349      88.180  61.400  36.020  1.00  0.00           H
ATOM    765  C   VAL A 349      88.580  60.490  32.010  1.00  0.00           C
ATOM    766  O   VAL A 349      88.740  61.390  31.170  1.00  0.00           O
ATOM    767  N   LYS A 350      88.190  59.270  31.640  1.00  0.00           N
ATOM    768  H   LYS A 350      88.010  58.560  32.330  1.00  0.00           H
ATOM    769  CA  LYS A 350      87.800  58.890  30.310  1.00  0.00           C
ATOM    770  HA  LYS A 350      88.280  59.600  29.640  1.00  0.00           H
ATOM    771  CB  LYS A 350      88.360  57.530  29.860  1.00  0.00           C
ATOM    772  HB1 LYS A 350      89.440  57.620  29.810  1.00  0.00           H
ATOM    773  HB2 LYS A 350      88.050  57.420  28.820  1.00  0.00           H
ATOM    774  CG  LYS A 350      88.000  56.280  30.650  1.00  0.00           C
ATOM    775  HG1 LYS A 350      86.910  56.230  30.740  1.00  0.00           H
ATOM    776  HG2 LYS A 350      88.540  56.340  31.590  1.00  0.00           H
ATOM    777  CD  LYS A 350      88.380  54.950  29.960  1.00  0.00           C
ATOM    778  HD1 LYS A 350      87.910  54.930  28.980  1.00  0.00           H
ATOM    779  HD2 LYS A 350      87.950  54.150  30.560  1.00  0.00           H
ATOM    780  CE  LYS A 350      89.870  54.810  29.700  1.00  0.00           C
ATOM    781  HE1 LYS A 350      90.420  54.830  30.640  1.00  0.00           H
ATOM    782  HE2 LYS A 350      90.270  55.610  29.070  1.00  0.00           H
ATOM    783  NZ  LYS A 350      90.110  53.530  29.100  1.00  0.00           N
ATOM    784  HZ1 LYS A 350      91.070  53.410  28.800  1.00  0.00           H
ATOM    785  HZ2 LYS A 350      89.890  52.760  29.720  1.00  0.00           H
ATOM    786  HZ3 LYS A 350      89.470  53.370  28.330  1.00  0.00           H
ATOM    787  C   LYS A 350      86.260  58.860  30.210  1.00  0.00           C
ATOM    788  O   LYS A 350      85.510  58.610  31.140  1.00  0.00           O
ATOM    789  N   LYS A 351      85.700  59.270  29.080  1.00  0.00           N
ATOM    790  H   LYS A 351      86.340  59.290  28.300  1.00  0.00           H
ATOM    791  CA  LYS A 351      84.320  59.540  28.710  1.00  0.00           C
ATOM    792  HA  LYS A 351      83.710  58.990  29.430  1.00  0.00           H
ATOM    793  CB  LYS A 351      83.990  61.060  28.720  1.00  0.00           C
ATOM    794  HB1 LYS A 351      82.920  61.120  28.490  1.00  0.00           H
ATOM    795  HB2 LYS A 351      84.550  61.490  27.900  1.00  0.00           H
ATOM    796  CG  LYS A 351      84.230  61.840  30.060  1.00  0.00           C
ATOM    797  HG1 LYS A 351      85.270  61.870  30.350  1.00  0.00           H
ATOM    798  HG2 LYS A 351      83.720  61.350  30.880  1.00  0.00           H
ATOM    799  CD  LYS A 351      83.710  63.240  29.840  1.00  0.00           C
ATOM    800  HD1 LYS A 351      82.670  63.160  29.510  1.00  0.00           H
ATOM    801  HD2 LYS A 351      84.300  63.690  29.040  1.00  0.00           H
ATOM    802  CE  LYS A 351      83.900  64.090  31.060  1.00  0.00           C
ATOM    803  HE1 LYS A 351      84.960  64.170  31.260  1.00  0.00           H
ATOM    804  HE2 LYS A 351      83.450  63.520  31.870  1.00  0.00           H
ATOM    805  NZ  LYS A 351      83.260  65.430  30.840  1.00  0.00           N
ATOM    806  HZ1 LYS A 351      83.760  66.010  30.180  1.00  0.00           H
ATOM    807  HZ2 LYS A 351      82.340  65.360  30.430  1.00  0.00           H
ATOM    808  HZ3 LYS A 351      83.240  65.880  31.750  1.00  0.00           H
ATOM    809  C   LYS A 351      83.980  58.960  27.380  1.00  0.00           C
ATOM    810  O   LYS A 351      84.820  59.070  26.450  1.00  0.00           O
ATOM    811  N   MET A 352      82.840  58.310  27.270  1.00  0.00           N
ATOM    812  H   MET A 352      82.370  58.290  28.170  1.00  0.00           H
ATOM    813  CA  MET A 352      82.440  57.430  26.180  1.00  0.00           C
ATOM    814  HA  MET A 352      82.910  57.730  25.240  1.00  0.00           H
ATOM    815  CB  MET A 352      82.780  55.990  26.590  1.00  0.00           C
ATOM    816  HB1 MET A 352      82.370  55.330  25.830  1.00  0.00           H
ATOM    817  HB2 MET A 352      82.320  55.710  27.540  1.00  0.00           H
ATOM    818  CG  MET A 352      84.270  55.570  26.610  1.00  0.00           C
ATOM    819  HG1 MET A 352      84.810  56.040  25.790  1.00  0.00           H
ATOM    820  HG2 MET A 352      84.360  54.520  26.360  1.00  0.00           H
ATOM    821  SD  MET A 352      85.320  55.890  28.110  1.00  0.00           S
ATOM    822  CE  MET A 352      84.640  54.610  29.180  1.00  0.00           C
ATOM    823  HE1 MET A 352      84.500  53.710  28.580  1.00  0.00           H
ATOM    824  HE2 MET A 352      85.320  54.380  30.010  1.00  0.00           H
ATOM    825  HE3 MET A 352      83.780  55.080  29.650  1.00  0.00           H
ATOM    826  C   MET A 352      80.920  57.550  25.860  1.00  0.00           C
ATOM    827  O   MET A 352      80.040  57.170  26.630  1.00  0.00           O
ATOM    828  N   ASP A 353      80.590  58.120  24.660  1.00  0.00           N
ATOM    829  H   ASP A 353      81.270  58.720  24.220  1.00  0.00           H
ATOM    830  CA  ASP A 353      79.120  58.420  24.320  1.00  0.00           C
ATOM    831  HA  ASP A 353      78.470  58.880  25.060  1.00  0.00           H
ATOM    832  CB  ASP A 353      79.170  59.420  23.120  1.00  0.00           C
ATOM    833  HB1 ASP A 353      79.730  58.880  22.350  1.00  0.00           H
ATOM    834  HB2 ASP A 353      79.720  60.300  23.460  1.00  0.00           H
ATOM    835  CG  ASP A 353      77.820  59.780  22.610  1.00  0.00           C
ATOM    836  OD1 ASP A 353      77.330  60.860  23.030  1.00  0.00           O
ATOM    837  OD2 ASP A 353      77.110  59.050  21.930  1.00  0.00           O
ATOM    838  C   ASP A 353      78.440  57.080  23.920  1.00  0.00           C
ATOM    839  O   ASP A 353      79.010  56.330  23.070  1.00  0.00           O
ATOM    840  N   LEU A 354      77.280  56.700  24.460  1.00  0.00           N
ATOM    841  H   LEU A 354      76.810  57.360  25.070  1.00  0.00           H
ATOM    842  CA  LEU A 354      76.690  55.380  24.250  1.00  0.00           C
ATOM    843  HA  LEU A 354      77.460  54.600  24.250  1.00  0.00           H
ATOM    844  CB  LEU A 354      75.700  55.130  25.460  1.00  0.00           C
ATOM    845  HB1 LEU A 354      75.090  54.260  25.250  1.00  0.00           H
ATOM    846  HB2 LEU A 354      74.960  55.930  25.510  1.00  0.00           H
ATOM    847  CG  LEU A 354      76.310  54.920  26.920  1.00  0.00           C
ATOM    848  HG  LEU A 354      76.960  55.710  27.310  1.00  0.00           H
ATOM    849  CD1 LEU A 354      75.120  54.710  27.860  1.00  0.00           C
ATOM    850 1HD1 LEU A 354      75.420  54.360  28.850  1.00  0.00           H
ATOM    851 2HD1 LEU A 354      74.640  55.680  28.000  1.00  0.00           H
ATOM    852 3HD1 LEU A 354      74.420  53.980  27.460  1.00  0.00           H
ATOM    853  CD2 LEU A 354      77.050  53.630  27.100  1.00  0.00           C
ATOM    854 1HD2 LEU A 354      77.790  53.420  26.320  1.00  0.00           H
ATOM    855 2HD2 LEU A 354      77.630  53.590  28.020  1.00  0.00           H
ATOM    856 3HD2 LEU A 354      76.340  52.800  27.060  1.00  0.00           H
ATOM    857  C   LEU A 354      76.030  55.160  22.870  1.00  0.00           C
ATOM    858  O   LEU A 354      75.310  54.140  22.630  1.00  0.00           O
ATOM    859  N   ARG A 355      76.130  56.130  21.940  1.00  0.00           N
ATOM    860  H   ARG A 355      76.580  56.970  22.270  1.00  0.00           H
ATOM    861  CA  ARG A 355      75.840  55.990  20.490  1.00  0.00           C
ATOM    862  HA  ARG A 355      75.350  55.090  20.130  1.00  0.00           H
ATOM    863  CB  ARG A 355      74.840  57.040  19.980  1.00  0.00           C
ATOM    864  HB1 ARG A 355      74.620  56.730  18.960  1.00  0.00           H
ATOM    865  HB2 ARG A 355      75.200  58.070  19.970  1.00  0.00           H
ATOM    866  CG  ARG A 355      73.470  57.000  20.700  1.00  0.00           C
ATOM    867  HG1 ARG A 355      73.200  55.960  20.860  1.00  0.00           H
ATOM    868  HG2 ARG A 355      72.700  57.560  20.170  1.00  0.00           H
ATOM    869  CD  ARG A 355      73.390  57.700  22.080  1.00  0.00           C
ATOM    870  HD1 ARG A 355      73.490  56.960  22.870  1.00  0.00           H
ATOM    871  HD2 ARG A 355      72.350  58.000  22.210  1.00  0.00           H
ATOM    872  NE  ARG A 355      74.260  58.910  22.190  1.00  0.00           N
ATOM    873  HE  ARG A 355      75.260  58.760  22.200  1.00  0.00           H
ATOM    874  CZ  ARG A 355      73.880  60.180  22.160  1.00  0.00           C
ATOM    875  NH1 ARG A 355      74.730  61.170  22.470  1.00  0.00           N
ATOM    876 1HH1 ARG A 355      75.700  60.960  22.650  1.00  0.00           H
ATOM    877 2HH1 ARG A 355      74.460  62.140  22.610  1.00  0.00           H
ATOM    878  NH2 ARG A 355      72.640  60.550  21.900  1.00  0.00           N
ATOM    879 1HH2 ARG A 355      71.940  59.840  21.760  1.00  0.00           H
ATOM    880 2HH2 ARG A 355      72.390  61.530  21.900  1.00  0.00           H
ATOM    881  C   ARG A 355      77.100  56.060  19.590  1.00  0.00           C
ATOM    882  O   ARG A 355      77.070  55.410  18.550  1.00  0.00           O
ATOM    883  N   LYS A 356      78.240  56.650  20.020  1.00  0.00           N
ATOM    884  H   LYS A 356      78.200  57.230  20.850  1.00  0.00           H
ATOM    885  CA  LYS A 356      79.540  56.510  19.370  1.00  0.00           C
ATOM    886  HA  LYS A 356      79.470  56.970  18.380  1.00  0.00           H
ATOM    887  CB  LYS A 356      80.600  57.320  20.170  1.00  0.00           C
ATOM    888  HB1 LYS A 356      80.680  56.880  21.170  1.00  0.00           H
ATOM    889  HB2 LYS A 356      80.340  58.370  20.140  1.00  0.00           H
ATOM    890  CG  LYS A 356      82.020  57.200  19.420  1.00  0.00           C
ATOM    891  HG1 LYS A 356      81.850  57.540  18.400  1.00  0.00           H
ATOM    892  HG2 LYS A 356      82.360  56.170  19.360  1.00  0.00           H
ATOM    893  CD  LYS A 356      83.140  57.990  20.000  1.00  0.00           C
ATOM    894  HD1 LYS A 356      83.410  57.690  21.010  1.00  0.00           H
ATOM    895  HD2 LYS A 356      82.970  59.060  20.130  1.00  0.00           H
ATOM    896  CE  LYS A 356      84.310  57.800  19.010  1.00  0.00           C
ATOM    897  HE1 LYS A 356      83.960  57.800  17.980  1.00  0.00           H
ATOM    898  HE2 LYS A 356      84.690  56.790  19.140  1.00  0.00           H
ATOM    899  NZ  LYS A 356      85.260  58.880  19.060  1.00  0.00           N
ATOM    900  HZ1 LYS A 356      85.670  59.100  19.960  1.00  0.00           H
ATOM    901  HZ2 LYS A 356      86.090  58.650  18.530  1.00  0.00           H
ATOM    902  HZ3 LYS A 356      84.870  59.700  18.610  1.00  0.00           H
ATOM    903  C   LYS A 356      79.880  55.050  19.070  1.00  0.00           C
ATOM    904  O   LYS A 356      80.290  54.730  17.990  1.00  0.00           O
ATOM    905  N   GLN A 357      79.620  54.090  19.950  1.00  0.00           N
ATOM    906  H   GLN A 357      79.220  54.390  20.830  1.00  0.00           H
ATOM    907  CA  GLN A 357      79.620  52.630  19.720  1.00  0.00           C
ATOM    908  HA  GLN A 357      79.360  52.450  18.670  1.00  0.00           H
ATOM    909  CB  GLN A 357      80.960  52.110  20.250  1.00  0.00           C
ATOM    910  HB1 GLN A 357      80.930  51.020  20.260  1.00  0.00           H
ATOM    911  HB2 GLN A 357      80.970  52.350  21.310  1.00  0.00           H
ATOM    912  CG  GLN A 357      82.220  52.550  19.510  1.00  0.00           C
ATOM    913  HG1 GLN A 357      83.140  52.170  19.980  1.00  0.00           H
ATOM    914  HG2 GLN A 357      82.250  53.640  19.530  1.00  0.00           H
ATOM    915  CD  GLN A 357      82.330  52.270  18.020  1.00  0.00           C
ATOM    916  OE1 GLN A 357      81.730  51.350  17.540  1.00  0.00           O
ATOM    917  NE2 GLN A 357      83.250  52.820  17.220  1.00  0.00           N
ATOM    918 1HE2 GLN A 357      83.860  53.560  17.520  1.00  0.00           H
ATOM    919 2HE2 GLN A 357      83.260  52.530  16.250  1.00  0.00           H
ATOM    920  C   GLN A 357      78.490  51.830  20.420  1.00  0.00           C
ATOM    921  O   GLN A 357      77.940  52.210  21.420  1.00  0.00           O
ATOM    922  N   GLN A 358      78.210  50.670  19.800  1.00  0.00           N
ATOM    923  H   GLN A 358      78.880  50.470  19.080  1.00  0.00           H
ATOM    924  CA  GLN A 358      77.110  49.820  20.050  1.00  0.00           C
ATOM    925  HA  GLN A 358      76.420  50.390  20.670  1.00  0.00           H
ATOM    926  CB  GLN A 358      76.460  49.500  18.700  1.00  0.00           C
ATOM    927  HB1 GLN A 358      75.710  48.740  18.930  1.00  0.00           H
ATOM    928  HB2 GLN A 358      77.170  48.960  18.080  1.00  0.00           H
ATOM    929  CG  GLN A 358      75.710  50.590  17.960  1.00  0.00           C
ATOM    930  HG1 GLN A 358      74.800  50.950  18.450  1.00  0.00           H
ATOM    931  HG2 GLN A 358      75.370  50.190  17.000  1.00  0.00           H
ATOM    932  CD  GLN A 358      76.620  51.770  17.460  1.00  0.00           C
ATOM    933  OE1 GLN A 358      77.760  51.640  16.990  1.00  0.00           O
ATOM    934  NE2 GLN A 358      76.090  52.960  17.610  1.00  0.00           N
ATOM    935 1HE2 GLN A 358      75.180  53.060  18.050  1.00  0.00           H
ATOM    936 2HE2 GLN A 358      76.690  53.750  17.430  1.00  0.00           H
ATOM    937  C   GLN A 358      77.450  48.520  20.820  1.00  0.00           C
ATOM    938  O   GLN A 358      76.630  48.050  21.620  1.00  0.00           O
ATOM    939  N   ARG A 359      78.560  47.900  20.490  1.00  0.00           N
ATOM    940  H   ARG A 359      79.090  48.360  19.770  1.00  0.00           H
ATOM    941  CA  ARG A 359      79.040  46.670  21.080  1.00  0.00           C
ATOM    942  HA  ARG A 359      78.220  45.970  21.210  1.00  0.00           H
ATOM    943  CB  ARG A 359      80.180  46.020  20.290  1.00  0.00           C
ATOM    944  HB1 ARG A 359      80.480  45.120  20.830  1.00  0.00           H
ATOM    945  HB2 ARG A 359      80.940  46.800  20.160  1.00  0.00           H
ATOM    946  CG  ARG A 359      79.640  45.610  18.920  1.00  0.00           C
ATOM    947  HG1 ARG A 359      78.830  46.270  18.600  1.00  0.00           H
ATOM    948  HG2 ARG A 359      79.110  44.670  19.050  1.00  0.00           H
ATOM    949  CD  ARG A 359      80.730  45.630  17.880  1.00  0.00           C
ATOM    950  HD1 ARG A 359      81.140  46.640  17.830  1.00  0.00           H
ATOM    951  HD2 ARG A 359      80.270  45.480  16.900  1.00  0.00           H
ATOM    952  NE  ARG A 359      81.800  44.590  18.120  1.00  0.00           N
ATOM    953  HE  ARG A 359      81.550  43.670  18.430  1.00  0.00           H
ATOM    954  CZ  ARG A 359      83.120  44.750  18.000  1.00  0.00           C
ATOM    955  NH1 ARG A 359      84.010  43.850  18.280  1.00  0.00           N
ATOM    956 1HH1 ARG A 359      83.700  43.030  18.780  1.00  0.00           H
ATOM    957 2HH1 ARG A 359      84.900  43.970  17.810  1.00  0.00           H
ATOM    958  NH2 ARG A 359      83.600  45.790  17.500  1.00  0.00           N
ATOM    959 1HH2 ARG A 359      82.970  46.550  17.270  1.00  0.00           H
ATOM    960 2HH2 ARG A 359      84.590  46.020  17.540  1.00  0.00           H
ATOM    961  C   ARG A 359      79.500  46.970  22.430  1.00  0.00           C
ATOM    962  O   ARG A 359      80.550  47.600  22.650  1.00  0.00           O
ATOM    963  N   ARG A 360      78.750  46.360  23.360  1.00  0.00           N
ATOM    964  H   ARG A 360      77.890  45.950  23.030  1.00  0.00           H
ATOM    965  CA  ARG A 360      79.020  46.440  24.840  1.00  0.00           C
ATOM    966  HA  ARG A 360      78.900  47.490  25.100  1.00  0.00           H
ATOM    967  CB  ARG A 360      78.090  45.560  25.720  1.00  0.00           C
ATOM    968  HB1 ARG A 360      78.290  45.870  26.750  1.00  0.00           H
ATOM    969  HB2 ARG A 360      78.370  44.540  25.490  1.00  0.00           H
ATOM    970  CG  ARG A 360      76.550  45.830  25.490  1.00  0.00           C
ATOM    971  HG1 ARG A 360      76.290  45.670  24.450  1.00  0.00           H
ATOM    972  HG2 ARG A 360      76.370  46.860  25.790  1.00  0.00           H
ATOM    973  CD  ARG A 360      75.790  44.800  26.380  1.00  0.00           C
ATOM    974  HD1 ARG A 360      76.260  44.870  27.360  1.00  0.00           H
ATOM    975  HD2 ARG A 360      75.780  43.790  25.970  1.00  0.00           H
ATOM    976  NE  ARG A 360      74.370  45.160  26.480  1.00  0.00           N
ATOM    977  HE  ARG A 360      74.000  45.590  25.650  1.00  0.00           H
ATOM    978  CZ  ARG A 360      73.520  44.800  27.430  1.00  0.00           C
ATOM    979  NH1 ARG A 360      73.850  44.170  28.500  1.00  0.00           N
ATOM    980 1HH1 ARG A 360      74.820  43.980  28.690  1.00  0.00           H
ATOM    981 2HH1 ARG A 360      73.140  43.960  29.180  1.00  0.00           H
ATOM    982  NH2 ARG A 360      72.200  44.940  27.280  1.00  0.00           N
ATOM    983 1HH2 ARG A 360      71.860  45.310  26.410  1.00  0.00           H
ATOM    984 2HH2 ARG A 360      71.640  44.500  28.000  1.00  0.00           H
ATOM    985  C   ARG A 360      80.460  45.950  25.100  1.00  0.00           C
ATOM    986  O   ARG A 360      81.080  46.540  25.970  1.00  0.00           O
ATOM    987  N   GLU A 361      80.890  44.970  24.300  1.00  0.00           N
ATOM    988  H   GLU A 361      80.290  44.580  23.600  1.00  0.00           H
ATOM    989  CA  GLU A 361      82.250  44.380  24.420  1.00  0.00           C
ATOM    990  HA  GLU A 361      82.290  43.840  25.360  1.00  0.00           H
ATOM    991  CB  GLU A 361      82.450  43.180  23.390  1.00  0.00           C
ATOM    992  HB1 GLU A 361      81.560  42.580  23.250  1.00  0.00           H
ATOM    993  HB2 GLU A 361      83.180  42.550  23.910  1.00  0.00           H
ATOM    994  CG  GLU A 361      83.040  43.600  22.000  1.00  0.00           C
ATOM    995  HG1 GLU A 361      84.010  44.080  22.170  1.00  0.00           H
ATOM    996  HG2 GLU A 361      82.380  44.330  21.530  1.00  0.00           H
ATOM    997  CD  GLU A 361      83.310  42.330  21.170  1.00  0.00           C
ATOM    998  OE1 GLU A 361      82.900  42.210  19.990  1.00  0.00           O
ATOM    999  OE2 GLU A 361      83.860  41.340  21.670  1.00  0.00           O
ATOM   1000  C   GLU A 361      83.400  45.350  24.470  1.00  0.00           C
ATOM   1001  O   GLU A 361      84.390  44.930  24.950  1.00  0.00           O
ATOM   1002  N   LEU A 362      83.180  46.590  23.930  1.00  0.00           N
ATOM   1003  H   LEU A 362      82.270  46.790  23.530  1.00  0.00           H
ATOM   1004  CA  LEU A 362      84.090  47.690  24.030  1.00  0.00           C
ATOM   1005  HA  LEU A 362      85.150  47.450  23.970  1.00  0.00           H
ATOM   1006  CB  LEU A 362      83.870  48.570  22.750  1.00  0.00           C
ATOM   1007  HB1 LEU A 362      84.760  49.150  22.480  1.00  0.00           H
ATOM   1008  HB2 LEU A 362      83.010  49.220  22.910  1.00  0.00           H
ATOM   1009  CG  LEU A 362      83.700  47.810  21.440  1.00  0.00           C
ATOM   1010  HG  LEU A 362      82.940  47.060  21.660  1.00  0.00           H
ATOM   1011  CD1 LEU A 362      83.110  48.750  20.400  1.00  0.00           C
ATOM   1012 1HD1 LEU A 362      82.020  48.810  20.470  1.00  0.00           H
ATOM   1013 2HD1 LEU A 362      83.500  49.740  20.630  1.00  0.00           H
ATOM   1014 3HD1 LEU A 362      83.180  48.320  19.400  1.00  0.00           H
ATOM   1015  CD2 LEU A 362      84.990  47.090  21.030  1.00  0.00           C
ATOM   1016 1HD2 LEU A 362      85.840  47.750  20.850  1.00  0.00           H
ATOM   1017 2HD2 LEU A 362      85.230  46.290  21.740  1.00  0.00           H
ATOM   1018 3HD2 LEU A 362      84.640  46.530  20.160  1.00  0.00           H
ATOM   1019  C   LEU A 362      84.130  48.510  25.250  1.00  0.00           C
ATOM   1020  O   LEU A 362      85.080  49.220  25.510  1.00  0.00           O
ATOM   1021  N   LEU A 363      83.090  48.460  26.130  1.00  0.00           N
ATOM   1022  H   LEU A 363      82.320  47.840  25.880  1.00  0.00           H
ATOM   1023  CA  LEU A 363      82.760  49.570  27.040  1.00  0.00           C
ATOM   1024  HA  LEU A 363      83.630  50.220  26.980  1.00  0.00           H
ATOM   1025  CB  LEU A 363      81.360  50.210  26.680  1.00  0.00           C
ATOM   1026  HB1 LEU A 363      81.200  50.900  27.510  1.00  0.00           H
ATOM   1027  HB2 LEU A 363      80.730  49.330  26.610  1.00  0.00           H
ATOM   1028  CG  LEU A 363      81.520  50.970  25.350  1.00  0.00           C
ATOM   1029  HG  LEU A 363      82.230  50.420  24.740  1.00  0.00           H
ATOM   1030  CD1 LEU A 363      80.230  51.190  24.670  1.00  0.00           C
ATOM   1031 1HD1 LEU A 363      79.780  50.220  24.430  1.00  0.00           H
ATOM   1032 2HD1 LEU A 363      79.590  51.750  25.350  1.00  0.00           H
ATOM   1033 3HD1 LEU A 363      80.460  51.630  23.700  1.00  0.00           H
ATOM   1034  CD2 LEU A 363      82.130  52.390  25.600  1.00  0.00           C
ATOM   1035 1HD2 LEU A 363      83.030  52.460  26.210  1.00  0.00           H
ATOM   1036 2HD2 LEU A 363      82.390  52.790  24.630  1.00  0.00           H
ATOM   1037 3HD2 LEU A 363      81.400  53.020  26.100  1.00  0.00           H
ATOM   1038  C   LEU A 363      82.670  48.950  28.460  1.00  0.00           C
ATOM   1039  O   LEU A 363      82.690  49.670  29.460  1.00  0.00           O
ATOM   1040  N   PHE A 364      82.330  47.630  28.590  1.00  0.00           N
ATOM   1041  H   PHE A 364      82.600  47.030  27.820  1.00  0.00           H
ATOM   1042  CA  PHE A 364      82.030  46.970  29.910  1.00  0.00           C
ATOM   1043  HA  PHE A 364      81.850  47.810  30.580  1.00  0.00           H
ATOM   1044  CB  PHE A 364      80.750  46.050  29.720  1.00  0.00           C
ATOM   1045  HB1 PHE A 364      80.980  45.130  29.190  1.00  0.00           H
ATOM   1046  HB2 PHE A 364      80.010  46.640  29.180  1.00  0.00           H
ATOM   1047  CG  PHE A 364      80.120  45.660  31.020  1.00  0.00           C
ATOM   1048  CD1 PHE A 364      79.430  46.660  31.710  1.00  0.00           C
ATOM   1049  HD1 PHE A 364      79.320  47.620  31.230  1.00  0.00           H
ATOM   1050  CE1 PHE A 364      78.870  46.320  32.850  1.00  0.00           C
ATOM   1051  HE1 PHE A 364      78.080  46.970  33.200  1.00  0.00           H
ATOM   1052  CZ  PHE A 364      78.910  45.050  33.410  1.00  0.00           C
ATOM   1053  HZ  PHE A 364      78.440  44.880  34.370  1.00  0.00           H
ATOM   1054  CE2 PHE A 364      79.710  44.090  32.810  1.00  0.00           C
ATOM   1055  HE2 PHE A 364      79.870  43.090  33.190  1.00  0.00           H
ATOM   1056  CD2 PHE A 364      80.270  44.340  31.540  1.00  0.00           C
ATOM   1057  HD2 PHE A 364      80.890  43.630  31.020  1.00  0.00           H
ATOM   1058  C   PHE A 364      83.210  46.160  30.350  1.00  0.00           C
ATOM   1059  O   PHE A 364      83.070  45.200  31.090  1.00  0.00           O
ATOM   1060  N   ASN A 365      84.460  46.680  30.080  1.00  0.00           N
ATOM   1061  H   ASN A 365      84.570  47.480  29.460  1.00  0.00           H
ATOM   1062  CA  ASN A 365      85.640  45.940  30.450  1.00  0.00           C
ATOM   1063  HA  ASN A 365      85.390  44.880  30.560  1.00  0.00           H
ATOM   1064  CB  ASN A 365      86.650  45.830  29.280  1.00  0.00           C
ATOM   1065  HB1 ASN A 365      87.460  45.120  29.450  1.00  0.00           H
ATOM   1066  HB2 ASN A 365      87.230  46.740  29.160  1.00  0.00           H
ATOM   1067  CG  ASN A 365      85.980  45.340  27.990  1.00  0.00           C
ATOM   1068  OD1 ASN A 365      85.200  44.390  27.900  1.00  0.00           O
ATOM   1069  ND2 ASN A 365      86.170  45.980  26.860  1.00  0.00           N
ATOM   1070 1HD2 ASN A 365      86.650  46.860  26.840  1.00  0.00           H
ATOM   1071 2HD2 ASN A 365      85.640  45.590  26.090  1.00  0.00           H
ATOM   1072  C   ASN A 365      86.220  46.410  31.810  1.00  0.00           C
ATOM   1073  O   ASN A 365      86.240  45.670  32.800  1.00  0.00           O
ATOM   1074  N   GLU A 366      86.710  47.580  31.950  1.00  0.00           N
ATOM   1075  H   GLU A 366      87.020  48.020  31.100  1.00  0.00           H
ATOM   1076  CA  GLU A 366      87.290  48.230  33.160  1.00  0.00           C
ATOM   1077  HA  GLU A 366      88.090  47.630  33.600  1.00  0.00           H
ATOM   1078  CB  GLU A 366      87.860  49.620  32.780  1.00  0.00           C
ATOM   1079  HB1 GLU A 366      87.960  50.160  33.720  1.00  0.00           H
ATOM   1080  HB2 GLU A 366      87.110  50.190  32.230  1.00  0.00           H
ATOM   1081  CG  GLU A 366      89.150  49.530  31.920  1.00  0.00           C
ATOM   1082  HG1 GLU A 366      88.990  48.740  31.200  1.00  0.00           H
ATOM   1083  HG2 GLU A 366      89.900  49.180  32.640  1.00  0.00           H
ATOM   1084  CD  GLU A 366      89.430  50.920  31.250  1.00  0.00           C
ATOM   1085  OE1 GLU A 366      90.260  51.660  31.770  1.00  0.00           O
ATOM   1086  OE2 GLU A 366      88.860  51.310  30.210  1.00  0.00           O
ATOM   1087  C   GLU A 366      86.250  48.450  34.240  1.00  0.00           C
ATOM   1088  O   GLU A 366      86.590  48.300  35.420  1.00  0.00           O
ATOM   1089  N   VAL A 367      84.950  48.710  33.890  1.00  0.00           N
ATOM   1090  H   VAL A 367      84.860  49.060  32.950  1.00  0.00           H
ATOM   1091  CA  VAL A 367      83.900  48.850  34.870  1.00  0.00           C
ATOM   1092  HA  VAL A 367      84.270  49.580  35.590  1.00  0.00           H
ATOM   1093  CB  VAL A 367      82.550  49.300  34.210  1.00  0.00           C
ATOM   1094  HB  VAL A 367      81.750  49.290  34.950  1.00  0.00           H
ATOM   1095  CG1 VAL A 367      82.700  50.820  33.890  1.00  0.00           C
ATOM   1096 1HG1 VAL A 367      81.740  51.270  33.620  1.00  0.00           H
ATOM   1097 2HG1 VAL A 367      83.210  51.330  34.710  1.00  0.00           H
ATOM   1098 3HG1 VAL A 367      83.310  51.010  33.010  1.00  0.00           H
ATOM   1099  CG2 VAL A 367      82.110  48.610  32.890  1.00  0.00           C
ATOM   1100 1HG2 VAL A 367      81.280  49.110  32.390  1.00  0.00           H
ATOM   1101 2HG2 VAL A 367      82.990  48.490  32.260  1.00  0.00           H
ATOM   1102 3HG2 VAL A 367      81.850  47.630  33.280  1.00  0.00           H
ATOM   1103  C   VAL A 367      83.560  47.590  35.700  1.00  0.00           C
ATOM   1104  O   VAL A 367      82.940  47.770  36.740  1.00  0.00           O
ATOM   1105  N   VAL A 368      83.990  46.330  35.290  1.00  0.00           N
ATOM   1106  H   VAL A 368      84.400  46.280  34.370  1.00  0.00           H
ATOM   1107  CA  VAL A 368      83.960  45.140  36.170  1.00  0.00           C
ATOM   1108  HA  VAL A 368      83.670  45.350  37.210  1.00  0.00           H
ATOM   1109  CB  VAL A 368      82.910  44.190  35.770  1.00  0.00           C
ATOM   1110  HB  VAL A 368      82.860  43.360  36.480  1.00  0.00           H
ATOM   1111  CG1 VAL A 368      81.530  44.880  35.810  1.00  0.00           C
ATOM   1112 1HG1 VAL A 368      80.750  44.120  35.780  1.00  0.00           H
ATOM   1113 2HG1 VAL A 368      81.430  45.440  36.750  1.00  0.00           H
ATOM   1114 3HG1 VAL A 368      81.520  45.630  35.020  1.00  0.00           H
ATOM   1115  CG2 VAL A 368      83.200  43.680  34.370  1.00  0.00           C
ATOM   1116 1HG2 VAL A 368      84.190  43.260  34.200  1.00  0.00           H
ATOM   1117 2HG2 VAL A 368      82.510  42.850  34.240  1.00  0.00           H
ATOM   1118 3HG2 VAL A 368      82.880  44.400  33.610  1.00  0.00           H
ATOM   1119  C   VAL A 368      85.370  44.520  36.340  1.00  0.00           C
ATOM   1120  O   VAL A 368      85.630  43.990  37.460  1.00  0.00           O
ATOM   1121  N   ILE A 369      86.280  44.460  35.330  1.00  0.00           N
ATOM   1122  H   ILE A 369      86.080  44.880  34.440  1.00  0.00           H
ATOM   1123  CA  ILE A 369      87.570  43.730  35.440  1.00  0.00           C
ATOM   1124  HA  ILE A 369      87.480  42.890  36.120  1.00  0.00           H
ATOM   1125  CB  ILE A 369      88.060  43.230  34.040  1.00  0.00           C
ATOM   1126  HB  ILE A 369      88.260  44.080  33.390  1.00  0.00           H
ATOM   1127  CG2 ILE A 369      89.350  42.400  34.140  1.00  0.00           C
ATOM   1128 1HG2 ILE A 369      90.240  42.860  34.560  1.00  0.00           H
ATOM   1129 2HG2 ILE A 369      89.140  41.390  34.500  1.00  0.00           H
ATOM   1130 3HG2 ILE A 369      89.640  42.230  33.110  1.00  0.00           H
ATOM   1131  CG1 ILE A 369      86.990  42.400  33.300  1.00  0.00           C
ATOM   1132 1HG1 ILE A 369      86.020  42.910  33.350  1.00  0.00           H
ATOM   1133 2HG1 ILE A 369      86.840  41.470  33.840  1.00  0.00           H
ATOM   1134  CD  ILE A 369      87.270  42.080  31.800  1.00  0.00           C
ATOM   1135  HD1 ILE A 369      87.080  42.940  31.160  1.00  0.00           H
ATOM   1136  HD2 ILE A 369      88.300  41.820  31.600  1.00  0.00           H
ATOM   1137  HD3 ILE A 369      86.660  41.210  31.540  1.00  0.00           H
ATOM   1138  C   ILE A 369      88.610  44.580  36.180  1.00  0.00           C
ATOM   1139  O   ILE A 369      89.330  43.920  36.940  1.00  0.00           O
ATOM   1140  N   MET A 370      88.710  45.910  35.910  1.00  0.00           N
ATOM   1141  H   MET A 370      88.130  46.330  35.200  1.00  0.00           H
ATOM   1142  CA  MET A 370      89.680  46.720  36.460  1.00  0.00           C
ATOM   1143  HA  MET A 370      90.400  46.120  37.030  1.00  0.00           H
ATOM   1144  CB  MET A 370      90.380  47.690  35.580  1.00  0.00           C
ATOM   1145  HB1 MET A 370      91.120  48.300  36.090  1.00  0.00           H
ATOM   1146  HB2 MET A 370      89.740  48.490  35.200  1.00  0.00           H
ATOM   1147  CG  MET A 370      91.020  46.900  34.390  1.00  0.00           C
ATOM   1148  HG1 MET A 370      91.620  47.450  33.670  1.00  0.00           H
ATOM   1149  HG2 MET A 370      90.150  46.520  33.860  1.00  0.00           H
ATOM   1150  SD  MET A 370      91.990  45.440  34.810  1.00  0.00           S
ATOM   1151  CE  MET A 370      93.460  46.160  35.610  1.00  0.00           C
ATOM   1152  HE1 MET A 370      93.650  47.150  35.190  1.00  0.00           H
ATOM   1153  HE2 MET A 370      93.320  46.100  36.690  1.00  0.00           H
ATOM   1154  HE3 MET A 370      94.360  45.600  35.340  1.00  0.00           H
ATOM   1155  C   MET A 370      89.170  47.570  37.650  1.00  0.00           C
ATOM   1156  O   MET A 370      89.930  48.040  38.500  1.00  0.00           O
ATOM   1157  N   ARG A 371      87.880  47.670  37.910  1.00  0.00           N
ATOM   1158  H   ARG A 371      87.250  47.440  37.160  1.00  0.00           H
ATOM   1159  CA  ARG A 371      87.260  48.030  39.140  1.00  0.00           C
ATOM   1160  HA  ARG A 371      87.550  48.990  39.550  1.00  0.00           H
ATOM   1161  CB  ARG A 371      85.700  48.090  38.980  1.00  0.00           C
ATOM   1162  HB1 ARG A 371      85.330  47.070  38.870  1.00  0.00           H
ATOM   1163  HB2 ARG A 371      85.500  48.730  38.110  1.00  0.00           H
ATOM   1164  CG  ARG A 371      85.000  48.670  40.190  1.00  0.00           C
ATOM   1165  HG1 ARG A 371      85.450  48.310  41.120  1.00  0.00           H
ATOM   1166  HG2 ARG A 371      83.920  48.560  40.180  1.00  0.00           H
ATOM   1167  CD  ARG A 371      85.240  50.170  40.280  1.00  0.00           C
ATOM   1168  HD1 ARG A 371      84.850  50.740  39.440  1.00  0.00           H
ATOM   1169  HD2 ARG A 371      86.320  50.280  40.410  1.00  0.00           H
ATOM   1170  NE  ARG A 371      84.760  50.810  41.460  1.00  0.00           N
ATOM   1171  HE  ARG A 371      85.410  50.820  42.230  1.00  0.00           H
ATOM   1172  CZ  ARG A 371      83.670  51.580  41.630  1.00  0.00           C
ATOM   1173  NH1 ARG A 371      82.830  51.810  40.650  1.00  0.00           N
ATOM   1174 1HH1 ARG A 371      82.920  51.270  39.810  1.00  0.00           H
ATOM   1175 2HH1 ARG A 371      82.130  52.530  40.800  1.00  0.00           H
ATOM   1176  NH2 ARG A 371      83.380  52.140  42.810  1.00  0.00           N
ATOM   1177 1HH2 ARG A 371      84.010  52.130  43.600  1.00  0.00           H
ATOM   1178 2HH2 ARG A 371      82.550  52.720  42.780  1.00  0.00           H
ATOM   1179  C   ARG A 371      87.660  46.890  40.080  1.00  0.00           C
ATOM   1180  O   ARG A 371      87.510  45.660  39.730  1.00  0.00           O
ATOM   1181  N   ASP A 372      88.140  47.360  41.260  1.00  0.00           N
ATOM   1182  H   ASP A 372      88.220  48.360  41.350  1.00  0.00           H
ATOM   1183  CA  ASP A 372      88.480  46.460  42.400  1.00  0.00           C
ATOM   1184  HA  ASP A 372      88.820  47.080  43.230  1.00  0.00           H
ATOM   1185  CB  ASP A 372      87.320  45.630  42.930  1.00  0.00           C
ATOM   1186  HB1 ASP A 372      87.570  45.100  43.850  1.00  0.00           H
ATOM   1187  HB2 ASP A 372      87.270  44.830  42.180  1.00  0.00           H
ATOM   1188  CG  ASP A 372      86.070  46.390  43.120  1.00  0.00           C
ATOM   1189  OD1 ASP A 372      86.200  47.510  43.680  1.00  0.00           O
ATOM   1190  OD2 ASP A 372      84.970  45.990  42.710  1.00  0.00           O
ATOM   1191  C   ASP A 372      89.750  45.640  42.260  1.00  0.00           C
ATOM   1192  O   ASP A 372      89.990  44.620  42.900  1.00  0.00           O
ATOM   1193  N   TYR A 373      90.550  45.950  41.270  1.00  0.00           N
ATOM   1194  H   TYR A 373      90.310  46.800  40.790  1.00  0.00           H
ATOM   1195  CA  TYR A 373      91.910  45.420  41.100  1.00  0.00           C
ATOM   1196  HA  TYR A 373      91.950  44.540  41.750  1.00  0.00           H
ATOM   1197  CB  TYR A 373      92.050  44.990  39.670  1.00  0.00           C
ATOM   1198  HB1 TYR A 373      92.140  45.840  38.990  1.00  0.00           H
ATOM   1199  HB2 TYR A 373      91.160  44.520  39.250  1.00  0.00           H
ATOM   1200  CG  TYR A 373      93.200  44.050  39.240  1.00  0.00           C
ATOM   1201  CD1 TYR A 373      94.500  44.590  39.120  1.00  0.00           C
ATOM   1202  HD1 TYR A 373      94.770  45.600  39.430  1.00  0.00           H
ATOM   1203  CE1 TYR A 373      95.440  43.770  38.640  1.00  0.00           C
ATOM   1204  HE1 TYR A 373      96.490  44.040  38.590  1.00  0.00           H
ATOM   1205  CZ  TYR A 373      95.220  42.410  38.350  1.00  0.00           C
ATOM   1206  OH  TYR A 373      96.180  41.530  38.010  1.00  0.00           O
ATOM   1207  HH  TYR A 373      97.090  41.820  38.020  1.00  0.00           H
ATOM   1208  CE2 TYR A 373      93.890  41.880  38.490  1.00  0.00           C
ATOM   1209  HE2 TYR A 373      93.780  40.820  38.290  1.00  0.00           H
ATOM   1210  CD2 TYR A 373      92.860  42.690  39.010  1.00  0.00           C
ATOM   1211  HD2 TYR A 373      91.830  42.380  39.100  1.00  0.00           H
ATOM   1212  C   TYR A 373      92.990  46.300  41.580  1.00  0.00           C
ATOM   1213  O   TYR A 373      92.980  47.480  41.380  1.00  0.00           O
ATOM   1214  N   GLN A 374      94.030  45.720  42.120  1.00  0.00           N
ATOM   1215  H   GLN A 374      94.010  44.730  42.310  1.00  0.00           H
ATOM   1216  CA  GLN A 374      95.260  46.360  42.580  1.00  0.00           C
ATOM   1217  HA  GLN A 374      95.350  47.270  41.990  1.00  0.00           H
ATOM   1218  CB  GLN A 374      95.210  46.660  44.120  1.00  0.00           C
ATOM   1219  HB1 GLN A 374      96.120  47.200  44.380  1.00  0.00           H
ATOM   1220  HB2 GLN A 374      95.240  45.720  44.670  1.00  0.00           H
ATOM   1221  CG  GLN A 374      94.080  47.630  44.560  1.00  0.00           C
ATOM   1222  HG1 GLN A 374      93.120  47.170  44.790  1.00  0.00           H
ATOM   1223  HG2 GLN A 374      93.880  48.440  43.860  1.00  0.00           H
ATOM   1224  CD  GLN A 374      94.510  48.360  45.820  1.00  0.00           C
ATOM   1225  OE1 GLN A 374      95.130  47.810  46.710  1.00  0.00           O
ATOM   1226  NE2 GLN A 374      94.080  49.610  45.970  1.00  0.00           N
ATOM   1227 1HE2 GLN A 374      93.810  50.190  45.190  1.00  0.00           H
ATOM   1228 2HE2 GLN A 374      94.200  49.960  46.910  1.00  0.00           H
ATOM   1229  C   GLN A 374      96.460  45.420  42.250  1.00  0.00           C
ATOM   1230  O   GLN A 374      96.350  44.210  42.570  1.00  0.00           O
ATOM   1231  N   HIS A 375      97.470  46.000  41.620  1.00  0.00           N
ATOM   1232  H   HIS A 375      97.310  46.940  41.300  1.00  0.00           H
ATOM   1233  CA  HIS A 375      98.810  45.400  41.400  1.00  0.00           C
ATOM   1234  HA  HIS A 375      98.970  44.770  42.280  1.00  0.00           H
ATOM   1235  CB  HIS A 375      98.850  44.620  40.100  1.00  0.00           C
ATOM   1236  HB1 HIS A 375      98.480  45.310  39.340  1.00  0.00           H
ATOM   1237  HB2 HIS A 375      98.080  43.850  40.040  1.00  0.00           H
ATOM   1238  CG  HIS A 375     100.180  43.930  39.910  1.00  0.00           C
ATOM   1239  ND1 HIS A 375     101.150  44.200  38.940  1.00  0.00           N
ATOM   1240  CE1 HIS A 375     102.120  43.320  39.160  1.00  0.00           C
ATOM   1241  HE1 HIS A 375     102.970  43.140  38.520  1.00  0.00           H
ATOM   1242  NE2 HIS A 375     101.750  42.490  40.150  1.00  0.00           N
ATOM   1243  HE2 HIS A 375     102.260  41.650  40.390  1.00  0.00           H
ATOM   1244  CD2 HIS A 375     100.580  42.930  40.680  1.00  0.00           C
ATOM   1245  HD2 HIS A 375     100.010  42.400  41.430  1.00  0.00           H
ATOM   1246  C   HIS A 375      99.910  46.470  41.390  1.00  0.00           C
ATOM   1247  O   HIS A 375      99.740  47.580  40.840  1.00  0.00           O
ATOM   1248  N   GLU A 376     101.060  46.270  41.980  1.00  0.00           N
ATOM   1249  H   GLU A 376     101.150  45.410  42.490  1.00  0.00           H
ATOM   1250  CA  GLU A 376     102.110  47.300  42.050  1.00  0.00           C
ATOM   1251  HA  GLU A 376     101.600  48.170  42.470  1.00  0.00           H
ATOM   1252  CB  GLU A 376     103.110  46.900  43.120  1.00  0.00           C
ATOM   1253  HB1 GLU A 376     102.710  46.790  44.120  1.00  0.00           H
ATOM   1254  HB2 GLU A 376     103.740  47.790  43.190  1.00  0.00           H
ATOM   1255  CG  GLU A 376     103.850  45.700  42.620  1.00  0.00           C
ATOM   1256  HG1 GLU A 376     104.590  46.010  41.890  1.00  0.00           H
ATOM   1257  HG2 GLU A 376     103.120  45.130  42.040  1.00  0.00           H
ATOM   1258  CD  GLU A 376     104.550  44.920  43.810  1.00  0.00           C
ATOM   1259  OE1 GLU A 376     103.850  44.460  44.750  1.00  0.00           O
ATOM   1260  OE2 GLU A 376     105.810  44.880  43.860  1.00  0.00           O
ATOM   1261  C   GLU A 376     102.740  47.810  40.660  1.00  0.00           C
ATOM   1262  O   GLU A 376     103.510  48.750  40.730  1.00  0.00           O
ATOM   1263  N   ASN A 377     102.480  47.190  39.500  1.00  0.00           N
ATOM   1264  H   ASN A 377     101.970  46.320  39.540  1.00  0.00           H
ATOM   1265  CA  ASN A 377     102.800  47.580  38.170  1.00  0.00           C
ATOM   1266  HA  ASN A 377     103.380  48.500  38.270  1.00  0.00           H
ATOM   1267  CB  ASN A 377     103.700  46.450  37.620  1.00  0.00           C
ATOM   1268  HB1 ASN A 377     104.150  46.900  36.740  1.00  0.00           H
ATOM   1269  HB2 ASN A 377     103.130  45.620  37.210  1.00  0.00           H
ATOM   1270  CG  ASN A 377     104.910  46.050  38.500  1.00  0.00           C
ATOM   1271  OD1 ASN A 377     104.860  45.050  39.250  1.00  0.00           O
ATOM   1272  ND2 ASN A 377     105.960  46.780  38.550  1.00  0.00           N
ATOM   1273 1HD2 ASN A 377     105.960  47.740  38.250  1.00  0.00           H
ATOM   1274 2HD2 ASN A 377     106.660  46.430  39.190  1.00  0.00           H
ATOM   1275  C   ASN A 377     101.550  47.980  37.250  1.00  0.00           C
ATOM   1276  O   ASN A 377     101.650  47.820  36.040  1.00  0.00           O
ATOM   1277  N   VAL A 378     100.450  48.450  37.820  1.00  0.00           N
ATOM   1278  H   VAL A 378     100.440  48.450  38.830  1.00  0.00           H
ATOM   1279  CA  VAL A 378      99.190  48.770  37.050  1.00  0.00           C
ATOM   1280  HA  VAL A 378      99.470  48.790  35.990  1.00  0.00           H
ATOM   1281  CB  VAL A 378      98.230  47.570  37.460  1.00  0.00           C
ATOM   1282  HB  VAL A 378      98.240  47.320  38.530  1.00  0.00           H
ATOM   1283  CG1 VAL A 378      96.640  47.780  37.150  1.00  0.00           C
ATOM   1284 1HG1 VAL A 378      96.540  47.830  36.070  1.00  0.00           H
ATOM   1285 2HG1 VAL A 378      96.060  46.900  37.450  1.00  0.00           H
ATOM   1286 3HG1 VAL A 378      96.210  48.590  37.740  1.00  0.00           H
ATOM   1287  CG2 VAL A 378      98.610  46.360  36.620  1.00  0.00           C
ATOM   1288 1HG2 VAL A 378      98.800  46.710  35.600  1.00  0.00           H
ATOM   1289 2HG2 VAL A 378      99.500  45.810  36.930  1.00  0.00           H
ATOM   1290 3HG2 VAL A 378      97.870  45.550  36.640  1.00  0.00           H
ATOM   1291  C   VAL A 378      98.640  50.220  37.370  1.00  0.00           C
ATOM   1292  O   VAL A 378      98.710  50.620  38.490  1.00  0.00           O
ATOM   1293  N   VAL A 379      98.160  51.010  36.380  1.00  0.00           N
ATOM   1294  H   VAL A 379      98.080  50.520  35.500  1.00  0.00           H
ATOM   1295  CA  VAL A 379      97.380  52.210  36.600  1.00  0.00           C
ATOM   1296  HA  VAL A 379      97.700  52.880  37.390  1.00  0.00           H
ATOM   1297  CB  VAL A 379      97.330  52.950  35.280  1.00  0.00           C
ATOM   1298  HB  VAL A 379      96.810  52.320  34.560  1.00  0.00           H
ATOM   1299  CG1 VAL A 379      96.570  54.230  35.500  1.00  0.00           C
ATOM   1300 1HG1 VAL A 379      97.040  54.880  36.230  1.00  0.00           H
ATOM   1301 2HG1 VAL A 379      96.430  54.650  34.510  1.00  0.00           H
ATOM   1302 3HG1 VAL A 379      95.520  54.030  35.740  1.00  0.00           H
ATOM   1303  CG2 VAL A 379      98.650  53.380  34.810  1.00  0.00           C
ATOM   1304 1HG2 VAL A 379      99.140  53.740  35.720  1.00  0.00           H
ATOM   1305 2HG2 VAL A 379      99.240  52.520  34.480  1.00  0.00           H
ATOM   1306 3HG2 VAL A 379      98.630  54.170  34.060  1.00  0.00           H
ATOM   1307  C   VAL A 379      96.010  51.690  37.050  1.00  0.00           C
ATOM   1308  O   VAL A 379      95.330  50.940  36.400  1.00  0.00           O
ATOM   1309  N   GLU A 380      95.680  52.220  38.270  1.00  0.00           N
ATOM   1310  H   GLU A 380      96.250  52.890  38.760  1.00  0.00           H
ATOM   1311  CA  GLU A 380      94.420  51.790  38.990  1.00  0.00           C
ATOM   1312  HA  GLU A 380      94.260  50.720  38.960  1.00  0.00           H
ATOM   1313  CB  GLU A 380      94.730  51.990  40.520  1.00  0.00           C
ATOM   1314  HB1 GLU A 380      94.450  53.000  40.800  1.00  0.00           H
ATOM   1315  HB2 GLU A 380      95.800  51.750  40.590  1.00  0.00           H
ATOM   1316  CG  GLU A 380      94.080  50.960  41.510  1.00  0.00           C
ATOM   1317  HG1 GLU A 380      94.610  50.030  41.310  1.00  0.00           H
ATOM   1318  HG2 GLU A 380      93.060  50.730  41.200  1.00  0.00           H
ATOM   1319  CD  GLU A 380      94.310  51.190  43.030  1.00  0.00           C
ATOM   1320  OE1 GLU A 380      93.330  50.970  43.760  1.00  0.00           O
ATOM   1321  OE2 GLU A 380      95.430  51.560  43.440  1.00  0.00           O
ATOM   1322  C   GLU A 380      93.180  52.480  38.490  1.00  0.00           C
ATOM   1323  O   GLU A 380      93.270  53.620  37.910  1.00  0.00           O
ATOM   1324  N   MET A 381      92.020  51.840  38.690  1.00  0.00           N
ATOM   1325  H   MET A 381      92.060  50.940  39.140  1.00  0.00           H
ATOM   1326  CA  MET A 381      90.740  52.390  38.360  1.00  0.00           C
ATOM   1327  HA  MET A 381      90.860  53.380  37.930  1.00  0.00           H
ATOM   1328  CB  MET A 381      90.150  51.540  37.160  1.00  0.00           C
ATOM   1329  HB1 MET A 381      90.140  50.500  37.510  1.00  0.00           H
ATOM   1330  HB2 MET A 381      90.830  51.630  36.320  1.00  0.00           H
ATOM   1331  CG  MET A 381      88.740  52.080  36.750  1.00  0.00           C
ATOM   1332  HG1 MET A 381      88.470  51.810  35.730  1.00  0.00           H
ATOM   1333  HG2 MET A 381      88.810  53.160  36.680  1.00  0.00           H
ATOM   1334  SD  MET A 381      87.500  51.560  37.920  1.00  0.00           S
ATOM   1335  CE  MET A 381      85.990  51.850  36.980  1.00  0.00           C
ATOM   1336  HE1 MET A 381      85.860  52.890  36.670  1.00  0.00           H
ATOM   1337  HE2 MET A 381      86.080  51.320  36.030  1.00  0.00           H
ATOM   1338  HE3 MET A 381      85.120  51.400  37.450  1.00  0.00           H
ATOM   1339  C   MET A 381      89.920  52.530  39.610  1.00  0.00           C
ATOM   1340  O   MET A 381      89.890  51.580  40.410  1.00  0.00           O
ATOM   1341  N   TYR A 382      89.240  53.690  39.840  1.00  0.00           N
ATOM   1342  H   TYR A 382      89.440  54.440  39.190  1.00  0.00           H
ATOM   1343  CA  TYR A 382      88.630  54.070  41.180  1.00  0.00           C
ATOM   1344  HA  TYR A 382      88.990  53.410  41.980  1.00  0.00           H
ATOM   1345  CB  TYR A 382      89.020  55.470  41.560  1.00  0.00           C
ATOM   1346  HB1 TYR A 382      88.750  55.580  42.610  1.00  0.00           H
ATOM   1347  HB2 TYR A 382      88.380  56.180  41.040  1.00  0.00           H
ATOM   1348  CG  TYR A 382      90.480  55.860  41.470  1.00  0.00           C
ATOM   1349  CD1 TYR A 382      91.520  55.060  42.020  1.00  0.00           C
ATOM   1350  HD1 TYR A 382      91.110  54.210  42.540  1.00  0.00           H
ATOM   1351  CE1 TYR A 382      92.870  55.440  42.000  1.00  0.00           C
ATOM   1352  HE1 TYR A 382      93.680  54.840  42.380  1.00  0.00           H
ATOM   1353  CZ  TYR A 382      93.200  56.630  41.360  1.00  0.00           C
ATOM   1354  OH  TYR A 382      94.540  56.890  41.400  1.00  0.00           O
ATOM   1355  HH  TYR A 382      94.980  56.310  42.030  1.00  0.00           H
ATOM   1356  CE2 TYR A 382      92.220  57.510  40.780  1.00  0.00           C
ATOM   1357  HE2 TYR A 382      92.600  58.410  40.330  1.00  0.00           H
ATOM   1358  CD2 TYR A 382      90.850  57.070  40.820  1.00  0.00           C
ATOM   1359  HD2 TYR A 382      90.080  57.590  40.270  1.00  0.00           H
ATOM   1360  C   TYR A 382      87.040  54.060  41.160  1.00  0.00           C
ATOM   1361  O   TYR A 382      86.350  53.460  41.970  1.00  0.00           O
ATOM   1362  N   ASN A 383      86.510  54.810  40.160  1.00  0.00           N
ATOM   1363  H   ASN A 383      87.070  55.300  39.480  1.00  0.00           H
ATOM   1364  CA  ASN A 383      85.090  55.100  40.130  1.00  0.00           C
ATOM   1365  HA  ASN A 383      84.470  54.440  40.740  1.00  0.00           H
ATOM   1366  CB  ASN A 383      84.780  56.530  40.740  1.00  0.00           C
ATOM   1367  HB1 ASN A 383      83.700  56.690  40.770  1.00  0.00           H
ATOM   1368  HB2 ASN A 383      85.170  57.290  40.060  1.00  0.00           H
ATOM   1369  CG  ASN A 383      85.310  56.660  42.190  1.00  0.00           C
ATOM   1370  OD1 ASN A 383      86.340  57.190  42.520  1.00  0.00           O
ATOM   1371  ND2 ASN A 383      84.570  56.030  43.050  1.00  0.00           N
ATOM   1372 1HD2 ASN A 383      83.730  55.600  42.680  1.00  0.00           H
ATOM   1373 2HD2 ASN A 383      84.760  56.250  44.010  1.00  0.00           H
ATOM   1374  C   ASN A 383      84.600  55.050  38.650  1.00  0.00           C
ATOM   1375  O   ASN A 383      85.380  55.040  37.690  1.00  0.00           O
ATOM   1376  N   SER A 384      83.300  55.050  38.460  1.00  0.00           N
ATOM   1377  H   SER A 384      82.640  54.990  39.230  1.00  0.00           H
ATOM   1378  CA  SER A 384      82.690  55.100  37.100  1.00  0.00           C
ATOM   1379  HA  SER A 384      83.290  55.710  36.410  1.00  0.00           H
ATOM   1380  CB  SER A 384      82.660  53.710  36.550  1.00  0.00           C
ATOM   1381  HB1 SER A 384      82.230  53.010  37.250  1.00  0.00           H
ATOM   1382  HB2 SER A 384      83.710  53.500  36.340  1.00  0.00           H
ATOM   1383  OG  SER A 384      81.900  53.670  35.350  1.00  0.00           O
ATOM   1384  HG  SER A 384      82.370  54.060  34.610  1.00  0.00           H
ATOM   1385  C   SER A 384      81.250  55.600  37.220  1.00  0.00           C
ATOM   1386  O   SER A 384      80.600  55.330  38.300  1.00  0.00           O
ATOM   1387  N   TYR A 385      80.750  56.320  36.180  1.00  0.00           N
ATOM   1388  H   TYR A 385      81.260  56.390  35.310  1.00  0.00           H
ATOM   1389  CA  TYR A 385      79.530  57.040  36.320  1.00  0.00           C
ATOM   1390  HA  TYR A 385      79.030  56.530  37.140  1.00  0.00           H
ATOM   1391  CB  TYR A 385      79.830  58.530  36.770  1.00  0.00           C
ATOM   1392  HB1 TYR A 385      78.880  59.060  36.820  1.00  0.00           H
ATOM   1393  HB2 TYR A 385      80.370  59.100  36.010  1.00  0.00           H
ATOM   1394  CG  TYR A 385      80.550  58.690  38.100  1.00  0.00           C
ATOM   1395  CD1 TYR A 385      82.000  58.770  38.200  1.00  0.00           C
ATOM   1396  HD1 TYR A 385      82.610  58.630  37.310  1.00  0.00           H
ATOM   1397  CE1 TYR A 385      82.640  58.720  39.490  1.00  0.00           C
ATOM   1398  HE1 TYR A 385      83.690  58.970  39.560  1.00  0.00           H
ATOM   1399  CZ  TYR A 385      81.900  58.720  40.650  1.00  0.00           C
ATOM   1400  OH  TYR A 385      82.630  58.790  41.820  1.00  0.00           O
ATOM   1401  HH  TYR A 385      82.070  58.790  42.600  1.00  0.00           H
ATOM   1402  CE2 TYR A 385      80.510  58.680  40.610  1.00  0.00           C
ATOM   1403  HE2 TYR A 385      80.040  58.760  41.580  1.00  0.00           H
ATOM   1404  CD2 TYR A 385      79.840  58.590  39.380  1.00  0.00           C
ATOM   1405  HD2 TYR A 385      78.760  58.500  39.340  1.00  0.00           H
ATOM   1406  C   TYR A 385      78.720  56.950  35.040  1.00  0.00           C
ATOM   1407  O   TYR A 385      79.220  56.980  33.970  1.00  0.00           O
ATOM   1408  N   LEU A 386      77.370  56.910  35.190  1.00  0.00           N
ATOM   1409  H   LEU A 386      76.950  56.940  36.110  1.00  0.00           H
ATOM   1410  CA  LEU A 386      76.420  57.190  34.090  1.00  0.00           C
ATOM   1411  HA  LEU A 386      76.930  56.990  33.140  1.00  0.00           H
ATOM   1412  CB  LEU A 386      75.110  56.440  34.030  1.00  0.00           C
ATOM   1413  HB1 LEU A 386      74.300  56.950  33.510  1.00  0.00           H
ATOM   1414  HB2 LEU A 386      74.830  56.350  35.080  1.00  0.00           H
ATOM   1415  CG  LEU A 386      75.130  55.040  33.440  1.00  0.00           C
ATOM   1416  HG  LEU A 386      75.840  54.390  33.960  1.00  0.00           H
ATOM   1417  CD1 LEU A 386      73.730  54.460  33.520  1.00  0.00           C
ATOM   1418 1HD1 LEU A 386      73.790  53.410  33.260  1.00  0.00           H
ATOM   1419 2HD1 LEU A 386      73.300  54.620  34.510  1.00  0.00           H
ATOM   1420 3HD1 LEU A 386      73.160  55.020  32.780  1.00  0.00           H
ATOM   1421  CD2 LEU A 386      75.410  55.020  31.970  1.00  0.00           C
ATOM   1422 1HD2 LEU A 386      74.770  55.760  31.500  1.00  0.00           H
ATOM   1423 2HD2 LEU A 386      76.500  55.100  31.870  1.00  0.00           H
ATOM   1424 3HD2 LEU A 386      75.020  54.090  31.560  1.00  0.00           H
ATOM   1425  C   LEU A 386      76.060  58.720  33.960  1.00  0.00           C
ATOM   1426  O   LEU A 386      75.480  59.280  34.870  1.00  0.00           O
ATOM   1427  N   VAL A 387      76.460  59.450  32.920  1.00  0.00           N
ATOM   1428  H   VAL A 387      76.980  59.020  32.160  1.00  0.00           H
ATOM   1429  CA  VAL A 387      76.340  60.950  32.860  1.00  0.00           C
ATOM   1430  HA  VAL A 387      75.830  61.280  33.760  1.00  0.00           H
ATOM   1431  CB  VAL A 387      77.730  61.580  32.960  1.00  0.00           C
ATOM   1432  HB  VAL A 387      78.320  61.490  32.060  1.00  0.00           H
ATOM   1433  CG1 VAL A 387      77.480  63.080  33.220  1.00  0.00           C
ATOM   1434 1HG1 VAL A 387      76.670  63.370  32.550  1.00  0.00           H
ATOM   1435 2HG1 VAL A 387      77.230  63.290  34.250  1.00  0.00           H
ATOM   1436 3HG1 VAL A 387      78.360  63.670  32.990  1.00  0.00           H
ATOM   1437  CG2 VAL A 387      78.550  60.900  34.080  1.00  0.00           C
ATOM   1438 1HG2 VAL A 387      78.990  60.040  33.580  1.00  0.00           H
ATOM   1439 2HG2 VAL A 387      79.400  61.490  34.420  1.00  0.00           H
ATOM   1440 3HG2 VAL A 387      78.060  60.610  35.010  1.00  0.00           H
ATOM   1441  C   VAL A 387      75.410  61.340  31.670  1.00  0.00           C
ATOM   1442  O   VAL A 387      75.860  61.920  30.650  1.00  0.00           O
ATOM   1443  N   GLY A 388      74.090  61.010  31.770  1.00  0.00           N
ATOM   1444  H   GLY A 388      73.820  60.580  32.640  1.00  0.00           H
ATOM   1445  CA  GLY A 388      73.080  61.000  30.700  1.00  0.00           C
ATOM   1446  HA1 GLY A 388      73.150  61.910  30.100  1.00  0.00           H
ATOM   1447  HA2 GLY A 388      72.140  60.750  31.190  1.00  0.00           H
ATOM   1448  C   GLY A 388      73.150  59.770  29.800  1.00  0.00           C
ATOM   1449  O   GLY A 388      72.630  58.700  30.150  1.00  0.00           O
ATOM   1450  N   ASP A 389      73.640  59.930  28.540  1.00  0.00           N
ATOM   1451  H   ASP A 389      73.960  60.820  28.180  1.00  0.00           H
ATOM   1452  CA  ASP A 389      73.960  58.800  27.590  1.00  0.00           C
ATOM   1453  HA  ASP A 389      73.590  57.850  27.970  1.00  0.00           H
ATOM   1454  CB  ASP A 389      73.190  58.980  26.260  1.00  0.00           C
ATOM   1455  HB1 ASP A 389      73.330  58.080  25.670  1.00  0.00           H
ATOM   1456  HB2 ASP A 389      73.550  59.850  25.710  1.00  0.00           H
ATOM   1457  CG  ASP A 389      71.640  59.120  26.440  1.00  0.00           C
ATOM   1458  OD1 ASP A 389      71.050  59.990  25.750  1.00  0.00           O
ATOM   1459  OD2 ASP A 389      71.070  58.190  27.030  1.00  0.00           O
ATOM   1460  C   ASP A 389      75.510  58.710  27.360  1.00  0.00           C
ATOM   1461  O   ASP A 389      76.010  58.320  26.340  1.00  0.00           O
ATOM   1462  N   GLU A 390      76.270  59.000  28.410  1.00  0.00           N
ATOM   1463  H   GLU A 390      75.850  59.220  29.300  1.00  0.00           H
ATOM   1464  CA  GLU A 390      77.730  59.030  28.380  1.00  0.00           C
ATOM   1465  HA  GLU A 390      78.090  58.630  27.430  1.00  0.00           H
ATOM   1466  CB  GLU A 390      78.180  60.480  28.520  1.00  0.00           C
ATOM   1467  HB1 GLU A 390      77.970  60.770  29.550  1.00  0.00           H
ATOM   1468  HB2 GLU A 390      77.670  61.190  27.880  1.00  0.00           H
ATOM   1469  CG  GLU A 390      79.690  60.650  28.210  1.00  0.00           C
ATOM   1470  HG1 GLU A 390      79.820  60.330  27.180  1.00  0.00           H
ATOM   1471  HG2 GLU A 390      80.360  59.970  28.730  1.00  0.00           H
ATOM   1472  CD  GLU A 390      80.100  62.140  28.270  1.00  0.00           C
ATOM   1473  OE1 GLU A 390      79.960  62.820  29.310  1.00  0.00           O
ATOM   1474  OE2 GLU A 390      80.480  62.710  27.210  1.00  0.00           O
ATOM   1475  C   GLU A 390      78.250  58.220  29.540  1.00  0.00           C
ATOM   1476  O   GLU A 390      77.890  58.430  30.710  1.00  0.00           O
ATOM   1477  N   LEU A 391      79.190  57.330  29.300  1.00  0.00           N
ATOM   1478  H   LEU A 391      79.590  57.240  28.380  1.00  0.00           H
ATOM   1479  CA  LEU A 391      79.840  56.540  30.320  1.00  0.00           C
ATOM   1480  HA  LEU A 391      79.170  56.590  31.180  1.00  0.00           H
ATOM   1481  CB  LEU A 391      79.980  55.160  29.740  1.00  0.00           C
ATOM   1482  HB1 LEU A 391      80.370  55.210  28.730  1.00  0.00           H
ATOM   1483  HB2 LEU A 391      78.980  54.750  29.660  1.00  0.00           H
ATOM   1484  CG  LEU A 391      80.740  54.040  30.600  1.00  0.00           C
ATOM   1485  HG  LEU A 391      81.690  54.400  31.000  1.00  0.00           H
ATOM   1486  CD1 LEU A 391      79.900  53.810  31.800  1.00  0.00           C
ATOM   1487 1HD1 LEU A 391      78.920  53.410  31.550  1.00  0.00           H
ATOM   1488 2HD1 LEU A 391      80.400  53.160  32.520  1.00  0.00           H
ATOM   1489 3HD1 LEU A 391      79.690  54.690  32.410  1.00  0.00           H
ATOM   1490  CD2 LEU A 391      80.970  52.770  29.860  1.00  0.00           C
ATOM   1491 1HD2 LEU A 391      81.400  52.020  30.520  1.00  0.00           H
ATOM   1492 2HD2 LEU A 391      80.010  52.410  29.480  1.00  0.00           H
ATOM   1493 3HD2 LEU A 391      81.700  52.960  29.080  1.00  0.00           H
ATOM   1494  C   LEU A 391      81.250  57.060  30.700  1.00  0.00           C
ATOM   1495  O   LEU A 391      82.120  57.220  29.850  1.00  0.00           O
ATOM   1496  N   TRP A 392      81.370  57.460  32.000  1.00  0.00           N
ATOM   1497  H   TRP A 392      80.660  57.260  32.690  1.00  0.00           H
ATOM   1498  CA  TRP A 392      82.700  57.910  32.590  1.00  0.00           C
ATOM   1499  HA  TRP A 392      83.300  58.190  31.720  1.00  0.00           H
ATOM   1500  CB  TRP A 392      82.550  59.140  33.550  1.00  0.00           C
ATOM   1501  HB1 TRP A 392      83.540  59.450  33.900  1.00  0.00           H
ATOM   1502  HB2 TRP A 392      82.000  58.910  34.460  1.00  0.00           H
ATOM   1503  CG  TRP A 392      81.920  60.460  33.070  1.00  0.00           C
ATOM   1504  CD1 TRP A 392      81.270  60.650  31.910  1.00  0.00           C
ATOM   1505  HD1 TRP A 392      80.960  59.880  31.210  1.00  0.00           H
ATOM   1506  NE1 TRP A 392      81.040  61.950  31.760  1.00  0.00           N
ATOM   1507  HE1 TRP A 392      80.440  62.310  31.020  1.00  0.00           H
ATOM   1508  CE2 TRP A 392      81.400  62.680  32.850  1.00  0.00           C
ATOM   1509  CZ2 TRP A 392      81.270  64.080  33.240  1.00  0.00           C
ATOM   1510  HZ2 TRP A 392      80.850  64.840  32.600  1.00  0.00           H
ATOM   1511  CH2 TRP A 392      81.950  64.540  34.400  1.00  0.00           C
ATOM   1512  HH2 TRP A 392      81.960  65.600  34.600  1.00  0.00           H
ATOM   1513  CZ3 TRP A 392      82.650  63.620  35.190  1.00  0.00           C
ATOM   1514  HZ3 TRP A 392      83.230  63.980  36.020  1.00  0.00           H
ATOM   1515  CE3 TRP A 392      82.620  62.230  34.890  1.00  0.00           C
ATOM   1516  HE3 TRP A 392      83.050  61.470  35.520  1.00  0.00           H
ATOM   1517  CD2 TRP A 392      82.000  61.790  33.720  1.00  0.00           C
ATOM   1518  C   TRP A 392      83.460  56.790  33.290  1.00  0.00           C
ATOM   1519  O   TRP A 392      82.890  56.040  34.060  1.00  0.00           O
ATOM   1520  N   VAL A 393      84.800  56.760  33.280  1.00  0.00           N
ATOM   1521  H   VAL A 393      85.250  57.450  32.690  1.00  0.00           H
ATOM   1522  CA  VAL A 393      85.660  55.980  34.250  1.00  0.00           C
ATOM   1523  HA  VAL A 393      85.040  55.680  35.090  1.00  0.00           H
ATOM   1524  CB  VAL A 393      86.150  54.670  33.530  1.00  0.00           C
ATOM   1525  HB  VAL A 393      86.530  54.950  32.550  1.00  0.00           H
ATOM   1526  CG1 VAL A 393      87.250  54.030  34.340  1.00  0.00           C
ATOM   1527 1HG1 VAL A 393      88.150  54.590  34.090  1.00  0.00           H
ATOM   1528 2HG1 VAL A 393      87.020  54.180  35.390  1.00  0.00           H
ATOM   1529 3HG1 VAL A 393      87.430  53.010  33.990  1.00  0.00           H
ATOM   1530  CG2 VAL A 393      84.960  53.600  33.480  1.00  0.00           C
ATOM   1531 1HG2 VAL A 393      84.320  53.690  34.360  1.00  0.00           H
ATOM   1532 2HG2 VAL A 393      84.300  53.810  32.650  1.00  0.00           H
ATOM   1533 3HG2 VAL A 393      85.310  52.580  33.330  1.00  0.00           H
ATOM   1534  C   VAL A 393      86.770  56.870  34.800  1.00  0.00           C
ATOM   1535  O   VAL A 393      87.360  57.640  34.020  1.00  0.00           O
ATOM   1536  N   VAL A 394      87.270  56.660  36.080  1.00  0.00           N
ATOM   1537  H   VAL A 394      86.670  56.100  36.680  1.00  0.00           H
ATOM   1538  CA  VAL A 394      88.160  57.560  36.710  1.00  0.00           C
ATOM   1539  HA  VAL A 394      88.470  58.270  35.940  1.00  0.00           H
ATOM   1540  CB  VAL A 394      87.450  58.260  37.870  1.00  0.00           C
ATOM   1541  HB  VAL A 394      87.350  57.490  38.640  1.00  0.00           H
ATOM   1542  CG1 VAL A 394      88.380  59.360  38.430  1.00  0.00           C
ATOM   1543 1HG1 VAL A 394      88.380  60.120  37.650  1.00  0.00           H
ATOM   1544 2HG1 VAL A 394      88.000  59.820  39.340  1.00  0.00           H
ATOM   1545 3HG1 VAL A 394      89.390  59.020  38.640  1.00  0.00           H
ATOM   1546  CG2 VAL A 394      86.100  58.880  37.520  1.00  0.00           C
ATOM   1547 1HG2 VAL A 394      85.810  59.680  38.190  1.00  0.00           H
ATOM   1548 2HG2 VAL A 394      86.190  59.390  36.560  1.00  0.00           H
ATOM   1549 3HG2 VAL A 394      85.300  58.140  37.520  1.00  0.00           H
ATOM   1550  C   VAL A 394      89.450  56.810  37.230  1.00  0.00           C
ATOM   1551  O   VAL A 394      89.250  55.790  37.900  1.00  0.00           O
ATOM   1552  N   MET A 395      90.610  57.330  36.900  1.00  0.00           N
ATOM   1553  H   MET A 395      90.660  58.250  36.480  1.00  0.00           H
ATOM   1554  CA  MET A 395      91.980  56.740  37.060  1.00  0.00           C
ATOM   1555  HA  MET A 395      91.780  55.990  37.830  1.00  0.00           H
ATOM   1556  CB  MET A 395      92.290  55.970  35.760  1.00  0.00           C
ATOM   1557  HB1 MET A 395      91.580  55.150  35.690  1.00  0.00           H
ATOM   1558  HB2 MET A 395      93.300  55.640  36.030  1.00  0.00           H
ATOM   1559  CG  MET A 395      92.270  56.830  34.370  1.00  0.00           C
ATOM   1560  HG1 MET A 395      93.180  57.430  34.280  1.00  0.00           H
ATOM   1561  HG2 MET A 395      91.590  57.680  34.350  1.00  0.00           H
ATOM   1562  SD  MET A 395      91.940  55.770  33.000  1.00  0.00           S
ATOM   1563  CE  MET A 395      91.940  57.040  31.670  1.00  0.00           C
ATOM   1564  HE1 MET A 395      92.900  57.550  31.710  1.00  0.00           H
ATOM   1565  HE2 MET A 395      91.750  56.570  30.710  1.00  0.00           H
ATOM   1566  HE3 MET A 395      91.130  57.770  31.730  1.00  0.00           H
ATOM   1567  C   MET A 395      92.990  57.800  37.460  1.00  0.00           C
ATOM   1568  O   MET A 395      92.710  58.970  37.490  1.00  0.00           O
ATOM   1569  N   GLU A 396      94.160  57.340  37.910  1.00  0.00           N
ATOM   1570  H   GLU A 396      94.210  56.340  38.020  1.00  0.00           H
ATOM   1571  CA  GLU A 396      95.360  58.120  38.290  1.00  0.00           C
ATOM   1572  HA  GLU A 396      95.120  58.660  39.210  1.00  0.00           H
ATOM   1573  CB  GLU A 396      96.520  57.130  38.700  1.00  0.00           C
ATOM   1574  HB1 GLU A 396      96.860  56.710  37.750  1.00  0.00           H
ATOM   1575  HB2 GLU A 396      96.120  56.280  39.240  1.00  0.00           H
ATOM   1576  CG  GLU A 396      97.560  57.690  39.700  1.00  0.00           C
ATOM   1577  HG1 GLU A 396      97.080  58.000  40.630  1.00  0.00           H
ATOM   1578  HG2 GLU A 396      98.100  58.550  39.290  1.00  0.00           H
ATOM   1579  CD  GLU A 396      98.610  56.670  40.030  1.00  0.00           C
ATOM   1580  OE1 GLU A 396      99.600  56.630  39.290  1.00  0.00           O
ATOM   1581  OE2 GLU A 396      98.350  55.780  40.910  1.00  0.00           O
ATOM   1582  C   GLU A 396      95.800  59.130  37.240  1.00  0.00           C
ATOM   1583  O   GLU A 396      95.880  58.730  36.040  1.00  0.00           O
ATOM   1584  N   PHE A 397      96.180  60.300  37.700  1.00  0.00           N
ATOM   1585  H   PHE A 397      95.950  60.450  38.680  1.00  0.00           H
ATOM   1586  CA  PHE A 397      97.040  61.160  36.880  1.00  0.00           C
ATOM   1587  HA  PHE A 397      96.860  61.000  35.820  1.00  0.00           H
ATOM   1588  CB  PHE A 397      96.790  62.650  37.170  1.00  0.00           C
ATOM   1589  HB1 PHE A 397      97.290  62.960  38.080  1.00  0.00           H
ATOM   1590  HB2 PHE A 397      95.760  62.990  37.100  1.00  0.00           H
ATOM   1591  CG  PHE A 397      97.410  63.520  36.080  1.00  0.00           C
ATOM   1592  CD1 PHE A 397      96.960  63.450  34.730  1.00  0.00           C
ATOM   1593  HD1 PHE A 397      96.120  62.840  34.430  1.00  0.00           H
ATOM   1594  CE1 PHE A 397      97.670  64.140  33.740  1.00  0.00           C
ATOM   1595  HE1 PHE A 397      97.360  64.100  32.710  1.00  0.00           H
ATOM   1596  CZ  PHE A 397      98.850  64.900  34.020  1.00  0.00           C
ATOM   1597  HZ  PHE A 397      99.530  65.260  33.270  1.00  0.00           H
ATOM   1598  CE2 PHE A 397      99.260  64.960  35.400  1.00  0.00           C
ATOM   1599  HE2 PHE A 397     100.150  65.500  35.710  1.00  0.00           H
ATOM   1600  CD2 PHE A 397      98.500  64.290  36.400  1.00  0.00           C
ATOM   1601  HD2 PHE A 397      98.890  64.360  37.400  1.00  0.00           H
ATOM   1602  C   PHE A 397      98.550  60.800  36.990  1.00  0.00           C
ATOM   1603  O   PHE A 397      99.170  60.810  38.040  1.00  0.00           O
ATOM   1604  N   LEU A 398      99.140  60.450  35.870  1.00  0.00           N
ATOM   1605  H   LEU A 398      98.640  60.520  35.000  1.00  0.00           H
ATOM   1606  CA  LEU A 398     100.510  59.960  35.610  1.00  0.00           C
ATOM   1607  HA  LEU A 398     101.030  59.550  36.480  1.00  0.00           H
ATOM   1608  CB  LEU A 398     100.480  58.800  34.610  1.00  0.00           C
ATOM   1609  HB1 LEU A 398     101.490  58.550  34.300  1.00  0.00           H
ATOM   1610  HB2 LEU A 398      99.780  59.130  33.840  1.00  0.00           H
ATOM   1611  CG  LEU A 398     100.030  57.410  35.150  1.00  0.00           C
ATOM   1612  HG  LEU A 398      99.750  56.850  34.250  1.00  0.00           H
ATOM   1613  CD1 LEU A 398     101.200  56.610  35.690  1.00  0.00           C
ATOM   1614 1HD1 LEU A 398     101.280  56.670  36.780  1.00  0.00           H
ATOM   1615 2HD1 LEU A 398     101.110  55.560  35.420  1.00  0.00           H
ATOM   1616 3HD1 LEU A 398     102.160  56.880  35.260  1.00  0.00           H
ATOM   1617  CD2 LEU A 398      98.930  57.290  36.090  1.00  0.00           C
ATOM   1618 1HD2 LEU A 398      97.990  57.580  35.620  1.00  0.00           H
ATOM   1619 2HD2 LEU A 398      98.830  56.240  36.390  1.00  0.00           H
ATOM   1620 3HD2 LEU A 398      99.170  57.850  36.990  1.00  0.00           H
ATOM   1621  C   LEU A 398     101.410  61.120  35.040  1.00  0.00           C
ATOM   1622  O   LEU A 398     101.190  61.560  33.960  1.00  0.00           O
ATOM   1623  N   GLU A 399     102.330  61.740  35.800  1.00  0.00           N
ATOM   1624  H   GLU A 399     102.440  61.280  36.690  1.00  0.00           H
ATOM   1625  CA  GLU A 399     103.030  62.940  35.380  1.00  0.00           C
ATOM   1626  HA  GLU A 399     102.350  63.540  34.780  1.00  0.00           H
ATOM   1627  CB  GLU A 399     103.570  63.690  36.580  1.00  0.00           C
ATOM   1628  HB1 GLU A 399     104.220  64.470  36.210  1.00  0.00           H
ATOM   1629  HB2 GLU A 399     104.090  63.010  37.260  1.00  0.00           H
ATOM   1630  CG  GLU A 399     102.420  64.340  37.360  1.00  0.00           C
ATOM   1631  HG1 GLU A 399     101.420  63.970  37.110  1.00  0.00           H
ATOM   1632  HG2 GLU A 399     102.260  65.400  37.150  1.00  0.00           H
ATOM   1633  CD  GLU A 399     102.660  64.170  38.900  1.00  0.00           C
ATOM   1634  OE1 GLU A 399     102.400  63.090  39.420  1.00  0.00           O
ATOM   1635  OE2 GLU A 399     103.150  65.090  39.590  1.00  0.00           O
ATOM   1636  C   GLU A 399     104.210  62.700  34.430  1.00  0.00           C
ATOM   1637  O   GLU A 399     104.610  63.640  33.790  1.00  0.00           O
ATOM   1638  N   GLY A 400     104.770  61.430  34.380  1.00  0.00           N
ATOM   1639  H   GLY A 400     104.270  60.660  34.790  1.00  0.00           H
ATOM   1640  CA  GLY A 400     105.950  61.110  33.620  1.00  0.00           C
ATOM   1641  HA1 GLY A 400     106.260  60.140  34.010  1.00  0.00           H
ATOM   1642  HA2 GLY A 400     106.800  61.780  33.780  1.00  0.00           H
ATOM   1643  C   GLY A 400     105.690  61.000  32.110  1.00  0.00           C
ATOM   1644  O   GLY A 400     106.640  60.860  31.340  1.00  0.00           O
ATOM   1645  N   GLY A 401     104.400  61.090  31.710  1.00  0.00           N
ATOM   1646  H   GLY A 401     103.690  61.170  32.430  1.00  0.00           H
ATOM   1647  CA  GLY A 401     103.920  60.890  30.350  1.00  0.00           C
ATOM   1648  HA1 GLY A 401     104.600  61.260  29.600  1.00  0.00           H
ATOM   1649  HA2 GLY A 401     103.030  61.510  30.290  1.00  0.00           H
ATOM   1650  C   GLY A 401     103.590  59.410  29.990  1.00  0.00           C
ATOM   1651  O   GLY A 401     103.440  58.540  30.890  1.00  0.00           O
ATOM   1652  N   ALA A 402     103.430  59.260  28.700  1.00  0.00           N
ATOM   1653  H   ALA A 402     103.720  60.010  28.100  1.00  0.00           H
ATOM   1654  CA  ALA A 402     103.360  57.950  28.050  1.00  0.00           C
ATOM   1655  HA  ALA A 402     103.030  57.170  28.740  1.00  0.00           H
ATOM   1656  CB  ALA A 402     102.330  57.980  26.960  1.00  0.00           C
ATOM   1657  HB1 ALA A 402     102.590  58.690  26.180  1.00  0.00           H
ATOM   1658  HB2 ALA A 402     102.220  56.960  26.590  1.00  0.00           H
ATOM   1659  HB3 ALA A 402     101.390  58.220  27.440  1.00  0.00           H
ATOM   1660  C   ALA A 402     104.760  57.520  27.540  1.00  0.00           C
ATOM   1661  O   ALA A 402     105.670  58.310  27.330  1.00  0.00           O
ATOM   1662  N   LEU A 403     104.930  56.190  27.250  1.00  0.00           N
ATOM   1663  H   LEU A 403     104.220  55.580  27.620  1.00  0.00           H
ATOM   1664  CA  LEU A 403     106.130  55.570  26.790  1.00  0.00           C
ATOM   1665  HA  LEU A 403     106.850  55.950  27.520  1.00  0.00           H
ATOM   1666  CB  LEU A 403     106.040  54.050  27.000  1.00  0.00           C
ATOM   1667  HB1 LEU A 403     105.130  53.780  26.470  1.00  0.00           H
ATOM   1668  HB2 LEU A 403     105.770  53.830  28.030  1.00  0.00           H
ATOM   1669  CG  LEU A 403     107.190  53.260  26.370  1.00  0.00           C
ATOM   1670  HG  LEU A 403     107.320  53.530  25.320  1.00  0.00           H
ATOM   1671  CD1 LEU A 403     108.530  53.420  27.050  1.00  0.00           C
ATOM   1672 1HD1 LEU A 403     108.350  53.020  28.050  1.00  0.00           H
ATOM   1673 2HD1 LEU A 403     109.290  52.860  26.490  1.00  0.00           H
ATOM   1674 3HD1 LEU A 403     108.850  54.460  26.990  1.00  0.00           H
ATOM   1675  CD2 LEU A 403     106.830  51.740  26.430  1.00  0.00           C
ATOM   1676 1HD2 LEU A 403     105.940  51.470  25.860  1.00  0.00           H
ATOM   1677 2HD2 LEU A 403     107.610  51.100  26.010  1.00  0.00           H
ATOM   1678 3HD2 LEU A 403     106.770  51.370  27.450  1.00  0.00           H
ATOM   1679  C   LEU A 403     106.490  56.010  25.380  1.00  0.00           C
ATOM   1680  O   LEU A 403     107.680  56.010  25.010  1.00  0.00           O
ATOM   1681  N   THR A 404     105.550  56.530  24.610  1.00  0.00           N
ATOM   1682  H   THR A 404     104.610  56.470  24.970  1.00  0.00           H
ATOM   1683  CA  THR A 404     105.870  57.150  23.280  1.00  0.00           C
ATOM   1684  HA  THR A 404     106.340  56.400  22.640  1.00  0.00           H
ATOM   1685  CB  THR A 404     104.600  57.660  22.480  1.00  0.00           C
ATOM   1686  HB  THR A 404     104.920  58.290  21.660  1.00  0.00           H
ATOM   1687  CG2 THR A 404     103.820  56.450  21.930  1.00  0.00           C
ATOM   1688 1HG2 THR A 404     104.440  55.890  21.220  1.00  0.00           H
ATOM   1689 2HG2 THR A 404     103.500  55.850  22.770  1.00  0.00           H
ATOM   1690 3HG2 THR A 404     102.890  56.720  21.430  1.00  0.00           H
ATOM   1691  OG1 THR A 404     103.710  58.490  23.270  1.00  0.00           O
ATOM   1692  HG1 THR A 404     104.190  59.050  23.890  1.00  0.00           H
ATOM   1693  C   THR A 404     106.790  58.310  23.430  1.00  0.00           C
ATOM   1694  O   THR A 404     107.680  58.610  22.630  1.00  0.00           O
ATOM   1695  N   ASP A 405     106.700  58.990  24.560  1.00  0.00           N
ATOM   1696  H   ASP A 405     105.980  58.740  25.230  1.00  0.00           H
ATOM   1697  CA  ASP A 405     107.390  60.280  24.790  1.00  0.00           C
ATOM   1698  HA  ASP A 405     107.290  60.910  23.900  1.00  0.00           H
ATOM   1699  CB  ASP A 405     106.720  60.990  25.920  1.00  0.00           C
ATOM   1700  HB1 ASP A 405     107.170  61.990  25.960  1.00  0.00           H
ATOM   1701  HB2 ASP A 405     106.960  60.580  26.900  1.00  0.00           H
ATOM   1702  CG  ASP A 405     105.200  61.030  25.880  1.00  0.00           C
ATOM   1703  OD1 ASP A 405     104.530  61.080  26.920  1.00  0.00           O
ATOM   1704  OD2 ASP A 405     104.680  60.980  24.750  1.00  0.00           O
ATOM   1705  C   ASP A 405     108.880  60.050  25.120  1.00  0.00           C
ATOM   1706  O   ASP A 405     109.630  60.940  24.950  1.00  0.00           O
ATOM   1707  N   ILE A 406     109.330  58.840  25.450  1.00  0.00           N
ATOM   1708  H   ILE A 406     108.620  58.130  25.560  1.00  0.00           H
ATOM   1709  CA  ILE A 406     110.740  58.560  25.580  1.00  0.00           C
ATOM   1710  HA  ILE A 406     111.330  59.440  25.350  1.00  0.00           H
ATOM   1711  CB  ILE A 406     111.130  58.250  27.060  1.00  0.00           C
ATOM   1712  HB  ILE A 406     112.210  58.110  27.100  1.00  0.00           H
ATOM   1713  CG2 ILE A 406     110.880  59.520  27.910  1.00  0.00           C
ATOM   1714 1HG2 ILE A 406     111.500  59.430  28.800  1.00  0.00           H
ATOM   1715 2HG2 ILE A 406     111.200  60.430  27.410  1.00  0.00           H
ATOM   1716 3HG2 ILE A 406     109.840  59.550  28.240  1.00  0.00           H
ATOM   1717  CG1 ILE A 406     110.340  57.040  27.490  1.00  0.00           C
ATOM   1718 1HG1 ILE A 406     110.480  56.180  26.840  1.00  0.00           H
ATOM   1719 2HG1 ILE A 406     109.270  57.260  27.490  1.00  0.00           H
ATOM   1720  CD  ILE A 406     110.610  56.520  28.920  1.00  0.00           C
ATOM   1721  HD1 ILE A 406     110.000  55.650  29.150  1.00  0.00           H
ATOM   1722  HD2 ILE A 406     111.660  56.380  29.180  1.00  0.00           H
ATOM   1723  HD3 ILE A 406     110.290  57.330  29.580  1.00  0.00           H
ATOM   1724  C   ILE A 406     111.260  57.450  24.600  1.00  0.00           C
ATOM   1725  O   ILE A 406     112.430  57.180  24.680  1.00  0.00           O
ATOM   1726  N   VAL A 407     110.430  57.010  23.560  1.00  0.00           N
ATOM   1727  H   VAL A 407     109.460  57.280  23.510  1.00  0.00           H
ATOM   1728  CA  VAL A 407     110.910  56.070  22.520  1.00  0.00           C
ATOM   1729  HA  VAL A 407     112.000  56.040  22.540  1.00  0.00           H
ATOM   1730  CB  VAL A 407     110.490  54.610  22.660  1.00  0.00           C
ATOM   1731  HB  VAL A 407     111.080  54.000  21.980  1.00  0.00           H
ATOM   1732  CG1 VAL A 407     110.750  54.180  24.070  1.00  0.00           C
ATOM   1733 1HG1 VAL A 407     111.700  54.580  24.400  1.00  0.00           H
ATOM   1734 2HG1 VAL A 407     110.080  54.590  24.830  1.00  0.00           H
ATOM   1735 3HG1 VAL A 407     110.910  53.100  24.100  1.00  0.00           H
ATOM   1736  CG2 VAL A 407     109.040  54.280  22.270  1.00  0.00           C
ATOM   1737 1HG2 VAL A 407     108.830  53.260  22.580  1.00  0.00           H
ATOM   1738 2HG2 VAL A 407     108.430  55.020  22.790  1.00  0.00           H
ATOM   1739 3HG2 VAL A 407     108.890  54.510  21.220  1.00  0.00           H
ATOM   1740  C   VAL A 407     110.640  56.490  21.080  1.00  0.00           C
ATOM   1741  O   VAL A 407     111.240  55.960  20.200  1.00  0.00           O
ATOM   1742  N   THR A 408     109.750  57.450  20.820  1.00  0.00           N
ATOM   1743  H   THR A 408     109.180  57.830  21.560  1.00  0.00           H
ATOM   1744  CA  THR A 408     109.300  57.730  19.390  1.00  0.00           C
ATOM   1745  HA  THR A 408     109.470  56.830  18.800  1.00  0.00           H
ATOM   1746  CB  THR A 408     107.800  57.980  19.090  1.00  0.00           C
ATOM   1747  HB  THR A 408     107.710  58.110  18.010  1.00  0.00           H
ATOM   1748  CG2 THR A 408     106.900  56.820  19.540  1.00  0.00           C
ATOM   1749 1HG2 THR A 408     107.340  55.850  19.280  1.00  0.00           H
ATOM   1750 2HG2 THR A 408     106.730  56.630  20.600  1.00  0.00           H
ATOM   1751 3HG2 THR A 408     105.900  56.930  19.120  1.00  0.00           H
ATOM   1752  OG1 THR A 408     107.480  59.230  19.740  1.00  0.00           O
ATOM   1753  HG1 THR A 408     107.650  59.210  20.690  1.00  0.00           H
ATOM   1754  C   THR A 408     110.210  58.830  18.670  1.00  0.00           C
ATOM   1755  O   THR A 408     110.500  58.740  17.470  1.00  0.00           O
ATOM   1756  N   HIS A 409     110.570  59.890  19.400  1.00  0.00           N
ATOM   1757  H   HIS A 409     110.400  59.850  20.400  1.00  0.00           H
ATOM   1758  CA  HIS A 409     111.490  60.940  19.000  1.00  0.00           C
ATOM   1759  HA  HIS A 409     111.760  60.760  17.960  1.00  0.00           H
ATOM   1760  CB  HIS A 409     110.960  62.330  19.110  1.00  0.00           C
ATOM   1761  HB1 HIS A 409     111.850  62.920  18.870  1.00  0.00           H
ATOM   1762  HB2 HIS A 409     110.660  62.560  20.130  1.00  0.00           H
ATOM   1763  CG  HIS A 409     109.870  62.620  18.120  1.00  0.00           C
ATOM   1764  ND1 HIS A 409     108.630  61.940  17.880  1.00  0.00           N
ATOM   1765  HD1 HIS A 409     108.310  61.110  18.350  1.00  0.00           H
ATOM   1766  CE1 HIS A 409     108.110  62.480  16.780  1.00  0.00           C
ATOM   1767  HE1 HIS A 409     107.280  62.030  16.260  1.00  0.00           H
ATOM   1768  NE2 HIS A 409     108.840  63.490  16.310  1.00  0.00           N
ATOM   1769  CD2 HIS A 409     109.950  63.600  17.150  1.00  0.00           C
ATOM   1770  HD2 HIS A 409     110.700  64.360  17.060  1.00  0.00           H
ATOM   1771  C   HIS A 409     112.840  60.800  19.740  1.00  0.00           C
ATOM   1772  O   HIS A 409     113.910  60.950  19.140  1.00  0.00           O
ATOM   1773  N   THR A 410     112.810  60.360  21.010  1.00  0.00           N
ATOM   1774  H   THR A 410     111.960  60.320  21.550  1.00  0.00           H
ATOM   1775  CA  THR A 410     113.980  59.940  21.750  1.00  0.00           C
ATOM   1776  HA  THR A 410     114.860  60.530  21.490  1.00  0.00           H
ATOM   1777  CB  THR A 410     113.810  60.230  23.280  1.00  0.00           C
ATOM   1778  HB  THR A 410     112.930  59.700  23.650  1.00  0.00           H
ATOM   1779  CG2 THR A 410     114.960  59.800  24.180  1.00  0.00           C
ATOM   1780 1HG2 THR A 410     115.810  60.430  23.930  1.00  0.00           H
ATOM   1781 2HG2 THR A 410     114.650  59.770  25.230  1.00  0.00           H
ATOM   1782 3HG2 THR A 410     115.270  58.770  24.030  1.00  0.00           H
ATOM   1783  OG1 THR A 410     113.640  61.660  23.390  1.00  0.00           O
ATOM   1784  HG1 THR A 410     113.040  61.850  24.120  1.00  0.00           H
ATOM   1785  C   THR A 410     114.350  58.410  21.450  1.00  0.00           C
ATOM   1786  O   THR A 410     113.500  57.620  21.030  1.00  0.00           O
ATOM   1787  N   ARG A 411     115.600  57.960  21.700  1.00  0.00           N
ATOM   1788  H   ARG A 411     116.230  58.700  21.990  1.00  0.00           H
ATOM   1789  CA  ARG A 411     116.110  56.530  21.720  1.00  0.00           C
ATOM   1790  HA  ARG A 411     115.290  55.890  21.400  1.00  0.00           H
ATOM   1791  CB  ARG A 411     116.940  56.490  20.410  1.00  0.00           C
ATOM   1792  HB1 ARG A 411     116.360  56.750  19.520  1.00  0.00           H
ATOM   1793  HB2 ARG A 411     117.170  55.440  20.220  1.00  0.00           H
ATOM   1794  CG  ARG A 411     118.220  57.320  20.360  1.00  0.00           C
ATOM   1795  HG1 ARG A 411     118.840  56.940  21.170  1.00  0.00           H
ATOM   1796  HG2 ARG A 411     117.880  58.350  20.370  1.00  0.00           H
ATOM   1797  CD  ARG A 411     119.080  57.090  19.120  1.00  0.00           C
ATOM   1798  HD1 ARG A 411     118.550  57.370  18.210  1.00  0.00           H
ATOM   1799  HD2 ARG A 411     119.220  56.020  18.980  1.00  0.00           H
ATOM   1800  NE  ARG A 411     120.440  57.780  19.260  1.00  0.00           N
ATOM   1801  HE  ARG A 411     120.410  58.760  18.980  1.00  0.00           H
ATOM   1802  CZ  ARG A 411     121.620  57.260  19.600  1.00  0.00           C
ATOM   1803  NH1 ARG A 411     121.860  56.000  19.670  1.00  0.00           N
ATOM   1804 1HH1 ARG A 411     121.190  55.320  19.350  1.00  0.00           H
ATOM   1805 2HH1 ARG A 411     122.820  55.710  19.750  1.00  0.00           H
ATOM   1806  NH2 ARG A 411     122.610  58.100  19.870  1.00  0.00           N
ATOM   1807 1HH2 ARG A 411     122.510  59.110  19.820  1.00  0.00           H
ATOM   1808 2HH2 ARG A 411     123.500  57.680  20.100  1.00  0.00           H
ATOM   1809  C   ARG A 411     116.810  56.130  22.950  1.00  0.00           C
ATOM   1810  O   ARG A 411     117.520  56.880  23.550  1.00  0.00           O
ATOM   1811  N   MET A 412     116.550  54.860  23.350  1.00  0.00           N
ATOM   1812  H   MET A 412     115.870  54.380  22.780  1.00  0.00           H
ATOM   1813  CA  MET A 412     116.960  54.160  24.570  1.00  0.00           C
ATOM   1814  HA  MET A 412     117.210  54.870  25.360  1.00  0.00           H
ATOM   1815  CB  MET A 412     115.860  53.170  25.150  1.00  0.00           C
ATOM   1816  HB1 MET A 412     116.350  52.440  25.800  1.00  0.00           H
ATOM   1817  HB2 MET A 412     115.520  52.610  24.280  1.00  0.00           H
ATOM   1818  CG  MET A 412     114.760  53.850  25.910  1.00  0.00           C
ATOM   1819  HG1 MET A 412     114.240  54.670  25.400  1.00  0.00           H
ATOM   1820  HG2 MET A 412     115.140  54.250  26.850  1.00  0.00           H
ATOM   1821  SD  MET A 412     113.540  52.660  26.440  1.00  0.00           S
ATOM   1822  CE  MET A 412     112.670  53.570  27.630  1.00  0.00           C
ATOM   1823  HE1 MET A 412     113.110  53.380  28.610  1.00  0.00           H
ATOM   1824  HE2 MET A 412     112.590  54.610  27.310  1.00  0.00           H
ATOM   1825  HE3 MET A 412     111.650  53.180  27.700  1.00  0.00           H
ATOM   1826  C   MET A 412     118.300  53.360  24.440  1.00  0.00           C
ATOM   1827  O   MET A 412     118.680  53.090  23.340  1.00  0.00           O
ATOM   1828  N   ASN A 413     118.960  53.100  25.570  1.00  0.00           N
ATOM   1829  H   ASN A 413     118.480  53.450  26.380  1.00  0.00           H
ATOM   1830  CA  ASN A 413     119.920  51.980  25.760  1.00  0.00           C
ATOM   1831  HA  ASN A 413     120.290  51.720  24.770  1.00  0.00           H
ATOM   1832  CB  ASN A 413     121.120  52.320  26.730  1.00  0.00           C
ATOM   1833  HB1 ASN A 413     121.770  51.440  26.710  1.00  0.00           H
ATOM   1834  HB2 ASN A 413     120.780  52.310  27.760  1.00  0.00           H
ATOM   1835  CG  ASN A 413     121.960  53.520  26.350  1.00  0.00           C
ATOM   1836  OD1 ASN A 413     121.910  54.590  26.880  1.00  0.00           O
ATOM   1837  ND2 ASN A 413     122.890  53.260  25.420  1.00  0.00           N
ATOM   1838 1HD2 ASN A 413     123.110  52.280  25.270  1.00  0.00           H
ATOM   1839 2HD2 ASN A 413     123.450  54.030  25.100  1.00  0.00           H
ATOM   1840  C   ASN A 413     119.160  50.740  26.170  1.00  0.00           C
ATOM   1841  O   ASN A 413     118.090  50.810  26.810  1.00  0.00           O
ATOM   1842  N   GLU A 414     119.590  49.540  25.710  1.00  0.00           N
ATOM   1843  H   GLU A 414     120.510  49.400  25.320  1.00  0.00           H
ATOM   1844  CA  GLU A 414     118.720  48.350  25.780  1.00  0.00           C
ATOM   1845  HA  GLU A 414     117.780  48.580  25.270  1.00  0.00           H
ATOM   1846  CB  GLU A 414     119.380  47.150  25.050  1.00  0.00           C
ATOM   1847  HB1 GLU A 414     118.880  46.200  25.260  1.00  0.00           H
ATOM   1848  HB2 GLU A 414     120.330  46.940  25.540  1.00  0.00           H
ATOM   1849  CG  GLU A 414     119.730  47.230  23.560  1.00  0.00           C
ATOM   1850  HG1 GLU A 414     119.040  47.850  23.000  1.00  0.00           H
ATOM   1851  HG2 GLU A 414     119.610  46.250  23.090  1.00  0.00           H
ATOM   1852  CD  GLU A 414     121.130  47.790  23.250  1.00  0.00           C
ATOM   1853  OE1 GLU A 414     122.030  47.050  22.770  1.00  0.00           O
ATOM   1854  OE2 GLU A 414     121.340  48.990  23.390  1.00  0.00           O
ATOM   1855  C   GLU A 414     118.310  47.870  27.170  1.00  0.00           C
ATOM   1856  O   GLU A 414     117.280  47.200  27.250  1.00  0.00           O
ATOM   1857  N   GLU A 415     118.980  48.240  28.270  1.00  0.00           N
ATOM   1858  H   GLU A 415     119.710  48.910  28.100  1.00  0.00           H
ATOM   1859  CA  GLU A 415     118.670  47.950  29.660  1.00  0.00           C
ATOM   1860  HA  GLU A 415     118.290  46.930  29.700  1.00  0.00           H
ATOM   1861  CB  GLU A 415     119.920  48.030  30.470  1.00  0.00           C
ATOM   1862  HB1 GLU A 415     120.740  47.460  30.030  1.00  0.00           H
ATOM   1863  HB2 GLU A 415     119.770  47.590  31.460  1.00  0.00           H
ATOM   1864  CG  GLU A 415     120.430  49.450  30.730  1.00  0.00           C
ATOM   1865  HG1 GLU A 415     119.580  49.950  31.190  1.00  0.00           H
ATOM   1866  HG2 GLU A 415     120.610  49.890  29.750  1.00  0.00           H
ATOM   1867  CD  GLU A 415     121.590  49.520  31.620  1.00  0.00           C
ATOM   1868  OE1 GLU A 415     122.260  48.510  31.850  1.00  0.00           O
ATOM   1869  OE2 GLU A 415     121.830  50.600  32.200  1.00  0.00           O
ATOM   1870  C   GLU A 415     117.500  48.820  30.250  1.00  0.00           C
ATOM   1871  O   GLU A 415     116.970  48.570  31.330  1.00  0.00           O
ATOM   1872  N   GLN A 416     117.160  49.880  29.550  1.00  0.00           N
ATOM   1873  H   GLN A 416     117.800  50.200  28.840  1.00  0.00           H
ATOM   1874  CA  GLN A 416     115.990  50.660  29.830  1.00  0.00           C
ATOM   1875  HA  GLN A 416     115.790  50.770  30.890  1.00  0.00           H
ATOM   1876  CB  GLN A 416     116.240  52.100  29.240  1.00  0.00           C
ATOM   1877  HB1 GLN A 416     115.320  52.680  29.370  1.00  0.00           H
ATOM   1878  HB2 GLN A 416     116.430  52.090  28.170  1.00  0.00           H
ATOM   1879  CG  GLN A 416     117.320  52.820  30.040  1.00  0.00           C
ATOM   1880  HG1 GLN A 416     118.270  52.290  30.130  1.00  0.00           H
ATOM   1881  HG2 GLN A 416     116.880  53.110  31.000  1.00  0.00           H
ATOM   1882  CD  GLN A 416     117.670  54.130  29.320  1.00  0.00           C
ATOM   1883  OE1 GLN A 416     117.990  54.090  28.100  1.00  0.00           O
ATOM   1884  NE2 GLN A 416     117.770  55.360  29.850  1.00  0.00           N
ATOM   1885 1HE2 GLN A 416     117.650  55.560  30.830  1.00  0.00           H
ATOM   1886 2HE2 GLN A 416     118.090  56.030  29.170  1.00  0.00           H
ATOM   1887  C   GLN A 416     114.740  50.000  29.220  1.00  0.00           C
ATOM   1888  O   GLN A 416     113.680  49.960  29.850  1.00  0.00           O
ATOM   1889  N   ILE A 417     114.940  49.340  28.090  1.00  0.00           N
ATOM   1890  H   ILE A 417     115.880  49.380  27.740  1.00  0.00           H
ATOM   1891  CA  ILE A 417     113.960  48.480  27.390  1.00  0.00           C
ATOM   1892  HA  ILE A 417     113.070  49.100  27.390  1.00  0.00           H
ATOM   1893  CB  ILE A 417     114.340  48.110  25.920  1.00  0.00           C
ATOM   1894  HB  ILE A 417     115.220  47.480  26.010  1.00  0.00           H
ATOM   1895  CG2 ILE A 417     113.230  47.410  25.230  1.00  0.00           C
ATOM   1896 1HG2 ILE A 417     112.370  48.070  25.140  1.00  0.00           H
ATOM   1897 2HG2 ILE A 417     113.530  47.140  24.220  1.00  0.00           H
ATOM   1898 3HG2 ILE A 417     112.920  46.520  25.780  1.00  0.00           H
ATOM   1899  CG1 ILE A 417     114.690  49.410  25.130  1.00  0.00           C
ATOM   1900 1HG1 ILE A 417     115.460  49.940  25.670  1.00  0.00           H
ATOM   1901 2HG1 ILE A 417     113.820  50.070  25.050  1.00  0.00           H
ATOM   1902  CD  ILE A 417     115.250  49.230  23.770  1.00  0.00           C
ATOM   1903  HD1 ILE A 417     114.410  49.420  23.100  1.00  0.00           H
ATOM   1904  HD2 ILE A 417     115.950  50.020  23.490  1.00  0.00           H
ATOM   1905  HD3 ILE A 417     115.610  48.210  23.640  1.00  0.00           H
ATOM   1906  C   ILE A 417     113.750  47.250  28.180  1.00  0.00           C
ATOM   1907  O   ILE A 417     112.600  46.940  28.410  1.00  0.00           O
ATOM   1908  N   ALA A 418     114.850  46.640  28.710  1.00  0.00           N
ATOM   1909  H   ALA A 418     115.770  46.870  28.360  1.00  0.00           H
ATOM   1910  CA  ALA A 418     114.690  45.670  29.780  1.00  0.00           C
ATOM   1911  HA  ALA A 418     113.940  45.040  29.300  1.00  0.00           H
ATOM   1912  CB  ALA A 418     116.020  44.990  30.080  1.00  0.00           C
ATOM   1913  HB1 ALA A 418     116.520  45.650  30.790  1.00  0.00           H
ATOM   1914  HB2 ALA A 418     115.740  44.110  30.660  1.00  0.00           H
ATOM   1915  HB3 ALA A 418     116.490  44.780  29.110  1.00  0.00           H
ATOM   1916  C   ALA A 418     113.920  46.100  31.050  1.00  0.00           C
ATOM   1917  O   ALA A 418     113.230  45.230  31.680  1.00  0.00           O
ATOM   1918  N   ALA A 419     114.130  47.350  31.510  1.00  0.00           N
ATOM   1919  H   ALA A 419     114.790  47.970  31.070  1.00  0.00           H
ATOM   1920  CA  ALA A 419     113.270  47.870  32.610  1.00  0.00           C
ATOM   1921  HA  ALA A 419     113.470  47.280  33.500  1.00  0.00           H
ATOM   1922  CB  ALA A 419     113.790  49.290  32.950  1.00  0.00           C
ATOM   1923  HB1 ALA A 419     113.510  49.540  33.970  1.00  0.00           H
ATOM   1924  HB2 ALA A 419     114.880  49.240  32.950  1.00  0.00           H
ATOM   1925  HB3 ALA A 419     113.490  50.010  32.190  1.00  0.00           H
ATOM   1926  C   ALA A 419     111.720  47.880  32.400  1.00  0.00           C
ATOM   1927  O   ALA A 419     110.940  47.470  33.210  1.00  0.00           O
ATOM   1928  N   VAL A 420     111.320  48.340  31.170  1.00  0.00           N
ATOM   1929  H   VAL A 420     112.020  48.800  30.590  1.00  0.00           H
ATOM   1930  CA  VAL A 420     109.970  48.430  30.680  1.00  0.00           C
ATOM   1931  HA  VAL A 420     109.450  48.900  31.510  1.00  0.00           H
ATOM   1932  CB  VAL A 420     109.830  49.290  29.380  1.00  0.00           C
ATOM   1933  HB  VAL A 420     110.360  48.700  28.630  1.00  0.00           H
ATOM   1934  CG1 VAL A 420     108.340  49.420  28.980  1.00  0.00           C
ATOM   1935 1HG1 VAL A 420     107.800  50.120  29.620  1.00  0.00           H
ATOM   1936 2HG1 VAL A 420     108.130  49.780  27.970  1.00  0.00           H
ATOM   1937 3HG1 VAL A 420     107.910  48.420  29.060  1.00  0.00           H
ATOM   1938  CG2 VAL A 420     110.390  50.680  29.430  1.00  0.00           C
ATOM   1939 1HG2 VAL A 420     109.670  51.470  29.660  1.00  0.00           H
ATOM   1940 2HG2 VAL A 420     111.080  50.810  30.270  1.00  0.00           H
ATOM   1941 3HG2 VAL A 420     110.880  51.010  28.520  1.00  0.00           H
ATOM   1942  C   VAL A 420     109.360  47.060  30.450  1.00  0.00           C
ATOM   1943  O   VAL A 420     108.320  46.780  30.980  1.00  0.00           O
ATOM   1944  N   CYS A 421     110.100  46.110  29.800  1.00  0.00           N
ATOM   1945  H   CYS A 421     110.940  46.400  29.320  1.00  0.00           H
ATOM   1946  CA  CYS A 421     109.600  44.780  29.600  1.00  0.00           C
ATOM   1947  HA  CYS A 421     108.640  44.920  29.110  1.00  0.00           H
ATOM   1948  CB  CYS A 421     110.570  44.080  28.710  1.00  0.00           C
ATOM   1949  HB1 CYS A 421     110.150  43.070  28.580  1.00  0.00           H
ATOM   1950  HB2 CYS A 421     111.560  44.060  29.160  1.00  0.00           H
ATOM   1951  SG  CYS A 421     110.450  44.880  27.060  1.00  0.00           S
ATOM   1952  HG  CYS A 421     111.050  46.060  27.230  1.00  0.00           H
ATOM   1953  C   CYS A 421     109.430  43.920  30.820  1.00  0.00           C
ATOM   1954  O   CYS A 421     108.490  43.130  30.830  1.00  0.00           O
ATOM   1955  N   LEU A 422     110.300  44.110  31.840  1.00  0.00           N
ATOM   1956  H   LEU A 422     111.130  44.650  31.640  1.00  0.00           H
ATOM   1957  CA  LEU A 422     110.170  43.540  33.220  1.00  0.00           C
ATOM   1958  HA  LEU A 422     110.170  42.450  33.160  1.00  0.00           H
ATOM   1959  CB  LEU A 422     111.360  43.990  34.080  1.00  0.00           C
ATOM   1960  HB1 LEU A 422     111.410  45.070  33.920  1.00  0.00           H
ATOM   1961  HB2 LEU A 422     112.330  43.710  33.680  1.00  0.00           H
ATOM   1962  CG  LEU A 422     111.390  43.660  35.580  1.00  0.00           C
ATOM   1963  HG  LEU A 422     110.410  43.750  36.060  1.00  0.00           H
ATOM   1964  CD1 LEU A 422     111.940  42.240  35.680  1.00  0.00           C
ATOM   1965 1HD1 LEU A 422     111.290  41.620  35.070  1.00  0.00           H
ATOM   1966 2HD1 LEU A 422     112.990  42.230  35.360  1.00  0.00           H
ATOM   1967 3HD1 LEU A 422     111.850  41.910  36.720  1.00  0.00           H
ATOM   1968  CD2 LEU A 422     112.340  44.570  36.290  1.00  0.00           C
ATOM   1969 1HD2 LEU A 422     112.410  44.240  37.320  1.00  0.00           H
ATOM   1970 2HD2 LEU A 422     113.310  44.430  35.810  1.00  0.00           H
ATOM   1971 3HD2 LEU A 422     112.120  45.630  36.130  1.00  0.00           H
ATOM   1972  C   LEU A 422     108.810  43.960  33.820  1.00  0.00           C
ATOM   1973  O   LEU A 422     107.970  43.090  34.150  1.00  0.00           O
ATOM   1974  N   ALA A 423     108.560  45.260  34.020  1.00  0.00           N
ATOM   1975  H   ALA A 423     109.200  45.970  33.700  1.00  0.00           H
ATOM   1976  CA  ALA A 423     107.480  45.710  34.850  1.00  0.00           C
ATOM   1977  HA  ALA A 423     107.720  45.300  35.840  1.00  0.00           H
ATOM   1978  CB  ALA A 423     107.480  47.280  34.930  1.00  0.00           C
ATOM   1979  HB1 ALA A 423     106.460  47.520  35.220  1.00  0.00           H
ATOM   1980  HB2 ALA A 423     108.180  47.540  35.720  1.00  0.00           H
ATOM   1981  HB3 ALA A 423     107.810  47.720  33.990  1.00  0.00           H
ATOM   1982  C   ALA A 423     106.070  45.260  34.440  1.00  0.00           C
ATOM   1983  O   ALA A 423     105.220  44.850  35.250  1.00  0.00           O
ATOM   1984  N   VAL A 424     105.930  45.350  33.110  1.00  0.00           N
ATOM   1985  H   VAL A 424     106.610  45.850  32.550  1.00  0.00           H
ATOM   1986  CA  VAL A 424     104.800  44.850  32.340  1.00  0.00           C
ATOM   1987  HA  VAL A 424     103.890  45.270  32.780  1.00  0.00           H
ATOM   1988  CB  VAL A 424     104.690  45.460  30.960  1.00  0.00           C
ATOM   1989  HB  VAL A 424     103.690  45.270  30.550  1.00  0.00           H
ATOM   1990  CG1 VAL A 424     104.720  47.030  31.210  1.00  0.00           C
ATOM   1991 1HG1 VAL A 424     105.700  47.490  31.210  1.00  0.00           H
ATOM   1992 2HG1 VAL A 424     104.220  47.510  30.370  1.00  0.00           H
ATOM   1993 3HG1 VAL A 424     104.160  47.420  32.060  1.00  0.00           H
ATOM   1994  CG2 VAL A 424     105.750  45.000  29.970  1.00  0.00           C
ATOM   1995 1HG2 VAL A 424     106.710  44.870  30.460  1.00  0.00           H
ATOM   1996 2HG2 VAL A 424     105.450  44.080  29.460  1.00  0.00           H
ATOM   1997 3HG2 VAL A 424     105.810  45.730  29.160  1.00  0.00           H
ATOM   1998  C   VAL A 424     104.580  43.300  32.230  1.00  0.00           C
ATOM   1999  O   VAL A 424     103.460  42.830  32.230  1.00  0.00           O
ATOM   2000  N   LEU A 425     105.660  42.510  32.310  1.00  0.00           N
ATOM   2001  H   LEU A 425     106.560  42.970  32.340  1.00  0.00           H
ATOM   2002  CA  LEU A 425     105.590  41.060  32.390  1.00  0.00           C
ATOM   2003  HA  LEU A 425     104.670  40.720  31.920  1.00  0.00           H
ATOM   2004  CB  LEU A 425     106.890  40.390  31.830  1.00  0.00           C
ATOM   2005  HB1 LEU A 425     106.910  39.360  32.220  1.00  0.00           H
ATOM   2006  HB2 LEU A 425     107.820  40.800  32.230  1.00  0.00           H
ATOM   2007  CG  LEU A 425     106.820  40.360  30.290  1.00  0.00           C
ATOM   2008  HG  LEU A 425     106.660  41.350  29.860  1.00  0.00           H
ATOM   2009  CD1 LEU A 425     108.140  39.870  29.740  1.00  0.00           C
ATOM   2010 1HD1 LEU A 425     108.480  39.030  30.340  1.00  0.00           H
ATOM   2011 2HD1 LEU A 425     108.060  39.740  28.660  1.00  0.00           H
ATOM   2012 3HD1 LEU A 425     108.940  40.590  29.920  1.00  0.00           H
ATOM   2013  CD2 LEU A 425     105.780  39.300  29.910  1.00  0.00           C
ATOM   2014 1HD2 LEU A 425     106.090  38.350  30.350  1.00  0.00           H
ATOM   2015 2HD2 LEU A 425     104.750  39.520  30.160  1.00  0.00           H
ATOM   2016 3HD2 LEU A 425     105.710  39.230  28.830  1.00  0.00           H
ATOM   2017  C   LEU A 425     105.420  40.610  33.820  1.00  0.00           C
ATOM   2018  O   LEU A 425     104.850  39.550  34.070  1.00  0.00           O
ATOM   2019  N   GLN A 426     105.700  41.420  34.840  1.00  0.00           N
ATOM   2020  H   GLN A 426     106.260  42.220  34.610  1.00  0.00           H
ATOM   2021  CA  GLN A 426     105.160  41.300  36.130  1.00  0.00           C
ATOM   2022  HA  GLN A 426     105.320  40.260  36.390  1.00  0.00           H
ATOM   2023  CB  GLN A 426     105.870  42.100  37.150  1.00  0.00           C
ATOM   2024  HB1 GLN A 426     105.300  41.970  38.070  1.00  0.00           H
ATOM   2025  HB2 GLN A 426     105.820  43.130  36.800  1.00  0.00           H
ATOM   2026  CG  GLN A 426     107.330  41.650  37.340  1.00  0.00           C
ATOM   2027  HG1 GLN A 426     107.890  42.050  36.490  1.00  0.00           H
ATOM   2028  HG2 GLN A 426     107.440  40.570  37.250  1.00  0.00           H
ATOM   2029  CD  GLN A 426     108.040  42.130  38.560  1.00  0.00           C
ATOM   2030  OE1 GLN A 426     108.020  43.270  39.010  1.00  0.00           O
ATOM   2031  NE2 GLN A 426     108.660  41.180  39.160  1.00  0.00           N
ATOM   2032 1HE2 GLN A 426     108.650  40.230  38.830  1.00  0.00           H
ATOM   2033 2HE2 GLN A 426     109.090  41.450  40.040  1.00  0.00           H
ATOM   2034  C   GLN A 426     103.670  41.580  36.220  1.00  0.00           C
ATOM   2035  O   GLN A 426     102.980  40.710  36.760  1.00  0.00           O
ATOM   2036  N   ALA A 427     103.040  42.630  35.650  1.00  0.00           N
ATOM   2037  H   ALA A 427     103.570  43.410  35.290  1.00  0.00           H
ATOM   2038  CA  ALA A 427     101.650  42.880  35.580  1.00  0.00           C
ATOM   2039  HA  ALA A 427     101.140  42.950  36.540  1.00  0.00           H
ATOM   2040  CB  ALA A 427     101.420  44.180  34.870  1.00  0.00           C
ATOM   2041  HB1 ALA A 427     101.950  44.130  33.910  1.00  0.00           H
ATOM   2042  HB2 ALA A 427     100.350  44.350  34.690  1.00  0.00           H
ATOM   2043  HB3 ALA A 427     101.780  44.980  35.520  1.00  0.00           H
ATOM   2044  C   ALA A 427     100.940  41.710  34.850  1.00  0.00           C
ATOM   2045  O   ALA A 427     100.020  41.030  35.410  1.00  0.00           O
ATOM   2046  N   LEU A 428     101.320  41.410  33.580  1.00  0.00           N
ATOM   2047  H   LEU A 428     101.970  42.060  33.170  1.00  0.00           H
ATOM   2048  CA  LEU A 428     100.720  40.380  32.690  1.00  0.00           C
ATOM   2049  HA  LEU A 428      99.650  40.540  32.560  1.00  0.00           H
ATOM   2050  CB  LEU A 428     101.350  40.290  31.290  1.00  0.00           C
ATOM   2051  HB1 LEU A 428     101.030  39.400  30.770  1.00  0.00           H
ATOM   2052  HB2 LEU A 428     102.400  40.050  31.430  1.00  0.00           H
ATOM   2053  CG  LEU A 428     101.260  41.500  30.350  1.00  0.00           C
ATOM   2054  HG  LEU A 428     101.700  42.400  30.780  1.00  0.00           H
ATOM   2055  CD1 LEU A 428     101.940  41.030  29.020  1.00  0.00           C
ATOM   2056 1HD1 LEU A 428     101.700  41.750  28.240  1.00  0.00           H
ATOM   2057 2HD1 LEU A 428     102.990  40.900  29.280  1.00  0.00           H
ATOM   2058 3HD1 LEU A 428     101.490  40.100  28.660  1.00  0.00           H
ATOM   2059  CD2 LEU A 428      99.760  41.690  30.110  1.00  0.00           C
ATOM   2060 1HD2 LEU A 428      99.220  42.230  30.890  1.00  0.00           H
ATOM   2061 2HD2 LEU A 428      99.580  42.170  29.150  1.00  0.00           H
ATOM   2062 3HD2 LEU A 428      99.320  40.690  30.080  1.00  0.00           H
ATOM   2063  C   LEU A 428     100.790  38.920  33.300  1.00  0.00           C
ATOM   2064  O   LEU A 428      99.810  38.230  33.200  1.00  0.00           O
ATOM   2065  N   SER A 429     101.860  38.680  34.150  1.00  0.00           N
ATOM   2066  H   SER A 429     102.580  39.360  34.310  1.00  0.00           H
ATOM   2067  CA  SER A 429     101.960  37.420  34.900  1.00  0.00           C
ATOM   2068  HA  SER A 429     101.980  36.630  34.160  1.00  0.00           H
ATOM   2069  CB  SER A 429     103.290  37.350  35.630  1.00  0.00           C
ATOM   2070  HB1 SER A 429     103.360  36.460  36.260  1.00  0.00           H
ATOM   2071  HB2 SER A 429     103.480  38.200  36.280  1.00  0.00           H
ATOM   2072  OG  SER A 429     104.320  37.040  34.700  1.00  0.00           O
ATOM   2073  HG  SER A 429     104.770  37.860  34.490  1.00  0.00           H
ATOM   2074  C   SER A 429     100.790  37.120  35.870  1.00  0.00           C
ATOM   2075  O   SER A 429     100.620  35.940  36.160  1.00  0.00           O
ATOM   2076  N   VAL A 430     100.140  38.100  36.420  1.00  0.00           N
ATOM   2077  H   VAL A 430     100.450  39.060  36.310  1.00  0.00           H
ATOM   2078  CA  VAL A 430      98.910  37.860  37.280  1.00  0.00           C
ATOM   2079  HA  VAL A 430      99.050  36.850  37.670  1.00  0.00           H
ATOM   2080  CB  VAL A 430      98.690  38.980  38.320  1.00  0.00           C
ATOM   2081  HB  VAL A 430      98.390  39.890  37.800  1.00  0.00           H
ATOM   2082  CG1 VAL A 430      97.520  38.670  39.200  1.00  0.00           C
ATOM   2083 1HG1 VAL A 430      97.670  37.660  39.580  1.00  0.00           H
ATOM   2084 2HG1 VAL A 430      97.450  39.370  40.030  1.00  0.00           H
ATOM   2085 3HG1 VAL A 430      96.600  38.610  38.630  1.00  0.00           H
ATOM   2086  CG2 VAL A 430      99.880  39.230  39.240  1.00  0.00           C
ATOM   2087 1HG2 VAL A 430      99.680  40.010  39.980  1.00  0.00           H
ATOM   2088 2HG2 VAL A 430     100.210  38.390  39.860  1.00  0.00           H
ATOM   2089 3HG2 VAL A 430     100.680  39.670  38.650  1.00  0.00           H
ATOM   2090  C   VAL A 430      97.630  37.840  36.420  1.00  0.00           C
ATOM   2091  O   VAL A 430      96.790  36.970  36.530  1.00  0.00           O
ATOM   2092  N   LEU A 431      97.520  38.740  35.410  1.00  0.00           N
ATOM   2093  H   LEU A 431      98.280  39.380  35.190  1.00  0.00           H
ATOM   2094  CA  LEU A 431      96.370  38.760  34.560  1.00  0.00           C
ATOM   2095  HA  LEU A 431      95.460  38.890  35.150  1.00  0.00           H
ATOM   2096  CB  LEU A 431      96.400  40.020  33.660  1.00  0.00           C
ATOM   2097  HB1 LEU A 431      95.510  39.910  33.030  1.00  0.00           H
ATOM   2098  HB2 LEU A 431      97.330  39.930  33.080  1.00  0.00           H
ATOM   2099  CG  LEU A 431      96.430  41.430  34.340  1.00  0.00           C
ATOM   2100  HG  LEU A 431      97.110  41.520  35.190  1.00  0.00           H
ATOM   2101  CD1 LEU A 431      97.030  42.400  33.400  1.00  0.00           C
ATOM   2102 1HD1 LEU A 431      98.080  42.230  33.160  1.00  0.00           H
ATOM   2103 2HD1 LEU A 431      96.410  42.370  32.500  1.00  0.00           H
ATOM   2104 3HD1 LEU A 431      96.970  43.410  33.800  1.00  0.00           H
ATOM   2105  CD2 LEU A 431      95.010  41.870  34.700  1.00  0.00           C
ATOM   2106 1HD2 LEU A 431      94.370  42.040  33.830  1.00  0.00           H
ATOM   2107 2HD2 LEU A 431      94.600  41.100  35.350  1.00  0.00           H
ATOM   2108 3HD2 LEU A 431      95.070  42.800  35.270  1.00  0.00           H
ATOM   2109  C   LEU A 431      96.280  37.450  33.690  1.00  0.00           C
ATOM   2110  O   LEU A 431      95.260  36.830  33.620  1.00  0.00           O
ATOM   2111  N   HIS A 432      97.290  36.950  33.040  1.00  0.00           N
ATOM   2112  H   HIS A 432      98.160  37.470  33.000  1.00  0.00           H
ATOM   2113  CA  HIS A 432      97.300  35.670  32.330  1.00  0.00           C
ATOM   2114  HA  HIS A 432      96.430  35.720  31.670  1.00  0.00           H
ATOM   2115  CB  HIS A 432      98.590  35.470  31.480  1.00  0.00           C
ATOM   2116  HB1 HIS A 432      98.650  34.510  30.980  1.00  0.00           H
ATOM   2117  HB2 HIS A 432      99.440  35.580  32.150  1.00  0.00           H
ATOM   2118  CG  HIS A 432      98.830  36.450  30.350  1.00  0.00           C
ATOM   2119  ND1 HIS A 432      99.950  36.520  29.530  1.00  0.00           N
ATOM   2120  CE1 HIS A 432      99.770  37.550  28.680  1.00  0.00           C
ATOM   2121  HE1 HIS A 432     100.480  37.960  27.990  1.00  0.00           H
ATOM   2122  NE2 HIS A 432      98.530  37.990  28.850  1.00  0.00           N
ATOM   2123  HE2 HIS A 432      98.140  38.770  28.340  1.00  0.00           H
ATOM   2124  CD2 HIS A 432      98.000  37.420  29.920  1.00  0.00           C
ATOM   2125  HD2 HIS A 432      97.020  37.570  30.360  1.00  0.00           H
ATOM   2126  C   HIS A 432      97.100  34.460  33.310  1.00  0.00           C
ATOM   2127  O   HIS A 432      96.670  33.440  32.850  1.00  0.00           O
ATOM   2128  N   ALA A 433      97.550  34.600  34.570  1.00  0.00           N
ATOM   2129  H   ALA A 433      98.060  35.440  34.820  1.00  0.00           H
ATOM   2130  CA  ALA A 433      97.330  33.490  35.540  1.00  0.00           C
ATOM   2131  HA  ALA A 433      97.680  32.520  35.160  1.00  0.00           H
ATOM   2132  CB  ALA A 433      98.110  33.770  36.860  1.00  0.00           C
ATOM   2133  HB1 ALA A 433      98.020  32.910  37.520  1.00  0.00           H
ATOM   2134  HB2 ALA A 433      99.170  33.860  36.610  1.00  0.00           H
ATOM   2135  HB3 ALA A 433      97.810  34.720  37.310  1.00  0.00           H
ATOM   2136  C   ALA A 433      95.870  33.330  35.960  1.00  0.00           C
ATOM   2137  O   ALA A 433      95.380  32.260  36.180  1.00  0.00           O
ATOM   2138  N   GLN A 434      95.110  34.500  35.970  1.00  0.00           N
ATOM   2139  H   GLN A 434      95.650  35.340  35.830  1.00  0.00           H
ATOM   2140  CA  GLN A 434      93.700  34.560  36.290  1.00  0.00           C
ATOM   2141  HA  GLN A 434      93.320  33.840  37.020  1.00  0.00           H
ATOM   2142  CB  GLN A 434      93.460  35.860  37.150  1.00  0.00           C
ATOM   2143  HB1 GLN A 434      92.400  36.020  37.330  1.00  0.00           H
ATOM   2144  HB2 GLN A 434      93.900  36.720  36.640  1.00  0.00           H
ATOM   2145  CG  GLN A 434      94.220  35.820  38.470  1.00  0.00           C
ATOM   2146  HG1 GLN A 434      95.280  35.680  38.250  1.00  0.00           H
ATOM   2147  HG2 GLN A 434      93.910  35.030  39.140  1.00  0.00           H
ATOM   2148  CD  GLN A 434      93.990  37.080  39.340  1.00  0.00           C
ATOM   2149  OE1 GLN A 434      93.420  38.040  38.850  1.00  0.00           O
ATOM   2150  NE2 GLN A 434      94.340  37.190  40.580  1.00  0.00           N
ATOM   2151 1HE2 GLN A 434      94.700  36.400  41.080  1.00  0.00           H
ATOM   2152 2HE2 GLN A 434      94.130  38.080  41.000  1.00  0.00           H
ATOM   2153  C   GLN A 434      92.790  34.490  35.060  1.00  0.00           C
ATOM   2154  O   GLN A 434      91.640  34.180  35.220  1.00  0.00           O
ATOM   2155  N   GLY A 435      93.310  34.670  33.870  1.00  0.00           N
ATOM   2156  H   GLY A 435      94.190  35.170  33.920  1.00  0.00           H
ATOM   2157  CA  GLY A 435      92.750  34.330  32.560  1.00  0.00           C
ATOM   2158  HA1 GLY A 435      91.950  33.590  32.660  1.00  0.00           H
ATOM   2159  HA2 GLY A 435      93.570  33.950  31.940  1.00  0.00           H
ATOM   2160  C   GLY A 435      92.230  35.500  31.720  1.00  0.00           C
ATOM   2161  O   GLY A 435      91.170  35.310  31.050  1.00  0.00           O
ATOM   2162  N   VAL A 436      92.890  36.700  31.780  1.00  0.00           N
ATOM   2163  H   VAL A 436      93.630  36.790  32.460  1.00  0.00           H
ATOM   2164  CA  VAL A 436      92.540  37.900  31.040  1.00  0.00           C
ATOM   2165  HA  VAL A 436      91.490  37.730  30.780  1.00  0.00           H
ATOM   2166  CB  VAL A 436      92.840  39.330  31.730  1.00  0.00           C
ATOM   2167  HB  VAL A 436      93.900  39.530  31.600  1.00  0.00           H
ATOM   2168  CG1 VAL A 436      92.030  40.590  31.210  1.00  0.00           C
ATOM   2169 1HG1 VAL A 436      92.170  40.570  30.130  1.00  0.00           H
ATOM   2170 2HG1 VAL A 436      90.990  40.460  31.520  1.00  0.00           H
ATOM   2171 3HG1 VAL A 436      92.440  41.540  31.540  1.00  0.00           H
ATOM   2172  CG2 VAL A 436      92.670  39.270  33.240  1.00  0.00           C
ATOM   2173 1HG2 VAL A 436      93.130  38.330  33.560  1.00  0.00           H
ATOM   2174 2HG2 VAL A 436      93.290  40.070  33.650  1.00  0.00           H
ATOM   2175 3HG2 VAL A 436      91.620  39.410  33.470  1.00  0.00           H
ATOM   2176  C   VAL A 436      93.370  37.880  29.730  1.00  0.00           C
ATOM   2177  O   VAL A 436      94.550  37.530  29.730  1.00  0.00           O
ATOM   2178  N   ILE A 437      92.780  38.410  28.670  1.00  0.00           N
ATOM   2179  H   ILE A 437      91.850  38.760  28.840  1.00  0.00           H
ATOM   2180  CA  ILE A 437      93.410  38.750  27.370  1.00  0.00           C
ATOM   2181  HA  ILE A 437      94.470  38.510  27.240  1.00  0.00           H
ATOM   2182  CB  ILE A 437      92.670  38.140  26.130  1.00  0.00           C
ATOM   2183  HB  ILE A 437      91.790  38.780  26.040  1.00  0.00           H
ATOM   2184  CG2 ILE A 437      93.530  38.140  24.870  1.00  0.00           C
ATOM   2185 1HG2 ILE A 437      94.140  39.040  24.760  1.00  0.00           H
ATOM   2186 2HG2 ILE A 437      94.200  37.290  25.010  1.00  0.00           H
ATOM   2187 3HG2 ILE A 437      92.910  38.000  23.980  1.00  0.00           H
ATOM   2188  CG1 ILE A 437      92.160  36.730  26.390  1.00  0.00           C
ATOM   2189 1HG1 ILE A 437      91.540  36.800  27.290  1.00  0.00           H
ATOM   2190 2HG1 ILE A 437      92.940  36.010  26.630  1.00  0.00           H
ATOM   2191  CD  ILE A 437      91.240  36.170  25.260  1.00  0.00           C
ATOM   2192  HD1 ILE A 437      90.870  35.210  25.600  1.00  0.00           H
ATOM   2193  HD2 ILE A 437      90.380  36.760  24.950  1.00  0.00           H
ATOM   2194  HD3 ILE A 437      91.750  36.100  24.290  1.00  0.00           H
ATOM   2195  C   ILE A 437      93.350  40.270  27.250  1.00  0.00           C
ATOM   2196  O   ILE A 437      92.280  40.830  27.370  1.00  0.00           O
ATOM   2197  N   HIS A 438      94.490  40.930  26.890  1.00  0.00           N
ATOM   2198  H   HIS A 438      95.260  40.290  26.770  1.00  0.00           H
ATOM   2199  CA  HIS A 438      94.620  42.410  26.790  1.00  0.00           C
ATOM   2200  HA  HIS A 438      93.860  42.910  27.390  1.00  0.00           H
ATOM   2201  CB  HIS A 438      96.020  42.860  27.360  1.00  0.00           C
ATOM   2202  HB1 HIS A 438      96.780  42.660  26.600  1.00  0.00           H
ATOM   2203  HB2 HIS A 438      96.210  42.290  28.260  1.00  0.00           H
ATOM   2204  CG  HIS A 438      96.140  44.360  27.640  1.00  0.00           C
ATOM   2205  ND1 HIS A 438      96.390  45.330  26.690  1.00  0.00           N
ATOM   2206  CE1 HIS A 438      96.270  46.530  27.320  1.00  0.00           C
ATOM   2207  HE1 HIS A 438      96.460  47.500  26.890  1.00  0.00           H
ATOM   2208  NE2 HIS A 438      96.040  46.330  28.620  1.00  0.00           N
ATOM   2209  HE2 HIS A 438      95.910  47.140  29.210  1.00  0.00           H
ATOM   2210  CD2 HIS A 438      95.910  44.940  28.840  1.00  0.00           C
ATOM   2211  HD2 HIS A 438      95.620  44.430  29.750  1.00  0.00           H
ATOM   2212  C   HIS A 438      94.520  42.910  25.350  1.00  0.00           C
ATOM   2213  O   HIS A 438      93.910  43.930  25.090  1.00  0.00           O
ATOM   2214  N   ARG A 439      95.070  42.200  24.350  1.00  0.00           N
ATOM   2215  H   ARG A 439      95.520  41.340  24.630  1.00  0.00           H
ATOM   2216  CA  ARG A 439      94.980  42.410  22.910  1.00  0.00           C
ATOM   2217  HA  ARG A 439      95.510  41.600  22.400  1.00  0.00           H
ATOM   2218  CB  ARG A 439      93.430  42.410  22.440  1.00  0.00           C
ATOM   2219  HB1 ARG A 439      93.300  42.550  21.370  1.00  0.00           H
ATOM   2220  HB2 ARG A 439      92.930  43.210  22.980  1.00  0.00           H
ATOM   2221  CG  ARG A 439      92.750  41.070  22.760  1.00  0.00           C
ATOM   2222  HG1 ARG A 439      92.780  40.830  23.820  1.00  0.00           H
ATOM   2223  HG2 ARG A 439      93.160  40.310  22.090  1.00  0.00           H
ATOM   2224  CD  ARG A 439      91.290  41.030  22.390  1.00  0.00           C
ATOM   2225  HD1 ARG A 439      90.940  39.990  22.350  1.00  0.00           H
ATOM   2226  HD2 ARG A 439      91.190  41.290  21.330  1.00  0.00           H
ATOM   2227  NE  ARG A 439      90.310  41.850  23.110  1.00  0.00           N
ATOM   2228  HE  ARG A 439      90.670  42.550  23.760  1.00  0.00           H
ATOM   2229  CZ  ARG A 439      89.040  41.480  23.230  1.00  0.00           C
ATOM   2230  NH1 ARG A 439      88.280  42.030  24.030  1.00  0.00           N
ATOM   2231 1HH1 ARG A 439      88.700  42.570  24.780  1.00  0.00           H
ATOM   2232 2HH1 ARG A 439      87.350  41.680  24.190  1.00  0.00           H
ATOM   2233  NH2 ARG A 439      88.520  40.490  22.550  1.00  0.00           N
ATOM   2234 1HH2 ARG A 439      89.110  39.930  21.940  1.00  0.00           H
ATOM   2235 2HH2 ARG A 439      87.560  40.260  22.720  1.00  0.00           H
ATOM   2236  C   ARG A 439      95.620  43.720  22.380  1.00  0.00           C
ATOM   2237  O   ARG A 439      95.580  43.940  21.160  1.00  0.00           O
ATOM   2238  N   ASP A 440      96.110  44.660  23.220  1.00  0.00           N
ATOM   2239  H   ASP A 440      96.040  44.620  24.230  1.00  0.00           H
ATOM   2240  CA  ASP A 440      96.260  46.110  22.810  1.00  0.00           C
ATOM   2241  HA  ASP A 440      96.260  46.200  21.730  1.00  0.00           H
ATOM   2242  CB  ASP A 440      94.980  46.850  23.320  1.00  0.00           C
ATOM   2243  HB1 ASP A 440      95.080  47.160  24.360  1.00  0.00           H
ATOM   2244  HB2 ASP A 440      94.160  46.140  23.230  1.00  0.00           H
ATOM   2245  CG  ASP A 440      94.600  48.240  22.610  1.00  0.00           C
ATOM   2246  OD1 ASP A 440      94.510  48.270  21.380  1.00  0.00           O
ATOM   2247  OD2 ASP A 440      94.400  49.260  23.250  1.00  0.00           O
ATOM   2248  C   ASP A 440      97.520  46.840  23.230  1.00  0.00           C
ATOM   2249  O   ASP A 440      97.490  48.040  23.360  1.00  0.00           O
ATOM   2250  N   ILE A 441      98.610  46.110  23.520  1.00  0.00           N
ATOM   2251  H   ILE A 441      98.570  45.120  23.300  1.00  0.00           H
ATOM   2252  CA  ILE A 441      99.780  46.640  24.210  1.00  0.00           C
ATOM   2253  HA  ILE A 441      99.480  47.300  25.020  1.00  0.00           H
ATOM   2254  CB  ILE A 441     100.600  45.500  24.920  1.00  0.00           C
ATOM   2255  HB  ILE A 441     100.900  44.840  24.100  1.00  0.00           H
ATOM   2256  CG2 ILE A 441     101.980  46.000  25.510  1.00  0.00           C
ATOM   2257 1HG2 ILE A 441     102.720  46.170  24.730  1.00  0.00           H
ATOM   2258 2HG2 ILE A 441     101.880  46.850  26.180  1.00  0.00           H
ATOM   2259 3HG2 ILE A 441     102.340  45.190  26.150  1.00  0.00           H
ATOM   2260  CG1 ILE A 441      99.620  44.800  25.900  1.00  0.00           C
ATOM   2261 1HG1 ILE A 441      98.870  44.260  25.310  1.00  0.00           H
ATOM   2262 2HG1 ILE A 441      99.170  45.580  26.510  1.00  0.00           H
ATOM   2263  CD  ILE A 441     100.170  43.820  26.910  1.00  0.00           C
ATOM   2264  HD1 ILE A 441     100.840  43.090  26.450  1.00  0.00           H
ATOM   2265  HD2 ILE A 441     100.670  44.360  27.710  1.00  0.00           H
ATOM   2266  HD3 ILE A 441      99.310  43.320  27.370  1.00  0.00           H
ATOM   2267  C   ILE A 441     100.600  47.360  23.190  1.00  0.00           C
ATOM   2268  O   ILE A 441     101.030  46.770  22.190  1.00  0.00           O
ATOM   2269  N   LYS A 442     100.890  48.600  23.420  1.00  0.00           N
ATOM   2270  H   LYS A 442     100.490  49.000  24.260  1.00  0.00           H
ATOM   2271  CA  LYS A 442     101.670  49.550  22.600  1.00  0.00           C
ATOM   2272  HA  LYS A 442     102.510  49.010  22.160  1.00  0.00           H
ATOM   2273  CB  LYS A 442     100.720  49.980  21.540  1.00  0.00           C
ATOM   2274  HB1 LYS A 442     100.250  49.110  21.080  1.00  0.00           H
ATOM   2275  HB2 LYS A 442     101.340  50.500  20.810  1.00  0.00           H
ATOM   2276  CG  LYS A 442      99.580  50.880  22.030  1.00  0.00           C
ATOM   2277  HG1 LYS A 442      99.930  51.830  22.430  1.00  0.00           H
ATOM   2278  HG2 LYS A 442      99.110  50.200  22.740  1.00  0.00           H
ATOM   2279  CD  LYS A 442      98.480  51.230  21.020  1.00  0.00           C
ATOM   2280  HD1 LYS A 442      98.300  50.270  20.540  1.00  0.00           H
ATOM   2281  HD2 LYS A 442      98.810  51.890  20.220  1.00  0.00           H
ATOM   2282  CE  LYS A 442      97.220  51.750  21.650  1.00  0.00           C
ATOM   2283  HE1 LYS A 442      96.450  51.980  20.910  1.00  0.00           H
ATOM   2284  HE2 LYS A 442      97.450  52.700  22.130  1.00  0.00           H
ATOM   2285  NZ  LYS A 442      96.650  50.760  22.650  1.00  0.00           N
ATOM   2286  HZ1 LYS A 442      97.400  50.180  22.990  1.00  0.00           H
ATOM   2287  HZ2 LYS A 442      96.250  51.200  23.470  1.00  0.00           H
ATOM   2288  HZ3 LYS A 442      96.090  50.140  22.090  1.00  0.00           H
ATOM   2289  C   LYS A 442     102.250  50.640  23.470  1.00  0.00           C
ATOM   2290  O   LYS A 442     101.810  50.810  24.610  1.00  0.00           O
ATOM   2291  N   SER A 443     103.180  51.550  23.070  1.00  0.00           N
ATOM   2292  H   SER A 443     103.310  51.670  22.070  1.00  0.00           H
ATOM   2293  CA  SER A 443     103.760  52.570  23.970  1.00  0.00           C
ATOM   2294  HA  SER A 443     104.010  52.010  24.870  1.00  0.00           H
ATOM   2295  CB  SER A 443     105.010  53.190  23.330  1.00  0.00           C
ATOM   2296  HB1 SER A 443     105.530  53.720  24.130  1.00  0.00           H
ATOM   2297  HB2 SER A 443     104.820  53.820  22.460  1.00  0.00           H
ATOM   2298  OG  SER A 443     105.880  52.210  22.900  1.00  0.00           O
ATOM   2299  HG  SER A 443     105.570  51.840  22.070  1.00  0.00           H
ATOM   2300  C   SER A 443     102.730  53.660  24.340  1.00  0.00           C
ATOM   2301  O   SER A 443     103.080  54.500  25.170  1.00  0.00           O
ATOM   2302  N   ASP A 444     101.540  53.800  23.750  1.00  0.00           N
ATOM   2303  H   ASP A 444     101.210  53.050  23.160  1.00  0.00           H
ATOM   2304  CA  ASP A 444     100.480  54.640  24.180  1.00  0.00           C
ATOM   2305  HA  ASP A 444     100.920  55.570  24.540  1.00  0.00           H
ATOM   2306  CB  ASP A 444      99.470  54.910  23.090  1.00  0.00           C
ATOM   2307  HB1 ASP A 444      98.610  55.400  23.530  1.00  0.00           H
ATOM   2308  HB2 ASP A 444      99.140  53.900  22.850  1.00  0.00           H
ATOM   2309  CG  ASP A 444      99.870  55.630  21.770  1.00  0.00           C
ATOM   2310  OD1 ASP A 444      99.760  55.040  20.640  1.00  0.00           O
ATOM   2311  OD2 ASP A 444     100.130  56.820  21.910  1.00  0.00           O
ATOM   2312  C   ASP A 444      99.770  53.990  25.420  1.00  0.00           C
ATOM   2313  O   ASP A 444      98.990  54.630  26.080  1.00  0.00           O
ATOM   2314  N   SER A 445     100.210  52.770  25.760  1.00  0.00           N
ATOM   2315  H   SER A 445     100.760  52.220  25.120  1.00  0.00           H
ATOM   2316  CA  SER A 445      99.540  51.900  26.770  1.00  0.00           C
ATOM   2317  HA  SER A 445      98.600  52.340  27.120  1.00  0.00           H
ATOM   2318  CB  SER A 445      99.250  50.490  26.280  1.00  0.00           C
ATOM   2319  HB1 SER A 445      98.710  49.890  27.010  1.00  0.00           H
ATOM   2320  HB2 SER A 445     100.180  50.080  25.880  1.00  0.00           H
ATOM   2321  OG  SER A 445      98.470  50.590  25.180  1.00  0.00           O
ATOM   2322  HG  SER A 445      97.740  51.120  25.500  1.00  0.00           H
ATOM   2323  C   SER A 445     100.310  51.840  28.090  1.00  0.00           C
ATOM   2324  O   SER A 445      99.670  51.600  29.110  1.00  0.00           O
ATOM   2325  N   ILE A 446     101.580  52.220  28.130  1.00  0.00           N
ATOM   2326  H   ILE A 446     101.940  52.450  27.210  1.00  0.00           H
ATOM   2327  CA  ILE A 446     102.500  52.140  29.250  1.00  0.00           C
ATOM   2328  HA  ILE A 446     101.970  51.730  30.120  1.00  0.00           H
ATOM   2329  CB  ILE A 446     103.740  51.370  28.840  1.00  0.00           C
ATOM   2330  HB  ILE A 446     104.430  52.030  28.320  1.00  0.00           H
ATOM   2331  CG2 ILE A 446     104.450  50.950  30.090  1.00  0.00           C
ATOM   2332 1HG2 ILE A 446     105.320  50.300  29.940  1.00  0.00           H
ATOM   2333 2HG2 ILE A 446     104.930  51.750  30.650  1.00  0.00           H
ATOM   2334 3HG2 ILE A 446     103.680  50.510  30.710  1.00  0.00           H
ATOM   2335  CG1 ILE A 446     103.500  50.170  27.890  1.00  0.00           C
ATOM   2336 1HG1 ILE A 446     104.500  49.800  27.680  1.00  0.00           H
ATOM   2337 2HG1 ILE A 446     103.130  50.500  26.920  1.00  0.00           H
ATOM   2338  CD  ILE A 446     102.580  48.980  28.400  1.00  0.00           C
ATOM   2339  HD1 ILE A 446     102.810  48.750  29.440  1.00  0.00           H
ATOM   2340  HD2 ILE A 446     101.560  49.360  28.380  1.00  0.00           H
ATOM   2341  HD3 ILE A 446     102.630  48.180  27.660  1.00  0.00           H
ATOM   2342  C   ILE A 446     102.850  53.610  29.640  1.00  0.00           C
ATOM   2343  O   ILE A 446     103.270  54.420  28.840  1.00  0.00           O
ATOM   2344  N   LEU A 447     102.550  53.950  30.930  1.00  0.00           N
ATOM   2345  H   LEU A 447     102.290  53.220  31.570  1.00  0.00           H
ATOM   2346  CA  LEU A 447     102.600  55.330  31.390  1.00  0.00           C
ATOM   2347  HA  LEU A 447     103.040  55.950  30.620  1.00  0.00           H
ATOM   2348  CB  LEU A 447     101.110  55.690  31.770  1.00  0.00           C
ATOM   2349  HB1 LEU A 447     101.150  56.670  32.240  1.00  0.00           H
ATOM   2350  HB2 LEU A 447     100.910  55.040  32.620  1.00  0.00           H
ATOM   2351  CG  LEU A 447     100.000  55.790  30.670  1.00  0.00           C
ATOM   2352  HG  LEU A 447      99.830  54.770  30.330  1.00  0.00           H
ATOM   2353  CD1 LEU A 447      98.690  56.280  31.340  1.00  0.00           C
ATOM   2354 1HD1 LEU A 447      98.420  55.730  32.240  1.00  0.00           H
ATOM   2355 2HD1 LEU A 447      98.730  57.330  31.630  1.00  0.00           H
ATOM   2356 3HD1 LEU A 447      97.920  56.190  30.570  1.00  0.00           H
ATOM   2357  CD2 LEU A 447     100.160  56.780  29.520  1.00  0.00           C
ATOM   2358 1HD2 LEU A 447     100.490  57.770  29.830  1.00  0.00           H
ATOM   2359 2HD2 LEU A 447     100.960  56.330  28.920  1.00  0.00           H
ATOM   2360 3HD2 LEU A 447      99.300  56.760  28.840  1.00  0.00           H
ATOM   2361  C   LEU A 447     103.610  55.370  32.530  1.00  0.00           C
ATOM   2362  O   LEU A 447     103.740  54.360  33.240  1.00  0.00           O
ATOM   2363  N   LEU A 448     104.180  56.570  32.840  1.00  0.00           N
ATOM   2364  H   LEU A 448     103.980  57.410  32.320  1.00  0.00           H
ATOM   2365  CA  LEU A 448     105.220  56.710  33.890  1.00  0.00           C
ATOM   2366  HA  LEU A 448     105.340  55.760  34.410  1.00  0.00           H
ATOM   2367  CB  LEU A 448     106.620  57.000  33.310  1.00  0.00           C
ATOM   2368  HB1 LEU A 448     107.370  56.880  34.100  1.00  0.00           H
ATOM   2369  HB2 LEU A 448     106.730  58.040  32.980  1.00  0.00           H
ATOM   2370  CG  LEU A 448     106.990  56.070  32.160  1.00  0.00           C
ATOM   2371  HG  LEU A 448     106.460  55.130  32.310  1.00  0.00           H
ATOM   2372  CD1 LEU A 448     106.790  56.700  30.760  1.00  0.00           C
ATOM   2373 1HD1 LEU A 448     106.560  55.950  30.010  1.00  0.00           H
ATOM   2374 2HD1 LEU A 448     105.930  57.360  30.780  1.00  0.00           H
ATOM   2375 3HD1 LEU A 448     107.690  57.310  30.640  1.00  0.00           H
ATOM   2376  CD2 LEU A 448     108.440  55.590  32.240  1.00  0.00           C
ATOM   2377 1HD2 LEU A 448     109.090  56.440  32.060  1.00  0.00           H
ATOM   2378 2HD2 LEU A 448     108.650  55.270  33.260  1.00  0.00           H
ATOM   2379 3HD2 LEU A 448     108.600  54.750  31.560  1.00  0.00           H
ATOM   2380  C   LEU A 448     104.890  57.770  34.980  1.00  0.00           C
ATOM   2381  O   LEU A 448     104.130  58.640  34.790  1.00  0.00           O
ATOM   2382  N   THR A 449     105.400  57.580  36.220  1.00  0.00           N
ATOM   2383  H   THR A 449     106.020  56.790  36.350  1.00  0.00           H
ATOM   2384  CA  THR A 449     105.300  58.570  37.310  1.00  0.00           C
ATOM   2385  HA  THR A 449     104.350  59.090  37.110  1.00  0.00           H
ATOM   2386  CB  THR A 449     105.200  57.830  38.590  1.00  0.00           C
ATOM   2387  HB  THR A 449     105.280  58.560  39.390  1.00  0.00           H
ATOM   2388  CG2 THR A 449     103.870  57.220  38.840  1.00  0.00           C
ATOM   2389 1HG2 THR A 449     103.140  58.020  38.970  1.00  0.00           H
ATOM   2390 2HG2 THR A 449     103.560  56.590  38.000  1.00  0.00           H
ATOM   2391 3HG2 THR A 449     103.930  56.570  39.710  1.00  0.00           H
ATOM   2392  OG1 THR A 449     106.180  56.840  38.720  1.00  0.00           O
ATOM   2393  HG1 THR A 449     106.510  56.820  39.620  1.00  0.00           H
ATOM   2394  C   THR A 449     106.420  59.530  37.420  1.00  0.00           C
ATOM   2395  O   THR A 449     107.440  59.300  36.790  1.00  0.00           O
ATOM   2396  N   HIS A 450     106.280  60.530  38.280  1.00  0.00           N
ATOM   2397  H   HIS A 450     105.400  60.650  38.760  1.00  0.00           H
ATOM   2398  CA  HIS A 450     107.340  61.520  38.550  1.00  0.00           C
ATOM   2399  HA  HIS A 450     107.460  62.130  37.650  1.00  0.00           H
ATOM   2400  CB  HIS A 450     106.770  62.410  39.660  1.00  0.00           C
ATOM   2401  HB1 HIS A 450     105.780  62.750  39.370  1.00  0.00           H
ATOM   2402  HB2 HIS A 450     107.430  63.260  39.860  1.00  0.00           H
ATOM   2403  CG  HIS A 450     106.620  61.670  40.990  1.00  0.00           C
ATOM   2404  ND1 HIS A 450     105.600  60.770  41.290  1.00  0.00           N
ATOM   2405  CE1 HIS A 450     105.830  60.310  42.510  1.00  0.00           C
ATOM   2406  HE1 HIS A 450     105.270  59.560  43.050  1.00  0.00           H
ATOM   2407  NE2 HIS A 450     107.000  60.860  42.950  1.00  0.00           N
ATOM   2408  HE2 HIS A 450     107.430  60.570  43.810  1.00  0.00           H
ATOM   2409  CD2 HIS A 450     107.420  61.790  42.080  1.00  0.00           C
ATOM   2410  HD2 HIS A 450     108.310  62.360  42.270  1.00  0.00           H
ATOM   2411  C   HIS A 450     108.650  60.880  38.920  1.00  0.00           C
ATOM   2412  O   HIS A 450     109.680  61.480  38.600  1.00  0.00           O
ATOM   2413  N   ASP A 451     108.650  59.780  39.650  1.00  0.00           N
ATOM   2414  H   ASP A 451     107.790  59.460  40.060  1.00  0.00           H
ATOM   2415  CA  ASP A 451     109.890  59.030  40.090  1.00  0.00           C
ATOM   2416  HA  ASP A 451     110.750  59.690  40.120  1.00  0.00           H
ATOM   2417  CB  ASP A 451     109.680  58.430  41.510  1.00  0.00           C
ATOM   2418  HB1 ASP A 451     109.620  59.230  42.250  1.00  0.00           H
ATOM   2419  HB2 ASP A 451     110.570  57.910  41.870  1.00  0.00           H
ATOM   2420  CG  ASP A 451     108.540  57.430  41.620  1.00  0.00           C
ATOM   2421  OD1 ASP A 451     108.580  56.570  42.550  1.00  0.00           O
ATOM   2422  OD2 ASP A 451     107.610  57.390  40.810  1.00  0.00           O
ATOM   2423  C   ASP A 451     110.410  57.880  39.160  1.00  0.00           C
ATOM   2424  O   ASP A 451     111.340  57.190  39.480  1.00  0.00           O
ATOM   2425  N   GLY A 452     109.790  57.810  37.940  1.00  0.00           N
ATOM   2426  H   GLY A 452     108.910  58.280  37.810  1.00  0.00           H
ATOM   2427  CA  GLY A 452     110.390  57.130  36.840  1.00  0.00           C
ATOM   2428  HA1 GLY A 452     111.470  57.230  36.960  1.00  0.00           H
ATOM   2429  HA2 GLY A 452     110.030  57.690  35.980  1.00  0.00           H
ATOM   2430  C   GLY A 452     109.970  55.700  36.620  1.00  0.00           C
ATOM   2431  O   GLY A 452     110.610  55.070  35.740  1.00  0.00           O
ATOM   2432  N   ARG A 453     108.970  55.160  37.360  1.00  0.00           N
ATOM   2433  H   ARG A 453     108.490  55.750  38.040  1.00  0.00           H
ATOM   2434  CA  ARG A 453     108.470  53.790  37.300  1.00  0.00           C
ATOM   2435  HA  ARG A 453     109.350  53.180  37.090  1.00  0.00           H
ATOM   2436  CB  ARG A 453     107.960  53.340  38.660  1.00  0.00           C
ATOM   2437  HB1 ARG A 453     107.680  52.290  38.660  1.00  0.00           H
ATOM   2438  HB2 ARG A 453     107.140  54.030  38.890  1.00  0.00           H
ATOM   2439  CG  ARG A 453     108.990  53.350  39.750  1.00  0.00           C
ATOM   2440  HG1 ARG A 453     109.510  54.300  39.860  1.00  0.00           H
ATOM   2441  HG2 ARG A 453     109.610  52.460  39.640  1.00  0.00           H
ATOM   2442  CD  ARG A 453     108.270  53.070  41.090  1.00  0.00           C
ATOM   2443  HD1 ARG A 453     109.040  53.030  41.870  1.00  0.00           H
ATOM   2444  HD2 ARG A 453     107.730  52.140  40.960  1.00  0.00           H
ATOM   2445  NE  ARG A 453     107.420  54.300  41.410  1.00  0.00           N
ATOM   2446  HE  ARG A 453     107.960  55.100  41.700  1.00  0.00           H
ATOM   2447  CZ  ARG A 453     106.150  54.400  41.470  1.00  0.00           C
ATOM   2448  NH1 ARG A 453     105.340  53.390  41.320  1.00  0.00           N
ATOM   2449 1HH1 ARG A 453     105.710  52.460  41.160  1.00  0.00           H
ATOM   2450 2HH1 ARG A 453     104.350  53.540  41.440  1.00  0.00           H
ATOM   2451  NH2 ARG A 453     105.640  55.620  41.670  1.00  0.00           N
ATOM   2452 1HH2 ARG A 453     106.300  56.380  41.720  1.00  0.00           H
ATOM   2453 2HH2 ARG A 453     104.630  55.720  41.640  1.00  0.00           H
ATOM   2454  C   ARG A 453     107.440  53.530  36.210  1.00  0.00           C
ATOM   2455  O   ARG A 453     106.930  54.460  35.690  1.00  0.00           O
ATOM   2456  N   VAL A 454     107.250  52.210  35.920  1.00  0.00           N
ATOM   2457  H   VAL A 454     107.690  51.450  36.420  1.00  0.00           H
ATOM   2458  CA  VAL A 454     106.430  51.900  34.720  1.00  0.00           C
ATOM   2459  HA  VAL A 454     106.170  52.790  34.150  1.00  0.00           H
ATOM   2460  CB  VAL A 454     107.390  51.010  33.850  1.00  0.00           C
ATOM   2461  HB  VAL A 454     107.650  50.070  34.340  1.00  0.00           H
ATOM   2462  CG1 VAL A 454     106.700  50.570  32.580  1.00  0.00           C
ATOM   2463 1HG1 VAL A 454     105.820  49.990  32.850  1.00  0.00           H
ATOM   2464 2HG1 VAL A 454     106.520  51.460  31.980  1.00  0.00           H
ATOM   2465 3HG1 VAL A 454     107.310  49.940  31.930  1.00  0.00           H
ATOM   2466  CG2 VAL A 454     108.670  51.740  33.370  1.00  0.00           C
ATOM   2467 1HG2 VAL A 454     109.180  51.150  32.600  1.00  0.00           H
ATOM   2468 2HG2 VAL A 454     108.450  52.750  33.040  1.00  0.00           H
ATOM   2469 3HG2 VAL A 454     109.320  51.580  34.230  1.00  0.00           H
ATOM   2470  C   VAL A 454     105.130  51.300  35.180  1.00  0.00           C
ATOM   2471  O   VAL A 454     105.100  50.480  36.090  1.00  0.00           O
ATOM   2472  N   LYS A 455     104.010  51.620  34.510  1.00  0.00           N
ATOM   2473  H   LYS A 455     104.070  52.380  33.840  1.00  0.00           H
ATOM   2474  CA  LYS A 455     102.690  50.970  34.760  1.00  0.00           C
ATOM   2475  HA  LYS A 455     102.800  49.980  35.200  1.00  0.00           H
ATOM   2476  CB  LYS A 455     101.860  51.920  35.590  1.00  0.00           C
ATOM   2477  HB1 LYS A 455     100.940  51.380  35.820  1.00  0.00           H
ATOM   2478  HB2 LYS A 455     101.650  52.820  35.000  1.00  0.00           H
ATOM   2479  CG  LYS A 455     102.470  52.450  36.950  1.00  0.00           C
ATOM   2480  HG1 LYS A 455     103.430  52.930  36.760  1.00  0.00           H
ATOM   2481  HG2 LYS A 455     102.710  51.600  37.590  1.00  0.00           H
ATOM   2482  CD  LYS A 455     101.640  53.450  37.770  1.00  0.00           C
ATOM   2483  HD1 LYS A 455     100.660  52.990  37.920  1.00  0.00           H
ATOM   2484  HD2 LYS A 455     101.420  54.280  37.090  1.00  0.00           H
ATOM   2485  CE  LYS A 455     102.240  53.850  39.160  1.00  0.00           C
ATOM   2486  HE1 LYS A 455     103.050  54.560  38.990  1.00  0.00           H
ATOM   2487  HE2 LYS A 455     102.700  53.010  39.670  1.00  0.00           H
ATOM   2488  NZ  LYS A 455     101.160  54.420  39.980  1.00  0.00           N
ATOM   2489  HZ1 LYS A 455     100.600  53.630  40.280  1.00  0.00           H
ATOM   2490  HZ2 LYS A 455     101.480  54.870  40.830  1.00  0.00           H
ATOM   2491  HZ3 LYS A 455     100.570  55.000  39.400  1.00  0.00           H
ATOM   2492  C   LYS A 455     101.950  50.600  33.420  1.00  0.00           C
ATOM   2493  O   LYS A 455     101.880  51.400  32.510  1.00  0.00           O
ATOM   2494  N   LEU A 456     101.340  49.410  33.380  1.00  0.00           N
ATOM   2495  H   LEU A 456     101.390  48.780  34.170  1.00  0.00           H
ATOM   2496  CA  LEU A 456     100.440  49.070  32.280  1.00  0.00           C
ATOM   2497  HA  LEU A 456     100.850  49.470  31.360  1.00  0.00           H
ATOM   2498  CB  LEU A 456     100.390  47.550  32.240  1.00  0.00           C
ATOM   2499  HB1 LEU A 456     100.170  47.140  33.220  1.00  0.00           H
ATOM   2500  HB2 LEU A 456     101.430  47.230  32.170  1.00  0.00           H
ATOM   2501  CG  LEU A 456      99.390  46.860  31.260  1.00  0.00           C
ATOM   2502  HG  LEU A 456      98.410  47.240  31.540  1.00  0.00           H
ATOM   2503  CD1 LEU A 456      99.620  47.150  29.780  1.00  0.00           C
ATOM   2504 1HD1 LEU A 456     100.670  46.870  29.640  1.00  0.00           H
ATOM   2505 2HD1 LEU A 456      98.910  46.550  29.210  1.00  0.00           H
ATOM   2506 3HD1 LEU A 456      99.450  48.210  29.600  1.00  0.00           H
ATOM   2507  CD2 LEU A 456      99.430  45.350  31.610  1.00  0.00           C
ATOM   2508 1HD2 LEU A 456      98.900  44.870  30.790  1.00  0.00           H
ATOM   2509 2HD2 LEU A 456     100.430  44.940  31.440  1.00  0.00           H
ATOM   2510 3HD2 LEU A 456      99.080  45.100  32.610  1.00  0.00           H
ATOM   2511  C   LEU A 456      99.050  49.730  32.560  1.00  0.00           C
ATOM   2512  O   LEU A 456      98.700  49.950  33.730  1.00  0.00           O
ATOM   2513  N   SER A 457      98.270  49.940  31.500  1.00  0.00           N
ATOM   2514  H   SER A 457      98.600  49.610  30.600  1.00  0.00           H
ATOM   2515  CA  SER A 457      97.010  50.650  31.550  1.00  0.00           C
ATOM   2516  HA  SER A 457      96.470  50.360  32.450  1.00  0.00           H
ATOM   2517  CB  SER A 457      97.300  52.130  31.590  1.00  0.00           C
ATOM   2518  HB1 SER A 457      98.120  52.350  32.260  1.00  0.00           H
ATOM   2519  HB2 SER A 457      96.450  52.730  31.920  1.00  0.00           H
ATOM   2520  OG  SER A 457      97.620  52.640  30.270  1.00  0.00           O
ATOM   2521  HG  SER A 457      98.430  52.240  29.950  1.00  0.00           H
ATOM   2522  C   SER A 457      96.130  50.210  30.340  1.00  0.00           C
ATOM   2523  O   SER A 457      96.180  49.040  29.990  1.00  0.00           O
ATOM   2524  N   ASP A 458      95.300  51.090  29.730  1.00  0.00           N
ATOM   2525  H   ASP A 458      95.420  52.070  29.950  1.00  0.00           H
ATOM   2526  CA  ASP A 458      94.630  50.850  28.470  1.00  0.00           C
ATOM   2527  HA  ASP A 458      93.850  51.610  28.450  1.00  0.00           H
ATOM   2528  CB  ASP A 458      95.620  51.030  27.250  1.00  0.00           C
ATOM   2529  HB1 ASP A 458      95.860  50.030  26.880  1.00  0.00           H
ATOM   2530  HB2 ASP A 458      96.570  51.390  27.640  1.00  0.00           H
ATOM   2531  CG  ASP A 458      95.040  52.010  26.180  1.00  0.00           C
ATOM   2532  OD1 ASP A 458      95.740  52.150  25.140  1.00  0.00           O
ATOM   2533  OD2 ASP A 458      93.980  52.620  26.390  1.00  0.00           O
ATOM   2534  C   ASP A 458      93.910  49.520  28.350  1.00  0.00           C
ATOM   2535  O   ASP A 458      94.050  48.730  27.370  1.00  0.00           O
ATOM   2536  N   PHE A 459      93.210  49.150  29.430  1.00  0.00           N
ATOM   2537  H   PHE A 459      93.170  49.810  30.200  1.00  0.00           H
ATOM   2538  CA  PHE A 459      92.560  47.820  29.680  1.00  0.00           C
ATOM   2539  HA  PHE A 459      93.070  47.040  29.120  1.00  0.00           H
ATOM   2540  CB  PHE A 459      92.500  47.580  31.240  1.00  0.00           C
ATOM   2541  HB1 PHE A 459      91.740  46.830  31.470  1.00  0.00           H
ATOM   2542  HB2 PHE A 459      92.240  48.490  31.780  1.00  0.00           H
ATOM   2543  CG  PHE A 459      93.790  47.210  31.860  1.00  0.00           C
ATOM   2544  CD1 PHE A 459      94.560  48.120  32.660  1.00  0.00           C
ATOM   2545  HD1 PHE A 459      94.240  49.140  32.820  1.00  0.00           H
ATOM   2546  CE1 PHE A 459      95.720  47.670  33.310  1.00  0.00           C
ATOM   2547  HE1 PHE A 459      96.330  48.370  33.870  1.00  0.00           H
ATOM   2548  CZ  PHE A 459      96.060  46.260  33.200  1.00  0.00           C
ATOM   2549  HZ  PHE A 459      96.960  45.880  33.660  1.00  0.00           H
ATOM   2550  CE2 PHE A 459      95.320  45.440  32.470  1.00  0.00           C
ATOM   2551  HE2 PHE A 459      95.620  44.410  32.370  1.00  0.00           H
ATOM   2552  CD2 PHE A 459      94.190  45.930  31.790  1.00  0.00           C
ATOM   2553  HD2 PHE A 459      93.590  45.250  31.190  1.00  0.00           H
ATOM   2554  C   PHE A 459      91.140  47.800  29.160  1.00  0.00           C
ATOM   2555  O   PHE A 459      90.320  46.970  29.480  1.00  0.00           O
ATOM   2556  N   GLY A 460      90.750  48.850  28.450  1.00  0.00           N
ATOM   2557  H   GLY A 460      91.420  49.530  28.140  1.00  0.00           H
ATOM   2558  CA  GLY A 460      89.440  49.080  27.930  1.00  0.00           C
ATOM   2559  HA1 GLY A 460      89.320  50.050  27.450  1.00  0.00           H
ATOM   2560  HA2 GLY A 460      88.700  48.950  28.720  1.00  0.00           H
ATOM   2561  C   GLY A 460      88.940  48.110  26.860  1.00  0.00           C
ATOM   2562  O   GLY A 460      87.800  48.200  26.360  1.00  0.00           O
ATOM   2563  N   PHE A 461      89.870  47.270  26.370  1.00  0.00           N
ATOM   2564  H   PHE A 461      90.810  47.410  26.710  1.00  0.00           H
ATOM   2565  CA  PHE A 461      89.600  46.230  25.390  1.00  0.00           C
ATOM   2566  HA  PHE A 461      88.570  46.200  25.030  1.00  0.00           H
ATOM   2567  CB  PHE A 461      90.430  46.600  24.100  1.00  0.00           C
ATOM   2568  HB1 PHE A 461      90.480  45.710  23.470  1.00  0.00           H
ATOM   2569  HB2 PHE A 461      91.430  46.860  24.430  1.00  0.00           H
ATOM   2570  CG  PHE A 461      89.920  47.800  23.260  1.00  0.00           C
ATOM   2571  CD1 PHE A 461      90.880  48.600  22.610  1.00  0.00           C
ATOM   2572  HD1 PHE A 461      91.940  48.390  22.630  1.00  0.00           H
ATOM   2573  CE1 PHE A 461      90.490  49.780  21.940  1.00  0.00           C
ATOM   2574  HE1 PHE A 461      91.290  50.370  21.510  1.00  0.00           H
ATOM   2575  CZ  PHE A 461      89.160  50.200  21.980  1.00  0.00           C
ATOM   2576  HZ  PHE A 461      88.910  51.160  21.540  1.00  0.00           H
ATOM   2577  CE2 PHE A 461      88.200  49.360  22.570  1.00  0.00           C
ATOM   2578  HE2 PHE A 461      87.180  49.670  22.730  1.00  0.00           H
ATOM   2579  CD2 PHE A 461      88.540  48.160  23.240  1.00  0.00           C
ATOM   2580  HD2 PHE A 461      87.800  47.650  23.840  1.00  0.00           H
ATOM   2581  C   PHE A 461      89.920  44.870  25.890  1.00  0.00           C
ATOM   2582  O   PHE A 461      89.930  43.910  25.100  1.00  0.00           O
ATOM   2583  N   CYS A 462      90.180  44.670  27.170  1.00  0.00           N
ATOM   2584  H   CYS A 462      90.130  45.500  27.750  1.00  0.00           H
ATOM   2585  CA  CYS A 462      90.450  43.410  27.720  1.00  0.00           C
ATOM   2586  HA  CYS A 462      91.130  42.910  27.030  1.00  0.00           H
ATOM   2587  CB  CYS A 462      91.220  43.640  29.020  1.00  0.00           C
ATOM   2588  HB1 CYS A 462      91.940  44.450  28.980  1.00  0.00           H
ATOM   2589  HB2 CYS A 462      91.710  42.720  29.340  1.00  0.00           H
ATOM   2590  SG  CYS A 462      90.230  44.030  30.460  1.00  0.00           S
ATOM   2591  HG  CYS A 462      90.220  45.370  30.370  1.00  0.00           H
ATOM   2592  C   CYS A 462      89.170  42.390  27.720  1.00  0.00           C
ATOM   2593  O   CYS A 462      88.030  42.900  27.680  1.00  0.00           O
ATOM   2594  N   ALA A 463      89.500  41.120  27.840  1.00  0.00           N
ATOM   2595  H   ALA A 463      90.460  40.820  27.830  1.00  0.00           H
ATOM   2596  CA  ALA A 463      88.410  40.140  28.100  1.00  0.00           C
ATOM   2597  HA  ALA A 463      87.620  40.680  28.620  1.00  0.00           H
ATOM   2598  CB  ALA A 463      87.820  39.660  26.770  1.00  0.00           C
ATOM   2599  HB1 ALA A 463      86.980  38.980  26.910  1.00  0.00           H
ATOM   2600  HB2 ALA A 463      87.670  40.470  26.050  1.00  0.00           H
ATOM   2601  HB3 ALA A 463      88.610  39.140  26.220  1.00  0.00           H
ATOM   2602  C   ALA A 463      88.860  39.090  29.140  1.00  0.00           C
ATOM   2603  O   ALA A 463      90.030  38.820  29.190  1.00  0.00           O
ATOM   2604  N   GLN A 464      87.960  38.460  29.830  1.00  0.00           N
ATOM   2605  H   GLN A 464      87.000  38.650  29.600  1.00  0.00           H
ATOM   2606  CA  GLN A 464      88.200  37.270  30.670  1.00  0.00           C
ATOM   2607  HA  GLN A 464      89.240  37.220  30.990  1.00  0.00           H
ATOM   2608  CB  GLN A 464      87.280  37.300  31.930  1.00  0.00           C
ATOM   2609  HB1 GLN A 464      87.370  36.400  32.530  1.00  0.00           H
ATOM   2610  HB2 GLN A 464      86.230  37.350  31.620  1.00  0.00           H
ATOM   2611  CG  GLN A 464      87.630  38.420  32.820  1.00  0.00           C
ATOM   2612  HG1 GLN A 464      87.810  39.370  32.310  1.00  0.00           H
ATOM   2613  HG2 GLN A 464      88.550  38.110  33.330  1.00  0.00           H
ATOM   2614  CD  GLN A 464      86.480  38.600  33.900  1.00  0.00           C
ATOM   2615  OE1 GLN A 464      85.420  39.200  33.560  1.00  0.00           O
ATOM   2616  NE2 GLN A 464      86.600  37.980  35.100  1.00  0.00           N
ATOM   2617 1HE2 GLN A 464      87.430  37.530  35.460  1.00  0.00           H
ATOM   2618 2HE2 GLN A 464      85.810  38.120  35.720  1.00  0.00           H
ATOM   2619  C   GLN A 464      87.930  35.980  29.820  1.00  0.00           C
ATOM   2620  O   GLN A 464      87.040  36.010  28.990  1.00  0.00           O
ATOM   2621  N   VAL A 465      88.610  34.870  30.080  1.00  0.00           N
ATOM   2622  H   VAL A 465      89.360  34.870  30.760  1.00  0.00           H
ATOM   2623  CA  VAL A 465      88.190  33.530  29.520  1.00  0.00           C
ATOM   2624  HA  VAL A 465      87.160  33.530  29.160  1.00  0.00           H
ATOM   2625  CB  VAL A 465      89.140  33.040  28.420  1.00  0.00           C
ATOM   2626  HB  VAL A 465      88.930  32.010  28.120  1.00  0.00           H
ATOM   2627  CG1 VAL A 465      88.780  33.870  27.200  1.00  0.00           C
ATOM   2628 1HG1 VAL A 465      88.840  34.960  27.260  1.00  0.00           H
ATOM   2629 2HG1 VAL A 465      89.360  33.510  26.340  1.00  0.00           H
ATOM   2630 3HG1 VAL A 465      87.810  33.510  26.870  1.00  0.00           H
ATOM   2631  CG2 VAL A 465      90.650  33.100  28.770  1.00  0.00           C
ATOM   2632 1HG2 VAL A 465      91.140  32.430  28.070  1.00  0.00           H
ATOM   2633 2HG2 VAL A 465      91.080  34.100  28.690  1.00  0.00           H
ATOM   2634 3HG2 VAL A 465      90.740  32.770  29.810  1.00  0.00           H
ATOM   2635  C   VAL A 465      88.070  32.420  30.530  1.00  0.00           C
ATOM   2636  O   VAL A 465      88.680  32.490  31.560  1.00  0.00           O
ATOM   2637  N   SER A 466      87.220  31.420  30.340  1.00  0.00           N
ATOM   2638  H   SER A 466      86.870  31.260  29.410  1.00  0.00           H
ATOM   2639  CA  SER A 466      86.810  30.520  31.380  1.00  0.00           C
ATOM   2640  HA  SER A 466      87.550  30.530  32.180  1.00  0.00           H
ATOM   2641  CB  SER A 466      85.510  31.010  31.960  1.00  0.00           C
ATOM   2642  HB1 SER A 466      85.570  32.070  32.200  1.00  0.00           H
ATOM   2643  HB2 SER A 466      85.330  30.410  32.860  1.00  0.00           H
ATOM   2644  OG  SER A 466      84.370  30.800  31.060  1.00  0.00           O
ATOM   2645  HG  SER A 466      83.870  31.610  30.940  1.00  0.00           H
ATOM   2646  C   SER A 466      86.640  29.120  30.920  1.00  0.00           C
ATOM   2647  O   SER A 466      86.530  28.930  29.720  1.00  0.00           O
ATOM   2648  N   LYS A 467      86.430  28.170  31.820  1.00  0.00           N
ATOM   2649  H   LYS A 467      86.420  28.350  32.810  1.00  0.00           H
ATOM   2650  CA  LYS A 467      85.980  26.820  31.350  1.00  0.00           C
ATOM   2651  HA  LYS A 467      86.740  26.440  30.660  1.00  0.00           H
ATOM   2652  CB  LYS A 467      85.780  25.830  32.540  1.00  0.00           C
ATOM   2653  HB1 LYS A 467      85.220  24.950  32.200  1.00  0.00           H
ATOM   2654  HB2 LYS A 467      85.080  26.280  33.250  1.00  0.00           H
ATOM   2655  CG  LYS A 467      87.010  25.330  33.310  1.00  0.00           C
ATOM   2656  HG1 LYS A 467      86.800  24.500  33.980  1.00  0.00           H
ATOM   2657  HG2 LYS A 467      87.310  26.160  33.960  1.00  0.00           H
ATOM   2658  CD  LYS A 467      88.130  24.980  32.330  1.00  0.00           C
ATOM   2659  HD1 LYS A 467      88.360  25.880  31.770  1.00  0.00           H
ATOM   2660  HD2 LYS A 467      87.890  24.220  31.590  1.00  0.00           H
ATOM   2661  CE  LYS A 467      89.400  24.640  33.180  1.00  0.00           C
ATOM   2662  HE1 LYS A 467      89.170  23.990  34.020  1.00  0.00           H
ATOM   2663  HE2 LYS A 467      89.740  25.560  33.650  1.00  0.00           H
ATOM   2664  NZ  LYS A 467      90.530  24.100  32.400  1.00  0.00           N
ATOM   2665  HZ1 LYS A 467      90.360  24.200  31.410  1.00  0.00           H
ATOM   2666  HZ2 LYS A 467      91.440  24.480  32.620  1.00  0.00           H
ATOM   2667  HZ3 LYS A 467      90.550  23.100  32.550  1.00  0.00           H
ATOM   2668  C   LYS A 467      84.680  26.830  30.480  1.00  0.00           C
ATOM   2669  O   LYS A 467      84.510  26.010  29.610  1.00  0.00           O
ATOM   2670  N   GLU A 468      83.750  27.820  30.630  1.00  0.00           N
ATOM   2671  H   GLU A 468      83.920  28.570  31.290  1.00  0.00           H
ATOM   2672  CA  GLU A 468      82.510  27.970  29.830  1.00  0.00           C
ATOM   2673  HA  GLU A 468      82.120  26.960  29.720  1.00  0.00           H
ATOM   2674  CB  GLU A 468      81.470  28.840  30.580  1.00  0.00           C
ATOM   2675  HB1 GLU A 468      81.910  29.830  30.560  1.00  0.00           H
ATOM   2676  HB2 GLU A 468      81.380  28.440  31.590  1.00  0.00           H
ATOM   2677  CG  GLU A 468      80.110  28.770  29.850  1.00  0.00           C
ATOM   2678  HG1 GLU A 468      79.770  27.730  29.890  1.00  0.00           H
ATOM   2679  HG2 GLU A 468      80.180  28.990  28.780  1.00  0.00           H
ATOM   2680  CD  GLU A 468      79.060  29.650  30.500  1.00  0.00           C
ATOM   2681  OE1 GLU A 468      79.450  30.710  31.060  1.00  0.00           O
ATOM   2682  OE2 GLU A 468      77.860  29.260  30.460  1.00  0.00           O
ATOM   2683  C   GLU A 468      82.860  28.610  28.430  1.00  0.00           C
ATOM   2684  O   GLU A 468      82.360  28.150  27.370  1.00  0.00           O
ATOM   2685  N   VAL A 469      83.820  29.610  28.420  1.00  0.00           N
ATOM   2686  H   VAL A 469      84.150  29.830  29.350  1.00  0.00           H
ATOM   2687  CA  VAL A 469      84.280  30.420  27.260  1.00  0.00           C
ATOM   2688  HA  VAL A 469      83.760  30.060  26.370  1.00  0.00           H
ATOM   2689  CB  VAL A 469      83.820  31.910  27.360  1.00  0.00           C
ATOM   2690  HB  VAL A 469      84.370  32.390  28.170  1.00  0.00           H
ATOM   2691  CG1 VAL A 469      84.100  32.690  26.040  1.00  0.00           C
ATOM   2692 1HG1 VAL A 469      83.680  32.200  25.160  1.00  0.00           H
ATOM   2693 2HG1 VAL A 469      83.750  33.720  26.100  1.00  0.00           H
ATOM   2694 3HG1 VAL A 469      85.170  32.700  25.850  1.00  0.00           H
ATOM   2695  CG2 VAL A 469      82.370  32.200  27.710  1.00  0.00           C
ATOM   2696 1HG2 VAL A 469      82.090  31.720  28.640  1.00  0.00           H
ATOM   2697 2HG2 VAL A 469      82.310  33.280  27.840  1.00  0.00           H
ATOM   2698 3HG2 VAL A 469      81.700  31.850  26.930  1.00  0.00           H
ATOM   2699  C   VAL A 469      85.820  30.380  27.140  1.00  0.00           C
ATOM   2700  O   VAL A 469      86.520  31.320  27.530  1.00  0.00           O
ATOM   2701  N   PRO A 470      86.450  29.210  26.750  1.00  0.00           N
ATOM   2702  CD  PRO A 470      85.780  27.870  26.640  1.00  0.00           C
ATOM   2703  HD1 PRO A 470      85.510  27.750  25.590  1.00  0.00           H
ATOM   2704  HD2 PRO A 470      84.900  27.770  27.270  1.00  0.00           H
ATOM   2705  CG  PRO A 470      86.830  26.840  27.030  1.00  0.00           C
ATOM   2706  HG1 PRO A 470      86.790  25.870  26.550  1.00  0.00           H
ATOM   2707  HG2 PRO A 470      86.960  26.740  28.110  1.00  0.00           H
ATOM   2708  CB  PRO A 470      88.050  27.520  26.490  1.00  0.00           C
ATOM   2709  HB1 PRO A 470      88.090  27.490  25.400  1.00  0.00           H
ATOM   2710  HB2 PRO A 470      88.950  27.050  26.870  1.00  0.00           H
ATOM   2711  CA  PRO A 470      87.890  29.000  26.910  1.00  0.00           C
ATOM   2712  HA  PRO A 470      88.200  29.120  27.940  1.00  0.00           H
ATOM   2713  C   PRO A 470      88.820  29.890  26.010  1.00  0.00           C
ATOM   2714  O   PRO A 470      90.060  30.020  26.230  1.00  0.00           O
ATOM   2715  N   ARG A 471      88.260  30.470  24.980  1.00  0.00           N
ATOM   2716  H   ARG A 471      87.250  30.520  24.930  1.00  0.00           H
ATOM   2717  CA  ARG A 471      88.970  31.250  23.970  1.00  0.00           C
ATOM   2718  HA  ARG A 471      89.830  31.670  24.490  1.00  0.00           H
ATOM   2719  CB  ARG A 471      89.390  30.440  22.760  1.00  0.00           C
ATOM   2720  HB1 ARG A 471      90.010  31.050  22.100  1.00  0.00           H
ATOM   2721  HB2 ARG A 471      88.530  30.180  22.130  1.00  0.00           H
ATOM   2722  CG  ARG A 471      90.230  29.080  23.030  1.00  0.00           C
ATOM   2723  HG1 ARG A 471      90.330  28.410  22.180  1.00  0.00           H
ATOM   2724  HG2 ARG A 471      89.770  28.580  23.880  1.00  0.00           H
ATOM   2725  CD  ARG A 471      91.600  29.390  23.480  1.00  0.00           C
ATOM   2726  HD1 ARG A 471      91.840  28.590  24.190  1.00  0.00           H
ATOM   2727  HD2 ARG A 471      91.650  30.380  23.930  1.00  0.00           H
ATOM   2728  NE  ARG A 471      92.690  29.340  22.410  1.00  0.00           N
ATOM   2729  HE  ARG A 471      92.420  28.930  21.520  1.00  0.00           H
ATOM   2730  CZ  ARG A 471      93.910  29.800  22.430  1.00  0.00           C
ATOM   2731  NH1 ARG A 471      94.420  30.340  23.500  1.00  0.00           N
ATOM   2732 1HH1 ARG A 471      93.980  30.260  24.410  1.00  0.00           H
ATOM   2733 2HH1 ARG A 471      95.240  30.920  23.370  1.00  0.00           H
ATOM   2734  NH2 ARG A 471      94.690  29.800  21.350  1.00  0.00           N
ATOM   2735 1HH2 ARG A 471      94.490  29.450  20.430  1.00  0.00           H
ATOM   2736 2HH2 ARG A 471      95.630  30.090  21.610  1.00  0.00           H
ATOM   2737  C   ARG A 471      88.010  32.350  23.540  1.00  0.00           C
ATOM   2738  O   ARG A 471      86.840  32.290  23.900  1.00  0.00           O
ATOM   2739  N   ARG A 472      88.440  33.320  22.730  1.00  0.00           N
ATOM   2740  H   ARG A 472      89.440  33.370  22.560  1.00  0.00           H
ATOM   2741  CA  ARG A 472      87.530  34.340  22.090  1.00  0.00           C
ATOM   2742  HA  ARG A 472      86.520  33.960  22.130  1.00  0.00           H
ATOM   2743  CB  ARG A 472      87.620  35.750  22.780  1.00  0.00           C
ATOM   2744  HB1 ARG A 472      87.210  36.600  22.250  1.00  0.00           H
ATOM   2745  HB2 ARG A 472      88.660  36.090  22.780  1.00  0.00           H
ATOM   2746  CG  ARG A 472      87.300  35.730  24.280  1.00  0.00           C
ATOM   2747  HG1 ARG A 472      87.910  36.560  24.650  1.00  0.00           H
ATOM   2748  HG2 ARG A 472      87.650  34.790  24.700  1.00  0.00           H
ATOM   2749  CD  ARG A 472      85.820  36.020  24.560  1.00  0.00           C
ATOM   2750  HD1 ARG A 472      85.290  35.160  24.140  1.00  0.00           H
ATOM   2751  HD2 ARG A 472      85.570  36.920  23.990  1.00  0.00           H
ATOM   2752  NE  ARG A 472      85.480  36.110  26.000  1.00  0.00           N
ATOM   2753  HE  ARG A 472      86.170  35.850  26.680  1.00  0.00           H
ATOM   2754  CZ  ARG A 472      84.300  36.410  26.530  1.00  0.00           C
ATOM   2755  NH1 ARG A 472      83.270  36.860  25.810  1.00  0.00           N
ATOM   2756 1HH1 ARG A 472      83.470  37.200  24.880  1.00  0.00           H
ATOM   2757 2HH1 ARG A 472      82.370  37.000  26.260  1.00  0.00           H
ATOM   2758  NH2 ARG A 472      84.140  36.490  27.840  1.00  0.00           N
ATOM   2759 1HH2 ARG A 472      84.810  35.980  28.400  1.00  0.00           H
ATOM   2760 2HH2 ARG A 472      83.270  36.740  28.280  1.00  0.00           H
ATOM   2761  C   ARG A 472      87.850  34.480  20.570  1.00  0.00           C
ATOM   2762  O   ARG A 472      88.850  34.030  20.080  1.00  0.00           O
ATOM   2763  N   LYS A 473      86.900  35.070  19.800  1.00  0.00           N
ATOM   2764  H   LYS A 473      86.010  35.280  20.220  1.00  0.00           H
ATOM   2765  CA  LYS A 473      86.930  35.210  18.320  1.00  0.00           C
ATOM   2766  HA  LYS A 473      87.840  34.900  17.800  1.00  0.00           H
ATOM   2767  CB  LYS A 473      86.000  34.150  17.710  1.00  0.00           C
ATOM   2768  HB1 LYS A 473      85.830  34.320  16.640  1.00  0.00           H
ATOM   2769  HB2 LYS A 473      84.980  34.190  18.090  1.00  0.00           H
ATOM   2770  CG  LYS A 473      86.440  32.680  17.880  1.00  0.00           C
ATOM   2771  HG1 LYS A 473      86.290  32.280  18.880  1.00  0.00           H
ATOM   2772  HG2 LYS A 473      87.490  32.540  17.620  1.00  0.00           H
ATOM   2773  CD  LYS A 473      85.680  31.800  16.900  1.00  0.00           C
ATOM   2774  HD1 LYS A 473      85.950  30.800  17.240  1.00  0.00           H
ATOM   2775  HD2 LYS A 473      86.070  31.890  15.880  1.00  0.00           H
ATOM   2776  CE  LYS A 473      84.120  32.000  16.840  1.00  0.00           C
ATOM   2777  HE1 LYS A 473      84.000  32.830  16.140  1.00  0.00           H
ATOM   2778  HE2 LYS A 473      83.760  32.350  17.800  1.00  0.00           H
ATOM   2779  NZ  LYS A 473      83.460  30.760  16.310  1.00  0.00           N
ATOM   2780  HZ1 LYS A 473      83.700  29.870  16.740  1.00  0.00           H
ATOM   2781  HZ2 LYS A 473      82.450  30.840  16.300  1.00  0.00           H
ATOM   2782  HZ3 LYS A 473      83.750  30.710  15.350  1.00  0.00           H
ATOM   2783  C   LYS A 473      86.700  36.600  17.790  1.00  0.00           C
ATOM   2784  O   LYS A 473      86.640  36.690  16.570  1.00  0.00           O
ATOM   2785  N   SER A 474      86.500  37.600  18.610  1.00  0.00           N
ATOM   2786  H   SER A 474      86.470  37.450  19.610  1.00  0.00           H
ATOM   2787  CA  SER A 474      86.140  39.010  18.180  1.00  0.00           C
ATOM   2788  HA  SER A 474      85.630  39.000  17.220  1.00  0.00           H
ATOM   2789  CB  SER A 474      85.370  39.700  19.390  1.00  0.00           C
ATOM   2790  HB1 SER A 474      84.630  39.010  19.790  1.00  0.00           H
ATOM   2791  HB2 SER A 474      84.860  40.570  18.950  1.00  0.00           H
ATOM   2792  OG  SER A 474      86.190  40.020  20.460  1.00  0.00           O
ATOM   2793  HG  SER A 474      85.700  40.520  21.130  1.00  0.00           H
ATOM   2794  C   SER A 474      87.410  39.790  17.870  1.00  0.00           C
ATOM   2795  O   SER A 474      88.540  39.600  18.300  1.00  0.00           O
ATOM   2796  N   LEU A 475      87.220  40.730  16.950  1.00  0.00           N
ATOM   2797  H   LEU A 475      86.250  40.840  16.680  1.00  0.00           H
ATOM   2798  CA  LEU A 475      88.210  41.540  16.240  1.00  0.00           C
ATOM   2799  HA  LEU A 475      89.140  41.050  16.530  1.00  0.00           H
ATOM   2800  CB  LEU A 475      88.080  41.490  14.720  1.00  0.00           C
ATOM   2801  HB1 LEU A 475      87.030  41.490  14.410  1.00  0.00           H
ATOM   2802  HB2 LEU A 475      88.460  40.520  14.400  1.00  0.00           H
ATOM   2803  CG  LEU A 475      88.930  42.500  14.040  1.00  0.00           C
ATOM   2804  HG  LEU A 475      88.510  43.460  14.350  1.00  0.00           H
ATOM   2805  CD1 LEU A 475      90.400  42.310  14.190  1.00  0.00           C
ATOM   2806 1HD1 LEU A 475      90.710  41.320  13.860  1.00  0.00           H
ATOM   2807 2HD1 LEU A 475      90.910  43.100  13.620  1.00  0.00           H
ATOM   2808 3HD1 LEU A 475      90.560  42.460  15.250  1.00  0.00           H
ATOM   2809  CD2 LEU A 475      88.740  42.280  12.510  1.00  0.00           C
ATOM   2810 1HD2 LEU A 475      89.580  42.730  11.990  1.00  0.00           H
ATOM   2811 2HD2 LEU A 475      88.920  41.240  12.210  1.00  0.00           H
ATOM   2812 3HD2 LEU A 475      87.770  42.630  12.160  1.00  0.00           H
ATOM   2813  C   LEU A 475      88.140  42.910  16.990  1.00  0.00           C
ATOM   2814  O   LEU A 475      87.170  43.630  16.820  1.00  0.00           O
ATOM   2815  N   VAL A 476      89.130  43.130  17.850  1.00  0.00           N
ATOM   2816  H   VAL A 476      89.740  42.350  18.040  1.00  0.00           H
ATOM   2817  CA  VAL A 476      89.030  44.140  18.970  1.00  0.00           C
ATOM   2818  HA  VAL A 476      88.620  45.100  18.670  1.00  0.00           H
ATOM   2819  CB  VAL A 476      88.180  43.650  20.150  1.00  0.00           C
ATOM   2820  HB  VAL A 476      88.490  42.660  20.480  1.00  0.00           H
ATOM   2821  CG1 VAL A 476      88.300  44.550  21.360  1.00  0.00           C
ATOM   2822 1HG1 VAL A 476      87.620  44.260  22.170  1.00  0.00           H
ATOM   2823 2HG1 VAL A 476      89.340  44.510  21.690  1.00  0.00           H
ATOM   2824 3HG1 VAL A 476      88.070  45.610  21.200  1.00  0.00           H
ATOM   2825  CG2 VAL A 476      86.720  43.360  19.830  1.00  0.00           C
ATOM   2826 1HG2 VAL A 476      86.230  42.980  20.730  1.00  0.00           H
ATOM   2827 2HG2 VAL A 476      86.310  44.270  19.400  1.00  0.00           H
ATOM   2828 3HG2 VAL A 476      86.660  42.560  19.100  1.00  0.00           H
ATOM   2829  C   VAL A 476      90.530  44.440  19.500  1.00  0.00           C
ATOM   2830  O   VAL A 476      91.270  43.490  19.770  1.00  0.00           O
ATOM   2831  N   GLY A 477      90.920  45.700  19.650  1.00  0.00           N
ATOM   2832  H   GLY A 477      90.280  46.480  19.570  1.00  0.00           H
ATOM   2833  CA  GLY A 477      92.340  46.070  19.870  1.00  0.00           C
ATOM   2834  HA1 GLY A 477      92.920  45.160  19.820  1.00  0.00           H
ATOM   2835  HA2 GLY A 477      92.410  46.700  20.760  1.00  0.00           H
ATOM   2836  C   GLY A 477      92.860  47.050  18.750  1.00  0.00           C
ATOM   2837  O   GLY A 477      92.050  47.550  17.940  1.00  0.00           O
ATOM   2838  N   THR A 478      94.140  47.480  18.720  1.00  0.00           N
ATOM   2839  H   THR A 478      94.660  47.280  19.560  1.00  0.00           H
ATOM   2840  CA  THR A 478      94.610  48.520  17.810  1.00  0.00           C
ATOM   2841  HA  THR A 478      93.780  49.170  17.540  1.00  0.00           H
ATOM   2842  CB  THR A 478      95.570  49.380  18.490  1.00  0.00           C
ATOM   2843  HB  THR A 478      96.510  48.910  18.770  1.00  0.00           H
ATOM   2844  CG2 THR A 478      96.110  50.500  17.630  1.00  0.00           C
ATOM   2845 1HG2 THR A 478      96.760  51.210  18.130  1.00  0.00           H
ATOM   2846 2HG2 THR A 478      96.690  50.170  16.770  1.00  0.00           H
ATOM   2847 3HG2 THR A 478      95.280  51.090  17.250  1.00  0.00           H
ATOM   2848  OG1 THR A 478      94.940  50.000  19.570  1.00  0.00           O
ATOM   2849  HG1 THR A 478      94.580  49.330  20.150  1.00  0.00           H
ATOM   2850  C   THR A 478      95.270  47.860  16.630  1.00  0.00           C
ATOM   2851  O   THR A 478      96.340  47.250  16.780  1.00  0.00           O
ATOM   2852  N   PRO A 479      94.720  48.040  15.380  1.00  0.00           N
ATOM   2853  CD  PRO A 479      93.430  48.680  15.010  1.00  0.00           C
ATOM   2854  HD1 PRO A 479      93.500  49.760  15.110  1.00  0.00           H
ATOM   2855  HD2 PRO A 479      92.690  48.250  15.680  1.00  0.00           H
ATOM   2856  CG  PRO A 479      93.100  48.230  13.620  1.00  0.00           C
ATOM   2857  HG1 PRO A 479      92.420  48.920  13.110  1.00  0.00           H
ATOM   2858  HG2 PRO A 479      92.610  47.260  13.700  1.00  0.00           H
ATOM   2859  CB  PRO A 479      94.500  48.040  13.000  1.00  0.00           C
ATOM   2860  HB1 PRO A 479      95.060  48.960  12.850  1.00  0.00           H
ATOM   2861  HB2 PRO A 479      94.420  47.290  12.220  1.00  0.00           H
ATOM   2862  CA  PRO A 479      95.030  47.250  14.220  1.00  0.00           C
ATOM   2863  HA  PRO A 479      94.490  46.320  14.370  1.00  0.00           H
ATOM   2864  C   PRO A 479      96.490  46.900  14.020  1.00  0.00           C
ATOM   2865  O   PRO A 479      96.860  45.740  13.980  1.00  0.00           O
ATOM   2866  N   TYR A 480      97.410  47.860  14.160  1.00  0.00           N
ATOM   2867  H   TYR A 480      97.060  48.800  14.260  1.00  0.00           H
ATOM   2868  CA  TYR A 480      98.880  47.550  13.950  1.00  0.00           C
ATOM   2869  HA  TYR A 480      98.950  47.030  12.990  1.00  0.00           H
ATOM   2870  CB  TYR A 480      99.640  48.850  13.840  1.00  0.00           C
ATOM   2871  HB1 TYR A 480     100.700  48.680  13.650  1.00  0.00           H
ATOM   2872  HB2 TYR A 480      99.550  49.260  14.850  1.00  0.00           H
ATOM   2873  CG  TYR A 480      99.130  49.870  12.860  1.00  0.00           C
ATOM   2874  CD1 TYR A 480      99.290  49.680  11.490  1.00  0.00           C
ATOM   2875  HD1 TYR A 480      99.680  48.770  11.050  1.00  0.00           H
ATOM   2876  CE1 TYR A 480      98.680  50.590  10.650  1.00  0.00           C
ATOM   2877  HE1 TYR A 480      98.640  50.390   9.590  1.00  0.00           H
ATOM   2878  CZ  TYR A 480      98.020  51.690  11.130  1.00  0.00           C
ATOM   2879  OH  TYR A 480      97.370  52.420  10.210  1.00  0.00           O
ATOM   2880  HH  TYR A 480      97.350  52.080   9.310  1.00  0.00           H
ATOM   2881  CE2 TYR A 480      97.930  51.960  12.490  1.00  0.00           C
ATOM   2882  HE2 TYR A 480      97.340  52.820  12.770  1.00  0.00           H
ATOM   2883  CD2 TYR A 480      98.480  51.000  13.340  1.00  0.00           C
ATOM   2884  HD2 TYR A 480      98.300  51.150  14.390  1.00  0.00           H
ATOM   2885  C   TYR A 480      99.620  46.580  14.850  1.00  0.00           C
ATOM   2886  O   TYR A 480     100.620  45.890  14.590  1.00  0.00           O
ATOM   2887  N   TRP A 481      99.040  46.500  16.030  1.00  0.00           N
ATOM   2888  H   TRP A 481      98.180  46.980  16.240  1.00  0.00           H
ATOM   2889  CA  TRP A 481      99.550  45.570  17.070  1.00  0.00           C
ATOM   2890  HA  TRP A 481     100.580  45.250  16.860  1.00  0.00           H
ATOM   2891  CB  TRP A 481      99.610  46.330  18.420  1.00  0.00           C
ATOM   2892  HB1 TRP A 481      99.900  45.600  19.180  1.00  0.00           H
ATOM   2893  HB2 TRP A 481      98.650  46.790  18.650  1.00  0.00           H
ATOM   2894  CG  TRP A 481     100.600  47.470  18.530  1.00  0.00           C
ATOM   2895  CD1 TRP A 481     101.830  47.380  19.000  1.00  0.00           C
ATOM   2896  HD1 TRP A 481     102.270  46.460  19.350  1.00  0.00           H
ATOM   2897  NE1 TRP A 481     102.600  48.520  18.670  1.00  0.00           N
ATOM   2898  HE1 TRP A 481     103.430  48.770  19.180  1.00  0.00           H
ATOM   2899  CE2 TRP A 481     101.760  49.550  18.190  1.00  0.00           C
ATOM   2900  CZ2 TRP A 481     101.940  50.900  17.940  1.00  0.00           C
ATOM   2901  HZ2 TRP A 481     102.850  51.460  18.110  1.00  0.00           H
ATOM   2902  CH2 TRP A 481     100.900  51.610  17.290  1.00  0.00           C
ATOM   2903  HH2 TRP A 481     101.040  52.660  17.110  1.00  0.00           H
ATOM   2904  CZ3 TRP A 481      99.680  50.960  17.040  1.00  0.00           C
ATOM   2905  HZ3 TRP A 481      98.890  51.540  16.580  1.00  0.00           H
ATOM   2906  CE3 TRP A 481      99.500  49.620  17.410  1.00  0.00           C
ATOM   2907  HE3 TRP A 481      98.530  49.170  17.270  1.00  0.00           H
ATOM   2908  CD2 TRP A 481     100.590  48.830  17.960  1.00  0.00           C
ATOM   2909  C   TRP A 481      98.740  44.300  17.240  1.00  0.00           C
ATOM   2910  O   TRP A 481      99.160  43.420  18.030  1.00  0.00           O
ATOM   2911  N   MET A 482      97.640  44.070  16.470  1.00  0.00           N
ATOM   2912  H   MET A 482      97.390  44.760  15.780  1.00  0.00           H
ATOM   2913  CA  MET A 482      96.790  42.850  16.510  1.00  0.00           C
ATOM   2914  HA  MET A 482      96.480  42.660  17.540  1.00  0.00           H
ATOM   2915  CB  MET A 482      95.600  42.930  15.600  1.00  0.00           C
ATOM   2916  HB1 MET A 482      95.030  42.000  15.720  1.00  0.00           H
ATOM   2917  HB2 MET A 482      95.760  43.000  14.520  1.00  0.00           H
ATOM   2918  CG  MET A 482      94.620  44.030  15.900  1.00  0.00           C
ATOM   2919  HG1 MET A 482      95.110  44.990  15.760  1.00  0.00           H
ATOM   2920  HG2 MET A 482      94.270  43.890  16.930  1.00  0.00           H
ATOM   2921  SD  MET A 482      93.090  43.860  14.900  1.00  0.00           S
ATOM   2922  CE  MET A 482      92.080  44.870  16.010  1.00  0.00           C
ATOM   2923  HE1 MET A 482      92.090  44.430  17.010  1.00  0.00           H
ATOM   2924  HE2 MET A 482      92.490  45.880  15.940  1.00  0.00           H
ATOM   2925  HE3 MET A 482      91.040  44.920  15.680  1.00  0.00           H
ATOM   2926  C   MET A 482      97.670  41.600  16.130  1.00  0.00           C
ATOM   2927  O   MET A 482      98.410  41.590  15.190  1.00  0.00           O
ATOM   2928  N   ALA A 483      97.450  40.540  16.910  1.00  0.00           N
ATOM   2929  H   ALA A 483      96.900  40.610  17.750  1.00  0.00           H
ATOM   2930  CA  ALA A 483      98.010  39.200  16.660  1.00  0.00           C
ATOM   2931  HA  ALA A 483      99.080  39.340  16.490  1.00  0.00           H
ATOM   2932  CB  ALA A 483      97.940  38.360  17.890  1.00  0.00           C
ATOM   2933  HB1 ALA A 483      96.880  38.110  17.940  1.00  0.00           H
ATOM   2934  HB2 ALA A 483      98.450  37.410  17.700  1.00  0.00           H
ATOM   2935  HB3 ALA A 483      98.330  38.890  18.750  1.00  0.00           H
ATOM   2936  C   ALA A 483      97.250  38.530  15.460  1.00  0.00           C
ATOM   2937  O   ALA A 483      96.020  38.690  15.370  1.00  0.00           O
ATOM   2938  N   PRO A 484      97.920  37.710  14.640  1.00  0.00           N
ATOM   2939  CD  PRO A 484      99.360  37.530  14.570  1.00  0.00           C
ATOM   2940  HD1 PRO A 484      99.680  36.930  15.420  1.00  0.00           H
ATOM   2941  HD2 PRO A 484      99.850  38.500  14.540  1.00  0.00           H
ATOM   2942  CG  PRO A 484      99.760  36.710  13.330  1.00  0.00           C
ATOM   2943  HG1 PRO A 484      99.910  35.680  13.630  1.00  0.00           H
ATOM   2944  HG2 PRO A 484     100.660  37.160  12.920  1.00  0.00           H
ATOM   2945  CB  PRO A 484      98.490  36.760  12.420  1.00  0.00           C
ATOM   2946  HB1 PRO A 484      98.080  35.810  12.070  1.00  0.00           H
ATOM   2947  HB2 PRO A 484      98.590  37.380  11.530  1.00  0.00           H
ATOM   2948  CA  PRO A 484      97.370  37.260  13.350  1.00  0.00           C
ATOM   2949  HA  PRO A 484      96.990  38.180  12.900  1.00  0.00           H
ATOM   2950  C   PRO A 484      96.250  36.280  13.490  1.00  0.00           C
ATOM   2951  O   PRO A 484      95.400  36.240  12.630  1.00  0.00           O
ATOM   2952  N   GLU A 485      96.170  35.530  14.590  1.00  0.00           N
ATOM   2953  H   GLU A 485      96.930  35.550  15.250  1.00  0.00           H
ATOM   2954  CA  GLU A 485      95.020  34.650  14.870  1.00  0.00           C
ATOM   2955  HA  GLU A 485      94.800  34.020  14.000  1.00  0.00           H
ATOM   2956  CB  GLU A 485      95.220  33.650  16.080  1.00  0.00           C
ATOM   2957  HB1 GLU A 485      96.030  32.950  15.860  1.00  0.00           H
ATOM   2958  HB2 GLU A 485      94.300  33.090  16.210  1.00  0.00           H
ATOM   2959  CG  GLU A 485      95.620  34.340  17.390  1.00  0.00           C
ATOM   2960  HG1 GLU A 485      95.250  33.670  18.170  1.00  0.00           H
ATOM   2961  HG2 GLU A 485      94.960  35.180  17.620  1.00  0.00           H
ATOM   2962  CD  GLU A 485      97.090  34.570  17.750  1.00  0.00           C
ATOM   2963  OE1 GLU A 485      97.980  34.690  16.870  1.00  0.00           O
ATOM   2964  OE2 GLU A 485      97.410  34.500  18.930  1.00  0.00           O
ATOM   2965  C   GLU A 485      93.720  35.470  15.080  1.00  0.00           C
ATOM   2966  O   GLU A 485      92.570  34.970  14.950  1.00  0.00           O
ATOM   2967  N   LEU A 486      93.850  36.690  15.620  1.00  0.00           N
ATOM   2968  H   LEU A 486      94.740  37.050  15.910  1.00  0.00           H
ATOM   2969  CA  LEU A 486      92.740  37.530  16.020  1.00  0.00           C
ATOM   2970  HA  LEU A 486      91.950  36.920  16.460  1.00  0.00           H
ATOM   2971  CB  LEU A 486      93.180  38.350  17.280  1.00  0.00           C
ATOM   2972  HB1 LEU A 486      94.090  38.880  17.000  1.00  0.00           H
ATOM   2973  HB2 LEU A 486      93.510  37.690  18.080  1.00  0.00           H
ATOM   2974  CG  LEU A 486      92.320  39.500  17.860  1.00  0.00           C
ATOM   2975  HG  LEU A 486      91.350  39.150  18.220  1.00  0.00           H
ATOM   2976  CD1 LEU A 486      93.240  40.160  18.950  1.00  0.00           C
ATOM   2977 1HD1 LEU A 486      92.600  40.840  19.510  1.00  0.00           H
ATOM   2978 2HD1 LEU A 486      93.650  39.440  19.660  1.00  0.00           H
ATOM   2979 3HD1 LEU A 486      93.970  40.830  18.500  1.00  0.00           H
ATOM   2980  CD2 LEU A 486      92.070  40.610  16.880  1.00  0.00           C
ATOM   2981 1HD2 LEU A 486      91.690  41.430  17.490  1.00  0.00           H
ATOM   2982 2HD2 LEU A 486      93.030  40.870  16.440  1.00  0.00           H
ATOM   2983 3HD2 LEU A 486      91.300  40.400  16.130  1.00  0.00           H
ATOM   2984  C   LEU A 486      92.110  38.310  14.840  1.00  0.00           C
ATOM   2985  O   LEU A 486      90.930  38.430  14.480  1.00  0.00           O
ATOM   2986  N   ILE A 487      93.010  38.760  13.910  1.00  0.00           N
ATOM   2987  H   ILE A 487      93.980  38.540  14.100  1.00  0.00           H
ATOM   2988  CA  ILE A 487      92.640  39.260  12.550  1.00  0.00           C
ATOM   2989  HA  ILE A 487      92.120  40.220  12.550  1.00  0.00           H
ATOM   2990  CB  ILE A 487      93.980  39.630  11.820  1.00  0.00           C
ATOM   2991  HB  ILE A 487      94.670  38.780  11.820  1.00  0.00           H
ATOM   2992  CG2 ILE A 487      93.680  40.180  10.340  1.00  0.00           C
ATOM   2993 1HG2 ILE A 487      94.670  40.490   9.980  1.00  0.00           H
ATOM   2994 2HG2 ILE A 487      93.240  39.380   9.740  1.00  0.00           H
ATOM   2995 3HG2 ILE A 487      92.950  40.990  10.320  1.00  0.00           H
ATOM   2996  CG1 ILE A 487      94.740  40.690  12.620  1.00  0.00           C
ATOM   2997 1HG1 ILE A 487      95.030  40.310  13.600  1.00  0.00           H
ATOM   2998 2HG1 ILE A 487      94.000  41.460  12.840  1.00  0.00           H
ATOM   2999  CD  ILE A 487      96.080  41.200  12.020  1.00  0.00           C
ATOM   3000  HD1 ILE A 487      96.790  40.380  11.950  1.00  0.00           H
ATOM   3001  HD2 ILE A 487      96.040  41.640  11.020  1.00  0.00           H
ATOM   3002  HD3 ILE A 487      96.610  41.700  12.820  1.00  0.00           H
ATOM   3003  C   ILE A 487      91.890  38.170  11.710  1.00  0.00           C
ATOM   3004  O   ILE A 487      90.810  38.400  11.150  1.00  0.00           O
ATOM   3005  N   SER A 488      92.370  36.950  11.790  1.00  0.00           N
ATOM   3006  H   SER A 488      93.260  36.820  12.250  1.00  0.00           H
ATOM   3007  CA  SER A 488      91.840  35.750  11.120  1.00  0.00           C
ATOM   3008  HA  SER A 488      91.650  35.930  10.060  1.00  0.00           H
ATOM   3009  CB  SER A 488      92.900  34.650  11.160  1.00  0.00           C
ATOM   3010  HB1 SER A 488      92.390  33.790  10.720  1.00  0.00           H
ATOM   3011  HB2 SER A 488      93.100  34.250  12.160  1.00  0.00           H
ATOM   3012  OG  SER A 488      94.080  34.940  10.550  1.00  0.00           O
ATOM   3013  HG  SER A 488      94.490  35.520  11.190  1.00  0.00           H
ATOM   3014  C   SER A 488      90.490  35.220  11.750  1.00  0.00           C
ATOM   3015  O   SER A 488      89.820  34.500  11.070  1.00  0.00           O
ATOM   3016  N   ARG A 489      90.130  35.620  12.980  1.00  0.00           N
ATOM   3017  H   ARG A 489      90.770  36.260  13.420  1.00  0.00           H
ATOM   3018  CA  ARG A 489      89.030  35.150  13.830  1.00  0.00           C
ATOM   3019  HA  ARG A 489      89.330  35.540  14.800  1.00  0.00           H
ATOM   3020  CB  ARG A 489      87.810  35.990  13.450  1.00  0.00           C
ATOM   3021  HB1 ARG A 489      87.060  35.520  14.090  1.00  0.00           H
ATOM   3022  HB2 ARG A 489      87.640  35.860  12.380  1.00  0.00           H
ATOM   3023  CG  ARG A 489      87.930  37.490  13.760  1.00  0.00           C
ATOM   3024  HG1 ARG A 489      88.790  37.910  13.240  1.00  0.00           H
ATOM   3025  HG2 ARG A 489      88.120  37.740  14.800  1.00  0.00           H
ATOM   3026  CD  ARG A 489      86.660  38.160  13.360  1.00  0.00           C
ATOM   3027  HD1 ARG A 489      86.340  37.820  12.370  1.00  0.00           H
ATOM   3028  HD2 ARG A 489      86.760  39.240  13.360  1.00  0.00           H
ATOM   3029  NE  ARG A 489      85.540  37.910  14.300  1.00  0.00           N
ATOM   3030  HE  ARG A 489      85.840  37.430  15.140  1.00  0.00           H
ATOM   3031  CZ  ARG A 489      84.240  38.050  14.140  1.00  0.00           C
ATOM   3032  NH1 ARG A 489      83.300  37.590  14.900  1.00  0.00           N
ATOM   3033 1HH1 ARG A 489      83.520  36.970  15.660  1.00  0.00           H
ATOM   3034 2HH1 ARG A 489      82.340  37.840  14.700  1.00  0.00           H
ATOM   3035  NH2 ARG A 489      83.750  38.610  13.080  1.00  0.00           N
ATOM   3036 1HH2 ARG A 489      84.330  39.190  12.500  1.00  0.00           H
ATOM   3037 2HH2 ARG A 489      82.780  38.530  12.810  1.00  0.00           H
ATOM   3038  C   ARG A 489      89.010  33.650  14.160  1.00  0.00           C
ATOM   3039  O   ARG A 489      88.060  32.990  13.910  1.00  0.00           O
ATOM   3040  N   LEU A 490      90.190  33.190  14.650  1.00  0.00           N
ATOM   3041  H   LEU A 490      90.920  33.850  14.860  1.00  0.00           H
ATOM   3042  CA  LEU A 490      90.460  31.810  15.230  1.00  0.00           C
ATOM   3043  HA  LEU A 490      89.830  31.080  14.710  1.00  0.00           H
ATOM   3044  CB  LEU A 490      91.870  31.300  14.850  1.00  0.00           C
ATOM   3045  HB1 LEU A 490      92.030  30.320  15.310  1.00  0.00           H
ATOM   3046  HB2 LEU A 490      92.550  31.980  15.350  1.00  0.00           H
ATOM   3047  CG  LEU A 490      92.270  31.210  13.370  1.00  0.00           C
ATOM   3048  HG  LEU A 490      92.150  32.170  12.870  1.00  0.00           H
ATOM   3049  CD1 LEU A 490      93.720  30.820  13.240  1.00  0.00           C
ATOM   3050 1HD1 LEU A 490      93.840  29.810  13.620  1.00  0.00           H
ATOM   3051 2HD1 LEU A 490      93.990  30.760  12.190  1.00  0.00           H
ATOM   3052 3HD1 LEU A 490      94.330  31.560  13.750  1.00  0.00           H
ATOM   3053  CD2 LEU A 490      91.450  30.300  12.500  1.00  0.00           C
ATOM   3054 1HD2 LEU A 490      91.440  29.310  12.960  1.00  0.00           H
ATOM   3055 2HD2 LEU A 490      90.510  30.800  12.280  1.00  0.00           H
ATOM   3056 3HD2 LEU A 490      91.900  30.120  11.530  1.00  0.00           H
ATOM   3057  C   LEU A 490      90.210  31.830  16.810  1.00  0.00           C
ATOM   3058  O   LEU A 490      90.210  32.890  17.460  1.00  0.00           O
ATOM   3059  N   PRO A 491      90.010  30.710  17.470  1.00  0.00           N
ATOM   3060  CD  PRO A 491      89.740  29.410  16.900  1.00  0.00           C
ATOM   3061  HD1 PRO A 491      90.690  28.870  16.930  1.00  0.00           H
ATOM   3062  HD2 PRO A 491      89.290  29.400  15.910  1.00  0.00           H
ATOM   3063  CG  PRO A 491      88.830  28.660  17.920  1.00  0.00           C
ATOM   3064  HG1 PRO A 491      88.950  27.590  17.790  1.00  0.00           H
ATOM   3065  HG2 PRO A 491      87.790  28.960  17.810  1.00  0.00           H
ATOM   3066  CB  PRO A 491      89.320  29.160  19.280  1.00  0.00           C
ATOM   3067  HB1 PRO A 491      90.150  28.510  19.530  1.00  0.00           H
ATOM   3068  HB2 PRO A 491      88.540  29.190  20.040  1.00  0.00           H
ATOM   3069  CA  PRO A 491      89.770  30.590  18.880  1.00  0.00           C
ATOM   3070  HA  PRO A 491      89.050  31.350  19.180  1.00  0.00           H
ATOM   3071  C   PRO A 491      91.110  30.890  19.620  1.00  0.00           C
ATOM   3072  O   PRO A 491      92.050  30.070  19.610  1.00  0.00           O
ATOM   3073  N   TYR A 492      91.190  32.150  20.170  1.00  0.00           N
ATOM   3074  H   TYR A 492      90.350  32.690  20.010  1.00  0.00           H
ATOM   3075  CA  TYR A 492      92.460  32.780  20.640  1.00  0.00           C
ATOM   3076  HA  TYR A 492      93.260  32.080  20.410  1.00  0.00           H
ATOM   3077  CB  TYR A 492      92.710  34.010  19.770  1.00  0.00           C
ATOM   3078  HB1 TYR A 492      92.680  33.710  18.720  1.00  0.00           H
ATOM   3079  HB2 TYR A 492      93.750  34.340  19.840  1.00  0.00           H
ATOM   3080  CG  TYR A 492      91.810  35.230  19.950  1.00  0.00           C
ATOM   3081  CD1 TYR A 492      91.810  35.870  21.250  1.00  0.00           C
ATOM   3082  HD1 TYR A 492      92.380  35.540  22.110  1.00  0.00           H
ATOM   3083  CE1 TYR A 492      90.990  36.980  21.490  1.00  0.00           C
ATOM   3084  HE1 TYR A 492      90.900  37.410  22.470  1.00  0.00           H
ATOM   3085  CZ  TYR A 492      90.190  37.520  20.420  1.00  0.00           C
ATOM   3086  OH  TYR A 492      89.460  38.650  20.600  1.00  0.00           O
ATOM   3087  HH  TYR A 492      88.990  38.950  19.820  1.00  0.00           H
ATOM   3088  CE2 TYR A 492      90.350  36.990  19.150  1.00  0.00           C
ATOM   3089  HE2 TYR A 492      89.810  37.470  18.350  1.00  0.00           H
ATOM   3090  CD2 TYR A 492      91.100  35.810  18.860  1.00  0.00           C
ATOM   3091  HD2 TYR A 492      91.160  35.360  17.880  1.00  0.00           H
ATOM   3092  C   TYR A 492      92.460  33.010  22.150  1.00  0.00           C
ATOM   3093  O   TYR A 492      91.410  33.110  22.760  1.00  0.00           O
ATOM   3094  N   GLY A 493      93.580  33.290  22.860  1.00  0.00           N
ATOM   3095  H   GLY A 493      94.410  33.490  22.310  1.00  0.00           H
ATOM   3096  CA  GLY A 493      93.650  33.710  24.230  1.00  0.00           C
ATOM   3097  HA1 GLY A 493      93.860  32.760  24.720  1.00  0.00           H
ATOM   3098  HA2 GLY A 493      92.680  34.010  24.620  1.00  0.00           H
ATOM   3099  C   GLY A 493      94.900  34.590  24.520  1.00  0.00           C
ATOM   3100  O   GLY A 493      95.270  35.380  23.720  1.00  0.00           O
ATOM   3101  N   PRO A 494      95.390  34.580  25.760  1.00  0.00           N
ATOM   3102  CD  PRO A 494      94.950  33.700  26.850  1.00  0.00           C
ATOM   3103  HD1 PRO A 494      94.970  32.630  26.620  1.00  0.00           H
ATOM   3104  HD2 PRO A 494      93.960  34.000  27.190  1.00  0.00           H
ATOM   3105  CG  PRO A 494      95.970  33.870  27.970  1.00  0.00           C
ATOM   3106  HG1 PRO A 494      96.710  33.080  27.850  1.00  0.00           H
ATOM   3107  HG2 PRO A 494      95.410  33.820  28.900  1.00  0.00           H
ATOM   3108  CB  PRO A 494      96.440  35.320  27.790  1.00  0.00           C
ATOM   3109  HB1 PRO A 494      97.450  35.560  28.120  1.00  0.00           H
ATOM   3110  HB2 PRO A 494      95.760  36.090  28.160  1.00  0.00           H
ATOM   3111  CA  PRO A 494      96.420  35.510  26.270  1.00  0.00           C
ATOM   3112  HA  PRO A 494      96.000  36.500  26.090  1.00  0.00           H
ATOM   3113  C   PRO A 494      97.750  35.460  25.510  1.00  0.00           C
ATOM   3114  O   PRO A 494      98.660  36.170  25.870  1.00  0.00           O
ATOM   3115  N   GLU A 495      97.960  34.650  24.390  1.00  0.00           N
ATOM   3116  H   GLU A 495      97.240  33.970  24.170  1.00  0.00           H
ATOM   3117  CA  GLU A 495      99.180  34.710  23.610  1.00  0.00           C
ATOM   3118  HA  GLU A 495     100.050  34.690  24.270  1.00  0.00           H
ATOM   3119  CB  GLU A 495      99.260  33.530  22.660  1.00  0.00           C
ATOM   3120  HB1 GLU A 495     100.250  33.600  22.220  1.00  0.00           H
ATOM   3121  HB2 GLU A 495      98.480  33.780  21.940  1.00  0.00           H
ATOM   3122  CG  GLU A 495      98.900  32.170  23.230  1.00  0.00           C
ATOM   3123  HG1 GLU A 495      99.220  32.170  24.270  1.00  0.00           H
ATOM   3124  HG2 GLU A 495      99.520  31.450  22.690  1.00  0.00           H
ATOM   3125  CD  GLU A 495      97.400  31.720  23.190  1.00  0.00           C
ATOM   3126  OE1 GLU A 495      96.600  31.890  24.120  1.00  0.00           O
ATOM   3127  OE2 GLU A 495      97.050  31.160  22.110  1.00  0.00           O
ATOM   3128  C   GLU A 495      99.170  36.060  22.850  1.00  0.00           C
ATOM   3129  O   GLU A 495     100.230  36.650  22.600  1.00  0.00           O
ATOM   3130  N   VAL A 496      97.960  36.510  22.420  1.00  0.00           N
ATOM   3131  H   VAL A 496      97.130  35.980  22.660  1.00  0.00           H
ATOM   3132  CA  VAL A 496      97.870  37.590  21.480  1.00  0.00           C
ATOM   3133  HA  VAL A 496      98.400  37.250  20.590  1.00  0.00           H
ATOM   3134  CB  VAL A 496      96.420  37.960  21.120  1.00  0.00           C
ATOM   3135  HB  VAL A 496      96.330  38.760  20.390  1.00  0.00           H
ATOM   3136  CG1 VAL A 496      95.620  36.780  20.410  1.00  0.00           C
ATOM   3137 1HG1 VAL A 496      96.180  36.610  19.480  1.00  0.00           H
ATOM   3138 2HG1 VAL A 496      95.530  35.900  21.040  1.00  0.00           H
ATOM   3139 3HG1 VAL A 496      94.630  37.110  20.120  1.00  0.00           H
ATOM   3140  CG2 VAL A 496      95.600  38.440  22.380  1.00  0.00           C
ATOM   3141 1HG2 VAL A 496      95.790  37.810  23.250  1.00  0.00           H
ATOM   3142 2HG2 VAL A 496      95.910  39.470  22.560  1.00  0.00           H
ATOM   3143 3HG2 VAL A 496      94.530  38.520  22.210  1.00  0.00           H
ATOM   3144  C   VAL A 496      98.600  38.900  21.970  1.00  0.00           C
ATOM   3145  O   VAL A 496      99.310  39.600  21.200  1.00  0.00           O
ATOM   3146  N   ASP A 497      98.540  39.200  23.290  1.00  0.00           N
ATOM   3147  H   ASP A 497      97.800  38.750  23.800  1.00  0.00           H
ATOM   3148  CA  ASP A 497      99.280  40.160  24.150  1.00  0.00           C
ATOM   3149  HA  ASP A 497      99.030  41.170  23.830  1.00  0.00           H
ATOM   3150  CB  ASP A 497      98.930  40.070  25.680  1.00  0.00           C
ATOM   3151  HB1 ASP A 497      99.410  40.970  26.080  1.00  0.00           H
ATOM   3152  HB2 ASP A 497      99.490  39.240  26.100  1.00  0.00           H
ATOM   3153  CG  ASP A 497      97.460  39.900  26.070  1.00  0.00           C
ATOM   3154  OD1 ASP A 497      96.610  39.960  25.120  1.00  0.00           O
ATOM   3155  OD2 ASP A 497      97.140  39.780  27.290  1.00  0.00           O
ATOM   3156  C   ASP A 497     100.790  40.060  23.980  1.00  0.00           C
ATOM   3157  O   ASP A 497     101.440  41.100  23.800  1.00  0.00           O
ATOM   3158  N   ILE A 498     101.410  38.840  23.960  1.00  0.00           N
ATOM   3159  H   ILE A 498     100.850  38.010  24.070  1.00  0.00           H
ATOM   3160  CA  ILE A 498     102.820  38.660  23.860  1.00  0.00           C
ATOM   3161  HA  ILE A 498     103.290  39.240  24.650  1.00  0.00           H
ATOM   3162  CB  ILE A 498     103.160  37.180  24.100  1.00  0.00           C
ATOM   3163  HB  ILE A 498     102.670  36.620  23.310  1.00  0.00           H
ATOM   3164  CG2 ILE A 498     104.640  36.850  24.110  1.00  0.00           C
ATOM   3165 1HG2 ILE A 498     105.120  37.380  23.290  1.00  0.00           H
ATOM   3166 2HG2 ILE A 498     105.120  37.210  25.020  1.00  0.00           H
ATOM   3167 3HG2 ILE A 498     104.860  35.800  23.940  1.00  0.00           H
ATOM   3168  CG1 ILE A 498     102.560  36.560  25.380  1.00  0.00           C
ATOM   3169 1HG1 ILE A 498     102.960  35.570  25.590  1.00  0.00           H
ATOM   3170 2HG1 ILE A 498     101.490  36.410  25.370  1.00  0.00           H
ATOM   3171  CD  ILE A 498     102.810  37.460  26.590  1.00  0.00           C
ATOM   3172  HD1 ILE A 498     102.170  38.340  26.650  1.00  0.00           H
ATOM   3173  HD2 ILE A 498     102.660  36.870  27.490  1.00  0.00           H
ATOM   3174  HD3 ILE A 498     103.870  37.740  26.600  1.00  0.00           H
ATOM   3175  C   ILE A 498     103.280  39.080  22.460  1.00  0.00           C
ATOM   3176  O   ILE A 498     104.330  39.640  22.280  1.00  0.00           O
ATOM   3177  N   TRP A 499     102.500  38.740  21.420  1.00  0.00           N
ATOM   3178  H   TRP A 499     101.640  38.260  21.660  1.00  0.00           H
ATOM   3179  CA  TRP A 499     102.710  39.340  20.070  1.00  0.00           C
ATOM   3180  HA  TRP A 499     103.720  39.060  19.780  1.00  0.00           H
ATOM   3181  CB  TRP A 499     101.760  38.690  19.130  1.00  0.00           C
ATOM   3182  HB1 TRP A 499     100.710  38.810  19.360  1.00  0.00           H
ATOM   3183  HB2 TRP A 499     101.980  37.630  19.190  1.00  0.00           H
ATOM   3184  CG  TRP A 499     101.760  39.220  17.760  1.00  0.00           C
ATOM   3185  CD1 TRP A 499     101.360  40.490  17.410  1.00  0.00           C
ATOM   3186  HD1 TRP A 499     100.770  41.120  18.060  1.00  0.00           H
ATOM   3187  NE1 TRP A 499     101.600  40.700  16.070  1.00  0.00           N
ATOM   3188  HE1 TRP A 499     101.410  41.550  15.560  1.00  0.00           H
ATOM   3189  CE2 TRP A 499     102.130  39.590  15.470  1.00  0.00           C
ATOM   3190  CZ2 TRP A 499     102.580  39.340  14.180  1.00  0.00           C
ATOM   3191  HZ2 TRP A 499     102.430  40.090  13.420  1.00  0.00           H
ATOM   3192  CH2 TRP A 499     103.150  38.150  13.820  1.00  0.00           C
ATOM   3193  HH2 TRP A 499     103.520  37.970  12.820  1.00  0.00           H
ATOM   3194  CZ3 TRP A 499     103.330  37.170  14.810  1.00  0.00           C
ATOM   3195  HZ3 TRP A 499     103.820  36.220  14.670  1.00  0.00           H
ATOM   3196  CE3 TRP A 499     102.840  37.430  16.130  1.00  0.00           C
ATOM   3197  HE3 TRP A 499     102.970  36.660  16.870  1.00  0.00           H
ATOM   3198  CD2 TRP A 499     102.240  38.640  16.510  1.00  0.00           C
ATOM   3199  C   TRP A 499     102.670  40.860  20.080  1.00  0.00           C
ATOM   3200  O   TRP A 499     103.600  41.530  19.630  1.00  0.00           O
ATOM   3201  N   SER A 500     101.640  41.460  20.740  1.00  0.00           N
ATOM   3202  H   SER A 500     100.930  40.940  21.230  1.00  0.00           H
ATOM   3203  CA  SER A 500     101.520  42.940  20.830  1.00  0.00           C
ATOM   3204  HA  SER A 500     101.570  43.320  19.820  1.00  0.00           H
ATOM   3205  CB  SER A 500     100.190  43.380  21.390  1.00  0.00           C
ATOM   3206  HB1 SER A 500     100.210  44.470  21.360  1.00  0.00           H
ATOM   3207  HB2 SER A 500     100.090  43.190  22.460  1.00  0.00           H
ATOM   3208  OG  SER A 500      99.040  42.860  20.760  1.00  0.00           O
ATOM   3209  HG  SER A 500      99.100  42.950  19.810  1.00  0.00           H
ATOM   3210  C   SER A 500     102.720  43.590  21.520  1.00  0.00           C
ATOM   3211  O   SER A 500     103.350  44.490  20.970  1.00  0.00           O
ATOM   3212  N   LEU A 501     103.120  42.980  22.620  1.00  0.00           N
ATOM   3213  H   LEU A 501     102.550  42.220  22.960  1.00  0.00           H
ATOM   3214  CA  LEU A 501     104.330  43.320  23.370  1.00  0.00           C
ATOM   3215  HA  LEU A 501     104.290  44.370  23.670  1.00  0.00           H
ATOM   3216  CB  LEU A 501     104.600  42.400  24.610  1.00  0.00           C
ATOM   3217  HB1 LEU A 501     104.580  41.370  24.280  1.00  0.00           H
ATOM   3218  HB2 LEU A 501     103.710  42.400  25.250  1.00  0.00           H
ATOM   3219  CG  LEU A 501     105.860  42.530  25.440  1.00  0.00           C
ATOM   3220  HG  LEU A 501     106.630  42.260  24.720  1.00  0.00           H
ATOM   3221  CD1 LEU A 501     106.090  43.950  26.040  1.00  0.00           C
ATOM   3222 1HD1 LEU A 501     107.010  43.910  26.630  1.00  0.00           H
ATOM   3223 2HD1 LEU A 501     106.200  44.760  25.320  1.00  0.00           H
ATOM   3224 3HD1 LEU A 501     105.320  44.180  26.780  1.00  0.00           H
ATOM   3225  CD2 LEU A 501     105.790  41.430  26.560  1.00  0.00           C
ATOM   3226 1HD2 LEU A 501     105.610  40.430  26.150  1.00  0.00           H
ATOM   3227 2HD2 LEU A 501     106.770  41.500  27.010  1.00  0.00           H
ATOM   3228 3HD2 LEU A 501     105.020  41.640  27.310  1.00  0.00           H
ATOM   3229  C   LEU A 501     105.580  43.260  22.460  1.00  0.00           C
ATOM   3230  O   LEU A 501     106.440  44.110  22.540  1.00  0.00           O
ATOM   3231  N   GLY A 502     105.720  42.180  21.690  1.00  0.00           N
ATOM   3232  H   GLY A 502     104.960  41.530  21.810  1.00  0.00           H
ATOM   3233  CA  GLY A 502     106.720  42.070  20.620  1.00  0.00           C
ATOM   3234  HA1 GLY A 502     106.570  41.170  20.030  1.00  0.00           H
ATOM   3235  HA2 GLY A 502     107.740  42.090  21.020  1.00  0.00           H
ATOM   3236  C   GLY A 502     106.770  43.170  19.600  1.00  0.00           C
ATOM   3237  O   GLY A 502     107.800  43.840  19.360  1.00  0.00           O
ATOM   3238  N   ILE A 503     105.570  43.570  19.060  1.00  0.00           N
ATOM   3239  H   ILE A 503     104.730  43.100  19.340  1.00  0.00           H
ATOM   3240  CA  ILE A 503     105.410  44.730  18.120  1.00  0.00           C
ATOM   3241  HA  ILE A 503     106.270  44.660  17.460  1.00  0.00           H
ATOM   3242  CB  ILE A 503     104.020  44.740  17.390  1.00  0.00           C
ATOM   3243  HB  ILE A 503     103.350  44.930  18.220  1.00  0.00           H
ATOM   3244  CG2 ILE A 503     103.980  45.930  16.410  1.00  0.00           C
ATOM   3245 1HG2 ILE A 503     103.550  46.790  16.910  1.00  0.00           H
ATOM   3246 2HG2 ILE A 503     104.980  46.110  16.020  1.00  0.00           H
ATOM   3247 3HG2 ILE A 503     103.410  45.690  15.520  1.00  0.00           H
ATOM   3248  CG1 ILE A 503     103.690  43.400  16.720  1.00  0.00           C
ATOM   3249 1HG1 ILE A 503     102.660  43.470  16.390  1.00  0.00           H
ATOM   3250 2HG1 ILE A 503     103.830  42.550  17.390  1.00  0.00           H
ATOM   3251  CD  ILE A 503     104.630  43.120  15.570  1.00  0.00           C
ATOM   3252  HD1 ILE A 503     104.320  42.170  15.130  1.00  0.00           H
ATOM   3253  HD2 ILE A 503     104.470  43.860  14.790  1.00  0.00           H
ATOM   3254  HD3 ILE A 503     105.630  43.080  16.010  1.00  0.00           H
ATOM   3255  C   ILE A 503     105.720  46.130  18.730  1.00  0.00           C
ATOM   3256  O   ILE A 503     106.270  47.040  18.120  1.00  0.00           O
ATOM   3257  N   MET A 504     105.610  46.150  20.080  1.00  0.00           N
ATOM   3258  H   MET A 504     105.350  45.320  20.600  1.00  0.00           H
ATOM   3259  CA  MET A 504     105.970  47.390  20.910  1.00  0.00           C
ATOM   3260  HA  MET A 504     105.640  48.220  20.280  1.00  0.00           H
ATOM   3261  CB  MET A 504     105.140  47.480  22.220  1.00  0.00           C
ATOM   3262  HB1 MET A 504     105.390  46.570  22.770  1.00  0.00           H
ATOM   3263  HB2 MET A 504     104.080  47.410  21.950  1.00  0.00           H
ATOM   3264  CG  MET A 504     105.450  48.750  23.060  1.00  0.00           C
ATOM   3265  HG1 MET A 504     105.160  49.640  22.510  1.00  0.00           H
ATOM   3266  HG2 MET A 504     106.520  48.730  23.250  1.00  0.00           H
ATOM   3267  SD  MET A 504     104.650  48.670  24.660  1.00  0.00           S
ATOM   3268  CE  MET A 504     105.800  47.840  25.710  1.00  0.00           C
ATOM   3269  HE1 MET A 504     106.110  47.000  25.080  1.00  0.00           H
ATOM   3270  HE2 MET A 504     106.670  48.470  25.850  1.00  0.00           H
ATOM   3271  HE3 MET A 504     105.300  47.460  26.600  1.00  0.00           H
ATOM   3272  C   MET A 504     107.480  47.550  21.130  1.00  0.00           C
ATOM   3273  O   MET A 504     108.020  48.620  21.120  1.00  0.00           O
ATOM   3274  N   VAL A 505     108.210  46.440  21.210  1.00  0.00           N
ATOM   3275  H   VAL A 505     107.840  45.510  21.300  1.00  0.00           H
ATOM   3276  CA  VAL A 505     109.670  46.390  21.210  1.00  0.00           C
ATOM   3277  HA  VAL A 505     110.100  47.030  21.980  1.00  0.00           H
ATOM   3278  CB  VAL A 505     110.160  45.010  21.640  1.00  0.00           C
ATOM   3279  HB  VAL A 505     109.790  44.200  21.010  1.00  0.00           H
ATOM   3280  CG1 VAL A 505     111.720  45.010  21.770  1.00  0.00           C
ATOM   3281 1HG1 VAL A 505     112.050  45.020  20.730  1.00  0.00           H
ATOM   3282 2HG1 VAL A 505     111.980  45.830  22.430  1.00  0.00           H
ATOM   3283 3HG1 VAL A 505     112.040  44.110  22.300  1.00  0.00           H
ATOM   3284  CG2 VAL A 505     109.790  44.670  23.050  1.00  0.00           C
ATOM   3285 1HG2 VAL A 505     109.850  43.590  23.100  1.00  0.00           H
ATOM   3286 2HG2 VAL A 505     110.390  45.230  23.770  1.00  0.00           H
ATOM   3287 3HG2 VAL A 505     108.750  44.930  23.240  1.00  0.00           H
ATOM   3288  C   VAL A 505     110.320  46.870  19.920  1.00  0.00           C
ATOM   3289  O   VAL A 505     111.370  47.540  19.970  1.00  0.00           O
ATOM   3290  N   ILE A 506     109.630  46.670  18.800  1.00  0.00           N
ATOM   3291  H   ILE A 506     108.730  46.240  18.950  1.00  0.00           H
ATOM   3292  CA  ILE A 506     109.980  47.390  17.560  1.00  0.00           C
ATOM   3293  HA  ILE A 506     111.050  47.210  17.450  1.00  0.00           H
ATOM   3294  CB  ILE A 506     109.300  46.880  16.320  1.00  0.00           C
ATOM   3295  HB  ILE A 506     108.240  47.040  16.500  1.00  0.00           H
ATOM   3296  CG2 ILE A 506     109.780  47.590  15.070  1.00  0.00           C
ATOM   3297 1HG2 ILE A 506     110.850  47.370  14.980  1.00  0.00           H
ATOM   3298 2HG2 ILE A 506     109.210  47.170  14.240  1.00  0.00           H
ATOM   3299 3HG2 ILE A 506     109.620  48.660  15.180  1.00  0.00           H
ATOM   3300  CG1 ILE A 506     109.520  45.280  16.250  1.00  0.00           C
ATOM   3301 1HG1 ILE A 506     109.070  44.900  17.170  1.00  0.00           H
ATOM   3302 2HG1 ILE A 506     110.610  45.220  16.320  1.00  0.00           H
ATOM   3303  CD  ILE A 506     108.990  44.580  14.960  1.00  0.00           C
ATOM   3304  HD1 ILE A 506     109.200  43.550  15.230  1.00  0.00           H
ATOM   3305  HD2 ILE A 506     107.920  44.650  14.770  1.00  0.00           H
ATOM   3306  HD3 ILE A 506     109.460  44.880  14.030  1.00  0.00           H
ATOM   3307  C   ILE A 506     109.790  48.980  17.790  1.00  0.00           C
ATOM   3308  O   ILE A 506     110.850  49.630  17.710  1.00  0.00           O
ATOM   3309  N   GLU A 507     108.620  49.510  18.140  1.00  0.00           N
ATOM   3310  H   GLU A 507     107.790  48.940  18.210  1.00  0.00           H
ATOM   3311  CA  GLU A 507     108.420  50.910  18.420  1.00  0.00           C
ATOM   3312  HA  GLU A 507     108.640  51.490  17.520  1.00  0.00           H
ATOM   3313  CB  GLU A 507     106.990  51.130  19.050  1.00  0.00           C
ATOM   3314  HB1 GLU A 507     106.900  50.570  19.980  1.00  0.00           H
ATOM   3315  HB2 GLU A 507     106.280  50.750  18.300  1.00  0.00           H
ATOM   3316  CG  GLU A 507     106.510  52.500  19.390  1.00  0.00           C
ATOM   3317  HG1 GLU A 507     106.530  53.230  18.590  1.00  0.00           H
ATOM   3318  HG2 GLU A 507     107.110  52.910  20.210  1.00  0.00           H
ATOM   3319  CD  GLU A 507     105.020  52.460  19.750  1.00  0.00           C
ATOM   3320  OE1 GLU A 507     104.690  51.660  20.700  1.00  0.00           O
ATOM   3321  OE2 GLU A 507     104.260  53.240  19.220  1.00  0.00           O
ATOM   3322  C   GLU A 507     109.390  51.480  19.480  1.00  0.00           C
ATOM   3323  O   GLU A 507     109.990  52.560  19.250  1.00  0.00           O
ATOM   3324  N   MET A 508     109.800  50.680  20.520  1.00  0.00           N
ATOM   3325  H   MET A 508     109.260  49.830  20.580  1.00  0.00           H
ATOM   3326  CA  MET A 508     110.800  51.010  21.570  1.00  0.00           C
ATOM   3327  HA  MET A 508     110.640  52.040  21.890  1.00  0.00           H
ATOM   3328  CB  MET A 508     110.790  50.000  22.790  1.00  0.00           C
ATOM   3329  HB1 MET A 508     111.660  50.210  23.410  1.00  0.00           H
ATOM   3330  HB2 MET A 508     110.860  48.990  22.380  1.00  0.00           H
ATOM   3331  CG  MET A 508     109.540  50.160  23.680  1.00  0.00           C
ATOM   3332  HG1 MET A 508     108.650  49.870  23.140  1.00  0.00           H
ATOM   3333  HG2 MET A 508     109.380  51.200  24.000  1.00  0.00           H
ATOM   3334  SD  MET A 508     109.520  49.240  25.280  1.00  0.00           S
ATOM   3335  CE  MET A 508     109.440  47.570  24.700  1.00  0.00           C
ATOM   3336  HE1 MET A 508     109.330  46.940  25.590  1.00  0.00           H
ATOM   3337  HE2 MET A 508     108.580  47.410  24.050  1.00  0.00           H
ATOM   3338  HE3 MET A 508     110.370  47.340  24.190  1.00  0.00           H
ATOM   3339  C   MET A 508     112.220  51.190  21.000  1.00  0.00           C
ATOM   3340  O   MET A 508     113.020  51.880  21.620  1.00  0.00           O
ATOM   3341  N   VAL A 509     112.620  50.520  19.930  1.00  0.00           N
ATOM   3342  H   VAL A 509     111.980  49.940  19.420  1.00  0.00           H
ATOM   3343  CA  VAL A 509     114.000  50.500  19.430  1.00  0.00           C
ATOM   3344  HA  VAL A 509     114.610  50.900  20.240  1.00  0.00           H
ATOM   3345  CB  VAL A 509     114.380  49.040  19.030  1.00  0.00           C
ATOM   3346  HB  VAL A 509     113.610  48.630  18.390  1.00  0.00           H
ATOM   3347  CG1 VAL A 509     115.710  49.210  18.260  1.00  0.00           C
ATOM   3348 1HG1 VAL A 509     116.440  49.790  18.810  1.00  0.00           H
ATOM   3349 2HG1 VAL A 509     116.090  48.210  18.020  1.00  0.00           H
ATOM   3350 3HG1 VAL A 509     115.640  49.680  17.280  1.00  0.00           H
ATOM   3351  CG2 VAL A 509     114.540  48.020  20.140  1.00  0.00           C
ATOM   3352 1HG2 VAL A 509     114.350  47.020  19.760  1.00  0.00           H
ATOM   3353 2HG2 VAL A 509     115.480  48.170  20.670  1.00  0.00           H
ATOM   3354 3HG2 VAL A 509     113.690  48.130  20.820  1.00  0.00           H
ATOM   3355  C   VAL A 509     114.060  51.430  18.190  1.00  0.00           C
ATOM   3356  O   VAL A 509     114.910  52.270  18.090  1.00  0.00           O
ATOM   3357  N   ASP A 510     113.060  51.380  17.310  1.00  0.00           N
ATOM   3358  H   ASP A 510     112.300  50.740  17.460  1.00  0.00           H
ATOM   3359  CA  ASP A 510     113.030  52.130  16.020  1.00  0.00           C
ATOM   3360  HA  ASP A 510     114.070  52.380  15.820  1.00  0.00           H
ATOM   3361  CB  ASP A 510     112.570  51.040  15.060  1.00  0.00           C
ATOM   3362  HB1 ASP A 510     111.530  50.740  15.230  1.00  0.00           H
ATOM   3363  HB2 ASP A 510     113.020  50.070  15.220  1.00  0.00           H
ATOM   3364  CG  ASP A 510     112.630  51.220  13.520  1.00  0.00           C
ATOM   3365  OD1 ASP A 510     111.870  50.560  12.830  1.00  0.00           O
ATOM   3366  OD2 ASP A 510     113.510  51.990  13.120  1.00  0.00           O
ATOM   3367  C   ASP A 510     112.180  53.390  15.930  1.00  0.00           C
ATOM   3368  O   ASP A 510     112.370  54.230  15.060  1.00  0.00           O
ATOM   3369  N   GLY A 511     111.220  53.590  16.830  1.00  0.00           N
ATOM   3370  H   GLY A 511     111.270  53.010  17.660  1.00  0.00           H
ATOM   3371  CA  GLY A 511     110.360  54.800  17.110  1.00  0.00           C
ATOM   3372  HA1 GLY A 511     110.960  55.680  16.890  1.00  0.00           H
ATOM   3373  HA2 GLY A 511     110.080  54.730  18.160  1.00  0.00           H
ATOM   3374  C   GLY A 511     109.070  54.670  16.360  1.00  0.00           C
ATOM   3375  O   GLY A 511     108.190  55.470  16.640  1.00  0.00           O
ATOM   3376  N   GLU A 512     108.860  53.700  15.470  1.00  0.00           N
ATOM   3377  H   GLU A 512     109.600  53.030  15.410  1.00  0.00           H
ATOM   3378  CA  GLU A 512     107.570  53.270  14.880  1.00  0.00           C
ATOM   3379  HA  GLU A 512     106.790  53.500  15.600  1.00  0.00           H
ATOM   3380  CB  GLU A 512     107.320  54.010  13.580  1.00  0.00           C
ATOM   3381  HB1 GLU A 512     107.360  55.090  13.700  1.00  0.00           H
ATOM   3382  HB2 GLU A 512     106.350  53.620  13.240  1.00  0.00           H
ATOM   3383  CG  GLU A 512     108.400  53.720  12.510  1.00  0.00           C
ATOM   3384  HG1 GLU A 512     108.660  52.660  12.510  1.00  0.00           H
ATOM   3385  HG2 GLU A 512     109.360  54.110  12.850  1.00  0.00           H
ATOM   3386  CD  GLU A 512     108.000  54.220  11.080  1.00  0.00           C
ATOM   3387  OE1 GLU A 512     107.630  53.390  10.260  1.00  0.00           O
ATOM   3388  OE2 GLU A 512     108.040  55.440  10.870  1.00  0.00           O
ATOM   3389  C   GLU A 512     107.360  51.820  14.710  1.00  0.00           C
ATOM   3390  O   GLU A 512     108.400  51.160  14.530  1.00  0.00           O
ATOM   3391  N   PRO A 513     106.150  51.240  14.790  1.00  0.00           N
ATOM   3392  CD  PRO A 513     104.850  51.900  15.000  1.00  0.00           C
ATOM   3393  HD1 PRO A 513     104.640  52.640  14.220  1.00  0.00           H
ATOM   3394  HD2 PRO A 513     104.850  52.350  15.990  1.00  0.00           H
ATOM   3395  CG  PRO A 513     103.910  50.810  14.820  1.00  0.00           C
ATOM   3396  HG1 PRO A 513     103.810  50.840  13.730  1.00  0.00           H
ATOM   3397  HG2 PRO A 513     102.940  50.910  15.320  1.00  0.00           H
ATOM   3398  CB  PRO A 513     104.600  49.490  15.200  1.00  0.00           C
ATOM   3399  HB1 PRO A 513     104.080  48.660  14.720  1.00  0.00           H
ATOM   3400  HB2 PRO A 513     104.660  49.370  16.280  1.00  0.00           H
ATOM   3401  CA  PRO A 513     105.950  49.800  14.600  1.00  0.00           C
ATOM   3402  HA  PRO A 513     106.700  49.240  15.160  1.00  0.00           H
ATOM   3403  C   PRO A 513     106.040  49.450  13.080  1.00  0.00           C
ATOM   3404  O   PRO A 513     106.070  50.310  12.170  1.00  0.00           O
ATOM   3405  N   PRO A 514     106.050  48.140  12.690  1.00  0.00           N
ATOM   3406  CD  PRO A 514     106.180  46.920  13.470  1.00  0.00           C
ATOM   3407  HD1 PRO A 514     105.200  46.570  13.790  1.00  0.00           H
ATOM   3408  HD2 PRO A 514     106.860  47.070  14.310  1.00  0.00           H
ATOM   3409  CG  PRO A 514     106.660  45.890  12.510  1.00  0.00           C
ATOM   3410  HG1 PRO A 514     106.410  44.910  12.930  1.00  0.00           H
ATOM   3411  HG2 PRO A 514     107.710  46.100  12.320  1.00  0.00           H
ATOM   3412  CB  PRO A 514     105.820  46.210  11.320  1.00  0.00           C
ATOM   3413  HB1 PRO A 514     104.780  45.900  11.480  1.00  0.00           H
ATOM   3414  HB2 PRO A 514     106.250  45.860  10.390  1.00  0.00           H
ATOM   3415  CA  PRO A 514     105.740  47.710  11.290  1.00  0.00           C
ATOM   3416  HA  PRO A 514     106.480  48.080  10.590  1.00  0.00           H
ATOM   3417  C   PRO A 514     104.380  48.130  10.820  1.00  0.00           C
ATOM   3418  O   PRO A 514     103.500  48.110  11.630  1.00  0.00           O
ATOM   3419  N   TYR A 515     104.190  48.320   9.530  1.00  0.00           N
ATOM   3420  H   TYR A 515     105.050  48.260   9.000  1.00  0.00           H
ATOM   3421  CA  TYR A 515     102.970  48.610   8.750  1.00  0.00           C
ATOM   3422  HA  TYR A 515     103.270  48.780   7.720  1.00  0.00           H
ATOM   3423  CB  TYR A 515     102.140  47.310   8.670  1.00  0.00           C
ATOM   3424  HB1 TYR A 515     101.230  47.410   8.090  1.00  0.00           H
ATOM   3425  HB2 TYR A 515     101.810  47.170   9.700  1.00  0.00           H
ATOM   3426  CG  TYR A 515     103.030  46.140   8.060  1.00  0.00           C
ATOM   3427  CD1 TYR A 515     103.480  46.160   6.750  1.00  0.00           C
ATOM   3428  HD1 TYR A 515     103.240  47.050   6.170  1.00  0.00           H
ATOM   3429  CE1 TYR A 515     104.060  45.040   6.140  1.00  0.00           C
ATOM   3430  HE1 TYR A 515     104.240  45.020   5.070  1.00  0.00           H
ATOM   3431  CZ  TYR A 515     104.370  43.920   6.950  1.00  0.00           C
ATOM   3432  OH  TYR A 515     105.120  42.890   6.480  1.00  0.00           O
ATOM   3433  HH  TYR A 515     105.240  42.250   7.190  1.00  0.00           H
ATOM   3434  CE2 TYR A 515     104.050  43.930   8.280  1.00  0.00           C
ATOM   3435  HE2 TYR A 515     104.400  43.090   8.860  1.00  0.00           H
ATOM   3436  CD2 TYR A 515     103.200  44.920   8.810  1.00  0.00           C
ATOM   3437  HD2 TYR A 515     102.930  44.990   9.850  1.00  0.00           H
ATOM   3438  C   TYR A 515     102.230  49.950   8.940  1.00  0.00           C
ATOM   3439  O   TYR A 515     101.210  50.240   8.320  1.00  0.00           O
ATOM   3440  N   PHE A 516     102.780  50.820   9.800  1.00  0.00           N
ATOM   3441  H   PHE A 516     103.640  50.510  10.220  1.00  0.00           H
ATOM   3442  CA  PHE A 516     102.170  52.030  10.360  1.00  0.00           C
ATOM   3443  HA  PHE A 516     101.320  51.680  10.950  1.00  0.00           H
ATOM   3444  CB  PHE A 516     103.150  52.710  11.290  1.00  0.00           C
ATOM   3445  HB1 PHE A 516     103.940  53.210  10.740  1.00  0.00           H
ATOM   3446  HB2 PHE A 516     103.650  51.920  11.840  1.00  0.00           H
ATOM   3447  CG  PHE A 516     102.450  53.680  12.240  1.00  0.00           C
ATOM   3448  CD1 PHE A 516     101.620  53.170  13.230  1.00  0.00           C
ATOM   3449  HD1 PHE A 516     101.510  52.100  13.280  1.00  0.00           H
ATOM   3450  CE1 PHE A 516     100.960  53.930  14.200  1.00  0.00           C
ATOM   3451  HE1 PHE A 516     100.190  53.520  14.840  1.00  0.00           H
ATOM   3452  CZ  PHE A 516     101.100  55.350  14.140  1.00  0.00           C
ATOM   3453  HZ  PHE A 516     100.580  55.970  14.850  1.00  0.00           H
ATOM   3454  CE2 PHE A 516     101.910  55.920  13.110  1.00  0.00           C
ATOM   3455  HE2 PHE A 516     101.940  57.000  13.090  1.00  0.00           H
ATOM   3456  CD2 PHE A 516     102.580  55.070  12.220  1.00  0.00           C
ATOM   3457  HD2 PHE A 516     103.120  55.560  11.410  1.00  0.00           H
ATOM   3458  C   PHE A 516     101.720  53.010   9.330  1.00  0.00           C
ATOM   3459  O   PHE A 516     100.690  53.640   9.550  1.00  0.00           O
ATOM   3460  N   ASN A 517     102.350  53.090   8.170  1.00  0.00           N
ATOM   3461  H   ASN A 517     103.220  52.620   7.990  1.00  0.00           H
ATOM   3462  CA  ASN A 517     101.930  54.010   7.080  1.00  0.00           C
ATOM   3463  HA  ASN A 517     101.470  54.850   7.610  1.00  0.00           H
ATOM   3464  CB  ASN A 517     103.190  54.470   6.380  1.00  0.00           C
ATOM   3465  HB1 ASN A 517     102.920  55.290   5.710  1.00  0.00           H
ATOM   3466  HB2 ASN A 517     103.560  53.620   5.810  1.00  0.00           H
ATOM   3467  CG  ASN A 517     104.290  55.120   7.230  1.00  0.00           C
ATOM   3468  OD1 ASN A 517     105.440  55.020   6.890  1.00  0.00           O
ATOM   3469  ND2 ASN A 517     103.960  55.940   8.220  1.00  0.00           N
ATOM   3470 1HD2 ASN A 517     102.990  55.970   8.510  1.00  0.00           H
ATOM   3471 2HD2 ASN A 517     104.690  56.280   8.830  1.00  0.00           H
ATOM   3472  C   ASN A 517     100.780  53.540   6.200  1.00  0.00           C
ATOM   3473  O   ASN A 517     100.540  54.200   5.220  1.00  0.00           O
ATOM   3474  N   GLU A 518     100.090  52.480   6.450  1.00  0.00           N
ATOM   3475  H   GLU A 518     100.250  51.980   7.310  1.00  0.00           H
ATOM   3476  CA  GLU A 518      98.960  51.980   5.670  1.00  0.00           C
ATOM   3477  HA  GLU A 518      98.950  52.430   4.680  1.00  0.00           H
ATOM   3478  CB  GLU A 518      99.150  50.450   5.440  1.00  0.00           C
ATOM   3479  HB1 GLU A 518      98.340  49.970   4.900  1.00  0.00           H
ATOM   3480  HB2 GLU A 518      99.290  49.900   6.360  1.00  0.00           H
ATOM   3481  CG  GLU A 518     100.470  50.190   4.640  1.00  0.00           C
ATOM   3482  HG1 GLU A 518     100.570  49.120   4.450  1.00  0.00           H
ATOM   3483  HG2 GLU A 518     101.300  50.550   5.240  1.00  0.00           H
ATOM   3484  CD  GLU A 518     100.590  50.760   3.180  1.00  0.00           C
ATOM   3485  OE1 GLU A 518      99.600  51.140   2.620  1.00  0.00           O
ATOM   3486  OE2 GLU A 518     101.740  50.960   2.810  1.00  0.00           O
ATOM   3487  C   GLU A 518      97.610  52.100   6.400  1.00  0.00           C
ATOM   3488  O   GLU A 518      97.610  52.140   7.660  1.00  0.00           O
ATOM   3489  N   PRO A 519      96.500  52.210   5.650  1.00  0.00           N
ATOM   3490  CD  PRO A 519      96.440  52.280   4.210  1.00  0.00           C
ATOM   3491  HD1 PRO A 519      97.010  51.430   3.840  1.00  0.00           H
ATOM   3492  HD2 PRO A 519      96.910  53.190   3.830  1.00  0.00           H
ATOM   3493  CG  PRO A 519      94.960  52.140   3.820  1.00  0.00           C
ATOM   3494  HG1 PRO A 519      94.730  51.110   3.550  1.00  0.00           H
ATOM   3495  HG2 PRO A 519      94.710  52.790   2.980  1.00  0.00           H
ATOM   3496  CB  PRO A 519      94.220  52.550   5.090  1.00  0.00           C
ATOM   3497  HB1 PRO A 519      93.310  51.970   5.260  1.00  0.00           H
ATOM   3498  HB2 PRO A 519      94.010  53.610   4.990  1.00  0.00           H
ATOM   3499  CA  PRO A 519      95.130  52.150   6.250  1.00  0.00           C
ATOM   3500  HA  PRO A 519      95.010  52.930   7.000  1.00  0.00           H
ATOM   3501  C   PRO A 519      94.780  50.770   6.840  1.00  0.00           C
ATOM   3502  O   PRO A 519      95.510  49.820   6.610  1.00  0.00           O
ATOM   3503  N   PRO A 520      93.760  50.620   7.630  1.00  0.00           N
ATOM   3504  CD  PRO A 520      92.770  51.570   8.050  1.00  0.00           C
ATOM   3505  HD1 PRO A 520      92.140  51.840   7.210  1.00  0.00           H
ATOM   3506  HD2 PRO A 520      93.240  52.450   8.490  1.00  0.00           H
ATOM   3507  CG  PRO A 520      91.920  50.830   9.040  1.00  0.00           C
ATOM   3508  HG1 PRO A 520      91.150  50.240   8.540  1.00  0.00           H
ATOM   3509  HG2 PRO A 520      91.450  51.500   9.770  1.00  0.00           H
ATOM   3510  CB  PRO A 520      92.840  49.930   9.800  1.00  0.00           C
ATOM   3511  HB1 PRO A 520      92.210  49.150  10.240  1.00  0.00           H
ATOM   3512  HB2 PRO A 520      93.310  50.470  10.620  1.00  0.00           H
ATOM   3513  CA  PRO A 520      93.790  49.490   8.630  1.00  0.00           C
ATOM   3514  HA  PRO A 520      94.780  49.400   9.080  1.00  0.00           H
ATOM   3515  C   PRO A 520      93.500  48.050   8.100  1.00  0.00           C
ATOM   3516  O   PRO A 520      94.200  47.130   8.570  1.00  0.00           O
ATOM   3517  N   LEU A 521      92.580  47.860   7.130  1.00  0.00           N
ATOM   3518  H   LEU A 521      92.050  48.660   6.810  1.00  0.00           H
ATOM   3519  CA  LEU A 521      92.350  46.600   6.490  1.00  0.00           C
ATOM   3520  HA  LEU A 521      92.490  45.780   7.200  1.00  0.00           H
ATOM   3521  CB  LEU A 521      90.970  46.510   5.800  1.00  0.00           C
ATOM   3522  HB1 LEU A 521      90.910  45.510   5.370  1.00  0.00           H
ATOM   3523  HB2 LEU A 521      90.770  47.200   4.990  1.00  0.00           H
ATOM   3524  CG  LEU A 521      89.760  46.700   6.750  1.00  0.00           C
ATOM   3525  HG  LEU A 521      89.930  47.660   7.240  1.00  0.00           H
ATOM   3526  CD1 LEU A 521      88.450  46.790   6.000  1.00  0.00           C
ATOM   3527 1HD1 LEU A 521      87.670  47.170   6.660  1.00  0.00           H
ATOM   3528 2HD1 LEU A 521      88.590  47.480   5.170  1.00  0.00           H
ATOM   3529 3HD1 LEU A 521      88.200  45.790   5.650  1.00  0.00           H
ATOM   3530  CD2 LEU A 521      89.600  45.580   7.770  1.00  0.00           C
ATOM   3531 1HD2 LEU A 521      88.810  45.780   8.490  1.00  0.00           H
ATOM   3532 2HD2 LEU A 521      89.590  44.600   7.290  1.00  0.00           H
ATOM   3533 3HD2 LEU A 521      90.500  45.560   8.380  1.00  0.00           H
ATOM   3534  C   LEU A 521      93.490  46.190   5.600  1.00  0.00           C
ATOM   3535  O   LEU A 521      93.810  45.020   5.600  1.00  0.00           O
ATOM   3536  N   LYS A 522      94.200  47.140   4.950  1.00  0.00           N
ATOM   3537  H   LYS A 522      93.930  48.110   4.990  1.00  0.00           H
ATOM   3538  CA  LYS A 522      95.460  46.870   4.170  1.00  0.00           C
ATOM   3539  HA  LYS A 522      95.270  46.020   3.510  1.00  0.00           H
ATOM   3540  CB  LYS A 522      95.770  48.160   3.380  1.00  0.00           C
ATOM   3541  HB1 LYS A 522      96.150  48.900   4.090  1.00  0.00           H
ATOM   3542  HB2 LYS A 522      94.820  48.570   3.050  1.00  0.00           H
ATOM   3543  CG  LYS A 522      96.710  47.830   2.200  1.00  0.00           C
ATOM   3544  HG1 LYS A 522      96.160  47.240   1.460  1.00  0.00           H
ATOM   3545  HG2 LYS A 522      97.580  47.300   2.580  1.00  0.00           H
ATOM   3546  CD  LYS A 522      97.100  49.120   1.460  1.00  0.00           C
ATOM   3547  HD1 LYS A 522      97.400  49.910   2.140  1.00  0.00           H
ATOM   3548  HD2 LYS A 522      96.350  49.430   0.730  1.00  0.00           H
ATOM   3549  CE  LYS A 522      98.490  48.880   0.770  1.00  0.00           C
ATOM   3550  HE1 LYS A 522      98.370  48.150  -0.030  1.00  0.00           H
ATOM   3551  HE2 LYS A 522      99.240  48.470   1.450  1.00  0.00           H
ATOM   3552  NZ  LYS A 522      99.010  50.130   0.090  1.00  0.00           N
ATOM   3553  HZ1 LYS A 522      99.190  50.870   0.740  1.00  0.00           H
ATOM   3554  HZ2 LYS A 522      99.870  49.890  -0.380  1.00  0.00           H
ATOM   3555  HZ3 LYS A 522      98.370  50.460  -0.620  1.00  0.00           H
ATOM   3556  C   LYS A 522      96.670  46.550   5.070  1.00  0.00           C
ATOM   3557  O   LYS A 522      97.370  45.620   4.810  1.00  0.00           O
ATOM   3558  N   ALA A 523      96.780  47.160   6.200  1.00  0.00           N
ATOM   3559  H   ALA A 523      96.140  47.900   6.460  1.00  0.00           H
ATOM   3560  CA  ALA A 523      97.690  46.700   7.260  1.00  0.00           C
ATOM   3561  HA  ALA A 523      98.710  46.770   6.890  1.00  0.00           H
ATOM   3562  CB  ALA A 523      97.720  47.570   8.520  1.00  0.00           C
ATOM   3563  HB1 ALA A 523      98.170  48.550   8.350  1.00  0.00           H
ATOM   3564  HB2 ALA A 523      96.740  47.570   8.990  1.00  0.00           H
ATOM   3565  HB3 ALA A 523      98.430  47.090   9.190  1.00  0.00           H
ATOM   3566  C   ALA A 523      97.410  45.240   7.680  1.00  0.00           C
ATOM   3567  O   ALA A 523      98.300  44.420   7.840  1.00  0.00           O
ATOM   3568  N   MET A 524      96.120  44.930   7.890  1.00  0.00           N
ATOM   3569  H   MET A 524      95.410  45.650   7.900  1.00  0.00           H
ATOM   3570  CA  MET A 524      95.620  43.600   8.230  1.00  0.00           C
ATOM   3571  HA  MET A 524      96.210  43.190   9.050  1.00  0.00           H
ATOM   3572  CB  MET A 524      94.160  43.560   8.600  1.00  0.00           C
ATOM   3573  HB1 MET A 524      93.710  42.580   8.430  1.00  0.00           H
ATOM   3574  HB2 MET A 524      93.590  44.190   7.920  1.00  0.00           H
ATOM   3575  CG  MET A 524      93.810  43.980  10.020  1.00  0.00           C
ATOM   3576  HG1 MET A 524      94.300  44.950  10.080  1.00  0.00           H
ATOM   3577  HG2 MET A 524      94.180  43.300  10.780  1.00  0.00           H
ATOM   3578  SD  MET A 524      91.990  44.220  10.360  1.00  0.00           S
ATOM   3579  CE  MET A 524      92.150  45.310  11.740  1.00  0.00           C
ATOM   3580  HE1 MET A 524      92.810  44.930  12.520  1.00  0.00           H
ATOM   3581  HE2 MET A 524      92.520  46.240  11.330  1.00  0.00           H
ATOM   3582  HE3 MET A 524      91.150  45.400  12.170  1.00  0.00           H
ATOM   3583  C   MET A 524      96.020  42.470   7.140  1.00  0.00           C
ATOM   3584  O   MET A 524      96.400  41.370   7.530  1.00  0.00           O
ATOM   3585  N   LYS A 525      95.860  42.800   5.870  1.00  0.00           N
ATOM   3586  H   LYS A 525      95.310  43.630   5.700  1.00  0.00           H
ATOM   3587  CA  LYS A 525      96.280  42.020   4.670  1.00  0.00           C
ATOM   3588  HA  LYS A 525      95.700  41.100   4.640  1.00  0.00           H
ATOM   3589  CB  LYS A 525      95.970  42.810   3.380  1.00  0.00           C
ATOM   3590  HB1 LYS A 525      96.360  43.820   3.530  1.00  0.00           H
ATOM   3591  HB2 LYS A 525      94.890  42.910   3.290  1.00  0.00           H
ATOM   3592  CG  LYS A 525      96.350  42.170   2.040  1.00  0.00           C
ATOM   3593  HG1 LYS A 525      97.430  42.000   2.050  1.00  0.00           H
ATOM   3594  HG2 LYS A 525      96.310  42.970   1.290  1.00  0.00           H
ATOM   3595  CD  LYS A 525      95.540  40.870   1.820  1.00  0.00           C
ATOM   3596  HD1 LYS A 525      94.490  41.170   1.760  1.00  0.00           H
ATOM   3597  HD2 LYS A 525      95.630  40.140   2.620  1.00  0.00           H
ATOM   3598  CE  LYS A 525      95.990  40.160   0.530  1.00  0.00           C
ATOM   3599  HE1 LYS A 525      96.130  41.020  -0.140  1.00  0.00           H
ATOM   3600  HE2 LYS A 525      95.110  39.600   0.230  1.00  0.00           H
ATOM   3601  NZ  LYS A 525      97.140  39.200   0.570  1.00  0.00           N
ATOM   3602  HZ1 LYS A 525      97.970  39.690   0.270  1.00  0.00           H
ATOM   3603  HZ2 LYS A 525      97.200  38.820   1.500  1.00  0.00           H
ATOM   3604  HZ3 LYS A 525      96.970  38.430  -0.070  1.00  0.00           H
ATOM   3605  C   LYS A 525      97.840  41.660   4.820  1.00  0.00           C
ATOM   3606  O   LYS A 525      98.280  40.500   4.630  1.00  0.00           O
ATOM   3607  N   MET A 526      98.560  42.690   5.180  1.00  0.00           N
ATOM   3608  H   MET A 526      98.220  43.630   5.310  1.00  0.00           H
ATOM   3609  CA  MET A 526     100.020  42.580   5.360  1.00  0.00           C
ATOM   3610  HA  MET A 526     100.360  41.900   4.580  1.00  0.00           H
ATOM   3611  CB  MET A 526     100.830  43.890   5.250  1.00  0.00           C
ATOM   3612  HB1 MET A 526     101.910  43.840   5.440  1.00  0.00           H
ATOM   3613  HB2 MET A 526     100.510  44.610   6.000  1.00  0.00           H
ATOM   3614  CG  MET A 526     100.630  44.630   3.900  1.00  0.00           C
ATOM   3615  HG1 MET A 526     101.420  45.370   3.780  1.00  0.00           H
ATOM   3616  HG2 MET A 526      99.750  45.260   4.040  1.00  0.00           H
ATOM   3617  SD  MET A 526     100.520  43.550   2.460  1.00  0.00           S
ATOM   3618  CE  MET A 526      99.300  44.600   1.550  1.00  0.00           C
ATOM   3619  HE1 MET A 526      98.480  44.920   2.190  1.00  0.00           H
ATOM   3620  HE2 MET A 526      99.790  45.490   1.150  1.00  0.00           H
ATOM   3621  HE3 MET A 526      98.770  44.130   0.720  1.00  0.00           H
ATOM   3622  C   MET A 526     100.420  41.860   6.630  1.00  0.00           C
ATOM   3623  O   MET A 526     101.160  40.900   6.580  1.00  0.00           O
ATOM   3624  N   ILE A 527      99.800  42.110   7.770  1.00  0.00           N
ATOM   3625  H   ILE A 527      99.090  42.830   7.760  1.00  0.00           H
ATOM   3626  CA  ILE A 527      99.990  41.340   8.970  1.00  0.00           C
ATOM   3627  HA  ILE A 527     101.040  41.320   9.270  1.00  0.00           H
ATOM   3628  CB  ILE A 527      99.400  41.930  10.310  1.00  0.00           C
ATOM   3629  HB  ILE A 527      98.310  41.850  10.240  1.00  0.00           H
ATOM   3630  CG2 ILE A 527      99.690  41.170  11.580  1.00  0.00           C
ATOM   3631 1HG2 ILE A 527      99.070  41.520  12.400  1.00  0.00           H
ATOM   3632 2HG2 ILE A 527      99.540  40.100  11.470  1.00  0.00           H
ATOM   3633 3HG2 ILE A 527     100.730  41.240  11.910  1.00  0.00           H
ATOM   3634  CG1 ILE A 527      99.740  43.410  10.530  1.00  0.00           C
ATOM   3635 1HG1 ILE A 527      99.880  43.920   9.580  1.00  0.00           H
ATOM   3636 2HG1 ILE A 527     100.700  43.570  11.020  1.00  0.00           H
ATOM   3637  CD  ILE A 527      98.610  44.130  11.240  1.00  0.00           C
ATOM   3638  HD1 ILE A 527      97.610  43.770  11.020  1.00  0.00           H
ATOM   3639  HD2 ILE A 527      98.830  44.270  12.300  1.00  0.00           H
ATOM   3640  HD3 ILE A 527      98.790  45.150  10.880  1.00  0.00           H
ATOM   3641  C   ILE A 527      99.570  39.830   8.830  1.00  0.00           C
ATOM   3642  O   ILE A 527     100.370  39.000   9.390  1.00  0.00           O
ATOM   3643  N   ARG A 528      98.450  39.490   8.200  1.00  0.00           N
ATOM   3644  H   ARG A 528      97.850  40.210   7.830  1.00  0.00           H
ATOM   3645  CA  ARG A 528      97.910  38.200   8.280  1.00  0.00           C
ATOM   3646  HA  ARG A 528      97.890  37.940   9.340  1.00  0.00           H
ATOM   3647  CB  ARG A 528      96.420  38.330   7.930  1.00  0.00           C
ATOM   3648  HB1 ARG A 528      96.330  38.620   6.890  1.00  0.00           H
ATOM   3649  HB2 ARG A 528      96.050  39.180   8.500  1.00  0.00           H
ATOM   3650  CG  ARG A 528      95.580  37.110   8.260  1.00  0.00           C
ATOM   3651  HG1 ARG A 528      95.520  36.980   9.340  1.00  0.00           H
ATOM   3652  HG2 ARG A 528      95.970  36.120   8.010  1.00  0.00           H
ATOM   3653  CD  ARG A 528      94.210  37.250   7.560  1.00  0.00           C
ATOM   3654  HD1 ARG A 528      93.820  38.260   7.730  1.00  0.00           H
ATOM   3655  HD2 ARG A 528      93.650  36.380   7.900  1.00  0.00           H
ATOM   3656  NE  ARG A 528      94.380  37.110   6.090  1.00  0.00           N
ATOM   3657  HE  ARG A 528      95.350  36.940   5.880  1.00  0.00           H
ATOM   3658  CZ  ARG A 528      93.600  37.470   5.130  1.00  0.00           C
ATOM   3659  NH1 ARG A 528      92.370  37.890   5.380  1.00  0.00           N
ATOM   3660 1HH1 ARG A 528      91.880  37.690   6.240  1.00  0.00           H
ATOM   3661 2HH1 ARG A 528      91.860  38.200   4.560  1.00  0.00           H
ATOM   3662  NH2 ARG A 528      94.200  37.660   4.010  1.00  0.00           N
ATOM   3663 1HH2 ARG A 528      95.200  37.550   4.020  1.00  0.00           H
ATOM   3664 2HH2 ARG A 528      93.610  38.010   3.260  1.00  0.00           H
ATOM   3665  C   ARG A 528      98.710  37.210   7.470  1.00  0.00           C
ATOM   3666  O   ARG A 528      98.900  36.040   7.900  1.00  0.00           O
ATOM   3667  N   ASP A 529      99.160  37.680   6.330  1.00  0.00           N
ATOM   3668  H   ASP A 529      98.890  38.630   6.100  1.00  0.00           H
ATOM   3669  CA  ASP A 529      99.700  36.750   5.250  1.00  0.00           C
ATOM   3670  HA  ASP A 529      99.350  35.750   5.530  1.00  0.00           H
ATOM   3671  CB  ASP A 529      98.950  36.950   3.870  1.00  0.00           C
ATOM   3672  HB1 ASP A 529      99.190  36.160   3.160  1.00  0.00           H
ATOM   3673  HB2 ASP A 529      99.430  37.820   3.400  1.00  0.00           H
ATOM   3674  CG  ASP A 529      97.460  37.100   3.950  1.00  0.00           C
ATOM   3675  OD1 ASP A 529      96.820  37.760   3.100  1.00  0.00           O
ATOM   3676  OD2 ASP A 529      96.850  36.570   4.900  1.00  0.00           O
ATOM   3677  C   ASP A 529     101.240  36.730   5.120  1.00  0.00           C
ATOM   3678  O   ASP A 529     101.810  35.780   4.630  1.00  0.00           O
ATOM   3679  N   ASN A 530     101.920  37.830   5.520  1.00  0.00           N
ATOM   3680  H   ASN A 530     101.370  38.620   5.800  1.00  0.00           H
ATOM   3681  CA  ASN A 530     103.400  38.030   5.470  1.00  0.00           C
ATOM   3682  HA  ASN A 530     103.830  37.630   4.550  1.00  0.00           H
ATOM   3683  CB  ASN A 530     103.640  39.520   5.620  1.00  0.00           C
ATOM   3684  HB1 ASN A 530     104.690  39.690   5.860  1.00  0.00           H
ATOM   3685  HB2 ASN A 530     103.200  39.930   6.530  1.00  0.00           H
ATOM   3686  CG  ASN A 530     103.180  40.440   4.390  1.00  0.00           C
ATOM   3687  OD1 ASN A 530     102.340  40.060   3.610  1.00  0.00           O
ATOM   3688  ND2 ASN A 530     103.750  41.590   4.200  1.00  0.00           N
ATOM   3689 1HD2 ASN A 530     104.410  41.820   4.920  1.00  0.00           H
ATOM   3690 2HD2 ASN A 530     103.280  42.270   3.610  1.00  0.00           H
ATOM   3691  C   ASN A 530     104.080  37.220   6.630  1.00  0.00           C
ATOM   3692  O   ASN A 530     103.430  37.050   7.690  1.00  0.00           O
ATOM   3693  N   LEU A 531     105.300  36.910   6.450  1.00  0.00           N
ATOM   3694  H   LEU A 531     105.790  37.470   5.760  1.00  0.00           H
ATOM   3695  CA  LEU A 531     106.150  36.300   7.460  1.00  0.00           C
ATOM   3696  HA  LEU A 531     105.730  35.300   7.590  1.00  0.00           H
ATOM   3697  CB  LEU A 531     107.580  36.040   6.850  1.00  0.00           C
ATOM   3698  HB1 LEU A 531     108.230  35.700   7.660  1.00  0.00           H
ATOM   3699  HB2 LEU A 531     107.930  37.060   6.680  1.00  0.00           H
ATOM   3700  CG  LEU A 531     107.660  35.060   5.620  1.00  0.00           C
ATOM   3701  HG  LEU A 531     106.970  35.480   4.880  1.00  0.00           H
ATOM   3702  CD1 LEU A 531     109.160  35.150   5.210  1.00  0.00           C
ATOM   3703 1HD1 LEU A 531     109.490  34.460   4.430  1.00  0.00           H
ATOM   3704 2HD1 LEU A 531     109.450  36.080   4.720  1.00  0.00           H
ATOM   3705 3HD1 LEU A 531     109.660  34.940   6.150  1.00  0.00           H
ATOM   3706  CD2 LEU A 531     107.310  33.630   5.900  1.00  0.00           C
ATOM   3707 1HD2 LEU A 531     107.910  33.260   6.730  1.00  0.00           H
ATOM   3708 2HD2 LEU A 531     106.250  33.570   6.170  1.00  0.00           H
ATOM   3709 3HD2 LEU A 531     107.420  33.060   4.980  1.00  0.00           H
ATOM   3710  C   LEU A 531     106.210  37.170   8.730  1.00  0.00           C
ATOM   3711  O   LEU A 531     106.000  38.330   8.660  1.00  0.00           O
ATOM   3712  N   PRO A 532     106.540  36.550   9.890  1.00  0.00           N
ATOM   3713  CD  PRO A 532     106.730  35.140  10.120  1.00  0.00           C
ATOM   3714  HD1 PRO A 532     107.400  34.670   9.400  1.00  0.00           H
ATOM   3715  HD2 PRO A 532     105.730  34.750  10.300  1.00  0.00           H
ATOM   3716  CG  PRO A 532     107.400  35.140  11.500  1.00  0.00           C
ATOM   3717  HG1 PRO A 532     108.480  35.260  11.420  1.00  0.00           H
ATOM   3718  HG2 PRO A 532     107.080  34.190  11.910  1.00  0.00           H
ATOM   3719  CB  PRO A 532     106.790  36.410  12.200  1.00  0.00           C
ATOM   3720  HB1 PRO A 532     107.460  36.730  12.990  1.00  0.00           H
ATOM   3721  HB2 PRO A 532     105.790  36.240  12.590  1.00  0.00           H
ATOM   3722  CA  PRO A 532     106.630  37.370  11.040  1.00  0.00           C
ATOM   3723  HA  PRO A 532     105.660  37.860  11.180  1.00  0.00           H
ATOM   3724  C   PRO A 532     107.710  38.470  11.100  1.00  0.00           C
ATOM   3725  O   PRO A 532     108.860  38.240  10.690  1.00  0.00           O
ATOM   3726  N   PRO A 533     107.280  39.600  11.670  1.00  0.00           N
ATOM   3727  CD  PRO A 533     106.140  39.850  12.590  1.00  0.00           C
ATOM   3728  HD1 PRO A 533     106.090  39.140  13.420  1.00  0.00           H
ATOM   3729  HD2 PRO A 533     105.250  39.810  11.970  1.00  0.00           H
ATOM   3730  CG  PRO A 533     106.240  41.320  13.100  1.00  0.00           C
ATOM   3731  HG1 PRO A 533     106.780  41.350  14.040  1.00  0.00           H
ATOM   3732  HG2 PRO A 533     105.320  41.910  13.120  1.00  0.00           H
ATOM   3733  CB  PRO A 533     107.130  42.020  11.990  1.00  0.00           C
ATOM   3734  HB1 PRO A 533     107.580  42.920  12.410  1.00  0.00           H
ATOM   3735  HB2 PRO A 533     106.420  42.200  11.180  1.00  0.00           H
ATOM   3736  CA  PRO A 533     108.100  40.820  11.550  1.00  0.00           C
ATOM   3737  HA  PRO A 533     108.380  41.040  10.520  1.00  0.00           H
ATOM   3738  C   PRO A 533     109.360  40.810  12.400  1.00  0.00           C
ATOM   3739  O   PRO A 533     109.400  40.090  13.370  1.00  0.00           O
ATOM   3740  N   ARG A 534     110.450  41.490  12.060  1.00  0.00           N
ATOM   3741  H   ARG A 534     110.300  42.080  11.250  1.00  0.00           H
ATOM   3742  CA  ARG A 534     111.770  41.550  12.720  1.00  0.00           C
ATOM   3743  HA  ARG A 534     111.690  41.280  13.780  1.00  0.00           H
ATOM   3744  CB  ARG A 534     112.580  40.420  12.030  1.00  0.00           C
ATOM   3745  HB1 ARG A 534     113.570  40.560  12.470  1.00  0.00           H
ATOM   3746  HB2 ARG A 534     112.610  40.670  10.970  1.00  0.00           H
ATOM   3747  CG  ARG A 534     112.140  38.950  12.300  1.00  0.00           C
ATOM   3748  HG1 ARG A 534     112.630  38.230  11.640  1.00  0.00           H
ATOM   3749  HG2 ARG A 534     111.100  38.890  12.000  1.00  0.00           H
ATOM   3750  CD  ARG A 534     112.360  38.530  13.810  1.00  0.00           C
ATOM   3751  HD1 ARG A 534     111.630  39.140  14.350  1.00  0.00           H
ATOM   3752  HD2 ARG A 534     113.400  38.660  14.120  1.00  0.00           H
ATOM   3753  NE  ARG A 534     112.030  37.070  14.100  1.00  0.00           N
ATOM   3754  HE  ARG A 534     112.820  36.460  14.290  1.00  0.00           H
ATOM   3755  CZ  ARG A 534     110.990  36.720  14.730  1.00  0.00           C
ATOM   3756  NH1 ARG A 534     110.900  35.670  15.500  1.00  0.00           N
ATOM   3757 1HH1 ARG A 534     111.700  35.050  15.490  1.00  0.00           H
ATOM   3758 2HH1 ARG A 534     110.020  35.460  15.960  1.00  0.00           H
ATOM   3759  NH2 ARG A 534     109.920  37.470  14.710  1.00  0.00           N
ATOM   3760 1HH2 ARG A 534     109.870  38.210  14.030  1.00  0.00           H
ATOM   3761 2HH2 ARG A 534     109.190  37.170  15.340  1.00  0.00           H
ATOM   3762  C   ARG A 534     112.410  42.960  12.620  1.00  0.00           C
ATOM   3763  O   ARG A 534     111.920  43.810  11.880  1.00  0.00           O
ATOM   3764  N   LEU A 535     113.460  43.260  13.430  1.00  0.00           N
ATOM   3765  H   LEU A 535     113.830  42.540  14.030  1.00  0.00           H
ATOM   3766  CA  LEU A 535     114.220  44.500  13.350  1.00  0.00           C
ATOM   3767  HA  LEU A 535     113.560  45.350  13.550  1.00  0.00           H
ATOM   3768  CB  LEU A 535     115.240  44.590  14.550  1.00  0.00           C
ATOM   3769  HB1 LEU A 535     115.900  45.430  14.360  1.00  0.00           H
ATOM   3770  HB2 LEU A 535     115.850  43.690  14.460  1.00  0.00           H
ATOM   3771  CG  LEU A 535     114.690  44.790  15.960  1.00  0.00           C
ATOM   3772  HG  LEU A 535     114.130  43.910  16.270  1.00  0.00           H
ATOM   3773  CD1 LEU A 535     115.880  44.720  16.940  1.00  0.00           C
ATOM   3774 1HD1 LEU A 535     115.680  45.160  17.910  1.00  0.00           H
ATOM   3775 2HD1 LEU A 535     116.130  43.660  17.050  1.00  0.00           H
ATOM   3776 3HD1 LEU A 535     116.670  45.300  16.450  1.00  0.00           H
ATOM   3777  CD2 LEU A 535     113.940  46.120  16.080  1.00  0.00           C
ATOM   3778 1HD2 LEU A 535     114.580  46.970  15.870  1.00  0.00           H
ATOM   3779 2HD2 LEU A 535     113.160  46.290  15.330  1.00  0.00           H
ATOM   3780 3HD2 LEU A 535     113.400  46.130  17.020  1.00  0.00           H
ATOM   3781  C   LEU A 535     114.930  44.660  11.990  1.00  0.00           C
ATOM   3782  O   LEU A 535     115.430  43.650  11.470  1.00  0.00           O
ATOM   3783  N   LYS A 536     114.910  45.830  11.430  1.00  0.00           N
ATOM   3784  H   LYS A 536     114.400  46.630  11.780  1.00  0.00           H
ATOM   3785  CA  LYS A 536     115.670  46.220  10.240  1.00  0.00           C
ATOM   3786  HA  LYS A 536     115.540  45.500   9.430  1.00  0.00           H
ATOM   3787  CB  LYS A 536     115.090  47.550   9.690  1.00  0.00           C
ATOM   3788  HB1 LYS A 536     115.610  47.740   8.750  1.00  0.00           H
ATOM   3789  HB2 LYS A 536     115.380  48.390  10.320  1.00  0.00           H
ATOM   3790  CG  LYS A 536     113.550  47.570   9.560  1.00  0.00           C
ATOM   3791  HG1 LYS A 536     113.050  47.320  10.500  1.00  0.00           H
ATOM   3792  HG2 LYS A 536     113.270  46.870   8.780  1.00  0.00           H
ATOM   3793  CD  LYS A 536     112.980  48.980   9.180  1.00  0.00           C
ATOM   3794  HD1 LYS A 536     111.910  48.970   8.990  1.00  0.00           H
ATOM   3795  HD2 LYS A 536     113.430  49.270   8.230  1.00  0.00           H
ATOM   3796  CE  LYS A 536     113.240  49.850  10.360  1.00  0.00           C
ATOM   3797  HE1 LYS A 536     114.310  49.790  10.580  1.00  0.00           H
ATOM   3798  HE2 LYS A 536     112.630  49.400  11.140  1.00  0.00           H
ATOM   3799  NZ  LYS A 536     112.770  51.230  10.150  1.00  0.00           N
ATOM   3800  HZ1 LYS A 536     113.500  51.670   9.610  1.00  0.00           H
ATOM   3801  HZ2 LYS A 536     111.870  51.280   9.690  1.00  0.00           H
ATOM   3802  HZ3 LYS A 536     112.630  51.580  11.090  1.00  0.00           H
ATOM   3803  C   LYS A 536     117.130  46.340  10.470  1.00  0.00           C
ATOM   3804  O   LYS A 536     117.900  46.070   9.590  1.00  0.00           O
ATOM   3805  N   ASN A 537     117.610  46.790  11.600  1.00  0.00           N
ATOM   3806  H   ASN A 537     116.900  47.060  12.260  1.00  0.00           H
ATOM   3807  CA  ASN A 537     118.960  47.060  11.970  1.00  0.00           C
ATOM   3808  HA  ASN A 537     119.590  46.940  11.090  1.00  0.00           H
ATOM   3809  CB  ASN A 537     119.130  48.590  12.260  1.00  0.00           C
ATOM   3810  HB1 ASN A 537     118.630  48.930  13.170  1.00  0.00           H
ATOM   3811  HB2 ASN A 537     118.820  49.090  11.350  1.00  0.00           H
ATOM   3812  CG  ASN A 537     120.590  48.850  12.600  1.00  0.00           C
ATOM   3813  OD1 ASN A 537     121.150  48.290  13.580  1.00  0.00           O
ATOM   3814  ND2 ASN A 537     121.230  49.810  11.900  1.00  0.00           N
ATOM   3815 1HD2 ASN A 537     120.880  50.250  11.060  1.00  0.00           H
ATOM   3816 2HD2 ASN A 537     122.210  49.990  12.060  1.00  0.00           H
ATOM   3817  C   ASN A 537     119.340  46.110  13.170  1.00  0.00           C
ATOM   3818  O   ASN A 537     118.700  46.060  14.200  1.00  0.00           O
ATOM   3819  N   LEU A 538     120.490  45.500  13.030  1.00  0.00           N
ATOM   3820  H   LEU A 538     121.150  45.780  12.320  1.00  0.00           H
ATOM   3821  CA  LEU A 538     120.900  44.390  13.940  1.00  0.00           C
ATOM   3822  HA  LEU A 538     120.230  44.100  14.740  1.00  0.00           H
ATOM   3823  CB  LEU A 538     121.050  43.070  13.130  1.00  0.00           C
ATOM   3824  HB1 LEU A 538     121.340  42.310  13.840  1.00  0.00           H
ATOM   3825  HB2 LEU A 538     121.770  43.300  12.340  1.00  0.00           H
ATOM   3826  CG  LEU A 538     119.800  42.450  12.460  1.00  0.00           C
ATOM   3827  HG  LEU A 538     119.420  43.210  11.770  1.00  0.00           H
ATOM   3828  CD1 LEU A 538     120.280  41.280  11.540  1.00  0.00           C
ATOM   3829 1HD1 LEU A 538     120.540  40.500  12.260  1.00  0.00           H
ATOM   3830 2HD1 LEU A 538     119.410  41.010  10.950  1.00  0.00           H
ATOM   3831 3HD1 LEU A 538     121.170  41.560  10.980  1.00  0.00           H
ATOM   3832  CD2 LEU A 538     118.740  42.150  13.480  1.00  0.00           C
ATOM   3833 1HD2 LEU A 538     117.860  41.700  13.020  1.00  0.00           H
ATOM   3834 2HD2 LEU A 538     119.140  41.380  14.150  1.00  0.00           H
ATOM   3835 3HD2 LEU A 538     118.450  43.060  14.000  1.00  0.00           H
ATOM   3836  C   LEU A 538     122.220  44.790  14.580  1.00  0.00           C
ATOM   3837  O   LEU A 538     122.650  44.070  15.470  1.00  0.00           O
ATOM   3838  N   HIS A 539     122.900  45.770  14.060  1.00  0.00           N
ATOM   3839  H   HIS A 539     122.480  46.350  13.350  1.00  0.00           H
ATOM   3840  CA  HIS A 539     124.180  46.190  14.740  1.00  0.00           C
ATOM   3841  HA  HIS A 539     124.580  45.390  15.370  1.00  0.00           H
ATOM   3842  CB  HIS A 539     125.090  46.610  13.600  1.00  0.00           C
ATOM   3843  HB1 HIS A 539     125.980  47.030  14.080  1.00  0.00           H
ATOM   3844  HB2 HIS A 539     124.600  47.310  12.920  1.00  0.00           H
ATOM   3845  CG  HIS A 539     125.690  45.520  12.750  1.00  0.00           C
ATOM   3846  ND1 HIS A 539     125.130  44.320  12.490  1.00  0.00           N
ATOM   3847  CE1 HIS A 539     126.060  43.480  11.980  1.00  0.00           C
ATOM   3848  HE1 HIS A 539     125.950  42.410  11.870  1.00  0.00           H
ATOM   3849  NE2 HIS A 539     127.190  44.200  11.780  1.00  0.00           N
ATOM   3850  HE2 HIS A 539     128.060  43.840  11.420  1.00  0.00           H
ATOM   3851  CD2 HIS A 539     126.960  45.530  12.300  1.00  0.00           C
ATOM   3852  HD2 HIS A 539     127.720  46.270  12.480  1.00  0.00           H
ATOM   3853  C   HIS A 539     124.070  47.320  15.790  1.00  0.00           C
ATOM   3854  O   HIS A 539     125.040  47.650  16.390  1.00  0.00           O
ATOM   3855  N   LYS A 540     122.900  47.970  15.970  1.00  0.00           N
ATOM   3856  H   LYS A 540     122.090  47.730  15.420  1.00  0.00           H
ATOM   3857  CA  LYS A 540     122.530  48.960  17.040  1.00  0.00           C
ATOM   3858  HA  LYS A 540     123.390  49.430  17.500  1.00  0.00           H
ATOM   3859  CB  LYS A 540     121.540  49.950  16.460  1.00  0.00           C
ATOM   3860  HB1 LYS A 540     121.150  50.570  17.280  1.00  0.00           H
ATOM   3861  HB2 LYS A 540     120.830  49.350  15.890  1.00  0.00           H
ATOM   3862  CG  LYS A 540     122.240  50.910  15.550  1.00  0.00           C
ATOM   3863  HG1 LYS A 540     122.720  50.370  14.740  1.00  0.00           H
ATOM   3864  HG2 LYS A 540     123.050  51.320  16.150  1.00  0.00           H
ATOM   3865  CD  LYS A 540     121.300  52.070  15.070  1.00  0.00           C
ATOM   3866  HD1 LYS A 540     120.880  52.580  15.930  1.00  0.00           H
ATOM   3867  HD2 LYS A 540     120.460  51.550  14.620  1.00  0.00           H
ATOM   3868  CE  LYS A 540     121.960  52.950  13.930  1.00  0.00           C
ATOM   3869  HE1 LYS A 540     121.200  53.570  13.450  1.00  0.00           H
ATOM   3870  HE2 LYS A 540     122.300  52.260  13.150  1.00  0.00           H
ATOM   3871  NZ  LYS A 540     123.130  53.720  14.450  1.00  0.00           N
ATOM   3872  HZ1 LYS A 540     123.490  54.350  13.750  1.00  0.00           H
ATOM   3873  HZ2 LYS A 540     122.880  54.260  15.260  1.00  0.00           H
ATOM   3874  HZ3 LYS A 540     123.900  53.110  14.680  1.00  0.00           H
ATOM   3875  C   LYS A 540     121.830  48.370  18.230  1.00  0.00           C
ATOM   3876  O   LYS A 540     121.360  49.100  19.090  1.00  0.00           O
ATOM   3877  N   VAL A 541     121.820  47.040  18.360  1.00  0.00           N
ATOM   3878  H   VAL A 541     122.440  46.570  17.710  1.00  0.00           H
ATOM   3879  CA  VAL A 541     121.220  46.260  19.450  1.00  0.00           C
ATOM   3880  HA  VAL A 541     121.030  46.970  20.250  1.00  0.00           H
ATOM   3881  CB  VAL A 541     119.830  45.720  19.030  1.00  0.00           C
ATOM   3882  HB  VAL A 541     119.650  45.040  19.870  1.00  0.00           H
ATOM   3883  CG1 VAL A 541     118.830  46.880  19.020  1.00  0.00           C
ATOM   3884 1HG1 VAL A 541     117.850  46.520  18.710  1.00  0.00           H
ATOM   3885 2HG1 VAL A 541     118.940  47.360  19.990  1.00  0.00           H
ATOM   3886 3HG1 VAL A 541     119.140  47.560  18.230  1.00  0.00           H
ATOM   3887  CG2 VAL A 541     119.870  45.020  17.690  1.00  0.00           C
ATOM   3888 1HG2 VAL A 541     120.840  44.530  17.610  1.00  0.00           H
ATOM   3889 2HG2 VAL A 541     119.000  44.360  17.700  1.00  0.00           H
ATOM   3890 3HG2 VAL A 541     119.840  45.860  16.990  1.00  0.00           H
ATOM   3891  C   VAL A 541     121.940  45.010  19.900  1.00  0.00           C
ATOM   3892  O   VAL A 541     122.690  44.290  19.180  1.00  0.00           O
ATOM   3893  N   SER A 542     121.840  44.720  21.180  1.00  0.00           N
ATOM   3894  H   SER A 542     121.290  45.390  21.700  1.00  0.00           H
ATOM   3895  CA  SER A 542     122.550  43.560  21.890  1.00  0.00           C
ATOM   3896  HA  SER A 542     123.540  43.480  21.430  1.00  0.00           H
ATOM   3897  CB  SER A 542     122.780  43.840  23.370  1.00  0.00           C
ATOM   3898  HB1 SER A 542     123.320  43.000  23.800  1.00  0.00           H
ATOM   3899  HB2 SER A 542     121.850  43.930  23.950  1.00  0.00           H
ATOM   3900  OG  SER A 542     123.490  45.100  23.630  1.00  0.00           O
ATOM   3901  HG  SER A 542     122.850  45.760  23.340  1.00  0.00           H
ATOM   3902  C   SER A 542     121.880  42.180  21.670  1.00  0.00           C
ATOM   3903  O   SER A 542     120.680  42.090  21.800  1.00  0.00           O
ATOM   3904  N   PRO A 543     122.670  41.030  21.610  1.00  0.00           N
ATOM   3905  CD  PRO A 543     124.140  41.000  21.490  1.00  0.00           C
ATOM   3906  HD1 PRO A 543     124.650  41.180  22.430  1.00  0.00           H
ATOM   3907  HD2 PRO A 543     124.540  41.770  20.830  1.00  0.00           H
ATOM   3908  CG  PRO A 543     124.520  39.710  20.980  1.00  0.00           C
ATOM   3909  HG1 PRO A 543     125.460  39.380  21.440  1.00  0.00           H
ATOM   3910  HG2 PRO A 543     124.610  39.770  19.890  1.00  0.00           H
ATOM   3911  CB  PRO A 543     123.390  38.820  21.490  1.00  0.00           C
ATOM   3912  HB1 PRO A 543     123.500  38.740  22.570  1.00  0.00           H
ATOM   3913  HB2 PRO A 543     123.370  37.890  20.910  1.00  0.00           H
ATOM   3914  CA  PRO A 543     122.170  39.720  21.290  1.00  0.00           C
ATOM   3915  HA  PRO A 543     121.940  39.590  20.230  1.00  0.00           H
ATOM   3916  C   PRO A 543     121.040  39.200  22.210  1.00  0.00           C
ATOM   3917  O   PRO A 543     120.230  38.380  21.730  1.00  0.00           O
ATOM   3918  N   SER A 544     120.890  39.740  23.380  1.00  0.00           N
ATOM   3919  H   SER A 544     121.740  40.170  23.730  1.00  0.00           H
ATOM   3920  CA  SER A 544     119.780  39.490  24.290  1.00  0.00           C
ATOM   3921  HA  SER A 544     119.540  38.430  24.310  1.00  0.00           H
ATOM   3922  CB  SER A 544     120.240  39.720  25.700  1.00  0.00           C
ATOM   3923  HB1 SER A 544     121.070  39.060  25.970  1.00  0.00           H
ATOM   3924  HB2 SER A 544     119.350  39.470  26.290  1.00  0.00           H
ATOM   3925  OG  SER A 544     120.620  41.040  25.950  1.00  0.00           O
ATOM   3926  HG  SER A 544     120.520  41.370  26.850  1.00  0.00           H
ATOM   3927  C   SER A 544     118.500  40.290  23.980  1.00  0.00           C
ATOM   3928  O   SER A 544     117.390  39.740  24.060  1.00  0.00           O
ATOM   3929  N   LEU A 545     118.620  41.580  23.610  1.00  0.00           N
ATOM   3930  H   LEU A 545     119.600  41.840  23.530  1.00  0.00           H
ATOM   3931  CA  LEU A 545     117.500  42.360  22.980  1.00  0.00           C
ATOM   3932  HA  LEU A 545     116.710  42.400  23.740  1.00  0.00           H
ATOM   3933  CB  LEU A 545     117.990  43.810  22.730  1.00  0.00           C
ATOM   3934  HB1 LEU A 545     118.770  43.700  21.970  1.00  0.00           H
ATOM   3935  HB2 LEU A 545     118.410  44.220  23.650  1.00  0.00           H
ATOM   3936  CG  LEU A 545     116.980  44.890  22.350  1.00  0.00           C
ATOM   3937  HG  LEU A 545     117.570  45.800  22.230  1.00  0.00           H
ATOM   3938  CD1 LEU A 545     116.390  44.690  20.940  1.00  0.00           C
ATOM   3939 1HD1 LEU A 545     117.170  44.610  20.180  1.00  0.00           H
ATOM   3940 2HD1 LEU A 545     115.660  43.890  20.860  1.00  0.00           H
ATOM   3941 3HD1 LEU A 545     115.880  45.600  20.610  1.00  0.00           H
ATOM   3942  CD2 LEU A 545     115.830  45.200  23.290  1.00  0.00           C
ATOM   3943 1HD2 LEU A 545     115.170  44.340  23.400  1.00  0.00           H
ATOM   3944 2HD2 LEU A 545     116.210  45.500  24.270  1.00  0.00           H
ATOM   3945 3HD2 LEU A 545     115.220  46.040  22.960  1.00  0.00           H
ATOM   3946  C   LEU A 545     116.940  41.730  21.710  1.00  0.00           C
ATOM   3947  O   LEU A 545     115.710  41.540  21.640  1.00  0.00           O
ATOM   3948  N   LYS A 546     117.790  41.210  20.860  1.00  0.00           N
ATOM   3949  H   LYS A 546     118.720  41.590  20.880  1.00  0.00           H
ATOM   3950  CA  LYS A 546     117.510  40.340  19.650  1.00  0.00           C
ATOM   3951  HA  LYS A 546     116.770  40.850  19.030  1.00  0.00           H
ATOM   3952  CB  LYS A 546     118.800  40.150  18.740  1.00  0.00           C
ATOM   3953  HB1 LYS A 546     118.590  39.380  18.000  1.00  0.00           H
ATOM   3954  HB2 LYS A 546     119.610  39.810  19.390  1.00  0.00           H
ATOM   3955  CG  LYS A 546     119.210  41.380  18.010  1.00  0.00           C
ATOM   3956  HG1 LYS A 546     119.260  42.160  18.770  1.00  0.00           H
ATOM   3957  HG2 LYS A 546     118.480  41.620  17.230  1.00  0.00           H
ATOM   3958  CD  LYS A 546     120.510  41.390  17.230  1.00  0.00           C
ATOM   3959  HD1 LYS A 546     120.380  42.030  16.350  1.00  0.00           H
ATOM   3960  HD2 LYS A 546     120.640  40.410  16.770  1.00  0.00           H
ATOM   3961  CE  LYS A 546     121.820  41.660  18.020  1.00  0.00           C
ATOM   3962  HE1 LYS A 546     121.920  40.960  18.850  1.00  0.00           H
ATOM   3963  HE2 LYS A 546     121.590  42.580  18.540  1.00  0.00           H
ATOM   3964  NZ  LYS A 546     122.970  41.720  17.140  1.00  0.00           N
ATOM   3965  HZ1 LYS A 546     122.860  42.340  16.350  1.00  0.00           H
ATOM   3966  HZ2 LYS A 546     123.770  42.070  17.650  1.00  0.00           H
ATOM   3967  HZ3 LYS A 546     123.120  40.810  16.730  1.00  0.00           H
ATOM   3968  C   LYS A 546     116.790  39.030  19.930  1.00  0.00           C
ATOM   3969  O   LYS A 546     115.800  38.680  19.240  1.00  0.00           O
ATOM   3970  N   GLY A 547     117.170  38.330  21.050  1.00  0.00           N
ATOM   3971  H   GLY A 547     117.920  38.730  21.590  1.00  0.00           H
ATOM   3972  CA  GLY A 547     116.530  37.080  21.680  1.00  0.00           C
ATOM   3973  HA1 GLY A 547     117.090  36.490  22.400  1.00  0.00           H
ATOM   3974  HA2 GLY A 547     116.420  36.320  20.910  1.00  0.00           H
ATOM   3975  C   GLY A 547     115.100  37.390  22.220  1.00  0.00           C
ATOM   3976  O   GLY A 547     114.220  36.590  21.910  1.00  0.00           O
ATOM   3977  N   PHE A 548     114.970  38.560  22.910  1.00  0.00           N
ATOM   3978  H   PHE A 548     115.810  39.100  23.090  1.00  0.00           H
ATOM   3979  CA  PHE A 548     113.640  39.030  23.450  1.00  0.00           C
ATOM   3980  HA  PHE A 548     113.310  38.130  23.980  1.00  0.00           H
ATOM   3981  CB  PHE A 548     113.840  40.160  24.490  1.00  0.00           C
ATOM   3982  HB1 PHE A 548     114.170  41.030  23.910  1.00  0.00           H
ATOM   3983  HB2 PHE A 548     114.680  39.820  25.080  1.00  0.00           H
ATOM   3984  CG  PHE A 548     112.690  40.310  25.440  1.00  0.00           C
ATOM   3985  CD1 PHE A 548     112.570  39.470  26.540  1.00  0.00           C
ATOM   3986  HD1 PHE A 548     113.200  38.600  26.660  1.00  0.00           H
ATOM   3987  CE1 PHE A 548     111.620  39.760  27.570  1.00  0.00           C
ATOM   3988  HE1 PHE A 548     111.530  39.190  28.490  1.00  0.00           H
ATOM   3989  CZ  PHE A 548     110.700  40.720  27.370  1.00  0.00           C
ATOM   3990  HZ  PHE A 548     109.870  40.800  28.050  1.00  0.00           H
ATOM   3991  CE2 PHE A 548     110.750  41.560  26.220  1.00  0.00           C
ATOM   3992  HE2 PHE A 548     110.020  42.350  26.120  1.00  0.00           H
ATOM   3993  CD2 PHE A 548     111.850  41.440  25.380  1.00  0.00           C
ATOM   3994  HD2 PHE A 548     112.020  42.150  24.590  1.00  0.00           H
ATOM   3995  C   PHE A 548     112.610  39.190  22.350  1.00  0.00           C
ATOM   3996  O   PHE A 548     111.430  38.710  22.450  1.00  0.00           O
ATOM   3997  N   LEU A 549     113.060  39.860  21.270  1.00  0.00           N
ATOM   3998  H   LEU A 549     114.010  40.220  21.250  1.00  0.00           H
ATOM   3999  CA  LEU A 549     112.280  40.060  20.100  1.00  0.00           C
ATOM   4000  HA  LEU A 549     111.390  40.550  20.480  1.00  0.00           H
ATOM   4001  CB  LEU A 549     113.010  41.110  19.210  1.00  0.00           C
ATOM   4002  HB1 LEU A 549     114.020  40.790  18.940  1.00  0.00           H
ATOM   4003  HB2 LEU A 549     113.260  41.960  19.850  1.00  0.00           H
ATOM   4004  CG  LEU A 549     112.230  41.810  18.110  1.00  0.00           C
ATOM   4005  HG  LEU A 549     112.740  42.750  17.890  1.00  0.00           H
ATOM   4006  CD1 LEU A 549     112.150  40.990  16.840  1.00  0.00           C
ATOM   4007 1HD1 LEU A 549     111.530  40.100  16.910  1.00  0.00           H
ATOM   4008 2HD1 LEU A 549     111.610  41.570  16.100  1.00  0.00           H
ATOM   4009 3HD1 LEU A 549     113.080  40.600  16.430  1.00  0.00           H
ATOM   4010  CD2 LEU A 549     110.850  42.240  18.550  1.00  0.00           C
ATOM   4011 1HD2 LEU A 549     110.950  42.840  19.460  1.00  0.00           H
ATOM   4012 2HD2 LEU A 549     110.410  42.960  17.860  1.00  0.00           H
ATOM   4013 3HD2 LEU A 549     110.130  41.470  18.820  1.00  0.00           H
ATOM   4014  C   LEU A 549     111.820  38.810  19.370  1.00  0.00           C
ATOM   4015  O   LEU A 549     110.630  38.660  19.020  1.00  0.00           O
ATOM   4016  N   ASP A 550     112.710  37.820  19.230  1.00  0.00           N
ATOM   4017  H   ASP A 550     113.620  37.850  19.660  1.00  0.00           H
ATOM   4018  CA  ASP A 550     112.440  36.580  18.480  1.00  0.00           C
ATOM   4019  HA  ASP A 550     111.870  36.890  17.600  1.00  0.00           H
ATOM   4020  CB  ASP A 550     113.840  36.030  18.110  1.00  0.00           C
ATOM   4021  HB1 ASP A 550     114.360  35.730  19.020  1.00  0.00           H
ATOM   4022  HB2 ASP A 550     114.440  36.780  17.610  1.00  0.00           H
ATOM   4023  CG  ASP A 550     113.790  34.850  17.200  1.00  0.00           C
ATOM   4024  OD1 ASP A 550     113.920  33.730  17.690  1.00  0.00           O
ATOM   4025  OD2 ASP A 550     113.600  35.000  15.970  1.00  0.00           O
ATOM   4026  C   ASP A 550     111.600  35.600  19.300  1.00  0.00           C
ATOM   4027  O   ASP A 550     110.770  34.830  18.730  1.00  0.00           O
ATOM   4028  N   ARG A 551     111.830  35.650  20.630  1.00  0.00           N
ATOM   4029  H   ARG A 551     112.690  36.090  20.920  1.00  0.00           H
ATOM   4030  CA  ARG A 551     111.020  34.850  21.650  1.00  0.00           C
ATOM   4031  HA  ARG A 551     110.800  33.890  21.180  1.00  0.00           H
ATOM   4032  CB  ARG A 551     111.930  34.600  22.900  1.00  0.00           C
ATOM   4033  HB1 ARG A 551     111.980  35.530  23.480  1.00  0.00           H
ATOM   4034  HB2 ARG A 551     112.930  34.410  22.520  1.00  0.00           H
ATOM   4035  CG  ARG A 551     111.330  33.510  23.780  1.00  0.00           C
ATOM   4036  HG1 ARG A 551     110.290  33.750  23.960  1.00  0.00           H
ATOM   4037  HG2 ARG A 551     111.880  33.660  24.710  1.00  0.00           H
ATOM   4038  CD  ARG A 551     111.420  32.110  23.130  1.00  0.00           C
ATOM   4039  HD1 ARG A 551     112.480  31.830  23.160  1.00  0.00           H
ATOM   4040  HD2 ARG A 551     111.100  32.100  22.090  1.00  0.00           H
ATOM   4041  NE  ARG A 551     110.660  31.120  23.870  1.00  0.00           N
ATOM   4042  HE  ARG A 551     111.040  30.820  24.760  1.00  0.00           H
ATOM   4043  CZ  ARG A 551     109.470  30.700  23.580  1.00  0.00           C
ATOM   4044  NH1 ARG A 551     108.980  30.660  22.330  1.00  0.00           N
ATOM   4045 1HH1 ARG A 551     109.670  30.650  21.600  1.00  0.00           H
ATOM   4046 2HH1 ARG A 551     108.100  30.170  22.230  1.00  0.00           H
ATOM   4047  NH2 ARG A 551     108.730  30.110  24.520  1.00  0.00           N
ATOM   4048 1HH2 ARG A 551     109.120  29.980  25.440  1.00  0.00           H
ATOM   4049 2HH2 ARG A 551     107.870  29.600  24.390  1.00  0.00           H
ATOM   4050  C   ARG A 551     109.630  35.480  21.920  1.00  0.00           C
ATOM   4051  O   ARG A 551     108.710  34.700  22.310  1.00  0.00           O
ATOM   4052  N   LEU A 552     109.530  36.800  21.850  1.00  0.00           N
ATOM   4053  H   LEU A 552     110.380  37.350  21.800  1.00  0.00           H
ATOM   4054  CA  LEU A 552     108.200  37.420  21.880  1.00  0.00           C
ATOM   4055  HA  LEU A 552     107.610  36.860  22.610  1.00  0.00           H
ATOM   4056  CB  LEU A 552     108.320  38.940  22.030  1.00  0.00           C
ATOM   4057  HB1 LEU A 552     107.410  39.450  21.710  1.00  0.00           H
ATOM   4058  HB2 LEU A 552     108.990  39.340  21.260  1.00  0.00           H
ATOM   4059  CG  LEU A 552     108.680  39.320  23.460  1.00  0.00           C
ATOM   4060  HG  LEU A 552     109.510  38.720  23.830  1.00  0.00           H
ATOM   4061  CD1 LEU A 552     109.140  40.780  23.560  1.00  0.00           C
ATOM   4062 1HD1 LEU A 552     108.490  41.420  22.970  1.00  0.00           H
ATOM   4063 2HD1 LEU A 552     109.100  41.040  24.620  1.00  0.00           H
ATOM   4064 3HD1 LEU A 552     110.150  41.010  23.210  1.00  0.00           H
ATOM   4065  CD2 LEU A 552     107.440  39.080  24.360  1.00  0.00           C
ATOM   4066 1HD2 LEU A 552     106.610  39.740  24.130  1.00  0.00           H
ATOM   4067 2HD2 LEU A 552     107.250  38.020  24.210  1.00  0.00           H
ATOM   4068 3HD2 LEU A 552     107.680  39.220  25.410  1.00  0.00           H
ATOM   4069  C   LEU A 552     107.450  37.140  20.520  1.00  0.00           C
ATOM   4070  O   LEU A 552     106.340  36.570  20.590  1.00  0.00           O
ATOM   4071  N   LEU A 553     108.020  37.470  19.380  1.00  0.00           N
ATOM   4072  H   LEU A 553     108.920  37.940  19.360  1.00  0.00           H
ATOM   4073  CA  LEU A 553     107.430  37.410  18.070  1.00  0.00           C
ATOM   4074  HA  LEU A 553     106.350  37.470  18.190  1.00  0.00           H
ATOM   4075  CB  LEU A 553     107.950  38.530  17.170  1.00  0.00           C
ATOM   4076  HB1 LEU A 553     107.510  38.290  16.210  1.00  0.00           H
ATOM   4077  HB2 LEU A 553     109.030  38.420  17.090  1.00  0.00           H
ATOM   4078  CG  LEU A 553     107.590  39.940  17.620  1.00  0.00           C
ATOM   4079  HG  LEU A 553     108.020  40.130  18.610  1.00  0.00           H
ATOM   4080  CD1 LEU A 553     108.130  40.970  16.650  1.00  0.00           C
ATOM   4081 1HD1 LEU A 553     108.000  40.570  15.650  1.00  0.00           H
ATOM   4082 2HD1 LEU A 553     107.730  41.960  16.900  1.00  0.00           H
ATOM   4083 3HD1 LEU A 553     109.160  41.250  16.870  1.00  0.00           H
ATOM   4084  CD2 LEU A 553     106.040  39.980  17.660  1.00  0.00           C
ATOM   4085 1HD2 LEU A 553     105.760  41.020  17.790  1.00  0.00           H
ATOM   4086 2HD2 LEU A 553     105.480  39.550  16.820  1.00  0.00           H
ATOM   4087 3HD2 LEU A 553     105.820  39.500  18.610  1.00  0.00           H
ATOM   4088  C   LEU A 553     107.620  36.030  17.390  1.00  0.00           C
ATOM   4089  O   LEU A 553     108.320  35.860  16.400  1.00  0.00           O
ATOM   4090  N   VAL A 554     106.770  35.160  17.980  1.00  0.00           N
ATOM   4091  H   VAL A 554     106.190  35.600  18.680  1.00  0.00           H
ATOM   4092  CA  VAL A 554     106.430  33.810  17.490  1.00  0.00           C
ATOM   4093  HA  VAL A 554     107.160  33.390  16.790  1.00  0.00           H
ATOM   4094  CB  VAL A 554     106.430  32.830  18.680  1.00  0.00           C
ATOM   4095  HB  VAL A 554     105.490  32.790  19.220  1.00  0.00           H
ATOM   4096  CG1 VAL A 554     106.750  31.440  18.040  1.00  0.00           C
ATOM   4097 1HG1 VAL A 554     106.930  30.770  18.880  1.00  0.00           H
ATOM   4098 2HG1 VAL A 554     105.880  31.190  17.430  1.00  0.00           H
ATOM   4099 3HG1 VAL A 554     107.680  31.450  17.470  1.00  0.00           H
ATOM   4100  CG2 VAL A 554     107.700  33.120  19.590  1.00  0.00           C
ATOM   4101 1HG2 VAL A 554     108.010  32.260  20.190  1.00  0.00           H
ATOM   4102 2HG2 VAL A 554     108.560  33.520  19.040  1.00  0.00           H
ATOM   4103 3HG2 VAL A 554     107.340  33.870  20.290  1.00  0.00           H
ATOM   4104  C   VAL A 554     105.110  33.850  16.750  1.00  0.00           C
ATOM   4105  O   VAL A 554     104.120  34.230  17.340  1.00  0.00           O
ATOM   4106  N   ARG A 555     105.050  33.370  15.510  1.00  0.00           N
ATOM   4107  H   ARG A 555     105.900  33.130  15.030  1.00  0.00           H
ATOM   4108  CA  ARG A 555     103.770  33.370  14.740  1.00  0.00           C
ATOM   4109  HA  ARG A 555     103.200  34.290  14.860  1.00  0.00           H
ATOM   4110  CB  ARG A 555     104.040  33.010  13.220  1.00  0.00           C
ATOM   4111  HB1 ARG A 555     104.400  31.990  13.100  1.00  0.00           H
ATOM   4112  HB2 ARG A 555     104.810  33.650  12.810  1.00  0.00           H
ATOM   4113  CG  ARG A 555     102.870  33.300  12.350  1.00  0.00           C
ATOM   4114  HG1 ARG A 555     102.630  34.360  12.280  1.00  0.00           H
ATOM   4115  HG2 ARG A 555     101.990  32.790  12.740  1.00  0.00           H
ATOM   4116  CD  ARG A 555     102.920  32.740  10.910  1.00  0.00           C
ATOM   4117  HD1 ARG A 555     103.780  33.200  10.410  1.00  0.00           H
ATOM   4118  HD2 ARG A 555     102.070  33.180  10.390  1.00  0.00           H
ATOM   4119  NE  ARG A 555     103.120  31.270  10.770  1.00  0.00           N
ATOM   4120  HE  ARG A 555     104.050  30.920  10.920  1.00  0.00           H
ATOM   4121  CZ  ARG A 555     102.290  30.440  10.270  1.00  0.00           C
ATOM   4122  NH1 ARG A 555     101.110  30.760   9.890  1.00  0.00           N
ATOM   4123 1HH1 ARG A 555     100.830  31.690  10.170  1.00  0.00           H
ATOM   4124 2HH1 ARG A 555     100.660  30.090   9.290  1.00  0.00           H
ATOM   4125  NH2 ARG A 555     102.690  29.240  10.040  1.00  0.00           N
ATOM   4126 1HH2 ARG A 555     103.610  28.990  10.380  1.00  0.00           H
ATOM   4127 2HH2 ARG A 555     101.930  28.630   9.800  1.00  0.00           H
ATOM   4128  C   ARG A 555     102.750  32.360  15.370  1.00  0.00           C
ATOM   4129  O   ARG A 555     101.580  32.700  15.600  1.00  0.00           O
ATOM   4130  N   ASP A 556     103.200  31.110  15.620  1.00  0.00           N
ATOM   4131  H   ASP A 556     104.130  30.850  15.330  1.00  0.00           H
ATOM   4132  CA  ASP A 556     102.260  30.080  16.170  1.00  0.00           C
ATOM   4133  HA  ASP A 556     101.340  30.120  15.590  1.00  0.00           H
ATOM   4134  CB  ASP A 556     102.930  28.690  15.950  1.00  0.00           C
ATOM   4135  HB1 ASP A 556     103.890  28.660  16.470  1.00  0.00           H
ATOM   4136  HB2 ASP A 556     103.000  28.490  14.880  1.00  0.00           H
ATOM   4137  CG  ASP A 556     102.100  27.550  16.580  1.00  0.00           C
ATOM   4138  OD1 ASP A 556     102.780  26.570  17.040  1.00  0.00           O
ATOM   4139  OD2 ASP A 556     100.890  27.670  16.800  1.00  0.00           O
ATOM   4140  C   ASP A 556     101.920  30.290  17.720  1.00  0.00           C
ATOM   4141  O   ASP A 556     102.850  30.270  18.540  1.00  0.00           O
ATOM   4142  N   PRO A 557     100.650  30.410  18.090  1.00  0.00           N
ATOM   4143  CD  PRO A 557      99.510  30.510  17.150  1.00  0.00           C
ATOM   4144  HD1 PRO A 557      99.320  29.480  16.850  1.00  0.00           H
ATOM   4145  HD2 PRO A 557      99.630  31.160  16.280  1.00  0.00           H
ATOM   4146  CG  PRO A 557      98.390  31.090  17.950  1.00  0.00           C
ATOM   4147  HG1 PRO A 557      97.410  30.720  17.630  1.00  0.00           H
ATOM   4148  HG2 PRO A 557      98.430  32.170  17.810  1.00  0.00           H
ATOM   4149  CB  PRO A 557      98.720  30.590  19.380  1.00  0.00           C
ATOM   4150  HB1 PRO A 557      98.210  29.640  19.550  1.00  0.00           H
ATOM   4151  HB2 PRO A 557      98.310  31.200  20.190  1.00  0.00           H
ATOM   4152  CA  PRO A 557     100.200  30.480  19.460  1.00  0.00           C
ATOM   4153  HA  PRO A 557     100.560  31.320  20.050  1.00  0.00           H
ATOM   4154  C   PRO A 557     100.610  29.230  20.240  1.00  0.00           C
ATOM   4155  O   PRO A 557     100.800  29.430  21.440  1.00  0.00           O
ATOM   4156  N   ALA A 558     100.890  28.080  19.700  1.00  0.00           N
ATOM   4157  H   ALA A 558     100.650  27.950  18.730  1.00  0.00           H
ATOM   4158  CA  ALA A 558     101.350  26.930  20.500  1.00  0.00           C
ATOM   4159  HA  ALA A 558     100.860  26.930  21.470  1.00  0.00           H
ATOM   4160  CB  ALA A 558     100.880  25.640  19.840  1.00  0.00           C
ATOM   4161  HB1 ALA A 558     101.300  24.810  20.390  1.00  0.00           H
ATOM   4162  HB2 ALA A 558      99.790  25.550  19.890  1.00  0.00           H
ATOM   4163  HB3 ALA A 558     101.290  25.710  18.830  1.00  0.00           H
ATOM   4164  C   ALA A 558     102.880  26.860  20.710  1.00  0.00           C
ATOM   4165  O   ALA A 558     103.370  25.930  21.300  1.00  0.00           O
ATOM   4166  N   GLN A 559     103.680  27.870  20.310  1.00  0.00           N
ATOM   4167  H   GLN A 559     103.210  28.460  19.650  1.00  0.00           H
ATOM   4168  CA  GLN A 559     105.140  28.110  20.490  1.00  0.00           C
ATOM   4169  HA  GLN A 559     105.540  27.390  21.200  1.00  0.00           H
ATOM   4170  CB  GLN A 559     105.750  27.760  19.140  1.00  0.00           C
ATOM   4171  HB1 GLN A 559     106.810  28.000  19.060  1.00  0.00           H
ATOM   4172  HB2 GLN A 559     105.170  28.310  18.390  1.00  0.00           H
ATOM   4173  CG  GLN A 559     105.650  26.250  18.830  1.00  0.00           C
ATOM   4174  HG1 GLN A 559     104.590  25.990  18.790  1.00  0.00           H
ATOM   4175  HG2 GLN A 559     106.100  25.650  19.610  1.00  0.00           H
ATOM   4176  CD  GLN A 559     106.220  25.960  17.480  1.00  0.00           C
ATOM   4177  OE1 GLN A 559     107.370  25.660  17.360  1.00  0.00           O
ATOM   4178  NE2 GLN A 559     105.440  26.000  16.410  1.00  0.00           N
ATOM   4179 1HE2 GLN A 559     104.460  26.100  16.640  1.00  0.00           H
ATOM   4180 2HE2 GLN A 559     105.780  25.900  15.470  1.00  0.00           H
ATOM   4181  C   GLN A 559     105.470  29.540  20.980  1.00  0.00           C
ATOM   4182  O   GLN A 559     106.580  29.850  21.410  1.00  0.00           O
ATOM   4183  N   ARG A 560     104.550  30.500  20.840  1.00  0.00           N
ATOM   4184  H   ARG A 560     103.660  30.240  20.440  1.00  0.00           H
ATOM   4185  CA  ARG A 560     104.640  31.740  21.590  1.00  0.00           C
ATOM   4186  HA  ARG A 560     105.540  32.260  21.240  1.00  0.00           H
ATOM   4187  CB  ARG A 560     103.510  32.660  21.050  1.00  0.00           C
ATOM   4188  HB1 ARG A 560     102.530  32.460  21.500  1.00  0.00           H
ATOM   4189  HB2 ARG A 560     103.400  32.320  20.020  1.00  0.00           H
ATOM   4190  CG  ARG A 560     103.940  34.150  21.100  1.00  0.00           C
ATOM   4191  HG1 ARG A 560     104.810  34.410  20.490  1.00  0.00           H
ATOM   4192  HG2 ARG A 560     104.200  34.400  22.130  1.00  0.00           H
ATOM   4193  CD  ARG A 560     102.800  35.060  20.720  1.00  0.00           C
ATOM   4194  HD1 ARG A 560     103.230  36.060  20.740  1.00  0.00           H
ATOM   4195  HD2 ARG A 560     102.050  35.190  21.500  1.00  0.00           H
ATOM   4196  NE  ARG A 560     102.230  34.730  19.430  1.00  0.00           N
ATOM   4197  HE  ARG A 560     102.870  34.670  18.650  1.00  0.00           H
ATOM   4198  CZ  ARG A 560     100.940  34.690  19.110  1.00  0.00           C
ATOM   4199  NH1 ARG A 560     100.010  35.040  19.940  1.00  0.00           N
ATOM   4200 1HH1 ARG A 560     100.370  35.420  20.800  1.00  0.00           H
ATOM   4201 2HH1 ARG A 560      99.020  35.090  19.750  1.00  0.00           H
ATOM   4202  NH2 ARG A 560     100.530  34.290  17.940  1.00  0.00           N
ATOM   4203 1HH2 ARG A 560     101.060  33.800  17.240  1.00  0.00           H
ATOM   4204 2HH2 ARG A 560      99.540  34.400  17.760  1.00  0.00           H
ATOM   4205  C   ARG A 560     104.590  31.600  23.120  1.00  0.00           C
ATOM   4206  O   ARG A 560     103.670  31.050  23.760  1.00  0.00           O
ATOM   4207  N   ALA A 561     105.620  32.220  23.750  1.00  0.00           N
ATOM   4208  H   ALA A 561     106.320  32.440  23.060  1.00  0.00           H
ATOM   4209  CA  ALA A 561     106.080  32.140  25.170  1.00  0.00           C
ATOM   4210  HA  ALA A 561     106.370  31.110  25.360  1.00  0.00           H
ATOM   4211  CB  ALA A 561     107.300  33.130  25.220  1.00  0.00           C
ATOM   4212  HB1 ALA A 561     108.150  32.760  24.650  1.00  0.00           H
ATOM   4213  HB2 ALA A 561     106.970  34.110  24.890  1.00  0.00           H
ATOM   4214  HB3 ALA A 561     107.610  33.160  26.270  1.00  0.00           H
ATOM   4215  C   ALA A 561     104.980  32.570  26.220  1.00  0.00           C
ATOM   4216  O   ALA A 561     104.050  33.360  25.960  1.00  0.00           O
ATOM   4217  N   THR A 562     105.070  32.000  27.410  1.00  0.00           N
ATOM   4218  H   THR A 562     105.660  31.210  27.580  1.00  0.00           H
ATOM   4219  CA  THR A 562     104.240  32.510  28.540  1.00  0.00           C
ATOM   4220  HA  THR A 562     103.300  32.980  28.250  1.00  0.00           H
ATOM   4221  CB  THR A 562     103.920  31.360  29.490  1.00  0.00           C
ATOM   4222  HB  THR A 562     103.290  31.640  30.330  1.00  0.00           H
ATOM   4223  CG2 THR A 562     103.080  30.270  28.790  1.00  0.00           C
ATOM   4224 1HG2 THR A 562     103.520  29.920  27.860  1.00  0.00           H
ATOM   4225 2HG2 THR A 562     103.090  29.380  29.420  1.00  0.00           H
ATOM   4226 3HG2 THR A 562     102.040  30.530  28.610  1.00  0.00           H
ATOM   4227  OG1 THR A 562     105.090  30.640  30.020  1.00  0.00           O
ATOM   4228  HG1 THR A 562     105.730  30.340  29.370  1.00  0.00           H
ATOM   4229  C   THR A 562     105.070  33.520  29.290  1.00  0.00           C
ATOM   4230  O   THR A 562     106.280  33.580  29.270  1.00  0.00           O
ATOM   4231  N   ALA A 563     104.350  34.400  30.040  1.00  0.00           N
ATOM   4232  H   ALA A 563     103.360  34.220  30.130  1.00  0.00           H
ATOM   4233  CA  ALA A 563     105.030  35.270  30.990  1.00  0.00           C
ATOM   4234  HA  ALA A 563     105.770  35.660  30.300  1.00  0.00           H
ATOM   4235  CB  ALA A 563     104.090  36.410  31.460  1.00  0.00           C
ATOM   4236  HB1 ALA A 563     103.300  36.020  32.100  1.00  0.00           H
ATOM   4237  HB2 ALA A 563     104.730  37.160  31.920  1.00  0.00           H
ATOM   4238  HB3 ALA A 563     103.670  36.800  30.530  1.00  0.00           H
ATOM   4239  C   ALA A 563     105.930  34.590  32.070  1.00  0.00           C
ATOM   4240  O   ALA A 563     106.980  35.090  32.510  1.00  0.00           O
ATOM   4241  N   ALA A 564     105.580  33.380  32.390  1.00  0.00           N
ATOM   4242  H   ALA A 564     104.650  33.170  32.050  1.00  0.00           H
ATOM   4243  CA  ALA A 564     106.410  32.570  33.260  1.00  0.00           C
ATOM   4244  HA  ALA A 564     106.510  33.160  34.170  1.00  0.00           H
ATOM   4245  CB  ALA A 564     105.720  31.260  33.600  1.00  0.00           C
ATOM   4246  HB1 ALA A 564     104.950  31.430  34.350  1.00  0.00           H
ATOM   4247  HB2 ALA A 564     105.210  30.960  32.680  1.00  0.00           H
ATOM   4248  HB3 ALA A 564     106.380  30.520  34.050  1.00  0.00           H
ATOM   4249  C   ALA A 564     107.880  32.250  32.760  1.00  0.00           C
ATOM   4250  O   ALA A 564     108.770  32.320  33.650  1.00  0.00           O
ATOM   4251  N   GLU A 565     108.090  32.040  31.440  1.00  0.00           N
ATOM   4252  H   GLU A 565     107.270  31.950  30.860  1.00  0.00           H
ATOM   4253  CA  GLU A 565     109.420  31.970  30.820  1.00  0.00           C
ATOM   4254  HA  GLU A 565     110.130  31.480  31.480  1.00  0.00           H
ATOM   4255  CB  GLU A 565     109.240  31.090  29.550  1.00  0.00           C
ATOM   4256  HB1 GLU A 565     108.430  31.510  28.940  1.00  0.00           H
ATOM   4257  HB2 GLU A 565     108.850  30.120  29.840  1.00  0.00           H
ATOM   4258  CG  GLU A 565     110.580  30.870  28.820  1.00  0.00           C
ATOM   4259  HG1 GLU A 565     111.240  30.260  29.440  1.00  0.00           H
ATOM   4260  HG2 GLU A 565     111.120  31.780  28.560  1.00  0.00           H
ATOM   4261  CD  GLU A 565     110.520  30.140  27.470  1.00  0.00           C
ATOM   4262  OE1 GLU A 565     109.420  29.720  27.110  1.00  0.00           O
ATOM   4263  OE2 GLU A 565     111.550  30.010  26.770  1.00  0.00           O
ATOM   4264  C   GLU A 565     110.040  33.340  30.530  1.00  0.00           C
ATOM   4265  O   GLU A 565     111.210  33.550  30.820  1.00  0.00           O
ATOM   4266  N   LEU A 566     109.240  34.280  30.040  1.00  0.00           N
ATOM   4267  H   LEU A 566     108.320  34.050  29.690  1.00  0.00           H
ATOM   4268  CA  LEU A 566     109.660  35.650  29.720  1.00  0.00           C
ATOM   4269  HA  LEU A 566     110.530  35.610  29.070  1.00  0.00           H
ATOM   4270  CB  LEU A 566     108.570  36.380  28.950  1.00  0.00           C
ATOM   4271  HB1 LEU A 566     108.840  37.400  28.670  1.00  0.00           H
ATOM   4272  HB2 LEU A 566     107.620  36.450  29.470  1.00  0.00           H
ATOM   4273  CG  LEU A 566     108.220  35.750  27.590  1.00  0.00           C
ATOM   4274  HG  LEU A 566     108.010  34.690  27.770  1.00  0.00           H
ATOM   4275  CD1 LEU A 566     107.060  36.560  26.900  1.00  0.00           C
ATOM   4276 1HD1 LEU A 566     106.200  36.640  27.570  1.00  0.00           H
ATOM   4277 2HD1 LEU A 566     107.380  37.580  26.710  1.00  0.00           H
ATOM   4278 3HD1 LEU A 566     106.750  36.030  26.010  1.00  0.00           H
ATOM   4279  CD2 LEU A 566     109.340  35.770  26.550  1.00  0.00           C
ATOM   4280 1HD2 LEU A 566     109.970  35.010  27.020  1.00  0.00           H
ATOM   4281 2HD2 LEU A 566     109.000  35.360  25.600  1.00  0.00           H
ATOM   4282 3HD2 LEU A 566     110.040  36.600  26.500  1.00  0.00           H
ATOM   4283  C   LEU A 566     110.240  36.350  30.920  1.00  0.00           C
ATOM   4284  O   LEU A 566     111.300  36.950  30.930  1.00  0.00           O
ATOM   4285  N   LEU A 567     109.480  36.320  32.040  1.00  0.00           N
ATOM   4286  H   LEU A 567     108.660  35.740  32.080  1.00  0.00           H
ATOM   4287  CA  LEU A 567     109.900  37.020  33.260  1.00  0.00           C
ATOM   4288  HA  LEU A 567     110.010  38.060  32.970  1.00  0.00           H
ATOM   4289  CB  LEU A 567     108.690  36.940  34.240  1.00  0.00           C
ATOM   4290  HB1 LEU A 567     108.550  35.900  34.550  1.00  0.00           H
ATOM   4291  HB2 LEU A 567     107.750  37.230  33.770  1.00  0.00           H
ATOM   4292  CG  LEU A 567     108.870  37.870  35.410  1.00  0.00           C
ATOM   4293  HG  LEU A 567     109.760  37.490  35.900  1.00  0.00           H
ATOM   4294  CD1 LEU A 567     109.090  39.340  35.100  1.00  0.00           C
ATOM   4295 1HD1 LEU A 567     108.260  39.790  34.570  1.00  0.00           H
ATOM   4296 2HD1 LEU A 567     109.410  39.860  36.010  1.00  0.00           H
ATOM   4297 3HD1 LEU A 567     109.980  39.380  34.470  1.00  0.00           H
ATOM   4298  CD2 LEU A 567     107.630  37.740  36.290  1.00  0.00           C
ATOM   4299 1HD2 LEU A 567     107.520  36.670  36.500  1.00  0.00           H
ATOM   4300 2HD2 LEU A 567     107.780  38.270  37.230  1.00  0.00           H
ATOM   4301 3HD2 LEU A 567     106.710  38.130  35.850  1.00  0.00           H
ATOM   4302  C   LEU A 567     111.240  36.630  33.840  1.00  0.00           C
ATOM   4303  O   LEU A 567     111.920  37.510  34.480  1.00  0.00           O
ATOM   4304  N   LYS A 568     111.730  35.410  33.620  1.00  0.00           N
ATOM   4305  H   LYS A 568     111.130  34.850  33.040  1.00  0.00           H
ATOM   4306  CA  LYS A 568     113.070  34.970  33.890  1.00  0.00           C
ATOM   4307  HA  LYS A 568     113.460  35.540  34.740  1.00  0.00           H
ATOM   4308  CB  LYS A 568     112.970  33.640  34.700  1.00  0.00           C
ATOM   4309  HB1 LYS A 568     113.950  33.250  34.950  1.00  0.00           H
ATOM   4310  HB2 LYS A 568     112.510  32.890  34.050  1.00  0.00           H
ATOM   4311  CG  LYS A 568     112.250  33.660  36.090  1.00  0.00           C
ATOM   4312  HG1 LYS A 568     111.200  33.800  35.850  1.00  0.00           H
ATOM   4313  HG2 LYS A 568     112.600  34.480  36.720  1.00  0.00           H
ATOM   4314  CD  LYS A 568     112.370  32.380  36.890  1.00  0.00           C
ATOM   4315  HD1 LYS A 568     113.440  32.170  36.940  1.00  0.00           H
ATOM   4316  HD2 LYS A 568     112.000  31.600  36.230  1.00  0.00           H
ATOM   4317  CE  LYS A 568     111.880  32.460  38.330  1.00  0.00           C
ATOM   4318  HE1 LYS A 568     110.810  32.590  38.230  1.00  0.00           H
ATOM   4319  HE2 LYS A 568     112.370  33.290  38.850  1.00  0.00           H
ATOM   4320  NZ  LYS A 568     112.110  31.260  39.140  1.00  0.00           N
ATOM   4321  HZ1 LYS A 568     111.700  30.410  38.770  1.00  0.00           H
ATOM   4322  HZ2 LYS A 568     113.110  31.260  39.260  1.00  0.00           H
ATOM   4323  HZ3 LYS A 568     111.690  31.420  40.040  1.00  0.00           H
ATOM   4324  C   LYS A 568     114.070  34.960  32.750  1.00  0.00           C
ATOM   4325  O   LYS A 568     115.010  34.190  32.790  1.00  0.00           O
ATOM   4326  N   HIS A 569     113.790  35.660  31.680  1.00  0.00           N
ATOM   4327  H   HIS A 569     112.900  36.140  31.650  1.00  0.00           H
ATOM   4328  CA  HIS A 569     114.600  35.520  30.460  1.00  0.00           C
ATOM   4329  HA  HIS A 569     114.790  34.450  30.400  1.00  0.00           H
ATOM   4330  CB  HIS A 569     113.780  36.080  29.270  1.00  0.00           C
ATOM   4331  HB1 HIS A 569     113.230  36.990  29.530  1.00  0.00           H
ATOM   4332  HB2 HIS A 569     113.040  35.310  29.070  1.00  0.00           H
ATOM   4333  CG  HIS A 569     114.430  36.160  27.850  1.00  0.00           C
ATOM   4334  ND1 HIS A 569     115.360  37.100  27.500  1.00  0.00           N
ATOM   4335  CE1 HIS A 569     115.670  36.870  26.240  1.00  0.00           C
ATOM   4336  HE1 HIS A 569     116.490  37.310  25.700  1.00  0.00           H
ATOM   4337  NE2 HIS A 569     115.060  35.810  25.790  1.00  0.00           N
ATOM   4338  HE2 HIS A 569     115.390  35.290  24.990  1.00  0.00           H
ATOM   4339  CD2 HIS A 569     114.240  35.320  26.830  1.00  0.00           C
ATOM   4340  HD2 HIS A 569     113.640  34.420  26.730  1.00  0.00           H
ATOM   4341  C   HIS A 569     115.930  36.270  30.540  1.00  0.00           C
ATOM   4342  O   HIS A 569     116.000  37.260  31.230  1.00  0.00           O
ATOM   4343  N   PRO A 570     117.020  35.790  29.890  1.00  0.00           N
ATOM   4344  CD  PRO A 570     117.160  34.580  29.060  1.00  0.00           C
ATOM   4345  HD1 PRO A 570     116.770  34.780  28.060  1.00  0.00           H
ATOM   4346  HD2 PRO A 570     116.570  33.760  29.470  1.00  0.00           H
ATOM   4347  CG  PRO A 570     118.670  34.240  29.030  1.00  0.00           C
ATOM   4348  HG1 PRO A 570     118.900  33.500  28.260  1.00  0.00           H
ATOM   4349  HG2 PRO A 570     118.850  33.660  29.930  1.00  0.00           H
ATOM   4350  CB  PRO A 570     119.370  35.560  29.110  1.00  0.00           C
ATOM   4351  HB1 PRO A 570     119.440  35.960  28.100  1.00  0.00           H
ATOM   4352  HB2 PRO A 570     120.320  35.320  29.600  1.00  0.00           H
ATOM   4353  CA  PRO A 570     118.380  36.410  29.940  1.00  0.00           C
ATOM   4354  HA  PRO A 570     118.850  36.340  30.920  1.00  0.00           H
ATOM   4355  C   PRO A 570     118.530  37.930  29.600  1.00  0.00           C
ATOM   4356  O   PRO A 570     119.520  38.580  30.030  1.00  0.00           O
ATOM   4357  N   PHE A 571     117.590  38.600  28.890  1.00  0.00           N
ATOM   4358  H   PHE A 571     116.860  38.030  28.480  1.00  0.00           H
ATOM   4359  CA  PHE A 571     117.420  40.040  28.640  1.00  0.00           C
ATOM   4360  HA  PHE A 571     118.410  40.420  28.380  1.00  0.00           H
ATOM   4361  CB  PHE A 571     116.450  40.170  27.490  1.00  0.00           C
ATOM   4362  HB1 PHE A 571     115.500  39.760  27.840  1.00  0.00           H
ATOM   4363  HB2 PHE A 571     116.720  39.720  26.540  1.00  0.00           H
ATOM   4364  CG  PHE A 571     116.110  41.680  27.180  1.00  0.00           C
ATOM   4365  CD1 PHE A 571     117.090  42.620  26.770  1.00  0.00           C
ATOM   4366  HD1 PHE A 571     118.080  42.270  26.510  1.00  0.00           H
ATOM   4367  CE1 PHE A 571     116.690  43.910  26.470  1.00  0.00           C
ATOM   4368  HE1 PHE A 571     117.340  44.650  26.030  1.00  0.00           H
ATOM   4369  CZ  PHE A 571     115.310  44.220  26.410  1.00  0.00           C
ATOM   4370  HZ  PHE A 571     114.930  45.150  26.010  1.00  0.00           H
ATOM   4371  CE2 PHE A 571     114.360  43.350  26.920  1.00  0.00           C
ATOM   4372  HE2 PHE A 571     113.320  43.560  26.710  1.00  0.00           H
ATOM   4373  CD2 PHE A 571     114.740  42.110  27.360  1.00  0.00           C
ATOM   4374  HD2 PHE A 571     113.970  41.450  27.720  1.00  0.00           H
ATOM   4375  C   PHE A 571     117.120  40.780  29.990  1.00  0.00           C
ATOM   4376  O   PHE A 571     117.530  41.930  30.200  1.00  0.00           O
ATOM   4377  N   LEU A 572     116.300  40.150  30.830  1.00  0.00           N
ATOM   4378  H   LEU A 572     115.860  39.330  30.430  1.00  0.00           H
ATOM   4379  CA  LEU A 572     115.850  40.600  32.140  1.00  0.00           C
ATOM   4380  HA  LEU A 572     115.940  41.680  32.270  1.00  0.00           H
ATOM   4381  CB  LEU A 572     114.390  40.160  32.390  1.00  0.00           C
ATOM   4382  HB1 LEU A 572     114.170  40.540  33.390  1.00  0.00           H
ATOM   4383  HB2 LEU A 572     114.400  39.080  32.470  1.00  0.00           H
ATOM   4384  CG  LEU A 572     113.340  40.670  31.430  1.00  0.00           C
ATOM   4385  HG  LEU A 572     113.420  40.200  30.460  1.00  0.00           H
ATOM   4386  CD1 LEU A 572     111.890  40.600  31.940  1.00  0.00           C
ATOM   4387 1HD1 LEU A 572     111.820  40.970  32.960  1.00  0.00           H
ATOM   4388 2HD1 LEU A 572     111.140  41.090  31.320  1.00  0.00           H
ATOM   4389 3HD1 LEU A 572     111.600  39.550  32.030  1.00  0.00           H
ATOM   4390  CD2 LEU A 572     113.460  42.120  31.080  1.00  0.00           C
ATOM   4391 1HD2 LEU A 572     113.620  42.760  31.950  1.00  0.00           H
ATOM   4392 2HD2 LEU A 572     114.310  42.220  30.410  1.00  0.00           H
ATOM   4393 3HD2 LEU A 572     112.630  42.540  30.510  1.00  0.00           H
ATOM   4394  C   LEU A 572     116.790  40.160  33.300  1.00  0.00           C
ATOM   4395  O   LEU A 572     116.400  40.330  34.460  1.00  0.00           O
ATOM   4396  N   ALA A 573     118.010  39.650  33.030  1.00  0.00           N
ATOM   4397  H   ALA A 573     118.150  39.240  32.110  1.00  0.00           H
ATOM   4398  CA  ALA A 573     119.120  39.560  34.040  1.00  0.00           C
ATOM   4399  HA  ALA A 573     118.670  39.190  34.970  1.00  0.00           H
ATOM   4400  CB  ALA A 573     119.990  38.460  33.470  1.00  0.00           C
ATOM   4401  HB1 ALA A 573     120.150  38.710  32.420  1.00  0.00           H
ATOM   4402  HB2 ALA A 573     120.940  38.390  34.000  1.00  0.00           H
ATOM   4403  HB3 ALA A 573     119.390  37.550  33.390  1.00  0.00           H
ATOM   4404  C   ALA A 573     120.010  40.870  34.220  1.00  0.00           C
ATOM   4405  O   ALA A 573     120.940  40.850  35.000  1.00  0.00           O
ATOM   4406  N   LYS A 574     119.700  41.900  33.450  1.00  0.00           N
ATOM   4407  H   LYS A 574     119.090  41.620  32.700  1.00  0.00           H
ATOM   4408  CA  LYS A 574     120.380  43.240  33.390  1.00  0.00           C
ATOM   4409  HA  LYS A 574     120.840  43.570  34.320  1.00  0.00           H
ATOM   4410  CB  LYS A 574     121.490  43.230  32.370  1.00  0.00           C
ATOM   4411  HB1 LYS A 574     121.090  42.980  31.390  1.00  0.00           H
ATOM   4412  HB2 LYS A 574     122.250  42.510  32.690  1.00  0.00           H
ATOM   4413  CG  LYS A 574     122.150  44.640  32.270  1.00  0.00           C
ATOM   4414  HG1 LYS A 574     122.390  45.030  33.260  1.00  0.00           H
ATOM   4415  HG2 LYS A 574     121.510  45.390  31.810  1.00  0.00           H
ATOM   4416  CD  LYS A 574     123.420  44.420  31.430  1.00  0.00           C
ATOM   4417  HD1 LYS A 574     123.270  43.900  30.490  1.00  0.00           H
ATOM   4418  HD2 LYS A 574     124.120  43.830  32.020  1.00  0.00           H
ATOM   4419  CE  LYS A 574     124.160  45.730  30.990  1.00  0.00           C
ATOM   4420  HE1 LYS A 574     125.070  45.540  30.430  1.00  0.00           H
ATOM   4421  HE2 LYS A 574     124.390  46.300  31.890  1.00  0.00           H
ATOM   4422  NZ  LYS A 574     123.240  46.570  30.160  1.00  0.00           N
ATOM   4423  HZ1 LYS A 574     122.620  47.030  30.810  1.00  0.00           H
ATOM   4424  HZ2 LYS A 574     123.780  47.300  29.730  1.00  0.00           H
ATOM   4425  HZ3 LYS A 574     122.800  46.040  29.430  1.00  0.00           H
ATOM   4426  C   LYS A 574     119.370  44.340  32.980  1.00  0.00           C
ATOM   4427  O   LYS A 574     119.090  44.550  31.790  1.00  0.00           O
ATOM   4428  N   ALA A 575     118.810  45.030  33.920  1.00  0.00           N
ATOM   4429  H   ALA A 575     119.000  44.720  34.860  1.00  0.00           H
ATOM   4430  CA  ALA A 575     117.890  46.090  33.750  1.00  0.00           C
ATOM   4431  HA  ALA A 575     117.880  46.450  32.720  1.00  0.00           H
ATOM   4432  CB  ALA A 575     116.450  45.510  34.010  1.00  0.00           C
ATOM   4433  HB1 ALA A 575     116.380  45.310  35.080  1.00  0.00           H
ATOM   4434  HB2 ALA A 575     115.660  46.250  33.890  1.00  0.00           H
ATOM   4435  HB3 ALA A 575     116.340  44.690  33.300  1.00  0.00           H
ATOM   4436  C   ALA A 575     118.210  47.320  34.600  1.00  0.00           C
ATOM   4437  O   ALA A 575     118.670  47.160  35.700  1.00  0.00           O
ATOM   4438  N   GLY A 576     117.860  48.530  34.090  1.00  0.00           N
ATOM   4439  H   GLY A 576     117.450  48.630  33.170  1.00  0.00           H
ATOM   4440  CA  GLY A 576     118.180  49.730  34.870  1.00  0.00           C
ATOM   4441  HA1 GLY A 576     118.310  50.640  34.280  1.00  0.00           H
ATOM   4442  HA2 GLY A 576     119.080  49.520  35.450  1.00  0.00           H
ATOM   4443  C   GLY A 576     117.090  50.120  35.860  1.00  0.00           C
ATOM   4444  O   GLY A 576     115.920  49.940  35.560  1.00  0.00           O
ATOM   4445  N   PRO A 577     117.400  50.560  37.080  1.00  0.00           N
ATOM   4446  CD  PRO A 577     118.710  50.610  37.670  1.00  0.00           C
ATOM   4447  HD1 PRO A 577     119.410  50.910  36.900  1.00  0.00           H
ATOM   4448  HD2 PRO A 577     118.890  49.660  38.170  1.00  0.00           H
ATOM   4449  CG  PRO A 577     118.700  51.610  38.840  1.00  0.00           C
ATOM   4450  HG1 PRO A 577     118.850  52.600  38.420  1.00  0.00           H
ATOM   4451  HG2 PRO A 577     119.440  51.440  39.620  1.00  0.00           H
ATOM   4452  CB  PRO A 577     117.250  51.550  39.290  1.00  0.00           C
ATOM   4453  HB1 PRO A 577     116.900  52.420  39.850  1.00  0.00           H
ATOM   4454  HB2 PRO A 577     116.970  50.660  39.860  1.00  0.00           H
ATOM   4455  CA  PRO A 577     116.490  51.250  37.970  1.00  0.00           C
ATOM   4456  HA  PRO A 577     115.710  50.520  38.180  1.00  0.00           H
ATOM   4457  C   PRO A 577     115.810  52.490  37.410  1.00  0.00           C
ATOM   4458  O   PRO A 577     116.290  53.160  36.520  1.00  0.00           O
ATOM   4459  N   PRO A 578     114.750  53.000  38.060  1.00  0.00           N
ATOM   4460  CD  PRO A 578     113.920  52.290  39.120  1.00  0.00           C
ATOM   4461  HD1 PRO A 578     114.540  52.260  40.010  1.00  0.00           H
ATOM   4462  HD2 PRO A 578     113.770  51.230  38.900  1.00  0.00           H
ATOM   4463  CG  PRO A 578     112.640  53.120  39.310  1.00  0.00           C
ATOM   4464  HG1 PRO A 578     112.260  53.150  40.340  1.00  0.00           H
ATOM   4465  HG2 PRO A 578     111.890  52.570  38.730  1.00  0.00           H
ATOM   4466  CB  PRO A 578     112.910  54.500  38.780  1.00  0.00           C
ATOM   4467  HB1 PRO A 578     113.260  55.150  39.580  1.00  0.00           H
ATOM   4468  HB2 PRO A 578     111.980  54.920  38.400  1.00  0.00           H
ATOM   4469  CA  PRO A 578     114.010  54.270  37.700  1.00  0.00           C
ATOM   4470  HA  PRO A 578     113.550  54.200  36.710  1.00  0.00           H
ATOM   4471  C   PRO A 578     114.950  55.490  37.540  1.00  0.00           C
ATOM   4472  O   PRO A 578     114.740  56.260  36.560  1.00  0.00           O
ATOM   4473  N   ALA A 579     115.960  55.600  38.400  1.00  0.00           N
ATOM   4474  H   ALA A 579     116.020  55.010  39.210  1.00  0.00           H
ATOM   4475  CA  ALA A 579     116.990  56.780  38.320  1.00  0.00           C
ATOM   4476  HA  ALA A 579     116.350  57.660  38.370  1.00  0.00           H
ATOM   4477  CB  ALA A 579     117.860  56.590  39.550  1.00  0.00           C
ATOM   4478  HB1 ALA A 579     118.240  55.570  39.600  1.00  0.00           H
ATOM   4479  HB2 ALA A 579     118.770  57.180  39.410  1.00  0.00           H
ATOM   4480  HB3 ALA A 579     117.440  56.760  40.540  1.00  0.00           H
ATOM   4481  C   ALA A 579     117.760  56.670  37.040  1.00  0.00           C
ATOM   4482  O   ALA A 579     118.330  57.680  36.620  1.00  0.00           O
ATOM   4483  N   SER A 580     117.730  55.570  36.240  1.00  0.00           N
ATOM   4484  H   SER A 580     117.120  54.820  36.510  1.00  0.00           H
ATOM   4485  CA  SER A 580     118.350  55.410  34.930  1.00  0.00           C
ATOM   4486  HA  SER A 580     119.170  56.120  34.870  1.00  0.00           H
ATOM   4487  CB  SER A 580     118.890  54.000  34.750  1.00  0.00           C
ATOM   4488  HB1 SER A 580     119.470  53.950  33.830  1.00  0.00           H
ATOM   4489  HB2 SER A 580     118.120  53.230  34.710  1.00  0.00           H
ATOM   4490  OG  SER A 580     119.760  53.560  35.780  1.00  0.00           O
ATOM   4491  HG  SER A 580     120.050  52.690  35.520  1.00  0.00           H
ATOM   4492  C   SER A 580     117.380  55.590  33.720  1.00  0.00           C
ATOM   4493  O   SER A 580     117.810  55.480  32.560  1.00  0.00           O
ATOM   4494  N   ILE A 581     116.130  55.870  34.010  1.00  0.00           N
ATOM   4495  H   ILE A 581     115.790  55.930  34.960  1.00  0.00           H
ATOM   4496  CA  ILE A 581     115.010  56.180  33.040  1.00  0.00           C
ATOM   4497  HA  ILE A 581     115.370  55.970  32.030  1.00  0.00           H
ATOM   4498  CB  ILE A 581     113.780  55.300  33.240  1.00  0.00           C
ATOM   4499  HB  ILE A 581     113.410  55.550  34.240  1.00  0.00           H
ATOM   4500  CG2 ILE A 581     112.640  55.610  32.200  1.00  0.00           C
ATOM   4501 1HG2 ILE A 581     111.770  55.020  32.480  1.00  0.00           H
ATOM   4502 2HG2 ILE A 581     112.240  56.630  32.250  1.00  0.00           H
ATOM   4503 3HG2 ILE A 581     112.970  55.250  31.230  1.00  0.00           H
ATOM   4504  CG1 ILE A 581     114.130  53.750  33.230  1.00  0.00           C
ATOM   4505 1HG1 ILE A 581     115.070  53.550  33.760  1.00  0.00           H
ATOM   4506 2HG1 ILE A 581     114.300  53.410  32.210  1.00  0.00           H
ATOM   4507  CD  ILE A 581     113.080  52.810  33.950  1.00  0.00           C
ATOM   4508  HD1 ILE A 581     112.810  53.180  34.940  1.00  0.00           H
ATOM   4509  HD2 ILE A 581     112.180  52.850  33.340  1.00  0.00           H
ATOM   4510  HD3 ILE A 581     113.550  51.840  34.080  1.00  0.00           H
ATOM   4511  C   ILE A 581     114.640  57.640  32.940  1.00  0.00           C
ATOM   4512  O   ILE A 581     114.550  58.210  31.870  1.00  0.00           O
ATOM   4513  N   VAL A 582     114.500  58.280  34.100  1.00  0.00           N
ATOM   4514  H   VAL A 582     114.520  57.750  34.960  1.00  0.00           H
ATOM   4515  CA  VAL A 582     114.270  59.690  34.300  1.00  0.00           C
ATOM   4516  HA  VAL A 582     113.250  59.920  33.970  1.00  0.00           H
ATOM   4517  CB  VAL A 582     114.240  60.120  35.770  1.00  0.00           C
ATOM   4518  HB  VAL A 582     113.940  61.170  35.820  1.00  0.00           H
ATOM   4519  CG1 VAL A 582     113.160  59.420  36.490  1.00  0.00           C
ATOM   4520 1HG1 VAL A 582     113.050  59.900  37.470  1.00  0.00           H
ATOM   4521 2HG1 VAL A 582     112.200  59.440  35.960  1.00  0.00           H
ATOM   4522 3HG1 VAL A 582     113.480  58.420  36.770  1.00  0.00           H
ATOM   4523  CG2 VAL A 582     115.500  59.950  36.600  1.00  0.00           C
ATOM   4524 1HG2 VAL A 582     116.290  60.570  36.190  1.00  0.00           H
ATOM   4525 2HG2 VAL A 582     115.230  60.300  37.590  1.00  0.00           H
ATOM   4526 3HG2 VAL A 582     115.800  58.910  36.510  1.00  0.00           H
ATOM   4527  C   VAL A 582     115.260  60.570  33.600  1.00  0.00           C
ATOM   4528  O   VAL A 582     114.870  61.600  33.120  1.00  0.00           O
ATOM   4529  N   PRO A 583     116.550  60.220  33.260  1.00  0.00           N
ATOM   4530  CD  PRO A 583     117.410  59.090  33.670  1.00  0.00           C
ATOM   4531  HD1 PRO A 583     117.270  58.210  33.040  1.00  0.00           H
ATOM   4532  HD2 PRO A 583     117.100  58.710  34.640  1.00  0.00           H
ATOM   4533  CG  PRO A 583     118.890  59.490  33.770  1.00  0.00           C
ATOM   4534  HG1 PRO A 583     119.540  58.620  33.710  1.00  0.00           H
ATOM   4535  HG2 PRO A 583     119.030  60.100  34.660  1.00  0.00           H
ATOM   4536  CB  PRO A 583     118.820  60.400  32.570  1.00  0.00           C
ATOM   4537  HB1 PRO A 583     119.110  59.930  31.630  1.00  0.00           H
ATOM   4538  HB2 PRO A 583     119.570  61.160  32.760  1.00  0.00           H
ATOM   4539  CA  PRO A 583     117.440  61.020  32.440  1.00  0.00           C
ATOM   4540  HA  PRO A 583     117.440  61.930  33.040  1.00  0.00           H
ATOM   4541  C   PRO A 583     117.030  61.180  30.910  1.00  0.00           C
ATOM   4542  O   PRO A 583     117.500  62.110  30.240  1.00  0.00           O
ATOM   4543  N   LEU A 584     116.250  60.290  30.300  1.00  0.00           N
ATOM   4544  H   LEU A 584     115.890  59.500  30.830  1.00  0.00           H
ATOM   4545  CA  LEU A 584     115.680  60.360  28.950  1.00  0.00           C
ATOM   4546  HA  LEU A 584     116.510  60.390  28.240  1.00  0.00           H
ATOM   4547  CB  LEU A 584     114.730  59.120  28.680  1.00  0.00           C
ATOM   4548  HB1 LEU A 584     114.230  59.280  27.730  1.00  0.00           H
ATOM   4549  HB2 LEU A 584     113.950  59.110  29.450  1.00  0.00           H
ATOM   4550  CG  LEU A 584     115.480  57.760  28.560  1.00  0.00           C
ATOM   4551  HG  LEU A 584     116.210  57.790  29.360  1.00  0.00           H
ATOM   4552  CD1 LEU A 584     114.560  56.540  28.850  1.00  0.00           C
ATOM   4553 1HD1 LEU A 584     114.350  56.400  29.910  1.00  0.00           H
ATOM   4554 2HD1 LEU A 584     113.570  56.700  28.430  1.00  0.00           H
ATOM   4555 3HD1 LEU A 584     114.960  55.590  28.490  1.00  0.00           H
ATOM   4556  CD2 LEU A 584     116.160  57.500  27.240  1.00  0.00           C
ATOM   4557 1HD2 LEU A 584     116.860  56.670  27.240  1.00  0.00           H
ATOM   4558 2HD2 LEU A 584     115.500  57.530  26.380  1.00  0.00           H
ATOM   4559 3HD2 LEU A 584     116.920  58.250  27.020  1.00  0.00           H
ATOM   4560  C   LEU A 584     114.790  61.550  28.650  1.00  0.00           C
ATOM   4561  O   LEU A 584     114.550  61.910  27.490  1.00  0.00           O
ATOM   4562  N   MET A 585     114.350  62.230  29.680  1.00  0.00           N
ATOM   4563  H   MET A 585     114.740  61.910  30.550  1.00  0.00           H
ATOM   4564  CA  MET A 585     113.640  63.490  29.710  1.00  0.00           C
ATOM   4565  HA  MET A 585     113.400  63.640  28.660  1.00  0.00           H
ATOM   4566  CB  MET A 585     112.260  63.360  30.490  1.00  0.00           C
ATOM   4567  HB1 MET A 585     111.650  64.210  30.180  1.00  0.00           H
ATOM   4568  HB2 MET A 585     112.490  63.530  31.540  1.00  0.00           H
ATOM   4569  CG  MET A 585     111.480  62.060  30.340  1.00  0.00           C
ATOM   4570  HG1 MET A 585     111.540  61.710  29.310  1.00  0.00           H
ATOM   4571  HG2 MET A 585     110.430  62.290  30.520  1.00  0.00           H
ATOM   4572  SD  MET A 585     112.030  60.850  31.610  1.00  0.00           S
ATOM   4573  CE  MET A 585     110.560  59.770  31.720  1.00  0.00           C
ATOM   4574  HE1 MET A 585     110.530  59.120  32.590  1.00  0.00           H
ATOM   4575  HE2 MET A 585     109.680  60.360  31.470  1.00  0.00           H
ATOM   4576  HE3 MET A 585     110.620  59.060  30.890  1.00  0.00           H
ATOM   4577  C   MET A 585     114.520  64.740  30.060  1.00  0.00           C
ATOM   4578  O   MET A 585     114.010  65.870  30.190  1.00  0.00           O
ATOM   4579  N   ARG A 586     115.850  64.550  30.160  1.00  0.00           N
ATOM   4580  H   ARG A 586     116.140  63.580  30.110  1.00  0.00           H
ATOM   4581  CA  ARG A 586     116.730  65.590  30.670  1.00  0.00           C
ATOM   4582  HA  ARG A 586     116.210  66.530  30.790  1.00  0.00           H
ATOM   4583  CB  ARG A 586     117.310  65.190  32.090  1.00  0.00           C
ATOM   4584  HB1 ARG A 586     118.120  65.900  32.250  1.00  0.00           H
ATOM   4585  HB2 ARG A 586     117.710  64.180  32.100  1.00  0.00           H
ATOM   4586  CG  ARG A 586     116.180  65.510  33.140  1.00  0.00           C
ATOM   4587  HG1 ARG A 586     115.360  64.820  32.920  1.00  0.00           H
ATOM   4588  HG2 ARG A 586     115.930  66.560  33.000  1.00  0.00           H
ATOM   4589  CD  ARG A 586     116.640  65.150  34.550  1.00  0.00           C
ATOM   4590  HD1 ARG A 586     117.490  65.790  34.780  1.00  0.00           H
ATOM   4591  HD2 ARG A 586     116.860  64.090  34.710  1.00  0.00           H
ATOM   4592  NE  ARG A 586     115.630  65.380  35.600  1.00  0.00           N
ATOM   4593  HE  ARG A 586     115.310  64.530  36.040  1.00  0.00           H
ATOM   4594  CZ  ARG A 586     115.130  66.510  36.170  1.00  0.00           C
ATOM   4595  NH1 ARG A 586     115.260  67.690  35.620  1.00  0.00           N
ATOM   4596 1HH1 ARG A 586     115.780  67.840  34.770  1.00  0.00           H
ATOM   4597 2HH1 ARG A 586     114.820  68.500  36.030  1.00  0.00           H
ATOM   4598  NH2 ARG A 586     114.290  66.410  37.230  1.00  0.00           N
ATOM   4599 1HH2 ARG A 586     114.100  65.440  37.440  1.00  0.00           H
ATOM   4600 2HH2 ARG A 586     113.640  67.160  37.440  1.00  0.00           H
ATOM   4601  C   ARG A 586     117.830  65.950  29.680  1.00  0.00           C
ATOM   4602  O   ARG A 586     117.830  67.080  29.200  1.00  0.00           O
ATOM   4603  N   GLN A 587     118.820  65.080  29.480  1.00  0.00           N
ATOM   4604  H   GLN A 587     118.860  64.260  30.070  1.00  0.00           H
ATOM   4605  CA  GLN A 587     119.870  65.390  28.540  1.00  0.00           C
ATOM   4606  HA  GLN A 587     119.990  66.480  28.450  1.00  0.00           H
ATOM   4607  CB  GLN A 587     121.280  64.850  28.900  1.00  0.00           C
ATOM   4608  HB1 GLN A 587     121.960  64.930  28.060  1.00  0.00           H
ATOM   4609  HB2 GLN A 587     121.250  63.760  28.970  1.00  0.00           H
ATOM   4610  CG  GLN A 587     121.860  65.410  30.170  1.00  0.00           C
ATOM   4611  HG1 GLN A 587     121.840  66.480  29.960  1.00  0.00           H
ATOM   4612  HG2 GLN A 587     122.880  65.080  30.330  1.00  0.00           H
ATOM   4613  CD  GLN A 587     120.990  65.120  31.380  1.00  0.00           C
ATOM   4614  OE1 GLN A 587     120.490  65.960  32.090  1.00  0.00           O
ATOM   4615  NE2 GLN A 587     121.000  63.840  31.770  1.00  0.00           N
ATOM   4616 1HE2 GLN A 587     121.690  63.200  31.410  1.00  0.00           H
ATOM   4617 2HE2 GLN A 587     120.360  63.620  32.510  1.00  0.00           H
ATOM   4618  C   GLN A 587     119.300  64.870  27.120  1.00  0.00           C
ATOM   4619  O   GLN A 587     118.560  63.850  27.010  1.00  0.00           O
ATOM   4620  N   ASN A 588     119.650  65.550  26.040  1.00  0.00           N
ATOM   4621  H   ASN A 588     120.370  66.250  26.060  1.00  0.00           H
ATOM   4622  CA  ASN A 588     119.040  65.280  24.690  1.00  0.00           C
ATOM   4623  HA  ASN A 588     117.980  65.030  24.760  1.00  0.00           H
ATOM   4624  CB  ASN A 588     119.290  66.510  23.910  1.00  0.00           C
ATOM   4625  HB1 ASN A 588     120.310  66.540  23.530  1.00  0.00           H
ATOM   4626  HB2 ASN A 588     119.150  67.400  24.530  1.00  0.00           H
ATOM   4627  CG  ASN A 588     118.420  66.590  22.600  1.00  0.00           C
ATOM   4628  OD1 ASN A 588     117.820  65.720  22.100  1.00  0.00           O
ATOM   4629  ND2 ASN A 588     118.330  67.700  22.060  1.00  0.00           N
ATOM   4630 1HD2 ASN A 588     118.740  68.550  22.430  1.00  0.00           H
ATOM   4631 2HD2 ASN A 588     117.640  67.800  21.330  1.00  0.00           H
ATOM   4632  C   ASN A 588     119.710  64.000  24.080  1.00  0.00           C
ATOM   4633  O   ASN A 588     120.910  63.900  23.900  1.00  0.00           O
ATOM   4634  N   ARG A 589     118.830  63.040  23.860  1.00  0.00           N
ATOM   4635  H   ARG A 589     117.890  63.180  24.190  1.00  0.00           H
ATOM   4636  CA  ARG A 589     119.110  61.760  23.180  1.00  0.00           C
ATOM   4637  HA  ARG A 589     120.070  61.870  22.690  1.00  0.00           H
ATOM   4638  CB  ARG A 589     119.310  60.720  24.380  1.00  0.00           C
ATOM   4639  HB1 ARG A 589     118.360  60.430  24.830  1.00  0.00           H
ATOM   4640  HB2 ARG A 589     120.000  61.240  25.040  1.00  0.00           H
ATOM   4641  CG  ARG A 589     120.030  59.480  23.780  1.00  0.00           C
ATOM   4642  HG1 ARG A 589     120.880  59.790  23.180  1.00  0.00           H
ATOM   4643  HG2 ARG A 589     119.390  59.010  23.030  1.00  0.00           H
ATOM   4644  CD  ARG A 589     120.400  58.520  24.860  1.00  0.00           C
ATOM   4645  HD1 ARG A 589     119.500  58.030  25.230  1.00  0.00           H
ATOM   4646  HD2 ARG A 589     120.810  59.020  25.740  1.00  0.00           H
ATOM   4647  NE  ARG A 589     121.440  57.550  24.340  1.00  0.00           N
ATOM   4648  HE  ARG A 589     122.400  57.750  24.590  1.00  0.00           H
ATOM   4649  CZ  ARG A 589     121.290  56.410  23.640  1.00  0.00           C
ATOM   4650  NH1 ARG A 589     122.380  55.820  23.270  1.00  0.00           N
ATOM   4651 1HH1 ARG A 589     123.290  56.220  23.420  1.00  0.00           H
ATOM   4652 2HH1 ARG A 589     122.370  55.060  22.600  1.00  0.00           H
ATOM   4653  NH2 ARG A 589     120.160  55.970  23.270  1.00  0.00           N
ATOM   4654 1HH2 ARG A 589     119.340  56.470  23.600  1.00  0.00           H
ATOM   4655 2HH2 ARG A 589     120.050  54.980  23.080  1.00  0.00           H
ATOM   4656  C   ARG A 589     118.090  61.430  22.130  1.00  0.00           C
ATOM   4657  O   ARG A 589     117.560  60.320  22.020  1.00  0.00           O
ATOM   4658  N   THR A 590     117.870  62.430  21.280  1.00  0.00           N
ATOM   4659  H   THR A 590     118.240  63.360  21.470  1.00  0.00           H
ATOM   4660  CA  THR A 590     116.970  62.330  20.140  1.00  0.00           C
ATOM   4661  HA  THR A 590     116.110  61.740  20.440  1.00  0.00           H
ATOM   4662  CB  THR A 590     116.410  63.650  19.650  1.00  0.00           C
ATOM   4663  HB  THR A 590     116.090  63.660  18.610  1.00  0.00           H
ATOM   4664  CG2 THR A 590     115.260  64.190  20.550  1.00  0.00           C
ATOM   4665 1HG2 THR A 590     115.700  64.230  21.550  1.00  0.00           H
ATOM   4666 2HG2 THR A 590     115.010  65.200  20.240  1.00  0.00           H
ATOM   4667 3HG2 THR A 590     114.360  63.580  20.450  1.00  0.00           H
ATOM   4668  OG1 THR A 590     117.500  64.600  19.720  1.00  0.00           O
ATOM   4669  HG1 THR A 590     117.500  65.040  20.570  1.00  0.00           H
ATOM   4670  C   THR A 590     117.490  61.600  18.900  1.00  0.00           C
ATOM   4671  O   THR A 590     118.650  61.660  18.580  1.00  0.00           O
ATOM   4672  N   ARG A 591     116.570  61.000  18.170  1.00  0.00           N
ATOM   4673  H   ARG A 591     115.620  61.110  18.480  1.00  0.00           H
ATOM   4674  CA  ARG A 591     116.830  60.200  16.930  1.00  0.00           C
ATOM   4675  HA  ARG A 591     117.600  59.440  17.090  1.00  0.00           H
ATOM   4676  CB  ARG A 591     115.480  59.580  16.640  1.00  0.00           C
ATOM   4677  HB1 ARG A 591     115.580  59.030  15.700  1.00  0.00           H
ATOM   4678  HB2 ARG A 591     114.700  60.340  16.490  1.00  0.00           H
ATOM   4679  CG  ARG A 591     115.110  58.510  17.710  1.00  0.00           C
ATOM   4680  HG1 ARG A 591     115.080  58.880  18.740  1.00  0.00           H
ATOM   4681  HG2 ARG A 591     115.950  57.810  17.780  1.00  0.00           H
ATOM   4682  CD  ARG A 591     113.770  57.800  17.360  1.00  0.00           C
ATOM   4683  HD1 ARG A 591     113.780  57.550  16.300  1.00  0.00           H
ATOM   4684  HD2 ARG A 591     113.120  58.660  17.540  1.00  0.00           H
ATOM   4685  NE  ARG A 591     113.460  56.700  18.340  1.00  0.00           N
ATOM   4686  HE  ARG A 591     112.960  56.980  19.160  1.00  0.00           H
ATOM   4687  CZ  ARG A 591     114.010  55.490  18.380  1.00  0.00           C
ATOM   4688  NH1 ARG A 591     114.740  54.970  17.500  1.00  0.00           N
ATOM   4689 1HH1 ARG A 591     115.060  55.460  16.670  1.00  0.00           H
ATOM   4690 2HH1 ARG A 591     115.210  54.140  17.840  1.00  0.00           H
ATOM   4691  NH2 ARG A 591     113.640  54.670  19.270  1.00  0.00           N
ATOM   4692 1HH2 ARG A 591     112.900  54.960  19.890  1.00  0.00           H
ATOM   4693 2HH2 ARG A 591     114.140  53.790  19.300  1.00  0.00           H
ATOM   4694  C   ARG A 591     117.320  61.030  15.750  1.00  0.00           C
ATOM   4695  OC1 ARG A 591     116.810  62.150  15.500  1.00  0.00           O
ATOM   4696  OC2 ARG A 591     118.370  60.590  15.180  1.00  0.00           O
ATOM   4697  CL   5n B 592      98.670  65.690  28.270  1.00  0.00            
ATOM   4698  C    5n B 592      99.900  63.040  31.070  1.00  0.00            
ATOM   4699  C1   5n B 592      99.090  63.700  30.130  1.00  0.00            
ATOM   4700  HC   5n B 592      98.100  63.320  29.900  1.00  0.00            
ATOM   4701  C2   5n B 592     101.200  63.460  31.340  1.00  0.00            
ATOM   4702  H1   5n B 592     101.880  62.840  31.930  1.00  0.00            
ATOM   4703  C3   5n B 592      99.600  64.780  29.460  1.00  0.00            
ATOM   4704  C4   5n B 592     101.710  64.510  30.600  1.00  0.00            
ATOM   4705  H2   5n B 592     102.770  64.670  30.780  1.00  0.00            
ATOM   4706  C5   5n B 592     100.900  65.180  29.670  1.00  0.00            
ATOM   4707  H3   5n B 592     101.300  66.000  29.080  1.00  0.00            
ATOM   4708  N    5n B 592      99.460  61.890  31.700  1.00  0.00            
ATOM   4709  H    5n B 592     100.020  61.630  32.490  1.00  0.00            
ATOM   4710  C6   5n B 592      98.390  61.130  31.500  1.00  0.00            
ATOM   4711  N1   5n B 592      98.040  60.980  30.210  1.00  0.00            
ATOM   4712  C7   5n B 592      97.080  60.100  30.000  1.00  0.00            
ATOM   4713  C8   5n B 592      96.600  59.350  31.060  1.00  0.00            
ATOM   4714  C9   5n B 592      97.060  59.590  32.340  1.00  0.00            
ATOM   4715  C10  5n B 592      95.720  58.210  31.120  1.00  0.00            
ATOM   4716  H4   5n B 592      95.150  57.770  30.310  1.00  0.00            
ATOM   4717  N2   5n B 592      96.470  58.650  33.190  1.00  0.00            
ATOM   4718  N3   5n B 592      98.010  60.460  32.570  1.00  0.00            
ATOM   4719  C11  5n B 592      95.560  57.900  32.470  1.00  0.00            
ATOM   4720  H5   5n B 592      94.910  57.210  32.990  1.00  0.00            
ATOM   4721  H8   5n B 592      96.600  58.490  34.180  1.00  0.00            
ATOM   4722  N4   5n B 592      96.870  59.910  28.650  1.00  0.00            
ATOM   4723  H9   5n B 592      97.400  60.640  28.190  1.00  0.00            
ATOM   4724  C12  5n B 592      97.080  58.560  28.000  1.00  0.00            
ATOM   4725  H6   5n B 592      97.470  57.900  28.790  1.00  0.00            
ATOM   4726  C13  5n B 592      98.250  58.530  26.970  1.00  0.00            
ATOM   4727  HC1  5n B 592      99.110  59.070  27.400  1.00  0.00            
ATOM   4728  HC2  5n B 592      98.500  57.480  26.800  1.00  0.00            
ATOM   4729  C14  5n B 592      97.740  59.290  25.700  1.00  0.00            
ATOM   4730  H11  5n B 592      97.650  60.330  26.020  1.00  0.00            
ATOM   4731  H14  5n B 592      98.520  59.370  24.930  1.00  0.00            
ATOM   4732  C15  5n B 592      96.440  58.680  25.080  1.00  0.00            
ATOM   4733  H7   5n B 592      96.560  57.620  24.820  1.00  0.00            
ATOM   4734  C16  5n B 592      95.280  58.800  26.060  1.00  0.00            
ATOM   4735  H12  5n B 592      95.050  59.870  26.110  1.00  0.00            
ATOM   4736  H15  5n B 592      94.360  58.300  25.730  1.00  0.00            
ATOM   4737  C17  5n B 592      95.720  58.110  27.430  1.00  0.00            
ATOM   4738  H13  5n B 592      95.740  57.020  27.320  1.00  0.00            
ATOM   4739  H16  5n B 592      94.960  58.390  28.160  1.00  0.00            
ATOM   4740  N5   5n B 592      96.140  59.460  23.850  1.00  0.00            
ATOM   4741  HN   5n B 592      96.030  60.440  24.100  1.00  0.00            
ATOM   4742  H10  5n B 592      96.920  59.360  23.220  1.00  0.00            
TER
ENDMDL
